# Supplementary material for: Integrating Metabolomics and Proteomics Technologies Provides Insights into the Flavor Precursor Changes at Different Maturity Stages of Arabica Coffee Cherries
Source: Foods. 2023 Mar 28;12(7):1432. doi: 10.3390/foods12071432 (PMC10094060; doi:10.3390/foods12071432)
Supplement: Supplementary file 1 [file foods-12-01432-s001.zip › Supplementary Data S1.xlsx]

## Sheet: sheet1-positive
NO.	name	m/z	RT	RT/min	A1	A2	A3	A4	A5	A6	B1	B2	B3	B4	B5	B6	C1	C2	C3	C4	C5	C6	D1	D2	D3	D4	D5	D6	QC1	QC2	QC3	QC4	QC5
1	M81T95	81.0339	95.1097	1.59	1.06503e+09	1.05214e+09	1.08987e+09	1.00956e+09	1.01484e+09	1.12342e+09	7.78048e+08	8.30302e+08	7.17943e+08	1.27961e+09	1.01955e+09	8.34964e+08	5.99099e+08	5.98781e+08	6.2909e+08	1.22106e+09	6.02158e+08	5.84482e+08	5.75862e+08	5.97386e+08	6.16001e+08	5.09639e+08	5.38015e+08	5.0718e+08	6.65012e+08	7.54264e+08	6.94333e+08	6.23139e+08	6.73921e+08
2	M81T145	81.0339	145.116	2.42	4.48654e+07	1.54124e+08	4.44868e+07	1.29216e+08	4.36085e+07	1.83648e+08	1.17157e+08	2.92491e+08	7.7508e+08	4.24502e+08	1.93776e+08	1.14117e+08	1.61463e+08	2.58822e+08	2.4148e+08	1.359e+08	4.72934e+08	3.2729e+08	1.71999e+08	7.83023e+07	2.11627e+08	1.79718e+08	2.94428e+08	5.15202e+08	1.31115e+08	2.80141e+08	2.19755e+08	5.99635e+07	4.16477e+08
3	M81T104	81.0339	103.572	1.73	7.52259e+08	1.80741e+08	7.30763e+08	6.68458e+08	6.34661e+08	1.54153e+08	4.68088e+08	1.48205e+08	1.23316e+08	1.3293e+08	1.59691e+08	1.38816e+08	5.55405e+08	5.51648e+08	1.26478e+08	1.44066e+08	4.6827e+08	5.38422e+08	5.77052e+08	3.74364e+08	1.4985e+08	5.13244e+08	5.31933e+08	6.01434e+08	4.24429e+08	7.06771e+08	7.81133e+08	6.77687e+08	6.17143e+08
4	M81T123	81.034	122.918	2.05	2.87012e+08	5.19863e+08	2.05994e+08	2.99221e+08	3.95695e+08	3.68306e+08	2.49246e+08	2.6829e+08	1.92695e+08	3.21362e+08	1.82768e+08	3.6922e+08	6.13231e+07	4.94361e+08	2.91131e+08	5.55141e+08	2.93687e+08	2.83196e+08	3.11801e+08	4.34818e+08	4.23269e+08	3.31233e+08	1.98638e+08	2.54817e+08	1.32851e+08	4.4277e+08	4.42047e+08	2.22444e+08	3.02077e+08
5	M81T222	81.0337	221.926	3.7	1.06067e+07	1.04203e+07	1.07448e+07	1.01643e+07	1.10548e+07	1.05565e+07	3.78956e+07	7.32469e+07	1.04699e+07	4.71843e+07	9.69803e+07	1.26915e+07	8.06834e+07	4.92049e+07	1.31741e+07	5.38822e+07	1.48524e+07	1.40424e+07	1.63152e+07	1.62112e+07	1.82593e+07	6.70753e+07	6.77825e+07	8.73573e+07	3.08041e+07	4.64785e+07	1.06764e+07	4.78547e+07	5.17218e+07
6	M81T169	81.0339	168.565	2.81	2.38431e+07	2.39577e+07	2.49116e+07	2.64751e+07	3.04645e+07	2.78459e+07	8.3775e+07	1.46578e+08	2.55883e+07	9.88911e+07	7.81441e+07	3.43097e+07	2.72933e+08	3.99832e+07	3.83957e+07	1.12207e+08	2.34712e+08	3.76846e+07	1.64602e+08	4.41975e+07	1.62771e+08	2.58163e+08	1.52849e+08	1.80551e+08	8.52211e+07	1.82131e+08	2.98053e+07	1.1123e+08	2.91344e+08
7	M81T209	81.0337	208.724	3.48	1.09943e+07	1.06742e+07	1.38731e+07	1.25173e+07	1.23052e+07	1.32555e+07	4.82053e+07	3.89682e+07	1.31958e+07	8.02148e+07	5.88111e+07	1.38235e+07	1.25033e+08	7.44447e+07	5.4687e+07	1.34897e+08	1.72897e+07	1.57306e+07	8.11594e+07	1.98554e+07	2.11531e+07	1.07012e+08	8.26951e+07	1.05846e+08	4.30597e+07	4.48666e+07	1.18194e+07	1.43041e+07	6.59885e+07
8	M81T39	81.0532	38.9209	0.65	1.98624e+07	2.41209e+07	5.51688e+07	2.50907e+07	9.72921e+06	2.74884e+07	6.20498e+07	4.13469e+07	6.10143e+07	5.68558e+07	3.25306e+07	1.17944e+07	1.02206e+07	7.99081e+07	4.07755e+07	2.42356e+07	3.6846e+07	4.5442e+07	3.38256e+07	2.99833e+07	6.30578e+07	2.96652e+07	2.85055e+07	7.43684e+07	3.0382e+06	1.87649e+07	2.60236e+07	2.95429e+07	7.21718e+07
9	M82T79	81.5209	78.5079	1.31	3.34541e+08	3.72727e+08	3.3439e+08	9.43143e+07	3.56508e+08	4.1493e+08	7.01535e+08	7.53106e+08	6.90864e+08	7.47856e+08	7.67047e+08	8.04737e+08	7.40499e+08	7.39545e+08	8.80761e+08	8.30521e+08	7.35921e+08	7.44597e+08	8.87024e+08	1.1372e+09	1.17762e+09	1.02797e+09	8.40197e+08	1.29911e+09	7.38005e+08	6.41528e+08	7.23039e+08	9.35802e+08	7.6493e+08
10	M82T35	81.5209	35.049	0.58	1.62029e+09	7.68982e+08	7.19764e+08	1.52351e+09	7.26533e+08	6.14723e+08	1.13827e+09	5.89523e+08	7.66325e+08	9.46198e+08	1.73947e+09	6.79276e+08	7.31094e+08	1.73937e+09	7.01683e+08	1.21595e+09	1.23043e+09	1.04391e+09	6.9945e+08	1.53794e+09	7.30218e+08	6.00749e+08	6.28306e+08	1.87847e+09	7.08941e+08	7.17998e+08	4.98898e+08	1.37186e+09	1.33253e+09
11	M82T68	81.521	68.0743	1.13	5.94358e+08	1.61809e+08	8.78043e+08	1.44301e+09	1.05294e+09	1.38566e+09	8.09102e+08	6.18762e+08	1.05641e+09	1.704e+08	5.9734e+08	7.66833e+08	1.6037e+08	4.88099e+08	7.69743e+08	5.39568e+08	5.49936e+08	6.82176e+08	5.71276e+08	1.80599e+08	1.98971e+08	1.9556e+08	1.71308e+08	1.99904e+08	1.566e+08	8.61824e+08	5.92638e+08	1.79391e+08	1.9171e+08
12	M82T552	81.5205	552.234	9.2	7.04573e+08	1.30249e+08	1.30597e+08	1.2892e+08	1.20905e+08	1.28447e+08	6.16868e+08	7.15438e+08	6.14898e+08	4.71226e+08	6.49531e+08	1.57722e+08	1.39597e+08	1.5727e+08	7.32288e+08	1.46049e+08	8.56825e+08	6.00127e+08	7.75097e+08	4.85859e+08	7.17087e+08	4.86111e+08	5.14233e+08	5.66622e+08	5.30322e+08	1.27941e+08	1.31133e+08	1.24914e+08	1.41642e+08
13	M82T531	81.5206	531.465	8.86	1.36182e+08	2.29907e+09	1.62102e+08	8.81959e+08	1.4656e+08	1.64332e+08	1.68242e+08	5.07869e+08	5.06822e+08	5.35992e+08	1.29966e+09	7.59206e+08	4.04087e+09	3.95234e+09	6.06851e+08	7.15182e+08	4.56265e+08	1.6343e+08	8.67888e+08	7.21297e+08	1.63332e+08	8.94914e+08	7.67602e+08	8.80816e+08	7.59178e+08	4.8236e+08	9.02807e+08	7.86004e+08	1.32152e+09
14	M82T59	81.5209	58.6984	0.98	5.33717e+08	1.26141e+09	1.5243e+08	1.60661e+08	1.63682e+08	1.5602e+08	5.4555e+08	3.85542e+08	4.5392e+08	1.14685e+09	1.73302e+08	6.11864e+08	9.75052e+08	4.75865e+08	4.03281e+08	6.30421e+08	4.60271e+08	5.46781e+08	5.15631e+08	1.15165e+09	8.09165e+08	1.21942e+09	1.2007e+09	1.55637e+08	1.47865e+09	6.77075e+08	8.12442e+08	1.02337e+09	1.52743e+09
15	M82T544	81.5205	543.683	9.06	1.261e+08	1.25445e+08	5.66482e+08	1.00098e+09	1.17674e+09	6.75439e+08	6.33729e+08	4.63355e+08	6.07859e+08	6.17803e+08	6.2021e+08	7.69918e+08	1.07432e+08	1.1642e+08	6.02868e+08	1.28134e+08	1.20995e+08	4.61823e+08	1.37366e+08	9.10049e+08	6.87167e+08	2.1747e+08	6.59847e+08	5.71535e+08	5.55706e+08	9.83638e+08	6.16816e+08	7.27445e+08	1.22299e+09
16	M82T567	81.5208	566.936	9.45	7.21963e+08	1.82811e+08	1.44652e+09	1.35648e+09	1.93553e+08	1.66374e+09	6.68676e+08	6.87673e+08	8.44197e+08	1.77252e+08	1.02523e+09	7.20797e+08	1.96814e+08	2.00749e+08	4.26879e+08	2.06918e+08	1.87684e+08	5.99648e+08	6.2212e+08	5.89875e+08	6.91159e+08	8.0557e+08	8.34289e+08	9.76135e+08	9.60656e+08	1.80408e+08	2.02817e+08	1.99989e+08	2.27364e+08
17	M82T606	81.5206	606.139	10.1	9.74308e+08	1.95526e+08	7.95832e+08	8.80156e+08	1.98221e+08	1.15476e+09	5.09271e+08	8.26149e+08	2.25357e+09	2.06822e+08	9.1499e+08	4.74546e+08	1.03468e+09	9.08317e+08	2.07637e+08	8.80671e+08	2.13626e+08	9.48921e+08	1.19929e+09	7.34981e+08	8.668e+08	1.00765e+09	2.18256e+08	5.30316e+08	8.78789e+08	1.13496e+09	6.22645e+08	1.9786e+08	2.05211e+08
18	M82T662	81.5205	662.438	11.04	2.00822e+09	7.254e+08	2.05934e+09	5.9011e+08	7.97153e+08	2.39354e+09	4.94923e+08	1.9702e+09	5.86661e+08	3.12778e+09	5.30101e+08	8.80619e+08	4.66695e+09	2.27757e+08	5.24837e+08	3.31934e+09	4.10496e+09	7.73039e+08	8.15093e+08	1.17264e+09	3.18063e+09	1.87359e+08	5.83671e+08	5.26823e+08	6.25149e+08	1.59835e+08	5.93726e+08	1.45056e+09	9.07473e+08
19	M82T505	81.5208	505.187	8.42	1.67722e+08	7.54362e+08	1.63346e+08	7.67627e+08	1.74857e+08	1.73441e+08	1.79762e+08	7.90859e+08	7.86283e+08	8.58745e+08	1.9075e+08	1.89764e+08	2.00687e+08	1.84032e+08	1.24184e+09	8.81506e+08	9.40005e+08	5.90556e+08	1.48048e+09	8.98419e+08	1.92632e+08	8.67124e+08	9.48448e+08	9.50263e+08	7.51652e+08	8.6892e+08	1.76134e+08	1.82194e+08	8.73757e+08
20	M82T687	81.5209	686.567	11.44	5.23428e+08	1.38286e+08	1.31605e+08	1.20577e+09	1.16582e+09	7.91929e+08	5.77475e+08	4.6564e+08	1.02372e+09	1.3669e+08	4.2558e+08	4.79585e+08	1.16877e+08	2.54131e+08	6.93364e+08	1.36138e+08	2.91556e+08	1.44491e+08	5.56549e+08	8.99719e+08	7.86099e+07	5.62655e+07	5.10981e+08	3.85242e+08	4.27655e+08	2.09701e+09	9.6942e+08	1.38695e+08	7.74014e+08
21	M82T592	81.5206	592.303	9.87	1.43275e+08	5.10796e+08	6.74726e+08	9.07515e+08	1.46993e+08	1.45801e+08	6.74983e+08	5.40898e+08	1.49079e+08	3.98979e+09	6.86047e+08	7.5173e+08	1.22152e+09	6.06351e+08	1.36304e+08	1.54465e+08	1.62038e+08	5.70107e+08	1.51849e+08	6.13437e+08	1.43875e+08	4.44873e+08	9.06867e+08	1.54336e+08	1.41108e+08	7.0524e+08	1.36075e+08	1.61109e+08	5.81952e+08
22	M82T577	81.5205	577.016	9.62	5.4256e+08	7.58339e+08	1.94576e+08	2.14444e+08	3.74523e+09	2.04835e+08	6.48468e+08	2.20415e+08	6.39576e+08	2.24104e+08	2.16442e+08	6.40015e+08	2.28589e+08	2.21279e+08	6.12562e+08	2.17973e+09	1.64277e+09	5.86913e+08	1.50579e+09	9.8614e+08	1.11601e+09	6.44794e+08	6.79425e+08	6.68932e+08	2.15105e+08	1.58387e+09	2.38855e+09	3.76431e+09	1.79706e+09
23	M82T76	82.0141	76.3404	1.27	5.28295e+09	5.86794e+09	5.78617e+09	5.39957e+09	6.08726e+09	5.94182e+09	6.51962e+09	6.43042e+09	6.54889e+09	6.29848e+09	6.07766e+09	6.40135e+09	5.71374e+09	5.69061e+09	5.73008e+09	5.90634e+09	5.56368e+09	5.91943e+09	6.73538e+09	6.91292e+09	6.95051e+09	7.30393e+09	6.89129e+09	7.59107e+09	6.26382e+09	6.33497e+09	6.57212e+09	6.50478e+09	6.30848e+09
24	M82T48	82.0143	47.5317	0.79	3.34689e+07	3.66182e+07	3.93011e+07	1.09327e+08	1.08899e+08	1.03346e+08	4.00563e+07	5.26327e+07	1.08775e+08	6.29427e+07	1.05458e+08	4.47986e+07	1.02551e+08	1.03831e+08	1.15202e+08	9.03348e+07	1.3521e+08	1.06504e+08	1.05913e+08	1.05732e+08	5.19802e+07	1.02406e+08	5.19066e+07	2.79241e+07	1.12442e+08	3.71789e+07	3.76337e+07	3.85422e+07	4.36853e+07
25	M82T60	82.0142	60.1058	1	5.64023e+07	4.60561e+07	5.88988e+07	1.33629e+07	1.37037e+07	5.82196e+07	6.90371e+07	4.31817e+07	1.39722e+07	1.58169e+07	1.55766e+07	5.6517e+07	1.5424e+07	1.4584e+07	1.34229e+07	4.57891e+06	1.46864e+07	1.30052e+07	1.58658e+07	1.40073e+07	6.00338e+07	1.49238e+07	4.81036e+07	1.41437e+07	1.32209e+07	7.85978e+07	5.92525e+07	1.01552e+08	5.28255e+06
26	M82T316	82.014	315.608	5.26	3.89615e+07	1.37334e+08	9.35767e+06	4.41589e+07	3.65062e+07	4.96451e+07	1.06235e+07	5.2787e+07	1.03965e+07	1.01118e+07	1.15137e+07	3.35663e+07	3.21389e+07	9.3391e+06	9.53747e+06	1.05767e+07	4.44557e+07	2.75287e+07	4.01745e+07	2.10765e+07	2.9319e+07	7.02597e+07	2.41429e+07	2.61581e+07	3.25149e+07	1.02918e+07	9.48223e+06	2.95078e+07	6.88528e+07
27	M82T329	82.0139	328.572	5.48	4.7939e+07	1.03907e+07	9.81254e+06	2.9975e+07	4.03754e+07	9.53988e+06	8.84765e+06	3.09273e+07	1.49917e+08	1.04707e+07	1.11787e+07	4.08237e+07	2.81072e+07	2.7584e+07	1.11974e+07	1.01192e+07	2.41708e+07	3.23963e+07	1.01648e+07	1.89563e+07	4.16836e+07	9.46055e+06	2.98849e+07	4.2474e+07	4.63514e+07	3.74486e+07	8.69665e+06	2.80376e+07	9.43054e+06
28	M82T355	82.014	355.221	5.92	1.6203e+07	7.37864e+07	4.74618e+07	1.02041e+08	3.29042e+07	7.48404e+07	1.51576e+07	2.57096e+07	1.64074e+07	1.68967e+07	1.59037e+07	1.54084e+07	1.15082e+08	2.0019e+07	3.97496e+07	1.65163e+07	3.52291e+07	3.8065e+07	1.7028e+07	4.51997e+07	5.2842e+07	1.75727e+07	6.18412e+07	6.16532e+07	4.30311e+07	9.02568e+07	1.52557e+07	6.2423e+07	3.8033e+07
29	M82T295	82.0138	294.536	4.91	1.20562e+07	3.22881e+07	9.29751e+07	7.3326e+07	1.09987e+07	5.43612e+07	1.25462e+07	4.124e+07	1.15525e+07	1.21755e+07	1.26066e+07	1.23186e+07	3.9457e+07	6.01137e+07	1.22236e+07	1.27665e+07	3.83601e+07	6.28663e+07	5.58877e+07	4.75917e+07	4.61661e+07	3.11929e+07	4.6589e+07	1.41008e+08	1.1685e+07	1.20071e+07	1.18896e+07	3.7671e+07	2.89389e+07
30	M82T95	82.0371	95.1523	1.59	1.07137e+08	5.94254e+07	6.49541e+07	6.50184e+07	6.46207e+07	6.51899e+07	6.20142e+07	5.67101e+07	5.64821e+07	8.5826e+07	6.7819e+07	2.8883e+07	2.71348e+07	5.13694e+07	4.03643e+07	2.61773e+07	7.91486e+07	2.31113e+07	6.30063e+06	3.47951e+07	2.82244e+07	2.96997e+07	5.13862e+06	3.44548e+07	9.71236e+06	1.00678e+08	4.5162e+07	4.10306e+07	5.50904e+07
31	M82T103	82.0371	102.848	1.71	1.26018e+07	4.20609e+07	4.77184e+07	9.75505e+06	9.74564e+06	4.09822e+07	9.73243e+06	2.76582e+07	2.74518e+07	1.10489e+07	3.56217e+07	3.41268e+07	3.45533e+07	9.5518e+06	9.38177e+06	9.50443e+06	9.13434e+06	3.43329e+07	6.21285e+06	2.44455e+07	9.57543e+06	4.01206e+07	6.38805e+06	8.01987e+06	8.68708e+06	1.18879e+07	1.01409e+07	3.19155e+07	2.98409e+07
32	M83T76_1	82.5374	76.2915	1.27	5.31529e+09	5.46416e+09	5.37401e+09	5.49368e+09	5.89895e+09	5.7446e+09	6.1862e+09	5.99745e+09	6.15197e+09	5.8286e+09	5.90028e+09	6.06247e+09	4.98895e+09	5.34482e+09	5.19906e+09	5.34301e+09	4.92331e+09	5.0705e+09	5.95303e+09	5.85683e+09	6.19558e+09	6.19782e+09	5.87622e+09	6.28834e+09	6.03136e+09	6.09077e+09	6.16041e+09	6.03444e+09	5.60489e+09
33	M83T60	82.5374	59.9243	1	1.09355e+08	7.71663e+07	7.62779e+07	1.92521e+07	1.07203e+08	6.37822e+07	9.45562e+07	6.25209e+07	7.93492e+07	1.9692e+07	7.04695e+07	8.10633e+07	1.91892e+07	6.37224e+07	1.94966e+07	6.43993e+07	1.87686e+07	7.90785e+07	7.1168e+07	7.45535e+07	7.05635e+07	7.40662e+07	7.18212e+07	3.71953e+07	1.50258e+07	3.35506e+07	8.99724e+07	9.15732e+07	1.69824e+07
34	M83T40	82.5374	40.218	0.67	7.00523e+07	4.74515e+07	4.87894e+07	1.85571e+08	1.75252e+07	1.52428e+07	6.38473e+07	6.2231e+07	6.4601e+07	1.63142e+08	6.79868e+07	6.8913e+07	1.55609e+07	5.83453e+07	1.48115e+08	4.62299e+07	1.546e+07	4.21852e+07	1.55232e+07	3.47942e+07	3.57769e+07	4.26143e+07	3.44525e+07	4.68588e+07	1.16513e+07	3.47139e+07	1.50774e+07	5.65995e+07	1.4561e+08
35	M83T35	82.5374	35.0388	0.58	7.84913e+06	7.49423e+06	9.30709e+06	8.34546e+06	5.47117e+07	2.40574e+07	9.16259e+06	4.03285e+07	9.24545e+06	8.09202e+06	7.58038e+06	2.291e+07	8.98869e+06	4.37319e+07	7.07622e+06	1.7214e+07	4.56334e+07	1.34286e+07	3.18434e+07	7.29548e+06	3.37716e+07	7.7856e+06	4.62953e+07	1.72768e+07	4.78192e+07	3.7237e+07	4.73984e+07	7.92065e+06	7.09851e+06
36	M83T640	82.5375	640.038	10.67	3.00634e+07	3.24351e+07	2.29709e+08	1.34404e+08	4.78572e+08	3.31194e+07	1.54255e+08	2.88462e+07	1.80596e+08	1.00572e+08	1.27672e+08	8.56748e+07	1.17366e+08	2.94756e+07	1.97946e+08	3.05739e+07	3.0896e+07	2.74284e+07	2.80356e+07	2.78182e+07	1.51535e+08	8.56516e+07	2.70721e+07	2.57212e+07	3.8373e+08	8.53066e+07	1.3799e+08	9.65949e+07	2.98447e+07
37	M83T584	82.5375	584.058	9.73	2.77391e+07	3.11523e+07	2.81062e+07	8.80764e+07	1.02076e+08	9.99781e+07	3.05717e+07	1.04317e+08	2.7836e+07	3.05783e+07	2.86784e+07	1.20704e+08	2.86983e+07	2.68183e+07	1.00236e+08	3.22776e+07	7.84208e+07	1.54099e+08	9.82444e+07	2.76931e+07	1.24452e+08	4.15176e+08	1.40906e+08	2.5002e+07	1.20927e+08	2.63475e+07	1.0233e+08	1.12126e+08	2.7085e+07
38	M83T566	82.5375	565.726	9.43	2.28264e+07	2.45346e+07	8.22114e+07	8.91713e+07	1.53564e+08	1.26342e+08	1.52894e+08	2.4845e+07	2.62685e+07	1.18068e+08	8.5343e+07	1.61984e+08	8.6121e+07	2.62979e+07	8.39372e+07	2.53129e+07	2.02912e+08	2.58341e+07	2.6509e+07	8.44399e+07	2.47048e+07	2.39057e+07	8.98964e+07	1.12799e+08	2.34565e+07	9.20672e+07	8.68349e+07	7.97973e+07	8.3576e+07
39	M83T76_2	83.0149	76.3404	1.27	6.74876e+08	7.57046e+08	7.5709e+08	6.76506e+08	7.65182e+08	7.63086e+08	8.35223e+08	8.15853e+08	8.30548e+08	8.24986e+08	7.89333e+08	7.95262e+08	7.26682e+08	7.45514e+08	7.41256e+08	7.36965e+08	6.96576e+08	7.43858e+08	8.20397e+08	8.95121e+08	8.70366e+08	9.32713e+08	8.97289e+08	9.49691e+08	8.19635e+08	8.12756e+08	8.34972e+08	8.15731e+08	8.09426e+08
40	M83T76_3	83.0383	76.3404	1.27	1.23439e+09	1.28959e+09	1.27922e+09	1.26531e+09	1.35053e+09	1.34142e+09	1.4045e+09	1.39177e+09	1.38895e+09	1.35661e+09	1.34213e+09	1.38814e+09	1.20385e+09	1.28274e+09	1.22804e+09	1.24048e+09	1.15646e+09	1.25903e+09	1.34075e+09	1.35487e+09	1.46954e+09	1.48525e+09	1.44101e+09	1.46588e+09	1.43526e+09	1.33245e+09	1.4663e+09	1.41147e+09	1.33933e+09
41	M83T93	83.0494	93.4208	1.56	8.31769e+07	9.374e+07	8.43936e+07	8.73658e+07	8.70317e+07	8.5814e+07	7.54436e+07	3.69844e+08	3.25068e+08	3.42577e+08	3.9947e+08	3.23628e+08	3.69595e+08	3.70141e+08	3.46081e+08	3.47848e+08	3.66432e+08	3.29028e+08	3.81913e+08	3.82137e+08	4.16764e+08	3.49883e+08	3.8012e+08	3.32452e+08	3.83456e+08	3.68092e+08	3.50643e+08	3.11099e+08	3.29338e+08
42	M83T103	83.0495	102.81	1.71	2.02208e+08	1.87427e+08	2.26819e+08	2.1355e+08	2.16921e+08	1.96337e+08	9.84029e+08	4.09002e+08	3.77763e+08	3.76733e+08	4.54263e+08	4.00631e+08	3.44208e+08	3.80939e+08	3.98388e+08	3.55197e+08	3.7377e+08	3.58501e+08	4.30791e+08	3.91889e+08	5.21687e+08	3.88325e+08	4.48556e+08	4.24244e+08	3.66515e+08	3.66665e+08	4.11885e+08	3.19314e+08	3.43947e+08
43	M83T147	83.0495	146.835	2.45	9.98205e+07	7.14052e+07	9.77637e+07	6.93947e+07	1.41411e+08	8.60979e+07	1.12567e+08	2.07931e+08	9.11182e+07	9.84832e+07	3.12671e+08	1.30645e+08	1.23752e+08	4.1031e+07	2.23179e+08	1.30296e+08	3.8188e+07	1.23026e+08	4.36596e+07	4.96535e+07	4.4527e+07	4.57087e+07	1.95719e+08	1.7201e+08	1.31606e+08	1.28296e+08	2.06027e+08	1.39767e+08	2.66642e+08
44	M83T48	83.0384	47.5879	0.79	1.08798e+07	9.35919e+07	9.60024e+06	6.83199e+06	7.94373e+06	1.37777e+07	8.63425e+06	7.22751e+06	1.78266e+08	8.50924e+06	1.2057e+07	3.90923e+07	1.26952e+07	1.04813e+07	1.26114e+07	8.19998e+06	2.14276e+08	9.27973e+06	1.28008e+08	8.37225e+07	7.11787e+06	3.36141e+07	9.05009e+06	3.59187e+07	1.13691e+07	9.80567e+06	1.41795e+07	5.01365e+06	1.58408e+07
45	M83T36	83.0384	36.3061	0.61	9.86756e+06	5.70013e+06	7.84653e+06	1.47481e+07	7.268e+06	1.17675e+07	1.44959e+07	8.19087e+06	5.90913e+06	7.37292e+06	6.96077e+06	8.33963e+06	8.33723e+06	1.35404e+07	8.95766e+06	1.01261e+07	1.56796e+07	1.11723e+07	9.77621e+06	3.92503e+07	1.1712e+07	2.37033e+07	1.07692e+07	8.69009e+06	9.19053e+06	7.26357e+06	7.55408e+06	5.45689e+06	1.22003e+07
46	M83T61	83.0385	61.2434	1.02	1.52489e+07	1.4165e+07	1.63538e+07	2.03022e+07	1.70311e+07	2.04138e+07	1.28085e+07	1.58575e+07	1.823e+07	2.04008e+07	1.55421e+07	1.47953e+07	9.09045e+06	1.9035e+07	1.9349e+07	1.41369e+07	1.80625e+07	1.92565e+07	5.88311e+07	4.27137e+07	1.38714e+07	1.14455e+07	2.02127e+07	1.81906e+07	2.12032e+07	1.80904e+07	9.24088e+07	1.45218e+07	2.04896e+07
47	M83T119	83.0495	119.371	1.99	4.44366e+07	1.43859e+07	7.15618e+07	1.03289e+08	1.27701e+07	1.42344e+07	2.80491e+07	1.37822e+08	1.06289e+08	3.22308e+08	1.04196e+08	2.16725e+08	1.17256e+08	4.61436e+07	3.50123e+07	4.05803e+07	3.67283e+07	3.85116e+07	1.95324e+08	4.88364e+07	4.74019e+07	2.32014e+08	1.8846e+08	5.04942e+07	1.58904e+08	2.8913e+07	1.03456e+08	1.27177e+08	2.13098e+08
48	M83T171	83.0495	170.829	2.85	7.8359e+07	1.66549e+07	4.97666e+07	5.96363e+07	1.50675e+07	1.54678e+07	8.19879e+07	1.1549e+08	5.37848e+07	1.36249e+08	6.67376e+07	2.54948e+07	1.26936e+08	2.855e+07	9.10399e+07	2.54982e+07	2.5632e+07	2.57465e+07	3.0569e+07	3.4381e+07	9.9446e+07	3.00847e+07	2.96465e+07	1.05807e+08	5.66471e+07	1.07043e+08	1.62668e+08	8.77332e+07	1.20583e+08
49	M83T131	83.0495	131.135	2.19	4.92438e+07	1.6528e+07	9.19104e+07	5.97485e+07	1.62571e+07	1.74026e+07	7.58261e+07	1.32232e+08	1.54924e+08	2.5998e+07	2.72273e+07	1.28666e+08	2.1519e+08	3.85967e+07	1.48838e+08	3.14896e+07	3.25458e+07	4.14707e+08	3.93515e+07	4.3777e+07	2.3158e+08	1.58244e+08	3.93243e+07	1.68847e+08	1.24669e+08	1.18126e+08	2.96423e+07	8.17392e+07	9.32427e+07
50	M83T642	83.0608	641.626	10.69	2.88881e+08	5.91645e+07	3.43823e+08	6.03972e+07	7.479e+08	3.24522e+08	5.89313e+07	5.79595e+07	3.16223e+08	3.38878e+08	2.75575e+08	2.59275e+08	2.44362e+08	1.84035e+08	3.28474e+08	5.40529e+08	6.25162e+07	3.04571e+08	3.9598e+08	6.85457e+07	7.48395e+07	7.23518e+07	5.0096e+08	7.74337e+08	5.52286e+07	4.20657e+08	7.06486e+07	3.94647e+08	2.95051e+08
51	M83T649	83.0607	649.292	10.82	6.03344e+07	6.88444e+07	5.84887e+07	6.49471e+07	6.12309e+07	3.76978e+08	2.24238e+08	4.76168e+08	6.61324e+07	4.25519e+08	2.55303e+08	6.10465e+07	3.15537e+08	3.03698e+08	2.75933e+08	6.50268e+07	6.58135e+07	6.85937e+07	2.47273e+08	2.43705e+08	1.08304e+09	6.3743e+07	2.05166e+08	7.55476e+07	4.12812e+08	4.97685e+08	6.83633e+07	3.34295e+08	2.72353e+08
52	M83T748	83.0607	747.936	12.47	4.19014e+08	5.64107e+08	3.752e+08	2.30352e+08	1.0442e+08	2.53059e+08	3.62309e+08	4.16798e+08	8.30238e+08	3.9852e+08	1.00049e+08	3.03666e+08	4.06841e+08	1.00754e+08	5.79783e+08	3.26414e+08	4.15266e+08	1.15706e+08	8.47038e+08	2.22991e+09	4.55595e+08	1.12197e+08	1.03169e+08	4.37198e+08	3.29552e+08	1.08943e+08	5.61692e+08	1.49857e+09	7.79725e+08
53	M83T589	83.0606	589.092	9.82	6.15137e+07	6.61064e+07	5.92706e+07	6.85148e+07	2.66412e+08	6.89818e+07	2.5412e+08	1.04849e+09	6.37773e+07	3.82288e+08	5.49256e+07	1.85977e+08	5.90207e+07	2.32552e+08	5.78543e+07	5.34653e+08	3.67852e+08	7.13203e+07	2.61551e+08	2.7883e+08	5.82903e+07	6.08047e+07	6.72718e+08	3.49349e+08	2.98354e+08	3.14774e+08	2.94834e+08	1.99934e+08	3.33293e+08
54	M83T828	83.0605	827.939	13.8	6.21662e+08	1.19454e+08	3.95124e+08	3.70639e+08	8.56925e+08	1.1328e+08	1.22724e+08	1.55035e+09	2.10657e+09	1.83998e+09	4.43983e+08	1.21385e+08	1.21085e+08	3.15003e+08	2.00837e+09	6.00523e+08	1.92879e+09	4.8974e+08	4.06261e+08	4.17788e+08	8.47434e+08	5.54717e+08	3.60869e+08	4.67281e+08	2.61174e+09	3.99295e+08	3.35827e+08	1.70865e+09	3.85908e+08
55	M83T716	83.0606	715.618	11.93	2.85684e+08	7.79921e+07	2.64e+08	7.99887e+07	6.79766e+07	3.12102e+08	6.79172e+07	5.68381e+08	2.34311e+08	6.93999e+07	5.11905e+08	7.47775e+07	6.62721e+07	9.07241e+07	4.21671e+08	3.55454e+08	8.88408e+07	3.77837e+08	7.86126e+07	6.54705e+07	3.99563e+08	3.3834e+08	3.27452e+08	3.11437e+08	5.29665e+08	9.36971e+07	8.35202e+07	2.55008e+08	3.48162e+08
56	M83T677	83.0608	676.912	11.28	6.75969e+08	3.07135e+08	7.31686e+08	9.12748e+07	4.54128e+08	5.77486e+08	3.8816e+08	3.76588e+08	4.31139e+08	8.26883e+07	4.35977e+08	9.10571e+07	3.57745e+08	6.97909e+08	3.28134e+08	5.27917e+08	6.68024e+08	2.82648e+08	9.08489e+07	3.53176e+08	3.68344e+08	3.31172e+09	3.44665e+08	1.03772e+08	2.46359e+08	4.42369e+08	3.82659e+08	5.15393e+08	4.65764e+08
57	M83T600	83.0606	600.474	10.01	2.56667e+08	7.51289e+08	2.87392e+08	1.35572e+09	4.36688e+08	8.82588e+07	1.89547e+08	2.79564e+08	8.21204e+07	2.03014e+08	4.0279e+08	2.63108e+08	2.92201e+08	3.0003e+08	3.79464e+08	4.03075e+08	3.51854e+08	1.50968e+09	2.87783e+08	7.5911e+08	3.69418e+08	4.56797e+08	9.49181e+07	3.6279e+08	1.98935e+08	2.42261e+08	2.8066e+08	2.98134e+08	2.91401e+08
58	M83T657	83.0607	656.515	10.94	3.20992e+08	7.35395e+07	2.50084e+08	6.63772e+07	2.80358e+08	7.32666e+07	3.29783e+08	6.39835e+07	5.13497e+08	6.83183e+07	2.50685e+08	7.23272e+07	2.36525e+08	4.57236e+08	2.78111e+08	3.14674e+08	7.24574e+08	4.53837e+08	3.08598e+08	6.78766e+07	8.70187e+07	7.61766e+07	2.91532e+08	8.33475e+07	7.01223e+07	1.115e+08	8.84349e+08	2.94908e+08	3.23195e+08
59	M83T687	83.0607	686.852	11.45	2.72438e+08	2.74065e+08	5.78191e+07	2.1752e+09	4.90602e+08	6.78281e+07	5.8766e+07	3.89757e+08	2.46161e+08	5.81869e+07	3.19755e+08	3.43066e+08	7.14422e+07	7.28167e+07	4.61899e+08	6.16126e+07	4.42148e+08	4.48037e+08	3.82105e+08	4.03265e+08	4.92741e+08	1.27667e+08	6.10475e+07	6.63433e+07	2.80753e+08	3.12326e+08	2.59253e+08	5.02988e+07	2.58455e+08
60	M83T521	83.0606	521.181	8.69	2.47693e+08	5.23031e+07	2.51115e+08	5.89618e+07	5.83168e+07	1.72931e+08	1.94811e+08	4.37917e+08	6.1622e+07	5.09086e+08	2.5828e+08	5.01458e+07	5.16586e+07	1.67828e+08	3.39892e+08	6.03472e+07	2.66447e+08	1.68991e+08	6.88444e+07	6.11993e+07	5.91049e+07	6.5247e+07	5.96043e+07	5.12139e+07	9.6052e+08	2.51013e+08	2.61471e+08	6.02109e+07	2.2042e+08
61	M83T624	83.0606	623.913	10.4	2.8309e+08	8.13724e+07	1.74419e+08	7.47393e+07	7.78539e+07	5.34694e+08	2.45745e+08	7.85997e+08	3.22989e+08	8.11134e+07	3.38614e+08	2.62818e+08	2.45263e+08	2.52898e+08	6.02232e+08	4.11929e+08	2.40007e+08	7.38631e+07	8.11768e+07	2.40798e+08	8.51927e+07	2.89559e+08	6.20286e+08	3.54028e+08	7.19822e+07	2.59631e+08	2.55435e+08	2.69204e+08	2.54139e+08
62	M83T559	83.0606	559.169	9.32	6.07116e+07	2.55308e+08	2.48065e+08	1.58474e+08	2.60443e+08	5.64205e+07	2.35541e+08	5.94701e+07	5.20953e+07	2.5241e+08	5.61616e+07	6.3755e+07	2.28347e+08	2.21817e+08	4.88054e+07	5.80695e+07	3.72084e+08	5.80184e+08	6.2618e+08	3.58833e+08	3.75476e+08	2.94321e+08	2.34256e+08	7.05173e+08	1.63117e+08	3.6374e+08	1.97399e+08	2.03981e+08	5.95406e+07
63	M83T707	83.0606	707.205	11.79	8.45074e+07	1.00929e+09	5.38353e+08	8.41822e+07	2.56558e+08	8.25086e+07	6.04092e+08	4.67053e+08	3.26063e+08	8.58511e+07	7.08101e+07	4.35754e+08	3.84375e+08	1.3288e+09	3.07882e+08	2.45586e+08	1.20126e+09	9.26615e+07	1.04272e+08	1.10992e+08	1.16021e+08	1.0945e+08	8.30113e+07	9.42644e+07	7.99461e+07	4.68297e+08	4.93538e+08	3.61455e+08	3.56126e+08
64	M83T542	83.0606	542.285	9.04	5.62272e+07	7.27578e+08	5.32222e+07	1.92551e+08	2.93004e+08	5.80605e+07	2.90864e+08	1.86951e+08	6.17325e+07	2.32338e+08	5.49435e+07	6.91274e+07	7.49565e+08	3.72643e+08	4.73468e+08	5.78314e+07	2.97837e+08	6.64919e+07	6.20062e+07	3.84029e+08	3.79166e+08	2.64079e+08	1.9007e+08	1.67807e+08	5.34589e+07	6.47922e+07	1.72329e+08	5.22273e+07	3.05958e+08
65	M83T735	83.0608	734.739	12.25	5.4565e+08	4.22303e+08	2.92015e+08	9.84996e+07	9.63183e+07	4.94858e+08	3.43903e+08	4.88471e+08	9.69952e+07	9.75551e+07	3.54031e+08	3.80364e+08	4.80297e+08	4.39473e+08	5.49742e+08	4.10355e+08	5.88911e+08	4.17742e+08	1.19473e+08	1.20455e+08	6.69901e+08	7.74686e+08	1.02578e+08	3.57513e+08	7.3101e+08	1.87426e+09	5.48164e+08	1.00096e+08	4.21758e+08
66	M83T615	83.0606	614.593	10.24	2.36606e+08	8.65649e+07	2.6099e+08	7.49407e+07	4.98511e+08	6.94763e+07	2.70997e+08	7.30986e+07	3.78844e+08	4.53483e+08	7.89524e+07	3.03231e+08	2.61189e+08	4.35655e+08	7.34252e+07	1.75382e+08	3.37838e+08	8.75756e+07	5.96572e+08	7.77253e+07	7.15578e+07	3.29012e+08	8.50311e+07	8.26566e+07	9.77779e+08	3.05485e+08	2.39869e+08	2.28311e+08	8.49564e+07
67	M83T784	83.0608	784.351	13.07	4.92651e+08	1.1153e+08	1.08355e+08	5.34567e+08	1.09609e+08	2.61639e+09	3.43806e+08	5.6657e+08	1.03401e+08	4.02675e+08	6.12673e+08	4.28126e+08	9.97955e+07	4.3658e+08	9.54259e+07	1.87065e+09	5.1887e+08	5.82051e+08	4.19471e+08	3.29767e+08	1.10845e+08	3.04775e+08	4.52836e+08	4.35868e+08	1.01273e+08	4.6361e+08	3.74764e+08	3.80518e+08	6.8181e+08
68	M83T666	83.0608	665.664	11.09	7.65856e+07	3.19092e+08	3.00402e+08	7.55399e+07	7.72879e+07	4.1697e+08	2.55247e+08	4.13855e+08	2.24645e+08	6.57693e+07	3.98786e+08	4.15997e+08	3.3943e+08	8.52843e+07	3.3208e+08	7.75544e+07	8.3761e+07	8.09978e+07	3.6644e+08	3.81234e+08	8.75843e+07	1.15797e+08	2.37784e+08	4.26736e+08	6.23094e+08	6.49907e+08	8.74475e+07	2.65446e+08	8.03026e+07
69	M83T698	83.0607	698.312	11.64	2.23163e+08	8.83659e+07	9.00382e+07	8.91046e+07	8.50166e+07	5.57648e+08	4.73145e+08	8.7964e+07	2.63772e+08	2.05158e+09	3.5863e+08	5.57708e+08	3.87156e+08	1.10515e+08	3.75862e+08	4.83856e+08	9.88861e+07	4.80302e+08	3.84756e+08	2.43185e+08	5.65067e+08	1.42407e+08	2.64907e+08	7.50706e+08	7.76347e+07	3.6691e+08	2.64913e+08	2.56899e+08	3.57743e+08
70	M83T532	83.0608	532.183	8.87	5.14416e+07	4.57543e+07	3.66087e+08	4.71843e+07	2.08247e+08	1.38959e+08	1.94776e+08	5.16965e+07	1.38926e+09	3.86796e+07	2.37561e+08	4.71672e+07	4.33147e+07	4.89572e+07	4.86843e+07	5.22414e+07	1.97018e+08	2.08851e+08	5.61475e+07	4.69929e+07	5.32352e+07	2.53438e+08	3.79248e+08	2.02149e+08	4.01277e+07	2.15612e+08	1.96865e+08	2.47702e+08	4.38212e+07
71	M83T578	83.0606	578.393	9.64	6.1354e+07	3.04102e+08	2.47173e+08	6.51089e+07	2.15555e+08	1.56172e+09	3.32251e+08	6.74787e+07	8.85274e+08	2.2866e+08	1.18414e+09	6.76147e+07	3.42039e+08	6.20822e+07	2.46767e+08	6.84428e+07	2.28995e+08	6.40134e+07	7.38248e+07	2.07875e+08	4.79745e+08	7.87403e+07	7.44229e+07	6.7221e+07	2.00159e+08	2.61364e+08	2.82465e+08	2.77061e+08	7.09897e+08
72	M83T759	83.0608	759.158	12.65	2.89676e+08	8.75088e+08	3.46234e+08	4.93026e+08	1.09104e+08	1.12092e+08	4.26898e+08	1.01154e+08	1.0496e+08	4.12819e+08	3.30253e+08	4.37086e+08	4.2838e+08	6.04077e+08	3.37583e+08	1.02445e+08	3.8864e+08	4.65941e+08	1.23398e+08	1.13235e+08	5.39518e+08	5.13694e+08	1.50466e+09	7.0511e+08	4.35141e+08	9.85577e+07	5.01652e+08	1.10315e+08	1.13328e+08
73	M83T506	83.0608	505.511	8.43	1.83719e+08	3.58493e+08	1.99562e+08	7.34188e+07	6.43707e+07	7.52613e+07	2.19658e+08	2.40833e+08	7.51961e+07	6.47751e+07	5.08823e+08	2.13369e+08	1.60701e+08	4.40488e+08	7.27151e+07	8.05403e+07	5.09181e+08	6.96045e+07	7.64578e+07	7.06721e+08	8.79607e+08	1.86724e+08	1.83955e+08	2.82831e+08	6.45118e+07	2.58265e+08	2.53069e+08	4.93405e+08	3.483e+08
74	M84T34	83.5173	34.4588	0.57	1.08702e+07	3.58049e+06	2.97972e+06	3.0117e+06	3.03254e+06	3.37353e+06	2.83117e+07	1.35313e+07	1.32146e+07	1.74056e+07	3.36913e+06	4.02788e+06	1.06903e+07	1.01689e+07	3.16269e+06	2.9863e+06	3.46143e+06	3.62048e+06	1.74703e+07	3.12546e+07	2.41932e+07	3.41372e+06	1.70928e+07	3.60451e+06	1.55401e+07	3.81588e+06	9.83874e+06	1.04636e+07	3.09298e+07
75	M84T76_1	83.5362	76.3998	1.27	1.20492e+09	1.29121e+09	1.24918e+09	1.29999e+09	1.42557e+09	1.39995e+09	1.41249e+09	1.39679e+09	1.41494e+09	1.36067e+09	1.33395e+09	1.35953e+09	1.164e+09	1.27826e+09	1.24162e+09	1.27118e+09	1.22589e+09	1.18928e+09	1.43411e+09	1.39404e+09	1.52817e+09	1.49542e+09	1.44419e+09	1.62406e+09	1.42487e+09	1.3783e+09	1.40742e+09	1.42529e+09	1.31582e+09
76	M84T36	83.5362	36.4673	0.61	4.05759e+06	4.93094e+06	1.03482e+07	9.73177e+06	1.01968e+07	1.34063e+07	1.36529e+07	9.06622e+06	7.64615e+06	1.19759e+07	4.41211e+06	1.41008e+07	1.23889e+07	5.30193e+06	1.07008e+07	4.19719e+06	1.53391e+07	1.43873e+07	1.59921e+07	4.84566e+06	8.99821e+06	1.46714e+07	1.41736e+07	9.67581e+06	1.17884e+07	1.09589e+07	9.60571e+06	9.89472e+06	6.49721e+06
77	M84T48	83.5362	48.3181	0.81	2.99978e+06	4.15304e+07	6.92432e+06	1.30651e+07	1.00055e+07	1.5045e+07	9.11931e+06	7.88649e+06	1.02809e+07	1.25624e+07	2.98196e+06	1.07653e+07	8.31026e+06	3.75367e+07	7.35106e+06	3.28666e+06	1.07428e+07	1.13229e+07	8.73925e+06	3.20208e+06	7.47825e+06	3.15899e+06	3.12898e+06	3.37792e+06	3.03817e+06	6.45085e+06	1.37961e+07	1.06384e+07	8.98326e+06
78	M84T61	83.5362	61.0832	1.02	4.8021e+06	5.15271e+06	2.16234e+07	1.65807e+07	1.78325e+07	1.6214e+07	1.44451e+07	1.39643e+07	1.51503e+07	2.05911e+07	4.89788e+06	1.79998e+07	5.23795e+06	5.27466e+06	5.11959e+06	5.52868e+06	1.48747e+07	1.57388e+07	1.73084e+07	5.54854e+06	1.322e+07	1.34905e+07	5.08998e+06	4.97016e+06	1.358e+07	4.85822e+06	1.18382e+07	5.35238e+06	1.41349e+07
79	M84T76_2	84.0116	76.3998	1.27	7.23476e+08	8.00216e+08	7.66717e+08	7.35576e+08	8.36224e+08	8.18613e+08	8.74194e+08	8.9174e+08	9.08337e+08	8.91678e+08	8.6969e+08	8.69802e+08	8.15701e+08	8.22096e+08	8.19705e+08	8.20529e+08	7.83291e+08	8.12801e+08	8.77111e+08	9.42296e+08	9.23432e+08	9.94849e+08	9.22681e+08	1.03573e+09	9.20595e+08	8.87664e+08	8.97651e+08	9.14521e+08	8.62653e+08
80	M84T76_3	84.0378	76.3344	1.27	1.76631e+08	9.5554e+07	8.06064e+07	8.82994e+07	9.7654e+07	1.13248e+08	1.07272e+07	1.15111e+08	9.59453e+07	1.07806e+08	9.46661e+07	1.09549e+08	9.30212e+07	1.01998e+08	9.69539e+07	1.10674e+08	1.99147e+08	9.62124e+07	1.10733e+08	1.07352e+08	1.20566e+08	1.1697e+08	1.05688e+08	1.22538e+08	9.58143e+07	9.17971e+07	6.55015e+07	9.89034e+07	9.82925e+07
81	M84T92	84.0449	92.2189	1.54	8.30294e+08	8.6163e+08	8.36145e+08	8.35829e+08	8.41331e+08	8.93293e+08	1.84758e+09	1.67504e+09	1.33968e+09	1.4893e+09	1.38828e+09	1.67559e+09	1.81422e+09	1.96424e+09	1.76181e+09	1.92905e+09	2.17375e+09	1.76148e+09	1.6492e+09	1.63557e+09	1.76736e+09	1.63886e+09	1.71664e+09	1.72507e+09	1.59815e+09	1.61421e+09	1.60852e+09	1.57649e+09	1.59215e+09
82	M84T148	84.0449	148.369	2.47	2.21865e+08	2.17835e+08	2.08445e+08	2.10119e+08	1.7936e+08	2.35406e+08	2.82488e+08	2.4936e+08	2.61506e+08	2.95647e+08	2.49248e+08	3.65378e+08	2.6578e+08	3.45323e+08	3.14514e+08	3.08882e+08	3.47392e+08	2.4608e+08	1.95351e+08	2.50539e+08	2.36125e+08	2.34298e+08	2.18064e+08	2.92459e+08	2.35634e+08	2.52979e+08	2.56234e+08	2.3865e+08	2.68635e+08
83	M84T176	84.0449	175.77	2.93	2.72688e+08	1.87936e+08	2.72536e+08	2.3241e+08	2.53247e+08	2.79562e+08	5.4927e+08	3.21257e+08	7.22063e+07	3.51086e+08	7.49597e+07	4.2573e+08	3.26166e+08	4.44038e+08	3.18026e+08	3.79389e+08	5.64685e+08	4.11084e+08	7.47621e+07	3.56034e+08	3.50093e+08	3.40144e+08	2.15686e+08	5.75614e+08	3.20744e+08	4.76267e+08	3.01447e+08	2.71911e+08	2.79466e+08
84	M84T106	84.0447	105.633	1.76	1.61056e+08	3.02847e+08	2.74753e+08	3.06196e+08	2.76379e+08	2.33668e+08	1.53354e+08	4.60311e+08	8.24286e+07	3.38987e+08	2.99256e+08	5.73911e+08	4.00594e+08	3.23769e+08	4.79958e+08	4.19235e+08	9.75845e+07	5.37618e+08	3.77324e+08	3.75312e+08	2.84294e+08	4.81871e+08	1.71449e+07	4.26731e+08	2.80082e+08	3.11071e+08	3.34199e+08	3.72802e+08	2.95355e+08
85	M84T35	84.0641	35.0754	0.58	1.87977e+08	5.06567e+06	4.45824e+06	5.72425e+06	1.39157e+08	7.91801e+06	1.72217e+08	1.38193e+08	6.91727e+06	1.34412e+08	1.39153e+08	1.35492e+08	1.61229e+08	1.505e+08	1.52036e+08	1.5573e+08	1.58146e+08	6.4492e+06	1.74676e+08	1.68513e+08	5.58673e+06	7.19358e+06	5.33295e+06	5.57945e+06	5.35314e+06	4.9347e+06	6.162e+06	5.95527e+06	7.35767e+06
86	M84T32	84.0808	31.883	0.53	1.52911e+08	4.5963e+08	4.28896e+08	1.13325e+08	4.97446e+08	5.04934e+08	4.76705e+08	1.21345e+08	4.83087e+08	4.86893e+08	4.56066e+08	1.17752e+08	4.64604e+08	4.48899e+08	1.02032e+08	4.50411e+08	4.78998e+08	4.94574e+08	4.80074e+08	4.93842e+08	5.38513e+08	4.84341e+08	4.44545e+08	4.61389e+08	5.11169e+08	4.85947e+08	5.07059e+08	4.36342e+08	4.53886e+08
87	M84T147	84.0809	146.953	2.45	8.2541e+08	2.2277e+08	1.0089e+09	2.43391e+08	2.44873e+08	2.37019e+08	2.57153e+08	1.01257e+09	2.58569e+08	1.82585e+09	1.0249e+09	9.10944e+08	1.14195e+09	1.14674e+09	1.11773e+09	1.10228e+09	1.24607e+09	1.16779e+09	9.92202e+08	1.18753e+09	1.14682e+09	1.67892e+09	1.19984e+09	1.83153e+09	1.11602e+09	1.24066e+09	1.22083e+09	1.92393e+09	2.69514e+09
88	M84T275	84.0808	274.822	4.58	8.0695e+08	2.17507e+08	1.02126e+09	8.13979e+08	2.53147e+08	9.23059e+08	9.80557e+08	1.11854e+09	1.0615e+09	1.87963e+09	1.24324e+09	8.27395e+08	2.24739e+08	8.55565e+08	2.05175e+08	7.61245e+08	2.09876e+08	8.84564e+08	8.41944e+08	2.97089e+09	6.68351e+08	2.12767e+09	6.89403e+08	1.10895e+09	2.28689e+08	1.95022e+08	7.84588e+08	9.77725e+08	7.66878e+08
89	M84T333	84.0807	332.96	5.55	9.34506e+08	1.56098e+08	9.11981e+08	9.41331e+08	2.02119e+08	9.52716e+08	2.79115e+09	8.42979e+08	8.99361e+08	5.63668e+08	8.54611e+08	7.57886e+08	1.84033e+08	7.08609e+08	1.69026e+08	6.01849e+08	5.45826e+08	1.44239e+09	1.187e+09	6.24887e+08	1.4875e+09	5.80101e+08	7.32689e+08	6.78362e+08	6.47743e+08	2.19108e+09	5.98435e+08	7.28155e+08	6.89195e+08
90	M84T836	84.0806	835.522	13.93	3.25921e+08	9.70867e+07	3.46972e+08	4.05712e+08	8.59884e+07	8.35412e+07	5.13664e+08	4.14902e+08	9.26023e+07	7.12129e+08	4.37147e+08	2.92465e+08	8.45944e+07	8.66365e+07	3.82126e+08	9.20654e+07	1.89897e+09	4.90988e+08	8.43828e+07	7.78031e+07	4.08379e+08	4.38841e+08	7.25e+08	9.0948e+07	3.4384e+08	3.92687e+08	8.8263e+07	6.26685e+08	7.39881e+08
91	M84T243	84.0808	243.22	4.05	2.44932e+08	2.36962e+08	1.13577e+09	9.26483e+08	2.0673e+08	5.8597e+08	1.38863e+09	6.98582e+08	2.09956e+08	4.6006e+08	8.8751e+08	1.16128e+09	1.97372e+08	2.14466e+09	2.53237e+08	1.05331e+09	2.29622e+08	8.59011e+08	7.08171e+08	1.26668e+09	9.88251e+08	5.77718e+08	8.04026e+08	1.05539e+09	7.99291e+08	1.05031e+09	1.02148e+09	6.09285e+08	1.02998e+09
92	M84T513	84.0808	512.618	8.54	3.67242e+08	8.24306e+07	3.34668e+08	4.96705e+08	7.72151e+07	7.36832e+07	4.66033e+08	5.6054e+08	4.1645e+08	7.50631e+07	7.46353e+07	6.75505e+07	8.81975e+07	3.19318e+08	8.86289e+08	4.89009e+08	3.25305e+08	8.11302e+07	4.52919e+08	4.0612e+08	7.77747e+07	3.70758e+08	3.43295e+08	1.34655e+08	4.00525e+08	4.07556e+08	4.99827e+08	4.93526e+08	3.02375e+08
93	M84T640	84.0807	639.886	10.66	4.44905e+08	9.25679e+07	3.84164e+08	3.70378e+08	1.00399e+08	3.56753e+08	6.97767e+08	2.94319e+08	2.97589e+08	8.95845e+07	4.96184e+08	7.36317e+08	9.67376e+07	1.00223e+08	2.4871e+08	3.62661e+08	4.31029e+08	2.38453e+08	9.35761e+07	9.5727e+07	4.04524e+08	3.19458e+08	3.2228e+08	5.2888e+08	6.79712e+08	5.46453e+08	1.13226e+08	1.0607e+09	4.29404e+08
94	M84T528	84.0807	527.891	8.8	3.77198e+08	1.02998e+08	5.83457e+08	3.58908e+08	1.01109e+08	8.76466e+08	3.67171e+08	4.96218e+08	9.8752e+07	4.15866e+08	4.08347e+08	4.69265e+08	9.842e+07	3.60355e+08	4.02572e+08	3.32755e+08	4.10125e+08	9.67459e+07	5.37092e+08	9.61649e+07	9.80987e+07	4.82812e+08	5.21237e+08	3.9099e+08	8.86239e+07	3.74138e+08	3.04821e+08	8.40492e+08	1.30492e+09
95	M84T352	84.0808	351.777	5.86	5.09225e+08	1.41383e+08	1.35256e+08	6.24229e+08	1.44095e+08	6.08387e+08	1.37911e+08	5.59662e+08	6.60041e+08	7.02863e+08	5.54105e+08	6.89905e+08	1.45033e+08	7.8037e+08	1.41165e+08	7.08518e+08	4.47406e+08	3.9109e+08	4.42523e+08	4.81987e+08	1.34517e+08	5.49455e+08	8.12422e+08	6.8168e+08	1.52028e+09	1.42813e+08	6.76869e+08	8.02577e+08	7.36915e+08
96	M84T538	84.0807	537.686	8.96	4.28712e+08	1.0253e+08	5.10616e+08	3.39939e+08	9.42871e+07	9.20244e+07	8.92049e+07	3.79154e+08	1.0246e+09	4.628e+08	4.57357e+08	4.16969e+08	9.45092e+07	7.86205e+07	7.46729e+08	8.07001e+07	8.11321e+07	3.58656e+08	3.99225e+08	4.88062e+08	1.48845e+09	7.93359e+07	8.82452e+07	4.3848e+08	9.37522e+08	4.84737e+08	3.16752e+08	3.18847e+08	8.38677e+07
97	M84T265	84.0808	265.298	4.42	7.11563e+08	1.97091e+08	8.7969e+08	6.96366e+08	1.99407e+08	1.24724e+09	7.02739e+08	7.84107e+08	9.95829e+08	1.96304e+08	7.30784e+08	5.4921e+08	1.69941e+08	1.79469e+08	1.9498e+08	6.70209e+08	1.40233e+08	1.10651e+09	7.6944e+08	1.89064e+08	1.6667e+08	1.71733e+08	8.63402e+08	1.83086e+08	2.43386e+09	1.11491e+09	1.0117e+09	1.03867e+09	5.14124e+08
98	M84T229	84.0808	229.17	3.82	2.44324e+08	2.41845e+08	6.29532e+08	7.92672e+08	2.38908e+08	5.67071e+08	1.94622e+09	9.24707e+08	4.42672e+09	1.07787e+09	6.5402e+08	1.40575e+09	2.37022e+08	2.28892e+08	2.28875e+08	6.38954e+08	5.40351e+09	5.88678e+08	9.34448e+08	6.37787e+08	2.37929e+08	1.24841e+09	1.04475e+09	2.36761e+08	5.93281e+08	8.21765e+08	1.14076e+09	6.94548e+08	1.15129e+09
99	M84T305	84.0807	305.488	5.09	6.67872e+08	1.91077e+08	1.73592e+08	7.78575e+08	1.81938e+08	1.32678e+09	2.03905e+08	1.85875e+08	1.98847e+08	1.92037e+08	9.71255e+08	9.12158e+08	1.80629e+08	1.71605e+08	1.91938e+08	1.78384e+08	7.08707e+08	1.96586e+08	2.2583e+09	8.09657e+08	8.21249e+08	7.15768e+08	8.5885e+08	6.03451e+08	8.838e+08	2.0327e+08	9.02469e+08	9.00421e+08	6.36341e+08
100	M84T720	84.0806	719.679	11.99	3.07975e+08	9.63225e+07	8.47466e+07	7.13818e+08	9.23037e+07	4.10884e+08	3.11771e+08	3.40402e+08	1.06447e+08	8.61054e+07	3.03883e+08	8.04555e+08	8.91112e+07	4.21371e+08	5.59823e+08	9.82547e+08	5.79265e+08	4.40811e+08	9.27619e+07	4.91836e+08	8.59948e+07	2.34031e+08	2.95322e+08	3.14581e+08	4.60407e+08	4.46081e+08	6.30251e+08	8.81473e+07	8.93905e+08
101	M84T256	84.0808	256.144	4.27	3.25571e+09	2.08269e+08	1.0261e+09	1.97869e+09	2.25755e+08	5.61057e+08	2.11823e+08	8.86166e+08	2.22926e+08	9.30648e+08	9.84364e+08	6.79533e+08	2.32625e+08	6.14292e+08	2.34332e+08	1.33607e+09	2.10023e+08	2.11536e+08	7.01645e+08	9.51749e+08	8.35049e+08	7.18459e+08	9.63541e+08	8.04546e+08	2.20534e+08	1.59654e+09	1.14692e+09	6.80033e+08	7.53391e+08
102	M84T284	84.0807	284.308	4.74	1.31565e+09	2.04033e+08	1.58162e+08	8.98134e+08	1.92442e+08	8.90634e+08	6.68226e+08	2.05081e+08	1.2453e+09	1.73293e+08	7.79916e+08	6.17451e+08	1.94954e+08	1.96379e+08	1.91345e+08	7.40857e+08	3.13525e+09	8.41041e+08	1.04208e+09	2.13394e+08	6.02734e+08	1.91308e+08	7.90759e+08	7.67019e+08	1.04512e+09	1.07619e+09	1.06729e+09	9.29614e+08	1.07465e+09
103	M84T710	84.0807	710.208	11.84	3.40566e+08	9.49817e+07	6.60865e+08	5.22367e+08	9.2147e+07	5.50173e+08	4.36493e+08	9.63676e+07	1.57639e+09	1.20918e+09	4.1429e+08	9.42739e+07	9.42465e+07	9.40884e+07	4.35888e+08	9.20706e+07	3.15863e+08	8.73046e+07	1.29321e+09	2.91674e+08	7.05778e+08	3.65783e+08	3.3074e+08	4.57603e+08	2.99257e+08	3.86363e+08	2.91843e+08	1.51542e+09	9.1254e+07
104	M84T668	84.0807	667.602	11.13	7.09055e+08	1.07904e+08	7.19198e+08	4.15412e+08	1.14613e+08	3.83246e+08	4.0241e+08	3.88325e+08	3.73613e+08	1.53374e+09	1.00494e+08	6.02924e+08	1.03944e+08	9.67929e+07	1.00904e+08	4.98821e+08	4.32492e+08	1.00696e+08	1.06371e+08	9.88325e+08	2.98747e+08	4.07889e+08	3.84623e+08	1.11689e+08	9.77885e+07	5.36098e+08	3.92086e+08	3.50836e+08	5.73587e+08
105	M84T558	84.0807	558.09	9.3	1.29607e+08	1.13309e+08	3.28937e+08	2.79859e+08	1.28751e+08	1.18407e+08	1.24409e+08	4.15597e+08	1.02681e+08	1.23078e+08	3.75257e+08	3.11912e+08	1.08996e+08	1.48978e+09	1.09332e+09	1.69579e+09	4.61007e+08	1.12873e+08	4.80671e+08	1.20128e+08	3.32976e+08	4.56526e+08	1.02829e+08	9.15406e+08	5.73592e+08	5.19564e+08	1.1724e+08	4.42818e+08	1.09469e+08
106	M84T572	84.0808	572.202	9.54	3.63911e+08	1.17218e+08	5.75082e+08	3.66442e+08	1.1368e+08	1.09141e+08	3.80565e+08	1.15441e+08	4.64956e+08	8.62406e+08	1.21325e+08	9.25709e+07	1.05462e+08	1.06716e+08	1.08529e+08	1.06202e+08	3.11758e+08	4.5453e+08	4.00874e+08	3.01458e+08	1.05574e+08	6.10017e+08	8.46736e+08	1.13743e+08	7.6797e+08	1.12366e+08	9.45705e+08	1.0443e+08	4.06065e+08
107	M84T764	84.0807	764.292	12.74	9.70144e+07	9.34006e+07	9.11021e+07	5.90388e+08	9.81563e+07	4.71915e+08	4.18789e+08	4.60748e+08	5.95594e+08	1.06762e+08	3.11229e+08	2.84416e+08	8.33952e+07	4.97958e+08	7.47535e+08	9.7308e+07	1.07776e+08	9.68684e+07	3.9309e+08	1.04784e+08	3.56399e+08	5.94231e+08	6.70145e+08	4.14018e+08	1.00335e+08	4.08723e+08	9.71856e+07	4.36347e+08	8.79716e+07
108	M84T737	84.0807	736.553	12.28	5.93749e+08	8.94639e+07	7.33228e+08	3.4148e+08	1.05733e+08	5.03376e+08	3.45022e+08	5.05233e+08	8.7426e+07	9.91991e+07	5.69032e+08	5.82098e+08	8.53075e+07	5.60028e+08	3.13181e+08	4.36191e+08	3.97611e+08	8.707e+08	3.85721e+08	2.83847e+08	6.16535e+08	8.69507e+07	3.59745e+08	4.90111e+08	4.02998e+08	4.04468e+08	4.75541e+08	3.35903e+08	4.17467e+08
109	M84T296	84.0807	295.538	4.93	1.71043e+09	2.71912e+08	3.81456e+09	1.33802e+09	2.42674e+08	8.02386e+08	9.90654e+08	1.97406e+09	7.96687e+08	1.31787e+09	1.0897e+09	1.21307e+09	2.39e+08	1.61492e+09	2.37087e+08	1.17575e+09	2.18475e+08	5.85844e+08	8.95388e+08	1.00962e+09	6.76845e+08	1.18629e+09	7.67363e+08	6.87845e+08	7.24057e+08	1.05887e+09	1.27491e+09	1.00114e+09	5.59313e+08
110	M84T754	84.0807	754.331	12.57	3.06124e+08	1.36468e+08	8.82781e+08	3.32336e+08	1.09417e+08	5.66075e+08	1.20143e+08	2.40098e+08	8.38362e+08	1.21996e+09	1.05477e+08	3.90299e+08	1.285e+08	1.05824e+08	1.20781e+08	9.25425e+08	8.45985e+08	5.84077e+08	3.23629e+08	1.22633e+08	6.0616e+08	1.31291e+08	1.18868e+08	5.08979e+08	7.02531e+08	4.17814e+08	7.47501e+08	3.88425e+08	5.53373e+08
111	M84T689	84.0807	688.898	11.48	3.47331e+08	1.02751e+08	3.40419e+08	3.46101e+08	9.85726e+07	8.67588e+08	4.02022e+08	4.30045e+08	8.3179e+08	9.36067e+07	1.28042e+09	2.87238e+08	9.87885e+07	1.36247e+09	9.0647e+07	3.28319e+08	8.08958e+07	4.06914e+08	9.63498e+07	5.22887e+08	9.65911e+07	3.00449e+08	3.22344e+08	9.89661e+07	9.65652e+07	4.53455e+08	8.54716e+08	9.35544e+07	3.278e+08
112	M84T776	84.0807	775.817	12.93	3.95576e+08	1.19778e+08	9.45064e+08	5.16993e+08	1.04818e+08	3.57515e+08	3.103e+08	5.56151e+08	1.26262e+08	1.02603e+08	1.08393e+08	5.47984e+08	1.0794e+08	5.51559e+08	3.53789e+08	3.31817e+08	1.18522e+08	1.27555e+08	1.22212e+08	8.81295e+08	5.19254e+08	4.35219e+08	3.87157e+08	2.74317e+08	5.15364e+08	4.1835e+08	6.0974e+08	3.61606e+08	1.13458e+08
113	M84T216	84.0808	216.422	3.61	7.65812e+08	2.04358e+08	1.05414e+09	2.07195e+08	2.15497e+08	1.11612e+09	2.04227e+08	9.99071e+08	2.37608e+08	2.20235e+08	1.67602e+09	8.29386e+08	2.28452e+08	2.2845e+08	2.14397e+08	9.02041e+08	2.37819e+08	6.52103e+08	2.14162e+08	1.3717e+09	1.88795e+09	9.89612e+08	1.82005e+09	2.22202e+08	2.09217e+08	7.9487e+08	6.43077e+08	2.17112e+08	8.98809e+08
114	M84T466	84.0806	465.575	7.76	7.0345e+08	1.15718e+08	1.17314e+08	4.53182e+08	1.25548e+08	5.23185e+08	1.98714e+09	6.59875e+08	2.96998e+08	1.27717e+08	4.87757e+08	1.31622e+08	1.3145e+08	1.25218e+08	1.94455e+09	3.8547e+08	1.33072e+08	1.22631e+08	1.32122e+09	1.38134e+08	1.29467e+08	1.34067e+08	1.68433e+09	4.88728e+08	1.13801e+08	4.00971e+08	6.57106e+08	1.26377e+08	1.18221e+08
115	M84T499	84.0807	499.233	8.32	9.24363e+07	9.89046e+07	9.00153e+07	4.68368e+08	9.50654e+07	9.92823e+07	3.99273e+08	4.29637e+08	2.75686e+08	9.29145e+07	4.11286e+08	1.03697e+08	1.11475e+08	9.02386e+07	9.92224e+07	7.75114e+08	9.93964e+07	1.03005e+08	3.15879e+08	4.34981e+08	9.97164e+07	9.20169e+07	5.54939e+08	3.4849e+08	4.49263e+08	3.99043e+08	6.55292e+08	4.86005e+08	3.73938e+08
116	M84T316	84.0806	315.803	5.26	6.5762e+08	2.10626e+08	2.24762e+08	2.04563e+08	2.20172e+08	2.0383e+08	2.01755e+08	6.89166e+08	1.07517e+09	1.32838e+09	9.08364e+08	1.82662e+08	2.0882e+08	1.93798e+09	1.82051e+08	9.07394e+08	1.11849e+09	6.17446e+08	2.06174e+08	5.6863e+08	7.655e+08	7.26864e+08	1.29566e+09	8.8672e+08	2.11408e+08	9.8968e+08	9.76605e+08	6.91363e+08	7.24907e+08
117	M84T168	84.0808	168.349	2.81	1.82143e+08	1.89764e+08	9.90606e+08	1.96324e+08	1.92149e+08	9.55918e+08	1.99539e+08	8.93848e+08	1.62256e+09	2.28979e+09	1.8571e+08	5.51081e+08	1.82427e+08	7.40357e+08	1.68486e+08	8.67339e+08	1.01555e+09	1.26106e+09	5.79034e+08	9.84895e+08	9.05846e+08	6.63053e+08	1.67404e+08	1.01202e+09	9.23372e+08	7.17802e+08	8.17116e+08	1.88745e+08	1.70272e+08
118	M84T492	84.0806	491.641	8.19	5.31436e+08	7.50191e+07	7.66115e+07	3.51546e+08	7.56019e+07	4.36897e+08	6.7411e+07	3.48881e+08	4.7067e+08	6.51778e+07	3.59927e+08	7.13782e+07	7.19994e+07	4.94015e+08	7.0284e+07	3.80641e+08	7.61292e+07	8.5847e+07	6.96742e+08	3.71874e+08	7.29021e+07	5.27072e+08	6.38744e+07	3.03288e+08	4.32078e+08	7.65295e+07	3.4033e+08	4.08041e+08	7.53136e+08
119	M84T792	84.0806	791.877	13.2	3.16405e+08	1.4153e+08	4.81321e+08	3.21993e+08	1.22345e+08	4.91722e+08	3.19852e+08	7.14728e+08	6.23582e+08	4.84433e+08	6.53335e+08	4.40796e+08	1.19791e+08	7.96655e+08	5.33892e+08	4.33224e+08	9.98843e+08	1.18693e+09	1.26846e+08	1.31571e+08	3.64018e+08	3.17487e+08	4.85056e+08	3.65719e+08	5.88388e+08	6.93024e+08	4.57596e+08	4.93198e+08	2.06017e+09
120	M84T594	84.0807	594.308	9.91	1.12814e+08	1.1554e+08	9.00918e+08	3.52303e+08	1.20163e+08	1.22179e+08	3.58233e+08	1.31913e+08	4.60784e+08	6.63966e+08	1.76227e+09	5.58732e+08	1.14189e+08	5.76071e+08	3.80984e+08	9.51147e+08	3.05884e+08	4.07044e+08	1.36997e+09	1.16871e+08	5.99145e+08	8.10116e+08	1.091e+08	4.15043e+08	1.1868e+08	1.29095e+08	6.04738e+08	5.03868e+08	2.42404e+08
121	M84T389	84.0806	389.471	6.49	1.37123e+09	1.49356e+08	8.22152e+08	5.2439e+08	1.40335e+08	1.36252e+08	1.10701e+09	1.61957e+08	1.69316e+08	7.34443e+08	6.94845e+08	5.24394e+08	1.37588e+08	5.61132e+08	1.26292e+08	9.46638e+08	1.66398e+09	1.37277e+08	4.50197e+08	7.42826e+08	1.17379e+08	1.41269e+08	7.68329e+08	4.72937e+08	5.46876e+08	5.04923e+08	1.37936e+08	4.81716e+08	1.00964e+09
122	M84T369	84.0808	368.568	6.14	1.05114e+09	1.59009e+08	4.88583e+08	1.67024e+08	1.83774e+08	4.5308e+08	1.9746e+08	1.77819e+08	6.30688e+08	1.58191e+08	1.21123e+09	1.8774e+08	1.70724e+08	5.0981e+08	1.85244e+08	1.0964e+09	1.73426e+08	5.26241e+08	1.13734e+09	1.71424e+08	1.55138e+08	1.5437e+08	4.75896e+08	3.44301e+08	1.65758e+08	1.62583e+08	5.91452e+08	8.35024e+08	4.86991e+08
123	M84T606	84.0807	606.263	10.1	1.12831e+08	9.48601e+07	4.54518e+08	4.04139e+08	1.10925e+08	3.56574e+08	4.15213e+08	5.20345e+08	3.50589e+08	4.53456e+08	1.13523e+08	9.44361e+07	8.98993e+07	9.75755e+07	3.75067e+08	1.02941e+08	3.80381e+08	4.35437e+08	1.15377e+08	9.38108e+07	5.44755e+08	1.1039e+08	1.00265e+08	4.20074e+08	1.13639e+09	4.72098e+08	1.03197e+08	4.17412e+08	4.44373e+08
124	M84T615	84.0807	615.302	10.26	1.48402e+09	1.11548e+08	3.46461e+08	2.90628e+08	9.98119e+07	3.87355e+08	2.83477e+08	4.63579e+08	3.64085e+08	9.92758e+07	1.01607e+08	9.5505e+08	9.71195e+07	1.09711e+09	6.64863e+08	1.09882e+08	9.89018e+07	4.9443e+08	9.9989e+07	1.16255e+08	1.10863e+08	1.10864e+08	1.43628e+09	9.53176e+07	1.05823e+08	3.69919e+08	1.12594e+08	3.42883e+08	5.17758e+08
125	M84T651	84.0807	650.771	10.85	3.60683e+08	9.12296e+07	3.9305e+08	3.1795e+08	9.822e+07	9.12883e+07	9.34743e+07	8.19301e+07	4.29294e+08	8.53776e+07	3.71852e+08	9.30488e+07	8.15833e+07	1.68902e+09	4.567e+08	4.53502e+08	3.85001e+08	9.01023e+07	3.56776e+08	9.13267e+07	2.80203e+08	5.203e+08	8.37406e+07	2.58929e+08	5.02018e+08	9.73798e+07	4.69522e+08	8.95163e+07	9.51868e+07
126	M84T680	84.0807	679.501	11.33	8.44606e+07	9.22959e+07	4.30477e+08	2.78179e+08	9.68368e+07	3.25284e+08	4.84743e+08	4.32929e+08	8.72191e+07	8.77803e+07	8.62246e+07	8.1214e+07	8.66438e+07	7.84146e+07	5.10758e+08	3.36335e+08	4.13393e+08	3.77118e+08	4.25958e+08	7.50884e+07	3.35618e+08	3.45691e+08	2.8664e+08	8.62144e+08	8.56299e+07	4.83092e+08	8.38804e+07	8.90116e+07	4.35297e+08
127	M84T805	84.0808	804.958	13.42	3.86592e+08	8.97965e+07	3.24921e+08	1.08358e+08	1.05252e+08	8.78382e+08	4.13911e+08	3.20098e+08	9.10103e+07	9.46642e+07	9.21641e+07	4.18703e+08	1.05827e+08	1.0388e+08	5.27982e+08	4.12272e+08	1.13796e+08	3.05829e+08	1.55214e+09	9.14088e+07	7.98888e+08	5.87892e+08	1.0134e+08	4.53052e+08	8.49705e+07	4.27226e+08	6.88381e+08	4.22714e+08	8.70765e+07
128	M84T207	84.0808	207.11	3.45	2.53453e+08	2.4255e+08	2.47449e+08	1.33191e+09	2.35585e+08	1.33745e+09	2.62663e+08	2.41038e+08	2.504e+08	2.16413e+09	2.48713e+08	8.27545e+08	2.46961e+08	2.39042e+08	2.43428e+08	1.36638e+09	2.31774e+08	9.25683e+08	9.45367e+08	2.49315e+08	8.57195e+08	7.3996e+08	2.40709e+08	4.63656e+09	2.39371e+09	1.05574e+09	8.89566e+08	2.31524e+08	2.44092e+08
129	M84T404	84.0807	404.354	6.74	1.69385e+08	1.65698e+08	3.85001e+08	4.00197e+08	1.76977e+08	1.80932e+08	8.82261e+08	1.85069e+08	2.1894e+09	5.44861e+08	1.65932e+08	1.80159e+08	1.62978e+08	6.30256e+08	1.8503e+08	8.58567e+08	4.80164e+08	1.46351e+09	6.22105e+08	4.66436e+08	3.12428e+09	2.75976e+09	1.49346e+08	4.32599e+08	1.68269e+08	5.46214e+08	1.94114e+08	1.56964e+08	1.63035e+08
130	M84T421	84.0806	421.005	7.02	2.48237e+08	2.28559e+08	2.30688e+08	6.55909e+08	2.23601e+08	2.24249e+08	5.84141e+08	4.30512e+09	2.44418e+08	4.96125e+08	2.26011e+09	2.11943e+09	2.09778e+08	5.45349e+08	2.74951e+09	4.21037e+08	8.28826e+08	2.22304e+08	4.91733e+08	2.11352e+08	2.06929e+08	2.22395e+08	2.17134e+08	4.03764e+08	2.11645e+09	2.20232e+08	2.66227e+09	2.15204e+08	1.58275e+09
131	M85T86	84.9113	85.6976	1.43	7.80522e+06	3.04511e+07	8.06261e+06	2.83237e+07	2.98817e+07	6.6733e+06	2.94147e+07	2.37892e+07	7.10258e+06	6.39898e+06	5.98574e+06	2.7615e+07	4.52355e+07	1.16539e+07	3.92445e+07	4.44683e+07	4.55181e+07	4.70408e+07	5.20084e+07	5.2992e+07	5.16062e+07	5.48494e+07	1.22035e+07	5.47476e+07	3.59933e+07	3.57729e+07	3.51042e+07	4.17695e+07	3.66853e+07
132	M85T78	84.96	78.4997	1.31	1.06723e+08	1.40024e+08	1.15161e+08	1.14447e+08	1.18615e+08	1.29567e+08	2.11745e+08	2.14995e+08	2.21514e+08	2.17491e+08	2.61032e+08	2.716e+08	2.449e+08	2.17174e+08	2.86134e+08	2.50731e+08	2.95742e+08	2.31866e+08	2.89435e+08	3.4007e+08	3.39781e+08	3.23284e+08	2.64895e+08	4.18215e+08	2.22327e+08	2.3712e+08	2.41976e+08	2.09407e+08	2.36251e+08
133	M85T143	84.96	142.572	2.38	7.54088e+07	1.1622e+08	5.55227e+07	7.32525e+07	1.48649e+08	5.94636e+07	6.18321e+07	1.49124e+08	5.9948e+07	8.04224e+07	6.89205e+07	4.16395e+07	4.82879e+07	3.86597e+07	3.96892e+07	3.51842e+08	3.21978e+07	5.07089e+07	5.69532e+07	4.90973e+08	4.95674e+07	3.49774e+07	5.29255e+07	4.74499e+07	4.3576e+07	1.1942e+08	4.21341e+07	3.05011e+08	3.27798e+08
134	M85T50	84.9601	50.3537	0.84	5.26639e+07	4.72338e+07	7.6878e+07	7.45192e+07	1.09164e+08	3.09674e+08	6.90258e+07	9.07296e+07	7.7019e+07	9.81341e+07	1.15671e+08	9.93682e+07	1.16453e+08	5.79744e+07	6.58945e+07	2.85859e+08	6.6127e+07	2.46104e+08	7.08438e+07	5.83775e+07	2.26943e+08	6.61792e+07	7.68265e+07	2.38098e+08	1.84984e+08	2.50628e+08	9.10407e+07	2.30857e+08	8.37479e+07
135	M85T280	84.9601	280.389	4.67	1.63504e+08	1.04502e+08	9.65615e+07	1.71732e+08	9.61719e+07	3.3562e+08	1.70423e+08	1.62825e+08	3.10258e+08	3.07928e+08	1.08592e+08	3.22395e+08	7.9825e+07	6.25816e+07	8.43273e+07	1.28214e+08	1.01187e+08	2.65133e+08	1.4961e+08	9.09265e+07	6.80482e+07	1.41711e+08	2.83704e+08	1.03231e+08	9.58921e+07	1.07277e+08	2.62697e+08	1.09472e+08	1.45253e+08
136	M85T155	84.96	154.514	2.58	5.18324e+07	5.27716e+07	5.77186e+07	1.00104e+08	9.53678e+07	9.69902e+07	1.48041e+08	1.59096e+08	6.25173e+07	5.42882e+07	6.51123e+07	6.46466e+07	3.63257e+07	5.61065e+07	2.92748e+08	3.70472e+07	6.20139e+07	6.47426e+07	6.19254e+07	3.76816e+08	6.41001e+07	6.28891e+07	3.45468e+08	3.74001e+08	5.58047e+07	1.82472e+08	5.73217e+07	6.07019e+07	5.26429e+07
137	M85T254	84.9601	254.37	4.24	1.94927e+08	8.93812e+07	6.08764e+07	1.25535e+08	1.04565e+08	9.84452e+07	1.81907e+08	1.8683e+08	6.86486e+07	8.89226e+07	1.11563e+08	7.96821e+07	1.63264e+08	9.84227e+07	1.06708e+08	1.72284e+08	6.47128e+07	1.04373e+08	1.12638e+08	8.36353e+07	6.52477e+07	8.22362e+07	5.78151e+07	6.59414e+07	9.78105e+07	1.12656e+08	8.50409e+07	8.34077e+07	9.82564e+07
138	M85T59	84.9601	59.3128	0.99	1.26613e+08	1.54168e+08	1.18591e+08	7.31922e+07	1.22589e+08	4.14804e+07	1.29319e+08	1.30588e+08	8.919e+07	7.71611e+07	9.86756e+07	1.44315e+08	1.0886e+08	2.05538e+08	1.12034e+08	4.93128e+07	4.88857e+07	4.84723e+07	1.1648e+08	1.50808e+08	5.48829e+07	9.82232e+07	1.83203e+08	6.38045e+07	2.73969e+07	3.44863e+07	1.23201e+08	3.83043e+07	8.22384e+07
139	M85T233	84.96	232.708	3.88	4.41198e+07	7.55246e+07	7.1716e+07	1.67522e+08	1.47679e+08	1.34348e+08	8.91974e+07	9.07259e+07	8.92364e+07	8.67099e+07	1.34386e+08	9.75276e+07	1.51621e+08	1.35476e+08	1.28922e+08	1.33296e+08	6.17721e+07	2.98288e+08	1.54948e+08	1.57911e+08	8.93094e+07	5.76452e+07	1.06553e+08	7.52229e+07	1.02235e+08	7.2583e+07	1.08672e+08	1.04332e+08	1.24156e+08
140	M85T191	84.9601	191.136	3.19	7.83654e+07	7.18732e+07	7.07158e+07	3.18739e+08	6.96104e+07	1.22082e+08	9.62726e+07	1.15921e+08	3.04143e+08	3.18693e+08	1.07219e+08	1.09668e+08	7.08112e+07	2.5848e+08	2.7386e+08	6.32121e+07	1.52729e+08	5.92946e+07	1.67183e+08	1.91155e+08	7.74103e+07	4.70539e+07	2.65702e+08	6.43386e+07	1.04277e+08	6.7178e+07	1.26245e+08	1.24093e+08	9.06226e+07
141	M85T200	84.9601	200.47	3.34	1.03997e+08	2.09306e+08	6.74811e+07	7.29121e+07	1.54115e+08	5.94404e+07	9.3111e+07	6.8259e+07	9.72239e+07	9.91231e+07	6.6437e+07	2.90736e+08	7.80172e+07	1.62386e+08	1.35922e+08	1.5025e+08	1.43094e+08	5.0632e+07	1.41623e+08	1.85308e+08	1.67764e+08	6.69869e+07	1.70644e+08	2.03996e+08	7.27005e+07	7.58676e+07	1.49839e+08	1.19406e+08	7.80287e+07
142	M85T297	84.9601	297.269	4.95	7.51265e+07	5.74516e+07	3.61578e+07	3.80934e+07	6.01491e+07	3.828e+07	4.81152e+07	1.1956e+08	4.69726e+07	4.85691e+07	9.50543e+07	4.59807e+07	5.69217e+07	9.96815e+07	6.10839e+07	5.22038e+07	8.75505e+07	7.26066e+07	7.16182e+07	1.10612e+08	1.05825e+08	8.59898e+07	7.71588e+07	9.2889e+07	4.45815e+07	5.58206e+07	5.28382e+07	5.75521e+07	8.84447e+07
143	M85T146	85.0287	146.188	2.44	4.14765e+08	3.73754e+08	4.11827e+08	3.62881e+08	6.18886e+08	4.26935e+08	2.69683e+09	6.22833e+08	1.22087e+09	5.43238e+08	9.86211e+08	3.32819e+09	1.1359e+09	1.66704e+09	1.7893e+09	2.73105e+09	1.36233e+09	1.94329e+09	1.58642e+09	2.00683e+09	1.93576e+09	6.13605e+09	6.68991e+09	1.37606e+09	1.06873e+09	7.74227e+08	1.36229e+09	1.00387e+09	2.024e+09
144	M85T94	85.0287	94.2229	1.57	8.51518e+08	8.43302e+08	8.6674e+08	2.18433e+08	2.23392e+08	2.31139e+08	3.34999e+09	4.04649e+09	3.0675e+09	3.42298e+09	3.86606e+09	3.6692e+09	6.02034e+09	5.40647e+09	5.41208e+09	5.29019e+09	5.69146e+09	5.10726e+09	5.44922e+09	5.45528e+09	1.12432e+10	5.10794e+09	5.45372e+09	1.03137e+10	4.60894e+09	4.77692e+09	4.86889e+09	4.5174e+09	8.46828e+09
145	M85T102	85.0286	102.305	1.71	1.62044e+09	1.65983e+09	1.60116e+09	3.2243e+09	3.46383e+09	3.5056e+09	2.45635e+09	2.53113e+09	2.7173e+09	2.68359e+09	2.72308e+09	2.64901e+09	3.84637e+09	3.97549e+09	3.95977e+09	4.39195e+09	3.65192e+09	4.31394e+09	5.27217e+09	5.1175e+09	1.19313e+09	4.41598e+09	4.5631e+09	1.03916e+09	2.87625e+09	3.61587e+09	3.45855e+09	3.13829e+09	8.20792e+08
146	M85T124	85.0287	123.58	2.06	3.27732e+08	6.95461e+08	4.42747e+08	1.20798e+08	9.6629e+07	1.00614e+08	2.22497e+08	1.00519e+09	6.68231e+08	2.1605e+09	5.19304e+08	2.44973e+08	1.52566e+09	1.98727e+09	1.74623e+09	3.53804e+09	1.88544e+09	1.95359e+09	1.90583e+09	2.40725e+09	1.84716e+09	4.8929e+08	4.13105e+08	1.52288e+09	1.76842e+08	2.52733e+08	1.00873e+09	9.16795e+08	1.54218e+09
147	M85T92	85.048	92.2022	1.54	3.63828e+07	3.14501e+07	3.34112e+07	3.42662e+07	3.42022e+07	3.32646e+07	7.0006e+07	7.19802e+07	5.47747e+07	5.90222e+07	6.1682e+07	6.74922e+07	7.20436e+07	9.13781e+07	7.45378e+07	8.68037e+07	6.69848e+07	7.24855e+07	7.5107e+07	6.32269e+07	7.73391e+07	6.96033e+07	7.11408e+07	8.51683e+07	6.91508e+07	6.93908e+07	6.80414e+07	6.75609e+07	6.71069e+07
148	M85T599	85.0651	598.643	9.98	3.4185e+07	3.17883e+07	3.24039e+07	3.10738e+07	2.68266e+07	3.10496e+07	8.8169e+06	1.33043e+07	1.13612e+07	9.10738e+06	7.19996e+06	6.3431e+06	6.98997e+06	8.01125e+06	7.22904e+06	9.77336e+06	9.57509e+06	8.41766e+06	9.90619e+06	1.01782e+07	1.19529e+07	1.24762e+07	1.55412e+07	1.37692e+07	1.50117e+07	1.53113e+07	1.76728e+07	1.46474e+07	1.4666e+07
149	M85T557	85.0652	556.896	9.28	8.30843e+07	7.36058e+07	7.74869e+07	7.77484e+07	7.5164e+07	6.97525e+07	1.33973e+07	1.69902e+07	1.87155e+07	1.84291e+07	8.89273e+06	1.77068e+07	1.22435e+07	1.79415e+07	1.29651e+07	1.80473e+07	1.86952e+07	1.16857e+07	1.94476e+07	2.09834e+07	1.77731e+07	2.44111e+07	3.17858e+07	3.05061e+07	3.36219e+07	3.59763e+07	3.18848e+07	3.74988e+07	3.46185e+07
150	M85T104_1	85.0651	103.581	1.73	7.00432e+06	2.30284e+07	2.21775e+07	4.89666e+06	1.24946e+07	6.40721e+06	7.10073e+06	1.46356e+07	1.4789e+07	2.07064e+07	5.94215e+06	6.56912e+06	9.09066e+06	1.99752e+07	8.17061e+06	1.23702e+07	8.88115e+06	7.04203e+06	6.90416e+06	8.9011e+06	3.67062e+07	1.56194e+07	1.04859e+07	1.31731e+07	1.64689e+07	8.45837e+06	2.24199e+07	1.6072e+07	7.63908e+06
151	M85T32	85.0842	31.8834	0.53	4.40237e+07	3.05151e+07	3.30407e+07	3.15355e+07	3.40968e+07	4.13167e+07	3.75761e+07	3.62481e+07	4.03045e+07	4.07323e+07	3.21337e+07	3.82877e+07	3.29444e+07	3.57344e+07	2.1369e+07	3.65598e+07	4.1226e+07	3.72499e+07	3.23139e+07	3.37303e+07	3.38582e+07	3.59945e+07	2.98264e+07	3.80931e+07	3.0472e+07	3.53381e+07	4.01803e+07	3.56818e+07	3.82241e+07
152	M85T104_2	85.0844	103.76	1.73	7.6164e+06	6.78709e+06	6.95737e+06	5.41641e+06	6.78044e+06	7.28942e+06	7.81755e+06	4.10141e+07	6.80044e+06	8.14988e+06	6.35849e+06	3.94115e+07	3.28866e+07	4.21399e+07	8.66038e+06	3.69409e+07	4.36374e+07	3.0028e+07	3.31856e+07	3.32593e+07	3.96034e+07	5.43809e+07	3.96834e+07	5.38428e+07	4.25594e+07	2.99883e+07	3.11842e+07	4.24905e+07	4.27999e+07
153	M85T147	85.0844	147.112	2.45	1.42151e+07	1.51744e+07	1.15408e+07	1.58306e+07	1.59404e+07	6.11508e+07	1.64064e+07	1.49819e+07	1.41245e+07	1.55153e+07	1.48218e+07	4.61601e+07	8.1289e+07	7.20625e+07	7.80599e+07	6.3093e+07	7.60978e+07	7.12418e+07	1.86828e+07	1.64998e+07	1.82174e+07	8.26129e+07	7.77396e+07	7.75972e+07	7.76632e+07	1.0498e+08	1.51142e+07	1.77389e+08	7.56011e+07
154	M86T94	86.032	94.2604	1.57	7.72906e+06	3.54618e+07	3.15922e+07	2.55566e+07	7.98848e+06	3.00343e+07	1.47499e+08	1.813e+08	1.27488e+08	1.71586e+08	1.77691e+08	1.63616e+08	3.34829e+08	2.13502e+08	2.21687e+08	2.1057e+08	2.39135e+08	4.24863e+08	5.07871e+08	2.34601e+08	2.2971e+08	2.25303e+08	2.29106e+08	2.49903e+08	2.37626e+08	3.63234e+08	2.17508e+08	1.85857e+08	3.72184e+08
155	M86T102	86.0321	101.687	1.69	1.18963e+08	6.55048e+07	7.01986e+07	7.20941e+07	1.32529e+08	7.51088e+07	1.0926e+08	1.00402e+08	1.31509e+08	1.0483e+08	1.19019e+08	8.25597e+07	4.72805e+07	1.50222e+08	1.60165e+08	1.91556e+08	1.9458e+08	4.49786e+07	5.43728e+07	1.44134e+08	1.93753e+08	1.90508e+08	2.1442e+08	1.94329e+08	2.93526e+07	3.84554e+07	1.58352e+08	1.68936e+08	3.82697e+07
156	M86T92	86.0602	92.2022	1.54	1.96849e+08	2.07346e+08	2.28184e+08	2.05425e+08	2.24667e+08	1.97324e+08	3.57512e+08	2.83274e+08	2.14459e+08	2.51689e+08	2.81199e+08	4.60859e+08	5.65747e+08	6.43714e+08	6.02925e+08	5.46836e+08	5.87638e+08	5.00472e+08	3.97891e+08	4.5077e+08	4.80476e+08	4.76951e+08	4.31393e+08	4.58e+08	4.32403e+08	3.94046e+08	3.87137e+08	4.12554e+08	3.92997e+08
157	M86T233	86.0603	232.796	3.88	1.07522e+08	1.33068e+08	1.26017e+08	1.30858e+08	1.23734e+08	1.1917e+08	1.21594e+08	1.01118e+08	1.21957e+08	1.10638e+08	1.14952e+08	1.32595e+08	2.5494e+08	2.75013e+08	2.73852e+08	2.32673e+08	2.63275e+08	2.67471e+08	1.79188e+08	1.63342e+08	2.79334e+08	2.03664e+08	2.53057e+08	2.18258e+08	1.67434e+08	1.83533e+08	1.748e+08	1.73237e+08	2.03671e+08
158	M86T106	86.0604	105.663	1.76	1.03526e+08	5.02395e+07	1.00684e+08	1.10599e+08	2.75828e+07	1.32278e+08	2.83982e+07	5.54295e+07	5.96264e+07	9.38842e+07	7.2961e+07	1.5126e+08	1.31039e+08	1.09843e+08	1.298e+08	1.43114e+08	1.60945e+08	2.4889e+07	2.38744e+07	1.13152e+08	1.06076e+08	2.44258e+07	1.25732e+08	1.02201e+08	1.51379e+08	1.18636e+08	1.46322e+08	1.00155e+08	2.62579e+07
159	M86T148	86.0603	147.683	2.46	7.00418e+07	6.41954e+07	7.71023e+07	6.17197e+07	6.97166e+07	7.07497e+07	6.52327e+07	1.23722e+07	5.59622e+07	1.26396e+07	4.93889e+07	8.74113e+07	7.9597e+07	7.0497e+07	1.65883e+07	1.41401e+07	6.8674e+07	1.39324e+07	1.28622e+07	1.71187e+07	5.95322e+07	6.26825e+07	1.27499e+07	5.94429e+07	5.95222e+07	6.25388e+07	1.44667e+07	6.95446e+07	1.49453e+07
160	M86T221	86.0967	221.269	3.69	1.20201e+09	1.14752e+09	1.16634e+09	1.12111e+09	1.20223e+09	1.15766e+09	3.85217e+09	3.30086e+09	2.7678e+09	3.42059e+09	2.91584e+09	4.54044e+09	2.39764e+09	2.93336e+09	3.02432e+09	2.96868e+09	2.7718e+09	2.54453e+09	1.27407e+09	1.31596e+09	1.27684e+09	1.5712e+09	1.48713e+09	1.62e+09	2.15528e+09	2.15759e+09	2.26697e+09	2.24101e+09	2.31226e+09
161	M86T242	86.0966	242.112	4.04	2.27776e+09	2.19284e+09	2.13406e+09	2.01969e+09	2.13894e+09	1.94077e+09	2.17399e+09	4.08675e+08	2.00835e+09	1.89537e+09	1.64241e+09	2.2921e+09	1.39431e+09	1.57187e+09	1.48642e+09	1.70846e+09	1.58127e+09	1.51829e+09	1.09861e+09	1.11313e+09	1.15606e+09	1.27703e+09	1.46002e+09	1.44669e+09	1.80583e+09	1.74485e+09	1.6534e+09	1.76284e+09	1.8125e+09
162	M86T457	86.0964	457.418	7.62	3.54212e+07	3.08362e+07	2.64547e+07	3.37886e+07	1.81372e+07	3.29908e+07	2.00531e+07	2.31278e+07	2.07598e+07	2.38989e+07	2.12171e+07	2.63076e+07	2.0652e+07	6.70283e+06	6.14006e+06	2.00699e+07	1.70663e+07	2.11792e+07	1.61862e+07	1.71195e+07	1.96663e+07	2.23662e+07	5.66396e+06	2.02125e+07	5.83572e+06	5.74632e+06	4.9764e+06	2.01999e+07	5.43921e+06
163	M87T76	86.993	76.4315	1.27	1.51217e+09	1.75492e+09	1.71184e+09	1.6353e+09	1.84793e+09	1.71984e+09	1.92662e+09	2.00246e+09	1.90462e+09	1.87634e+09	1.83146e+09	1.92526e+09	1.64057e+09	1.61927e+09	1.74865e+09	1.68525e+09	1.65501e+09	1.77712e+09	2.00667e+09	2.00213e+09	2.04073e+09	1.96804e+09	1.97413e+09	2.24867e+09	1.8526e+09	1.86189e+09	1.89745e+09	1.83586e+09	1.8544e+09
164	M87T60	86.993	60.4066	1.01	1.03157e+07	7.99421e+06	9.65846e+06	1.18391e+07	1.49194e+07	8.85282e+06	1.19373e+07	7.63261e+06	1.18188e+07	1.06546e+08	9.32614e+06	8.23185e+06	1.04879e+08	9.8925e+06	8.69068e+06	9.70972e+07	1.37774e+07	9.84499e+07	9.91772e+07	1.0171e+08	8.56721e+06	9.84837e+06	9.83291e+07	9.73067e+07	1.09873e+07	1.47875e+07	9.95935e+06	1.60865e+07	2.11835e+07
165	M87T127	86.9916	126.945	2.12	1.00596e+08	1.0396e+08	1.47435e+07	1.08571e+08	1.12655e+08	2.06706e+07	1.12923e+08	1.18298e+08	6.1609e+06	1.09669e+08	1.24106e+07	1.20891e+07	9.6318e+06	1.37194e+07	1.70273e+07	1.41321e+07	1.24796e+07	1.18727e+07	1.21419e+07	1.24981e+07	1.01874e+07	1.14847e+07	1.27378e+07	1.26679e+07	1.04792e+08	1.97958e+07	1.19685e+08	1.11426e+08	7.83011e+06
166	M87T164	87.0079	164.051	2.73	3.10816e+07	3.41083e+07	2.91276e+07	2.54748e+07	3.11953e+07	2.89456e+07	2.52881e+07	2.13229e+07	2.90667e+07	2.44342e+07	2.4265e+07	2.13608e+07	1.1203e+08	1.81739e+07	1.7139e+07	2.26379e+07	2.13683e+07	2.16909e+07	2.38747e+07	1.09186e+08	1.67958e+07	2.06644e+07	2.38583e+07	1.82881e+07	3.18128e+07	2.10401e+07	2.55089e+07	2.24466e+07	2.24742e+07
167	M87T32	87.0442	31.883	0.53	1.00381e+08	8.59195e+07	8.83773e+07	8.37436e+07	9.56729e+07	8.79893e+07	1.10196e+08	7.53595e+07	7.35549e+07	1.0498e+08	7.60588e+07	8.61148e+07	7.74479e+07	7.61141e+07	5.63382e+07	8.03891e+07	7.66454e+07	8.31264e+07	8.51991e+07	9.85791e+07	8.19701e+07	7.48725e+07	7.01143e+07	7.05419e+07	1.02809e+08	8.81997e+07	9.05032e+07	7.33296e+07	4.76483e+07
168	M87T92	87.0443	92.3975	1.54	5.33092e+08	5.23303e+08	5.52732e+08	4.99501e+08	5.51598e+08	5.53842e+08	6.41023e+08	6.72199e+08	5.59082e+08	6.36154e+08	8.39038e+08	8.1765e+08	9.26052e+08	1.10445e+09	8.98887e+08	8.79677e+08	9.14146e+08	8.14722e+08	7.38626e+08	7.83906e+08	7.522e+08	8.03052e+08	7.73895e+08	7.45889e+08	7.59928e+08	7.5774e+08	7.33403e+08	7.19905e+08	7.39156e+08
169	M87T103	87.0442	102.848	1.71	3.24969e+08	2.67235e+07	3.39953e+08	3.0084e+07	1.7119e+07	3.25983e+08	4.36859e+08	1.04266e+08	4.12349e+08	2.07679e+07	3.02834e+07	6.26361e+07	3.6916e+08	9.33649e+07	8.09074e+07	8.92573e+07	9.41285e+07	3.59958e+08	8.87938e+07	8.9504e+07	9.01087e+07	5.1307e+08	3.7744e+08	9.39767e+07	4.24818e+08	6.29821e+06	4.45875e+08	9.44913e+07	3.22694e+08
170	M87T90	87.0555	90.0931	1.5	3.69826e+08	3.79681e+08	3.72533e+08	3.61344e+08	3.83412e+08	3.85116e+08	5.72262e+08	5.93012e+08	5.19187e+08	5.18193e+08	4.67991e+08	7.77988e+08	5.22199e+08	5.58283e+08	5.50574e+08	5.34779e+08	5.38752e+08	5.25052e+08	6.23043e+08	6.08377e+08	6.44487e+08	5.54302e+08	5.58917e+08	5.87663e+08	5.55105e+08	5.26858e+08	5.57976e+08	5.16041e+08	5.08842e+08
171	M87T221	87.1	221.308	3.69	6.32797e+07	6.57077e+07	6.37465e+07	6.21151e+07	6.5712e+07	6.75082e+07	2.11903e+08	1.76269e+08	1.51784e+08	1.91716e+08	1.67982e+08	2.66051e+08	1.41642e+08	1.66183e+08	1.73411e+08	1.6838e+08	1.52658e+08	1.37748e+08	6.46579e+07	7.37168e+07	7.01044e+07	8.94018e+07	8.39019e+07	8.91249e+07	1.27563e+08	1.21336e+08	1.19159e+08	1.22456e+08	1.23606e+08
172	M87T242	87.1	242.101	4.04	1.25842e+08	1.23961e+08	1.16451e+08	1.13025e+08	1.23421e+08	1.14007e+08	1.19273e+08	8.53326e+07	1.08678e+08	1.05519e+08	8.94973e+07	1.16231e+08	7.86225e+07	7.93506e+07	7.99968e+07	9.74089e+07	9.43293e+07	8.40909e+07	6.04421e+07	6.3124e+07	6.19803e+07	7.56127e+07	7.90248e+07	7.6187e+07	1.11207e+08	1.02838e+08	9.06148e+07	9.46203e+07	9.91812e+07
173	M88T76	87.9937	76.4315	1.27	1.88217e+08	2.12054e+08	2.07373e+08	2.1579e+08	2.37785e+08	2.04366e+08	2.36984e+08	2.50806e+08	2.27955e+08	2.42119e+08	2.3868e+08	2.34545e+08	1.91538e+08	2.0091e+08	2.15545e+08	2.0645e+08	1.97786e+08	2.19492e+08	2.40772e+08	2.44987e+08	2.47786e+08	2.45964e+08	2.38982e+08	2.75543e+08	2.33364e+08	2.15523e+08	2.41008e+08	2.38524e+08	2.35895e+08
174	M88T90	88.0396	90.2117	1.5	8.11425e+07	3.51735e+08	3.48717e+08	3.19711e+08	8.12473e+07	3.38328e+08	3.75096e+08	3.83839e+08	3.32519e+08	3.53696e+08	3.3578e+08	3.97639e+08	4.15421e+08	4.05719e+08	4.12876e+08	3.90756e+08	9.61722e+07	4.07903e+08	4.18776e+08	9.17463e+07	1.00919e+08	3.84723e+08	4.15184e+08	3.94074e+08	3.76396e+08	3.80898e+08	3.87481e+08	3.54773e+08	3.73238e+08
175	M88T106	88.0397	105.876	1.76	1.99329e+09	9.16257e+08	1.11236e+09	1.12404e+09	2.02352e+09	1.24299e+09	1.15563e+09	4.36328e+08	9.38769e+08	1.41877e+09	7.04596e+08	9.17238e+08	8.56036e+08	1.16555e+09	5.979e+08	4.2159e+08	1.8889e+09	1.03564e+09	6.07314e+08	1.98786e+09	6.03607e+08	1.12035e+09	1.18984e+09	1.13751e+09	8.84474e+08	1.18663e+09	1.06824e+09	7.50194e+08	1.35481e+09
176	M88T818	88.0759	817.9	13.63	9.51905e+07	6.99546e+07	8.20115e+07	2.43049e+08	3.0662e+07	1.37354e+08	1.0551e+08	2.80136e+08	8.99768e+07	8.14714e+07	2.70918e+07	2.09826e+08	9.31133e+07	2.0452e+08	2.80768e+08	2.5216e+08	2.87251e+07	1.14786e+08	6.39887e+07	1.02792e+08	2.80972e+07	1.97697e+08	1.34073e+08	8.76421e+07	3.1357e+08	6.2449e+08	8.32192e+07	1.07684e+08	7.8819e+07
177	M88T762	88.0758	761.961	12.7	5.31526e+07	1.16358e+08	5.91305e+07	1.92396e+07	4.64118e+07	2.21348e+08	6.51232e+07	8.42658e+07	6.30982e+07	1.12341e+08	5.52243e+07	1.56317e+07	6.37808e+07	1.72149e+07	5.92867e+07	1.56272e+07	8.76861e+07	6.25e+07	1.75325e+07	4.29639e+07	7.1104e+07	6.8832e+07	7.23647e+07	1.33186e+08	7.87774e+07	2.06001e+07	7.0557e+07	9.34201e+07	6.78576e+07
178	M88T699	88.0762	699.308	11.66	8.73094e+07	3.37913e+07	6.01842e+08	3.29831e+08	3.12152e+07	1.32094e+08	9.09118e+08	9.69266e+07	8.01948e+07	3.33683e+07	1.38976e+08	1.13153e+08	4.93814e+08	1.7771e+08	2.76283e+07	7.0523e+08	1.18437e+08	7.81256e+08	9.71041e+07	1.03559e+08	9.88794e+07	9.40448e+07	2.28433e+08	1.21681e+08	3.62761e+07	1.34755e+08	1.49254e+08	3.28666e+07	2.93074e+07
179	M88T549	88.0761	548.841	9.15	1.7029e+08	9.27979e+07	1.01761e+08	1.21724e+08	1.34461e+08	4.57855e+08	7.80075e+08	1.10795e+08	1.18063e+08	3.78631e+08	2.15453e+08	1.21221e+08	1.57071e+08	6.65349e+07	1.43896e+08	3.93559e+07	3.99397e+08	9.70457e+07	1.70106e+08	1.65254e+08	2.54498e+08	3.83798e+07	1.21007e+08	1.07512e+08	4.06888e+07	7.74622e+07	3.76268e+07	1.3352e+08	4.62913e+08
180	M88T485	88.0758	485.027	8.08	2.07959e+08	2.83865e+07	2.64899e+07	2.81694e+07	2.49297e+07	1.20048e+08	2.35562e+07	1.01559e+08	2.27661e+07	7.56526e+07	8.86924e+07	2.38752e+07	8.99102e+07	1.26474e+08	1.33468e+08	1.06609e+08	9.31535e+07	2.56795e+07	1.90427e+08	2.61509e+07	1.09121e+08	1.86923e+08	1.40531e+08	1.1525e+08	1.08257e+08	3.11984e+07	1.06236e+08	9.55657e+07	1.24008e+08
181	M88T656	88.0761	656.249	10.94	7.59984e+07	3.43508e+07	1.2616e+08	1.31451e+08	1.79153e+08	2.01401e+08	3.2292e+07	2.65813e+08	2.11737e+08	1.42152e+08	1.19917e+08	8.76786e+07	2.20717e+08	3.45904e+07	3.22197e+07	2.24111e+08	8.5535e+07	1.14223e+08	1.07816e+08	3.34404e+07	1.20013e+08	1.15047e+08	2.95301e+07	1.98903e+08	3.37355e+07	1.62265e+08	2.43703e+08	1.13904e+08	4.28826e+08
182	M88T777	88.0758	776.915	12.95	6.27146e+07	1.2353e+08	5.79576e+07	1.52926e+08	1.927e+07	2.19109e+07	1.05556e+08	6.43702e+07	9.27689e+07	1.91462e+07	5.28304e+07	1.74238e+08	6.93064e+07	5.35797e+07	1.84568e+07	1.21774e+08	1.84397e+07	8.23451e+07	7.93279e+07	1.96112e+07	1.79025e+07	7.86269e+07	1.90493e+07	1.97295e+07	2.43039e+07	2.22937e+07	1.15055e+08	1.65115e+07	6.91643e+07
183	M88T604	88.0761	603.946	10.07	1.15321e+08	1.27593e+08	2.64291e+07	2.68227e+07	1.26584e+08	1.13378e+08	2.62001e+07	9.51154e+07	2.64487e+07	9.37266e+07	1.58024e+08	1.23788e+08	1.04921e+08	1.19686e+08	1.3232e+08	1.18958e+08	2.73744e+07	2.76859e+07	2.63509e+07	1.32078e+08	1.40532e+08	2.49035e+08	1.45704e+08	2.76903e+07	1.54571e+08	1.37166e+08	1.19284e+08	1.76862e+08	1.55602e+08
184	M88T835	88.0758	834.91	13.92	6.19547e+07	8.11127e+07	6.97374e+07	1.62564e+07	2.65125e+08	5.45319e+07	5.8491e+07	1.53067e+07	7.85651e+07	3.25878e+07	9.01777e+07	1.34573e+07	3.51588e+07	1.44063e+07	1.38157e+07	1.52149e+07	3.7427e+08	6.22304e+07	5.85815e+07	5.27303e+07	1.21084e+07	3.48356e+07	8.31035e+07	1.10962e+08	1.564e+07	1.79605e+07	9.01783e+07	7.30988e+07	3.32142e+07
185	M88T642	88.0761	641.837	10.7	1.30211e+08	1.10245e+08	3.99134e+07	1.37566e+08	1.01894e+08	3.40932e+07	1.27497e+08	3.50837e+07	1.19967e+08	1.41048e+08	1.07578e+08	1.46223e+08	2.57157e+08	1.93633e+08	2.60313e+08	1.56444e+08	3.43948e+07	1.20805e+08	3.48597e+07	3.76871e+07	4.18882e+08	2.22126e+08	3.51232e+08	1.15624e+08	2.11213e+08	1.31144e+08	3.87176e+07	1.49076e+08	4.01107e+07
186	M88T708	88.0761	707.643	11.79	9.30325e+07	3.34856e+07	2.71019e+07	3.23422e+07	1.63765e+08	2.5563e+07	2.68214e+07	8.04099e+07	1.56349e+08	5.35768e+08	2.28455e+07	9.61508e+07	2.59254e+07	1.14326e+08	1.08085e+08	2.50832e+07	8.78868e+07	2.66628e+07	6.97532e+07	2.6904e+07	8.55711e+07	1.01842e+08	3.02e+07	2.82747e+07	1.92285e+08	2.78404e+07	1.1399e+08	6.33587e+08	2.97833e+07
187	M88T526	88.0761	525.837	8.76	1.31885e+08	3.84339e+07	3.42463e+07	1.73352e+08	3.85405e+07	3.5075e+07	3.66856e+07	9.90762e+07	1.45608e+08	3.86157e+07	1.01733e+08	2.33047e+08	1.96499e+08	2.74373e+08	1.18637e+08	1.33492e+08	3.62303e+07	1.05273e+08	1.02432e+08	9.49121e+07	2.92508e+08	9.64098e+08	1.48362e+08	2.39899e+08	7.43295e+08	2.69583e+08	6.64471e+08	1.12697e+08	4.0333e+07
188	M88T627	88.0761	627.387	10.46	1.33613e+08	1.2008e+08	3.07602e+08	1.80639e+08	1.66514e+08	2.18172e+08	3.50829e+07	1.75037e+08	3.5333e+07	1.50215e+08	1.52291e+08	1.52342e+08	1.16946e+08	1.15134e+08	1.37944e+08	1.31035e+08	5.97573e+08	1.40492e+08	6.20741e+08	1.04218e+08	3.22819e+07	2.69069e+08	1.40962e+08	1.08678e+08	1.35678e+08	9.65121e+07	3.62344e+08	8.49218e+07	3.43826e+07
189	M88T666	88.0761	666.121	11.1	3.08087e+07	3.11155e+08	1.64373e+08	1.21587e+08	3.12999e+07	2.44525e+08	2.92852e+07	1.90161e+08	3.16166e+07	1.01109e+08	6.83669e+07	8.0416e+07	3.10081e+07	2.0344e+08	3.17779e+07	2.95146e+07	1.02166e+08	3.17072e+07	1.20833e+08	3.0288e+07	1.04494e+08	2.63376e+07	1.47467e+08	1.62954e+08	2.30824e+08	1.59501e+08	1.70928e+08	1.60125e+08	9.03263e+07
190	M88T788	88.0758	788.318	13.14	1.75919e+08	1.84847e+07	6.50321e+07	2.21149e+07	7.61134e+07	7.8134e+07	7.8278e+07	7.28532e+07	1.7066e+07	9.21655e+07	8.14686e+07	1.69004e+07	8.27122e+07	6.35318e+07	1.73351e+07	7.25619e+07	1.73909e+07	6.37163e+07	1.78049e+07	9.75759e+07	1.65484e+07	6.34319e+07	1.14679e+08	2.25159e+08	2.15642e+07	1.97588e+07	6.51924e+07	7.60193e+07	5.03082e+07
191	M88T688	88.0761	688.145	11.47	1.21253e+08	9.40395e+07	2.9992e+07	3.22859e+07	1.96568e+08	2.47774e+07	2.89254e+07	2.68935e+07	2.67284e+07	2.91777e+07	1.0362e+08	8.57918e+07	2.73528e+07	2.33785e+07	2.84129e+08	2.96776e+07	9.88392e+07	2.60131e+07	7.50147e+07	2.56832e+07	2.58756e+07	8.32081e+07	9.18219e+07	1.19164e+08	1.74275e+08	2.94138e+07	1.0816e+08	2.86301e+07	1.45652e+08
192	M88T612	88.0761	612.361	10.21	3.35037e+07	2.51441e+08	3.19667e+07	1.2757e+08	1.5568e+08	3.13954e+07	4.86206e+08	3.0481e+07	6.44012e+08	7.76527e+07	2.97142e+07	1.61297e+08	1.34567e+08	1.16629e+08	1.50207e+08	1.20598e+08	2.88917e+07	2.16036e+08	2.99255e+07	1.18831e+08	2.53542e+07	2.52476e+07	1.26622e+08	3.06479e+07	1.31507e+08	9.83326e+07	2.95477e+07	2.95481e+07	3.14878e+07
193	M88T754	88.0758	753.611	12.56	5.7993e+07	1.81963e+07	7.72219e+07	7.28175e+07	8.15278e+07	1.49116e+07	6.99532e+07	1.51952e+07	1.59718e+07	1.41799e+07	8.65281e+07	1.42879e+07	1.457e+07	1.69765e+07	1.51294e+07	1.18089e+08	1.0523e+08	8.0803e+07	1.42813e+08	6.69087e+07	1.55564e+07	6.41474e+07	5.98946e+07	1.62542e+07	1.09014e+08	2.13753e+07	7.62259e+07	1.43175e+07	6.92687e+07
194	M88T575	88.0761	574.703	9.58	1.76904e+08	2.25047e+08	3.6339e+07	3.63445e+07	3.7879e+07	1.20978e+08	3.76731e+07	1.59434e+08	2.43721e+08	1.78483e+08	1.74927e+08	3.48203e+08	1.05884e+08	3.01484e+08	2.34868e+08	3.68379e+07	2.01232e+08	1.12144e+08	1.05196e+08	1.09187e+08	1.09614e+08	3.24416e+07	4.36517e+08	3.85973e+07	1.16894e+08	2.443e+08	3.85366e+07	1.20558e+08	3.56653e+07
195	M88T592	88.0761	592.26	9.87	2.05751e+08	1.29868e+08	6.24392e+08	3.16077e+08	2.56385e+07	1.18224e+08	2.80268e+07	2.98728e+07	2.90707e+07	1.06589e+08	1.33962e+08	2.85446e+07	1.2924e+08	2.82309e+07	2.70312e+07	7.31346e+07	2.66775e+07	1.16382e+08	1.5218e+08	1.21865e+08	1.38921e+08	2.85099e+07	2.53324e+07	2.60866e+07	9.48275e+07	1.27884e+08	1.29227e+08	8.65492e+07	1.32019e+08
196	M88T736	88.0758	735.66	12.26	2.42759e+07	2.51812e+07	2.43065e+07	2.5604e+07	1.39593e+08	9.24191e+07	2.16112e+07	1.28922e+08	5.9984e+07	2.26681e+07	2.11327e+07	7.10364e+07	4.18526e+07	5.92175e+07	7.35369e+07	2.18378e+07	7.86335e+07	2.10927e+07	2.31621e+07	1.36075e+08	2.26648e+07	7.53381e+07	2.20988e+07	1.10085e+08	1.17206e+08	9.96103e+07	8.35918e+07	2.16074e+07	1.35015e+08
197	M88T717	88.0762	717.267	11.95	1.16319e+08	2.17408e+08	2.57978e+07	2.66945e+07	1.2421e+08	1.48662e+08	2.44236e+07	9.8984e+07	2.46759e+07	2.24504e+07	2.60793e+08	2.35011e+07	2.16074e+07	5.28495e+07	2.01996e+07	2.48036e+07	1.16179e+08	2.4609e+07	9.74699e+07	1.05327e+08	2.12963e+08	2.33644e+07	1.36877e+08	1.64455e+08	2.82306e+07	1.01132e+08	8.14111e+07	2.30908e+07	3.11209e+08
198	M88T332	88.1123	331.596	5.53	2.42962e+07	2.51447e+07	4.27184e+06	2.75533e+07	2.34322e+07	3.06231e+06	9.15342e+06	3.04094e+07	7.27938e+06	1.09384e+07	7.46399e+06	7.91413e+06	3.83188e+06	2.75408e+06	2.66022e+07	2.75681e+07	2.53204e+07	3.25542e+06	3.46784e+06	2.8697e+07	4.22352e+06	3.3896e+06	2.55534e+07	3.4265e+06	8.59962e+06	5.69538e+06	5.63435e+06	5.09056e+06	7.34515e+06
199	M89T34	88.5093	33.9623	0.57	3.62284e+07	3.8528e+07	4.04715e+07	2.93166e+07	3.34623e+07	3.93429e+07	3.93932e+07	3.8849e+07	3.92647e+07	4.28518e+07	3.76825e+07	3.52652e+07	3.74172e+07	3.36583e+07	3.52263e+07	4.36928e+07	4.08692e+07	4.42593e+07	4.25701e+07	3.50073e+07	3.99645e+07	4.10853e+07	4.48447e+07	4.12546e+07	4.47038e+07	4.04324e+07	3.64917e+07	4.23322e+07	3.72738e+07
200	M89T68	88.5092	67.6527	1.13	6.18596e+06	1.20811e+06	3.91034e+06	7.82023e+06	4.55242e+06	1.25894e+06	986646	4.4586e+06	1.12833e+06	4.60703e+06	3.45118e+06	740829	3.45459e+06	1.28227e+06	6.69303e+06	1.85531e+07	3.70329e+06	4.16176e+06	1.37346e+06	2.86165e+06	1.91679e+07	1.13217e+06	9.17141e+06	1.83503e+06	4.83927e+06	3.62768e+06	812132	2.73435e+06	6.71472e+06
201	M89T55	88.5092	55.3142	0.92	7.51754e+06	1.80466e+06	1.24607e+06	1.40041e+06	7.34711e+06	1.6031e+06	1.76172e+06	1.00333e+07	1.0299e+06	1.5388e+07	5.08198e+06	1.49965e+06	1.34591e+06	8.55175e+06	7.749e+06	1.98441e+06	5.27119e+06	5.0876e+06	1.65174e+06	5.79867e+06	2.10708e+06	1.10268e+06	6.37069e+06	1.74846e+06	1.54496e+06	1.70989e+07	1.36876e+06	1.59959e+06	7.94615e+06
202	M89T76	88.9905	76.4401	1.27	2.23391e+08	2.37819e+08	2.24235e+08	2.39806e+08	2.57003e+08	2.46719e+08	2.66776e+08	2.80512e+08	2.67571e+08	2.62792e+08	2.49445e+08	2.75139e+08	2.26557e+08	2.22925e+08	2.43953e+08	2.34193e+08	2.32774e+08	2.54223e+08	2.42057e+08	2.70541e+08	2.77178e+08	2.72982e+08	2.70806e+08	3.01971e+08	2.54329e+08	2.64875e+08	2.66068e+08	2.55777e+08	2.57424e+08
203	M89T77_1	89.0085	77.4107	1.29	5.35522e+07	4.75167e+07	3.13046e+07	4.76085e+07	7.29072e+07	6.36258e+07	7.95225e+07	8.98061e+07	7.4552e+07	7.17622e+07	1.03299e+08	9.78205e+07	6.55244e+07	1.29187e+08	9.78229e+07	1.02653e+08	9.94084e+07	1.04846e+08	7.33029e+07	8.59163e+07	9.3486e+07	9.52444e+07	6.6261e+07	5.21201e+07	7.75162e+07	6.94434e+07	6.79852e+07	4.34097e+07	8.16725e+07
204	M89T33	89.0085	32.9036	0.55	3.97012e+07	4.33694e+07	4.35759e+07	4.0133e+07	9.95504e+06	5.22971e+07	4.70696e+07	9.83983e+06	1.24719e+07	4.78804e+07	2.64218e+06	1.10521e+07	3.11754e+07	5.16023e+07	8.30903e+06	4.79701e+07	4.16561e+07	4.96851e+07	4.57017e+07	4.63631e+07	5.01796e+07	5.17635e+07	5.21953e+07	4.953e+07	6.84494e+07	4.29071e+07	1.22917e+07	3.85043e+07	3.9603e+07
205	M89T835	89.0082	835.242	13.92	1.41393e+07	1.1635e+07	1.77569e+07	1.27277e+07	2.82164e+06	2.35379e+06	1.15451e+07	2.15767e+06	8.34058e+06	1.71011e+07	1.05618e+07	2.98184e+06	3.61425e+06	1.61021e+07	3.16234e+06	1.24446e+07	1.10331e+07	1.1191e+07	7.95135e+06	3.2922e+06	2.87178e+06	2.89351e+06	2.74104e+06	3.38253e+06	2.25628e+07	2.19008e+07	2.40734e+06	1.10804e+07	1.3164e+07
206	M89T219	89.0236	219.024	3.65	6.52466e+08	4.13455e+08	5.00298e+08	6.38485e+08	7.16711e+08	3.51828e+08	2.48437e+08	5.28193e+08	4.98724e+08	3.47621e+08	3.75785e+08	2.50369e+08	2.55638e+08	3.31775e+08	2.6195e+08	5.17335e+08	2.87518e+08	5.37338e+08	3.08093e+08	3.74009e+08	6.27804e+08	6.35749e+08	5.80771e+08	6.17544e+08	6.15665e+08	6.05292e+08	3.40591e+08	2.9633e+08	6.08849e+08
207	M89T128	89.0236	127.542	2.13	4.73766e+07	4.18226e+07	4.35001e+07	5.63141e+07	3.74853e+07	4.88628e+07	6.67904e+07	9.07536e+07	4.43371e+07	5.17805e+07	6.98376e+07	6.63611e+07	2.09449e+07	2.09281e+07	7.61563e+07	9.21869e+07	1.86608e+07	7.47388e+07	9.90789e+07	1.03966e+08	9.07437e+07	9.59842e+07	2.05595e+07	1.50376e+08	6.62461e+07	9.56145e+07	7.10679e+07	7.35151e+07	9.94153e+07
208	M89T103	89.0236	103.412	1.72	2.47031e+07	6.68828e+06	1.70038e+07	2.45386e+07	1.77561e+07	2.57925e+07	3.262e+07	9.22222e+06	3.13772e+07	3.14137e+07	4.06343e+07	3.74816e+07	1.1981e+07	9.35893e+07	4.73507e+07	2.37442e+07	4.51381e+07	3.78227e+07	4.87399e+07	4.6668e+07	1.2569e+07	4.71891e+07	5.18415e+07	5.72875e+07	4.00474e+07	4.93692e+07	4.4896e+07	1.04184e+07	3.4023e+07
209	M89T435	89.0388	434.993	7.25	2.00288e+07	2.09303e+07	1.29178e+07	1.21912e+07	1.22517e+07	1.10508e+07	3.60187e+06	5.14106e+07	1.04949e+08	8.97084e+07	5.58886e+07	5.55142e+07	3.98885e+07	1.60969e+07	2.60526e+07	3.4511e+07	2.71322e+07	3.47196e+07	3.59424e+07	8.55681e+06	2.30034e+06	2.24391e+07	4.559e+06	4.95262e+07	1.981e+06	3.32596e+06	3.86862e+07	3.63534e+07	2.4499e+06
210	M89T490	89.0388	489.618	8.16	4.99118e+07	4.79861e+07	4.17239e+07	4.36446e+07	4.82766e+07	4.53913e+07	3.97418e+06	4.43771e+07	6.68707e+07	6.57646e+07	4.76907e+07	3.93665e+07	2.56797e+07	2.18526e+07	1.90021e+07	2.09425e+07	2.27637e+07	2.77438e+07	4.65975e+06	1.89214e+07	2.06996e+07	2.10549e+07	2.16729e+06	2.79948e+07	2.00887e+06	2.35156e+06	3.71498e+07	3.92305e+07	1.45463e+06
211	M89T105	89.0429	104.946	1.75	4.13994e+07	1.30728e+07	4.74622e+07	2.49395e+07	1.5424e+07	2.14064e+07	8.10456e+06	3.24106e+07	7.89904e+06	1.00949e+07	2.16996e+07	2.84447e+07	1.01709e+07	1.33627e+07	1.17079e+07	8.76874e+06	1.09984e+07	1.25405e+07	1.35905e+07	1.67612e+07	1.25087e+07	1.32518e+07	1.19625e+07	1.10825e+07	9.77235e+06	1.40442e+07	1.96417e+07	9.91744e+06	1.4875e+07
212	M89T150	89.0712	149.679	2.49	2.83089e+07	2.60109e+07	4.59201e+07	2.82127e+07	2.48893e+07	2.7095e+07	2.12284e+07	4.36712e+06	1.62769e+07	1.7367e+07	1.81055e+07	2.62781e+07	1.959e+07	1.55777e+07	1.33411e+07	9.59092e+06	1.10026e+07	1.43237e+07	1.71e+07	1.73531e+07	1.35828e+07	2.6421e+07	1.36469e+07	1.12357e+07	1.59156e+07	1.61912e+07	2.19022e+07	1.73217e+07	1.56036e+07
213	M89T104	89.06	104.309	1.74	5.59122e+06	8.08717e+06	4.41244e+06	3.09436e+07	4.6675e+06	3.68822e+07	2.63446e+07	7.16303e+06	9.84302e+06	3.27614e+06	3.18937e+06	7.60967e+07	9.37718e+06	2.07731e+06	2.8058e+06	1.39426e+07	2.57955e+06	1.10972e+07	2.60386e+06	2.45344e+07	1.71321e+07	1.28569e+07	2.74819e+06	1.61563e+07	1.22066e+07	1.00097e+07	1.53608e+07	9.32948e+06	9.02867e+06
214	M89T77_2	89.1076	77.3528	1.29	1.97182e+07	3.08859e+07	3.77141e+06	1.45105e+07	3.39304e+06	1.0578e+07	8.91644e+07	8.09423e+07	8.9674e+07	8.48571e+07	5.88852e+07	5.92275e+07	6.07193e+07	8.22587e+07	6.77293e+07	7.41747e+07	7.92045e+07	9.0778e+07	1.09526e+08	7.23032e+07	6.83108e+07	1.3912e+08	1.93712e+08	1.27423e+08	7.89063e+07	5.945e+07	7.80483e+07	8.67797e+07	6.47274e+07
215	M90T34_1	89.5069	33.9623	0.57	6.14542e+08	5.60182e+08	6.38707e+08	5.06926e+08	5.3471e+08	6.34977e+08	6.51742e+08	5.65085e+08	6.17466e+08	6.77902e+08	5.50423e+08	6.09954e+08	5.51744e+08	6.28867e+08	5.47416e+08	6.85223e+08	6.05482e+08	6.55169e+08	6.40983e+08	6.19525e+08	6.9881e+08	6.83132e+08	7.09395e+08	6.2889e+08	6.91167e+08	6.29186e+08	6.59643e+08	6.8646e+08	5.69296e+08
216	M90T68_1	89.5069	68.2448	1.14	4.21723e+08	4.01513e+08	9.8156e+07	2.38534e+08	9.45377e+07	8.36899e+07	1.07802e+08	8.71786e+07	8.03608e+07	4.07648e+08	3.86344e+08	4.03027e+08	7.49404e+07	3.07792e+08	3.72491e+08	4.18142e+08	1.56736e+08	9.23664e+07	4.30815e+08	3.39167e+08	1.19605e+08	4.34121e+08	2.57682e+08	4.27896e+08	1.00909e+08	3.0284e+08	9.24783e+07	9.57535e+07	3.83451e+08
217	M90T832	89.5068	831.632	13.86	1.86325e+08	1.93234e+08	1.09351e+08	4.64315e+08	1.57871e+08	1.90659e+08	2.29413e+08	2.7922e+08	1.23248e+08	1.18352e+08	9.33932e+07	4.23256e+08	1.76984e+08	1.02963e+08	1.41794e+08	4.36678e+08	3.71772e+08	1.34089e+08	7.93709e+07	1.15624e+08	1.41085e+08	1.27127e+08	1.05284e+08	1.83883e+08	2.15845e+08	1.32942e+08	4.90125e+07	2.50198e+08	4.65641e+08
218	M90T769	89.5072	769.373	12.82	2.94891e+08	1.44364e+09	1.24792e+09	5.09471e+08	3.12651e+08	3.174e+08	1.7352e+08	4.33151e+08	2.38503e+08	1.39119e+09	3.13254e+08	2.41803e+08	1.41795e+09	1.57949e+08	6.61991e+08	2.78075e+08	2.56579e+08	1.5369e+09	1.36949e+09	1.93774e+08	1.23531e+09	1.21502e+09	2.14033e+08	1.50989e+09	1.97874e+08	6.75939e+08	2.70672e+08	1.47167e+09	4.30457e+08
219	M90T819	89.5069	819.407	13.66	1.59614e+08	3.86724e+07	3.65213e+07	4.27916e+07	1.53289e+08	1.17831e+08	3.32577e+07	3.2193e+07	1.90998e+08	1.14779e+08	1.58191e+08	3.4895e+07	1.29272e+08	1.44323e+08	1.08958e+08	4.21203e+07	3.18656e+07	1.71041e+08	1.77628e+08	2.04689e+08	2.62938e+08	1.07672e+08	1.7268e+08	3.97349e+07	2.4898e+08	1.16683e+08	4.23792e+08	3.0465e+07	3.98465e+07
220	M90T794	89.5069	794.446	13.24	4.78623e+08	8.78926e+07	6.69329e+07	7.72055e+07	2.13994e+08	1.57671e+08	4.05658e+08	4.04174e+08	2.52018e+08	7.41154e+07	3.00235e+08	1.78451e+08	7.10814e+07	1.89579e+08	2.71184e+08	2.6913e+08	2.82838e+08	7.24008e+07	7.88015e+07	7.24489e+07	7.0667e+07	6.59726e+07	2.94192e+08	8.83234e+07	2.05896e+08	3.61258e+08	1.93034e+08	7.7964e+07	2.02931e+08
221	M90T76_1	89.5451	76.3716	1.27	3.56741e+07	6.77576e+07	5.72534e+07	8.02697e+07	5.90486e+07	8.554e+07	5.83703e+07	8.42733e+07	5.64369e+07	8.62816e+07	5.89217e+07	7.94765e+07	7.78042e+07	5.56783e+07	7.391e+07	5.32145e+07	7.49228e+07	5.94239e+07	8.30583e+07	6.24346e+07	1.02957e+08	6.24205e+07	8.69457e+07	6.88443e+07	8.99649e+07	5.53211e+07	8.94671e+07	7.10282e+07	6.82041e+07
222	M90T34_2	90.0083	33.9623	0.57	4.61132e+07	4.05976e+07	4.35663e+07	4.36585e+07	4.27084e+07	4.96325e+07	5.52162e+07	4.54519e+07	4.98272e+07	5.48211e+07	4.27601e+07	5.38696e+07	4.38057e+07	4.73126e+07	4.40602e+07	5.45465e+07	4.64968e+07	4.87823e+07	5.35956e+07	5.42158e+07	5.15691e+07	5.30692e+07	5.75191e+07	5.26842e+07	5.70202e+07	5.45428e+07	4.88578e+07	5.80455e+07	4.59423e+07
223	M90T68_2	90.0082	68.1162	1.14	1.26022e+06	1.76105e+06	7.41207e+06	9.38138e+06	1.66866e+07	6.35306e+06	6.8597e+06	9.88857e+06	3.19749e+07	3.77201e+06	5.33141e+06	1.41072e+06	1.55636e+06	9.81798e+06	5.63991e+06	8.85762e+06	4.69862e+06	9.45488e+06	2.92873e+07	6.66936e+06	2.79498e+07	4.11857e+06	2.08885e+06	1.7866e+06	6.8539e+06	4.76295e+06	2.2155e+07	3.36935e+06	2.42984e+07
224	M90T46	90.0082	46.487	0.77	3.25601e+06	4.37292e+06	2.03075e+07	4.16625e+06	2.23496e+07	1.00831e+07	3.80393e+06	1.01723e+07	4.25042e+06	1.36291e+07	1.90036e+07	3.46886e+06	9.45283e+06	2.12802e+07	1.90845e+07	2.11091e+07	1.5767e+07	3.32102e+06	3.54353e+06	4.08306e+06	4.09587e+06	3.72622e+06	1.93081e+07	9.81504e+06	1.88544e+07	8.78164e+06	3.27081e+06	1.71094e+07	3.6578e+06
225	M90T219	90.0269	218.637	3.64	1.88117e+07	1.26968e+07	4.38964e+06	1.79242e+07	2.33729e+07	2.68981e+07	3.18926e+06	1.54242e+07	1.10485e+07	3.49134e+06	9.59149e+06	2.40429e+06	7.209e+06	8.51443e+06	1.35768e+07	1.5543e+07	5.93533e+06	3.36595e+06	3.32942e+06	2.02207e+07	8.49939e+06	1.65439e+07	8.26216e+06	7.16377e+06	8.49858e+06	1.53228e+07	2.88462e+06	2.57294e+06	1.59037e+07
226	M90T76_2	90.0371	76.3427	1.27	2.50655e+07	5.25882e+06	1.75315e+07	2.17771e+06	3.39398e+06	4.2273e+06	4.79714e+06	5.57854e+06	1.31941e+07	1.71757e+07	6.94046e+06	1.75633e+07	2.90203e+07	6.91209e+06	3.86522e+07	3.37149e+07	2.96339e+07	7.99036e+06	4.54982e+07	4.38768e+07	6.20833e+07	4.52376e+07	2.90891e+07	5.35509e+07	3.32112e+06	1.94799e+07	3.16281e+07	2.89514e+07	1.05363e+07
227	M90T90	90.0551	90.1503	1.5	5.37447e+08	5.64867e+08	5.41096e+08	5.20717e+08	5.43509e+08	5.51693e+08	3.42991e+09	3.40706e+09	2.75495e+09	3.31632e+09	2.95752e+09	3.87634e+09	4.09526e+09	4.36583e+09	4.5965e+09	4.96358e+09	4.70293e+09	3.98967e+09	3.42587e+09	3.3634e+09	4.12291e+09	3.62963e+09	3.45517e+09	3.62469e+09	3.18446e+09	3.09768e+09	3.06974e+09	2.94139e+09	3.11428e+09
228	M90T105	90.0551	104.886	1.75	5.82745e+07	2.02997e+07	6.80981e+07	7.83492e+07	6.62211e+07	6.88062e+07	2.51526e+08	2.31547e+08	1.92387e+08	2.88345e+08	4.61292e+07	3.12259e+08	2.47358e+08	1.98092e+08	5.94793e+07	2.75983e+08	2.71131e+08	2.19303e+08	2.0024e+08	2.31257e+08	2.16587e+08	2.34414e+08	1.60152e+08	2.0354e+08	1.67709e+08	1.5515e+08	1.82581e+08	1.81596e+08	1.53942e+08
229	M90T364	90.0551	364.385	6.07	2.09978e+07	1.90525e+07	9.43375e+06	2.09587e+07	1.06131e+07	1.08527e+07	2.40201e+07	1.04111e+07	9.86732e+06	2.27757e+07	2.55753e+07	2.57129e+07	1.06629e+07	1.06553e+07	2.18182e+07	3.22477e+07	1.07125e+07	9.92885e+06	9.22325e+06	1.98184e+07	1.05705e+07	9.20968e+06	1.89921e+07	9.52598e+06	8.39964e+06	2.23314e+07	2.86491e+07	9.96155e+06	2.33815e+07
230	M90T36	90.0915	36.4766	0.61	1.64682e+08	2.02577e+08	1.65879e+08	1.49139e+08	1.28108e+08	1.65505e+08	2.69478e+08	2.36507e+08	2.39254e+08	1.92126e+08	1.74218e+08	2.26309e+08	1.29698e+08	1.99508e+08	2.21153e+08	1.40752e+08	2.34178e+08	1.44836e+08	2.50548e+08	2.41257e+08	1.35736e+08	1.38779e+08	1.30702e+08	2.45768e+08	1.57837e+08	2.50842e+07	1.4997e+08	1.57923e+08	2.48977e+08
231	M91T33	90.5071	32.9373	0.55	9.91507e+07	6.33378e+07	7.88714e+07	6.4857e+07	6.00392e+07	7.4169e+07	6.46528e+07	7.41688e+07	9.13818e+07	8.51672e+07	7.45987e+07	8.44197e+07	6.91153e+07	7.56489e+07	5.11508e+07	9.65224e+07	6.84563e+07	7.17774e+07	7.68231e+07	7.15052e+07	7.83818e+07	6.60089e+07	9.30815e+07	7.31594e+07	7.86203e+07	9.19032e+07	6.65014e+07	7.29866e+07	6.44707e+07
232	M91T69	90.5071	69.0731	1.15	1.03698e+07	3.1789e+06	3.4724e+06	4.09553e+06	1.16562e+08	1.37936e+08	4.7051e+06	1.2715e+08	1.21222e+08	3.58748e+06	1.23953e+08	6.22433e+06	1.37996e+08	3.83613e+06	2.05997e+07	4.66311e+06	5.38712e+06	4.92434e+06	6.95887e+06	5.7258e+06	9.76039e+06	4.12192e+06	1.19976e+07	5.61124e+06	1.16947e+08	2.25574e+07	3.49623e+06	1.31788e+08	2.42372e+07
233	M91T768	90.5072	768.365	12.81	1.83403e+08	5.87528e+07	5.56406e+07	1.76303e+08	5.45073e+07	3.03142e+08	6.5275e+07	1.81177e+08	6.81774e+07	4.63322e+08	2.7513e+08	1.62105e+08	3.19361e+08	5.80229e+07	6.03911e+07	2.79564e+08	3.04372e+08	5.70262e+07	2.68903e+08	4.97732e+08	4.11662e+08	3.34344e+08	2.4844e+08	1.73716e+08	1.87469e+08	1.99532e+08	2.95156e+08	5.62356e+07	1.82187e+08
234	M91T59	90.5071	58.6984	0.98	2.12329e+08	5.37298e+06	7.47383e+06	6.02181e+06	2.0766e+08	2.12998e+08	9.85849e+06	1.93331e+08	6.73229e+06	7.6516e+06	1.77153e+08	5.26069e+06	1.82784e+08	8.85882e+06	1.92283e+08	1.02363e+07	1.07144e+07	9.73414e+06	1.07581e+07	6.69723e+06	2.14782e+08	9.66946e+06	1.79721e+08	2.54024e+07	2.16957e+08	2.23639e+08	9.14297e+06	1.95464e+08	2.03067e+08
235	M91T757	90.5073	757.241	12.62	1.54203e+08	3.43794e+07	3.67917e+07	1.31165e+08	3.85822e+07	2.07854e+08	4.24126e+07	1.48492e+08	4.70725e+07	2.85956e+07	1.67204e+08	1.33974e+08	2.13185e+08	3.93882e+07	5.99739e+08	2.06686e+08	1.47731e+08	1.47032e+08	3.53632e+07	4.68662e+07	3.0703e+07	2.94447e+07	1.83852e+08	1.80047e+08	1.90003e+08	1.71327e+08	4.37959e+07	3.21394e+07	1.63718e+08
236	M91T829	90.507	828.819	13.81	5.74176e+08	1.81563e+08	1.27533e+08	6.75619e+08	1.23152e+08	4.61988e+08	1.24172e+08	5.16695e+08	1.60726e+08	5.06207e+08	5.49854e+08	5.26394e+08	4.31983e+08	2.86661e+08	5.78727e+08	2.06826e+08	7.13751e+08	1.41726e+08	2.06189e+08	4.93826e+08	7.18044e+08	6.77485e+08	2.46202e+08	7.04908e+08	6.30464e+08	5.06547e+08	5.83478e+08	1.21205e+08	6.16314e+08
237	M91T798	90.5073	797.875	13.3	2.22136e+08	6.9329e+07	7.17862e+07	7.81587e+07	7.59969e+07	2.12364e+08	6.52073e+07	7.78543e+07	7.43527e+07	2.92554e+08	3.48842e+08	7.12258e+08	2.38789e+08	6.46079e+07	6.41803e+07	6.34754e+08	4.44111e+08	7.7189e+08	3.08448e+08	2.16127e+08	2.336e+08	2.58722e+08	2.73864e+08	2.60681e+08	2.92053e+08	4.23951e+08	7.22481e+07	7.00823e+07	5.518e+08
238	M91T782	90.5072	782.453	13.04	2.28339e+08	6.51698e+07	1.95269e+09	1.66013e+08	6.24317e+07	1.72915e+08	1.87288e+09	1.63572e+08	7.54159e+07	6.7199e+07	2.28671e+08	6.44265e+07	2.95136e+08	1.31937e+09	4.08718e+08	6.63634e+07	7.27941e+07	6.85831e+07	2.25041e+08	2.99105e+08	6.46525e+07	1.70334e+08	3.54287e+08	1.78833e+08	2.10289e+08	2.8314e+08	6.18911e+07	6.04944e+07	2.38106e+08
239	M91T717	90.5068	716.804	11.95	5.52372e+07	8.69225e+07	7.38824e+07	5.5006e+07	1.52557e+08	9.50837e+07	8.26772e+07	7.8307e+07	3.89818e+07	4.99591e+07	5.04347e+07	7.04467e+07	8.66152e+07	7.55332e+07	3.41799e+07	9.70652e+07	1.41338e+08	5.09004e+07	5.80256e+07	1.01525e+08	3.61506e+07	4.26707e+07	5.19453e+07	8.64018e+07	1.12098e+08	6.37832e+07	1.64986e+08	6.09859e+07	4.8425e+07
240	M91T730	90.5068	730.476	12.17	1.01372e+08	3.00867e+07	2.69104e+07	8.92823e+07	2.74816e+07	8.48649e+07	2.8146e+07	1.07974e+08	1.49375e+08	6.53592e+07	2.70272e+07	9.64436e+07	1.77862e+08	1.22644e+08	2.15787e+08	6.685e+07	2.77078e+07	2.9201e+07	2.8546e+07	1.73282e+08	1.37693e+08	6.40165e+07	6.81853e+07	8.26516e+07	1.13082e+08	7.56344e+07	2.57042e+07	3.24553e+07	7.38799e+07
241	M91T78_1	90.526	78.4997	1.31	8.72088e+07	8.68911e+07	3.61661e+08	4.02626e+08	8.04538e+07	1.01272e+08	7.34798e+08	7.92091e+08	7.17684e+08	7.66824e+08	7.88673e+08	8.2658e+08	7.69716e+08	7.60224e+08	8.88282e+08	8.22416e+08	7.30469e+08	7.24355e+08	9.00408e+08	1.10605e+09	1.16048e+09	9.5815e+08	8.07995e+08	1.2564e+09	7.86679e+08	7.78588e+08	7.68518e+08	7.42543e+08	7.46225e+08
242	M91T43	90.526	43.45	0.72	3.53762e+09	3.56409e+09	1.91667e+09	1.68255e+09	3.54528e+09	3.60078e+09	2.35057e+09	2.50335e+09	2.41005e+09	2.26894e+09	1.57384e+09	2.25694e+09	1.99808e+09	2.17947e+09	2.46837e+09	2.34608e+09	2.47937e+09	1.89489e+09	2.11021e+09	2.14099e+09	2.44716e+09	1.02448e+09	1.91785e+09	2.03947e+09	2.50389e+09	2.40047e+09	2.29831e+09	2.1076e+09	2.14936e+09
243	M91T689	90.5258	689.428	11.49	6.4388e+08	3.50733e+08	9.63835e+07	7.88402e+08	5.29214e+08	5.89155e+08	3.30641e+08	5.57319e+08	2.64787e+08	1.09913e+08	5.70962e+08	3.807e+08	9.97065e+07	7.50295e+07	9.13011e+07	3.20285e+08	2.17294e+08	3.05458e+08	4.43023e+08	9.30979e+07	4.76706e+07	1.44693e+08	3.97424e+08	1.03495e+08	8.80013e+08	1.35302e+09	5.78265e+08	5.13846e+08	8.64083e+08
244	M91T607	90.5259	607.272	10.12	5.97445e+08	4.19807e+08	7.00257e+08	7.24686e+08	1.49552e+08	8.31027e+08	6.62721e+08	5.06013e+08	1.81576e+09	6.75548e+08	3.72018e+08	5.69893e+08	8.91304e+08	8.67958e+08	1.44262e+08	6.9836e+08	1.72e+08	3.702e+08	5.05652e+08	1.67107e+08	1.50737e+08	6.78749e+08	1.57322e+08	7.23468e+08	1.6144e+08	5.39408e+08	1.52929e+08	6.92812e+08	6.24457e+08
245	M91T68_1	90.526	68.1139	1.14	1.71563e+08	1.83173e+08	9.10475e+08	6.35036e+08	1.73006e+08	1.65635e+08	8.53556e+08	8.94236e+08	1.77854e+08	7.02097e+08	1.50024e+09	8.21181e+08	1.97974e+08	1.93536e+08	2.08821e+08	8.56298e+08	1.96376e+08	7.58962e+08	6.65915e+08	9.11139e+08	2.02863e+08	1.34304e+09	1.96863e+08	1.85668e+08	8.47616e+08	9.60579e+08	9.88343e+08	7.35656e+08	7.35734e+08
246	M91T662	90.5258	661.833	11.03	6.58526e+08	9.98598e+07	2.8172e+09	1.06708e+08	4.62143e+08	4.67514e+08	3.96683e+08	4.69112e+08	4.03697e+08	9.36111e+07	2.42672e+09	9.59377e+07	4.11714e+08	1.03932e+08	4.55932e+08	3.39515e+08	9.90605e+07	1.12431e+08	1.10745e+08	2.41017e+09	3.22722e+09	7.80492e+07	1.08081e+08	9.98385e+07	1.00116e+09	6.50001e+07	7.8976e+08	4.47769e+08	2.90055e+08
247	M91T550	90.5258	549.51	9.16	1.22291e+08	1.20366e+08	5.25276e+08	1.17711e+08	1.04353e+08	5.37784e+08	1.25445e+08	1.28184e+08	5.88095e+08	1.06668e+08	5.65701e+08	5.477e+08	1.1885e+08	1.21702e+08	5.48744e+08	1.36946e+08	1.02964e+09	9.43335e+08	9.57019e+08	8.37723e+08	4.29627e+08	8.81725e+08	4.07607e+08	1.06964e+08	4.02518e+08	6.43381e+08	4.82269e+08	4.60005e+08	3.98467e+08
248	M91T577	90.5258	576.879	9.61	1.78681e+09	1.7381e+08	1.4544e+09	7.31189e+08	1.72638e+08	4.68059e+08	4.74815e+08	5.19716e+08	5.48357e+08	5.68229e+08	6.85643e+08	4.71624e+08	4.80431e+08	1.12219e+09	2.58287e+09	4.7775e+08	1.63163e+09	1.35336e+09	2.21436e+09	1.27492e+09	1.93249e+09	4.99537e+08	1.97318e+09	5.98873e+08	1.95118e+09	4.67144e+08	1.65857e+08	7.0834e+08	1.83416e+09
249	M91T652	90.5258	652.426	10.87	6.22422e+08	1.04861e+09	1.58219e+08	1.20058e+09	7.14271e+08	3.90662e+08	4.67666e+08	5.28856e+08	5.32619e+08	1.24903e+08	1.61605e+08	3.49857e+08	4.44104e+08	2.03867e+09	4.3794e+08	1.60867e+08	3.6801e+09	4.67963e+08	1.11194e+09	1.5261e+08	1.40108e+08	1.99098e+09	5.20042e+08	4.76022e+08	1.50865e+08	3.11223e+08	6.48772e+08	5.33713e+08	4.86969e+08
250	M91T624	90.5258	624.345	10.41	5.16655e+08	1.26872e+09	1.05068e+08	8.17994e+08	2.07144e+09	6.7908e+08	4.96012e+08	1.10301e+08	1.06237e+08	1.18965e+08	1.06344e+08	7.05143e+08	4.30475e+08	4.03967e+08	1.03288e+08	1.02268e+08	1.3085e+08	7.27667e+08	1.13615e+09	1.08933e+08	1.18494e+08	1.05139e+08	4.46799e+08	4.17165e+08	1.05067e+08	5.48982e+08	1.03613e+08	4.09962e+08	1.09642e+08
251	M91T591	90.5258	591.293	9.85	1.49131e+08	9.74734e+08	1.5621e+08	6.51381e+08	5.91581e+08	4.82193e+08	5.7749e+08	5.23504e+08	161951763	6.38408e+08	7.12366e+08	6.86022e+08	1.65316e+08	7.06905e+08	1.50105e+08	5.7776e+08	1.64507e+08	5.35044e+08	1.6273e+08	6.84964e+08	1.5484e+08	7.96071e+08	1.50979e+08	5.51799e+08	1.39502e+08	6.19735e+08	2.04985e+09	5.9059e+08	1.40299e+08
252	M91T531	90.5258	531.131	8.85	1.7861e+08	1.8932e+08	1.83452e+08	3.10534e+09	1.84062e+08	1.84877e+08	2.05207e+09	1.93693e+08	1.95788e+08	1.84085e+08	7.71859e+08	8.07682e+08	1.32817e+09	2.16243e+09	7.96737e+08	2.03275e+08	4.37895e+08	6.7996e+08	7.48363e+08	7.37079e+08	1.10712e+09	7.65337e+08	5.2119e+08	2.9445e+09	7.1199e+08	5.04012e+08	1.86702e+08	1.84777e+08	1.75779e+08
253	M91T715	90.5259	715.256	11.92	2.39965e+08	5.84525e+07	5.73728e+07	6.19332e+07	5.16927e+07	5.39694e+07	2.93075e+08	5.87841e+07	1.24753e+08	5.32386e+07	6.10078e+07	5.77903e+07	4.01386e+08	1.40768e+08	1.55507e+08	2.49059e+08	3.54214e+08	1.90212e+08	1.94342e+08	4.58584e+07	4.17806e+08	4.79678e+07	4.02663e+08	3.19445e+08	5.92115e+07	4.86853e+07	1.89055e+08	2.87764e+08	1.6733e+08
254	M91T68_2	90.9479	68.3912	1.14	1.52327e+07	1.55291e+07	2.46267e+07	1.87828e+07	2.83445e+07	4.88029e+06	2.11326e+07	4.56437e+06	2.39325e+07	1.94921e+07	1.31886e+07	4.14539e+06	2.39799e+07	1.45565e+07	4.86201e+06	9.62143e+06	4.85025e+07	1.77446e+07	1.5824e+07	4.45143e+06	5.48254e+06	4.52622e+07	4.46827e+06	1.29659e+07	5.32966e+07	4.26755e+06	2.36431e+07	1.5553e+07	1.84361e+07
255	M91T76	91.0143	76.42	1.27	1.27272e+07	1.81804e+07	1.09279e+07	3.07803e+07	1.27434e+07	3.71647e+07	4.31769e+07	3.60827e+07	3.94141e+07	3.74089e+07	3.83152e+07	4.11826e+07	3.28512e+07	1.62906e+07	3.77737e+07	1.83335e+07	3.03737e+07	1.4208e+07	4.36575e+07	3.72362e+07	3.96302e+07	4.4479e+07	4.40336e+07	5.20683e+07	3.32479e+07	3.82074e+07	3.85953e+07	4.25672e+07	4.10304e+07
256	M91T78_2	91.0278	78.4951	1.31	9.08317e+06	7.56817e+06	8.14382e+06	8.46862e+06	8.88339e+06	9.07944e+06	4.6941e+07	4.2352e+07	1.09293e+07	4.16554e+07	4.4568e+07	4.43077e+07	5.29722e+07	5.06404e+07	5.93443e+07	5.69181e+07	4.78428e+07	1.14071e+07	4.76785e+07	7.65672e+07	5.47013e+07	4.09845e+07	4.86313e+07	6.58364e+07	5.32083e+07	4.8523e+07	4.91959e+07	3.00709e+07	5.43047e+07
257	M91T176	91.0181	176.252	2.94	8.76544e+06	1.15865e+07	8.89281e+06	8.53744e+06	7.15547e+06	4.76774e+07	1.17629e+07	1.69955e+07	9.75611e+06	1.14907e+07	9.20521e+06	1.83813e+07	1.25877e+07	1.31831e+07	1.13157e+07	1.17011e+07	1.1272e+07	1.32814e+07	9.60852e+06	1.12195e+07	9.08672e+06	1.11352e+07	7.18425e+06	8.57583e+06	1.09956e+07	1.00847e+07	1.1632e+07	1.11579e+07	1.24363e+07
258	M91T68_3	91.0281	68.2024	1.14	1.29447e+07	1.46886e+07	1.28589e+07	1.25645e+07	1.29105e+07	1.14753e+07	1.34048e+07	1.19036e+07	6.54225e+06	6.69947e+07	7.79334e+07	6.31937e+07	4.34677e+07	3.82583e+07	5.04921e+07	5.01936e+07	1.20257e+07	4.18021e+07	1.48699e+07	5.00191e+07	3.58169e+07	3.71761e+07	6.42262e+07	9.30565e+07	1.23851e+07	7.57346e+07	5.16481e+07	6.83161e+07	4.85901e+07
259	M91T41	91.0281	41.2631	0.69	2.31128e+07	8.31832e+06	2.43363e+07	2.32468e+08	2.38573e+07	2.25911e+07	1.80446e+08	3.41532e+07	7.21807e+06	5.12761e+07	1.32763e+08	1.55863e+08	4.36902e+07	8.97366e+07	7.16253e+07	1.18182e+08	3.86244e+07	1.37689e+08	4.6599e+07	4.68245e+07	5.60895e+07	1.41218e+08	1.1433e+08	7.26156e+07	1.90561e+08	1.45766e+08	7.51837e+07	1.20056e+08	9.9174e+07
260	M91T357	91.0281	356.502	5.94	5.57174e+07	6.65035e+07	3.43559e+07	1.86004e+07	4.1873e+07	3.91178e+07	5.66374e+07	1.86306e+07	1.88557e+07	5.581e+07	1.84929e+07	9.71201e+07	1.9038e+07	1.64964e+07	1.77219e+07	8.05734e+07	1.61479e+07	1.7636e+07	1.9755e+07	7.86501e+07	1.72136e+07	1.65481e+07	7.16265e+07	1.60011e+07	1.12193e+08	6.87259e+07	1.858e+07	6.84192e+07	4.71137e+07
261	M91T94	91.0392	94.144	1.57	1.76391e+06	2.92263e+06	1.2972e+07	9.00284e+06	1.74664e+06	2.53553e+06	2.3048e+07	8.42649e+06	2.2829e+07	2.47075e+07	4.73886e+07	6.07056e+06	3.57694e+07	5.76969e+06	5.42754e+07	2.81335e+07	4.69241e+07	3.18494e+07	3.6819e+07	2.56946e+07	3.52037e+07	2.92286e+07	3.91285e+07	4.26859e+07	4.55046e+07	2.87505e+07	3.53749e+07	3.77089e+07	1.98543e+07
262	M91T102	91.0392	102.443	1.71	1.73287e+07	3.60898e+07	1.09958e+07	2.17185e+07	1.82054e+07	3.33131e+07	2.65982e+07	7.10489e+06	2.82523e+07	4.35314e+07	7.55318e+06	7.35934e+06	2.83574e+07	1.07922e+07	2.1481e+07	9.37734e+06	4.68731e+07	3.24691e+07	3.02997e+07	2.75588e+07	6.64257e+07	4.20526e+07	5.17727e+07	4.95397e+07	3.14112e+07	8.49248e+06	4.17626e+07	7.80624e+06	2.44017e+07
263	M91T347	91.0542	346.77	5.78	4.9366e+07	4.67909e+07	5.02063e+07	4.71238e+07	5.61438e+07	4.98137e+07	4.81487e+07	4.59897e+07	4.25661e+07	4.32465e+07	4.33335e+07	4.31009e+07	3.24046e+07	3.30707e+07	3.57763e+07	3.4714e+07	2.9746e+07	3.47629e+07	3.21302e+07	3.07924e+07	2.99761e+07	3.71819e+07	3.50326e+07	3.53309e+07	4.03854e+07	4.02161e+07	4.76402e+07	4.70312e+07	4.67029e+07
264	M91T90	91.0585	90.1468	1.5	1.22966e+07	3.68229e+06	1.2612e+07	1.74492e+07	1.12095e+07	2.60742e+06	1.14023e+08	1.0301e+08	8.37539e+07	1.04692e+08	9.38956e+07	1.14069e+08	1.33112e+08	1.3625e+08	1.43281e+08	1.54202e+08	1.54103e+08	1.24512e+08	1.15746e+08	1.15058e+08	1.24705e+08	1.08608e+08	1.06365e+08	1.19695e+08	9.80602e+07	9.25147e+07	9.35022e+07	8.8534e+07	9.77576e+07
265	M91T237	91.0541	237.449	3.96	2.31348e+08	2.50024e+08	2.54426e+08	2.62918e+08	2.49961e+08	2.76239e+08	2.92825e+08	3.5234e+08	2.43525e+08	3.02859e+08	3.71354e+08	3.82983e+08	3.91754e+08	3.56962e+08	2.60718e+08	2.97692e+08	3.23674e+08	2.83905e+08	3.15839e+08	3.90557e+08	3.82126e+08	3.30673e+08	2.54842e+08	3.36148e+08	3.20691e+08	3.06964e+08	3.01122e+08	3.1356e+08	3.16874e+08
266	M91T539	91.0542	539.294	8.99	6.2257e+07	4.04441e+07	4.15962e+07	4.06511e+07	4.50292e+07	4.39258e+07	5.74101e+07	4.69495e+07	3.95196e+07	4.4551e+07	5.33831e+07	5.45005e+07	3.86648e+07	4.06024e+07	3.94547e+07	3.97011e+07	4.11189e+07	4.10739e+07	1.57884e+08	4.83457e+07	3.83093e+07	4.31154e+07	4.30666e+07	4.14491e+07	4.41257e+07	4.38578e+07	4.63621e+07	4.34284e+07	5.09117e+07
267	M91T215	91.0543	215.382	3.59	9.45764e+07	2.07788e+07	1.1397e+08	2.46574e+07	8.33653e+07	7.91969e+07	1.05019e+08	1.22415e+08	1.0635e+08	1.17941e+08	1.18225e+08	1.17549e+08	1.03433e+08	1.33975e+08	7.23503e+07	6.07449e+07	2.79008e+07	1.04464e+08	1.31262e+08	9.03038e+07	1.46825e+08	1.05437e+08	9.81031e+07	1.28525e+08	1.18482e+08	8.02365e+07	2.6292e+07	1.06573e+08	1.21813e+08
268	M91T458	91.0544	457.514	7.63	6.09683e+07	1.11775e+08	1.36596e+08	6.83029e+07	1.31913e+08	1.24808e+08	1.5806e+07	8.79696e+07	1.1126e+08	1.06885e+08	1.3457e+08	1.19087e+08	1.05266e+08	1.09304e+08	1.11221e+08	1.05492e+08	1.00528e+08	9.6443e+07	6.93072e+07	7.23814e+07	6.89208e+07	1.82348e+08	1.93239e+07	6.20543e+07	1.48791e+07	1.6253e+07	1.25698e+08	7.55908e+07	1.69926e+07
269	M91T409	91.0541	408.794	6.81	7.16266e+07	3.11784e+07	4.53683e+07	2.97545e+07	4.00528e+07	3.07643e+07	3.04578e+07	2.85881e+07	2.61221e+07	6.48003e+07	2.93112e+07	2.47433e+07	1.93431e+07	2.07179e+07	5.72359e+07	2.10142e+07	1.92854e+07	2.01292e+07	4.93184e+06	1.87923e+07	1.94076e+07	2.44952e+07	2.05945e+07	1.98278e+07	2.12729e+07	2.62595e+07	6.68985e+07	6.75879e+07	2.88216e+07
270	M91T475	91.0544	474.959	7.92	4.70884e+07	4.84504e+07	3.88505e+07	4.92785e+07	3.72561e+07	4.58701e+07	6.35726e+06	3.67212e+07	4.65966e+07	4.64258e+07	3.88983e+07	4.56198e+07	3.69804e+07	3.79084e+07	2.86574e+07	3.43285e+07	3.59927e+07	3.28308e+07	3.0551e+07	3.56122e+07	7.81241e+06	8.36606e+06	7.01766e+06	4.53708e+07	7.36975e+06	5.34041e+06	3.81401e+07	4.30298e+07	5.82111e+06
271	M91T496	91.0542	495.999	8.27	4.42265e+07	4.39694e+07	4.7636e+07	4.66352e+07	4.75681e+07	4.34068e+07	4.79747e+06	2.85035e+07	2.81288e+07	2.98439e+07	2.95224e+07	3.2578e+07	2.51355e+07	2.71359e+07	2.89293e+07	2.48649e+07	4.82083e+07	2.29209e+07	4.97407e+06	3.24469e+07	6.36114e+06	3.36821e+07	4.40923e+06	2.90732e+07	5.60337e+06	4.85013e+06	6.78507e+07	6.29724e+07	2.34888e+07
272	M91T619	91.0542	619.024	10.32	1.65188e+07	4.33361e+06	2.04673e+07	1.80753e+07	1.56407e+07	1.69464e+07	2.72207e+07	2.52768e+07	2.44439e+07	2.49426e+07	2.73067e+07	2.22247e+07	9.92722e+06	2.82798e+06	1.32999e+07	1.19341e+07	2.56978e+06	2.34827e+06	2.73436e+06	7.562e+06	2.71946e+06	1.13845e+07	1.02124e+07	2.28378e+06	1.55367e+07	1.56296e+07	1.68205e+07	1.62459e+07	1.6211e+07
273	M91T517	91.0543	517.059	8.62	4.51288e+07	5.11109e+07	4.90158e+07	5.52177e+07	5.35462e+07	6.3304e+07	4.79566e+07	5.68368e+07	5.65988e+07	5.98582e+07	6.36295e+07	6.75088e+07	4.91115e+07	5.3087e+07	5.0049e+07	4.8761e+07	4.8711e+07	4.41892e+07	8.04826e+06	3.13481e+07	3.44669e+07	3.15058e+07	2.60267e+07	2.88951e+07	4.77001e+07	4.77528e+07	4.83925e+07	4.98491e+07	4.73981e+07
274	M91T584	91.0543	584.422	9.74	2.55623e+07	2.60168e+07	2.74379e+07	2.48772e+07	2.5088e+07	2.37081e+07	4.60288e+06	4.90035e+06	4.28128e+06	1.83725e+07	4.77434e+06	1.91627e+07	1.7897e+07	3.90032e+06	1.95527e+07	3.09064e+07	3.36286e+06	3.48926e+06	2.91346e+06	1.50379e+07	3.84046e+06	1.45301e+07	1.50339e+07	3.1052e+06	3.85387e+06	1.81466e+07	2.31586e+07	2.07605e+07	1.66821e+07
275	M91T559	91.0542	558.975	9.32	3.2617e+07	2.6931e+07	3.53845e+07	3.18188e+07	3.31413e+07	3.02513e+07	4.41009e+06	4.72114e+06	4.71698e+06	3.2356e+07	4.11705e+06	1.73214e+07	1.50725e+07	4.16622e+06	1.90592e+07	1.54653e+07	3.26066e+06	3.937e+06	2.99725e+06	1.99478e+07	3.6639e+06	2.6338e+07	2.84802e+07	3.38942e+06	2.04485e+07	4.49203e+06	1.81425e+07	2.05447e+07	3.36017e+07
276	M91T693	91.0542	692.86	11.55	3.39986e+06	2.85652e+06	1.61184e+07	1.33594e+07	1.5996e+07	3.02895e+06	1.49342e+07	1.92959e+07	2.54732e+06	1.76658e+07	1.8807e+07	1.91442e+07	7.8059e+06	2.3353e+06	1.46856e+07	9.61714e+06	2.569e+06	1.93954e+06	1.9074e+06	5.43419e+07	1.97032e+06	8.29086e+06	2.14991e+06	2.34278e+06	2.78789e+06	2.61008e+06	1.31994e+07	1.23279e+07	1.19337e+07
277	M91T36	91.0949	36.4294	0.61	5.76054e+06	1.03422e+07	2.68473e+06	5.39131e+06	8.52773e+06	4.86593e+06	8.31906e+06	5.32437e+06	7.02967e+06	1.0023e+07	2.60306e+06	1.06359e+07	5.95015e+06	6.72493e+06	2.42353e+06	9.06154e+06	9.41954e+06	2.23736e+06	2.64289e+06	2.4204e+06	5.99064e+06	2.76352e+06	2.42079e+06	1.07851e+07	1.2562e+06	1.77779e+06	2.07477e+06	5.88324e+06	7.65492e+06
278	M92T33_1	91.5048	32.9042	0.55	2.65957e+07	2.76191e+07	2.89789e+07	2.73951e+07	2.19604e+07	2.96128e+07	2.67694e+07	2.25473e+07	3.10479e+07	2.52185e+07	2.63209e+07	2.4204e+07	3.97629e+06	2.76402e+07	1.9534e+07	2.77764e+07	2.85169e+07	7.68677e+06	2.87581e+07	2.47482e+07	2.6836e+07	2.67199e+07	3.11599e+07	2.83816e+07	3.29298e+07	3.04281e+07	6.57514e+06	3.02454e+07	2.57832e+07
279	M92T791	91.5044	790.575	13.18	2.14339e+08	8.46186e+07	9.35776e+07	8.67131e+07	2.57789e+07	9.70978e+07	9.42542e+07	8.84867e+07	9.13901e+07	4.79569e+08	5.41334e+08	6.6403e+07	3.29395e+08	1.94455e+08	2.6945e+07	2.86106e+07	2.67077e+07	1.28965e+08	1.10851e+08	2.16963e+08	8.56186e+07	1.19006e+08	1.12352e+08	1.08316e+08	9.72037e+07	2.60749e+07	9.92364e+07	1.6279e+08	1.13723e+08
280	M92T828	91.5044	827.884	13.8	9.85752e+07	2.9678e+07	1.27351e+08	2.63733e+07	2.85775e+07	6.93915e+07	9.47689e+07	6.7153e+07	1.72615e+08	2.46109e+07	2.05394e+08	2.77832e+07	6.95968e+07	2.59153e+07	2.59516e+07	3.25569e+07	1.02254e+08	2.88026e+07	1.0043e+08	1.2987e+08	1.19606e+08	2.85222e+07	2.90474e+08	1.45704e+08	1.2942e+08	6.48315e+07	2.81547e+07	2.89178e+07	2.42415e+08
281	M92T777	91.5045	776.953	12.95	2.34425e+07	1.80477e+08	2.44102e+07	1.96939e+08	7.23238e+08	7.10801e+07	2.71061e+07	1.43069e+08	8.39069e+07	2.44415e+07	2.64911e+07	7.32339e+07	2.9275e+07	9.74492e+07	2.70964e+07	9.80342e+07	5.55251e+08	7.41781e+07	1.07535e+08	3.42877e+07	2.64085e+07	5.81562e+07	1.07526e+08	2.55154e+08	9.98497e+07	4.99732e+07	6.37885e+07	2.35243e+07	6.865e+07
282	M92T758	91.5044	757.637	12.63	1.75248e+07	9.92658e+07	8.73788e+07	1.06099e+08	1.85568e+07	1.762e+07	2.01892e+07	9.36463e+07	8.01001e+07	1.50583e+07	1.84535e+07	5.74261e+07	1.87598e+08	4.99783e+07	2.09256e+07	1.5847e+07	1.62714e+07	6.34902e+07	1.73617e+07	5.65654e+07	1.51287e+07	1.5468e+07	6.01927e+07	1.69194e+07	6.82786e+07	4.83991e+07	2.10173e+07	7.01545e+07	6.08936e+07
283	M92T746	91.5046	745.747	12.43	5.54445e+07	1.3866e+07	4.82513e+07	4.20152e+07	1.6121e+07	1.31443e+08	4.83369e+07	4.94754e+07	5.04952e+07	1.15969e+07	1.51067e+07	6.7936e+07	1.56709e+07	5.82595e+07	1.58513e+07	7.16449e+07	1.45621e+07	5.82764e+07	1.37913e+07	7.12653e+07	1.30748e+07	4.92376e+07	6.88825e+07	1.42289e+07	7.58458e+07	4.4593e+07	9.03162e+07	4.08216e+07	6.91142e+07
284	M92T803	91.5045	803.255	13.39	2.20773e+07	2.49464e+07	7.79976e+07	2.56862e+07	2.29854e+07	9.80181e+07	6.30477e+07	2.36109e+07	6.26194e+07	2.05568e+07	2.52602e+07	7.67289e+07	2.10762e+07	2.13687e+07	2.38564e+07	1.16725e+08	2.25711e+07	6.74088e+07	1.35655e+08	1.22537e+08	6.30741e+07	7.37807e+07	2.44693e+07	9.88161e+07	1.90427e+08	2.30357e+08	8.41369e+07	2.35747e+07	9.2921e+07
285	M92T76	91.5426	76.2831	1.27	1.35268e+08	1.29068e+08	1.33153e+08	1.34582e+08	1.27885e+08	1.48103e+08	1.34205e+08	1.33933e+08	1.62415e+08	1.36486e+08	1.5255e+08	1.45821e+08	1.36034e+08	1.32515e+08	1.28743e+08	1.14422e+08	1.13521e+08	1.34913e+08	1.5707e+08	1.58901e+08	1.53662e+08	1.56271e+08	1.49511e+08	1.38508e+08	1.47416e+08	1.6711e+08	1.43146e+08	1.31538e+08	1.4565e+08
286	M92T33_2	92.0371	32.896	0.55	1.45188e+07	2.63409e+06	8.17881e+06	8.83417e+06	2.50306e+06	2.41588e+06	6.91245e+06	7.73117e+06	2.14064e+06	9.80789e+06	7.27463e+06	7.51833e+06	1.01516e+07	7.35105e+06	7.97448e+06	8.25398e+06	6.57839e+06	7.45783e+06	7.35553e+06	2.43542e+06	9.2453e+06	8.82617e+06	2.0243e+06	2.48983e+06	1.12016e+07	2.08436e+06	1.23224e+07	6.78183e+06	7.47165e+06
287	M92T97	92.0495	97.3403	1.62	5.68233e+07	5.16533e+07	6.28586e+07	7.21674e+07	6.83366e+07	5.95777e+07	5.51674e+07	5.48469e+07	5.64119e+07	5.032e+07	6.79925e+06	4.4891e+07	4.91926e+07	4.73084e+07	1.16571e+07	5.23096e+07	4.8056e+07	1.34528e+07	6.18839e+07	1.13599e+07	1.22516e+07	3.92884e+07	4.75973e+07	1.24969e+07	5.20488e+07	5.2672e+07	4.27603e+07	4.44311e+07	5.60906e+07
288	M92T238	92.0578	237.5	3.96	1.44827e+07	1.39284e+07	1.45076e+07	1.20624e+07	1.51185e+07	1.48682e+07	1.67311e+07	1.50359e+07	1.55035e+07	1.96805e+07	1.53634e+07	2.28755e+07	2.43183e+07	2.02831e+07	1.89053e+07	3.39042e+06	2.52518e+07	1.37023e+07	2.04944e+07	2.41487e+07	2.71394e+07	2.13151e+07	9.55461e+06	2.33538e+07	1.52297e+07	2.04645e+07	1.93998e+07	1.94975e+07	1.0379e+07
289	M93T103	93.0337	102.622	1.71	1.58246e+07	1.21526e+07	1.15515e+07	3.10064e+06	1.62647e+07	1.92223e+07	1.94239e+07	3.18442e+07	2.18935e+07	2.78577e+07	4.11299e+07	2.39178e+07	1.98009e+06	2.07498e+06	9.05861e+06	2.67947e+06	4.91273e+06	1.70302e+07	1.44151e+07	1.66546e+07	2.8497e+06	3.19035e+06	2.05223e+06	4.41993e+06	2.4579e+07	1.95224e+07	1.90012e+07	1.31807e+07	4.3895e+06
290	M93T97	93.0573	97.3403	1.62	1.19824e+08	1.42245e+08	1.26362e+08	1.25973e+08	1.24847e+08	1.20591e+08	1.04222e+08	1.02411e+08	1.03046e+08	1.19463e+08	1.05952e+08	9.53804e+07	1.01741e+08	1.03322e+08	1.05208e+08	1.22913e+08	9.71663e+07	1.04188e+08	1.11921e+08	1.01481e+08	9.3114e+07	9.7889e+07	9.66094e+07	1.0241e+08	1.05495e+08	1.05066e+08	1.0568e+08	9.82246e+07	1.16125e+08
291	M93T347	93.0697	346.77	5.78	2.59692e+07	3.22483e+07	2.71766e+07	2.81101e+07	2.95542e+07	2.61926e+07	2.44164e+07	2.35467e+07	2.31739e+07	2.12727e+07	1.97244e+07	2.92074e+07	1.77279e+07	2.0901e+07	2.28985e+07	2.13175e+07	1.85333e+07	1.9253e+07	1.93974e+07	2.50471e+07	1.82002e+07	2.15886e+07	1.95679e+07	1.61165e+07	2.44808e+07	2.0331e+07	2.03982e+07	2.40715e+07	2.36732e+07
292	M93T237	93.0698	237.343	3.96	1.96981e+08	1.88379e+08	1.9507e+08	2.24062e+08	2.22514e+08	2.22527e+08	2.57811e+08	2.84043e+08	2.10351e+08	2.81531e+08	3.21866e+08	3.20473e+08	3.38026e+08	3.02555e+08	2.18117e+08	2.20534e+08	2.67494e+08	2.4764e+08	2.94411e+08	3.66464e+08	3.18749e+08	2.83499e+08	2.04224e+08	4.03131e+08	2.53776e+08	3.58387e+08	2.48087e+08	2.37519e+08	2.90445e+08
293	M93T443	93.07	442.934	7.38	1.42783e+07	1.33606e+07	1.45887e+07	4.4472e+06	2.8132e+07	3.91629e+06	1.89e+07	9.84475e+06	1.12016e+07	1.13357e+07	1.28366e+07	1.20749e+07	8.62463e+06	2.79615e+06	2.47266e+06	1.03652e+07	1.0579e+07	1.06212e+07	2.36227e+06	2.36402e+07	1.40681e+07	2.63367e+06	1.27447e+07	1.54475e+07	1.32254e+07	1.95691e+07	2.97241e+06	1.11313e+07	1.74526e+07
294	M93T215	93.07	214.72	3.58	5.31574e+07	1.22788e+07	7.0497e+07	6.33469e+07	1.43141e+07	7.54843e+07	3.24158e+07	4.27625e+07	1.41017e+07	6.1462e+07	7.52054e+07	8.30213e+07	7.4858e+07	5.55003e+07	1.60378e+07	9.59713e+07	1.00041e+08	7.78829e+07	6.1139e+07	8.41446e+07	6.13172e+07	2.07125e+07	1.56635e+07	2.23797e+07	8.6483e+07	1.75312e+07	8.11127e+07	1.74705e+07	1.87104e+07
295	M93T456	93.07	456.246	7.6	3.04643e+06	1.16364e+07	2.69133e+06	3.63253e+06	9.37368e+06	3.30898e+06	1.99407e+06	1.83545e+07	2.78826e+06	1.38374e+07	1.95749e+07	1.37592e+07	2.35139e+06	1.20965e+07	2.16676e+06	8.70383e+06	1.18637e+07	2.92011e+06	1.40812e+07	1.25435e+07	1.48406e+07	1.11468e+07	2.49611e+06	1.32398e+07	1.24857e+07	2.00064e+06	1.47684e+07	2.86605e+06	1.91898e+06
296	M94T270	93.5075	270.121	4.5	1.40014e+06	7.69501e+06	1.68683e+06	7.46031e+06	7.56257e+06	1.50144e+06	4.53032e+06	1.592e+06	5.20659e+06	7.81174e+06	1.25728e+06	1.49074e+07	5.84281e+06	1.46065e+06	4.13139e+06	892496	4.39995e+06	1.3302e+06	1.3728e+06	1.45929e+06	1.79478e+06	5.14693e+06	5.53616e+06	1.18639e+06	5.67713e+06	7.94647e+06	9.68991e+06	3.53291e+06	8.69868e+06
297	M94T76_1	93.5344	76.2831	1.27	8.89842e+07	8.76701e+07	7.17708e+07	9.09284e+07	8.01643e+07	8.38171e+07	8.53674e+07	8.89193e+07	8.80113e+07	9.32255e+07	8.95628e+07	8.51398e+07	8.18876e+07	8.10456e+07	7.12926e+07	7.18845e+07	7.61236e+07	7.90748e+07	9.55039e+07	8.5843e+07	1.01975e+08	8.38578e+07	7.92855e+07	4.17059e+07	1.01559e+08	8.73878e+07	8.91968e+07	8.56447e+07	8.16628e+07
298	M94T214	93.9991	214.426	3.57	1.0571e+07	4.53985e+07	6.51902e+06	4.03228e+07	4.22126e+07	1.90409e+07	3.78797e+07	2.14732e+07	6.60662e+06	1.79076e+07	2.12908e+07	2.16936e+07	1.67091e+07	1.89138e+07	1.8901e+07	2.79909e+07	7.16535e+06	1.41219e+07	1.19343e+07	3.12076e+07	1.35018e+07	3.17073e+07	7.17417e+06	1.28396e+07	1.81499e+07	2.42095e+07	3.13317e+07	6.03278e+06	3.38696e+07
299	M94T222	93.9991	222.424	3.71	1.43461e+07	7.57767e+06	4.14389e+07	6.74195e+06	6.85639e+06	1.92658e+07	6.92297e+06	6.41541e+06	7.75315e+06	2.24403e+07	1.5956e+07	7.32628e+06	1.79353e+07	1.34651e+07	1.65012e+07	8.27097e+06	7.99137e+06	1.80759e+07	8.56633e+06	5.93494e+06	1.71335e+07	6.51023e+06	3.67915e+07	1.03065e+07	1.66346e+07	6.98416e+06	7.05934e+06	3.40297e+07	6.48655e+06
300	M94T35	94.0451	35.0267	0.58	2.63956e+08	2.35766e+08	2.54601e+08	2.60064e+08	2.48407e+08	2.73966e+08	2.97217e+08	3.00195e+08	3.0382e+08	2.56538e+08	2.64847e+08	2.87562e+08	2.40213e+08	2.58256e+08	2.20213e+08	1.94911e+08	2.62852e+08	2.84451e+08	2.28633e+08	2.9473e+08	2.21914e+08	2.65389e+08	2.50874e+08	2.48741e+08	2.53914e+08	2.39447e+08	2.81374e+08	2.38079e+08	2.51855e+08
301	M94T76_2	94.045	76.3716	1.27	7.98843e+09	8.25895e+09	7.77715e+09	8.17207e+09	8.67213e+09	8.78761e+09	9.16236e+09	8.87037e+09	9.11769e+09	8.82375e+09	8.44715e+09	9.02819e+09	7.63523e+09	8.1047e+09	7.84377e+09	8.58273e+09	7.79447e+09	7.88396e+09	9.61201e+09	9.28496e+09	9.89634e+09	1.04112e+10	9.63627e+09	1.0543e+10	9.25506e+09	8.69879e+09	9.31797e+09	9.23776e+09	9.09732e+09
302	M94T60	94.0452	60.0793	1	1.26238e+08	8.90159e+07	1.15167e+08	1.35178e+08	1.19202e+08	2.14844e+07	7.16813e+07	9.3645e+07	2.30364e+07	1.10847e+08	1.24661e+08	2.29892e+07	8.49201e+07	2.37347e+07	1.23553e+08	1.00708e+08	2.41196e+07	1.07797e+08	1.02993e+08	7.67244e+07	8.29398e+07	8.89048e+07	9.39524e+07	2.55417e+07	2.02625e+08	6.56509e+07	1.07051e+08	9.27485e+07	7.79623e+07
303	M94T531	94.0449	530.684	8.84	8.77415e+07	3.61097e+08	4.43239e+08	5.0385e+08	3.14742e+08	9.59425e+07	5.07372e+08	5.19321e+08	5.24098e+08	4.91343e+08	3.55275e+08	7.54339e+08	5.06129e+08	2.66239e+08	1.03347e+08	5.25124e+08	1.54364e+09	1.02023e+08	4.45101e+08	1.42918e+09	1.01634e+08	3.24969e+08	8.65644e+08	4.92069e+08	1.41749e+09	4.79498e+08	1.91875e+09	4.54602e+08	2.14118e+09
304	M94T633	94.045	633.474	10.56	1.37564e+09	5.48652e+08	4.01061e+08	1.25242e+08	4.81646e+08	1.39573e+08	7.81936e+08	4.93257e+08	8.05524e+08	4.85345e+08	1.13943e+09	1.3244e+08	6.00147e+08	4.96201e+08	1.18369e+08	6.04821e+08	1.4524e+08	3.77875e+08	3.13192e+08	4.43805e+08	1.27747e+08	4.91609e+08	1.28451e+08	1.04161e+09	4.00951e+08	9.02782e+08	6.04228e+08	7.97648e+08	5.08055e+08
305	M94T663	94.0449	662.655	11.04	1.6812e+09	1.44506e+08	1.08641e+09	5.38336e+08	1.58684e+08	1.08863e+09	4.91941e+08	3.61687e+08	1.48822e+08	1.28943e+08	1.6248e+08	1.38257e+08	1.42536e+08	1.421e+08	1.33539e+08	5.18745e+08	1.46449e+08	6.40115e+08	1.65996e+08	5.56826e+08	2.93845e+09	5.30385e+08	4.87351e+08	1.47789e+08	1.0773e+09	4.17353e+08	6.55623e+08	1.44811e+08	1.44971e+08
306	M94T688	94.0449	687.969	11.47	6.73237e+08	2.13201e+08	1.66051e+09	3.90889e+08	2.82441e+09	6.44357e+08	2.20588e+08	8.65625e+08	4.95862e+08	1.8472e+09	4.96366e+08	2.12713e+08	1.30521e+09	1.01106e+09	2.43286e+09	5.57264e+08	4.13577e+08	1.06168e+09	1.40943e+09	5.63805e+08	1.27317e+08	2.29974e+08	4.21796e+08	1.31209e+09	6.472e+08	3.43451e+08	6.49427e+08	2.0437e+08	6.04705e+08
307	M94T550	94.0449	550.272	9.17	9.57223e+07	2.75405e+08	6.55215e+08	2.87836e+08	8.87643e+07	8.02401e+07	9.22052e+07	9.17241e+07	4.98758e+08	9.58243e+07	3.5898e+08	7.26283e+08	3.30178e+08	9.82114e+07	4.65015e+08	7.26757e+08	1.08518e+08	1.02916e+08	4.84073e+08	9.934e+07	4.72111e+08	6.31222e+08	4.21122e+08	3.24428e+08	9.45221e+07	6.08509e+08	8.46275e+07	3.49869e+08	9.22876e+07
308	M94T670	94.0449	669.717	11.16	1.54828e+08	5.916e+08	1.51981e+08	4.17147e+08	1.54355e+08	1.53312e+08	5.84162e+08	5.16536e+08	1.4303e+08	7.29188e+08	1.4549e+08	1.3983e+08	4.96667e+08	6.81319e+08	1.44029e+08	6.42284e+08	1.40764e+08	7.26366e+08	7.30874e+08	4.8146e+08	1.47065e+08	2.54749e+08	4.24556e+08	1.80838e+09	1.44624e+08	3.54506e+08	4.88694e+08	4.91944e+08	1.87429e+09
309	M94T543	94.0449	543.451	9.06	1.83742e+09	4.2725e+08	9.00055e+07	3.72753e+08	7.56491e+08	7.49192e+08	8.72315e+07	3.45647e+08	3.45567e+08	4.14546e+08	4.06841e+08	8.88809e+07	4.0858e+08	8.26409e+07	3.84666e+08	9.12467e+07	9.20475e+07	1.01605e+09	3.73973e+08	8.38819e+07	3.22137e+08	8.44707e+07	9.1457e+07	8.36788e+07	8.88966e+07	8.66486e+07	9.08467e+07	3.57678e+08	8.70669e+07
310	M94T774	94.045	774.073	12.9	2.55383e+08	1.24195e+09	3.57589e+08	9.38566e+07	1.95895e+08	2.75668e+08	7.60834e+07	3.27817e+08	2.64238e+08	9.17145e+07	3.25007e+08	8.16966e+07	2.32357e+08	2.90152e+08	7.2445e+07	4.51103e+08	2.75205e+08	1.31487e+09	3.53417e+08	1.91144e+08	2.67167e+08	9.05261e+08	2.03825e+08	2.4605e+08	8.36916e+08	3.34799e+08	2.24957e+08	3.02459e+08	3.28159e+08
311	M94T580	94.0449	580.477	9.67	3.6515e+08	2.05416e+09	4.21113e+08	1.82174e+09	1.71315e+09	2.19703e+09	1.17688e+09	2.92006e+09	1.36197e+09	1.705e+09	1.73167e+09	4.13219e+08	8.36959e+08	1.21052e+09	6.97082e+08	2.96544e+09	4.0307e+08	2.84915e+09	3.61301e+08	4.12145e+08	2.64344e+09	1.74604e+09	6.07801e+08	6.90799e+08	1.90594e+09	3.72205e+08	1.77678e+09	2.44927e+09	1.10729e+09
312	M94T739	94.0449	738.616	12.31	7.2026e+08	1.52804e+08	7.97529e+08	3.73426e+09	1.20038e+09	1.34338e+08	1.31698e+08	3.37906e+08	1.26025e+08	3.36645e+08	5.89523e+08	1.33616e+08	3.93769e+08	1.1623e+08	9.49344e+07	1.50589e+08	3.3253e+08	5.09278e+08	1.57896e+08	1.2619e+08	8.61021e+08	5.30583e+08	1.08689e+09	2.08175e+09	7.2703e+08	1.3167e+08	1.25426e+08	1.31565e+08	3.85299e+08
313	M94T645	94.0449	644.842	10.75	1.40574e+08	1.42409e+08	6.99232e+08	7.30855e+08	4.10343e+08	5.06773e+08	1.3982e+08	6.28028e+08	5.56741e+08	4.97775e+08	1.4488e+08	7.91401e+08	4.19965e+08	4.84403e+08	1.40808e+08	6.1603e+08	1.35432e+08	4.03003e+08	1.44446e+08	8.24542e+08	1.48681e+08	8.90649e+08	6.36728e+08	1.45959e+08	9.79312e+08	1.07521e+08	5.36878e+08	4.19456e+08	4.57653e+08
314	M94T817	94.0449	816.796	13.61	4.14303e+07	1.33746e+08	6.71264e+07	1.68253e+07	2.99463e+07	5.20248e+07	1.36181e+07	8.83347e+07	4.37715e+07	2.58413e+07	1.22111e+08	1.42008e+07	1.219e+08	4.02863e+07	3.51853e+07	1.23342e+08	8.55931e+07	1.36029e+07	9.58263e+07	3.53556e+07	6.60407e+07	1.75744e+07	6.56367e+07	1.56262e+07	6.76305e+07	5.45507e+07	4.6857e+07	4.79008e+07	1.2254e+08
315	M94T655	94.0449	655.073	10.92	1.39985e+08	8.31682e+08	1.46394e+08	6.77579e+08	1.39494e+08	1.42897e+08	9.77447e+08	1.49372e+08	1.02326e+09	6.31923e+08	1.81249e+09	4.8586e+08	6.23126e+08	4.87196e+08	1.43895e+08	5.6339e+08	2.96772e+09	4.65271e+08	1.10214e+09	4.84862e+08	1.57399e+08	1.53674e+08	4.95239e+08	1.32816e+08	1.38606e+08	1.99346e+08	1.51856e+08	5.65256e+08	1.47465e+08
316	M94T761	94.0449	760.707	12.68	4.98111e+08	1.29541e+08	5.22313e+08	1.32351e+08	1.16746e+08	1.19148e+08	1.13629e+08	5.67991e+08	4.4712e+08	8.78775e+08	7.19136e+08	1.86465e+09	2.77192e+08	2.75659e+08	2.81618e+08	1.2622e+08	7.04887e+08	1.31054e+08	1.32056e+08	3.50143e+08	4.05473e+08	3.85954e+08	2.80175e+08	1.34254e+08	1.25464e+08	1.17015e+08	4.78361e+08	1.26764e+08	5.97467e+08
317	M94T723	94.0449	723.408	12.06	1.55385e+08	6.60389e+08	5.71128e+08	1.71694e+08	6.38914e+08	1.50807e+08	4.67696e+09	1.53053e+08	2.99329e+09	6.44482e+08	1.33959e+09	1.46721e+08	1.42707e+08	2.16121e+09	1.49693e+08	1.57441e+08	1.45792e+08	6.9e+08	1.73671e+09	5.33754e+08	4.39739e+08	5.65038e+08	5.63889e+08	1.56345e+08	1.51574e+08	1.32844e+08	1.46782e+08	3.52436e+09	1.45858e+08
318	M94T832	94.0449	831.619	13.86	3.78725e+07	7.20998e+06	5.93836e+07	1.48809e+07	3.17653e+07	2.11314e+07	7.87401e+06	2.01084e+07	1.97439e+07	1.3318e+07	7.72188e+06	5.30427e+07	6.49532e+06	2.72393e+07	2.23749e+07	8.09697e+06	2.68269e+07	7.25319e+06	3.92462e+07	3.5023e+07	6.4094e+07	6.63268e+06	1.53606e+07	1.27568e+08	2.32219e+07	1.25208e+07	3.00038e+07	2.12799e+07	6.87914e+06
319	M94T621	94.045	621.414	10.36	7.77031e+08	4.30759e+08	4.01871e+08	9.84726e+08	9.44544e+08	1.29296e+09	4.20042e+08	1.29166e+08	1.35668e+08	3.1304e+08	1.39001e+08	1.08054e+09	5.09801e+08	7.30973e+08	9.49188e+08	1.39374e+08	1.58686e+08	1.32486e+08	4.26309e+08	1.43992e+08	1.41762e+08	3.8293e+08	5.70886e+08	5.78299e+08	6.18968e+08	5.45513e+08	4.28896e+08	1.38112e+08	3.59999e+08
320	M94T714	94.0449	713.669	11.89	6.62713e+08	1.52963e+08	8.04718e+08	1.76224e+08	1.81513e+08	1.56547e+08	1.73391e+08	1.71825e+08	1.62786e+08	1.59018e+08	1.57943e+08	1.64331e+08	1.31071e+09	1.44652e+08	1.82427e+09	1.73471e+08	1.16419e+09	4.81838e+08	7.56397e+08	5.72154e+08	3.89545e+08	4.42972e+08	6.42657e+08	1.75994e+08	1.09257e+09	1.39042e+08	1.17419e+09	1.85469e+08	1.44597e+09
321	M94T789	94.045	789.194	13.15	3.60437e+08	6.67169e+07	1.26297e+08	6.92259e+07	1.43697e+08	5.86114e+07	5.31089e+07	2.8438e+08	2.07496e+08	2.11198e+08	6.47738e+07	6.455e+07	2.40664e+08	1.13227e+08	4.22201e+08	4.45922e+08	1.90349e+08	6.3557e+07	6.59283e+07	1.68768e+08	5.10041e+08	6.91881e+07	2.51628e+08	6.48319e+07	4.40939e+08	2.30349e+08	2.80662e+08	6.20771e+07	4.27949e+08
322	M94T97	94.0653	97.167	1.62	4.19716e+08	4.6421e+08	4.51238e+08	4.35225e+08	4.57088e+08	4.59984e+08	4.55056e+08	4.13456e+08	3.85438e+08	4.54781e+08	4.52767e+08	4.94767e+08	3.3998e+08	3.78103e+08	3.78423e+08	4.19612e+08	4.16243e+08	3.90986e+08	4.19637e+08	3.14972e+08	3.63921e+08	3.52722e+08	3.77749e+08	3.80001e+08	3.69211e+08	3.72472e+08	4.0229e+08	4.31187e+08	4.37132e+08
323	M94T238	94.0734	237.509	3.96	8.11074e+06	1.30153e+07	7.80232e+06	7.99188e+06	2.33658e+07	4.74335e+07	1.53673e+07	5.71586e+06	6.88952e+06	6.82669e+06	1.58186e+07	1.7683e+07	2.0709e+07	3.44479e+07	1.42462e+07	1.2623e+07	5.95404e+06	9.09914e+06	1.23336e+07	1.92818e+07	7.71039e+06	2.28762e+07	6.36383e+06	2.8905e+07	1.78642e+07	1.63875e+07	1.67823e+07	2.08676e+07	6.85977e+06
324	M95T35_1	94.5463	35.0579	0.58	4.88421e+07	5.32727e+07	4.87914e+07	5.16745e+07	4.67317e+07	4.15697e+07	4.60593e+07	4.59024e+07	6.21204e+07	5.63587e+07	5.15085e+07	4.80202e+07	4.08772e+07	4.96457e+07	4.1444e+07	3.95608e+07	3.8731e+07	4.86771e+07	4.6155e+07	4.52832e+07	4.68748e+07	4.55078e+07	5.11011e+07	5.96615e+07	5.02703e+07	4.72436e+07	4.34087e+07	4.63518e+07	4.8021e+07
325	M95T76_1	94.5463	76.3716	1.27	1.43512e+09	1.52674e+09	1.45818e+09	1.52446e+09	1.52881e+09	1.63428e+09	1.65543e+09	1.56911e+09	1.73284e+09	1.60691e+09	1.63039e+09	1.5931e+09	1.38296e+09	1.4786e+09	1.4876e+09	1.57548e+09	1.50552e+09	1.4633e+09	1.66338e+09	1.69547e+09	1.7902e+09	1.91587e+09	1.72124e+09	1.88648e+09	1.80131e+09	1.58483e+09	1.68973e+09	1.79869e+09	1.69729e+09
326	M95T60	94.5463	59.7	1	2.79626e+06	1.1705e+07	7.37974e+06	1.9534e+07	2.12154e+07	1.52959e+07	1.57203e+07	1.64533e+07	2.1888e+07	1.74686e+07	2.62267e+07	2.14132e+07	1.53284e+07	1.53887e+07	1.55727e+07	1.49235e+07	1.66166e+07	1.96807e+07	1.36287e+07	1.15206e+07	1.26217e+07	1.7717e+07	1.57559e+07	1.501e+07	2.75647e+06	2.85629e+06	1.16972e+07	2.83571e+06	2.39653e+07
327	M95T505	94.5462	505.471	8.42	7.77063e+07	1.04627e+07	8.22954e+07	4.62306e+07	6.39835e+07	1.10678e+07	7.39076e+07	7.06719e+07	5.06224e+07	8.62058e+07	7.21185e+07	6.67746e+07	1.15421e+07	9.3962e+07	1.31405e+07	1.32336e+07	9.47394e+07	1.20329e+07	1.26169e+07	1.08225e+07	4.77716e+07	1.13488e+07	1.20597e+07	8.73558e+07	7.97208e+07	8.05878e+07	7.15883e+07	1.1322e+07	4.78959e+07
328	M95T49	94.5462	49.4121	0.82	2.27363e+06	1.4388e+07	2.18452e+06	1.79995e+07	1.49199e+07	1.99194e+07	2.97041e+06	1.94166e+06	1.96749e+07	2.35499e+06	2.21227e+06	1.91097e+07	2.8586e+06	2.27899e+07	7.53431e+06	1.60961e+07	1.58178e+07	2.11299e+06	9.98002e+06	2.46608e+06	2.47331e+06	1.26214e+07	1.63036e+07	1.41204e+07	2.29638e+06	2.52673e+06	1.70636e+07	1.19872e+07	1.70023e+07
329	M95T734	94.5462	734.203	12.24	1.06872e+08	3.19136e+07	1.56831e+08	1.7669e+08	6.47149e+08	3.20771e+07	4.93083e+07	3.45075e+07	3.03201e+07	2.97356e+07	3.45366e+07	3.38097e+07	2.56325e+07	2.69286e+07	2.63443e+07	3.7324e+08	3.7207e+07	3.10132e+07	3.26673e+07	1.20471e+08	9.74109e+07	1.71643e+08	3.13237e+07	1.86938e+08	1.58393e+08	1.46839e+08	8.80942e+07	4.08536e+08	2.31455e+08
330	M95T688	94.5463	688.459	11.47	1.19387e+08	1.7476e+07	1.75708e+07	1.73695e+07	3.19834e+08	1.89143e+07	1.08375e+08	1.91384e+07	2.00132e+07	5.19472e+07	3.80916e+07	7.98114e+07	9.01648e+07	6.42802e+07	1.27524e+08	8.91797e+07	6.81547e+07	1.39407e+08	1.70499e+07	1.51329e+08	9.50201e+06	4.07029e+07	1.73552e+07	7.21641e+07	3.00336e+08	6.14344e+07	1.641e+07	1.73507e+07	8.88994e+07
331	M95T76_2	95.044	76.3404	1.27	1.22477e+09	1.24774e+09	1.19934e+09	1.23085e+09	1.30154e+09	1.30234e+09	1.37107e+09	1.328e+09	1.32207e+09	1.34353e+09	1.26633e+09	1.32716e+09	1.14881e+09	1.27602e+09	1.17459e+09	1.31643e+09	1.23576e+09	1.16811e+09	1.37369e+09	1.39832e+09	1.44015e+09	1.59223e+09	1.47466e+09	1.63156e+09	1.39033e+09	1.27401e+09	1.38939e+09	1.4091e+09	1.36812e+09
332	M95T237	95.0492	237.343	3.96	2.68916e+08	4.29425e+08	2.65504e+08	2.63794e+08	2.8437e+08	4.96339e+08	3.14938e+08	3.85854e+08	2.97547e+08	3.81199e+08	4.07667e+08	3.88214e+08	4.9756e+08	4.64179e+08	3.05778e+08	2.80059e+08	5.32081e+08	3.14331e+08	5.50938e+08	4.27194e+08	4.18027e+08	3.68154e+08	3.16124e+08	3.91216e+08	4.81952e+08	5.26406e+08	3.457e+08	3.43308e+08	3.64118e+08
333	M95T347	95.0488	346.768	5.78	6.06718e+07	5.01826e+07	5.43537e+07	4.84853e+07	5.72776e+07	5.13527e+07	5.28565e+07	4.71593e+07	4.85267e+07	5.07707e+07	4.80216e+07	5.68344e+07	4.18007e+07	4.14394e+07	4.61576e+07	4.2642e+07	3.84486e+07	3.93817e+07	4.2265e+07	4.45436e+07	4.04855e+07	5.22839e+07	4.67828e+07	4.78807e+07	4.46976e+07	4.65114e+07	5.16531e+07	5.4082e+07	1.10288e+08
334	M95T102	95.0492	102.497	1.71	2.4465e+08	2.33469e+08	2.36876e+08	2.03204e+08	2.50101e+08	2.30608e+08	3.17954e+08	3.628e+08	3.97568e+08	4.22551e+08	4.11627e+08	3.65506e+08	2.33802e+08	1.87835e+08	2.44666e+08	2.61628e+08	1.91072e+08	2.17475e+08	2.56531e+08	2.92012e+08	3.12417e+08	2.37132e+08	2.24883e+08	2.61287e+08	2.39209e+08	2.62227e+08	2.59308e+08	2.22555e+08	2.45176e+08
335	M95T35_2	95.0441	35.0615	0.58	4.09567e+07	3.68832e+07	3.94676e+07	4.14113e+07	3.51939e+07	8.80873e+06	3.57001e+07	3.8109e+07	3.95764e+07	3.31467e+07	4.21786e+07	3.43264e+07	8.40054e+06	3.2897e+07	3.07229e+07	3.34092e+07	3.26286e+07	4.23907e+07	9.20602e+06	9.64502e+06	3.65328e+07	9.78755e+06	4.18182e+07	4.07645e+07	3.45698e+07	1.03721e+07	3.12971e+07	4.19209e+07	3.69459e+07
336	M95T216	95.049	215.516	3.59	8.69404e+07	3.07948e+07	1.18279e+08	1.45263e+08	9.69941e+07	3.3982e+07	9.64425e+07	1.55358e+08	1.36335e+08	1.65524e+08	1.51725e+08	1.59536e+08	4.36327e+07	4.1644e+07	1.10472e+08	1.45288e+08	3.86364e+07	1.23758e+08	4.07469e+07	1.71019e+08	1.99199e+08	1.94888e+08	3.78658e+07	1.11742e+08	3.28343e+07	3.59689e+07	1.59164e+08	1.63719e+08	1.66406e+08
337	M95T59	95.0441	59.3184	0.99	1.79273e+07	1.32508e+07	7.92166e+06	1.39544e+07	2.42533e+07	7.56039e+06	1.39525e+07	1.28185e+07	2.08992e+07	8.09822e+06	1.21364e+07	9.34413e+06	9.5118e+06	5.09159e+07	3.07498e+07	1.2976e+07	9.91081e+06	2.59319e+07	8.97801e+06	9.61704e+06	1.99516e+07	3.14104e+07	1.47058e+07	1.02082e+07	2.07527e+07	5.92773e+06	7.88782e+06	3.53123e+07	1.11812e+07
338	M95T47	95.0442	47.2975	0.79	1.21546e+07	1.38521e+07	1.38097e+07	1.25911e+07	8.6702e+06	6.9792e+07	9.85516e+06	1.26528e+07	2.02873e+07	2.70004e+07	9.65792e+06	7.96607e+06	9.03133e+07	1.6332e+07	2.49852e+07	1.5471e+07	6.06413e+07	2.66049e+07	9.18852e+07	8.73231e+06	2.72681e+07	3.70862e+07	9.09676e+06	8.74566e+06	1.64195e+07	6.67431e+07	9.35866e+06	3.21706e+07	1.66529e+07
339	M95T831	95.0493	831.367	13.86	1.90605e+06	9.99721e+06	2.1709e+06	5.44631e+06	7.59676e+06	9.92651e+06	2.08299e+06	2.33412e+06	1.91948e+06	1.48518e+07	1.09607e+07	9.33223e+06	2.94486e+06	3.25954e+06	2.37045e+06	1.21167e+07	8.31078e+06	2.64407e+06	1.09853e+07	1.26439e+07	2.39076e+06	2.78695e+06	3.24277e+06	1.78621e+06	1.50076e+06	9.53749e+06	1.24984e+07	2.29465e+06	2.71248e+06
340	M95T388	95.0489	388.412	6.47	1.01986e+07	1.11143e+07	9.47932e+06	1.13766e+07	9.59879e+06	9.93733e+06	1.79375e+07	2.3144e+07	2.88534e+07	2.09657e+07	2.1595e+07	8.28107e+06	2.19971e+07	6.32023e+07	1.09045e+07	3.56733e+07	9.95616e+06	1.17489e+07	2.87095e+07	2.76178e+07	2.80905e+07	1.04222e+07	1.09979e+07	2.86034e+07	4.40192e+07	2.24121e+07	1.07127e+07	2.3205e+07	2.98968e+07
341	M95T297	95.049	296.606	4.94	4.825e+06	3.05943e+07	5.81276e+06	4.70808e+06	4.95594e+06	5.42789e+06	3.70649e+07	1.76979e+07	6.26507e+07	4.9778e+07	1.9376e+07	6.47351e+06	2.23407e+07	5.34719e+07	6.70244e+06	1.88636e+07	7.42439e+06	6.95345e+06	2.38296e+07	3.04595e+07	2.20489e+07	8.95736e+07	6.76876e+06	2.02668e+07	4.35001e+07	1.47939e+07	6.15436e+06	6.56362e+06	2.08968e+07
342	M95T191	95.049	191.261	3.19	6.46712e+06	2.97337e+07	6.17553e+06	6.46076e+06	5.5098e+06	5.62149e+06	4.69442e+07	2.26347e+07	2.88261e+07	3.13036e+07	4.00825e+07	8.83357e+06	5.0272e+07	2.52876e+07	8.81943e+06	8.55487e+06	8.83126e+06	7.4166e+06	4.33233e+07	3.73817e+07	2.1568e+07	4.58639e+07	9.28205e+06	3.4978e+07	1.76091e+07	4.15014e+07	8.18167e+06	4.58528e+07	8.56387e+07
343	M95T692	95.0442	692.209	11.54	2.85229e+08	1.57538e+08	1.39258e+08	1.02739e+08	9.26411e+07	1.07539e+08	3.02006e+07	8.92529e+07	9.02444e+07	7.7274e+07	3.12528e+07	7.23978e+07	9.69375e+07	2.29442e+07	1.53305e+08	5.78869e+07	5.42748e+07	1.86568e+08	3.3085e+07	6.93393e+07	4.38418e+07	1.45746e+07	2.66962e+08	1.74552e+08	2.9298e+07	1.24186e+08	2.34561e+08	1.7956e+08	3.22614e+07
344	M95T470	95.0857	470.42	7.84	8.313e+07	6.96369e+07	3.78476e+07	3.59123e+07	3.44962e+07	3.16938e+07	3.17799e+06	7.27713e+07	2.69316e+07	2.71255e+07	2.80764e+07	2.71415e+07	3.0489e+07	2.99046e+07	3.31225e+07	3.59488e+07	3.39778e+07	7.97512e+07	2.80224e+07	1.00904e+08	3.20872e+07	3.06583e+07	3.89171e+06	3.6044e+07	3.19286e+06	4.69773e+06	3.34916e+07	3.31967e+07	3.36895e+06
345	M95T461	95.0857	460.827	7.68	5.81297e+06	5.51702e+06	2.51788e+07	2.35041e+07	2.38779e+07	2.12524e+07	3.21372e+07	5.52719e+06	1.41273e+07	2.47981e+07	2.54621e+07	2.74866e+07	1.92125e+07	4.55048e+06	5.12066e+06	2.2125e+07	2.01016e+07	5.72062e+06	2.25786e+07	7.09084e+06	2.65641e+07	2.56566e+07	3.39809e+07	2.42032e+07	3.25647e+07	3.89537e+07	2.08143e+07	2.60778e+07	3.56133e+07
346	M95T751	95.0853	751.229	12.52	2.37526e+07	2.62848e+07	2.58137e+07	2.55217e+07	2.66682e+07	5.47384e+07	2.54793e+07	2.42238e+07	4.56936e+06	2.38115e+07	2.52496e+07	2.63609e+07	4.73114e+06	4.62325e+06	3.6407e+06	2.36976e+07	2.19604e+07	2.10759e+07	1.85842e+07	4.09835e+06	2.13678e+07	1.91646e+07	2.25839e+07	2.65992e+07	3.15424e+07	2.21939e+07	5.66457e+06	2.36929e+07	2.45015e+07
347	M95T32	95.0857	31.8795	0.53	5.4673e+06	5.69912e+06	5.03717e+06	1.33644e+06	7.14404e+06	5.00105e+06	5.42729e+06	1.4246e+06	1.27329e+06	1.33494e+06	6.00602e+06	5.21595e+06	1.89194e+06	5.03164e+06	1.50043e+06	1.65657e+06	5.99111e+06	5.48739e+06	5.9681e+06	1.42556e+06	1.01649e+06	4.07458e+06	1.09478e+06	3.64917e+06	1.09863e+06	5.63488e+06	4.11864e+06	6.739e+06	1.87874e+06
348	M95T838	95.0853	837.505	13.96	9.40878e+06	1.96326e+07	2.17044e+06	1.73672e+06	2.46799e+06	1.18846e+07	1.69577e+07	1.13954e+07	1.08539e+07	4.66656e+07	1.76437e+07	9.80974e+06	2.16569e+06	2.35058e+06	9.34909e+06	2.7347e+06	8.08013e+06	1.36303e+07	2.367e+06	2.62008e+07	1.65222e+07	9.81298e+06	1.32553e+07	8.22783e+06	2.3238e+06	1.0616e+07	7.57919e+06	9.55067e+06	2.79484e+06
349	M95T805	95.0853	805.169	13.42	1.74719e+07	4.12448e+07	6.39686e+06	6.06924e+06	6.16214e+06	7.36509e+07	7.07123e+07	1.50751e+07	5.90283e+07	3.77001e+07	5.2543e+07	5.12838e+07	9.7028e+07	5.34523e+06	3.82992e+07	5.93474e+06	2.09316e+07	2.16695e+07	2.16727e+07	2.61808e+07	6.56756e+07	2.47513e+07	2.92636e+07	1.66288e+07	1.49975e+07	2.3444e+07	2.54331e+07	2.88564e+07	1.71258e+07
350	M96T76	95.5457	76.4232	1.27	9.46955e+07	8.41001e+07	9.1097e+07	1.10567e+08	1.10866e+08	1.08043e+08	1.04827e+08	1.00136e+08	1.13005e+08	1.19831e+08	1.13062e+08	1.12921e+08	1.094e+08	1.02656e+08	1.08977e+08	1.12439e+08	1.05335e+08	9.89583e+07	5.5328e+07	1.2335e+08	1.19645e+08	1.45793e+08	1.28498e+08	1.50493e+08	1.35735e+08	9.57064e+07	1.12761e+08	1.23723e+08	1.15631e+08
351	M96T126	95.997	126.415	2.11	1.08278e+07	1.54452e+07	9.19763e+06	9.70634e+06	2.41004e+07	1.47689e+07	1.16203e+07	1.44893e+07	1.37906e+07	1.96318e+07	2.22016e+07	1.5049e+07	6.16675e+06	1.48197e+07	1.10382e+07	1.24805e+07	1.30219e+07	1.18804e+07	8.38611e+06	1.05814e+07	1.48295e+07	1.43622e+07	1.29322e+07	1.61102e+07	1.29787e+07	1.2366e+07	1.2705e+07	1.47431e+07	1.59997e+07
352	M96T237	96.0525	237.394	3.96	1.34064e+07	2.86238e+07	5.67718e+07	3.82417e+07	1.38404e+07	9.59273e+06	2.37315e+07	2.10159e+07	1.92281e+07	5.51495e+07	5.02411e+07	2.25302e+07	2.66204e+07	1.75337e+07	1.03338e+07	2.01129e+07	1.09491e+07	1.67479e+07	1.47451e+07	2.1596e+07	2.16559e+07	2.31931e+07	7.99065e+06	2.46349e+07	1.459e+07	2.26242e+07	2.28847e+07	3.02882e+07	2.61427e+07
353	M96T104_1	96.0446	103.562	1.73	8.34766e+06	9.23669e+06	1.23838e+07	5.53793e+07	1.06982e+07	9.15474e+06	6.83235e+07	2.41493e+07	3.67796e+07	1.86271e+08	2.92278e+07	1.97755e+07	1.02846e+07	3.75707e+07	8.44285e+06	1.1014e+07	1.11418e+07	1.16244e+07	1.31439e+07	1.21315e+07	8.40592e+06	1.1908e+07	1.10315e+07	7.41171e+07	1.48015e+07	1.14399e+07	1.2585e+07	5.30116e+07	1.22809e+07
354	M96T104_2	96.0809	103.58	1.73	3.53048e+07	6.80388e+07	7.06547e+07	1.74532e+07	6.69877e+07	5.18919e+07	1.50209e+07	3.00475e+07	1.46034e+07	7.10655e+07	1.30026e+08	4.60651e+07	8.11144e+07	1.08912e+08	4.86166e+07	4.9199e+07	3.8999e+07	1.09949e+08	3.73185e+07	6.62303e+07	4.70669e+07	1.40074e+07	1.03289e+08	4.18481e+07	5.25365e+07	3.42696e+07	1.37884e+07	3.85901e+07	7.00315e+07
355	M97T65	97.0077	64.7221	1.08	4.12195e+07	4.44233e+07	4.22187e+07	1.80036e+07	1.3657e+07	2.58484e+07	4.27958e+07	1.18645e+07	2.01423e+07	4.37659e+07	2.74547e+07	4.35751e+07	2.49054e+07	1.33629e+07	4.04535e+07	2.17921e+07	4.22513e+07	4.27857e+07	1.50913e+07	1.97808e+07	4.23297e+07	4.0556e+07	1.09908e+07	3.35372e+07	4.39325e+07	1.6023e+07	4.3851e+07	4.24217e+07	2.60776e+07
356	M97T94	97.0284	94.2078	1.57	5.5595e+08	5.35469e+08	5.29133e+08	1.36412e+08	5.10315e+08	5.51028e+08	1.93765e+09	2.36627e+09	4.3454e+08	4.22658e+09	2.21517e+09	1.96849e+09	4.53627e+09	3.29483e+09	3.33066e+09	7.20428e+09	3.27403e+09	3.08391e+09	4.60642e+09	3.43862e+09	8.15146e+09	3.10347e+09	3.37238e+09	3.14396e+09	2.80465e+09	3.84592e+09	2.95003e+09	2.39258e+09	6.3614e+08
357	M97T145	97.0284	145.106	2.42	3.99418e+08	9.73305e+08	3.82242e+08	7.43789e+08	6.48668e+08	3.32032e+08	2.14979e+09	5.10958e+08	1.12412e+09	3.76547e+08	7.6126e+08	5.96825e+08	4.30948e+09	1.63448e+09	3.71159e+08	3.68128e+08	2.17355e+09	1.77462e+09	1.25669e+09	1.58673e+09	1.68743e+09	2.23628e+09	5.10966e+09	5.22124e+09	5.91693e+08	2.83541e+09	1.00657e+09	5.48021e+08	3.48177e+09
358	M97T102	97.0283	101.772	1.7	1.45121e+09	1.46372e+09	1.41571e+09	2.27248e+09	1.48764e+09	1.42784e+09	1.95237e+09	2.13623e+09	2.30433e+09	5.20836e+08	2.15963e+09	1.9395e+09	7.79352e+08	3.15399e+09	3.15807e+09	8.3549e+08	3.44998e+09	3.49888e+09	8.58252e+08	3.43422e+09	8.90067e+08	3.5294e+09	3.66838e+09	3.94397e+09	2.29131e+09	6.88829e+08	2.74752e+09	2.6712e+09	2.90668e+09
359	M97T124	97.0285	123.601	2.06	2.57678e+08	1.02623e+08	8.42081e+08	4.79124e+08	7.23486e+08	8.31501e+08	1.67517e+08	8.41188e+08	7.71456e+08	7.63299e+08	1.81259e+08	8.76033e+08	3.61971e+08	1.25615e+09	1.37903e+09	2.56921e+09	1.34219e+09	2.9479e+09	1.89182e+09	1.99258e+09	4.94649e+08	1.28105e+09	3.81396e+08	4.24299e+08	1.26732e+09	2.08065e+08	7.1712e+08	7.33851e+08	2.87887e+08
360	M97T66	97.0398	66.1329	1.1	5.97852e+07	5.84716e+07	1.85015e+07	1.38518e+07	1.62607e+07	8.41075e+06	9.93724e+06	1.15862e+07	4.99977e+07	5.0785e+07	5.74506e+06	5.52048e+07	6.53917e+07	6.01679e+07	9.63292e+06	6.84153e+07	6.54289e+07	2.47185e+07	6.56379e+07	2.12441e+07	1.03903e+07	7.7299e+06	6.82395e+07	1.1333e+07	3.54385e+07	4.62327e+07	4.2912e+06	4.88391e+07	3.78897e+07
361	M97T322	97.0648	321.893	5.36	2.11189e+07	5.78946e+06	1.62602e+07	5.93246e+06	3.36088e+07	5.1832e+06	5.28509e+06	5.39726e+06	5.61529e+06	6.09559e+06	2.70014e+07	7.61149e+07	2.29262e+07	2.00162e+07	2.13266e+07	2.29768e+07	1.62077e+07	5.13236e+06	4.9576e+06	6.2107e+06	5.60484e+06	5.97984e+06	2.14351e+07	6.24829e+06	1.88566e+07	2.95064e+07	1.61756e+07	2.90377e+07	5.11543e+06
362	M97T344	97.0647	344.21	5.74	5.53235e+07	3.82889e+06	1.79946e+07	4.34261e+06	2.33557e+07	4.48861e+06	4.66795e+06	4.95844e+06	1.88448e+07	4.94072e+06	2.54422e+07	4.19679e+06	2.03814e+07	1.52912e+07	1.88505e+07	2.03966e+07	5.84547e+07	4.67512e+06	4.79148e+06	4.80616e+06	4.81811e+06	5.77808e+06	2.45337e+07	5.10694e+06	2.66743e+07	1.2932e+07	1.69195e+07	1.62393e+07	4.27039e+06
363	M98T34_1	97.5145	33.9623	0.57	3.15119e+07	3.16855e+07	3.34666e+07	5.01627e+07	3.33456e+07	4.14513e+07	4.08688e+07	3.25963e+07	3.40331e+07	3.6831e+07	3.03452e+07	3.61013e+07	3.01566e+07	3.79798e+07	3.90972e+07	4.16169e+07	3.76942e+07	3.44082e+07	3.70244e+07	3.36643e+07	3.70961e+07	3.10484e+07	3.48281e+07	3.46253e+07	3.74927e+07	3.76995e+07	4.06736e+07	3.85697e+07	3.33503e+07
364	M98T68_1	97.5145	68.3607	1.14	2.29266e+07	7.18319e+06	5.47918e+06	1.54433e+06	1.66481e+07	2.0184e+07	1.003e+07	1.04693e+06	1.41955e+07	4.28504e+06	6.44319e+06	3.39164e+06	6.03279e+06	3.37865e+06	6.55278e+06	2.59354e+07	8.34819e+06	5.80426e+06	5.58096e+06	5.59998e+06	3.50542e+06	4.28239e+06	8.26044e+06	1.33356e+06	7.23393e+06	9.93249e+06	4.16797e+06	6.32289e+06	5.93483e+06
365	M98T60	97.5144	59.5511	0.99	2.83639e+06	8.8738e+06	7.1469e+06	2.29157e+06	2.43321e+06	2.82741e+06	1.04911e+07	1.11587e+07	2.04207e+06	9.30414e+06	1.08983e+07	6.59512e+06	6.52911e+06	2.16599e+06	8.1076e+06	2.02156e+06	8.13126e+06	6.94947e+06	1.23027e+07	6.58769e+06	7.56872e+06	9.35437e+06	9.09906e+06	2.6067e+07	1.16628e+07	1.28068e+07	2.67912e+06	1.14066e+07	8.64084e+06
366	M98T45_1	97.5145	44.5569	0.74	1.7678e+07	2.26599e+07	1.39021e+07	5.91025e+06	2.79731e+07	2.77315e+07	2.14009e+07	4.23502e+06	4.86582e+06	4.62593e+06	2.47378e+07	2.35271e+07	1.92954e+07	4.39477e+06	4.17234e+06	1.65104e+07	1.41801e+07	4.45156e+06	4.39571e+06	4.06472e+06	1.9867e+07	3.69155e+06	1.56509e+07	1.50033e+07	2.52009e+07	2.49491e+07	2.13709e+07	4.80913e+06	4.14596e+06
367	M98T34_2	97.9689	33.9306	0.57	1.48612e+07	9.97702e+06	7.57644e+06	7.25313e+06	8.16565e+06	1.01602e+07	9.26125e+06	4.92443e+07	8.76537e+06	1.33521e+07	1.06972e+07	9.89453e+06	3.5481e+07	1.03272e+07	7.62543e+06	1.25956e+07	8.96192e+06	3.77572e+07	8.27886e+06	1.15859e+07	1.26231e+07	8.97027e+06	1.2036e+07	7.51786e+06	9.81281e+06	9.12111e+06	1.01951e+07	8.55644e+06	7.78253e+06
368	M98T68_2	97.9688	68.0657	1.13	3.54161e+06	1.79471e+07	3.32672e+06	6.05648e+06	1.91104e+07	7.1108e+06	6.53329e+06	3.11577e+06	8.75238e+06	2.69914e+07	6.78749e+06	3.62902e+06	2.64148e+07	1.01756e+07	4.3608e+06	2.76016e+07	2.47884e+07	4.481e+06	4.07573e+06	5.74025e+06	6.54325e+06	2.06864e+06	5.00657e+06	4.91385e+06	5.20912e+06	8.4661e+06	3.46813e+06	6.45667e+06	2.30609e+07
369	M98T56	97.9688	55.7605	0.93	6.71858e+06	2.56153e+07	7.31028e+06	4.84525e+06	2.92742e+07	2.9228e+07	2.84218e+07	5.12711e+06	3.36174e+07	7.14532e+06	6.14782e+06	8.88431e+06	3.41096e+07	3.01367e+07	6.85337e+06	2.61495e+07	1.40309e+07	3.20171e+07	3.25776e+07	2.8771e+07	1.20141e+07	4.44064e+06	5.82651e+06	4.64935e+06	7.92554e+06	4.44668e+06	5.77424e+06	1.20767e+07	2.94649e+07
370	M98T45_2	97.9689	45.4533	0.76	5.85807e+07	5.78768e+07	6.1963e+06	8.73771e+06	5.69749e+07	5.47396e+07	5.91256e+07	4.46302e+06	7.16816e+06	5.542e+06	5.11229e+07	6.59142e+06	5.5998e+07	5.2451e+07	6.93535e+06	5.00088e+07	4.97533e+06	5.58916e+07	7.7193e+06	5.569e+07	5.57794e+07	5.68866e+06	4.44455e+06	7.89041e+06	9.04217e+06	4.43198e+06	7.87862e+06	5.27449e+07	5.23935e+07
371	M98T79	97.9911	78.5125	1.31	4.66642e+07	5.77272e+07	4.99083e+07	5.47239e+07	1.80695e+07	6.87245e+07	1.16045e+08	1.20784e+08	1.11148e+08	1.1179e+08	1.23754e+08	1.2033e+08	1.13609e+08	1.22898e+08	1.33423e+08	1.19477e+08	1.20347e+08	1.28065e+08	1.38956e+08	1.77574e+08	1.85792e+08	1.49931e+08	1.1741e+08	1.51922e+08	1.20466e+08	1.39539e+08	1.18639e+08	1.11968e+08	1.25758e+08
372	M98T36	97.9913	36.3369	0.61	4.25787e+08	2.66931e+08	2.81111e+08	3.52183e+08	2.16152e+08	2.33172e+08	3.00179e+08	2.76941e+08	2.81922e+08	3.41819e+08	2.60926e+08	3.16895e+08	2.96152e+08	3.52454e+08	2.44395e+08	2.77002e+08	2.63916e+08	3.3634e+08	3.19481e+08	2.60828e+08	2.47397e+08	2.37789e+08	2.48361e+08	3.59984e+08	2.79415e+08	2.70581e+08	2.99613e+08	3.21983e+08	3.68248e+08
373	M98T66	97.9915	65.8602	1.1	7.84805e+07	2.81123e+08	9.29163e+07	7.52435e+07	1.68866e+08	1.13396e+08	2.57526e+08	1.00963e+08	1.0838e+08	2.60344e+08	1.32467e+08	2.63003e+08	3.01662e+08	3.05355e+08	1.04488e+08	2.94266e+08	1.71463e+08	3.23508e+07	2.01103e+08	1.15202e+08	1.61658e+08	1.20066e+08	9.60794e+07	2.83308e+08	1.23677e+08	1.00531e+08	1.27575e+08	9.38016e+07	1.12644e+08
374	M98T505	97.9912	505.411	8.42	1.89811e+08	2.89829e+08	1.81992e+08	2.78761e+08	2.88352e+08	2.98834e+08	3.0165e+08	3.13248e+08	3.25666e+08	4.40951e+08	3.3466e+08	3.27052e+08	3.51418e+08	2.13373e+08	3.25386e+08	3.80347e+08	3.81575e+08	7.16804e+07	3.70128e+08	1.76087e+08	3.30848e+08	3.31977e+08	3.1126e+08	1.82259e+08	6.45293e+07	6.56719e+07	3.17075e+08	4.61394e+08	3.38067e+08
375	M98T444	97.9915	444.149	7.4	1.89136e+08	1.82107e+08	1.88577e+08	1.12125e+08	1.28216e+08	2.41256e+08	2.32053e+07	1.70688e+08	1.57935e+08	1.54211e+08	1.82523e+08	4.42699e+07	1.94545e+08	2.20148e+08	2.1194e+08	1.98264e+08	1.92043e+08	2.00734e+08	1.95138e+08	4.94819e+07	1.61615e+08	1.96813e+08	2.91124e+07	4.92773e+07	2.56749e+07	2.19551e+07	1.78955e+08	1.72668e+08	2.13343e+07
376	M98T531	97.9912	531.325	8.86	2.24127e+08	3.01087e+08	2.77318e+08	6.65284e+07	2.9555e+08	2.2544e+08	7.00947e+07	1.79253e+08	1.94423e+08	3.1225e+08	8.89832e+08	2.80611e+08	3.27796e+08	3.33136e+08	9.01824e+08	5.93382e+08	8.72837e+08	1.39098e+09	3.58957e+08	3.11732e+08	3.1072e+08	2.16554e+08	3.10253e+08	5.33673e+08	2.71019e+08	8.07555e+08	7.23088e+08	3.45421e+08	2.14376e+08
377	M98T606	97.9912	605.594	10.09	2.65649e+08	6.02586e+08	1.51258e+08	2.36172e+08	6.21533e+07	3.35943e+08	6.28329e+07	1.83855e+08	3.14981e+08	2.48381e+08	2.7724e+08	3.83517e+08	2.72672e+08	2.70486e+08	1.84461e+08	2.20001e+08	6.65116e+07	1.87698e+08	3.27727e+08	2.43842e+08	6.42219e+07	1.83109e+08	2.8768e+08	2.6009e+08	3.15371e+08	6.90142e+07	1.9066e+08	2.6565e+08	6.88795e+07
378	M98T565	97.9912	565.167	9.42	1.53911e+08	2.73404e+08	4.7641e+08	6.23497e+07	6.30991e+07	4.72956e+08	4.86223e+08	3.09163e+08	6.39384e+07	2.7649e+08	2.58583e+08	2.83205e+08	2.82488e+08	3.1429e+08	2.8984e+08	3.26187e+08	6.4625e+07	6.21458e+07	6.61127e+08	4.02701e+08	2.19131e+08	3.51987e+08	3.00216e+08	1.9606e+08	2.78993e+08	2.24353e+08	6.64989e+07	5.19595e+08	6.65309e+07
379	M98T548	97.9913	547.876	9.13	2.36224e+08	2.66833e+08	2.69984e+08	5.02043e+08	1.55928e+08	4.21892e+08	4.18584e+08	2.03026e+08	2.35431e+08	3.81654e+08	8.456e+07	4.53813e+08	4.30129e+08	4.33564e+08	8.04374e+07	3.2487e+08	8.25406e+07	8.56951e+07	2.2544e+08	1.845e+08	3.50335e+08	2.83129e+08	2.06444e+08	3.53151e+08	1.87309e+08	7.68565e+07	7.80433e+07	2.18156e+08	7.82279e+07
380	M98T520	97.9913	520.233	8.67	1.82819e+08	1.98064e+08	2.21417e+08	1.89783e+08	1.68865e+08	2.17994e+08	2.68028e+08	1.96873e+08	2.16992e+08	4.73639e+07	4.95631e+07	4.36476e+07	2.40834e+08	2.43839e+08	4.91596e+07	4.90615e+07	4.89194e+07	4.81586e+07	2.22809e+08	2.47229e+08	2.46863e+08	2.41545e+08	5.23268e+07	4.69514e+07	5.00272e+07	4.85251e+07	4.71524e+07	5.05068e+07	5.13067e+07
381	M98T626	97.9912	625.574	10.43	2.16105e+08	6.0686e+07	2.06468e+08	4.67416e+08	3.55426e+08	5.60796e+07	5.5041e+07	5.4725e+07	4.55651e+08	5.24155e+07	1.81632e+08	2.03298e+08	5.53779e+07	3.03847e+08	4.0916e+08	2.33921e+08	5.7212e+07	2.29769e+08	5.40711e+08	5.24063e+07	5.61044e+07	2.1155e+08	4.89048e+07	2.24316e+08	1.83233e+08	1.07816e+09	2.02489e+08	4.91213e+07	1.77797e+08
382	M98T466	97.9913	465.907	7.77	5.87905e+08	5.65164e+08	4.02653e+08	4.17176e+08	5.69803e+08	5.74302e+08	1.16677e+08	1.05329e+08	6.44193e+08	9.98365e+07	1.4311e+08	5.77122e+08	6.48302e+08	4.65015e+08	2.56258e+08	4.77228e+08	6.77983e+08	2.08804e+08	1.19626e+08	2.53567e+08	4.38567e+08	2.35455e+08	2.19728e+08	4.2247e+08	1.16828e+08	1.15806e+08	4.18315e+08	1.03731e+08	2.02848e+08
383	M98T577	97.9911	576.925	9.62	4.30613e+08	1.62101e+08	6.15197e+07	6.52012e+07	9.85604e+08	5.88733e+07	6.10852e+07	2.97797e+08	5.1056e+08	1.7759e+08	2.1136e+08	2.27443e+08	1.68177e+08	2.18615e+08	2.59931e+08	1.7646e+08	1.00151e+09	5.92542e+07	7.02277e+07	2.20186e+08	2.0146e+08	2.28326e+08	2.84434e+08	3.69623e+08	2.31941e+08	3.55434e+08	2.22608e+08	6.3113e+07	1.12429e+09
384	M98T659	97.9912	659.326	10.99	1.65491e+08	6.24282e+08	7.75544e+07	1.90316e+08	7.66563e+07	6.50592e+08	6.99021e+08	1.24618e+09	7.48846e+07	2.70618e+08	7.67905e+07	2.36278e+08	3.06582e+08	4.96098e+08	1.5025e+08	7.625e+07	1.61506e+09	7.28371e+07	7.92353e+07	6.56417e+08	1.31755e+09	3.35815e+08	6.84494e+07	7.46102e+07	1.62792e+08	4.10825e+07	6.94967e+07	6.96569e+07	7.84465e+07
385	M98T688	97.9913	688.352	11.47	3.60805e+08	3.50731e+08	3.10255e+08	2.52241e+08	3.03433e+08	1.55413e+08	4.15909e+07	4.07656e+07	1.65619e+08	4.11972e+07	1.56904e+08	1.54056e+08	3.66204e+07	5.49404e+07	9.34309e+07	1.52243e+08	3.14631e+07	4.16697e+07	1.34041e+08	3.53106e+07	1.69885e+07	1.8632e+07	1.35744e+08	1.69262e+08	1.33e+08	5.61252e+08	3.53987e+07	1.22195e+08	4.04874e+07
386	M98T78	98.0137	77.5097	1.29	7.66577e+07	8.01603e+07	7.65013e+07	6.93123e+07	7.55419e+07	7.57842e+07	9.34835e+07	1.17383e+08	9.25271e+07	8.83465e+07	1.33174e+08	1.3251e+08	1.48363e+08	1.63335e+08	1.18004e+08	1.26015e+08	1.04994e+08	1.36642e+08	1.0585e+08	1.27245e+08	7.49601e+07	1.07197e+08	6.95685e+07	9.00749e+07	9.49181e+07	9.23709e+07	1.09472e+08	1.11779e+08	5.03884e+07
387	M98T33	98.0136	32.8997	0.55	6.02655e+07	3.85108e+07	4.80593e+07	4.98177e+07	4.31601e+07	4.64678e+07	5.11605e+07	3.96422e+07	5.02399e+07	3.74334e+07	4.49754e+07	4.61283e+07	3.63458e+07	3.21648e+07	3.05139e+07	3.02338e+07	3.60549e+07	4.44934e+07	4.60187e+07	4.83637e+07	2.72173e+07	4.58752e+07	4.69129e+07	4.53805e+07	6.16695e+07	4.54861e+07	4.81833e+07	4.19796e+07	3.77786e+07
388	M98T365	98.0237	364.995	6.08	4.19696e+06	6.054e+06	4.21139e+06	4.11846e+06	5.38911e+06	5.87476e+06	7.00339e+06	4.295e+06	4.07014e+06	4.91672e+06	6.52283e+06	7.95992e+06	3.81333e+07	7.1564e+06	3.03339e+06	3.94739e+06	4.7585e+07	2.66914e+06	3.90641e+06	4.33721e+07	2.97296e+06	4.43113e+06	4.91731e+07	3.47613e+06	4.51055e+07	6.38177e+06	5.69364e+06	4.42422e+06	5.04951e+06
389	M98T94	98.0318	94.2688	1.57	2.34425e+07	2.34116e+07	1.73743e+07	2.50566e+07	8.31547e+06	2.83405e+07	2.14346e+08	1.28831e+08	9.05822e+07	9.58439e+07	1.16592e+08	1.07119e+08	1.8085e+08	1.82505e+08	1.68697e+08	2.285e+08	1.92247e+08	1.57695e+08	1.59232e+08	1.52375e+08	4.09903e+08	1.69709e+08	1.63795e+08	1.59891e+08	1.48859e+08	1.58361e+08	1.42901e+08	1.33233e+08	1.38632e+08
390	M98T102	98.0318	101.806	1.7	7.90662e+07	6.94912e+07	7.54415e+07	7.33294e+07	1.14928e+08	7.78502e+07	2.60753e+07	1.15201e+08	1.19096e+08	1.04159e+08	1.1501e+08	9.96311e+07	1.5558e+08	1.71824e+08	1.56288e+08	4.649e+07	4.5463e+07	1.78961e+08	1.50583e+08	2.22448e+08	5.16329e+07	1.80977e+08	2.05438e+08	2.07456e+08	1.03162e+08	1.3749e+08	1.42716e+08	1.249e+08	1.64453e+08
391	M98T76	98.0345	76.3132	1.27	2.65726e+07	1.89704e+07	1.91378e+07	2.44387e+07	8.13589e+06	1.89899e+07	3.00302e+07	4.1843e+07	3.71986e+07	3.92622e+07	4.32882e+07	3.50991e+07	3.55287e+07	4.13336e+07	5.39452e+07	4.81253e+07	4.95628e+07	4.57187e+07	4.02504e+07	5.94611e+07	8.40769e+07	7.58225e+07	8.6428e+07	7.54017e+07	4.07951e+07	3.61851e+07	4.65675e+07	3.08368e+07	4.98058e+07
392	M98T104_1	98.0602	103.58	1.73	8.38335e+07	2.95815e+07	2.95609e+07	4.6179e+07	9.38685e+07	8.47895e+07	9.46489e+07	3.99299e+07	3.30861e+07	1.03281e+08	5.65228e+07	1.68918e+08	1.65992e+08	7.3191e+07	9.37236e+07	9.67486e+07	1.74112e+08	2.01742e+08	2.93126e+08	3.91068e+07	8.4503e+07	5.72985e+07	2.78649e+08	8.97737e+07	8.71805e+07	3.66626e+07	8.68882e+07	1.05895e+08	1.61123e+08
393	M98T104_2	98.0967	103.544	1.73	3.38784e+08	3.47243e+08	3.39531e+08	3.60274e+08	3.62703e+08	3.42925e+08	3.70152e+08	3.96318e+08	3.45031e+08	3.87158e+08	4.06797e+08	3.88788e+08	3.50972e+08	3.6135e+08	3.58844e+08	3.65155e+08	3.58779e+08	3.44509e+08	3.3081e+08	3.40256e+08	3.42827e+08	3.65082e+08	3.14855e+08	3.44797e+08	3.12651e+08	3.24605e+08	3.15138e+08	3.59778e+08	3.44153e+08
394	M98T147	98.0968	146.953	2.45	2.9664e+08	2.86843e+08	3.24035e+08	3.10433e+08	3.2756e+08	3.39959e+08	2.94782e+08	3.21614e+08	3.0225e+08	3.37293e+08	3.58583e+08	3.53414e+08	3.38402e+08	3.46942e+08	3.21499e+08	3.37348e+08	3.48981e+08	3.2995e+08	3.32327e+08	3.6543e+08	3.23062e+08	3.36932e+08	3.03657e+08	3.44683e+08	3.1038e+08	2.83307e+08	3.24094e+08	3.57322e+08	3.48655e+08
395	M98T320	98.0968	319.677	5.33	3.35683e+07	1.03872e+07	9.97605e+06	1.11584e+07	1.2491e+07	1.28367e+07	1.31954e+07	1.207e+07	1.32396e+07	1.34712e+07	1.56792e+07	1.35625e+07	8.09673e+07	7.81293e+07	1.75103e+07	8.13125e+07	7.97459e+07	7.07168e+07	7.95317e+07	9.12536e+07	8.38886e+07	9.00248e+07	8.45858e+07	8.77215e+07	3.96865e+07	4.55426e+07	6.02874e+07	1.71224e+07	7.87004e+07
396	M99T34_1	98.512	33.9623	0.57	7.35081e+08	5.65182e+08	6.07082e+08	6.81709e+08	5.35104e+08	6.3244e+08	6.50221e+08	5.57095e+08	5.57578e+08	6.12127e+08	5.09637e+08	5.66653e+08	5.25641e+08	5.61322e+08	5.88956e+08	6.37071e+08	5.71434e+08	5.99581e+08	5.99471e+08	5.10605e+08	6.29849e+08	5.83921e+08	6.2568e+08	5.60482e+08	6.49067e+08	6.11229e+08	6.54836e+08	6.60037e+08	5.68081e+08
397	M99T68	98.512	68.0506	1.13	1.70532e+08	1.78675e+08	1.26661e+08	1.42371e+08	5.89134e+08	5.13009e+08	4.8854e+07	4.32952e+08	2.97975e+08	2.89717e+08	1.30225e+08	4.01814e+08	1.31022e+08	5.91892e+08	1.67754e+08	6.00275e+08	6.21563e+08	1.3571e+08	4.0456e+08	4.46815e+08	4.34792e+08	1.14978e+08	1.13162e+08	1.80203e+08	1.48964e+08	6.12498e+08	1.40086e+08	1.30906e+08	5.051e+08
398	M99T771	98.5118	770.749	12.85	2.09806e+08	1.86057e+08	5.11135e+08	2.65618e+08	1.24182e+09	1.83006e+08	1.76229e+08	1.1757e+09	2.9821e+08	1.13863e+09	2.16008e+08	1.12607e+09	2.11731e+08	1.01292e+09	2.06413e+08	2.88621e+08	2.41542e+08	1.29708e+09	1.18359e+09	3.03165e+08	1.00767e+09	2.26126e+08	2.74804e+08	1.15148e+09	1.47139e+09	1.06618e+09	4.02091e+08	1.20585e+09	1.20353e+09
399	M99T828	98.5118	828.075	13.8	1.64614e+08	3.79728e+08	1.20788e+08	1.36513e+08	1.76435e+08	1.49469e+08	1.05536e+08	1.40662e+08	1.42636e+08	1.24023e+08	3.38181e+08	1.69792e+08	1.25557e+08	3.26635e+07	3.75319e+07	3.40305e+08	1.69338e+08	2.36988e+08	1.42303e+08	1.1795e+08	9.91847e+07	1.27234e+08	1.27699e+08	8.04922e+07	3.97052e+07	1.24673e+08	1.65084e+08	2.14707e+08	1.45479e+08
400	M99T838	98.5118	837.766	13.96	5.37194e+07	1.49874e+07	6.0456e+07	6.68449e+07	1.49389e+07	4.73801e+07	1.5768e+07	4.77838e+07	1.26888e+07	1.2494e+07	1.68125e+07	1.41444e+07	1.13912e+08	1.22092e+07	1.70938e+08	1.64846e+07	1.29844e+07	7.85608e+07	7.16453e+07	6.34612e+07	6.71833e+07	7.33278e+07	5.5375e+07	7.43589e+07	6.13619e+07	7.64144e+07	1.37984e+07	1.41554e+07	1.38752e+07
401	M99T443	98.512	443.309	7.39	3.9252e+07	5.22747e+07	1.15464e+08	4.35208e+07	4.3007e+07	2.17816e+07	9.7163e+06	1.90728e+07	8.58645e+07	4.92956e+07	9.18821e+07	7.38084e+07	7.97601e+07	2.05319e+07	9.86735e+07	2.13871e+07	9.66745e+07	8.19976e+07	1.89881e+07	1.81857e+07	1.9946e+07	1.85179e+07	1.17366e+07	1.89107e+07	9.25593e+06	6.52723e+06	5.35301e+07	9.64911e+07	5.75646e+06
402	M99T814	98.5119	813.723	13.56	1.26497e+08	3.40892e+07	1.29899e+08	1.59972e+08	2.92841e+07	9.16479e+07	9.9819e+07	1.27608e+08	1.31294e+08	1.5085e+08	3.088e+07	2.54058e+07	1.07414e+08	2.64517e+08	1.63835e+08	2.75798e+07	1.05769e+08	2.88168e+07	3.2898e+07	1.65215e+08	2.74802e+07	1.12182e+08	8.68745e+07	1.40224e+08	3.46586e+07	9.27781e+07	1.4155e+08	2.4905e+07	2.93135e+07
403	M99T93	98.9842	93.2751	1.55	7.41717e+08	7.62475e+08	7.70521e+08	7.43607e+08	7.17302e+08	7.10538e+08	5.36273e+08	5.16002e+08	5.48333e+08	5.43743e+08	6.16774e+08	6.51683e+08	5.7375e+08	4.82293e+08	5.41844e+08	5.82956e+08	5.64098e+08	5.09563e+08	4.70614e+08	3.77574e+08	3.41746e+08	3.64986e+08	4.71038e+08	3.80216e+08	5.51527e+08	5.66788e+08	5.75925e+08	6.01471e+08	5.99785e+08
404	M99T126	98.9841	126.218	2.1	1.34265e+08	2.2847e+08	1.41649e+08	9.98737e+07	4.77621e+08	1.31206e+08	1.48345e+08	1.1179e+08	1.19027e+08	3.80988e+08	2.61868e+08	2.83693e+08	1.54109e+08	2.01561e+08	1.31462e+08	4.44331e+08	4.38155e+08	4.37803e+08	1.23153e+08	3.13771e+08	1.92296e+08	5.61326e+08	1.66336e+08	1.2557e+08	1.70623e+08	2.18821e+08	2.96521e+08	4.43879e+08	4.49919e+08
405	M99T164	98.984	163.809	2.73	1.44189e+08	6.61383e+07	9.01197e+07	6.85165e+07	7.27019e+07	9.25517e+07	9.99384e+07	1.34869e+08	1.00036e+08	5.49842e+07	1.3312e+08	7.43699e+07	7.06062e+07	2.05022e+08	6.01152e+07	4.96367e+07	1.15706e+08	2.16115e+08	2.44663e+08	2.54518e+08	2.78586e+08	2.64407e+08	2.4584e+08	5.14144e+07	4.74126e+07	1.04721e+08	1.55603e+08	1.64916e+08	1.28699e+08
406	M99T107	98.9841	106.754	1.78	2.31389e+08	2.06358e+08	2.21421e+08	2.05516e+08	1.59564e+08	2.45354e+08	2.46103e+08	2.18009e+08	1.6013e+08	4.045e+08	2.17752e+08	2.66566e+08	2.02539e+08	2.22853e+08	2.47206e+08	6.19229e+08	5.90533e+08	6.14193e+08	1.73395e+08	1.55621e+08	1.49148e+08	2.34937e+08	1.89383e+08	6.34801e+08	2.03715e+08	2.38311e+08	1.38355e+08	4.82473e+08	5.26075e+08
407	M99T38	98.9947	37.848	0.63	3.53283e+07	3.12102e+07	3.1588e+07	5.41229e+06	3.14859e+07	3.3514e+07	6.37908e+06	5.46676e+06	3.4298e+07	3.5517e+07	5.19805e+06	3.73152e+07	5.98629e+06	6.46786e+06	6.45773e+06	4.99671e+06	4.75576e+06	7.14826e+06	5.08564e+07	3.55978e+06	5.64821e+07	5.45154e+07	5.47177e+06	5.06415e+07	7.2091e+06	7.18053e+06	5.23239e+06	4.50967e+06	5.05027e+07
408	M99T219	99.0077	219.026	3.65	6.35507e+07	6.68765e+07	6.50821e+07	2.74628e+07	1.63629e+07	3.68183e+07	5.53255e+07	2.57774e+07	4.97313e+07	3.38709e+07	4.24899e+07	2.99972e+07	3.13828e+07	3.62283e+07	3.13985e+07	2.94082e+07	3.61559e+07	5.63958e+07	3.35139e+07	6.70615e+07	6.09704e+07	3.7136e+07	5.87647e+07	6.58018e+07	4.25322e+07	6.38423e+07	3.92625e+07	3.01485e+07	3.8004e+07
409	M99T34_2	99.0135	33.9623	0.57	4.0583e+07	4.40944e+07	4.41029e+07	4.77843e+07	4.16058e+07	4.16068e+07	4.7603e+07	4.2785e+07	3.90019e+07	4.3403e+07	3.40449e+07	4.2147e+07	4.10079e+07	4.4113e+07	4.90181e+07	4.88067e+07	4.26349e+07	4.16205e+07	4.47074e+07	4.94269e+07	4.3603e+07	4.34367e+07	4.56453e+07	3.83029e+07	4.67427e+07	4.22473e+07	4.74675e+07	4.88852e+07	3.91506e+07
410	M99T66	99.0135	65.6724	1.09	1.4275e+07	9.59648e+06	3.17515e+07	3.0887e+07	4.1599e+07	9.60496e+06	1.07678e+07	2.88645e+07	1.06743e+07	8.23948e+06	2.62942e+07	9.21271e+06	1.3466e+07	6.9538e+06	8.82758e+06	4.69144e+07	1.77214e+07	2.19507e+07	6.88045e+06	2.7564e+07	3.23871e+07	2.65288e+07	1.32095e+07	1.27673e+07	8.62838e+06	4.16632e+07	1.84785e+07	7.74404e+06	2.4913e+07
411	M99T45	99.0135	45.02	0.75	4.85896e+07	3.30656e+07	2.11133e+07	4.3779e+07	4.4541e+07	2.21223e+07	4.17532e+07	2.6474e+07	3.12928e+07	1.48122e+07	4.57466e+07	2.69927e+07	2.13427e+07	2.22588e+07	6.32441e+07	6.0396e+07	2.51857e+07	2.13631e+07	9.8532e+06	7.00795e+07	7.72951e+07	7.02459e+06	2.57575e+07	3.04185e+07	2.4895e+07	4.06453e+07	2.06841e+07	1.96695e+07	6.61293e+07
412	M99T94	99.0441	94.2604	1.57	4.02617e+08	3.74525e+08	3.96598e+08	4.00581e+08	1.8994e+08	4.20502e+08	1.10868e+09	1.32685e+09	9.85705e+08	1.19764e+09	1.24909e+09	1.08725e+09	1.65975e+09	1.99169e+09	1.44826e+09	2.23218e+09	1.64139e+09	1.38596e+09	1.53292e+09	1.65849e+09	1.91399e+09	1.41977e+09	1.49128e+09	1.4555e+09	1.40825e+09	1.39963e+09	1.38005e+09	1.29403e+09	3.16478e+08
413	M99T102	99.0441	102.329	1.71	5.10559e+08	5.1479e+08	5.53362e+08	5.14551e+08	1.58385e+09	5.75212e+08	1.17527e+09	1.26904e+09	1.18617e+09	1.00328e+09	1.47566e+09	1.17884e+09	1.63302e+09	4.47367e+08	1.42499e+09	4.59796e+08	2.00419e+09	1.79749e+09	1.51607e+09	2.5421e+09	4.95513e+08	2.09762e+09	2.22828e+09	2.33661e+09	1.09591e+09	1.43778e+09	1.68624e+09	1.63014e+09	1.64336e+09
414	M99T144	99.044	143.863	2.4	1.12893e+08	1.03687e+08	1.32369e+09	4.03878e+08	1.04289e+08	3.80167e+08	6.7151e+08	1.84921e+08	3.90411e+08	1.15398e+09	9.84809e+08	5.08139e+08	3.0968e+08	1.36066e+09	2.8965e+08	5.99912e+08	7.85711e+08	1.36242e+09	1.15898e+09	2.13684e+09	1.12061e+09	1.98435e+09	3.91796e+09	2.45352e+09	1.65663e+08	7.61531e+08	2.14379e+08	5.43396e+08	1.61364e+09
415	M99T123	99.044	123.29	2.05	9.62729e+07	8.836e+07	8.25205e+07	3.42666e+08	9.60183e+07	9.10154e+07	1.8063e+08	9.20457e+08	5.24024e+08	8.03153e+08	5.80862e+08	2.00919e+08	1.27499e+09	2.19322e+09	1.36756e+09	9.34498e+08	1.2525e+09	2.73496e+09	2.69489e+09	2.1056e+09	1.15028e+09	1.04074e+09	3.52093e+08	1.30111e+09	1.62979e+08	5.80909e+06	7.30726e+08	7.72409e+08	2.09455e+09
416	M99T147	99.0999	146.866	2.45	1.74954e+07	1.52978e+07	2.02201e+07	1.66646e+07	1.93147e+07	2.25096e+07	1.501e+07	1.81118e+07	2.03727e+07	1.74129e+07	1.9993e+07	2.04203e+07	1.56456e+07	1.81455e+07	1.979e+07	1.82643e+07	2.0876e+07	2.08455e+07	2.08682e+07	2.13508e+07	1.87784e+07	2.14001e+07	2.09253e+07	1.65207e+07	1.74749e+07	1.72995e+07	1.72609e+07	1.86398e+07	1.88542e+07
417	M99T104	99.0998	103.656	1.73	1.747e+07	2.0556e+07	2.24916e+07	1.81896e+07	1.96163e+07	2.529e+07	1.81851e+07	2.76208e+07	1.42443e+07	2.55683e+07	2.17569e+07	2.26812e+07	2.20177e+07	1.55276e+07	2.62593e+07	2.29475e+07	2.09686e+07	1.87236e+07	5.24301e+06	2.23497e+07	2.69623e+07	1.95831e+07	1.36197e+07	1.57116e+07	1.71644e+07	1.45192e+07	1.41723e+07	2.47137e+07	2.36055e+07
418	M100T33	99.5128	32.9062	0.55	7.83768e+07	7.29357e+07	8.09505e+07	7.40485e+07	1.13406e+08	8.17097e+07	9.01655e+07	1.04535e+08	9.64525e+07	7.07031e+07	7.03871e+07	1.27614e+08	8.63819e+07	8.1579e+07	6.18814e+07	8.33846e+07	8.57976e+07	8.17334e+07	8.52954e+07	8.38084e+07	9.05201e+07	7.17263e+07	8.80313e+07	7.78849e+07	9.27439e+07	1.40837e+08	8.90967e+07	7.76553e+07	6.4842e+07
419	M100T68_1	99.5121	68.0657	1.13	2.06551e+07	2.12144e+07	1.94352e+07	1.92962e+07	1.93751e+07	1.88834e+07	2.28956e+07	1.38397e+07	1.94663e+07	2.68809e+07	2.22221e+07	2.12196e+07	2.0425e+07	1.44798e+07	4.79315e+07	1.7955e+07	4.95209e+07	1.02065e+07	2.05751e+07	2.7669e+07	4.89771e+07	2.72821e+07	5.84251e+07	8.88321e+06	1.66494e+07	1.76414e+07	2.02639e+07	1.30004e+07	4.85744e+07
420	M100T827	99.5122	827.135	13.79	3.84436e+08	4.17757e+08	3.42732e+08	1.09553e+08	3.08983e+08	3.58822e+08	1.18131e+08	5.63023e+07	5.36206e+07	5.64433e+07	1.00044e+08	1.28136e+08	5.90859e+07	1.50647e+08	2.10183e+08	3.58971e+08	6.6193e+07	1.28971e+08	1.14961e+08	1.38404e+08	5.34491e+08	5.59675e+07	5.90707e+07	1.78969e+08	9.04371e+07	3.14189e+08	2.16132e+08	5.53981e+07	5.78492e+07
421	M100T798	99.5126	797.958	13.3	3.88329e+08	1.77291e+08	2.16788e+08	3.66356e+08	1.26978e+08	3.29198e+08	2.52527e+08	4.4553e+08	5.68682e+07	5.78497e+07	1.99166e+08	2.49463e+08	6.04381e+07	1.80655e+08	1.81606e+08	2.07838e+08	5.80308e+07	2.00102e+08	3.55832e+08	3.10383e+08	5.82095e+07	1.68164e+08	5.69765e+07	1.06274e+09	1.65887e+08	2.79762e+08	5.59414e+07	1.69716e+08	2.02954e+08
422	M100T736	99.5125	736.027	12.27	2.23554e+08	9.43201e+07	1.83523e+08	2.48978e+07	1.38536e+08	1.11499e+08	1.21397e+08	1.14757e+08	2.95076e+07	1.24362e+08	9.4198e+07	7.56466e+07	2.88599e+07	2.32849e+08	2.45085e+07	7.69141e+07	6.92661e+07	1.90879e+08	2.06646e+08	9.12598e+07	6.64329e+07	2.05685e+07	2.28601e+07	7.09015e+07	6.22777e+07	8.66179e+07	3.07748e+07	9.96262e+07	1.64542e+08
423	M100T757	99.5126	757.319	12.62	1.67323e+08	1.48263e+08	1.64451e+08	2.53244e+07	1.06178e+08	1.76285e+08	1.33725e+08	1.19792e+08	3.41378e+07	2.45995e+07	8.50749e+07	1.36421e+08	2.99255e+07	2.92153e+07	1.25976e+08	1.3774e+08	1.18648e+08	1.40294e+08	9.34518e+07	1.55373e+08	8.58761e+07	2.12355e+07	2.72736e+07	2.24733e+07	1.76383e+08	1.0984e+08	3.11452e+07	2.42573e+07	2.54578e+07
424	M100T786	99.5126	785.766	13.1	5.06017e+07	1.57983e+08	1.49102e+08	5.90077e+07	1.83699e+08	5.97611e+07	1.32493e+08	5.15608e+07	6.25947e+07	1.15404e+09	1.53907e+08	5.10142e+07	5.44877e+07	1.43108e+08	3.21958e+08	2.52185e+08	4.68495e+08	2.48633e+08	5.01679e+07	5.2907e+07	1.04358e+08	1.41729e+08	1.21789e+09	5.00366e+07	1.76335e+08	1.64677e+08	1.105e+09	2.13839e+08	5.31474e+08
425	M100T775	99.5126	774.549	12.91	1.68521e+08	2.92431e+08	1.4619e+08	4.92872e+07	1.82302e+08	2.36756e+08	1.62589e+08	2.02331e+08	1.37568e+09	5.12394e+07	1.77284e+08	1.96201e+08	1.35235e+09	1.19091e+08	5.52897e+07	1.98005e+08	4.86839e+07	5.41846e+07	2.00868e+08	2.37294e+08	2.25977e+08	3.83053e+08	5.17754e+07	5.0925e+07	1.89673e+08	5.16078e+07	5.45051e+07	5.43558e+07	4.97976e+07
426	M100T724	99.5124	723.609	12.06	2.18096e+07	1.0935e+08	2.16528e+07	1.71234e+08	2.42785e+07	2.11242e+07	2.30528e+07	9.98304e+07	2.3203e+07	7.47434e+07	6.2994e+07	1.95618e+07	2.54235e+07	5.06519e+07	2.01427e+08	2.02717e+07	5.63433e+07	2.27459e+07	2.14069e+07	9.77197e+07	5.32358e+07	2.65998e+08	1.46605e+08	1.719e+07	1.99893e+07	8.3399e+07	2.32074e+07	5.9295e+07	7.73641e+07
427	M100T79	99.531	78.6031	1.31	6.3326e+06	8.29035e+06	6.8275e+06	7.22794e+06	5.92673e+06	3.76908e+07	5.12117e+07	1.20384e+07	6.04901e+07	1.10979e+07	7.2893e+07	5.77154e+07	5.82078e+07	7.56828e+07	1.0048e+08	1.21926e+07	5.12635e+07	1.37755e+07	5.71177e+07	8.95347e+07	1.41638e+08	7.96161e+07	6.86092e+07	6.35688e+07	6.05651e+07	5.56209e+07	5.37934e+07	1.13853e+07	1.26323e+07
428	M100T44	99.5312	43.7283	0.73	3.26317e+08	5.89643e+07	6.43989e+07	6.13404e+07	6.00244e+07	6.80252e+07	2.20277e+08	5.97064e+07	5.62484e+07	5.87159e+07	2.14936e+08	2.08582e+08	1.75642e+08	2.34732e+08	1.33324e+08	5.7815e+07	1.52804e+08	3.25369e+08	5.96339e+07	2.09955e+08	1.13968e+08	7.73892e+07	2.19681e+08	1.69936e+08	1.09676e+08	2.35673e+08	2.8546e+08	1.53988e+08	1.24496e+08
429	M100T65	99.5311	64.8054	1.08	2.61989e+07	2.68926e+07	2.418e+07	2.46362e+07	2.39924e+07	6.48091e+07	7.98303e+07	1.65371e+08	1.17751e+08	2.4401e+07	5.71809e+07	7.66526e+07	5.25108e+07	2.6262e+07	7.96895e+07	7.05641e+07	1.26264e+08	2.36814e+07	2.54425e+07	4.54019e+07	2.66494e+07	7.43953e+07	2.20027e+07	1.06841e+08	1.54917e+08	2.78827e+07	2.54498e+07	1.44992e+08	8.31847e+07
430	M100T76	100.024	76.3404	1.27	4.60868e+09	5.07031e+09	4.90003e+09	4.74659e+09	5.11823e+09	5.06619e+09	5.51592e+09	5.48289e+09	5.46652e+09	5.31931e+09	5.33131e+09	5.36755e+09	4.7141e+09	4.84228e+09	4.89153e+09	5.00099e+09	4.7151e+09	4.8633e+09	5.5161e+09	5.66102e+09	5.55312e+09	5.80941e+09	5.53052e+09	6.24236e+09	5.41682e+09	5.47832e+09	5.64452e+09	5.56609e+09	5.43982e+09
431	M100T49	100.024	48.9036	0.82	1.70788e+07	4.2533e+07	2.93045e+07	8.15051e+07	7.08765e+07	8.27499e+07	8.41925e+07	8.20944e+07	2.11362e+07	2.48288e+07	2.32574e+07	2.31764e+07	7.83716e+07	1.162e+07	7.70067e+07	7.80313e+07	7.9476e+07	1.72287e+07	2.63745e+07	2.22837e+07	1.13752e+07	3.03363e+07	3.21993e+07	2.81455e+07	2.52461e+07	8.2778e+07	3.43937e+07	8.12255e+07	8.35901e+07
432	M100T103	100.047	103.493	1.72	3.76903e+07	1.59912e+07	5.80823e+07	4.58912e+07	5.88108e+07	5.09927e+07	7.99533e+07	5.73624e+07	5.06636e+07	2.05633e+08	6.50321e+07	8.56945e+07	1.02358e+08	3.22589e+08	6.72025e+07	2.94504e+08	1.02436e+08	8.43743e+07	8.43578e+07	8.08657e+07	1.17126e+08	1.02442e+08	1.02938e+08	1.37509e+08	5.53985e+07	7.83873e+07	6.954e+07	6.50426e+07	5.30836e+07
433	M100T94_1	100.047	94.2371	1.57	1.6237e+07	1.60512e+07	3.07368e+06	1.17317e+07	5.26427e+06	1.99585e+07	3.87751e+07	6.83126e+07	5.05811e+07	1.07341e+07	6.14906e+07	1.54209e+07	6.57022e+07	1.7063e+07	5.74385e+07	1.9207e+07	1.85578e+07	5.86128e+07	8.7305e+07	6.49653e+07	6.59667e+07	7.55007e+07	6.21926e+07	8.03804e+07	9.06088e+07	6.48056e+07	7.22331e+07	4.57295e+07	7.61801e+07
434	M100T68_2	100.04	68.1179	1.14	1.01734e+07	8.26989e+06	2.12512e+07	1.36111e+08	1.16141e+07	2.1843e+07	7.55773e+06	2.04448e+07	1.48813e+07	2.6944e+08	6.75758e+06	2.67669e+07	8.15861e+07	1.21804e+07	7.18565e+06	8.87846e+07	1.88622e+08	9.28608e+07	1.19917e+07	7.97329e+06	9.91794e+07	2.6743e+07	1.9574e+07	2.40774e+07	5.34995e+06	9.13859e+06	1.22507e+08	1.89183e+08	1.18622e+07
435	M100T46	100.04	45.9498	0.77	3.12433e+07	7.35887e+06	1.45504e+07	7.12672e+06	9.2407e+06	1.79199e+07	6.66839e+06	1.25542e+07	1.07282e+07	7.51582e+06	6.87956e+06	9.41384e+06	7.10726e+06	1.36115e+07	7.28634e+06	6.67717e+06	6.83086e+06	7.07359e+06	1.6468e+07	1.00147e+07	6.58909e+06	7.3572e+06	1.6978e+07	9.43765e+06	1.32505e+07	7.24274e+06	6.77171e+06	6.73e+06	1.34465e+07
436	M100T94_2	100.076	94.0882	1.57	4.42534e+07	1.50224e+07	1.62209e+07	5.35044e+07	1.24276e+07	4.34756e+07	1.01871e+08	7.00206e+07	8.39436e+07	8.53633e+07	1.19365e+08	9.58987e+07	1.0045e+08	1.12621e+08	7.53696e+07	1.04434e+08	8.74134e+07	8.78815e+07	1.03277e+08	1.33102e+08	1.13755e+08	8.68583e+07	8.37247e+07	1.02411e+08	2.4022e+07	8.37809e+07	9.19299e+07	9.10129e+07	8.26003e+07
437	M100T32	100.112	31.9124	0.53	8.06639e+07	8.18304e+07	8.46763e+07	2.07832e+07	7.40569e+07	5.8219e+07	6.24242e+07	2.20536e+07	1.89662e+07	1.69935e+07	8.88961e+07	2.03681e+07	5.19079e+07	6.31523e+07	4.92297e+07	7.99234e+07	6.36932e+07	8.77516e+07	6.09658e+07	7.01653e+07	8.27786e+07	5.63659e+07	8.33486e+07	9.50657e+07	8.93574e+07	6.91839e+07	8.07023e+07	6.75566e+07	7.1558e+07
438	M101T830	100.51	830.394	13.84	1.63387e+07	1.4028e+08	3.47159e+07	1.34392e+08	4.7799e+07	4.98788e+07	4.09783e+07	1.02231e+08	1.15871e+08	3.55656e+07	8.60545e+07	1.48673e+07	1.107e+08	1.4834e+07	5.56905e+07	3.91501e+07	6.24865e+07	4.50511e+07	1.58412e+07	1.33905e+07	5.33518e+07	6.67568e+07	4.91659e+07	5.44873e+07	4.21142e+07	4.09814e+07	3.959e+07	9.88721e+07	3.57237e+07
439	M101T66	100.51	65.9831	1.1	2.04741e+06	2.03838e+07	1.98918e+06	1.83124e+06	1.96003e+06	5.86499e+06	4.69298e+06	4.55699e+06	1.94029e+07	5.20133e+06	1.46148e+06	1.57308e+06	4.73715e+06	1.59387e+06	6.04451e+06	1.84153e+07	9.96298e+06	1.51247e+06	2.04192e+07	1.708e+07	1.97688e+07	4.46508e+06	3.32485e+06	1.92887e+06	1.96837e+07	7.87886e+06	1.83157e+06	4.1154e+06	1.95994e+06
440	M101T33	100.51	32.9214	0.55	2.78398e+07	2.85976e+07	2.92776e+07	6.87856e+06	2.64858e+07	5.09172e+07	3.49589e+07	4.26442e+07	3.46414e+07	2.81845e+07	2.81133e+07	3.24532e+07	3.44815e+07	2.89389e+07	2.75556e+07	3.42123e+07	2.75865e+07	4.94547e+07	3.13676e+07	2.87659e+07	3.35379e+07	4.49559e+07	4.79735e+07	3.44753e+07	3.47146e+07	5.41812e+07	3.21421e+07	3.17528e+07	7.0808e+06
441	M101T798	100.51	798.113	13.3	2.06194e+07	6.71229e+07	1.782e+08	7.73373e+07	1.45307e+08	9.5248e+07	6.94675e+07	3.5733e+07	6.05913e+07	1.75256e+08	7.52228e+07	1.37734e+08	5.75243e+07	6.131e+07	1.65573e+07	1.99967e+07	1.89572e+07	6.97188e+07	2.21281e+07	6.61576e+07	5.30583e+07	1.37164e+08	1.8091e+07	6.02977e+07	6.46636e+07	6.89361e+07	1.73556e+07	6.70943e+07	8.10949e+07
442	M101T787	100.51	786.507	13.11	5.05828e+08	1.93844e+07	1.81923e+07	4.68992e+07	1.72402e+07	1.89451e+07	7.32846e+07	1.87864e+07	1.92458e+07	2.05475e+07	1.13194e+08	1.96837e+07	7.18714e+07	6.35956e+07	5.65785e+07	1.12891e+08	1.86075e+08	2.0906e+07	1.95314e+07	2.1454e+07	1.85796e+07	1.71873e+07	8.1495e+07	5.99106e+07	7.99515e+07	5.48768e+07	1.48862e+08	6.77239e+07	5.98817e+07
443	M101T771	100.51	771.075	12.85	1.85926e+07	2.56936e+08	1.51037e+08	5.33584e+07	5.76528e+07	1.75682e+07	6.49589e+07	1.82474e+07	2.53784e+08	5.22256e+07	9.98989e+07	5.09356e+07	2.04971e+07	5.50857e+07	2.02527e+07	1.66876e+07	1.90351e+07	4.64298e+07	1.91512e+07	2.0912e+07	1.66585e+08	1.4351e+08	6.33767e+07	8.03284e+07	5.52766e+07	7.60922e+07	1.75533e+07	7.68804e+07	4.71949e+07
444	M101T76_1	101.008	76.1794	1.27	1.80909e+07	1.11394e+07	1.46413e+08	1.36035e+08	1.38956e+07	1.29548e+07	1.59406e+08	1.67326e+08	1.65838e+08	2.09778e+07	1.78119e+07	1.24626e+07	1.49453e+08	1.49236e+07	1.87881e+07	8.43591e+06	1.69306e+07	1.64824e+07	1.74879e+07	1.85773e+07	2.30233e+07	1.66636e+07	1.97044e+07	1.56701e+07	1.72184e+08	1.67238e+08	2.32292e+07	1.6481e+08	2.26984e+07
445	M101T76_2	101.025	76.3344	1.27	6.06249e+08	6.39008e+08	6.35966e+08	5.77635e+08	6.32087e+08	6.31745e+08	6.84831e+08	6.95999e+08	6.80425e+08	6.5796e+08	6.45869e+08	6.644e+08	5.91444e+08	6.11712e+08	6.28143e+08	6.24682e+08	6.0225e+08	6.15506e+08	6.73985e+08	7.24505e+08	6.99403e+08	7.45531e+08	7.44016e+08	7.56695e+08	7.11596e+08	6.76033e+08	7.07988e+08	6.75646e+08	6.57885e+08
446	M101T210	101.024	209.563	3.49	1.67208e+08	1.06864e+08	3.30614e+07	1.24202e+08	9.4511e+07	2.73706e+07	1.29871e+08	1.21289e+08	9.68875e+07	1.18017e+08	1.13419e+08	1.42198e+08	3.17553e+08	3.16779e+08	3.07526e+08	2.82063e+08	2.57338e+08	2.77258e+08	2.34081e+08	4.66326e+08	2.93968e+08	3.08283e+08	2.32106e+08	3.15175e+08	2.06748e+08	3.20394e+08	2.02094e+08	2.06215e+08	2.18998e+08
447	M101T102	101.023	102.321	1.71	1.12339e+08	5.02883e+07	5.27108e+07	5.20597e+07	4.81663e+07	4.73281e+07	8.87743e+07	9.65994e+07	2.50492e+07	8.69668e+07	9.3222e+07	8.37781e+07	1.27545e+08	1.38594e+08	1.49327e+08	3.278e+07	1.46171e+08	1.51931e+08	1.54712e+08	1.48288e+08	1.36257e+08	1.18254e+08	1.08377e+08	1.59228e+08	1.01543e+08	1.11644e+08	2.86414e+07	2.49627e+07	1.01805e+08
448	M101T94	101.023	94.2371	1.57	8.77334e+06	5.91837e+06	6.19433e+06	2.95343e+07	7.55847e+06	2.37402e+07	8.35892e+07	9.47081e+07	1.87979e+08	7.03907e+07	1.11954e+08	7.86089e+07	1.31687e+08	1.25114e+08	1.28884e+08	1.84733e+08	1.10582e+08	1.3696e+08	1.09209e+08	1.33842e+08	1.53005e+08	1.20752e+08	1.39011e+08	1.21838e+08	1.08215e+08	9.65422e+07	2.43725e+08	1.29149e+08	1.04717e+08
449	M101T146	101.024	145.569	2.43	1.39779e+08	1.0887e+07	1.11091e+07	7.81536e+07	1.15185e+07	2.99508e+07	9.04939e+07	1.67348e+07	1.6484e+07	1.55673e+07	1.65176e+07	1.70644e+07	7.69165e+07	1.04502e+08	8.55355e+07	2.39002e+07	2.17095e+08	1.03696e+08	1.12411e+08	1.53675e+08	3.84811e+08	6.334e+07	1.36961e+08	1.02607e+08	2.2894e+08	9.13562e+07	1.98197e+07	7.7037e+07	7.90441e+07
450	M101T76_3	101.053	76.3374	1.27	3.11615e+07	4.49444e+07	2.73429e+07	4.59687e+07	3.37914e+07	4.98169e+07	2.77681e+07	5.54775e+07	3.13668e+07	4.26166e+07	8.7549e+06	1.24694e+07	3.62463e+07	9.18901e+06	4.09557e+07	8.67365e+06	4.79124e+07	2.13858e+07	5.48425e+07	3.49729e+07	3.81192e+07	3.19846e+07	6.08286e+07	1.18591e+07	5.35771e+07	3.2942e+07	4.62068e+07	2.27888e+07	3.80463e+07
451	M101T103	101.06	103.119	1.72	1.57046e+08	1.63639e+08	1.5688e+08	1.30042e+08	1.40818e+08	1.55375e+08	1.71819e+08	1.7979e+08	1.62371e+08	1.70662e+08	1.77489e+08	1.59151e+08	1.29952e+08	1.18487e+08	1.29927e+08	1.10656e+08	1.29319e+08	1.27151e+08	1.49979e+08	1.92221e+08	1.42668e+08	1.39786e+08	1.34044e+08	1.63091e+08	1.36153e+08	1.478e+08	1.51042e+08	1.31634e+08	1.43889e+08
452	M101T147	101.06	147.471	2.46	8.1146e+07	8.1864e+07	8.53405e+07	8.84957e+07	8.27248e+07	8.59177e+07	8.22561e+07	8.15007e+07	7.2124e+07	8.14912e+07	8.51328e+07	9.32048e+07	7.94293e+07	8.26841e+07	8.01215e+07	7.94464e+07	7.62514e+07	7.81509e+07	8.91942e+07	9.23763e+07	9.33294e+07	9.19905e+07	1.16273e+08	9.641e+07	7.86021e+07	7.34584e+07	8.1758e+07	9.06378e+07	9.56301e+07
453	M101T344	101.059	344.155	5.74	2.60242e+07	3.12602e+07	3.46926e+07	2.66569e+07	2.57867e+07	2.74727e+07	3.02303e+07	2.78491e+07	3.48952e+07	3.57269e+07	2.95072e+07	6.21077e+06	2.82653e+07	4.44148e+07	2.98909e+07	2.96403e+07	3.15057e+07	2.97071e+07	3.73601e+07	2.73345e+07	8.32841e+06	3.335e+07	3.94544e+07	4.53547e+07	2.7143e+07	2.71419e+07	3.00318e+07	4.30515e+07	4.58858e+07
454	M101T360	101.059	359.588	5.99	6.92336e+06	5.85442e+06	6.99911e+06	5.85485e+06	6.24551e+06	6.50718e+06	6.66162e+06	2.46338e+07	7.54986e+06	2.50972e+07	3.07035e+07	7.37512e+06	7.57456e+06	2.53651e+07	3.57313e+07	2.89799e+07	3.27117e+07	2.74398e+07	8.29947e+06	2.98254e+07	7.95226e+06	8.07429e+06	3.65711e+07	3.83682e+07	2.29518e+07	3.07731e+07	3.13107e+07	2.68674e+07	1.74041e+07
455	M101T325	101.06	325.469	5.42	4.50984e+06	3.97616e+06	4.25889e+06	4.36096e+06	4.3314e+06	4.48703e+06	5.09493e+06	3.22794e+07	4.969e+06	1.82087e+07	1.57625e+07	4.7212e+06	5.73775e+06	4.46931e+07	2.03247e+07	2.84828e+07	2.87558e+07	6.10496e+06	7.5751e+06	3.12375e+07	8.37649e+06	8.95131e+06	3.74758e+07	4.75823e+07	3.00111e+07	3.07819e+07	2.03887e+07	2.22254e+07	2.34269e+07
456	M101T429	101.06	429.342	7.16	4.61716e+06	4.23691e+07	5.48919e+06	5.72943e+06	5.14428e+06	5.27177e+06	4.67785e+06	7.36435e+07	4.68632e+06	2.01698e+07	2.29641e+07	4.39083e+06	4.51116e+06	2.54514e+07	1.61506e+07	2.57439e+07	1.63498e+07	2.32201e+07	1.89657e+07	4.88012e+07	5.57194e+06	4.9993e+06	1.68868e+07	2.07311e+07	9.09351e+06	1.25365e+07	1.52863e+07	1.35728e+07	3.90761e+06
457	M101T311	101.059	310.677	5.18	4.43243e+06	4.02468e+06	3.70142e+06	4.25743e+06	4.01593e+06	4.02139e+06	4.8522e+06	1.66556e+07	4.79506e+06	3.48224e+07	2.89069e+07	4.49009e+06	4.73382e+06	2.57718e+07	1.49438e+07	2.22901e+07	2.54316e+07	4.94889e+06	5.07649e+06	2.64174e+07	6.28483e+06	5.82343e+06	2.23605e+07	2.36394e+07	2.20086e+07	2.07046e+07	2.81312e+07	2.4991e+07	2.18716e+07
458	M101T91	101.071	91.0507	1.52	1.1355e+07	1.05582e+07	1.00709e+07	1.2115e+07	4.57657e+06	1.4222e+07	3.65809e+07	3.64497e+07	7.60744e+06	9.46588e+06	2.53229e+07	4.0087e+07	4.40263e+07	4.85648e+07	4.4298e+07	3.57925e+07	4.14642e+07	3.62229e+07	2.98635e+07	3.01031e+07	3.08855e+07	3.0948e+07	1.01741e+07	2.65591e+07	3.0703e+07	2.82768e+07	3.01165e+07	1.0951e+07	3.41416e+07
459	M101T32	101.071	31.8958	0.53	1.13252e+07	7.86348e+06	7.63629e+06	1.1022e+07	3.11111e+06	7.59028e+06	9.54139e+06	3.19791e+06	2.71733e+06	2.49603e+06	1.04999e+07	3.503e+06	3.1408e+06	8.25875e+06	2.52891e+06	9.13503e+06	1.11322e+07	2.87386e+06	7.44821e+06	1.07804e+07	8.13768e+06	7.46827e+06	2.69699e+06	7.95536e+06	7.14011e+06	7.22402e+06	7.05431e+06	9.06349e+06	8.75514e+06
460	M101T838	101.071	837.731	13.96	5.92786e+07	3.14773e+07	9.07668e+07	3.46607e+07	0	3.49243e+07	2.62682e+07	2.93624e+07	3.6812e+07	0	2.78405e+07	3.34188e+07	0	2.14197e+07	1.85073e+07	0	0	0	3.05764e+07	2.64547e+07	2.26473e+07	3.07738e+07	0	0	1.224e+08	0	2.65945e+07	0	2.52253e+07
461	M101T825	101.071	824.702	13.75	9.91592e+06	9.32382e+06	9.73521e+06	3.77666e+07	2.10622e+08	2.62972e+07	3.94594e+07	3.23661e+07	1.02007e+07	1.04786e+08	9.78382e+06	9.89861e+06	9.04969e+06	3.76394e+07	2.64619e+07	1.6889e+08	4.35535e+07	1.03222e+07	1.05388e+07	2.59103e+07	3.52942e+07	2.29396e+07	1.05426e+07	1.27281e+08	1.07971e+07	1.1577e+08	1.04067e+07	1.07017e+07	6.95051e+07
462	M101T68	101.096	68.1535	1.14	4.85307e+06	6.53809e+06	6.52934e+06	6.0033e+06	6.31245e+06	6.42755e+06	6.511e+06	8.18413e+06	6.07342e+06	1.00553e+07	4.42353e+06	1.0952e+07	5.55187e+06	8.08416e+06	1.157e+07	7.60365e+06	6.93295e+06	6.69922e+06	1.16336e+07	6.56882e+06	6.09962e+06	7.83918e+06	7.84844e+06	7.48843e+06	8.32618e+06	7.92498e+06	2.61063e+07	5.57492e+06	7.53325e+06
463	M102T42	102.013	41.5289	0.69	2.13352e+07	1.85761e+07	4.74491e+07	2.54622e+07	3.34466e+07	3.42315e+07	3.35931e+08	1.68833e+07	1.7229e+07	1.79229e+07	2.7074e+07	2.16814e+07	3.43727e+08	2.40858e+07	1.87846e+07	1.8225e+07	3.15525e+08	3.33354e+07	2.04909e+07	4.48718e+07	5.42744e+07	3.40797e+07	2.39966e+07	4.00566e+07	1.85414e+07	3.1424e+07	5.50144e+07	5.6603e+07	1.44585e+07
464	M102T76	102.022	76.3404	1.27	6.2949e+08	7.11207e+08	6.83442e+08	6.81227e+08	7.30865e+08	6.98658e+08	7.54944e+08	7.43332e+08	7.81677e+08	7.43674e+08	7.41691e+08	7.46477e+08	6.5772e+08	6.80076e+08	7.17111e+08	7.04825e+08	6.73162e+08	6.88805e+08	7.6571e+08	7.96834e+08	7.66677e+08	8.1981e+08	7.82525e+08	8.44135e+08	7.88626e+08	8.01177e+08	7.73264e+08	7.61799e+08	7.56155e+08
465	M102T79	102.034	78.5583	1.31	9.95039e+07	1.0447e+08	1.05355e+08	1.38098e+08	9.97557e+07	1.26285e+08	1.89827e+08	2.0468e+08	2.15823e+08	2.1536e+08	7.62423e+08	2.16452e+08	2.04249e+08	2.19417e+08	2.52909e+08	1.93407e+08	2.0661e+08	2.03115e+08	2.78727e+08	3.23305e+08	2.8655e+08	3.04977e+08	2.37712e+08	2.94351e+08	1.96678e+08	1.76499e+08	1.85604e+08	1.98352e+08	2.70444e+08
466	M102T35	102.034	35.0691	0.58	1.34526e+09	1.22263e+09	1.11302e+09	1.41623e+09	1.19578e+09	1.14859e+09	1.45636e+09	1.17149e+09	1.37797e+09	1.34588e+09	1.41758e+09	1.1636e+09	1.09486e+09	1.32838e+09	1.12929e+09	1.36055e+09	1.37766e+09	1.28161e+09	1.23632e+09	1.43694e+09	1.22752e+09	1.55068e+09	1.27743e+09	1.31481e+09	1.3616e+09	1.22063e+09	1.23546e+09	1.51523e+09	1.46111e+09
467	M102T67	102.034	67.4614	1.12	1.55094e+08	1.45558e+08	6.67835e+08	2.97125e+08	1.79981e+08	5.94314e+08	4.64375e+08	1.53902e+08	2.26843e+08	1.74733e+08	1.05434e+08	2.13469e+08	6.42512e+08	6.81955e+08	1.52689e+08	2.18238e+08	1.94945e+08	1.77666e+08	1.76462e+08	2.73861e+08	1.92102e+08	2.63859e+08	2.7195e+08	3.50637e+08	8.54096e+07	1.96028e+08	3.40763e+08	1.52819e+08	9.51112e+07
468	M102T797	102.034	796.56	13.28	1.3954e+08	1.76185e+08	6.14394e+07	8.1557e+07	7.7388e+07	6.92055e+07	1.05223e+08	6.76622e+07	4.36424e+07	6.72573e+07	9.3268e+07	9.48608e+07	1.57418e+07	1.02789e+08	1.55744e+07	1.07058e+08	9.21892e+07	5.99461e+07	9.61907e+07	4.70122e+07	1.11666e+08	9.985e+07	7.188e+07	7.01138e+07	1.06118e+08	2.19334e+08	1.75304e+07	6.96546e+07	6.87895e+07
469	M102T506	102.034	505.798	8.43	1.64098e+09	1.56698e+09	9.05114e+08	1.57622e+09	1.60191e+09	3.66724e+08	1.09716e+09	1.7567e+09	1.71879e+09	3.692e+08	1.90302e+09	2.39641e+09	1.16201e+09	1.96028e+09	1.88301e+09	2.1001e+09	2.9437e+09	2.97327e+09	1.88676e+09	1.86351e+09	1.96865e+09	2.01658e+09	1.81065e+09	1.73582e+09	1.62764e+09	1.65904e+09	9.46759e+08	1.84396e+09	1.02793e+09
470	M102T532	102.034	531.84	8.86	1.69404e+09	1.16493e+09	1.58973e+09	3.64736e+08	1.4655e+09	7.22651e+09	1.73366e+09	3.30443e+09	2.07059e+09	7.49349e+09	2.88103e+09	1.68076e+09	3.20873e+09	8.40201e+08	1.71357e+09	1.89006e+09	5.50845e+09	1.33034e+09	1.82342e+09	5.52157e+09	3.74342e+08	5.33599e+09	8.00633e+08	1.65996e+09	5.26823e+09	5.10893e+09	1.84967e+09	1.66457e+09	3.6642e+08
471	M102T607	102.034	606.872	10.11	1.93715e+09	1.87569e+09	2.01701e+09	2.20647e+09	4.91236e+08	4.81658e+08	1.34133e+09	1.77245e+09	2.80387e+09	1.11925e+09	2.36595e+09	7.08559e+09	1.98445e+09	1.54974e+09	1.04281e+10	2.46592e+09	4.90415e+08	4.9732e+09	1.40074e+09	2.09042e+09	2.40375e+09	2.57532e+09	5.20907e+08	2.35362e+09	1.56545e+09	1.17237e+09	1.17428e+09	1.0109e+09	1.59125e+09
472	M102T486	102.034	485.591	8.09	1.60843e+08	7.15436e+08	6.87136e+08	1.24866e+09	1.46927e+08	1.60366e+08	6.38464e+08	1.81304e+08	8.14887e+08	1.52418e+08	7.3128e+08	1.62609e+08	1.90157e+08	8.82787e+08	1.05154e+09	1.96845e+08	1.09691e+09	8.85042e+08	1.96684e+08	8.17846e+08	9.36104e+08	8.64114e+08	7.93012e+08	7.77717e+08	5.95089e+08	6.60556e+08	1.83843e+08	7.79585e+08	7.18283e+08
473	M102T580	102.034	580.206	9.67	3.04261e+09	3.52311e+09	1.22487e+09	1.97789e+09	4.47457e+09	7.62047e+09	1.45762e+09	1.6863e+09	4.56446e+09	2.45934e+09	2.98959e+09	6.64523e+08	1.17985e+09	6.99694e+08	6.51291e+08	5.77851e+09	1.43186e+09	1.42402e+09	1.38322e+09	3.02395e+09	5.55792e+09	5.13347e+09	7.41293e+09	2.58771e+09	1.81323e+09	4.205e+09	6.96164e+09	1.33082e+09	7.13385e+08
474	M102T444	102.034	444.124	7.4	6.1906e+08	8.4894e+08	8.59106e+08	2.35226e+08	5.70008e+08	2.25961e+08	1.33311e+08	8.07473e+08	1.74626e+08	7.25549e+08	8.51497e+08	1.9857e+08	8.68929e+08	2.28439e+08	9.98808e+08	9.01572e+08	9.02329e+08	9.23516e+08	8.88719e+08	2.32551e+08	2.30305e+08	2.29766e+08	4.51864e+08	8.39839e+08	1.19108e+08	1.25772e+08	8.19337e+08	8.49186e+08	1.21807e+08
475	M102T551	102.034	551.288	9.19	1.58181e+09	9.6707e+08	1.43781e+09	1.23093e+09	8.58965e+08	2.73742e+08	1.44804e+09	1.68805e+09	1.62163e+09	2.96814e+08	1.29215e+09	1.53919e+09	1.34064e+09	1.31985e+09	1.64615e+09	2.70666e+09	3.43233e+08	1.89599e+09	1.81714e+09	3.12616e+08	3.18709e+08	3.15639e+08	1.32312e+09	1.47052e+09	2.92e+08	3.01382e+08	2.75207e+08	1.38915e+09	1.33351e+09
476	M102T466	102.034	465.997	7.77	2.89025e+09	1.86683e+09	8.03158e+08	1.91275e+09	4.60515e+08	4.41273e+08	5.54341e+08	3.04706e+09	1.2953e+09	4.34226e+08	4.87738e+08	2.95119e+09	2.23471e+09	1.21921e+09	2.12107e+09	3.46149e+09	2.07647e+09	1.54631e+09	3.77093e+09	1.10115e+09	1.05247e+09	2.2027e+09	8.391e+08	4.93542e+08	5.43417e+08	5.58213e+08	3.18121e+09	1.40755e+09	7.809e+08
477	M102T617	102.033	616.926	10.28	2.62943e+08	2.09661e+09	3.25051e+08	1.49445e+09	1.73203e+09	1.06608e+09	1.07072e+09	3.17469e+08	3.11604e+08	1.31556e+09	1.98409e+09	3.15955e+08	1.81143e+09	1.51573e+09	3.30054e+08	2.87499e+08	3.34442e+08	3.19629e+08	1.83113e+09	1.5225e+09	3.41171e+08	2.81367e+08	1.34456e+09	2.89025e+08	2.89815e+08	1.15909e+09	3.07942e+08	1.33085e+09	1.33151e+09
478	M102T819	102.033	819.059	13.65	3.65189e+07	5.49288e+07	1.1807e+07	3.69736e+07	2.29179e+07	2.44475e+07	5.32738e+07	3.6724e+07	6.75871e+07	3.24486e+07	1.2324e+07	3.65017e+07	1.03158e+08	3.77392e+07	8.95131e+07	1.02319e+07	9.13086e+07	3.43587e+07	7.00029e+07	1.20491e+07	4.95811e+07	4.31219e+07	3.93424e+07	1.1212e+08	1.12794e+08	9.79279e+06	1.20687e+08	3.87158e+07	4.76627e+07
479	M102T665	102.034	664.764	11.08	1.7906e+09	1.60545e+09	4.92846e+08	1.64969e+09	1.18756e+09	2.36147e+09	5.09418e+08	1.21573e+10	4.97225e+08	4.57794e+08	4.93264e+08	4.76719e+08	3.97976e+09	4.03093e+08	1.04898e+10	1.62086e+09	4.92313e+08	3.93831e+09	1.81695e+09	1.53519e+09	9.09654e+09	3.85018e+08	5.07214e+08	4.49141e+09	2.79136e+09	1.21161e+09	4.68947e+08	1.36431e+09	2.01741e+09
480	M102T724	102.034	723.679	12.06	1.73877e+08	1.64785e+08	1.59251e+08	5.26648e+08	3.1108e+08	1.5934e+08	8.08045e+08	5.55908e+08	1.31053e+09	1.5997e+08	1.80921e+08	7.09573e+08	6.68083e+08	5.4449e+08	1.13826e+08	1.70036e+08	5.17325e+08	8.14052e+08	2.7347e+09	5.5673e+08	5.88992e+08	5.54202e+08	1.60509e+09	4.66612e+08	4.49027e+08	5.64946e+08	1.4653e+08	1.56272e+08	1.76074e+08
481	M102T769	102.034	768.716	12.81	3.92354e+07	4.32788e+07	4.07221e+07	1.91246e+08	4.46607e+08	2.25906e+08	9.7791e+07	4.58898e+07	1.39411e+08	4.52191e+07	4.38392e+07	4.2691e+07	3.59484e+07	9.71725e+07	2.88035e+07	1.56549e+08	2.33771e+08	2.31054e+08	4.35139e+07	1.00229e+08	1.90871e+08	1.98403e+08	4.00184e+08	4.71293e+07	1.9885e+08	1.65757e+08	3.04402e+07	4.36216e+07	1.30094e+08
482	M102T779	102.034	778.661	12.98	1.49788e+08	2.09448e+08	1.18477e+08	1.44229e+08	3.07259e+07	1.50118e+08	8.79838e+07	3.11854e+07	7.02351e+07	2.1301e+08	3.52932e+07	1.75262e+08	1.39799e+08	9.67348e+07	8.90834e+07	8.69805e+07	3.50314e+07	9.34545e+07	3.75845e+07	2.56949e+07	1.33737e+08	3.27074e+07	3.56902e+07	1.33346e+08	1.5463e+08	3.20957e+07	1.21895e+08	1.32467e+08	3.70747e+07
483	M102T209	102.027	208.639	3.48	3.68148e+07	3.7206e+07	3.49814e+07	4.20746e+07	4.5467e+07	3.70897e+07	3.46189e+07	1.68587e+08	3.70471e+08	4.0905e+07	3.8133e+07	3.42956e+07	1.02034e+07	2.96561e+08	2.12533e+08	8.54651e+07	1.53088e+08	1.50451e+08	3.53545e+07	1.07037e+07	3.01395e+07	1.22876e+07	1.0147e+07	9.50143e+06	5.24563e+06	6.97018e+06	4.61079e+06	6.05322e+06	7.99458e+06
484	M102T714	102.034	714.3	11.9	1.53356e+09	2.20825e+08	7.44528e+08	6.39592e+08	7.10891e+08	5.88081e+08	1.06046e+09	1.89012e+08	1.77062e+08	1.84176e+08	2.21206e+08	9.3558e+08	6.75403e+08	4.05022e+08	1.46282e+08	1.87616e+08	6.48125e+08	7.13222e+08	2.11285e+08	6.66396e+08	4.54205e+08	7.11489e+08	2.24816e+08	1.0872e+09	8.54391e+08	6.39565e+08	5.3639e+08	1.59302e+09	1.89588e+09
485	M102T655	102.034	655.392	10.92	1.34386e+09	1.56945e+09	1.81202e+09	1.58889e+09	1.42338e+09	1.56205e+09	6.03504e+09	6.00287e+08	2.81269e+09	5.41984e+08	9.72115e+09	5.45465e+09	6.13599e+08	8.13867e+09	5.1499e+08	5.40862e+08	1.16404e+10	6.1871e+08	1.76269e+09	1.37134e+09	6.27846e+08	8.02793e+09	2.6235e+09	6.19073e+08	5.44323e+08	5.77169e+08	4.39378e+09	2.43346e+09	2.38807e+09
486	M102T787	102.033	786.937	13.12	1.80535e+07	2.14599e+07	9.09345e+07	2.3787e+07	6.13863e+07	1.80519e+07	1.82428e+07	1.14741e+08	7.80034e+07	8.55555e+07	2.17554e+08	9.52661e+07	1.72168e+07	1.69598e+07	8.87656e+07	2.1637e+07	2.17341e+07	6.64337e+07	9.38192e+07	9.13923e+07	2.14909e+07	7.10017e+07	1.2604e+08	9.54665e+07	2.14272e+07	1.95257e+07	1.66237e+07	8.4764e+07	9.24283e+07
487	M102T625	102.034	625.206	10.42	3.90058e+09	3.54146e+08	1.90631e+09	1.35591e+09	1.18681e+09	1.78858e+09	1.4908e+09	3.24012e+08	2.02615e+09	3.41458e+08	2.05435e+09	3.40357e+08	1.59416e+09	2.89569e+08	3.63713e+08	1.71543e+09	3.61879e+08	3.68722e+08	3.47884e+09	1.32597e+09	3.33914e+08	3.36406e+08	1.40117e+09	1.75704e+09	1.77852e+09	3.27582e+08	1.61237e+09	9.39187e+08	1.34665e+09
488	M102T690	102.034	690.481	11.51	1.30457e+09	2.0891e+09	3.39637e+09	3.5643e+09	1.3682e+09	1.88487e+09	8.24595e+08	3.737e+08	1.8581e+09	4.18669e+08	3.7793e+08	1.5049e+09	1.17333e+09	7.60175e+08	3.11058e+08	3.85286e+09	2.71029e+08	4.06361e+08	2.78094e+09	2.74845e+09	1.78598e+08	1.50819e+08	2.5906e+09	9.642e+08	1.59735e+09	5.70087e+08	6.52158e+08	4.00061e+08	1.728e+09
489	M102T520	102.034	520.335	8.67	1.11315e+09	1.09258e+09	1.21874e+09	1.37968e+09	2.70113e+08	2.37533e+08	1.25171e+09	2.44133e+08	1.23176e+09	3.04263e+08	2.74259e+08	2.49483e+08	2.68154e+08	1.44899e+09	1.37075e+09	1.36866e+09	2.9539e+08	3.04677e+08	1.48903e+09	2.76902e+08	2.73856e+08	2.91613e+08	1.47294e+09	1.54435e+09	3.18133e+08	3.15244e+08	1.27518e+09	1.56416e+09	2.86701e+09
490	M102T676	102.033	676.26	11.27	1.69139e+09	1.56514e+09	3.73924e+08	1.07491e+09	1.34517e+09	1.13551e+09	3.84209e+08	3.54448e+08	1.06581e+09	1.12485e+10	3.63086e+08	3.49146e+08	8.09325e+08	2.22002e+08	3.44491e+08	1.80328e+09	2.58111e+08	4.49879e+08	3.63999e+08	3.42029e+08	3.19045e+08	2.03735e+08	2.77218e+09	3.87046e+08	1.27535e+09	9.24963e+08	1.16057e+09	1.2137e+09	1.27941e+09
491	M102T757	102.034	757.28	12.62	1.71071e+08	2.78802e+08	5.33979e+07	1.83081e+08	4.46073e+07	4.26001e+07	1.41006e+08	2.30186e+08	2.39549e+08	4.06228e+07	2.59414e+08	5.16829e+07	4.05404e+07	4.24166e+07	1.29049e+08	2.48277e+08	1.9005e+08	2.81102e+08	2.9317e+08	3.9535e+07	2.03153e+08	2.24295e+08	5.43413e+07	2.35894e+08	2.2295e+08	2.10847e+08	4.83609e+08	4.77436e+07	2.9975e+08
492	M102T237	102.034	237.344	3.96	5.11942e+07	5.04068e+07	5.58565e+07	5.26777e+07	5.30753e+07	5.14722e+07	5.04807e+07	1.9889e+08	2.57524e+08	4.63369e+07	5.13172e+07	4.66971e+07	5.02208e+07	1.55787e+07	2.11242e+08	1.4312e+08	3.10261e+08	1.29966e+08	1.57921e+07	1.00783e+07	1.49238e+07	1.44365e+07	5.37301e+07	4.77246e+07	1.0641e+07	4.52533e+07	1.02992e+07	1.38439e+07	5.3532e+07
493	M102T743	102.034	743.328	12.39	2.71861e+08	4.52437e+08	4.93686e+08	1.10748e+08	8.70988e+07	3.11443e+08	8.64177e+07	2.69863e+08	2.44118e+08	8.20721e+07	9.23661e+07	6.6512e+08	2.75933e+08	2.87466e+08	2.77528e+08	9.78826e+08	3.58201e+08	4.2975e+08	9.73895e+07	2.97942e+08	9.85545e+07	4.12785e+08	5.15225e+08	2.8845e+08	9.02933e+07	3.22481e+08	7.24983e+07	1.03338e+08	3.21962e+08
494	M102T147	102.055	147.486	2.46	3.84033e+08	4.12717e+08	3.97645e+08	3.45331e+08	3.8069e+08	3.5591e+08	4.00349e+08	4.01607e+08	3.67742e+08	3.89758e+08	3.50508e+08	5.2176e+08	4.47972e+08	5.02012e+08	4.80166e+08	5.32721e+08	5.81096e+08	4.85124e+08	2.9016e+08	3.03916e+08	3.32414e+08	3.33737e+08	3.6141e+08	3.34154e+08	3.83697e+08	3.87034e+08	4.07725e+08	3.92822e+08	4.13595e+08
495	M102T92	102.055	92.2645	1.54	3.17695e+08	3.25978e+08	3.37414e+08	3.33245e+08	3.55135e+08	3.56675e+08	5.57075e+08	5.25628e+08	4.77519e+08	5.06984e+08	5.11718e+08	5.92762e+08	5.89392e+08	5.83747e+08	5.69018e+08	6.14366e+08	5.73336e+08	5.93765e+08	5.47556e+08	5.46824e+08	5.53883e+08	5.42513e+08	5.52996e+08	5.91354e+08	5.79969e+08	5.48407e+08	5.45394e+08	5.12523e+08	5.391e+08
496	M102T128	102.055	128.073	2.13	4.32192e+08	4.18095e+08	2.81276e+08	4.46245e+08	3.08195e+08	4.40698e+08	4.99978e+08	4.96063e+08	4.79572e+08	5.1759e+08	4.51909e+08	7.01903e+08	6.42449e+08	6.48458e+08	6.3885e+08	7.26007e+08	6.63143e+08	6.56797e+08	4.14028e+08	6.96932e+08	5.24969e+08	4.27348e+08	5.12232e+08	4.3704e+08	5.49329e+08	5.54276e+08	3.62068e+08	5.36659e+08	5.94549e+08
497	M102T104	102.055	103.851	1.73	1.64327e+08	4.0295e+07	1.64486e+08	4.11744e+07	1.77995e+08	1.69732e+08	2.80442e+08	5.51431e+07	3.00405e+08	2.70322e+08	2.53325e+08	3.54125e+08	2.48926e+08	2.25471e+08	2.40905e+08	6.1605e+07	2.75451e+08	4.58739e+07	4.01153e+07	1.64601e+08	1.96067e+08	1.71386e+08	2.28917e+08	2.09228e+08	2.19653e+08	2.16115e+08	2.00481e+08	2.0165e+08	1.88334e+08
498	M102T113	102.055	112.56	1.88	3.13433e+08	5.19133e+08	2.51909e+08	4.2446e+08	3.7281e+08	2.1368e+08	2.86544e+08	5.43867e+08	7.68736e+07	9.77929e+07	3.24147e+08	4.31319e+08	2.75294e+08	5.27722e+08	3.91213e+08	6.66651e+08	5.70178e+08	5.19988e+08	4.49488e+08	7.77777e+07	3.26817e+08	7.38328e+07	7.51085e+07	3.8477e+08	3.61089e+08	3.9248e+08	3.94909e+08	2.47801e+08	9.36685e+07
499	M102T347	102.046	346.769	5.78	1.04342e+08	1.03455e+08	8.40179e+06	4.59335e+06	8.81409e+06	2.63993e+07	6.92024e+06	5.74366e+06	5.02362e+06	9.25284e+07	5.49662e+06	6.83268e+06	1.15839e+08	9.28896e+07	4.2825e+06	4.30606e+06	8.46508e+07	4.83679e+06	4.01798e+06	9.68907e+07	1.12006e+08	1.04938e+08	8.74711e+07	9.489e+07	5.79479e+06	1.02614e+08	9.7432e+07	5.83105e+06	8.84541e+07
500	M102T33	102.128	32.9001	0.55	2.10491e+07	1.85638e+07	2.15665e+07	2.00621e+07	1.40321e+07	1.28011e+07	1.34582e+07	1.53871e+07	2.07107e+07	1.88157e+07	1.44357e+07	1.5626e+07	1.50574e+07	1.77934e+07	1.04911e+07	1.17131e+07	1.4628e+07	1.99379e+07	1.88822e+07	1.20934e+07	1.91508e+07	1.78023e+07	2.04987e+07	1.88763e+07	2.23349e+07	2.12648e+07	1.89315e+07	1.3107e+07	1.348e+07
501	M103T35_1	102.536	35.0691	0.58	1.15892e+08	1.09605e+08	1.10771e+08	9.40498e+07	1.05626e+08	1.05417e+08	1.30106e+08	1.09201e+08	1.15307e+08	1.20637e+08	9.71457e+07	1.19869e+08	9.54107e+07	1.08344e+08	9.75708e+07	1.13804e+08	1.25445e+08	1.14773e+08	1.07978e+08	1.11883e+08	1.06721e+08	1.43243e+08	1.21865e+08	1.16157e+08	1.35231e+08	1.11368e+08	1.0024e+08	1.32878e+08	1.30001e+08
502	M103T76_1	102.54	76.2891	1.27	1.19095e+08	1.2214e+08	1.34167e+08	1.22034e+08	1.39191e+08	1.17761e+08	1.33912e+08	1.41579e+08	1.23321e+08	1.44474e+08	1.1439e+08	1.24666e+08	1.06313e+08	1.063e+08	1.04083e+08	1.19222e+08	9.72381e+07	1.06105e+08	8.16353e+07	1.29165e+08	1.26325e+08	8.51149e+07	1.23482e+08	1.11676e+08	1.6318e+08	1.50435e+08	1.58948e+08	1.29424e+08	9.1092e+07
503	M103T662	102.536	662.011	11.03	1.35072e+08	1.99e+08	1.59121e+08	4.64549e+07	5.87484e+08	2.62313e+08	1.26099e+08	1.27818e+08	9.13888e+08	1.29841e+08	4.90367e+07	3.96142e+08	1.35055e+08	4.25131e+07	4.16826e+07	1.44234e+08	6.336e+08	5.04589e+07	2.73933e+07	2.01901e+08	8.13575e+08	1.99514e+08	7.78085e+08	1.36132e+08	2.77835e+08	3.0673e+07	1.37676e+08	1.41729e+08	1.72724e+07
504	M103T605	102.536	605.209	10.09	1.56982e+08	1.51115e+08	1.71917e+08	1.74721e+08	3.84991e+07	1.99995e+08	1.08103e+08	3.80606e+07	5.92336e+08	1.80365e+08	2.23866e+08	1.45044e+08	3.66932e+07	1.36678e+08	1.66297e+08	1.20406e+08	1.67089e+08	2.3005e+08	1.62695e+08	3.69968e+08	1.90764e+08	3.89262e+07	1.83189e+08	2.27598e+08	4.10849e+07	3.75655e+07	1.2354e+08	1.56908e+08	4.05229e+07
505	M103T551	102.536	551.146	9.19	1.09258e+08	8.47671e+07	8.84223e+07	2.66441e+07	2.4879e+07	2.69234e+07	1.13362e+08	3.09966e+07	1.16387e+08	9.73245e+07	2.78775e+07	3.19647e+07	2.07023e+08	1.13311e+08	1.7323e+08	1.52577e+08	3.20744e+07	2.96729e+07	3.2656e+07	3.08272e+07	1.0848e+08	2.56926e+07	1.38498e+08	2.65909e+07	2.63643e+07	2.19266e+08	2.75693e+07	1.34461e+08	1.17354e+08
506	M103T505	102.536	505.269	8.42	2.4776e+07	1.05447e+08	7.17691e+07	2.68432e+07	1.2341e+08	2.9955e+07	7.8757e+07	2.87837e+07	1.61224e+08	1.34402e+08	1.40842e+08	1.33391e+08	3.3637e+07	1.68294e+08	1.66458e+08	1.91416e+08	1.90688e+08	8.31425e+07	1.53697e+08	2.80715e+07	1.74593e+08	3.33764e+07	1.47351e+08	3.2168e+07	1.4784e+08	2.77979e+07	3.13856e+07	6.90166e+07	1.41745e+08
507	M103T566	102.536	566.254	9.44	9.32469e+07	4.75843e+08	2.92224e+08	3.84604e+07	3.75078e+07	1.2586e+08	4.27039e+07	3.56653e+08	3.91798e+07	1.92681e+08	4.08557e+07	1.45271e+08	1.79195e+08	1.04504e+08	1.40849e+08	1.89548e+08	1.09858e+08	4.09726e+07	3.32169e+08	1.14677e+08	1.53216e+08	3.3695e+07	1.04247e+08	1.51841e+08	4.02183e+07	1.74138e+08	1.21171e+08	8.67867e+07	2.13869e+08
508	M103T444	102.536	444.31	7.41	1.97e+07	7.07861e+07	4.11578e+07	2.05673e+07	2.02912e+07	8.99942e+07	7.43646e+06	8.02553e+07	1.50339e+07	4.8869e+07	6.49183e+07	5.8638e+07	1.83574e+07	9.19559e+07	1.72481e+07	7.07604e+07	8.31017e+07	7.00491e+07	1.97321e+07	1.89445e+07	1.93333e+07	1.92151e+07	1.12342e+07	7.52522e+07	1.07029e+07	5.89478e+06	7.01346e+07	1.63072e+07	4.81054e+07
509	M103T649	102.536	649.49	10.82	1.36666e+08	4.16859e+07	1.57427e+08	3.90722e+07	4.22392e+07	1.52857e+08	4.27212e+07	1.73472e+08	3.95219e+07	1.644e+08	3.47718e+08	4.44581e+07	3.22071e+08	7.52279e+08	2.43804e+08	4.01218e+07	4.44721e+07	3.79711e+08	1.52483e+08	1.41815e+08	3.93506e+07	3.99559e+07	4.49932e+07	1.98756e+08	1.24041e+08	2.82478e+07	1.11609e+08	4.17667e+07	1.18219e+08
510	M103T532	102.536	532.264	8.87	2.2107e+08	3.81825e+07	1.21818e+08	3.69096e+07	3.82472e+07	3.53685e+07	1.39211e+08	3.84218e+08	1.591e+08	4.03545e+07	3.83523e+07	3.89026e+07	4.44605e+07	1.16349e+08	3.0643e+08	1.62826e+08	1.3357e+08	3.992e+07	1.63999e+08	7.73348e+08	3.6526e+07	3.90993e+07	3.84805e+07	1.69971e+08	3.758e+07	3.85577e+07	6.16002e+08	6.96458e+07	1.46684e+08
511	M103T79	102.97	78.5252	1.31	7.13963e+07	7.86525e+07	7.12997e+07	7.67999e+07	7.43217e+07	8.28158e+07	1.6371e+08	1.62501e+08	1.73826e+08	1.64549e+08	1.66859e+08	1.85955e+08	1.59522e+08	1.64011e+08	1.91395e+08	1.58812e+08	1.61243e+08	1.60962e+08	1.98412e+08	2.91937e+08	2.51215e+08	2.61401e+08	1.81018e+08	2.00104e+08	1.45702e+08	1.5608e+08	1.55233e+08	1.84728e+08	2.069e+08
512	M103T143	102.97	142.855	2.38	5.7549e+07	6.62185e+07	4.78722e+07	1.14486e+08	6.46639e+07	4.41728e+07	1.22987e+08	3.56685e+07	5.31092e+07	5.45254e+07	4.95156e+07	4.20692e+07	4.70094e+07	3.99271e+07	3.90322e+08	3.58109e+08	4.02465e+07	9.34003e+07	4.14092e+07	3.25172e+07	4.42348e+07	4.16786e+07	4.11013e+08	2.97963e+07	3.82307e+07	4.34235e+07	2.34748e+08	3.03653e+08	3.11322e+08
513	M103T54	102.97	54.2607	0.9	8.67724e+07	6.21193e+07	1.35747e+08	9.1981e+07	2.00312e+08	6.53855e+07	1.09261e+08	1.45724e+08	6.97954e+07	1.44911e+08	6.13954e+07	5.69775e+07	1.52787e+08	1.42744e+08	1.37305e+08	1.4354e+08	8.64668e+07	6.96518e+07	1.38358e+08	1.55017e+08	1.40076e+08	1.27756e+08	5.27542e+07	5.76767e+07	7.49249e+07	1.83621e+08	1.35757e+08	8.76437e+07	8.38071e+07
514	M103T280	102.97	280.291	4.67	1.94623e+08	8.78838e+07	8.50507e+07	1.60891e+08	1.7453e+08	2.37169e+08	1.1235e+08	2.17035e+08	1.3463e+08	8.56425e+07	2.42775e+08	1.47415e+08	6.67903e+07	1.49975e+08	8.78458e+07	1.40652e+08	5.88198e+07	1.56688e+08	6.12526e+07	1.70501e+08	5.50865e+07	5.60121e+07	1.1361e+08	1.53098e+08	1.08438e+08	7.44537e+07	6.73753e+07	1.24574e+08	5.4455e+07
515	M103T233	102.97	232.737	3.88	1.20862e+08	5.5371e+07	1.22206e+08	3.16354e+07	1.55116e+08	1.36215e+08	8.5556e+07	7.31818e+07	1.05779e+08	9.61794e+07	9.12537e+07	9.22129e+07	8.72594e+07	8.7948e+07	8.64076e+07	2.5582e+08	1.09992e+08	8.23025e+07	2.82984e+08	5.66341e+07	3.17423e+08	8.79525e+07	2.74182e+08	3.17343e+08	5.54743e+07	4.50586e+07	9.67595e+07	9.79554e+07	2.36471e+08
516	M103T254	102.97	253.957	4.23	1.33521e+08	6.86595e+07	9.15632e+07	7.3697e+07	4.90475e+07	2.62226e+08	6.83466e+07	1.12309e+08	1.54724e+08	1.03647e+08	1.08457e+08	1.6392e+08	1.71212e+08	2.00181e+08	1.83161e+08	1.68585e+08	7.34867e+07	1.51563e+08	1.84851e+08	1.09371e+08	7.07813e+07	9.22376e+07	2.47361e+08	1.99763e+08	9.76557e+07	5.37766e+07	1.35081e+08	1.36268e+08	1.6717e+08
517	M103T270	103.005	270.398	4.51	2.40556e+07	1.98136e+07	2.435e+07	5.43394e+07	5.23482e+07	3.64052e+07	2.40514e+07	1.69902e+07	5.12522e+07	2.40458e+07	7.75341e+07	2.5621e+07	3.44217e+07	2.04227e+07	2.01679e+07	4.72698e+07	4.10175e+07	1.75927e+07	4.14666e+07	2.51539e+07	2.78606e+07	2.31643e+07	1.37296e+07	3.71299e+07	3.54095e+07	4.81641e+07	4.7302e+07	4.58998e+07	2.42993e+07
518	M103T263	103.005	263.432	4.39	2.39016e+07	2.74938e+07	2.90525e+07	4.09987e+07	4.69619e+07	1.81433e+07	2.45237e+07	6.78729e+07	5.93319e+07	2.93887e+07	5.0711e+07	2.66682e+07	1.64763e+07	3.08786e+07	1.46402e+07	1.1561e+08	9.77958e+07	2.11711e+07	1.0339e+08	2.24352e+07	2.95917e+07	2.26942e+07	1.63595e+07	1.35557e+08	1.86216e+07	7.91658e+07	7.43225e+07	8.59755e+07	3.02371e+07
519	M103T35_2	103.032	35.0867	0.58	7.44596e+06	5.4393e+06	9.80275e+06	7.17679e+06	8.47913e+06	9.13335e+06	8.37107e+06	1.1657e+07	9.26508e+06	8.14701e+06	1.2814e+08	6.62161e+06	1.47363e+07	5.80798e+06	6.40441e+06	1.82792e+07	6.79106e+06	1.48252e+07	2.18611e+07	1.68833e+07	1.01158e+07	1.04984e+07	1.00999e+07	2.02161e+07	8.38108e+06	8.316e+06	8.84121e+06	9.12736e+06	7.08174e+06
520	M103T102	103.039	102.329	1.71	3.24219e+08	2.73345e+08	2.84204e+08	3.29335e+08	3.02889e+08	2.82193e+08	1.17833e+09	1.51221e+09	9.52442e+08	2.22251e+09	1.34528e+09	2.73394e+09	9.69408e+09	2.09229e+09	1.71464e+09	1.54697e+09	2.10058e+09	1.7532e+09	2.16084e+09	1.84755e+09	2.00552e+09	3.59384e+09	3.22428e+09	2.38886e+09	9.48368e+08	1.31428e+09	4.1817e+09	4.33477e+09	1.74594e+09
521	M103T219	103.039	218.68	3.64	7.81415e+08	9.39392e+08	1.11242e+09	1.13145e+09	1.06049e+09	1.69469e+09	7.51395e+08	1.6063e+09	1.45122e+09	1.56705e+09	8.49631e+08	7.05057e+08	9.46335e+08	1.00394e+09	8.78192e+08	1.41228e+09	9.13099e+08	8.77841e+08	1.03354e+09	3.98761e+09	2.44851e+09	1.13982e+09	2.1339e+09	1.64884e+09	1.04089e+09	1.09267e+09	8.09568e+08	1.03091e+09	1.10175e+09
522	M103T144	103.039	143.821	2.4	5.0997e+08	2.76594e+08	3.01032e+08	3.09915e+08	1.7792e+08	2.82733e+08	1.12763e+09	2.99344e+09	1.3098e+09	9.95317e+08	9.62163e+08	6.50965e+08	4.83034e+08	2.32067e+09	1.59932e+09	1.12497e+09	1.05092e+09	1.89028e+09	1.69132e+09	3.19509e+09	1.20194e+09	3.87588e+09	2.80093e+09	1.44708e+09	1.11367e+09	2.59097e+09	3.29858e+09	6.46244e+08	1.2878e+09
523	M103T269	103.039	268.823	4.48	1.93751e+08	2.37997e+08	4.63472e+08	2.14721e+08	7.36901e+08	8.08203e+08	6.84053e+08	4.3369e+08	2.79927e+08	3.31573e+08	2.93864e+08	4.74103e+08	2.07039e+09	9.46286e+08	9.22104e+08	6.18714e+08	7.63722e+08	3.21824e+08	1.01497e+09	5.8624e+08	6.15656e+08	5.00395e+08	5.44964e+08	4.55207e+08	3.61265e+08	3.05934e+08	3.33315e+08	3.2055e+08	1.78388e+09
524	M103T94	103.039	94.4541	1.57	1.55645e+08	1.361e+08	1.1467e+08	3.11151e+07	3.12173e+07	1.34195e+08	6.13373e+08	6.68509e+08	4.70395e+08	1.41648e+08	6.20951e+08	1.53267e+08	1.98764e+08	9.29216e+08	9.87236e+08	1.10445e+09	9.18215e+08	9.90256e+08	1.0567e+09	1.13462e+09	9.29287e+08	2.02993e+08	1.87321e+08	8.3109e+08	6.5658e+08	7.54919e+08	2.07485e+08	1.6715e+08	6.65064e+08
525	M103T169	103.039	169.161	2.82	1.45204e+08	4.16958e+08	2.16402e+08	3.66713e+08	1.16367e+08	3.76566e+08	4.19012e+08	1.00762e+08	3.30001e+08	3.33585e+08	4.12167e+08	3.97504e+08	7.19385e+08	8.12205e+08	5.44986e+08	9.03755e+08	8.90507e+08	7.61425e+08	5.59055e+08	8.93446e+08	1.05202e+09	7.61559e+08	9.14701e+08	1.1924e+09	3.40577e+08	7.79055e+07	1.09208e+08	6.65019e+08	1.25317e+09
526	M103T245	103.039	244.599	4.08	1.63881e+08	1.43469e+08	1.12612e+08	1.0227e+08	3.35213e+07	3.33635e+07	5.74663e+07	2.02501e+08	1.94557e+08	6.043e+08	2.34151e+08	2.83544e+08	1.03985e+08	5.92431e+08	4.59033e+08	7.96737e+08	2.86218e+08	3.07938e+08	3.70779e+08	1.42939e+08	6.89244e+08	3.73331e+08	1.12465e+08	9.88409e+08	1.60493e+08	2.64024e+08	4.35587e+08	1.91222e+08	8.89825e+07
527	M103T286	103.039	286.259	4.77	1.64837e+08	3.19866e+07	9.00825e+07	1.42833e+08	3.03738e+07	3.27882e+07	1.58956e+08	5.61705e+07	3.20935e+08	5.37459e+07	2.61754e+08	3.02854e+08	8.97612e+07	7.36831e+08	3.668e+08	8.36833e+07	4.92609e+08	2.40219e+08	9.10942e+07	3.76825e+08	4.44901e+08	1.14653e+08	4.69079e+08	4.94117e+08	1.80746e+08	5.96012e+07	4.76672e+08	2.24879e+08	7.44074e+07
528	M103T122	103.039	122.305	2.04	2.18115e+08	5.32827e+08	5.81974e+08	2.86302e+08	5.449e+08	2.04048e+08	5.36335e+08	1.17391e+09	7.87043e+08	8.43303e+08	1.30375e+09	3.16069e+08	5.12865e+08	3.35727e+09	1.92021e+09	1.36126e+09	1.78125e+09	1.8206e+09	2.63615e+09	3.7273e+09	2.45648e+09	1.57642e+09	2.41058e+09	4.38761e+09	7.31238e+08	6.92386e+08	3.16655e+08	3.49909e+08	1.00154e+09
529	M103T191	103.039	190.768	3.18	1.75917e+08	1.87986e+08	8.60776e+07	1.32085e+08	9.7201e+07	2.66653e+08	3.14532e+08	7.79598e+07	2.58072e+08	8.34258e+08	7.42385e+07	9.40465e+07	5.64397e+08	1.42029e+08	4.01777e+08	6.14613e+08	4.24275e+08	1.30497e+08	1.50776e+08	1.70212e+08	5.30199e+08	6.82447e+08	6.82023e+08	1.87531e+09	4.29821e+08	2.50512e+08	2.46554e+08	3.72716e+08	1.19617e+08
530	M103T200	103.039	199.583	3.33	1.77992e+08	1.36961e+08	1.64317e+08	2.03818e+08	1.43609e+08	3.22319e+07	6.83085e+07	7.46092e+07	2.82399e+08	7.96366e+07	7.45152e+07	9.51891e+07	5.59877e+08	4.75531e+08	3.77635e+08	4.86645e+08	4.16927e+08	6.18879e+08	5.38829e+08	1.82735e+08	6.78341e+08	1.83826e+08	1.61447e+08	1.63554e+08	3.02672e+08	7.67284e+07	2.9344e+08	5.32791e+08	1.25159e+08
531	M103T148	103.058	147.506	2.46	1.32962e+07	1.44893e+07	1.40355e+07	1.17069e+07	1.69453e+07	1.33596e+07	1.4324e+07	1.36516e+07	1.67889e+07	1.53824e+07	1.29937e+07	1.98421e+07	1.83114e+07	1.79479e+07	2.12013e+07	4.24465e+07	2.12114e+07	1.69859e+07	1.2218e+07	1.07527e+07	9.6926e+06	1.45227e+07	1.42565e+07	1.47823e+07	1.65693e+07	1.60298e+07	1.56486e+07	1.53747e+07	1.65217e+07
532	M103T347	103.054	346.77	5.78	4.26599e+08	4.12249e+08	4.36001e+08	3.96071e+08	4.81997e+08	4.2357e+08	3.99579e+08	3.52706e+08	3.48943e+08	3.80725e+08	3.41152e+08	3.75619e+08	2.49621e+08	2.64575e+08	2.73491e+08	3.09035e+08	2.44298e+08	2.5176e+08	2.66194e+08	2.59663e+08	2.56308e+08	3.08968e+08	2.98356e+08	3.08037e+08	3.52079e+08	3.60729e+08	3.33349e+08	3.60181e+08	3.477e+08
533	M103T237	103.054	237.384	3.96	3.72104e+08	3.65475e+08	3.89551e+08	4.08049e+08	4.12483e+08	4.32328e+08	4.66996e+08	5.72316e+08	3.8456e+08	5.05071e+08	6.33285e+08	6.72289e+08	6.22569e+08	6.00798e+08	4.31337e+08	4.2753e+08	5.12916e+08	4.54533e+08	5.27409e+08	6.22172e+08	5.92049e+08	5.24042e+08	3.7718e+08	5.49258e+08	4.90027e+08	4.88766e+08	4.75549e+08	5.81439e+08	5.02305e+08
534	M103T76_2	103.05	76.2016	1.27	6.53824e+07	5.93227e+07	3.69718e+07	7.00653e+07	6.72862e+07	7.79615e+07	6.74601e+07	6.73632e+07	7.25479e+07	7.3381e+07	4.06565e+07	7.33962e+07	6.25012e+07	5.39398e+07	6.4126e+07	7.28521e+07	5.47253e+07	6.34946e+07	6.65864e+07	7.17111e+07	7.18869e+07	8.41854e+07	7.02092e+07	4.61123e+07	6.85264e+07	6.46956e+07	7.39292e+07	8.50116e+07	7.25879e+07
535	M103T92	103.058	92.2552	1.54	1.33796e+07	1.41719e+07	9.06689e+06	2.49281e+06	2.36833e+06	3.2083e+06	1.88415e+07	1.7039e+07	1.72241e+07	1.91661e+07	1.83084e+07	1.94187e+07	2.21828e+07	2.28388e+07	2.50324e+07	2.12552e+07	2.02375e+07	1.96645e+07	1.98325e+07	1.85524e+07	2.10462e+07	2.04297e+07	3.89566e+06	2.08307e+07	2.73361e+07	1.79817e+07	2.10751e+07	1.86976e+07	2.06065e+07
536	M103T214	103.054	214.464	3.57	9.87815e+07	1.02155e+08	1.16518e+08	4.5249e+07	1.19889e+08	9.41508e+07	1.085e+08	7.58823e+07	1.01647e+08	1.49556e+08	4.28648e+07	3.51418e+07	1.18889e+08	1.68821e+08	1.28335e+08	8.28701e+07	1.33003e+08	1.10114e+08	1.36934e+08	1.68867e+08	1.87369e+08	1.5257e+08	4.15464e+07	1.26981e+08	1.41295e+08	1.49565e+08	1.45847e+08	3.20598e+07	1.39641e+08
537	M104T35	104.03	35.054	0.58	3.39248e+07	2.62842e+07	2.79063e+07	2.22401e+07	3.14053e+07	2.59678e+07	3.1178e+07	2.79724e+07	3.26042e+07	3.31973e+07	2.70032e+07	3.03734e+07	2.20843e+07	2.94877e+07	2.64073e+07	3.15605e+07	2.99879e+07	2.82407e+07	2.68143e+07	2.48055e+07	2.78081e+07	3.34492e+07	3.371e+07	3.54855e+07	3.49519e+07	2.58996e+07	3.19515e+07	3.43565e+07	7.51329e+06
538	M104T76	104.034	76.2552	1.27	3.81357e+07	4.55529e+07	3.24953e+07	2.13673e+07	4.68196e+07	3.9431e+07	1.52112e+07	3.83416e+07	4.91852e+07	6.02404e+07	5.13325e+07	2.64867e+07	5.54402e+07	7.12824e+07	6.6747e+07	6.69772e+07	6.04859e+07	3.73018e+07	7.87294e+07	4.92583e+07	8.42716e+07	9.25052e+07	9.45287e+07	8.65088e+07	2.8658e+07	3.55003e+07	1.59072e+07	1.87747e+07	8.13623e+07
539	M104T102	104.042	102.335	1.71	1.76794e+07	1.4912e+07	1.28817e+07	1.03269e+07	1.44112e+07	1.73458e+07	5.76402e+07	6.82736e+07	2.54729e+07	1.67441e+07	6.24159e+07	1.57761e+07	2.09221e+07	3.17517e+08	1.69952e+08	6.87777e+07	8.69598e+07	7.41114e+07	9.70104e+07	7.72897e+07	1.76262e+08	1.65203e+08	9.46022e+07	5.74342e+07	1.29666e+08	4.6355e+07	1.9687e+08	4.05718e+07	6.13109e+07
540	M104T237	104.058	237.348	3.96	3.48127e+07	3.3919e+07	3.30014e+07	3.69606e+07	2.83528e+07	3.89023e+07	4.29169e+07	5.28178e+07	3.40473e+07	4.47807e+07	5.37348e+07	4.99938e+07	5.21733e+07	3.40535e+07	3.08857e+07	3.8457e+07	4.97463e+07	3.52354e+07	4.33747e+07	5.79627e+07	5.70267e+07	4.86303e+07	3.05701e+07	5.28309e+07	4.98099e+07	4.49743e+07	3.768e+07	4.19708e+07	4.94844e+07
541	M104T151	104.053	151.343	2.52	1.7253e+07	1.80979e+07	1.70836e+07	1.5631e+07	1.69487e+07	1.6605e+07	2.31175e+07	1.52682e+07	2.78403e+07	2.2383e+07	1.73806e+07	2.43729e+07	1.33111e+07	1.28267e+07	3.83968e+07	1.58849e+07	3.45491e+07	1.61519e+07	8.52842e+06	6.27808e+06	4.50632e+06	1.0566e+07	1.5379e+07	3.48664e+07	1.69401e+07	1.41457e+07	1.39822e+07	1.53131e+07	1.79988e+07
542	M104T347	104.058	346.771	5.78	3.6047e+07	3.52299e+07	4.00114e+07	3.86103e+07	4.73929e+07	3.86474e+07	1.41669e+07	3.25191e+07	3.16393e+07	3.58663e+07	2.59573e+07	3.66687e+07	3.24351e+06	2.25091e+07	2.76599e+07	8.57353e+06	2.3152e+07	2.47316e+07	9.98616e+06	2.55168e+07	1.92817e+07	3.22575e+07	1.11617e+07	9.5326e+06	1.29244e+07	3.42462e+07	2.9945e+07	1.16905e+07	2.97598e+07
543	M104T92	104.072	92.184	1.54	1.11446e+09	1.11664e+09	1.22468e+09	1.17438e+09	1.19901e+09	1.22956e+09	1.8684e+09	1.63093e+09	1.17778e+09	1.41696e+09	1.54441e+09	2.50205e+09	3.33145e+09	3.67992e+09	3.32014e+09	3.14802e+09	3.19413e+09	2.85815e+09	2.27777e+09	2.79663e+09	2.75354e+09	2.75361e+09	2.36909e+09	2.61855e+09	2.37575e+09	2.1794e+09	2.27371e+09	2.18163e+09	2.19931e+09
544	M104T159	104.07	159.13	2.65	1.27942e+08	9.64312e+07	1.00149e+08	1.15568e+08	1.15905e+08	2.5224e+08	2.23604e+08	1.16586e+08	8.98004e+07	2.25605e+08	9.90368e+07	1.10758e+08	1.0505e+08	1.00872e+08	9.88683e+07	4.4031e+08	9.77799e+07	8.88875e+07	8.01587e+07	8.78976e+07	8.93476e+07	9.83698e+07	1.80002e+08	8.02984e+07	1.25314e+08	1.28776e+08	1.13516e+08	1.02384e+08	1.08022e+08
545	M104T104	104.07	103.866	1.73	1.84087e+08	1.66261e+08	1.76436e+08	1.66989e+08	1.91496e+08	1.59899e+08	1.88123e+08	1.86803e+08	1.54253e+08	1.40692e+08	1.7156e+08	2.43357e+08	1.65411e+08	2.18481e+08	2.0029e+08	3.1948e+08	2.1564e+08	1.80061e+08	1.63293e+08	1.82279e+08	1.90975e+08	1.66016e+08	1.41992e+08	1.48778e+08	2.9453e+08	2.04924e+08	2.01975e+08	2.04364e+08	1.38526e+08
546	M104T36	104.071	36.3215	0.61	3.58997e+08	3.97672e+08	4.59892e+08	4.13235e+08	3.13217e+08	3.70287e+08	3.97719e+08	4.47402e+08	5.60389e+08	3.90792e+08	3.37483e+08	4.15852e+08	2.31464e+08	2.27597e+08	3.67221e+08	2.10377e+08	2.98951e+08	2.39509e+08	3.35379e+08	3.04421e+08	1.92613e+08	3.23092e+08	1.95889e+08	2.96066e+08	7.09324e+08	4.14518e+08	3.20033e+08	3.27713e+08	2.89823e+08
547	M104T89_1	104.107	89.101	1.49	4.08617e+10	3.95982e+10	4.09504e+10	3.87231e+10	4.11991e+10	4.08657e+10	4.21088e+10	3.99485e+10	4.18067e+10	4.02499e+10	3.81124e+10	3.74548e+10	3.58969e+10	3.58133e+10	3.56266e+10	3.97703e+10	3.82173e+10	3.68871e+10	3.59202e+10	3.3996e+10	3.53475e+10	3.46952e+10	4.03243e+10	3.97751e+10	3.87471e+10	3.9051e+10	3.97139e+10	3.77357e+10	3.95609e+10
548	M104T107	104.107	106.745	1.78	2.12418e+09	2.34259e+09	2.73914e+09	3.08439e+09	2.93028e+09	2.0385e+09	3.86796e+09	3.94632e+09	2.93231e+09	3.89829e+09	4.03931e+09	3.35389e+09	2.59625e+09	2.74184e+09	2.42239e+09	2.73897e+09	2.58848e+09	2.42921e+09	2.40145e+09	2.74519e+09	2.83719e+09	2.89663e+09	2.83517e+09	2.91421e+09	2.95248e+09	2.45584e+09	3.03688e+09	2.62117e+09	2.61796e+09
549	M104T154	104.107	154.402	2.57	3.26847e+08	3.08957e+08	2.8335e+08	3.11097e+08	1.939e+08	1.49808e+08	2.5809e+08	1.62767e+08	6.52772e+07	5.89891e+07	1.48566e+08	5.85343e+07	1.67187e+08	1.01838e+08	1.7527e+08	2.32455e+08	1.37095e+08	2.62463e+08	1.68923e+08	1.81986e+08	1.20977e+08	2.87562e+08	2.32966e+08	2.28832e+08	1.4471e+08	2.3431e+08	2.39752e+08	2.56463e+08	2.90519e+08
550	M104T142	104.107	141.807	2.36	3.07648e+08	7.07966e+07	3.40903e+08	3.30306e+08	6.81045e+07	3.13125e+08	2.68071e+08	2.24947e+08	7.48913e+07	6.56726e+07	6.57784e+07	6.73494e+07	2.29996e+08	2.57439e+08	1.776e+08	2.52304e+08	2.7507e+08	3.76285e+08	1.88793e+08	3.14543e+08	2.23743e+08	2.58781e+08	1.63476e+08	1.41988e+08	3.26587e+08	3.78461e+08	7.1483e+07	3.59443e+08	3.12265e+08
551	M104T126	104.107	126.314	2.11	4.69869e+08	8.84452e+08	8.14783e+08	6.33331e+08	8.48001e+08	5.21627e+08	4.89091e+08	5.39283e+08	1.18457e+08	1.23516e+08	4.5138e+08	4.80617e+08	3.46956e+08	3.72476e+08	8.09695e+08	4.21434e+08	3.63966e+08	4.07895e+08	4.31683e+08	4.42938e+08	5.33156e+08	3.39851e+08	3.3925e+08	2.76393e+08	5.47451e+08	6.17219e+08	8.61303e+08	3.85748e+08	3.32628e+08
552	M104T171	104.107	171.114	2.85	1.43731e+08	1.27631e+08	1.76571e+08	1.54244e+08	1.60894e+08	3.70931e+07	1.6506e+08	1.34099e+08	3.82155e+07	3.70141e+07	1.55884e+08	3.75263e+07	3.02102e+07	1.30495e+08	8.88979e+07	1.82845e+08	9.57873e+07	1.13557e+08	3.0847e+07	3.3021e+07	1.15184e+08	1.48236e+08	2.42743e+08	1.18509e+08	3.79327e+07	2.02624e+08	3.65071e+07	1.56593e+08	1.90087e+08
553	M104T179	104.107	178.843	2.98	3.62913e+07	1.73135e+08	1.23377e+08	1.18581e+08	3.57841e+07	3.41406e+07	3.35317e+07	3.65122e+07	3.44244e+07	1.93747e+09	1.17961e+08	1.17137e+09	3.0472e+07	1.1326e+08	3.11368e+07	1.17634e+08	3.36575e+07	1.40848e+08	1.29136e+08	2.17188e+08	3.39362e+07	3.61143e+07	3.30413e+07	1.37057e+08	3.65351e+08	3.10037e+07	3.42193e+07	1.14937e+08	1.47649e+08
554	M104T288	104.107	287.546	4.79	8.17691e+08	2.21055e+08	7.57415e+08	1.25533e+08	6.6997e+07	7.19672e+07	1.08848e+08	2.18991e+08	8.8412e+08	1.44511e+08	3.11048e+08	5.97752e+08	5.31424e+07	1.10751e+08	1.21011e+08	8.21786e+08	1.31657e+08	3.03691e+08	5.53845e+07	5.81881e+07	5.89588e+07	1.91512e+08	7.20319e+08	2.66795e+08	6.95749e+08	8.44154e+08	1.40265e+08	3.00465e+08	1.63135e+08
555	M104T234	104.107	233.861	3.9	6.82052e+07	9.33604e+07	1.541e+07	8.08074e+07	1.75459e+07	1.66265e+07	1.13258e+08	7.99771e+07	1.73488e+07	9.0814e+07	1.46617e+07	5.34049e+07	1.37164e+07	1.48102e+07	1.3483e+07	5.74615e+07	1.47786e+07	9.97242e+07	1.36732e+07	1.54505e+07	8.17962e+07	1.6606e+07	1.59524e+07	1.78552e+07	1.01791e+08	6.81934e+07	1.54511e+07	6.24057e+07	8.22573e+07
556	M104T215	104.107	214.599	3.58	6.42643e+07	7.3954e+07	2.14662e+07	7.72065e+07	2.20869e+07	2.15307e+07	7.17949e+07	1.7828e+07	1.9398e+07	2.15655e+07	1.92792e+07	1.86831e+07	1.9311e+07	6.18704e+07	5.59444e+07	1.40107e+08	1.82262e+07	6.70824e+07	1.92106e+07	1.24898e+08	1.90798e+07	2.03231e+07	1.00276e+08	1.10472e+08	7.05628e+07	8.9924e+07	2.06823e+07	6.92758e+07	1.18612e+08
557	M104T199	104.107	199.395	3.32	3.0377e+07	1.44208e+08	3.33968e+07	1.05833e+08	2.92989e+07	2.99787e+07	2.24742e+08	3.80101e+08	2.32053e+09	3.05862e+07	2.846e+07	2.67593e+07	1.08217e+08	9.51859e+07	2.61438e+07	6.19734e+07	2.53532e+07	2.8277e+07	2.691e+07	3.00335e+07	2.90718e+08	3.30918e+07	9.15514e+07	2.03897e+08	9.4773e+07	9.33131e+07	3.04829e+07	9.40339e+07	8.64489e+07
558	M104T375	104.107	374.573	6.24	3.05816e+07	9.41032e+06	3.54093e+07	2.12695e+07	9.3335e+06	8.20014e+06	2.49143e+07	4.43483e+07	2.57797e+07	4.80204e+07	8.44469e+06	2.12117e+07	7.51699e+06	8.5505e+06	8.31594e+06	1.76112e+07	7.51343e+06	2.84044e+07	6.49841e+06	6.98098e+06	6.70806e+06	6.48063e+06	7.70816e+06	1.92291e+07	1.04301e+07	3.56294e+07	8.69174e+06	7.40467e+07	6.94383e+07
559	M104T89_2	104.142	89.3267	1.49	6.4511e+07	6.19515e+07	7.03235e+07	3.61731e+07	1.00903e+10	5.44883e+07	5.23572e+07	5.01443e+07	1.0334e+10	9.63426e+09	5.66006e+07	4.53311e+07	3.07216e+07	8.53071e+09	8.52984e+09	4.23227e+07	2.74358e+07	9.1562e+09	5.56491e+07	8.71475e+09	9.0449e+09	8.76654e+09	7.32838e+07	9.70938e+09	3.70337e+07	4.83664e+07	9.51056e+09	5.51028e+07	9.37508e+09
560	M105T76_1	104.526	76.2173	1.27	7.13334e+07	6.76156e+07	5.97895e+07	6.27788e+07	7.40543e+07	1.55599e+07	6.6493e+07	6.94181e+07	6.40339e+07	6.58466e+07	7.28914e+07	4.41162e+07	7.41659e+07	1.60446e+07	7.75423e+07	7.66232e+07	7.80546e+07	8.00847e+07	9.3778e+07	8.8067e+07	2.68806e+07	9.33444e+07	7.9406e+07	8.20814e+07	6.39999e+07	7.49796e+07	6.79994e+07	7.2041e+07	1.89398e+07
561	M105T76_2	105.003	76.444	1.27	1.97385e+09	2.1422e+09	2.10828e+09	2.1443e+09	2.29647e+09	2.14146e+09	2.34765e+09	2.53894e+09	2.33108e+09	2.31307e+09	2.22033e+09	2.37668e+09	1.97554e+09	2.02259e+09	2.20436e+09	2.07141e+09	2.1119e+09	2.15244e+09	2.40646e+09	2.46158e+09	2.52534e+09	2.41697e+09	2.40246e+09	2.59792e+09	2.28615e+09	2.21719e+09	2.34825e+09	2.3701e+09	2.39474e+09
562	M105T61	105.003	61.0281	1.02	1.45887e+07	1.07471e+07	1.18993e+07	1.47867e+07	1.50714e+07	2.62868e+06	2.86774e+06	1.24885e+07	1.51564e+07	3.09158e+06	1.46417e+07	2.27193e+06	9.74315e+06	8.4602e+06	3.22983e+06	1.09078e+07	2.4034e+06	1.3785e+07	1.16201e+07	1.06491e+07	2.72232e+06	1.48522e+07	2.80935e+06	2.76564e+06	3.08102e+06	2.55842e+06	2.84392e+06	1.46289e+07	8.47251e+06
563	M105T52	105.003	52.2866	0.87	4.22794e+06	4.39374e+06	1.34688e+06	4.37412e+06	2.4043e+06	1.54823e+07	1.44415e+07	3.29124e+06	1.2195e+06	1.40725e+06	1.23218e+06	1.13793e+06	3.75372e+06	2.17933e+06	1.38122e+07	3.89106e+06	1.20224e+06	1.36977e+06	1.10772e+06	3.82283e+06	1.29193e+07	1.35401e+06	1.36415e+06	1.27628e+06	1.4469e+06	6.5168e+06	1.33615e+07	1.8681e+06	6.26994e+06
564	M105T76_3	105.042	76.2122	1.27	1.4801e+07	2.41038e+07	1.78203e+07	1.56121e+07	5.48249e+08	1.65513e+07	5.57743e+08	2.78581e+07	1.58477e+07	2.15406e+07	1.69352e+07	1.50497e+07	1.3993e+07	1.56929e+07	3.11927e+07	2.90075e+07	5.35096e+08	3.04887e+07	3.35746e+07	2.55208e+07	1.9507e+07	2.55305e+07	2.67917e+07	3.19116e+07	1.41048e+07	3.1085e+07	2.02661e+07	2.22389e+07	2.98119e+07
565	M105T33	105.054	32.8291	0.55	2.32533e+07	7.11923e+07	7.54623e+07	8.19219e+07	9.75471e+07	8.21182e+07	9.06122e+07	7.04087e+07	6.5191e+07	8.7646e+07	7.04408e+07	7.19725e+07	1.78013e+07	8.19557e+07	6.29929e+07	8.12284e+07	1.79109e+07	1.69922e+07	7.844e+07	7.7295e+07	6.385e+07	7.36476e+07	1.45437e+07	7.3267e+07	8.95622e+07	7.40689e+07	9.38068e+07	1.685e+07	1.48375e+07
566	M105T388	105.07	388.394	6.47	7.38518e+08	7.90551e+08	8.14939e+08	8.04201e+08	8.35514e+08	8.76527e+08	9.48388e+08	1.06305e+09	8.04869e+08	9.78184e+08	1.26989e+09	1.16138e+09	1.06769e+09	1.02393e+09	8.71526e+08	8.31296e+08	9.61224e+08	8.37014e+08	1.01697e+09	1.24615e+09	1.20705e+09	1.12247e+09	8.74228e+08	1.06955e+09	9.31866e+08	9.60899e+08	9.93499e+08	9.8967e+08	1.02311e+09
567	M105T347	105.07	346.769	5.78	1.26658e+07	1.61728e+07	1.57882e+07	1.05339e+07	2.52649e+07	1.25115e+07	1.39969e+07	1.21285e+07	1.36132e+07	1.33692e+07	1.49492e+07	1.26457e+07	2.50786e+07	9.50397e+06	2.01897e+07	1.03523e+07	2.25689e+07	2.58529e+07	2.51953e+07	1.11596e+07	1.05392e+07	1.16538e+07	2.77421e+07	1.14804e+07	2.51989e+07	1.05398e+07	1.06459e+07	1.18922e+07	1.48723e+07
568	M105T496	105.069	495.804	8.26	1.72275e+07	1.90925e+07	4.52343e+07	1.85956e+07	1.94513e+07	1.80572e+07	1.7447e+07	1.84101e+07	2.13064e+07	1.74594e+07	1.78673e+07	1.95498e+07	1.67434e+07	2.31031e+07	1.67645e+07	1.78205e+07	1.39038e+07	1.73864e+07	1.56741e+07	1.92802e+07	1.39688e+07	2.85789e+07	1.66281e+07	3.37627e+07	1.90269e+07	2.06519e+07	1.33186e+07	2.11834e+07	1.89108e+07
569	M105T92	105.074	92.2022	1.54	4.59296e+07	4.50118e+07	4.91546e+07	4.1352e+07	4.96703e+07	4.03782e+07	6.13987e+07	6.74332e+07	3.94864e+07	5.58792e+07	6.382e+07	9.44506e+07	1.4198e+08	1.53531e+08	1.38908e+08	1.24986e+08	1.38507e+08	1.12832e+08	9.7742e+07	1.09752e+08	1.0836e+08	1.08841e+08	9.2782e+07	1.12995e+08	8.5485e+07	9.46762e+07	9.37651e+07	7.59207e+07	9.32292e+07
570	M105T36	105.074	36.2566	0.6	1.34515e+07	1.58609e+07	1.69396e+07	1.51971e+07	2.35234e+07	1.45927e+07	1.71139e+07	2.07339e+07	1.67148e+07	1.94225e+07	1.05838e+07	1.0913e+07	8.4197e+06	3.39424e+07	7.70486e+06	9.4823e+06	1.09349e+07	3.69541e+07	1.37839e+07	9.02838e+06	3.33554e+07	3.3707e+07	3.15809e+07	2.85288e+07	2.97024e+07	1.99595e+07	1.40324e+07	1.26127e+07	1.01825e+07
571	M105T89	105.11	89.0886	1.48	2.2398e+09	2.20204e+09	2.2868e+09	2.13681e+09	2.28765e+09	2.26268e+09	2.29143e+09	2.25726e+09	2.29263e+09	2.17864e+09	2.13016e+09	2.01115e+09	1.93396e+09	1.91382e+09	1.92478e+09	2.1637e+09	2.11043e+09	2.01452e+09	1.99939e+09	1.84824e+09	1.97966e+09	1.90198e+09	2.20176e+09	2.16983e+09	2.113e+09	2.22171e+09	2.10908e+09	2.0763e+09	2.12145e+09
572	M105T107	105.11	106.841	1.78	8.74573e+07	1.19601e+08	1.45978e+08	1.4549e+08	1.46331e+08	1.13508e+08	1.88933e+08	2.0779e+08	1.29575e+08	2.09684e+08	2.166e+08	1.49849e+08	1.21662e+08	1.14775e+08	1.57957e+08	1.34686e+08	1.43088e+08	1.3388e+08	1.05562e+08	3.91714e+07	5.06719e+07	1.26783e+08	4.10661e+07	1.31957e+08	6.02985e+07	1.37871e+08	4.68617e+07	1.30004e+08	1.6671e+08
573	M106T76	106.004	76.3344	1.27	2.57129e+08	2.86481e+08	2.8687e+08	2.7394e+08	3.12892e+08	2.79818e+08	3.20791e+08	3.33123e+08	3.16739e+08	2.92369e+08	2.82536e+08	2.95422e+08	2.60702e+08	2.62064e+08	2.88496e+08	2.81556e+08	2.67119e+08	2.77051e+08	3.16533e+08	3.29426e+08	3.44686e+08	3.2732e+08	3.12627e+08	3.38462e+08	3.00288e+08	2.92765e+08	2.82349e+08	3.15991e+08	3.25281e+08
574	M106T89_1	106.05	89.3267	1.49	3.92139e+08	4.22362e+08	3.89781e+08	3.98743e+08	4.08608e+08	3.80468e+08	1.06239e+09	1.06831e+09	9.50516e+08	1.07699e+09	1.08538e+09	1.15457e+09	2.27881e+09	2.12769e+09	2.28345e+09	2.28512e+09	2.41276e+09	2.16205e+09	2.46931e+09	2.14769e+09	2.40891e+09	2.10054e+09	2.15518e+09	2.18359e+09	1.55056e+09	1.38268e+09	1.47674e+09	1.41849e+09	1.43505e+09
575	M106T105	106.05	104.623	1.74	8.46479e+07	4.62603e+07	7.46581e+07	7.32069e+07	6.40694e+07	6.20537e+07	9.79062e+07	1.2287e+08	9.15158e+07	1.09886e+08	8.66682e+07	1.12622e+08	2.2818e+08	2.04335e+08	1.53858e+08	1.21627e+08	9.77957e+07	1.71812e+08	1.92064e+08	1.5886e+08	2.03647e+08	1.28533e+08	1.77234e+08	1.0757e+08	1.44391e+08	1.11327e+08	4.18471e+07	1.00781e+08	9.75177e+07
576	M106T388	106.073	388.412	6.47	6.19956e+07	6.61985e+07	6.85279e+07	6.70073e+07	7.04126e+07	7.47282e+07	8.47682e+07	9.5175e+07	7.10057e+07	8.41228e+07	1.0564e+08	1.01467e+08	8.67205e+07	9.06251e+07	7.53532e+07	6.92216e+07	8.38469e+07	7.3165e+07	8.68037e+07	1.10756e+08	1.04306e+08	9.5664e+07	1.88169e+07	8.98045e+07	7.68598e+07	8.45467e+07	8.47453e+07	8.68763e+07	2.05125e+07
577	M106T89_2	106.086	88.6027	1.48	6.59064e+07	7.1775e+07	2.25583e+07	6.69935e+07	1.74242e+07	2.13647e+07	2.41588e+07	2.22192e+07	1.68234e+08	1.18384e+07	1.25694e+07	3.25966e+07	3.0477e+08	3.10409e+08	2.57701e+07	3.01448e+08	2.74423e+07	2.70501e+08	3.08632e+08	2.52509e+08	2.93443e+08	2.47925e+08	3.81073e+07	3.32116e+08	2.23628e+07	2.44607e+07	2.58689e+07	2.31843e+07	1.63805e+07
578	M106T89_3	106.112	89.135	1.49	7.77555e+07	7.19476e+07	8.5786e+07	8.46098e+07	9.64837e+07	9.30555e+07	9.3968e+07	7.3472e+07	8.41499e+07	7.86182e+07	7.95106e+07	8.17874e+07	3.6747e+08	7.47503e+07	3.84665e+08	3.75254e+08	3.77291e+08	8.23009e+07	7.66881e+07	6.93932e+07	3.46271e+08	2.92158e+08	6.98122e+07	3.46425e+08	8.04938e+07	2.54511e+08	8.39298e+07	8.06656e+07	2.33948e+08
579	M107T268	106.524	267.849	4.46	1.47371e+07	2.05691e+07	1.25272e+07	2.30681e+07	2.47783e+07	1.45142e+07	4.69949e+06	2.17161e+07	1.27165e+07	2.51589e+07	2.16318e+07	1.19548e+07	5.16129e+06	9.49436e+06	1.98415e+07	1.6768e+07	2.11942e+07	1.29208e+07	1.87325e+07	1.85506e+07	1.64021e+07	1.86874e+07	1.79287e+07	1.2839e+07	2.33524e+07	1.66203e+07	1.43483e+07	2.27183e+07	2.84978e+07
580	M107T50	106.992	50.4392	0.84	6.95589e+06	9.76959e+06	2.40225e+06	8.80578e+06	6.52451e+06	1.12764e+07	5.41527e+06	5.26831e+06	2.9555e+06	2.29743e+06	3.13008e+06	2.77899e+06	2.79251e+06	5.22093e+06	7.49773e+06	2.37937e+06	7.49814e+06	8.27895e+06	7.62497e+06	6.4984e+06	2.77756e+06	3.98674e+06	6.63949e+06	2.74888e+06	2.17298e+06	2.37884e+06	2.49018e+06	6.77292e+06	6.71427e+06
581	M107T76	107.001	76.444	1.27	2.9067e+08	3.27208e+08	3.24031e+08	3.07861e+08	3.54835e+08	3.37007e+08	3.56067e+08	3.70119e+08	3.63972e+08	3.45754e+08	3.46612e+08	3.74731e+08	3.00786e+08	3.26705e+08	3.4975e+08	3.17636e+08	3.26949e+08	3.36552e+08	3.91577e+08	3.87777e+08	3.87532e+08	3.72454e+08	3.58074e+08	4.07372e+08	3.53573e+08	3.46992e+08	3.53558e+08	3.4891e+08	3.52123e+08
582	M107T347	107.049	346.767	5.78	1.3251e+08	1.14996e+08	1.32207e+08	1.28657e+08	1.36309e+08	1.2608e+08	1.24224e+08	1.16196e+08	1.13637e+08	1.13889e+08	1.15945e+08	1.25113e+08	1.06514e+08	1.03283e+08	1.05669e+08	1.12838e+08	1.02146e+08	8.16745e+07	1.02743e+08	1.08523e+08	8.18852e+07	1.00717e+08	1.04645e+08	1.14474e+08	1.14334e+08	1.11205e+08	1.21412e+08	1.19853e+08	1.23541e+08
583	M107T748	107.049	747.669	12.46	1.18751e+07	1.00612e+07	6.45133e+06	8.94529e+06	1.20434e+07	1.15381e+07	1.35442e+07	1.15852e+07	1.1129e+07	1.23392e+07	1.16366e+07	1.14254e+07	1.12547e+07	1.24115e+07	1.13947e+06	2.57855e+06	1.53117e+07	9.64135e+06	1.7886e+06	1.32173e+06	8.97928e+06	2.64902e+06	1.0988e+07	9.89644e+06	1.09629e+07	1.10713e+07	9.31932e+06	1.131e+07	1.26437e+07
584	M107T459	107.085	458.604	7.64	2.99238e+07	3.09921e+07	3.87311e+07	3.35026e+07	4.1174e+07	3.31628e+07	2.285e+07	3.67805e+07	3.28725e+07	3.79901e+07	4.02262e+07	3.76324e+07	2.51584e+07	3.58629e+07	5.70587e+07	2.54598e+07	3.16707e+07	2.2142e+07	4.0085e+07	4.32962e+07	3.9853e+07	4.31244e+07	2.04941e+07	3.25174e+07	2.64602e+07	5.96236e+06	2.34544e+07	3.86713e+07	2.34724e+07
585	M107T470	107.085	470.132	7.84	2.45506e+07	2.65873e+07	2.79783e+07	2.94421e+07	2.96621e+07	5.84516e+06	4.6e+06	2.58367e+07	2.15998e+07	2.50817e+07	3.00425e+07	2.39048e+07	1.7456e+07	2.33589e+07	4.45168e+06	1.99528e+07	2.0407e+07	1.9106e+07	4.37038e+06	2.88563e+07	5.79422e+06	2.51262e+07	4.02205e+06	2.43263e+07	2.06393e+07	2.99123e+07	2.49926e+07	2.24327e+07	1.87085e+07
586	M107T496	107.085	496.046	8.27	1.72913e+07	2.18611e+07	4.95172e+06	2.07203e+07	5.04216e+06	5.34777e+07	3.79516e+06	2.40126e+07	2.28341e+07	2.49084e+07	2.61225e+07	2.53276e+07	2.14384e+07	2.22979e+07	2.25247e+07	2.57122e+07	2.49943e+07	2.41086e+07	2.18727e+07	2.99682e+07	2.6299e+07	2.90378e+07	4.03607e+06	2.83697e+07	4.6015e+06	3.5604e+06	2.3682e+07	2.29166e+07	3.91635e+06
587	M107T552	107.085	552.079	9.2	3.22615e+06	1.77254e+07	1.9666e+07	1.56986e+07	3.95012e+06	3.70695e+06	4.87861e+06	1.79899e+07	3.89208e+06	2.63885e+07	2.16151e+07	1.9027e+07	1.7549e+07	2.12934e+07	1.92157e+07	4.82998e+06	1.56877e+07	1.47715e+07	1.99657e+07	2.40137e+07	2.24716e+07	2.17772e+07	2.03239e+07	2.25272e+07	2.19e+07	1.77897e+07	2.44687e+07	1.53315e+07	4.80411e+06
588	M107T443	107.086	442.942	7.38	1.22005e+07	1.34175e+07	1.25301e+07	1.29647e+07	1.43301e+07	1.26417e+07	2.27561e+06	3.59548e+06	3.19886e+06	1.14617e+07	1.25169e+07	1.06068e+07	2.31321e+06	1.03956e+07	2.38171e+06	2.05546e+07	2.10082e+06	9.76004e+06	2.29934e+06	1.13872e+07	1.20522e+07	1.02162e+07	428634	1.38365e+07	2.21443e+06	902520	3.51649e+06	1.1228e+07	0
589	M107T434	107.086	434.235	7.24	1.75205e+07	1.67231e+07	3.18961e+06	1.64994e+07	3.56927e+06	1.32804e+07	1.04707e+07	3.02689e+07	4.02768e+07	2.04775e+07	1.47921e+07	1.86185e+07	2.03829e+06	2.58303e+06	1.89853e+06	1.96601e+06	2.69744e+06	2.02104e+06	2.58973e+06	2.42328e+06	2.23936e+06	2.16169e+06	9.93372e+06	2.80901e+06	1.06003e+07	8.68948e+06	3.1326e+06	3.52969e+06	1.03864e+07
590	M107T519	107.085	518.75	8.65	2.6017e+06	1.64869e+07	1.74243e+07	1.74347e+07	3.84869e+06	3.9416e+06	1.92607e+07	4.33641e+06	3.61417e+06	3.68682e+06	2.08617e+07	2.3285e+07	1.35469e+07	3.64192e+06	3.29508e+06	2.95976e+06	3.56504e+06	3.24374e+06	1.72534e+07	2.49828e+07	2.21327e+07	2.46722e+07	2.12936e+07	2.33515e+07	2.09207e+07	2.11706e+07	2.01441e+07	2.16307e+07	4.22022e+06
591	M108T125	107.505	124.897	2.08	1.46853e+08	1.45779e+08	9.99595e+07	4.80009e+07	1.48633e+08	1.10396e+08	1.38459e+08	3.90084e+07	6.02935e+07	5.09199e+07	1.44999e+08	5.26123e+07	4.04329e+07	4.81985e+07	4.00837e+07	1.12672e+08	4.71274e+07	3.82622e+07	4.3808e+07	1.01923e+08	4.21562e+07	6.55867e+07	4.35942e+07	2.60293e+07	1.25814e+08	1.14257e+08	1.13876e+08	1.24809e+08	4.12362e+07
592	M108T384	108.081	383.607	6.39	2.97271e+07	1.37504e+08	1.48164e+08	2.9956e+07	3.0888e+07	1.21905e+08	2.92106e+07	1.33525e+08	3.21699e+07	3.1805e+07	1.16718e+08	8.35797e+07	3.27338e+07	1.19179e+08	6.61435e+07	1.63206e+08	1.45605e+08	1.39531e+08	6.35702e+07	5.39079e+07	6.79977e+07	2.84901e+07	1.13631e+08	3.1474e+07	8.46178e+07	1.16242e+08	3.21697e+07	4.84414e+07	6.36279e+07
593	M109T207	108.513	206.561	3.44	359849	455506	510323	275353	390064	612203	1.41268e+07	1.36362e+07	2.66439e+06	1.33821e+07	3.75645e+06	1.1793e+07	2.92119e+07	2.79952e+07	3.19684e+07	2.89839e+07	6.8767e+06	2.57495e+07	1.77909e+07	2.08837e+07	2.25465e+07	1.77889e+07	1.92462e+07	2.71743e+07	2.40667e+07	2.32334e+07	1.90001e+07	2.07413e+07	2.39095e+07
594	M109T34	109.022	33.9623	0.57	7.66416e+07	8.04845e+07	9.33379e+07	6.89594e+07	7.41125e+07	9.47719e+07	9.57535e+07	7.63336e+07	8.39643e+07	9.4889e+07	7.22855e+07	8.08675e+07	7.5415e+07	8.82939e+07	7.43006e+07	9.65444e+07	8.30924e+07	8.89888e+07	8.10147e+07	7.94461e+07	9.24277e+07	9.15704e+07	9.45405e+07	9.14686e+07	9.69729e+07	9.19305e+07	9.09522e+07	1.04332e+08	7.55572e+07
595	M109T838	109.022	837.93	13.97	1.93192e+07	3.70645e+06	2.80465e+06	3.05541e+06	1.4485e+07	3.72449e+06	1.25609e+07	1.78557e+07	3.42073e+06	4.77784e+06	4.59234e+07	3.86792e+06	4.10977e+06	1.42821e+07	1.48363e+07	8.55405e+07	2.22091e+07	1.64219e+07	4.05367e+06	2.62977e+06	3.44656e+06	1.89883e+07	1.62484e+07	2.08517e+07	4.46573e+06	1.85462e+07	2.28815e+07	1.69304e+07	1.18565e+07
596	M109T828	109.022	827.852	13.8	2.55413e+07	5.38581e+07	2.64721e+07	7.51287e+07	3.2607e+07	9.28539e+06	3.27301e+07	3.1812e+07	9.66008e+06	7.52204e+06	9.29844e+06	4.13839e+07	1.08343e+07	5.02695e+07	2.25705e+07	1.06721e+07	3.65441e+07	3.57177e+07	9.30116e+07	9.23391e+06	8.43169e+06	2.95354e+07	2.90563e+07	3.49189e+07	2.28364e+07	2.63963e+07	3.25289e+07	3.37905e+07	2.97035e+07
597	M109T95	109.028	95.068	1.58	1.4881e+09	1.52662e+09	1.58008e+09	1.54596e+09	1.33794e+09	1.58055e+09	1.3315e+09	1.41219e+09	1.24358e+09	1.3848e+09	1.71114e+09	1.22432e+09	1.37807e+09	2.63889e+09	1.24531e+09	1.44321e+09	1.30525e+09	1.32112e+09	1.31558e+09	1.23204e+09	1.37144e+09	2.97287e+09	1.70037e+09	1.64793e+09	1.31994e+09	1.43492e+09	3.05591e+09	1.27423e+09	1.36802e+09
598	M109T77	109.028	76.5392	1.28	8.8672e+08	4.07912e+08	7.07906e+08	3.92985e+08	7.58713e+08	4.20106e+08	8.29473e+08	6.46154e+08	6.87799e+08	4.66023e+08	6.16099e+08	4.44147e+08	6.04334e+08	1.70415e+08	4.69379e+08	1.84287e+08	4.799e+08	9.64687e+08	1.04957e+09	7.40167e+08	8.32047e+08	1.17842e+09	9.35748e+08	8.21921e+08	2.43322e+08	8.36457e+08	9.17509e+08	7.88298e+08	6.12659e+08
599	M109T102	109.028	102.471	1.71	1.34858e+09	1.37419e+09	1.34449e+09	1.28082e+09	1.59333e+09	1.33293e+09	1.36172e+09	1.26447e+09	1.07213e+09	1.1659e+09	1.00245e+09	1.29134e+09	1.17526e+09	2.7338e+08	1.59852e+09	3.23677e+08	1.26515e+09	1.27068e+09	1.68417e+09	1.7625e+09	1.19705e+09	3.14255e+08	2.99578e+08	3.12704e+08	1.30738e+09	1.30253e+09	2.94532e+08	1.50503e+09	1.27242e+09
600	M109T770	109.022	769.774	12.83	1.85234e+07	4.88587e+07	7.96298e+07	2.5939e+08	8.36824e+07	5.84333e+07	1.61203e+07	7.63524e+07	1.8184e+07	1.76915e+07	1.83463e+07	1.9915e+07	5.91417e+07	3.20836e+07	4.45497e+07	4.45291e+07	7.22161e+07	1.41218e+08	2.9428e+08	1.84736e+07	1.59616e+07	2.22722e+08	1.79802e+08	5.62286e+07	3.27904e+08	5.05786e+07	2.83452e+08	6.51738e+07	8.96427e+07
601	M109T123	109.028	123.385	2.06	6.11582e+08	2.43502e+08	1.23337e+09	2.07837e+09	1.86076e+09	9.73372e+08	6.02141e+08	2.56523e+08	2.56134e+08	7.50397e+08	2.57107e+08	7.06966e+08	8.49757e+08	9.60934e+08	2.95025e+08	2.06199e+09	1.2421e+09	2.10232e+09	1.20073e+09	1.09931e+09	1.08749e+09	9.40061e+08	9.29318e+08	1.04548e+09	2.4058e+08	9.71492e+08	6.74379e+08	7.13695e+08	7.69922e+08
602	M109T815	109.022	815.262	13.59	8.49803e+06	3.76616e+07	2.18656e+07	8.84864e+06	3.84517e+07	3.72201e+07	3.37362e+07	8.32066e+06	7.87819e+06	7.69888e+06	5.18529e+07	8.31864e+06	8.13997e+06	8.97003e+06	5.81551e+07	8.61243e+06	2.89754e+07	3.11524e+07	9.69679e+06	9.65804e+06	9.45876e+06	2.63791e+07	2.75612e+07	3.44179e+07	9.52688e+06	7.89803e+06	2.78345e+07	2.23562e+07	2.19747e+07
603	M109T783	109.022	782.793	13.05	1.99717e+08	7.28307e+07	9.02984e+07	1.98476e+07	5.3702e+07	1.60029e+07	4.29072e+07	1.54657e+07	1.79666e+07	1.86905e+07	1.45243e+08	1.88643e+07	1.78712e+07	5.44223e+07	1.01385e+08	2.29898e+07	5.69677e+07	6.00944e+07	2.00218e+07	1.58217e+07	2.1703e+08	1.65318e+07	6.09124e+07	8.49986e+07	1.81947e+07	7.06507e+07	1.70434e+07	5.93081e+07	6.05686e+07
604	M109T36	109.042	35.6445	0.59	3.3816e+07	4.95683e+06	4.86012e+06	2.8781e+07	4.12429e+06	4.06732e+06	4.15743e+07	4.93387e+06	3.40829e+07	4.60012e+06	3.00335e+07	4.6352e+06	3.41689e+07	4.2953e+07	5.20567e+06	4.83865e+07	5.09879e+07	5.87817e+06	4.90596e+07	6.09775e+06	7.04884e+06	6.18642e+06	5.24808e+07	5.47377e+06	4.53002e+06	7.17609e+06	5.83286e+06	4.88753e+06	4.45984e+07
605	M109T809	109.101	808.51	13.48	7.25658e+07	5.67288e+07	6.67665e+07	6.92055e+07	6.29115e+07	7.87669e+07	9.54336e+07	8.18256e+07	9.41788e+07	1.69872e+08	7.90403e+07	1.01936e+08	7.36587e+07	4.29512e+07	1.07257e+08	4.84798e+07	4.07997e+07	5.53775e+07	5.65084e+07	4.79317e+07	3.47053e+07	6.0029e+07	5.54119e+07	5.05612e+07	5.75809e+07	6.24141e+07	7.73955e+07	7.40122e+07	7.79644e+07
606	M109T836	109.101	835.51	13.93	2.38833e+07	1.5823e+07	2.01948e+07	1.26161e+07	1.82374e+07	1.00896e+07	1.14295e+07	1.21877e+07	1.07225e+07	3.45657e+07	2.34003e+07	2.6217e+07	2.26592e+07	1.22303e+07	1.2777e+07	3.4068e+07	7.21006e+06	3.68797e+06	1.57927e+07	6.89068e+06	3.35153e+06	1.40774e+07	1.23228e+07	9.61502e+06	3.9611e+06	3.37084e+06	1.45345e+07	1.49936e+07	1.331e+07
607	M109T822	109.101	821.774	13.7	3.87162e+07	3.24925e+07	4.13972e+07	2.99075e+07	3.47151e+07	3.07219e+07	3.67773e+07	3.85264e+07	3.80342e+07	4.80787e+07	3.48265e+07	4.81537e+07	2.74108e+07	2.33815e+07	2.94319e+07	6.48669e+06	1.7775e+07	6.10449e+06	2.65775e+07	1.86514e+07	5.55201e+06	2.9394e+07	3.21672e+07	6.80945e+06	7.48031e+06	8.63808e+06	2.99914e+07	4.55476e+07	2.67928e+07
608	M109T708	109.101	708.304	11.81	5.84065e+07	4.6294e+07	5.89624e+07	5.93542e+07	5.72093e+07	5.80087e+07	2.30466e+07	1.71247e+07	4.07721e+06	3.99658e+07	1.42693e+07	1.75403e+07	2.76916e+07	3.49332e+06	4.49158e+06	1.69402e+07	1.25448e+07	1.50342e+07	7.3121e+06	3.64094e+06	4.41928e+06	2.72869e+07	2.32536e+07	2.38454e+07	3.10845e+07	2.03655e+07	3.83089e+07	3.21392e+07	2.96717e+07
609	M109T533	109.101	532.952	8.88	4.0766e+07	3.27517e+07	2.98466e+07	2.68556e+07	3.11127e+07	3.49369e+07	6.31099e+06	5.63295e+06	2.45519e+07	2.60657e+07	2.57808e+07	2.78649e+07	1.74251e+07	4.52312e+07	5.11562e+06	4.96088e+06	4.58445e+06	5.2132e+06	4.53337e+06	2.15659e+07	2.12366e+07	2.25312e+07	1.91652e+07	2.43061e+07	2.97472e+07	5.79118e+06	4.02153e+07	2.42645e+07	2.65287e+07
610	M109T631	109.101	630.833	10.51	3.45515e+07	9.03286e+06	5.33489e+07	3.82744e+07	9.75511e+06	1.03123e+07	3.71001e+07	9.02642e+06	7.88558e+06	9.20857e+06	3.83074e+07	4.6838e+07	3.21488e+07	4.06783e+07	9.47771e+06	2.47176e+07	7.44734e+06	6.86311e+06	2.73065e+07	3.11737e+07	7.01643e+06	8.44167e+06	3.14506e+07	2.34668e+07	3.1877e+07	8.06461e+06	8.29993e+06	3.56381e+07	3.64164e+07
611	M109T555	109.101	555.055	9.25	3.71029e+07	3.82866e+07	4.07294e+07	3.35242e+07	3.58959e+07	3.61943e+07	1.01615e+07	3.78027e+07	3.77554e+07	8.99285e+06	3.67598e+07	3.55324e+07	3.59382e+07	3.54706e+07	4.22611e+07	3.6563e+07	7.04997e+06	3.16913e+07	4.82824e+07	2.2334e+07	7.71258e+06	3.54239e+07	3.02529e+07	4.43245e+07	4.13784e+07	4.37632e+07	2.95892e+07	4.96211e+07	9.10435e+06
612	M109T776	109.101	776.024	12.93	6.57251e+07	1.84501e+07	5.05442e+07	1.15041e+08	9.34183e+07	9.37787e+07	6.8308e+07	2.41428e+08	8.6064e+07	7.21113e+07	3.55698e+07	1.72163e+08	1.25591e+08	3.06891e+07	1.46496e+07	7.46945e+07	4.15156e+07	1.26366e+07	2.87395e+07	2.53948e+07	2.30159e+07	3.80924e+07	2.1782e+07	6.58848e+07	7.83163e+06	3.69632e+07	1.49312e+08	4.69718e+08	1.28713e+08
613	M109T456	109.101	456.391	7.61	1.45467e+07	2.094e+07	2.85589e+07	4.07467e+06	1.55337e+07	4.06174e+06	4.51734e+06	1.59717e+07	4.24287e+06	3.20429e+06	1.81749e+07	1.38621e+07	1.3139e+07	1.82215e+07	1.88863e+07	3.93608e+06	1.15433e+07	1.76732e+07	2.28656e+07	2.26941e+07	1.65829e+07	2.29156e+07	4.03357e+06	4.26195e+06	3.97392e+06	3.6706e+06	1.96874e+07	3.86425e+06	3.35947e+06
614	M109T749	109.101	748.753	12.48	4.14508e+07	5.90039e+07	1.21128e+07	4.55857e+07	2.48087e+07	2.92082e+07	7.09981e+06	7.25602e+06	5.38615e+06	2.13814e+07	6.52366e+06	2.74716e+07	5.29e+06	1.31231e+07	5.16987e+06	2.63581e+07	4.79045e+06	2.34216e+07	1.82672e+07	4.30278e+06	2.28141e+07	5.46403e+06	2.19601e+07	2.22673e+07	4.40081e+07	2.20851e+07	5.99432e+06	3.2453e+07	2.66694e+07
615	M110T33	109.521	32.9023	0.55	7.52219e+07	8.08527e+07	1.00566e+08	8.08268e+07	8.77889e+07	9.26223e+07	9.45444e+07	8.73881e+07	1.02575e+08	1.11412e+08	8.59934e+07	8.65193e+07	6.19567e+07	9.05595e+07	6.78309e+07	9.87042e+07	7.65849e+07	9.10942e+07	8.15814e+07	8.25138e+07	8.81565e+07	9.59779e+07	9.35516e+07	8.89538e+07	1.25279e+08	8.3832e+07	8.70232e+07	9.35365e+07	7.80013e+07
616	M110T77	109.522	77.3275	1.29	4.7435e+06	1.9999e+07	7.27846e+06	2.49581e+07	1.43748e+07	5.32629e+06	2.91681e+07	4.0266e+07	3.55372e+07	4.38159e+07	4.79446e+07	4.56631e+07	5.86271e+07	7.47786e+07	4.50113e+07	4.72659e+07	5.4977e+07	4.4652e+07	3.91605e+07	4.52145e+07	4.62183e+07	2.98861e+07	2.2861e+07	5.48965e+06	4.44255e+07	2.81964e+07	4.07819e+07	2.58869e+07	3.23477e+07
617	M110T777	109.522	777.394	12.96	5.24978e+07	9.78199e+07	4.67582e+07	3.32843e+08	5.32713e+07	5.887e+07	1.72223e+07	1.72391e+07	2.82164e+07	1.37754e+08	1.7011e+07	4.7493e+07	5.33384e+07	5.55425e+07	2.06496e+07	2.00334e+07	1.71981e+07	1.88022e+07	7.21306e+07	3.90693e+07	3.99127e+07	2.80979e+08	6.77824e+07	9.01645e+07	1.70849e+07	2.53275e+08	1.71303e+07	2.86463e+08	8.84131e+07
618	M110T826	109.522	826.057	13.77	4.91557e+07	1.68648e+07	5.33509e+07	1.80987e+07	1.70636e+07	6.68349e+07	8.99125e+07	4.22263e+07	3.99423e+07	1.9294e+07	2.04731e+07	1.68302e+07	5.91662e+07	1.88543e+07	2.8539e+07	1.45112e+08	5.26534e+07	1.24395e+08	6.92765e+07	2.10455e+07	1.93794e+07	5.6976e+07	1.12446e+08	2.13742e+07	1.92614e+07	1.55658e+07	1.88859e+07	1.68709e+07	1.29394e+08
619	M110T833	109.522	833.421	13.89	9.98187e+06	4.32826e+07	9.95874e+06	1.07988e+07	5.52366e+07	1.0968e+07	8.30008e+06	3.24354e+07	3.98984e+07	5.82377e+07	1.08426e+07	7.73297e+07	2.63295e+07	1.43448e+08	2.38113e+07	1.29777e+07	1.21372e+07	1.07477e+07	3.98567e+07	4.11694e+07	1.38961e+08	2.49637e+07	1.14165e+07	5.54216e+07	1.21497e+08	9.86638e+06	3.28807e+07	8.11521e+07	1.19242e+07
620	M110T759	109.522	759.113	12.65	3.06201e+07	2.10063e+07	6.25184e+07	1.00552e+07	3.41395e+07	1.22856e+07	1.27265e+07	3.17938e+07	3.63045e+07	8.26447e+06	1.03174e+07	2.97186e+07	7.70113e+07	7.17939e+07	1.19868e+08	5.60951e+07	9.45583e+07	1.05282e+08	3.18043e+07	6.26437e+07	2.23672e+07	1.00427e+07	3.20931e+07	4.31117e+07	1.05812e+07	8.87096e+06	1.38711e+07	9.88042e+06	6.19553e+07
621	M110T744	109.522	743.754	12.4	2.84392e+07	7.05755e+06	3.17705e+07	8.09888e+06	2.12759e+07	5.36241e+07	7.40489e+06	7.80881e+06	2.86375e+07	7.33708e+06	7.85097e+06	1.89047e+07	4.71862e+07	2.36945e+07	9.37198e+06	5.12931e+07	7.93186e+06	2.06304e+07	3.54182e+07	4.30081e+07	7.14971e+06	2.16637e+07	2.28489e+07	2.53331e+07	7.57574e+06	6.91895e+06	8.14387e+06	2.60113e+07	3.25965e+07
622	M110T76_1	110.009	76.4401	1.27	9.93847e+09	1.06108e+10	1.05549e+10	1.05401e+10	1.13955e+10	1.1028e+10	1.20919e+10	1.23218e+10	1.19221e+10	1.17289e+10	1.11041e+10	1.17327e+10	1.00798e+10	1.05003e+10	1.07131e+10	1.06329e+10	1.04831e+10	1.04265e+10	1.24168e+10	1.24862e+10	1.23436e+10	1.29207e+10	1.20792e+10	1.34094e+10	1.16945e+10	1.12394e+10	1.20703e+10	1.20975e+10	1.1585e+10
623	M110T50	110.009	50.4698	0.84	2.54562e+07	3.1752e+07	1.38281e+07	3.35813e+07	3.58255e+07	1.03786e+08	2.74484e+07	3.53286e+07	1.00258e+08	3.21121e+07	1.0196e+08	3.34406e+07	2.26652e+07	3.76617e+07	4.02372e+07	2.38518e+07	3.20208e+07	3.0769e+07	4.24024e+07	3.60027e+07	3.49894e+07	9.75203e+07	3.4261e+07	1.02763e+08	4.46386e+07	4.47433e+07	9.92121e+07	4.10134e+07	4.31423e+07
624	M110T142	110.009	142.433	2.37	2.91361e+07	3.86189e+07	1.27721e+07	3.5455e+07	3.64578e+07	1.19801e+07	3.21138e+07	1.42963e+07	1.37555e+07	4.5429e+07	2.49757e+07	3.7964e+07	3.13486e+07	1.4499e+07	2.45976e+07	1.50662e+07	2.80781e+07	1.73052e+07	2.73791e+07	3.00723e+07	2.52112e+07	6.99944e+07	1.71354e+07	2.32192e+07	3.09165e+07	3.11402e+07	1.36237e+07	3.06954e+07	1.60663e+07
625	M110T61	110.009	61.0155	1.02	8.76031e+07	1.00237e+08	8.81242e+07	8.58563e+07	8.28539e+07	2.90426e+07	6.23796e+07	7.24227e+07	2.72656e+07	9.45894e+07	4.77162e+08	7.3793e+07	7.14876e+07	6.78111e+07	8.24372e+07	5.77794e+07	1.18598e+08	8.10215e+07	5.66506e+07	2.87025e+07	6.87972e+07	2.98303e+07	6.74559e+07	2.76698e+07	8.26969e+07	3.07728e+07	3.25596e+07	6.53609e+07	6.19132e+07
626	M110T690	110.019	689.997	11.5	1.60486e+08	1.25639e+08	3.08952e+08	1.28639e+08	1.82119e+08	1.36852e+08	3.35381e+07	3.35139e+07	1.48632e+08	3.54237e+07	1.19758e+08	1.9294e+08	4.03939e+07	7.36442e+07	3.55705e+07	3.44893e+07	9.7926e+07	3.67379e+07	3.8955e+07	3.69359e+07	8.42609e+07	1.32308e+07	3.30669e+08	1.33621e+08	3.96247e+08	2.69795e+07	2.0567e+08	3.25636e+07	3.35486e+07
627	M110T34	110.02	33.9623	0.57	1.27986e+09	1.28118e+09	1.49393e+09	1.13497e+09	1.24812e+09	1.52294e+09	1.55425e+09	1.30248e+09	1.45575e+09	1.56802e+09	1.23055e+09	1.39046e+09	1.22637e+09	1.42041e+09	1.26088e+09	1.54994e+09	1.31765e+09	1.42209e+09	1.36679e+09	1.34508e+09	1.51493e+09	1.54668e+09	1.62697e+09	1.4773e+09	1.60859e+09	1.46265e+09	1.54058e+09	1.67525e+09	1.1858e+09
628	M110T68	110.02	68.3646	1.14	1.25459e+08	4.82234e+07	7.88892e+07	3.27869e+08	3.22344e+08	4.76795e+07	5.78352e+07	3.31641e+08	1.01709e+08	6.20347e+07	5.65297e+08	3.2434e+08	9.39315e+07	8.51112e+07	3.09081e+08	3.67174e+08	3.24353e+08	5.71784e+07	5.48849e+08	3.17613e+08	3.29719e+08	5.83924e+07	6.64587e+07	7.90187e+07	6.40206e+07	3.35855e+08	6.17145e+07	5.86829e+07	3.2019e+08
629	M110T770	110.019	770.1	12.84	5.0237e+09	4.74538e+09	9.00968e+08	8.22458e+08	3.02026e+09	5.07144e+09	7.68163e+08	4.67588e+09	3.32523e+09	4.61706e+09	1.87849e+09	4.64403e+09	8.23735e+08	4.33105e+09	4.77653e+09	3.3491e+09	4.35183e+09	8.29958e+08	4.39745e+09	6.89034e+08	4.24335e+09	1.01165e+09	4.76068e+09	4.74681e+09	5.16657e+09	8.47045e+08	7.1689e+08	5.07681e+09	4.79771e+09
630	M110T828	110.019	827.965	13.8	7.48547e+08	6.67165e+08	1.5867e+09	1.4782e+09	1.27589e+09	3.34936e+08	4.07041e+08	8.39008e+08	4.72446e+08	6.39442e+08	1.45582e+09	6.56332e+08	5.78608e+08	7.5273e+08	5.39259e+08	1.53109e+09	4.63469e+08	3.58216e+08	8.24051e+08	8.19367e+08	5.15766e+08	1.34232e+09	6.90205e+08	7.39508e+08	4.30718e+08	4.04611e+08	4.56014e+08	4.85196e+08	4.0617e+08
631	M110T94	110.032	94.4558	1.57	9.82999e+07	9.79148e+07	9.82135e+07	8.6299e+07	1.13647e+08	9.38859e+07	7.01155e+07	8.65948e+07	5.8295e+07	1.40598e+08	8.11347e+07	9.35129e+07	7.74208e+07	1.24065e+08	7.80995e+07	7.31737e+07	7.84861e+07	8.57368e+07	1.78797e+07	1.044e+08	1.60358e+07	6.66757e+07	1.05433e+08	1.85026e+07	7.39562e+07	6.72186e+07	7.70401e+07	7.29596e+07	9.47319e+07
632	M110T76_2	110.033	76.3716	1.27	2.88941e+07	1.55346e+07	2.40575e+07	2.31848e+07	2.83855e+09	4.90913e+07	3.53222e+07	2.74263e+07	2.93337e+09	2.89186e+09	3.48015e+07	3.09521e+07	3.80349e+07	1.83731e+07	1.99458e+07	6.3152e+07	2.95175e+07	6.96193e+07	3.06835e+09	6.01162e+07	9.63067e+07	3.89203e+07	5.48895e+07	3.38999e+09	1.70881e+07	5.32031e+07	4.28968e+07	2.74879e+07	2.92898e+09
633	M110T103	110.032	103.439	1.72	7.91607e+07	8.66256e+07	2.0966e+07	8.19102e+07	1.01328e+08	8.66785e+07	2.00686e+07	7.98571e+07	7.93261e+07	2.00635e+07	2.27762e+07	6.80521e+07	1.0592e+08	4.70588e+07	6.80125e+07	9.25127e+07	1.25925e+08	1.08096e+08	1.09358e+08	1.13099e+08	8.07902e+07	8.04823e+07	2.40133e+07	3.52406e+08	4.87418e+07	7.13696e+07	6.38135e+07	8.81794e+07	9.11644e+07
634	M110T39	110.059	39.0121	0.65	2.33987e+08	2.76322e+08	6.96467e+08	7.32655e+08	1.45219e+08	1.27269e+09	7.95848e+08	4.68022e+08	4.56585e+08	4.80566e+08	6.95291e+08	1.60903e+08	1.46227e+08	1.44539e+08	5.97799e+08	1.40474e+08	5.53352e+08	1.33526e+09	5.07093e+08	5.25634e+08	1.42933e+08	1.56053e+08	1.44457e+08	7.60914e+08	2.22852e+07	2.35149e+08	7.25158e+07	2.55079e+08	8.992e+08
635	M110T450	110.071	450.398	7.51	5.86391e+07	5.76396e+07	6.78042e+07	4.86068e+07	2.6257e+07	5.54272e+07	2.84196e+07	6.72817e+07	6.19746e+07	5.76864e+07	2.28447e+07	6.43804e+07	6.50359e+07	5.50547e+07	5.6469e+07	5.80787e+07	4.86808e+07	5.97097e+07	3.68216e+07	4.64513e+07	4.61297e+07	3.74163e+07	2.76989e+07	3.64482e+07	1.12524e+07	2.30857e+07	5.39429e+07	5.23909e+07	2.78265e+07
636	M111T34_1	110.522	33.9623	0.57	1.11718e+08	1.08999e+08	1.24125e+08	1.00207e+08	1.04062e+08	1.26854e+08	1.309e+08	1.12199e+08	1.27292e+08	1.36932e+08	1.11344e+08	1.22752e+08	1.00509e+08	1.20335e+08	1.19037e+08	1.30538e+08	1.16763e+08	1.20601e+08	1.1767e+08	1.16645e+08	1.30122e+08	1.36496e+08	1.36817e+08	1.2714e+08	1.37469e+08	1.24513e+08	1.35617e+08	1.42688e+08	1.07907e+08
637	M111T834	110.522	833.84	13.9	3.5242e+07	1.21356e+08	1.50033e+07	1.10914e+08	4.57637e+07	1.66198e+07	2.61156e+07	2.81211e+07	3.84131e+07	5.88601e+07	1.23113e+08	1.20717e+08	6.56194e+06	1.69531e+07	2.46555e+07	4.92532e+07	3.12991e+07	2.2752e+07	1.05649e+07	3.64311e+07	2.85827e+07	5.04048e+07	8.25226e+07	1.03027e+07	3.38852e+07	2.73383e+07	3.00798e+07	4.53148e+07	3.84136e+07
638	M111T774_1	110.522	774.137	12.9	4.25345e+08	8.93557e+07	7.55108e+07	4.25782e+08	6.64537e+07	8.42164e+07	8.23083e+07	7.70783e+07	9.42639e+07	2.10923e+07	9.31184e+07	2.3181e+08	3.27213e+07	5.81425e+07	6.70057e+07	4.01286e+07	3.52677e+08	1.36161e+08	4.26468e+08	3.48557e+07	1.03848e+08	2.10377e+08	1.90673e+08	4.26888e+08	4.20866e+08	6.3226e+07	6.54189e+07	4.01254e+08	8.609e+07
639	M111T822	110.522	821.763	13.7	4.50518e+07	1.05179e+07	8.3885e+07	1.03391e+07	4.97457e+07	4.87797e+07	9.76386e+06	3.64709e+07	9.57222e+06	3.45353e+07	1.14064e+07	9.82174e+06	6.65849e+07	5.11642e+07	9.87536e+06	9.15799e+06	3.7924e+07	7.91475e+07	1.41123e+08	3.57614e+07	3.49498e+07	9.87974e+06	8.31527e+06	8.41015e+07	3.9347e+07	9.40364e+06	5.94769e+07	3.4757e+07	4.94665e+07
640	M111T796_1	110.522	796.442	13.27	1.68013e+07	9.56171e+07	8.14453e+07	1.62428e+07	8.45045e+07	8.63657e+07	4.02094e+07	6.83538e+07	5.13247e+07	5.87005e+07	4.16274e+07	9.50531e+07	1.58338e+07	4.97514e+07	1.04199e+08	8.28549e+07	1.53499e+07	1.49243e+08	2.09824e+07	1.64169e+07	1.50588e+07	6.30724e+07	1.61558e+07	1.94074e+07	1.8299e+07	7.82708e+07	5.78085e+07	1.69121e+07	7.22448e+07
641	M111T759	110.522	758.707	12.65	1.56471e+07	6.14597e+07	7.39986e+07	1.66568e+07	6.61691e+07	6.16395e+07	9.59402e+07	4.94662e+07	1.36072e+08	8.60535e+07	2.30564e+07	1.63316e+07	4.20389e+08	1.87736e+07	8.69128e+07	3.94726e+07	1.70138e+07	6.20339e+07	1.75237e+07	4.07364e+08	1.70996e+07	1.16559e+07	1.56892e+07	1.59729e+07	1.69441e+07	7.33486e+07	1.18211e+08	1.54191e+07	9.43153e+07
642	M111T66	110.528	65.9527	1.1	2.34686e+07	2.84245e+07	8.10307e+06	3.18806e+07	8.99457e+06	1.67046e+07	3.12788e+07	4.78405e+06	2.30891e+07	1.64754e+07	1.15452e+07	5.00855e+06	3.19762e+07	2.49216e+07	3.2982e+07	4.29144e+06	2.64227e+07	4.98204e+06	1.99642e+07	8.24696e+06	3.21771e+07	4.21605e+06	1.3655e+07	5.60836e+06	1.28863e+07	5.10068e+06	6.96281e+06	2.47252e+07	3.02773e+07
643	M111T50	110.528	49.6439	0.83	3.70724e+07	1.53041e+07	5.34148e+06	1.38105e+07	4.54516e+06	1.29191e+07	2.01584e+07	8.34662e+06	8.82879e+06	1.22138e+07	3.33161e+07	9.26394e+06	3.93884e+06	3.969e+06	3.63687e+06	2.84419e+07	1.27515e+07	8.00874e+06	1.47989e+07	1.31834e+07	3.43552e+06	8.5432e+06	3.43408e+06	1.9037e+07	8.40248e+06	7.57576e+06	4.3364e+06	2.26338e+07	2.99814e+06
644	M111T164	111.007	163.813	2.73	3.61132e+08	4.39606e+08	4.06332e+08	3.99947e+08	5.29145e+08	3.6515e+08	3.42568e+08	2.71713e+08	5.43079e+08	3.05927e+08	2.99233e+08	2.61401e+08	2.15585e+08	1.99793e+08	2.17468e+08	2.79877e+08	2.48003e+08	2.46584e+08	2.99051e+08	2.43188e+08	2.26445e+08	2.42208e+08	2.85025e+08	2.59257e+08	3.12979e+08	2.69898e+08	3.09294e+08	2.78097e+08	3.0205e+08
645	M111T134	111.008	134.25	2.24	2.1661e+08	2.4003e+08	2.83031e+08	2.06374e+08	9.82069e+07	1.92121e+08	2.36201e+08	9.73125e+07	5.87469e+07	1.93723e+08	2.04614e+08	1.15871e+08	6.03072e+07	7.06254e+07	1.0574e+08	1.19713e+08	5.37581e+07	7.16934e+07	1.64028e+08	1.43157e+08	1.32146e+08	1.01262e+08	1.55394e+08	9.97443e+07	2.10844e+08	1.72847e+08	2.1319e+08	1.44777e+08	1.07028e+08
646	M111T186	111.008	185.887	3.1	3.53009e+07	2.49404e+07	1.00491e+07	2.63042e+07	7.06099e+07	6.79785e+07	9.42535e+07	9.2859e+07	8.80524e+07	9.38072e+07	9.22983e+07	1.00947e+08	2.64276e+07	2.88616e+07	1.07025e+08	3.47367e+07	1.13354e+08	2.69693e+07	2.19146e+07	2.60693e+07	2.29792e+07	9.12447e+06	1.26166e+08	2.38149e+07	4.14118e+07	2.31106e+07	4.53134e+07	1.03911e+08	1.07915e+08
647	M111T76	111.009	76.4401	1.27	1.24392e+09	1.33336e+09	1.27913e+09	1.51743e+09	1.40121e+09	1.3742e+09	1.7504e+09	1.51692e+09	1.43752e+09	1.56912e+09	1.33574e+09	1.45661e+09	1.22333e+09	1.31964e+09	1.33818e+09	1.33579e+09	1.53078e+09	1.31196e+09	1.54668e+09	1.55953e+09	1.87226e+09	1.63956e+09	1.51169e+09	1.68039e+09	1.49092e+09	1.39338e+09	1.53526e+09	1.49601e+09	1.71842e+09
648	M111T204	111.008	204.24	3.4	4.32403e+06	7.62996e+06	1.99376e+06	1.62915e+06	5.8647e+06	4.16449e+06	2.29718e+07	6.00675e+07	4.29745e+06	6.8646e+06	5.64674e+06	6.51073e+07	1.38126e+07	1.40431e+07	3.99898e+07	1.51811e+07	3.54493e+07	1.50763e+07	1.23768e+07	1.57868e+07	1.52199e+07	1.49733e+07	7.82655e+07	1.43262e+07	1.36681e+07	5.50774e+07	1.06207e+07	2.28894e+07	3.77031e+07
649	M111T34_2	111.02	33.9339	0.57	6.17125e+08	5.81905e+08	7.23861e+08	6.53011e+08	5.93479e+08	7.07932e+08	6.0886e+08	5.90613e+08	7.30236e+08	6.54939e+08	6.90326e+08	6.47784e+08	4.28515e+08	5.76294e+08	3.86761e+08	6.96985e+08	5.19902e+08	6.83577e+08	5.52449e+08	7.15755e+08	7.04889e+08	7.33132e+08	6.78255e+08	7.3628e+08	6.84927e+08	6.79526e+08	5.54058e+08	6.40273e+08	6.69385e+08
650	M111T828	111.02	827.965	13.8	8.82492e+09	1.06831e+10	7.96608e+09	6.37699e+09	7.05927e+09	7.06471e+09	6.36723e+09	5.51533e+09	6.31194e+09	6.3346e+09	7.56872e+09	6.06437e+09	7.35039e+09	9.35174e+09	7.26633e+09	1.12536e+10	1.07924e+10	2.35913e+10	1.15392e+10	1.79801e+09	1.00173e+10	2.03251e+09	7.67768e+09	7.98042e+09	8.6597e+09	7.52767e+09	2.65492e+09	5.01082e+09	8.00131e+09
651	M111T713	111.02	712.848	11.88	1.72819e+08	6.61193e+08	1.97419e+09	1.66119e+08	8.08395e+08	2.12989e+08	1.17331e+09	1.85215e+08	9.44482e+08	6.87504e+08	2.22941e+09	7.4223e+08	2.4176e+08	8.98923e+08	1.13616e+09	1.86143e+08	1.55778e+08	5.37545e+08	8.06151e+08	1.09813e+09	1.54762e+08	7.66581e+08	6.2736e+08	1.75393e+08	1.58921e+08	1.40292e+08	1.76292e+09	1.86451e+08	1.88426e+08
652	M111T735	111.02	735.209	12.25	1.81753e+09	1.24878e+09	2.3167e+09	1.29269e+09	3.47205e+09	1.2292e+09	3.45203e+08	8.91061e+08	4.11585e+09	7.87291e+08	3.1871e+08	2.80739e+08	3.70729e+08	1.65791e+09	2.67663e+09	3.17206e+08	1.13401e+09	3.44997e+08	2.74778e+08	4.31122e+08	9.28603e+08	1.17639e+09	9.24979e+08	3.20779e+08	8.50655e+08	2.73325e+09	2.78192e+09	3.04474e+08	1.04748e+09
653	M111T744	111.02	744.375	12.41	1.63894e+09	2.16488e+09	5.408e+08	1.98091e+09	5.41034e+08	1.4372e+09	3.30453e+09	1.35261e+09	6.13276e+08	1.80468e+09	1.89596e+09	2.72061e+09	5.3997e+08	5.09515e+08	4.96983e+08	3.04668e+09	1.9168e+09	5.27958e+08	2.85508e+09	6.68252e+08	2.13031e+09	4.32684e+08	1.1765e+09	4.87702e+08	1.40151e+09	4.36297e+08	5.21363e+08	2.31126e+09	1.61884e+09
654	M111T796_2	111.02	796.163	13.27	2.70773e+09	1.26748e+09	1.27522e+09	6.48174e+09	3.06247e+09	6.57608e+09	3.6982e+09	8.17732e+09	6.60243e+09	7.33955e+09	1.29236e+09	7.99187e+09	1.21505e+09	1.2271e+09	1.06446e+09	2.78453e+09	1.18051e+09	1.34917e+09	1.34752e+09	1.23519e+09	2.8659e+09	1.23169e+09	4.98551e+09	1.28991e+09	2.32105e+09	1.73354e+09	2.6624e+09	9.65451e+09	3.95973e+09
655	M111T774_2	111.02	774.396	12.91	2.87966e+09	6.58411e+09	1.09187e+09	5.72058e+09	6.94972e+09	2.59187e+09	2.66366e+09	1.43067e+09	1.05521e+09	3.86299e+09	9.97033e+08	3.91783e+09	1.70467e+10	1.10758e+09	1.05591e+09	3.04681e+09	3.5044e+09	1.01119e+09	2.29852e+09	1.11793e+09	9.80325e+08	9.32024e+08	9.41685e+08	1.0214e+09	4.69545e+09	6.98692e+09	1.00725e+09	9.90572e+08	9.78524e+08
656	M111T758	111.02	758.199	12.64	1.34721e+09	4.83998e+08	5.46307e+08	2.46002e+09	5.55532e+08	1.81629e+09	2.55765e+09	1.99327e+09	2.3074e+09	2.36901e+09	1.36643e+09	2.46765e+09	5.66258e+08	3.00424e+09	6.48327e+09	4.76154e+08	1.6113e+09	5.04279e+08	2.44609e+09	6.77564e+08	1.81864e+09	4.5695e+08	1.52894e+09	4.98728e+08	2.33201e+09	4.40376e+08	6.28166e+08	4.62253e+08	4.92577e+08
657	M111T506	111.039	506.046	8.43	2.55837e+08	2.49098e+08	2.56641e+08	2.56163e+08	2.43774e+08	2.54867e+08	3.83636e+08	5.71366e+07	2.63299e+08	1.54779e+08	2.7439e+08	2.26495e+08	3.4684e+08	2.85598e+08	2.66884e+08	4.37981e+08	3.22224e+08	6.03185e+07	1.47587e+08	2.54717e+08	1.9603e+08	3.50718e+08	5.82892e+07	2.51151e+08	5.91215e+07	1.3929e+08	5.63451e+07	3.60604e+08	2.95694e+08
658	M111T531	111.039	531.156	8.85	2.74179e+08	1.97185e+08	2.05062e+08	4.9067e+07	5.26397e+07	4.94688e+07	1.84044e+08	1.04815e+09	1.6332e+08	9.16325e+08	4.19051e+08	2.46567e+08	3.37238e+08	5.09424e+07	4.38943e+08	2.73473e+08	4.89534e+07	4.58286e+07	2.39156e+08	2.31509e+08	2.08772e+08	1.18564e+08	1.14545e+09	1.72141e+08	8.65978e+08	2.18665e+08	1.10526e+09	2.4423e+08	2.03716e+08
659	M111T592	111.039	592.336	9.87	5.20038e+07	5.25729e+07	2.40045e+08	2.16993e+08	5.21758e+07	2.73904e+08	2.65712e+08	2.39309e+08	5.73819e+07	5.34269e+07	2.13549e+08	1.59508e+08	2.11445e+08	2.10315e+08	1.65914e+08	2.16266e+08	2.9743e+08	4.6749e+07	4.98125e+07	5.3777e+07	5.00976e+07	1.55961e+08	4.87626e+07	3.09219e+08	3.54287e+08	5.79749e+07	2.36486e+08	5.37712e+07	1.87226e+08
660	M111T551	111.039	551.052	9.18	2.40482e+08	1.92648e+08	3.44192e+08	4.63575e+07	4.40928e+07	5.09981e+07	1.73118e+08	5.24424e+07	2.2183e+08	4.42997e+07	1.72801e+08	2.13281e+08	3.54968e+08	5.01949e+07	1.85e+08	2.28701e+08	5.67778e+07	1.66575e+08	5.15401e+07	2.64046e+08	4.22887e+07	2.28083e+08	5.16805e+07	2.1003e+08	4.51556e+07	2.3708e+08	4.81676e+07	2.33127e+08	1.70613e+08
661	M111T583	111.039	582.913	9.72	3.86292e+08	7.65977e+08	6.36492e+07	1.82037e+08	1.582e+08	5.26514e+07	6.00686e+07	2.94292e+08	6.14399e+07	6.03141e+07	6.10196e+07	5.73545e+07	5.96722e+08	5.56357e+07	1.82301e+08	2.28608e+08	1.9404e+08	3.23176e+08	1.75415e+08	5.53208e+07	9.77368e+08	1.81796e+08	2.08967e+08	2.592e+08	5.87372e+07	6.33369e+07	1.83194e+08	5.4447e+07	5.32849e+07
662	M111T568	111.039	568.208	9.47	2.09131e+08	6.00413e+07	4.57677e+08	4.35947e+08	2.60117e+08	6.33338e+07	2.27121e+08	2.9242e+08	3.03489e+08	6.16664e+07	3.2073e+08	2.87392e+08	6.74733e+07	4.69603e+08	2.07744e+08	3.32546e+08	6.82604e+07	2.18833e+08	1.79821e+08	1.98101e+08	5.67594e+07	2.07149e+08	2.16139e+08	2.91416e+08	6.63844e+07	6.68245e+07	1.86214e+08	2.00293e+08	6.58527e+07
663	M111T661	111.039	661.429	11.02	3.33841e+08	2.15743e+08	2.09334e+09	8.99991e+07	9.77984e+07	1.79735e+09	1.99519e+08	2.10366e+08	1.02661e+08	8.19987e+07	1.90698e+09	2.05247e+08	4.5851e+08	8.28707e+08	1.40863e+09	9.2366e+07	8.97617e+07	9.27789e+07	2.73927e+08	1.95406e+08	1.35325e+09	3.19991e+08	9.07898e+07	8.63329e+07	3.6294e+08	1.35957e+08	1.05306e+08	2.09853e+08	9.75907e+07
664	M111T689	111.039	689.428	11.49	2.46625e+08	2.48948e+08	1.22122e+08	1.144e+08	1.89553e+08	1.1614e+08	1.95416e+08	4.08763e+08	1.30803e+08	4.45753e+08	1.10971e+08	1.34261e+08	1.20705e+08	1.06778e+08	1.29968e+08	1.1615e+08	1.06446e+08	1.09962e+08	7.01844e+08	3.62656e+08	5.00223e+07	7.51006e+07	1.18971e+08	1.72965e+08	1.38297e+08	2.49271e+08	1.41977e+08	1.10244e+08	1.56905e+08
665	M111T468	111.039	468.1	7.8	3.1381e+08	4.27919e+08	1.12926e+08	3.02648e+08	4.46615e+08	4.37094e+08	9.2633e+07	5.21354e+08	4.88226e+08	1.87728e+08	1.62695e+08	7.43599e+07	5.50615e+08	1.30692e+08	5.00913e+08	4.91942e+08	3.22475e+08	8.90105e+07	8.72059e+07	2.07039e+08	8.20665e+07	1.39616e+08	8.76758e+07	7.88135e+07	9.2934e+07	4.28884e+08	1.55172e+08	8.5698e+07	8.67564e+07
666	M111T640	111.039	640.288	10.67	1.85693e+08	5.98131e+07	5.74847e+07	5.86487e+07	3.01166e+08	5.63994e+07	2.94109e+08	5.43064e+08	2.14884e+08	3.39037e+08	5.12322e+07	4.05712e+08	1.97591e+08	5.10086e+07	4.65635e+07	2.48437e+08	5.53696e+07	2.18843e+08	5.14947e+07	2.17205e+08	5.33601e+07	4.79488e+08	5.43592e+07	1.889e+08	1.68909e+08	5.01685e+08	2.39994e+08	1.82682e+08	2.1242e+08
667	M111T671	111.039	671.352	11.19	9.5436e+07	2.0448e+08	1.00906e+08	1.51012e+09	1.83078e+08	1.04193e+08	1.98642e+08	9.64787e+07	8.04819e+08	9.14508e+07	9.03739e+07	9.41173e+07	1.03136e+08	7.76962e+07	1.05675e+08	2.96062e+08	8.13077e+07	5.41461e+08	9.80248e+07	1.84125e+08	8.77348e+07	7.31243e+07	1.3566e+09	4.68278e+08	8.60582e+07	1.70822e+08	3.58935e+08	1.80349e+08	6.32968e+08
668	M111T35	111.039	35.1271	0.59	1.69184e+08	1.59588e+08	1.6615e+08	1.99114e+08	1.65927e+08	1.76381e+08	1.65201e+08	1.75014e+08	1.88982e+08	1.66803e+08	1.56944e+08	4.45024e+08	1.58411e+08	2.14249e+08	1.54646e+08	1.98955e+08	1.92292e+08	1.78e+08	1.64383e+08	1.66551e+08	1.54413e+08	1.99869e+08	2.05249e+08	2.01155e+08	1.84385e+08	1.6729e+08	1.89461e+08	2.08993e+08	1.61045e+08
669	M111T102	111.044	102.468	1.71	4.254e+08	5.01137e+08	4.45004e+08	3.99322e+08	5.33552e+08	4.27561e+08	6.78065e+08	2.03981e+09	2.06137e+09	7.18659e+08	9.29306e+08	2.05856e+09	2.39003e+09	7.18335e+08	7.8931e+08	7.76774e+08	6.27375e+08	2.31663e+09	2.53726e+09	1.03169e+09	7.3329e+08	2.52185e+09	8.05449e+08	9.36836e+08	8.23032e+08	7.57207e+08	8.12428e+08	2.01639e+09	7.03783e+08
670	M111T444	111.039	444.149	7.4	1.28782e+08	1.41804e+08	1.51109e+08	1.34944e+08	8.09062e+07	2.60377e+08	1.62337e+07	1.2879e+08	1.02372e+08	3.07636e+07	1.36575e+08	7.45407e+07	1.5092e+08	1.01593e+08	3.43641e+07	1.34379e+08	1.60934e+08	1.38777e+08	3.6289e+07	9.15255e+07	1.06453e+08	1.47906e+08	2.12714e+07	8.87692e+07	1.92055e+07	1.93766e+07	1.31034e+08	1.24126e+08	1.92584e+07
671	M111T606	111.039	605.701	10.1	3.04636e+08	3.40246e+08	6.44978e+07	2.9866e+08	3.13762e+08	2.21567e+08	2.91537e+08	1.86805e+08	6.98366e+08	1.56174e+08	3.75914e+08	2.73425e+08	2.4313e+08	5.4381e+07	2.34274e+08	4.22911e+08	2.31542e+08	3.74527e+08	2.41272e+08	2.84166e+08	5.13843e+07	1.63584e+08	3.05669e+08	5.00143e+07	2.22401e+08	2.30498e+08	2.33325e+08	2.75954e+08	2.43448e+08
672	M111T93	111.055	93.2862	1.55	1.90502e+08	1.93782e+08	2.02829e+08	2.01714e+08	3.46265e+07	2.1231e+08	5.50581e+08	2.62026e+08	2.23609e+08	5.95475e+08	2.74938e+08	4.03432e+08	2.2513e+08	2.94032e+08	2.24244e+08	2.2771e+08	1.95272e+08	1.77923e+08	2.01023e+08	4.56409e+08	2.21173e+08	2.72887e+08	1.92184e+08	6.41699e+08	2.55459e+08	6.27639e+08	2.12463e+08	2.21239e+08	5.81488e+08
673	M111T103	111.055	102.755	1.71	5.26598e+08	1.69347e+08	4.9779e+08	2.1155e+08	5.06603e+08	4.90645e+08	3.48031e+08	2.87887e+08	2.55769e+08	2.33586e+08	2.63346e+08	4.71048e+08	1.63945e+08	2.03541e+08	2.16459e+08	1.98841e+08	1.7054e+08	2.06204e+08	1.83338e+08	4.4899e+07	1.53053e+08	3.55982e+07	1.73166e+08	1.47893e+08	2.00308e+08	2.13256e+08	2.68921e+08	1.99438e+08	1.79461e+08
674	M111T39	111.063	38.5319	0.64	8.79837e+06	1.73186e+07	8.67529e+06	2.14836e+07	9.94233e+06	9.99633e+06	2.19041e+07	5.48244e+07	4.77172e+07	2.89501e+07	8.63221e+06	3.84533e+07	2.01843e+07	1.04935e+07	3.47946e+07	1.24376e+07	9.05257e+06	8.5891e+06	2.76241e+07	8.75904e+06	2.04179e+07	9.0007e+06	9.00692e+06	7.92035e+06	5.83808e+06	7.54959e+06	7.19627e+06	3.23173e+07	8.7946e+06
675	M111T349	111.08	349.209	5.82	2.3108e+07	7.84695e+06	5.9004e+06	9.13932e+06	8.16519e+06	9.46293e+06	6.57778e+06	1.00181e+07	5.46127e+06	8.44132e+06	6.17061e+06	9.4206e+06	1.89541e+07	1.72756e+07	1.87989e+07	1.50193e+07	1.64472e+07	1.81185e+07	1.45144e+07	1.9892e+07	1.92202e+07	1.31608e+07	1.55791e+07	1.83752e+07	9.80804e+06	1.28919e+07	1.32563e+07	1.70328e+07	1.17567e+07
676	M111T441	111.08	441.176	7.35	1.75577e+07	1.80853e+07	1.7948e+07	1.63257e+07	2.15024e+07	1.92875e+07	2.34156e+06	1.64291e+07	1.32767e+07	1.43222e+07	1.18084e+07	1.60464e+07	1.33224e+07	1.23521e+07	1.31833e+07	1.20199e+07	1.39064e+07	1.33951e+07	1.72892e+07	1.89398e+07	1.61188e+07	1.54908e+07	1.15692e+06	1.4161e+07	1.69023e+06	2.94691e+06	1.33994e+07	1.87528e+07	3.27852e+06
677	M111T40	111.08	40.0719	0.67	7.13795e+06	8.94126e+06	3.94998e+07	6.41454e+06	8.63477e+06	8.26091e+06	7.77175e+06	9.84107e+06	8.79696e+06	8.77454e+06	1.60084e+07	8.75284e+06	9.36504e+06	8.22145e+06	7.66943e+06	1.12909e+07	1.28346e+07	1.41303e+07	9.86046e+06	8.98147e+06	7.9712e+06	2.54864e+07	1.53609e+07	1.37006e+07	4.93607e+06	4.75508e+06	1.36754e+07	9.99634e+06	7.91827e+06
678	M111T67	111.08	67.4965	1.12	5.49211e+06	1.79231e+07	5.62365e+06	1.39805e+07	4.65735e+06	4.76402e+06	3.66342e+06	1.51174e+07	5.46e+06	5.4343e+06	1.66427e+07	5.79356e+06	5.48545e+06	5.36873e+06	5.10614e+06	4.41243e+06	1.09015e+07	1.06451e+07	1.78915e+07	7.18063e+06	4.74532e+06	8.49215e+06	5.47104e+06	6.15763e+06	5.57759e+06	6.68184e+06	1.74309e+07	6.52955e+06	4.48327e+06
679	M111T835	111.117	835.3	13.92	3.01377e+07	2.87186e+07	3.426e+07	2.97956e+07	3.07142e+07	3.14383e+07	3.25781e+07	2.94909e+07	3.6205e+07	2.95689e+07	3.92372e+07	2.96453e+07	3.10824e+07	3.09634e+07	3.32539e+07	2.82834e+07	3.47635e+07	3.4543e+07	2.94068e+07	3.60957e+07	3.33208e+07	3.58381e+07	3.72961e+07	3.13132e+07	3.19732e+07	3.0446e+07	3.067e+07	2.90462e+07	3.51146e+07
680	M111T825	111.117	825.254	13.75	1.92726e+07	2.1661e+07	1.97693e+07	1.81841e+07	1.68292e+07	2.05171e+07	1.96978e+07	2.16613e+07	1.81628e+07	2.20978e+07	2.09714e+07	2.12378e+07	2.20309e+07	2.13422e+07	2.34856e+07	1.88488e+07	2.09726e+07	1.82692e+07	2.27892e+07	2.36748e+07	1.94013e+07	1.83951e+07	2.05486e+07	2.10048e+07	1.82353e+07	2.33317e+07	2.0159e+07	5.10679e+06	2.08512e+07
681	M111T32	111.117	31.8845	0.53	2.94138e+06	3.55109e+06	4.96106e+06	6.54964e+06	2.96226e+06	3.42914e+06	7.01972e+06	3.14753e+06	2.91524e+06	3.41e+06	3.06109e+06	3.83046e+06	2.40561e+06	2.26735e+06	2.82923e+06	5.35977e+06	5.51756e+06	7.24074e+06	4.48584e+06	4.906e+06	1.75174e+06	4.29975e+06	4.22605e+06	4.62781e+06	6.01105e+06	2.26625e+06	6.61412e+06	4.43917e+06	3.53718e+06
682	M111T493	111.117	492.774	8.21	1.16155e+07	1.55058e+07	3.20167e+07	1.46744e+07	1.08405e+07	9.5304e+06	4.21923e+06	1.49384e+07	1.67304e+07	1.13147e+07	4.05886e+06	5.09724e+06	1.07328e+07	1.36422e+07	1.41803e+07	1.65996e+07	1.11944e+07	1.69481e+07	1.51214e+07	1.63103e+07	1.43472e+07	1.30411e+07	3.4278e+06	1.08683e+07	3.44594e+06	3.9537e+06	4.86914e+06	1.07672e+07	3.78252e+06
683	M111T61	111.117	61.2607	1.02	9.69535e+06	9.17741e+06	2.73867e+07	9.18842e+06	9.60869e+06	1.08191e+07	9.99524e+06	1.11981e+07	1.10842e+07	9.93138e+06	1.0756e+07	1.86529e+07	1.18151e+07	1.05521e+07	2.5118e+07	7.27956e+06	8.62812e+06	1.70493e+07	6.22135e+06	9.04081e+06	8.7842e+06	1.24407e+07	2.06786e+07	5.59361e+06	6.85048e+06	9.08758e+06	5.53524e+06	1.29117e+07	8.67416e+06
684	M112T33	111.522	32.9291	0.55	4.95964e+07	5.01814e+07	5.25352e+07	4.17093e+07	4.9697e+07	4.7984e+07	4.80765e+07	5.14523e+07	6.2732e+07	5.57131e+07	4.85687e+07	5.39266e+07	4.32551e+07	5.43018e+07	3.28158e+07	4.97142e+07	4.9987e+07	5.89021e+07	5.17116e+07	4.41109e+07	4.72316e+07	5.16952e+07	5.77939e+07	5.70386e+07	5.88714e+07	5.47747e+07	4.71943e+07	5.68419e+07	4.46542e+07
685	M112T798_1	111.522	798.047	13.3	5.06042e+08	1.75581e+09	2.8978e+08	2.14368e+09	9.35023e+07	4.06559e+08	3.28335e+08	3.47869e+08	4.93312e+08	3.01483e+08	4.09955e+08	9.61068e+07	1.03686e+08	3.71215e+08	9.5485e+07	1.03596e+08	3.55521e+08	1.01619e+08	1.02512e+08	9.45871e+07	2.73654e+08	2.68243e+08	9.91685e+07	2.63527e+08	3.72934e+08	9.40995e+07	2.25369e+08	3.71865e+08	4.9488e+08
686	M112T831	111.522	830.676	13.84	8.23724e+07	7.4092e+07	1.37032e+08	7.20811e+07	7.33165e+07	3.49952e+08	7.71889e+07	2.12103e+08	4.98887e+08	2.34192e+08	8.22619e+07	5.11515e+08	8.45782e+07	2.86754e+08	8.5512e+07	9.18571e+07	7.19675e+08	1.01165e+08	8.69525e+07	8.35687e+07	4.43715e+08	7.24147e+07	8.19076e+07	7.65729e+08	3.03397e+08	8.02966e+07	6.64072e+08	2.0372e+08	2.4844e+08
687	M112T724	111.522	723.832	12.06	7.71012e+07	1.53237e+07	5.48591e+07	1.72133e+07	9.26641e+07	1.53765e+08	9.28339e+07	1.8895e+07	2.25363e+07	1.06351e+08	2.82271e+07	1.65392e+07	2.15149e+07	8.82385e+07	1.85814e+07	1.86542e+07	1.70884e+07	1.98981e+07	1.87963e+07	2.41354e+07	1.37689e+07	1.34854e+07	3.17368e+07	1.74461e+07	6.18552e+07	6.82831e+07	8.71971e+07	3.98367e+07	1.84005e+07
688	M112T774	111.522	773.674	12.89	4.82764e+08	7.63956e+07	1.72935e+08	7.54863e+07	8.63589e+07	4.62592e+08	3.68855e+08	8.03554e+07	2.74924e+08	2.07592e+08	1.89449e+08	6.50019e+07	2.15559e+09	2.14675e+08	1.77071e+09	1.91371e+08	4.91721e+08	8.9018e+07	9.33083e+07	2.09791e+09	1.84118e+08	8.06401e+07	7.60488e+07	2.37292e+08	5.70429e+08	7.86788e+07	7.04035e+08	4.53492e+08	3.51891e+08
689	M112T176	111.531	176.33	2.94	1.84522e+06	2.17098e+06	7.07595e+06	7.87522e+06	2.10935e+06	8.60346e+06	1.38983e+07	1.48542e+07	8.63158e+06	9.85679e+06	9.78604e+06	1.59879e+07	1.09068e+07	1.03868e+07	1.15372e+07	1.18921e+07	2.96614e+06	8.19485e+06	8.43487e+06	7.51946e+06	9.7732e+06	2.43801e+06	1.10406e+07	6.47839e+06	2.41824e+06	1.01098e+07	7.9775e+06	9.30897e+06	8.61537e+06
690	M112T743	111.522	743.126	12.39	1.72826e+08	4.1515e+07	1.22052e+08	4.00214e+07	4.94754e+07	2.27321e+08	2.96025e+08	3.94604e+07	5.03248e+07	1.25161e+08	2.60296e+08	1.73454e+08	4.78114e+07	1.10626e+08	4.60651e+07	1.81551e+08	1.56677e+08	4.0456e+07	9.67217e+07	5.00925e+07	1.32633e+08	9.83402e+07	1.07934e+08	1.36901e+08	3.87444e+07	3.71538e+07	4.72796e+07	4.30726e+07	1.39578e+08
691	M112T36	111.541	36.2187	0.6	1.65883e+07	1.50936e+07	1.67461e+07	1.62778e+07	1.3685e+07	1.86702e+07	1.36004e+07	1.17581e+07	1.83594e+07	1.87282e+07	1.25567e+07	1.63358e+07	1.38327e+07	1.45383e+07	1.28138e+07	1.49744e+07	1.41381e+07	1.4936e+07	1.75389e+07	1.07804e+07	1.68203e+07	1.68087e+07	1.26422e+07	1.7104e+07	1.48171e+07	1.69676e+07	1.40254e+07	1.23684e+07	1.3995e+07
692	M112T34_1	111.968	33.9734	0.57	1.22608e+07	1.12588e+07	1.13447e+07	1.05892e+07	6.36849e+07	1.04883e+07	5.88776e+07	1.1101e+07	1.06701e+07	1.09591e+07	1.04324e+07	1.22439e+07	4.31367e+07	1.04999e+07	1.14691e+07	5.91669e+07	1.03667e+07	1.24743e+07	6.62559e+07	1.10571e+07	1.23233e+07	1.14557e+07	1.09903e+07	7.42337e+07	1.3365e+07	1.26911e+07	1.06288e+07	9.59177e+06	1.08407e+07
693	M112T68_1	111.968	68.151	1.14	3.64768e+07	1.02962e+07	2.18783e+07	1.04157e+07	5.40978e+07	2.40703e+07	3.45915e+07	3.67184e+07	1.61273e+07	8.91068e+06	1.64027e+07	2.3173e+07	2.68376e+07	2.4701e+07	2.07425e+07	2.53746e+07	2.20298e+07	2.73996e+07	3.64125e+07	1.17458e+07	1.72086e+07	2.69907e+07	3.0343e+07	7.00563e+07	2.17508e+07	1.67179e+07	3.54233e+07	1.12193e+07	1.11169e+07
694	M112T46	111.968	46.4295	0.77	1.87e+07	7.14721e+06	6.9962e+06	2.6508e+07	6.92432e+06	2.10059e+07	7.36065e+06	6.49223e+06	2.53202e+07	1.65243e+07	1.27679e+07	1.51398e+07	8.24502e+06	1.90525e+07	1.58399e+07	7.56068e+06	1.58799e+07	8.77234e+06	6.88658e+06	8.43377e+06	2.14302e+07	1.69144e+07	7.61308e+06	7.28162e+06	1.7373e+07	5.651e+06	6.28281e+06	1.53326e+07	1.13757e+07
695	M112T60	111.968	59.5224	0.99	3.23177e+07	2.88056e+07	1.73787e+07	1.92696e+07	4.46636e+07	3.80255e+07	5.81152e+07	3.08561e+07	2.08653e+07	4.60104e+07	1.11291e+07	4.24484e+07	5.03728e+07	3.04538e+07	3.91069e+07	5.76889e+07	1.92959e+07	3.9627e+07	6.22826e+07	1.49601e+07	1.07193e+07	1.54586e+07	3.29406e+07	5.85464e+07	1.679e+07	1.65741e+07	3.09849e+07	1.5225e+07	9.40786e+06
696	M112T35	111.984	35.0928	0.58	7.02126e+06	8.18454e+06	7.3126e+06	8.06799e+06	6.23967e+06	6.45992e+06	7.73084e+06	5.61116e+06	7.02796e+06	6.74369e+06	9.94472e+06	7.62917e+06	6.93089e+06	5.75065e+06	8.2571e+06	6.41986e+07	5.92005e+06	6.90844e+06	7.66381e+06	7.59387e+06	9.23431e+06	8.07093e+06	6.36602e+06	7.67689e+06	1.06283e+07	6.0865e+06	6.19803e+06	6.77593e+06	6.76368e+06
697	M112T76	112.006	76.4063	1.27	1.32803e+09	1.49803e+09	1.43291e+09	1.44642e+09	1.49389e+09	1.49136e+09	1.60959e+09	1.71208e+09	1.65001e+09	1.59786e+09	1.51324e+09	1.60067e+09	1.36181e+09	1.45544e+09	1.49335e+09	1.43323e+09	1.43072e+09	1.42927e+09	1.71686e+09	1.71763e+09	1.71958e+09	1.80313e+09	1.68601e+09	1.83973e+09	1.57352e+09	1.54843e+09	1.6095e+09	1.6366e+09	1.639e+09
698	M112T164	112.011	163.737	2.73	1.89384e+07	2.04251e+07	1.88371e+07	1.84356e+07	2.10428e+07	1.02298e+07	1.43835e+07	1.3267e+07	1.79303e+07	1.34229e+07	1.34854e+07	1.25715e+07	8.76499e+06	9.4764e+06	9.72266e+06	1.56303e+07	1.02099e+07	1.22706e+07	1.21151e+07	9.79941e+06	9.40912e+06	1.37372e+07	1.30002e+07	1.01923e+07	1.42121e+07	9.93969e+06	1.74779e+07	1.19077e+07	9.64416e+06
699	M112T268	112.01	268.033	4.47	2.92664e+07	1.84103e+07	2.16368e+07	3.35292e+07	2.3753e+07	3.6143e+07	1.28554e+07	1.88917e+07	3.50142e+07	4.08918e+07	3.48955e+07	4.26837e+07	1.76048e+07	2.07571e+07	2.8382e+07	3.21018e+07	2.26916e+07	9.38324e+06	2.19107e+07	1.18021e+07	3.48694e+07	2.7304e+07	1.3444e+07	1.33233e+07	1.92142e+07	3.34796e+07	1.94457e+07	1.94456e+07	1.92602e+07
700	M112T34_2	112.018	33.9327	0.57	2.46599e+08	2.48384e+08	2.45262e+08	2.52872e+08	2.28809e+08	2.72322e+08	2.55625e+08	2.37233e+08	3.17648e+08	2.67612e+08	2.78389e+08	2.10643e+08	1.8323e+08	2.27061e+08	1.52183e+08	2.60438e+08	2.46179e+08	2.65665e+08	2.41924e+08	2.17142e+08	2.25874e+08	2.98291e+08	2.79729e+08	3.05562e+08	3.27863e+08	2.78144e+08	2.13669e+08	2.56276e+08	2.03448e+08
701	M112T68_2	112.018	68.151	1.14	2.35069e+07	2.16323e+07	3.91648e+06	2.62917e+07	4.43273e+06	4.11702e+06	7.98475e+06	3.50692e+06	7.70434e+06	3.4703e+07	6.17692e+06	5.46431e+06	7.22346e+06	3.89997e+06	5.70965e+06	9.00083e+06	9.4005e+06	3.75236e+06	3.7326e+06	4.63016e+06	8.26929e+06	5.72034e+06	3.16694e+07	7.36042e+06	2.28696e+07	1.69972e+07	9.35186e+06	5.4272e+06	5.51353e+06
702	M112T828	112.018	827.56	13.79	2.70473e+09	2.77185e+09	3.27379e+09	2.45571e+09	2.06768e+09	2.74537e+09	8.57921e+08	1.0136e+09	2.22358e+09	2.41815e+09	2.97617e+09	2.47569e+09	3.27325e+09	6.78215e+08	2.72227e+09	3.30381e+09	3.28269e+09	3.78999e+09	3.24272e+09	3.56532e+09	3.28163e+09	9.68492e+08	3.03277e+09	3.20086e+09	2.53567e+09	7.43818e+08	1.03275e+09	2.48367e+09	7.34677e+08
703	M112T741	112.018	740.51	12.34	4.24553e+08	7.05089e+08	5.70929e+08	5.32013e+08	1.32678e+09	1.43005e+09	4.58675e+08	6.04232e+08	7.18529e+08	6.96108e+08	1.13177e+09	5.06256e+08	4.5035e+08	2.26895e+08	2.19261e+08	2.14191e+08	6.86172e+08	5.46442e+08	2.22163e+08	8.70075e+08	7.45078e+08	1.0255e+09	1.27231e+09	1.04056e+09	3.34821e+08	1.05048e+09	7.44626e+08	8.51136e+08	2.23322e+08
704	M112T769	112.018	769.393	12.82	1.42441e+09	3.65908e+08	1.25076e+09	9.94535e+08	3.65089e+08	2.43038e+09	3.79398e+08	3.42956e+08	2.69881e+09	8.14493e+08	1.50427e+09	1.31391e+09	2.90422e+09	3.76991e+08	5.14809e+09	3.44637e+08	9.09889e+08	3.91846e+08	3.52247e+08	1.74803e+09	1.43129e+09	1.28544e+09	8.64123e+08	8.08128e+08	3.42802e+08	2.68799e+09	2.60697e+09	1.15338e+09	3.4569e+08
705	M112T717	112.017	716.739	11.95	5.92261e+08	6.76378e+08	4.3508e+08	9.48935e+07	3.80464e+08	4.42309e+08	1.14999e+08	2.28548e+08	1.24459e+08	8.85621e+07	7.75684e+08	7.07239e+08	5.4224e+08	3.12761e+08	1.20178e+08	6.38059e+08	8.89065e+07	1.14796e+08	3.15011e+08	1.37536e+08	8.68696e+07	7.67187e+07	1.00056e+08	9.87496e+07	2.98751e+08	1.97792e+08	1.16782e+08	6.78305e+08	1.02278e+08
706	M112T798_2	112.018	797.663	13.29	1.87692e+09	1.18387e+09	3.81461e+08	2.40702e+09	4.0382e+08	1.71112e+09	3.5816e+08	1.59786e+09	2.27462e+09	1.45043e+09	1.46131e+09	1.85444e+09	3.87891e+08	3.94676e+08	3.78881e+08	4.3822e+08	1.98009e+09	4.04772e+08	4.39757e+08	3.92026e+08	1.26604e+09	1.59399e+09	1.94463e+09	4.53661e+08	3.79845e+08	2.87889e+09	1.48111e+09	1.41144e+09	4.21891e+08
707	M112T788	112.018	788.224	13.14	2.95267e+08	8.94717e+08	1.02368e+09	3.318e+08	3.2618e+09	3.35075e+08	5.67501e+09	3.13829e+08	3.39635e+08	1.2337e+09	8.84696e+08	1.06685e+09	1.35851e+09	3.11562e+08	3.4016e+08	9.9515e+08	3.36355e+08	8.78453e+08	5.87151e+09	1.74499e+09	1.41309e+09	8.3444e+08	1.19238e+09	3.75846e+09	5.18369e+09	2.93299e+08	1.12332e+09	1.02442e+09	9.68879e+09
708	M112T779	112.018	778.686	12.98	8.22924e+08	1.80316e+09	2.62443e+08	1.526e+09	2.49093e+09	3.04174e+08	2.32264e+08	3.03903e+09	2.63182e+08	9.12785e+08	1.42927e+09	8.00496e+08	1.07781e+09	8.63725e+09	2.73226e+08	3.52225e+09	1.48332e+09	2.83614e+09	2.96432e+08	3.32773e+08	2.7252e+08	8.77865e+08	1.06319e+09	2.87188e+08	2.38328e+08	2.50096e+08	2.60352e+08	1.27084e+09	2.77476e+08
709	M112T56	112.018	55.5476	0.93	4.35658e+06	4.13868e+06	7.82737e+06	3.6322e+06	4.2236e+06	7.37358e+06	1.02837e+07	6.45092e+06	7.96438e+06	4.35846e+06	4.20854e+06	8.10527e+06	4.53921e+06	7.65397e+06	4.89233e+06	8.15365e+06	1.01985e+07	5.05952e+06	9.46811e+06	9.2325e+06	4.71367e+06	6.05187e+06	4.89609e+06	5.85637e+06	3.56384e+06	9.3549e+06	4.76766e+07	7.2619e+06	9.07401e+06
710	M112T174	112.023	173.509	2.89	1.62761e+07	2.26678e+07	1.08691e+07	1.73489e+07	1.7071e+07	2.29539e+07	1.14283e+07	1.4777e+07	1.45951e+07	1.57435e+07	8.28565e+06	1.73866e+07	2.55573e+07	3.81445e+07	1.74256e+07	3.17032e+07	3.38166e+07	2.44051e+07	1.97055e+07	3.05476e+07	1.17435e+07	3.51966e+07	3.91271e+07	3.93782e+07	1.73337e+07	1.92778e+07	1.91908e+07	1.79697e+07	2.48694e+07
711	M112T104_1	112.039	104.16	1.74	2.93227e+07	1.57951e+08	4.80494e+07	1.77317e+08	7.31024e+07	6.18152e+07	5.52348e+07	6.48566e+07	6.54791e+07	1.45109e+08	5.04359e+07	1.31319e+08	5.0887e+07	3.64863e+07	3.22464e+07	5.71216e+07	3.09692e+07	3.59487e+07	2.48787e+07	3.46202e+07	2.46458e+07	5.01913e+07	2.25822e+07	6.32313e+07	4.61536e+07	2.82583e+07	9.03017e+07	4.52772e+07	3.91651e+07
712	M112T93	112.039	93.1519	1.55	3.86491e+07	8.06148e+06	2.91028e+07	7.61564e+06	1.03857e+07	2.7395e+07	5.18545e+07	7.76908e+07	5.52107e+07	4.62021e+07	1.70847e+08	8.25079e+07	8.17685e+07	7.03392e+07	6.67964e+07	5.58859e+07	4.8192e+07	5.31876e+07	5.66366e+07	5.41388e+07	7.32371e+07	4.8198e+07	5.63851e+07	5.48913e+07	9.64238e+07	8.47584e+07	6.65615e+07	1.09454e+08	9.48354e+07
713	M112T67	112.047	66.9189	1.12	1.09115e+07	1.69018e+07	7.57487e+06	4.37604e+07	1.19616e+07	1.27077e+07	1.60891e+07	3.5727e+07	7.90702e+06	8.28714e+07	8.41936e+07	1.61681e+07	2.52723e+07	2.41272e+07	1.05703e+07	2.28652e+07	9.07243e+06	2.58384e+07	1.32672e+07	2.56685e+07	7.51631e+06	3.1397e+07	8.00498e+06	6.88678e+07	1.6522e+07	1.35989e+07	9.20636e+06	1.65968e+07	2.60362e+07
714	M112T232	112.039	231.626	3.86	4.96139e+06	5.04378e+06	5.32076e+06	1.33696e+07	5.01626e+06	5.97976e+06	6.06481e+06	8.48688e+06	5.83359e+06	5.64059e+06	2.19856e+07	2.15257e+07	2.17101e+07	1.52914e+07	1.67064e+07	1.666e+07	2.97916e+07	6.37395e+07	3.03648e+07	6.94039e+06	5.19366e+07	2.46062e+07	6.58461e+06	7.33193e+06	5.24336e+06	5.91081e+06	2.64227e+07	1.95346e+07	1.89879e+07
715	M112T41	112.047	41.3505	0.69	1.70287e+07	5.39929e+06	8.06152e+06	8.52574e+06	9.67649e+06	4.36324e+07	2.12982e+07	6.72925e+07	1.97548e+07	2.02198e+07	6.51301e+07	1.33218e+07	5.45967e+07	4.35404e+06	1.13805e+07	5.57927e+06	6.58932e+07	4.45809e+07	1.05405e+07	7.6583e+07	8.03502e+07	8.15851e+07	1.61231e+07	7.89118e+07	1.03562e+07	7.18942e+07	1.86048e+07	4.79158e+06	2.71391e+07
716	M112T103_1	112.05	102.81	1.71	4.04828e+08	3.66999e+08	4.25085e+08	3.79962e+08	4.35743e+08	4.08543e+08	3.51616e+08	4.33736e+08	2.59898e+08	3.12751e+08	3.20526e+08	5.31331e+08	2.11217e+08	2.44559e+08	2.03645e+08	1.7472e+08	2.07007e+08	1.61477e+08	1.58117e+08	1.87374e+08	1.64587e+08	1.95921e+08	1.31268e+08	1.6347e+08	2.78172e+08	2.78445e+08	2.45716e+08	2.98222e+08	3.02287e+08
717	M112T147_1	112.051	146.953	2.45	1.16079e+08	9.68466e+07	1.24592e+08	1.16017e+08	1.27014e+08	1.20827e+08	8.62323e+07	9.266e+07	7.09487e+07	8.22874e+07	8.72303e+07	1.48704e+08	6.09862e+07	7.67308e+07	5.76993e+07	5.50136e+07	5.82914e+07	5.45805e+07	5.03744e+07	6.7708e+07	6.24056e+07	6.1399e+07	4.47272e+07	5.92533e+07	8.28009e+07	7.90075e+07	7.69532e+07	8.51365e+07	7.42694e+07
718	M112T104_2	112.076	103.511	1.73	1.20571e+08	1.11705e+08	2.47752e+08	1.70652e+08	2.0605e+08	1.19303e+08	9.78227e+07	1.37758e+08	1.6281e+08	3.1293e+08	6.19678e+07	2.85536e+08	2.08115e+08	2.28235e+08	3.04092e+08	3.78528e+08	2.92823e+08	3.18805e+08	1.61515e+08	3.815e+08	2.81704e+08	2.41772e+08	2.67212e+08	2.54619e+08	2.2836e+08	1.78082e+08	2.09673e+08	3.46097e+08	1.62953e+08
719	M112T125	112.087	125.24	2.09	2.12993e+07	4.71795e+07	2.0696e+07	4.71025e+07	5.76902e+07	2.10294e+07	4.74267e+07	4.47232e+07	3.12136e+07	2.16928e+07	2.48328e+07	1.81844e+08	5.13942e+07	6.68804e+07	5.55741e+07	4.62427e+07	2.82107e+07	2.73134e+07	2.79703e+07	3.26093e+07	4.46626e+07	8.90778e+07	2.53919e+07	4.57297e+07	5.04444e+07	8.88329e+07	2.73755e+07	3.14817e+07	1.03905e+08
720	M112T103_2	112.087	103.41	1.72	3.26448e+08	3.62107e+08	3.64493e+08	3.42673e+08	3.57888e+08	3.57736e+08	4.57042e+08	4.22828e+08	3.23135e+08	3.71262e+08	3.8037e+08	6.65474e+08	4.54985e+08	4.19258e+08	3.80595e+08	4.24863e+08	4.18638e+08	3.83118e+08	2.93545e+08	3.179e+08	3.33393e+08	3.46418e+08	3.23714e+08	3.34624e+08	3.54817e+08	3.59409e+08	3.5869e+08	3.96162e+08	3.85427e+08
721	M112T147_2	112.087	147.142	2.45	1.66757e+08	1.73066e+08	1.86839e+08	1.64565e+08	1.74579e+08	1.83712e+08	1.74136e+08	1.52471e+08	1.33696e+08	1.50398e+08	1.30039e+08	2.79589e+08	1.91669e+08	1.90889e+08	1.73592e+08	1.8882e+08	1.9053e+08	1.83688e+08	1.53614e+08	1.61394e+08	1.52644e+08	1.67646e+08	1.49356e+08	1.68441e+08	1.88562e+08	1.72177e+08	1.79878e+08	1.78509e+08	1.81852e+08
722	M113T33_1	112.517	32.9633	0.55	3.87633e+06	2.12338e+07	1.34363e+07	4.34252e+06	1.05192e+07	1.83071e+07	8.85353e+06	1.13349e+07	1.44091e+07	1.74448e+07	9.91801e+06	1.79942e+07	1.77774e+07	1.14203e+07	1.56373e+07	1.06962e+07	1.59203e+07	1.30881e+07	2.488e+07	2.07471e+07	9.47669e+06	1.18764e+07	2.3468e+07	1.11557e+07	5.55622e+06	2.04343e+07	2.17801e+07	5.86665e+06	1.58842e+07
723	M113T797	112.519	796.595	13.28	1.63912e+08	2.27146e+08	4.25212e+07	2.09876e+08	6.48479e+08	1.50742e+08	4.09824e+07	4.0143e+07	4.54601e+07	4.54703e+07	4.61523e+07	4.18263e+07	4.46729e+07	1.67157e+08	1.06872e+08	1.64232e+08	2.06638e+08	2.64593e+08	4.80788e+07	4.89281e+07	3.67554e+08	4.30041e+07	4.70785e+07	2.07589e+08	4.47016e+07	5.24021e+08	4.36794e+07	3.61629e+08	1.70598e+08
724	M113T832	112.519	831.78	13.86	2.03615e+08	1.27019e+08	2.10436e+07	1.7962e+07	1.42435e+08	8.73096e+07	7.61699e+07	2.01896e+07	9.76264e+07	9.57913e+07	2.34192e+07	2.10793e+07	1.00404e+08	7.12846e+07	1.2251e+08	7.26461e+07	1.85944e+08	5.58962e+07	2.36817e+07	2.36174e+07	1.98645e+07	1.3471e+08	2.11124e+07	2.19291e+07	2.42735e+07	1.6599e+08	1.82263e+07	8.34087e+07	2.12671e+07
725	M113T786	112.519	786.139	13.1	1.70407e+08	7.5899e+07	2.5717e+08	9.12984e+07	7.78379e+07	1.2716e+08	5.8687e+08	8.0578e+08	5.83147e+08	6.59327e+08	7.8409e+08	3.6575e+08	2.59004e+08	1.14509e+08	1.00306e+08	1.05568e+08	8.50379e+07	1.60848e+08	9.05556e+08	9.105e+08	7.70209e+07	4.05811e+08	6.25874e+08	1.1009e+08	5.68704e+08	7.58792e+07	5.62687e+08	8.44572e+07	2.38418e+08
726	M113T78	112.967	77.5111	1.29	7.82537e+07	7.64944e+07	7.96876e+07	8.09468e+07	1.01134e+08	9.39089e+07	1.18632e+08	1.33423e+08	1.00043e+08	1.12941e+08	1.5184e+08	1.50547e+08	1.56376e+08	1.79367e+08	1.42446e+08	1.41802e+08	1.42858e+08	1.54802e+08	1.19796e+08	1.43874e+08	1.28165e+08	1.54133e+08	9.36434e+07	1.10526e+08	1.23356e+08	1.33437e+08	1.20896e+08	1.16263e+08	1.3096e+08
727	M113T33_2	112.967	32.905	0.55	1.30932e+07	1.28585e+07	1.52372e+07	1.4959e+07	1.07827e+07	1.25462e+07	1.31096e+07	1.69696e+07	1.76062e+07	1.12255e+07	1.08728e+07	1.62717e+07	1.20806e+07	1.20689e+07	1.13884e+07	1.1927e+07	1.41759e+07	1.25448e+07	1.26263e+07	1.48819e+07	1.25029e+07	1.23936e+07	1.40225e+07	1.87618e+07	1.6824e+07	1.41461e+07	1.34178e+07	1.03511e+07	1.7596e+07
728	M113T94_1	113	94.0882	1.57	1.67199e+08	1.54415e+08	1.7506e+08	2.25704e+08	1.86936e+08	1.88905e+08	2.17814e+08	1.84727e+08	1.59005e+08	1.68991e+08	2.45872e+08	5.33475e+08	1.07726e+08	1.87486e+08	1.32805e+08	1.22495e+08	1.12356e+08	9.32588e+07	7.64926e+07	1.02426e+08	9.72998e+07	1.01755e+08	9.051e+07	1.32341e+08	1.60391e+08	1.6412e+08	1.64348e+08	1.88124e+08	1.87353e+08
729	M113T76_1	113.01	76.3603	1.27	3.31871e+07	4.30235e+07	3.46335e+07	3.67457e+07	4.94648e+07	4.55879e+07	4.22095e+07	3.95507e+07	4.4131e+07	3.45068e+07	4.50376e+07	3.94753e+07	4.17385e+07	4.75227e+07	3.52108e+07	3.89799e+07	4.12931e+07	4.34638e+07	4.08042e+07	4.28866e+07	4.26563e+07	4.38739e+07	4.00706e+07	4.45311e+07	3.13359e+07	4.32409e+07	4.24662e+07	4.61823e+07	4.40657e+07
730	M113T33_3	113.017	32.9291	0.55	3.11362e+07	1.68057e+07	3.57904e+07	3.29131e+07	3.42662e+07	1.91913e+07	2.96466e+07	3.60877e+07	4.32762e+07	3.97589e+07	3.09072e+07	3.40818e+07	2.13921e+07	3.35105e+07	2.06365e+07	3.38739e+07	3.17734e+07	3.10908e+07	2.98238e+07	3.18748e+07	3.45794e+07	3.26772e+07	3.87447e+07	3.92875e+07	4.26409e+07	3.95316e+07	3.2789e+07	3.25387e+07	2.67374e+07
731	M113T795	113.016	795.213	13.25	3.79519e+08	1.25564e+09	6.32243e+07	2.11734e+08	1.62687e+08	2.32679e+08	4.17253e+08	6.55814e+07	6.91697e+07	6.60263e+07	1.95309e+08	2.79305e+08	3.16966e+08	3.00688e+08	5.56461e+07	2.02404e+08	1.51772e+08	1.34461e+08	6.67592e+07	2.69276e+08	8.59415e+08	1.86979e+08	7.22948e+07	1.70062e+08	1.94844e+08	4.0155e+08	6.82157e+07	1.62726e+08	2.43578e+08
732	M113T763	113.016	762.768	12.71	3.6507e+08	3.08151e+07	2.40437e+08	8.24497e+07	3.87548e+07	1.5966e+08	1.26929e+08	3.1776e+07	4.43203e+07	3.66898e+07	9.88971e+07	1.76966e+08	4.17783e+07	1.31724e+08	3.7126e+08	2.63803e+08	1.49763e+08	1.93564e+08	3.45414e+07	1.69459e+08	3.33906e+07	1.58098e+08	3.57266e+07	1.12374e+08	1.54499e+08	1.73028e+08	1.35601e+08	1.22683e+08	3.65753e+07
733	M113T829	113.016	828.677	13.81	5.16974e+07	5.43803e+07	4.88071e+07	5.28922e+07	1.02721e+08	4.86186e+07	1.23327e+08	4.93262e+07	1.39041e+08	1.42047e+08	2.99194e+08	3.49165e+08	1.34834e+08	5.09377e+07	1.27912e+08	4.52829e+08	5.46374e+08	1.42252e+08	5.57861e+07	5.23864e+07	1.47428e+08	5.17013e+08	5.49795e+07	1.83007e+08	2.74301e+08	3.14315e+08	4.81975e+07	1.72385e+08	1.29419e+08
734	M113T94_2	113.023	94.261	1.57	8.58256e+07	4.5297e+07	1.21961e+08	5.99421e+07	5.18867e+07	8.03232e+07	1.49882e+08	5.39706e+07	1.64792e+08	5.17812e+07	3.32568e+08	1.35405e+08	1.27167e+08	5.3288e+07	1.46733e+08	1.45309e+08	4.01545e+07	1.28882e+08	9.31986e+07	1.39057e+08	3.43738e+07	1.11218e+08	1.56647e+08	1.07858e+08	5.14852e+07	1.18065e+08	1.30769e+08	5.3952e+07	5.36603e+07
735	M113T105	113.023	104.542	1.74	9.96597e+07	1.58766e+08	5.86544e+07	1.07181e+08	8.21754e+08	1.16797e+08	1.54519e+08	3.33269e+08	7.16812e+07	6.26315e+08	7.64367e+07	6.23275e+08	9.61209e+07	9.19816e+08	9.96152e+07	4.03712e+08	9.87149e+08	3.67081e+08	4.35858e+08	3.65907e+08	1.33559e+09	9.14785e+07	2.13659e+08	3.7721e+08	8.05538e+08	1.82325e+08	1.77666e+08	2.4623e+08	4.85086e+08
736	M113T736	113.016	736	12.27	1.55174e+07	1.55006e+07	1.07435e+08	1.56094e+07	1.77349e+07	5.8035e+07	8.14741e+07	1.59971e+07	1.76946e+07	4.74735e+07	1.34172e+07	1.3053e+07	7.1245e+07	7.69147e+07	1.06994e+08	6.54044e+07	4.23068e+07	5.74989e+07	1.49362e+07	1.22291e+08	2.71526e+07	1.59481e+08	1.53941e+07	8.6957e+07	5.12087e+07	1.83704e+08	1.83616e+08	1.53089e+07	1.54143e+07
737	M113T34	113.034	33.996	0.57	2.3368e+07	2.34516e+07	2.58468e+07	1.10461e+08	7.13808e+07	9.59844e+07	8.55092e+07	2.7367e+07	2.51995e+07	1.44867e+08	6.42568e+07	2.32411e+07	1.29373e+08	1.03608e+08	2.25936e+07	7.38523e+07	2.97229e+07	8.8033e+07	1.16001e+08	5.98847e+07	1.48517e+08	5.48749e+07	6.97272e+07	6.06991e+07	6.41341e+07	5.08213e+07	1.25111e+08	7.7111e+07	8.42576e+07
738	M113T148	113.029	148.5	2.48	1.94456e+08	2.90836e+08	3.0378e+08	2.56358e+08	1.73816e+08	1.09993e+08	4.12291e+07	1.63436e+08	1.55751e+08	1.86377e+08	4.15305e+07	1.5867e+08	1.39385e+08	5.03648e+07	5.19991e+07	5.06783e+07	1.53861e+08	5.74063e+08	5.79538e+07	6.33602e+07	5.92644e+07	2.3013e+08	5.68596e+07	5.84729e+07	2.41938e+08	2.43502e+08	1.55996e+08	4.82761e+07	1.81674e+08
739	M113T129	113.034	128.673	2.14	3.59705e+07	1.03184e+08	1.67552e+08	1.53506e+08	3.76319e+07	1.42541e+08	1.50425e+08	1.61326e+08	1.37283e+08	1.80051e+08	4.21379e+07	3.90325e+07	6.64156e+07	2.19993e+08	5.80319e+07	5.84331e+07	1.31668e+08	2.71024e+08	6.4761e+07	6.64016e+07	7.55205e+07	6.59571e+07	6.56213e+07	7.12146e+07	9.42216e+07	5.55727e+07	1.04408e+08	1.40566e+08	5.72153e+07
740	M113T207	113.034	206.899	3.45	1.38688e+09	1.33399e+09	1.44634e+09	1.36623e+09	1.38226e+09	1.37584e+09	1.14783e+09	1.12374e+09	9.77217e+08	1.05782e+09	1.02529e+09	1.42131e+09	9.63468e+08	1.15278e+09	9.02789e+08	1.04036e+09	9.97655e+08	8.90381e+08	9.05969e+08	1.06839e+09	1.0606e+09	1.169e+09	9.71428e+08	1.07668e+09	1.20927e+09	1.13529e+09	1.19236e+09	1.15588e+09	1.18481e+09
741	M113T164	113.035	163.939	2.73	3.50443e+08	3.43881e+08	5.78813e+08	2.97832e+08	3.30407e+08	3.50999e+08	3.0224e+08	2.24175e+08	2.24186e+08	2.16903e+08	2.05854e+08	5.49688e+08	2.55164e+08	2.49804e+08	2.94901e+08	2.28268e+08	2.02698e+08	6.05601e+07	6.24963e+07	6.45488e+07	1.94307e+08	2.14185e+08	2.04166e+08	6.46972e+07	2.48738e+08	3.26462e+08	2.59067e+08	4.92926e+08	2.57907e+08
742	M113T76_2	113.04	76.1744	1.27	3.72494e+07	4.80692e+07	4.5343e+07	4.79675e+07	3.16806e+07	4.77341e+07	4.53765e+07	4.98076e+07	4.01607e+07	5.58955e+07	3.50236e+07	5.77703e+07	5.85167e+07	7.84922e+07	9.23234e+07	8.2616e+07	9.1927e+07	8.87133e+07	1.07476e+08	9.79026e+07	1.23105e+08	1.07362e+08	1.27685e+08	1.35035e+08	2.60905e+07	4.39081e+07	6.49928e+07	7.11752e+07	1.07814e+08
743	M113T104	113.06	103.859	1.73	1.81088e+08	1.13853e+07	1.80613e+08	2.00922e+08	1.75352e+08	1.9613e+08	1.22004e+08	1.86876e+08	1.84506e+08	1.25145e+08	2.37402e+08	1.43863e+08	1.77634e+08	4.1128e+07	6.79191e+08	4.67896e+07	1.89414e+08	1.47339e+08	3.00674e+08	4.3334e+08	9.78627e+08	1.88834e+08	2.18229e+08	9.0363e+08	2.05453e+08	8.36856e+07	1.8479e+08	1.7627e+08	4.17813e+08
744	M113T317	113.059	317.076	5.28	8.60964e+06	9.33292e+06	3.35069e+07	8.48701e+06	8.91666e+06	8.09906e+06	8.38204e+06	3.94017e+07	4.56156e+07	6.83878e+07	4.70707e+07	3.59786e+07	4.38588e+07	1.07894e+07	4.30912e+07	1.02663e+07	4.1558e+07	4.91491e+07	1.15579e+07	1.38398e+07	1.35516e+07	1.25868e+07	6.16874e+07	1.3942e+07	8.34747e+06	8.6521e+07	4.05108e+07	4.23935e+07	4.27605e+07
745	M113T376	113.059	376.082	6.27	6.3841e+06	5.88304e+06	2.25357e+07	6.3479e+06	6.52962e+06	7.00058e+06	6.65214e+06	2.52116e+07	2.10081e+07	1.12917e+08	2.63397e+07	2.50122e+07	3.08e+07	8.6926e+06	3.64801e+07	7.74333e+06	3.20642e+07	4.2566e+07	7.94666e+06	8.71431e+06	8.69929e+06	8.5636e+06	2.72887e+07	8.95938e+06	5.48314e+06	2.36824e+07	2.67711e+07	2.96152e+07	1.31913e+08
746	M113T144	113.06	143.812	2.4	1.87624e+07	1.66895e+07	4.49651e+07	1.83011e+07	1.66596e+07	1.75657e+07	1.98557e+07	8.68594e+07	2.13224e+08	7.07047e+07	5.99263e+07	1.67307e+08	1.07031e+08	1.57849e+08	2.40912e+07	2.39331e+07	1.18135e+08	7.12118e+07	2.72642e+07	3.4067e+07	3.16832e+07	3.43048e+07	1.21058e+08	3.2151e+07	1.54621e+07	1.12559e+08	6.43702e+07	9.21647e+07	1.25017e+08
747	M113T94_3	113.06	94.3503	1.57	2.41896e+08	2.41149e+08	2.3331e+08	2.21865e+08	2.16739e+08	2.44836e+08	1.6502e+08	1.69483e+08	1.29365e+08	1.98294e+08	2.2677e+08	1.46654e+08	9.02962e+07	1.76317e+07	2.47406e+07	1.85111e+07	1.50453e+07	9.45026e+07	8.6749e+07	1.92148e+07	2.27672e+07	2.00098e+07	7.67198e+07	2.47304e+07	9.98297e+07	1.71968e+08	1.00572e+08	1.65577e+08	1.66433e+07
748	M113T229	113.071	229.266	3.82	2.39403e+07	2.36441e+07	2.28508e+07	1.80054e+07	2.26858e+07	2.27794e+07	2.56317e+07	2.24082e+07	2.25813e+07	2.19699e+07	2.2255e+07	2.79089e+07	3.70518e+07	3.49721e+07	3.50551e+07	3.78501e+07	4.20253e+07	3.46424e+07	3.15361e+07	3.42372e+07	3.30434e+07	2.98439e+07	3.45913e+07	3.66268e+07	3.20967e+07	3.39952e+07	2.72487e+07	2.8258e+07	2.62165e+07
749	M113T103	113.09	103.254	1.72	1.6354e+07	1.84758e+07	1.709e+07	2.0273e+07	1.84823e+07	1.77161e+07	2.10922e+07	1.7421e+07	1.31234e+07	3.23845e+07	2.1704e+07	3.23809e+07	2.05855e+07	1.90382e+07	2.94762e+07	3.35881e+07	3.45208e+07	1.76391e+07	3.60678e+07	3.58239e+07	3.0216e+07	3.37253e+07	3.00987e+07	3.44625e+07	2.71863e+07	1.90548e+07	1.60742e+07	2.50112e+07	3.28379e+07
750	M113T418	113.096	417.898	6.96	4.37702e+06	3.81838e+06	3.40094e+06	4.3064e+06	4.30015e+06	3.20333e+06	6.69662e+06	6.04004e+06	4.66819e+06	4.26339e+06	5.53777e+06	5.41516e+06	7.86525e+06	5.61659e+06	5.10547e+06	5.4181e+06	6.16567e+06	5.91707e+06	5.67082e+06	5.7901e+06	4.34214e+06	6.96021e+06	6.3025e+06	5.31788e+06	6.10875e+06	5.37094e+06	5.55239e+06	4.45874e+06	5.53563e+06
751	M114T76_1	113.532	76.2873	1.27	5.6668e+07	7.46349e+07	5.61634e+07	7.93975e+07	7.93826e+07	8.05738e+07	7.30631e+07	9.56666e+07	8.88572e+07	5.084e+07	7.43917e+07	9.63595e+07	9.37152e+07	1.07008e+08	8.93144e+07	1.13955e+08	1.06353e+08	9.43427e+07	6.71605e+07	1.33253e+08	1.26293e+08	1.37442e+08	1.36562e+08	1.41603e+08	7.53702e+07	7.63635e+07	8.92434e+07	8.365e+07	1.07739e+08
752	M114T34	113.963	33.9812	0.57	2.21534e+08	3.5436e+08	1.80036e+08	1.69674e+08	2.66409e+08	1.89154e+08	1.80547e+08	1.69997e+08	3.99452e+07	4.96199e+07	1.90157e+08	1.78813e+08	1.70518e+08	4.46763e+07	1.86725e+08	1.8106e+08	1.82871e+08	2.03293e+08	2.58849e+08	2.15046e+08	1.9971e+08	1.83682e+08	1.95799e+08	1.94348e+08	2.23514e+08	1.92411e+08	2.03191e+08	1.59567e+08	4.45039e+07
753	M114T45	113.963	45.4533	0.76	2.65454e+08	3.73841e+08	2.24222e+08	3.8023e+08	7.15993e+07	1.73696e+08	3.21653e+08	3.68856e+08	1.00195e+09	1.01638e+09	3.31868e+08	2.76747e+08	2.48538e+08	2.54927e+08	3.93726e+08	3.22803e+08	1.82315e+08	3.16254e+08	2.05429e+08	3.0363e+08	3.70425e+08	2.14386e+08	3.31474e+08	2.93073e+08	3.66885e+08	3.71302e+08	3.33376e+08	3.74619e+08	9.51396e+08
754	M114T67	113.963	67.3376	1.12	2.37335e+08	3.443e+08	4.1979e+08	2.35302e+08	4.70147e+08	4.65426e+08	3.23978e+08	4.41218e+08	9.86901e+07	9.8666e+07	3.18986e+08	4.37754e+08	4.02067e+08	1.69432e+08	1.92759e+08	1.85204e+08	4.2841e+08	4.08861e+08	1.84196e+08	3.22959e+08	4.81084e+08	3.99685e+08	1.90377e+08	1.85441e+08	4.6183e+08	4.29981e+08	3.03385e+08	4.13951e+08	8.68247e+07
755	M114T155	113.964	154.578	2.58	3.09195e+07	1.20925e+08	1.25418e+08	1.21774e+08	3.20106e+07	3.09099e+07	1.57779e+08	1.4354e+08	1.3235e+08	3.73437e+07	3.69421e+07	1.39476e+08	3.68167e+07	5.92531e+07	1.39145e+08	1.41937e+08	3.34236e+07	1.61171e+08	1.33175e+08	1.26017e+08	1.38446e+08	1.28823e+08	3.31173e+07	1.31369e+08	1.41747e+08	1.24407e+08	1.61977e+08	3.10407e+07	3.19849e+07
756	M114T232	113.964	231.583	3.86	5.15806e+07	5.36812e+07	2.39143e+08	6.0955e+08	4.6756e+07	4.97394e+07	2.47175e+08	2.77852e+08	2.53525e+08	1.27992e+08	1.90814e+08	1.91474e+08	2.81402e+08	1.93332e+08	5.5914e+07	2.53746e+08	1.40575e+08	2.45797e+08	1.61786e+08	1.76928e+08	1.10912e+08	1.87066e+08	5.16954e+07	1.88429e+08	1.90295e+08	1.33983e+08	2.12807e+08	4.97144e+07	5.09082e+07
757	M114T141	113.964	140.812	2.35	7.31264e+07	1.05127e+08	7.21405e+07	6.73838e+07	2.41856e+07	4.83311e+07	8.16936e+07	1.27956e+08	2.62657e+07	1.02478e+08	3.62315e+08	2.46017e+07	3.34989e+08	7.57223e+07	2.55724e+07	2.52467e+07	6.1967e+07	2.41133e+07	2.70019e+07	2.29255e+07	6.65056e+07	2.36275e+07	2.44781e+07	2.05404e+07	2.5369e+07	1.1601e+08	2.30866e+07	1.17479e+08	1.0538e+08
758	M114T203	113.964	203.385	3.39	4.8086e+07	3.00031e+08	1.01912e+08	3.00144e+08	9.65342e+07	4.69147e+07	1.77787e+08	2.52542e+08	9.9124e+07	5.3936e+07	1.23862e+08	1.49095e+08	7.54572e+07	1.20743e+08	1.33399e+08	4.67231e+07	4.7123e+07	4.91949e+07	4.8771e+07	4.85363e+07	4.35159e+07	4.51297e+07	4.72785e+07	4.39521e+07	4.68186e+07	1.9347e+08	2.451e+08	5.01684e+07	5.06298e+07
759	M114T832	114.016	832.223	13.87	8.25106e+06	4.811e+07	7.45989e+06	6.608e+06	7.54397e+06	7.84775e+06	3.10377e+07	8.62439e+06	4.07418e+07	3.07829e+07	1.94912e+07	8.40371e+06	9.09119e+06	8.06893e+06	7.90391e+06	6.44854e+07	7.90811e+06	7.56196e+06	3.32985e+07	8.38895e+06	8.57214e+06	6.93674e+06	3.4986e+07	2.66852e+07	4.49186e+07	2.20142e+07	3.00392e+07	1.96333e+07	1.52676e+07
760	M114T815	114.016	815.5	13.59	1.0675e+07	3.44297e+07	9.01534e+06	1.07719e+07	9.402e+06	9.41791e+06	8.69253e+06	3.27855e+07	3.66363e+07	5.83048e+07	3.46879e+07	8.78263e+07	5.34638e+07	1.25513e+07	1.17784e+07	5.66136e+07	5.15443e+07	3.7733e+07	3.67317e+07	4.67294e+07	1.24192e+07	1.06947e+07	4.81847e+07	8.2212e+07	4.8656e+07	2.46176e+07	3.96238e+07	1.03499e+07	3.54963e+07
761	M114T207	114.038	206.92	3.45	5.27616e+07	5.55533e+07	5.97549e+07	4.92009e+07	6.17144e+07	5.36045e+07	4.31252e+07	4.48672e+07	3.83158e+07	4.30174e+07	3.17202e+07	5.47817e+07	3.82913e+07	4.64999e+07	3.08681e+07	4.48261e+07	3.56333e+07	3.62063e+07	3.40587e+07	4.4415e+07	4.36621e+07	4.05844e+07	4.10021e+07	4.48808e+07	4.994e+07	4.08657e+07	4.34416e+07	4.35417e+07	4.86625e+07
762	M114T76_2	114.047	76.345	1.27	1.60489e+08	1.58902e+08	1.29564e+08	1.62725e+08	1.3924e+08	1.6071e+08	1.6172e+08	1.80113e+08	1.6793e+08	1.56047e+08	1.43967e+08	8.85756e+07	1.3868e+08	1.40921e+08	1.34425e+08	1.29194e+08	1.50277e+08	1.28527e+08	1.68794e+08	1.47551e+08	1.35378e+08	1.66284e+08	1.62231e+08	1.43822e+08	1.86285e+08	1.43834e+08	1.88215e+08	1.65724e+08	1.21239e+08
763	M114T104	114.055	103.694	1.73	1.84767e+07	1.78319e+07	6.01788e+07	5.94302e+07	8.90262e+07	7.00242e+07	1.1313e+08	9.52124e+07	1.00252e+08	1.14724e+08	1.34888e+08	1.36342e+08	2.25779e+08	1.69605e+08	1.8534e+08	1.78164e+08	1.18885e+08	2.25652e+08	2.53869e+08	2.67913e+08	1.89901e+08	1.7029e+08	2.16889e+08	2.942e+08	1.44052e+08	1.52441e+08	1.79866e+08	1.80447e+08	1.74383e+08
764	M114T93	114.055	93.1455	1.55	2.62681e+07	3.02148e+07	3.22171e+07	1.0506e+07	3.13368e+07	9.12434e+06	1.2993e+07	1.28028e+07	4.20374e+07	3.82953e+07	1.25996e+07	5.36713e+07	8.15886e+07	5.65661e+07	7.41249e+07	5.15849e+07	1.38705e+07	5.61405e+07	6.82607e+07	1.41134e+07	7.7618e+07	1.23867e+07	4.97819e+07	1.52027e+07	1.5931e+07	6.61953e+07	5.24873e+07	4.96871e+07	6.8155e+07
765	M114T32	114.073	31.8854	0.53	8.42883e+06	2.90131e+07	7.35715e+06	7.59822e+06	7.3173e+06	6.68351e+06	3.39865e+07	7.89369e+06	2.5877e+07	2.95192e+07	2.83689e+07	2.58467e+07	2.09369e+07	2.45299e+07	2.70431e+07	2.37903e+07	2.66951e+07	2.82972e+07	2.72024e+07	2.59242e+07	2.83647e+07	2.42586e+07	2.39636e+07	2.33921e+07	6.7799e+06	8.39829e+06	2.84119e+07	2.33873e+07	2.542e+07
766	M114T837	114.091	836.747	13.95	5.57785e+07	1.65438e+07	3.90147e+07	7.39791e+07	6.13685e+07	6.16473e+07	2.97095e+08	7.16202e+07	8.52909e+07	8.08391e+07	1.83118e+07	1.92036e+07	1.74735e+08	1.81952e+08	9.01679e+07	7.06874e+07	1.14786e+08	6.22108e+07	1.07675e+08	1.73693e+08	5.56071e+07	1.50684e+08	7.27284e+07	1.62082e+08	4.8711e+07	7.59984e+07	3.11738e+08	1.79499e+08	1.77048e+07
767	M114T432	114.092	432.177	7.2	1.39391e+08	1.42784e+08	1.39318e+08	1.29487e+08	1.41296e+08	1.29094e+08	2.78468e+07	1.65336e+08	1.25126e+08	1.2874e+08	1.34849e+08	1.31387e+08	1.39789e+08	2.95823e+07	1.44406e+08	1.30273e+08	1.36961e+08	3.28243e+07	1.32437e+08	2.97576e+07	1.40503e+08	3.19976e+07	3.18226e+07	3.01672e+07	2.69411e+07	2.75887e+07	1.18705e+08	1.21562e+08	2.7223e+07
768	M114T704	114.091	703.822	11.73	2.01549e+08	2.82395e+08	9.46482e+07	2.62358e+07	1.04967e+08	2.51205e+07	2.54053e+07	2.77752e+08	9.02218e+07	2.31006e+07	8.66409e+07	2.91656e+08	2.32428e+07	1.05407e+08	1.06715e+08	7.49665e+07	2.41579e+07	1.36095e+08	9.08912e+07	1.24559e+08	1.2641e+08	2.01906e+08	7.70306e+07	8.69445e+07	7.91231e+07	2.49499e+07	2.29237e+07	2.23654e+07	1.0224e+08
769	M114T812	114.091	811.635	13.53	9.51387e+07	1.82877e+07	1.09603e+08	8.30657e+07	1.12626e+08	7.23871e+07	1.80567e+07	1.83013e+08	5.21108e+07	1.04773e+08	1.86751e+07	1.82281e+07	8.19228e+07	1.98762e+07	1.24084e+08	1.48235e+08	7.90463e+07	7.42008e+07	1.78738e+07	9.71553e+07	7.67027e+07	1.1875e+08	9.23115e+07	7.49455e+07	7.91276e+07	1.0006e+08	2.05764e+07	7.74926e+07	1.6293e+07
770	M114T729	114.091	729.499	12.16	3.38626e+07	2.36078e+08	7.70011e+07	2.43455e+08	2.03704e+08	9.60615e+07	1.45497e+08	3.67346e+08	2.3609e+08	1.06641e+08	7.66423e+07	3.19264e+08	3.51657e+07	1.24883e+08	2.61675e+08	1.00069e+08	1.38651e+08	4.31074e+08	2.1939e+08	1.00171e+08	1.3492e+08	1.05115e+08	2.39513e+08	9.16486e+07	9.53678e+07	6.27113e+08	3.8616e+08	6.16048e+08	3.31523e+07
771	M114T787	114.091	786.572	13.11	8.24732e+07	9.62618e+07	2.5295e+07	9.01277e+07	6.80575e+07	1.5205e+08	8.70334e+07	1.08864e+08	1.39032e+08	1.05943e+08	2.34405e+07	2.58492e+07	9.74428e+07	1.75842e+08	2.54367e+07	8.82739e+07	2.44898e+07	9.85172e+07	1.01753e+08	8.31511e+07	1.50563e+08	9.34851e+07	7.87933e+07	2.14689e+07	3.87075e+08	7.76812e+07	1.66611e+08	2.48733e+07	2.34914e+07
772	M114T826	114.091	826.399	13.77	1.29943e+08	2.13952e+08	1.16773e+08	1.27037e+08	6.43348e+07	9.318e+07	2.93336e+07	7.09035e+07	1.07007e+08	9.77599e+07	2.80469e+08	2.22352e+08	3.43285e+07	3.32247e+07	6.55044e+07	8.22972e+07	1.05273e+08	1.78375e+08	1.51411e+08	3.15235e+07	6.53646e+07	3.02999e+07	1.1458e+08	3.14285e+07	1.09135e+08	1.22319e+08	3.47301e+07	3.25226e+07	3.02224e+08
773	M114T668	114.091	668.38	11.14	1.50945e+08	1.08846e+08	1.17151e+08	1.2637e+08	1.20256e+08	9.28324e+07	1.41584e+08	3.10194e+08	3.18926e+07	3.31427e+07	1.00515e+08	8.93135e+07	3.31563e+07	3.2569e+07	1.94497e+08	7.40227e+07	3.57796e+07	1.34209e+08	3.74359e+08	9.66404e+07	9.60784e+07	6.34427e+07	3.20147e+07	1.97532e+08	1.99717e+08	1.19975e+08	1.18399e+08	3.29595e+07	1.12429e+08
774	M114T798	114.091	797.737	13.3	9.46673e+07	1.03156e+08	1.13495e+08	2.1992e+07	7.90995e+07	8.81353e+07	2.06386e+07	2.21382e+07	2.19657e+07	1.13778e+08	1.39425e+08	2.44313e+07	9.41795e+07	2.44709e+07	5.802e+07	1.94131e+07	1.10175e+08	9.83283e+07	8.54646e+07	6.71524e+07	1.96083e+07	7.33796e+07	1.21789e+08	2.01772e+08	2.29073e+07	1.02013e+08	2.18784e+07	9.20547e+07	1.95434e+07
775	M114T713	114.091	713.191	11.89	3.07887e+07	3.19923e+07	9.40162e+07	2.04579e+08	2.96613e+07	2.86433e+08	1.77897e+08	3.15662e+07	3.3381e+07	1.31823e+08	1.02411e+08	3.19728e+07	7.56037e+08	7.42727e+07	3.24967e+07	7.55135e+07	3.33713e+07	3.12301e+07	8.43054e+07	1.21146e+08	1.54754e+08	2.90509e+07	3.08553e+07	1.36658e+08	1.53292e+08	3.12714e+07	3.19625e+07	3.11769e+07	9.87645e+07
776	M114T596	114.091	596.416	9.94	5.0234e+08	2.68682e+07	9.42165e+07	1.08638e+08	2.57471e+07	7.95211e+07	2.50256e+07	2.61437e+07	2.49268e+07	5.9586e+08	1.44901e+08	2.72521e+07	1.20539e+08	2.60233e+07	2.62657e+07	8.67445e+07	5.05274e+08	8.47207e+07	3.10728e+07	1.04084e+08	5.97551e+08	1.12995e+08	2.68405e+07	1.33354e+08	2.47035e+07	2.78936e+07	2.67197e+07	1.01494e+08	2.4894e+07
777	M114T694	114.091	693.843	11.56	1.57603e+08	2.0726e+07	1.34975e+08	2.51456e+08	1.07984e+08	2.20753e+07	1.18417e+08	2.34129e+07	1.0593e+08	1.04e+08	8.80621e+07	2.25469e+07	2.30393e+07	7.88138e+07	1.04997e+08	8.5792e+07	9.23888e+07	8.3816e+07	1.11141e+08	8.67184e+07	8.09552e+07	1.81657e+07	1.006e+08	1.23107e+08	1.02952e+08	2.07291e+07	3.89295e+08	2.26764e+07	9.81663e+07
778	M114T606	114.091	606.423	10.11	2.99648e+07	7.84524e+08	1.46851e+08	8.95376e+07	2.86878e+07	1.27859e+08	2.76703e+07	7.85664e+08	7.54e+07	2.88811e+07	8.70766e+07	1.20169e+08	2.98553e+07	1.1944e+08	9.73467e+08	7.11137e+07	3.13442e+07	3.36239e+07	8.35266e+08	1.24273e+08	3.13834e+07	6.95236e+07	2.83337e+08	9.79533e+07	5.67608e+08	1.94009e+08	7.69069e+08	1.49627e+08	1.07425e+08
779	M114T771	114.091	770.918	12.85	9.99204e+07	3.18333e+07	2.97664e+07	2.9115e+07	2.70426e+07	1.09389e+08	2.82559e+07	1.34055e+08	7.95521e+07	1.09658e+08	1.71678e+08	4.72429e+08	1.29628e+08	2.80748e+07	3.71277e+08	1.5401e+08	3.77436e+08	2.67271e+07	1.2412e+08	1.88227e+08	8.71156e+07	1.02013e+08	7.79827e+07	2.63188e+07	2.71906e+07	2.87186e+07	2.80003e+07	2.96465e+07	2.59772e+07
780	M114T647	114.091	647.161	10.79	1.98365e+08	2.6724e+07	7.56459e+07	1.75688e+08	2.64984e+07	9.67219e+07	1.17551e+08	2.5189e+07	9.97243e+07	4.11056e+08	7.87241e+07	1.20735e+08	1.51451e+08	2.34261e+07	2.45803e+07	1.94767e+08	2.73824e+07	2.5352e+07	2.6665e+07	7.45569e+07	1.12546e+08	1.03827e+08	2.73524e+07	1.03202e+08	1.20785e+08	2.26068e+07	9.57538e+07	1.14405e+08	9.62523e+07
781	M114T760	114.091	759.847	12.66	2.1527e+07	3.18753e+08	4.36454e+08	1.07744e+08	1.79593e+08	2.36467e+07	2.42048e+07	2.60503e+07	9.31636e+07	8.92703e+07	2.72314e+07	2.64085e+07	8.09243e+07	2.38494e+08	2.56162e+07	1.23172e+08	2.66401e+07	2.5903e+07	1.25224e+08	2.36257e+07	8.79687e+07	2.15313e+07	9.80588e+07	1.22047e+08	2.29738e+07	2.50259e+07	2.569e+07	2.65773e+07	2.33411e+07
782	M115T226	114.512	225.893	3.76	9.90994e+07	1.34144e+08	9.18168e+07	1.23913e+08	1.44019e+08	1.26393e+08	9.16748e+07	9.67885e+07	1.21744e+08	1.14427e+08	8.56834e+07	1.09093e+08	9.20382e+07	1.01029e+08	9.80224e+07	1.15577e+08	1.05246e+08	6.20146e+07	1.34095e+08	1.16198e+08	8.8578e+07	1.19297e+08	1.31922e+08	1.06584e+08	1.08389e+08	1.05258e+08	9.8994e+07	1.22278e+08	9.90752e+07
783	M115T211	114.512	211.315	3.52	7.30095e+07	1.1645e+08	7.85511e+07	7.17283e+07	7.4633e+07	9.29469e+07	7.80541e+07	8.43802e+07	1.22799e+08	1.33089e+08	1.3098e+08	1.08632e+08	4.37175e+07	1.14245e+08	5.19089e+07	9.71132e+07	1.22005e+08	5.64294e+07	1.03462e+08	1.0772e+08	1.2112e+08	1.14616e+08	2.59004e+07	1.06537e+08	1.0437e+08	1.03852e+08	5.10809e+07	5.96811e+07	6.2064e+07
784	M115T268_1	114.513	268.033	4.47	2.18449e+08	2.18514e+08	2.42077e+08	2.4584e+08	2.67249e+08	2.53501e+08	1.15325e+08	1.16986e+08	2.53566e+08	2.61776e+08	2.63e+08	1.97371e+08	1.44343e+08	1.06092e+08	2.10287e+08	1.3437e+08	2.2686e+08	2.25654e+08	1.49569e+08	1.35781e+08	2.75007e+08	2.40925e+08	1.74944e+08	2.24095e+08	2.30932e+08	2.34833e+08	1.46627e+08	2.37322e+08	7.3301e+07
785	M115T34	114.964	34.0198	0.57	3.35955e+06	1.83753e+07	3.56884e+06	1.42878e+07	1.73551e+07	4.9361e+06	1.52231e+07	2.84855e+06	1.21331e+07	4.2014e+06	1.70233e+07	3.59324e+06	1.64647e+07	3.51788e+06	3.77937e+06	5.19851e+06	1.88389e+06	5.87284e+06	3.82112e+06	5.11108e+06	3.80565e+06	2.93902e+06	3.75195e+06	2.70642e+07	4.57841e+06	4.14088e+06	4.54636e+06	5.7329e+06	2.58544e+06
786	M115T66	114.964	66.1451	1.1	4.02351e+07	2.95095e+06	6.445e+06	2.9782e+06	3.73497e+07	3.03944e+06	3.52163e+07	3.73977e+06	3.58265e+07	3.23317e+06	4.08889e+07	4.06074e+07	4.35644e+07	5.40557e+06	5.23157e+06	4.94564e+07	3.08651e+06	5.1235e+07	3.80111e+06	7.44316e+06	9.07557e+06	7.21742e+06	3.69921e+06	5.74564e+07	9.97429e+06	4.8185e+06	8.6552e+06	4.35445e+06	2.23075e+06
787	M115T76	114.987	76.4063	1.27	1.311e+08	1.21038e+08	4.41075e+07	1.36227e+08	1.44447e+08	1.46528e+08	1.56911e+08	1.49031e+08	1.42313e+08	1.45032e+08	1.38989e+08	1.63335e+08	1.34099e+08	1.34669e+08	1.47964e+08	1.36899e+08	1.24873e+08	1.45105e+08	1.54769e+08	1.3747e+08	1.62989e+08	1.55109e+08	1.46365e+08	1.80228e+08	4.34391e+07	1.44428e+08	1.66262e+08	1.4958e+08	1.37279e+08
788	M115T268_2	115.014	268.033	4.47	9.70819e+06	1.0003e+07	1.78136e+07	1.60982e+07	1.24093e+07	1.12766e+07	8.32586e+06	1.89151e+07	9.95913e+06	3.31305e+06	1.77146e+07	9.36354e+06	1.89051e+07	1.7903e+07	9.02155e+07	8.74977e+06	9.7619e+07	1.38177e+07	9.15641e+06	1.72553e+07	1.73377e+07	1.66925e+07	1.25121e+07	1.48767e+07	1.56559e+07	1.56515e+07	7.93896e+07	9.65048e+06	1.70257e+07
789	M115T103	115.039	103.457	1.72	6.8973e+08	2.81321e+08	3.06598e+08	3.32541e+08	9.61983e+08	4.0524e+08	7.74635e+08	7.10571e+08	6.25511e+08	6.45702e+08	7.87663e+08	6.56608e+08	9.37364e+08	1.08032e+09	1.14e+09	9.71646e+08	1.05743e+09	9.39119e+08	1.64893e+09	7.81933e+08	5.13097e+09	1.03384e+09	1.24656e+09	5.33472e+09	6.65571e+08	8.03607e+08	1.06855e+09	8.76032e+08	2.69189e+09
790	M115T94	115.039	94.3845	1.57	4.39621e+07	1.7294e+08	1.77625e+08	1.82234e+08	4.44336e+07	1.77879e+08	4.49489e+08	5.70493e+08	3.63965e+08	4.3069e+08	4.95254e+08	4.917e+08	7.86207e+08	7.8551e+08	6.8782e+08	7.47263e+08	7.20594e+08	1.5046e+08	8.82796e+08	7.48434e+08	1.61094e+08	1.55647e+08	1.50652e+08	1.81026e+08	6.3772e+08	6.38861e+08	6.58686e+08	5.92992e+08	1.29147e+08
791	M115T91	115.05	91.0465	1.52	3.66563e+07	4.58508e+07	3.20111e+07	3.31574e+07	3.75328e+07	2.89725e+07	2.44986e+07	2.78208e+07	2.59714e+07	2.67635e+07	2.87994e+07	4.81067e+07	1.61966e+07	2.4755e+07	2.06798e+07	1.98921e+07	1.70428e+07	2.02542e+07	1.57227e+07	1.43561e+07	2.87542e+07	7.55052e+07	7.62517e+07	1.60623e+07	2.78757e+07	2.62233e+07	2.14163e+07	3.35382e+07	2.95834e+07
792	M115T378	115.075	377.664	6.29	1.3564e+07	2.1306e+07	1.20125e+07	1.06078e+07	1.45357e+07	1.29556e+07	1.28786e+07	1.34153e+07	1.43084e+07	2.72537e+07	1.09645e+07	3.45682e+07	2.91584e+06	2.45165e+06	2.79965e+06	1.48041e+07	2.77944e+06	2.4213e+07	2.48228e+06	2.09102e+06	2.41712e+06	2.55494e+06	1.12703e+07	1.06573e+07	1.09106e+07	1.30697e+07	1.69051e+07	1.35801e+07	8.55458e+06
793	M115T68	115.075	68.0657	1.13	2.08054e+06	4.58873e+06	2.82235e+06	3.04475e+06	1.07354e+07	1.72735e+07	1.08095e+07	4.82444e+06	2.57649e+06	2.25109e+06	5.7294e+06	9.96902e+06	2.30237e+06	1.30318e+07	5.44677e+06	6.16684e+06	2.17568e+06	2.2047e+06	7.4694e+06	7.07419e+06	8.35085e+06	1.90077e+06	9.59774e+06	7.75816e+06	7.97864e+06	2.14455e+06	2.27465e+06	5.55118e+06	1.8509e+06
794	M116T270	115.529	270.121	4.5	5.27031e+07	5.5911e+07	2.56955e+07	3.99513e+07	6.23289e+07	2.97117e+07	3.40619e+07	3.71908e+07	3.48313e+07	3.98392e+07	2.70618e+07	4.93687e+07	5.86529e+07	5.88558e+07	2.68291e+07	5.75973e+07	3.34433e+07	5.24973e+07	3.64494e+07	2.8939e+07	3.87761e+07	5.41038e+07	1.58546e+07	2.13522e+07	3.69092e+07	4.40896e+07	5.79249e+07	3.11142e+07	3.93955e+07
795	M116T263	115.529	263.405	4.39	5.73043e+06	5.40777e+06	4.09616e+07	2.58985e+07	7.1279e+06	4.25101e+07	2.38252e+07	3.05528e+07	3.12977e+07	2.59836e+07	3.99106e+07	3.31064e+07	6.05815e+06	7.57788e+06	2.8962e+07	8.49175e+06	2.36063e+07	7.00896e+06	1.69399e+07	6.88793e+06	2.65967e+07	7.30232e+06	2.74592e+07	3.02466e+07	3.1917e+07	1.9231e+07	5.67899e+06	3.26143e+07	2.20578e+07
796	M116T34	115.964	33.9552	0.57	2.26819e+07	1.68821e+07	1.82541e+07	2.18692e+07	1.4045e+07	2.78785e+07	2.08437e+07	1.55067e+07	1.95003e+07	2.13139e+07	2.37441e+07	4.93205e+06	1.49104e+07	3.96052e+07	1.57764e+07	2.50968e+07	2.08441e+07	1.58604e+07	2.49789e+07	2.46895e+07	3.69231e+07	1.26351e+07	5.92662e+06	1.9881e+07	3.12649e+07	1.84887e+07	2.94325e+07	1.95248e+07	2.1403e+07
797	M116T69	115.964	68.8094	1.15	5.10455e+06	7.71663e+06	4.31157e+06	7.78197e+06	9.75102e+06	1.43849e+07	4.59356e+06	1.08354e+07	8.16292e+06	7.06386e+06	9.44228e+06	9.24087e+06	9.34184e+06	7.42108e+06	6.44012e+06	1.14695e+07	2.33203e+07	1.9131e+07	1.56915e+07	4.46752e+06	6.37502e+06	1.63103e+07	1.03131e+07	9.70957e+06	4.21526e+06	8.31686e+06	2.45147e+07	7.85714e+06	8.77877e+06
798	M116T62	115.963	61.8958	1.03	6.04714e+06	5.0579e+06	4.97862e+06	4.70572e+06	1.68634e+07	5.24836e+06	5.02575e+06	1.68506e+07	9.83044e+06	8.63706e+06	2.3081e+07	5.73275e+06	6.09575e+06	2.25346e+07	5.85723e+06	9.36853e+06	5.04465e+06	5.89109e+06	5.50879e+06	2.2864e+07	9.52436e+06	6.28692e+06	2.00883e+07	2.27069e+07	2.182e+07	1.10259e+07	5.03147e+06	2.00081e+07	1.04827e+07
799	M116T825	115.964	825.191	13.75	1.17492e+07	5.92152e+06	5.09523e+07	1.68232e+07	1.3175e+07	3.54233e+07	1.27326e+07	6.29358e+06	1.56381e+07	1.32333e+07	4.49601e+07	6.00645e+06	2.81663e+07	2.23513e+07	2.29805e+07	7.53087e+06	7.43401e+06	1.72115e+07	8.62718e+06	1.62974e+07	5.56048e+07	7.21812e+06	7.36578e+06	2.76361e+07	2.39788e+07	5.38842e+06	5.64165e+06	4.33976e+07	2.57071e+07
800	M116T833	115.964	833.302	13.89	9.71211e+06	1.36522e+07	3.04413e+06	1.21506e+07	5.27133e+06	2.46823e+06	1.24186e+07	1.52847e+07	7.15547e+06	1.63876e+07	3.47815e+06	1.97784e+07	1.20675e+07	1.13001e+07	1.01755e+07	2.97193e+06	4.1246e+06	3.90895e+06	1.09758e+07	3.34137e+06	3.82145e+06	8.47612e+06	2.86556e+06	1.24522e+07	8.51645e+06	1.03498e+07	2.83235e+06	3.60139e+06	1.38903e+07
801	M116T47	115.963	46.568	0.78	2.86749e+07	4.78672e+06	4.47768e+06	4.44134e+06	1.09628e+07	2.13801e+07	4.9981e+06	2.09886e+07	1.77774e+07	1.32372e+07	1.98956e+07	6.13824e+07	4.54064e+06	4.54098e+06	5.01951e+06	1.39044e+07	4.99571e+06	1.47505e+07	1.51867e+07	4.83313e+06	5.11106e+06	1.60323e+07	2.60177e+07	1.82865e+07	4.7627e+06	1.7655e+07	4.59789e+06	1.95333e+07	2.46217e+07
802	M116T795	115.964	795.028	13.25	1.1434e+07	1.15124e+07	5.58564e+07	8.10696e+07	3.31016e+07	1.17436e+07	3.55002e+07	1.07571e+07	9.52333e+06	1.05553e+07	2.76558e+07	4.70562e+07	1.06293e+07	2.53639e+07	3.48122e+07	1.19629e+07	1.13497e+07	4.70511e+07	1.42449e+07	1.07861e+07	3.24975e+07	1.10695e+07	1.21799e+07	8.20683e+07	2.71994e+07	8.68399e+07	1.04594e+07	2.66124e+07	9.46025e+07
803	M116T772	115.964	771.545	12.86	8.19305e+06	8.87063e+06	5.27808e+07	2.96879e+07	3.35001e+07	8.92593e+06	2.97238e+07	8.71702e+06	9.5344e+06	4.96628e+07	1.31051e+07	3.09918e+07	9.47423e+06	3.14802e+07	3.57756e+07	9.27376e+06	8.22987e+06	9.9186e+06	8.16425e+06	6.80736e+07	3.26419e+07	8.06041e+06	9.04802e+06	2.32225e+07	3.45936e+07	4.68146e+07	2.80372e+07	5.91902e+07	4.5277e+07
804	M116T90	116.034	90.1362	1.5	4.12864e+08	3.82327e+08	4.02769e+08	4.00952e+08	4.14564e+08	4.31324e+08	5.66205e+08	5.62007e+08	4.8512e+08	4.76734e+08	4.7465e+08	7.24322e+08	5.29138e+08	5.40159e+08	5.3261e+08	5.37015e+08	5.27846e+08	5.43656e+08	6.21818e+08	5.40741e+08	5.82237e+08	5.6288e+08	5.84668e+08	9.68768e+08	5.4219e+08	5.37555e+08	5.24578e+08	5.3897e+08	5.47659e+08
805	M116T77	116.034	76.6196	1.28	2.23237e+08	2.34976e+08	2.11931e+08	2.20496e+08	2.4886e+08	2.15949e+08	2.25223e+08	2.61825e+08	2.41859e+08	2.50439e+08	2.21998e+08	2.34853e+08	2.17861e+08	2.52906e+08	2.62738e+08	2.77798e+08	2.54578e+08	2.48996e+08	3.26443e+08	2.70361e+08	3.2637e+08	3.38887e+08	3.32531e+08	8.77312e+07	2.04317e+08	2.03223e+08	2.79474e+08	2.53791e+08	2.95553e+08
806	M116T102	116.034	102.444	1.71	7.46379e+06	4.93982e+06	5.12048e+07	5.12161e+07	4.55042e+07	5.8445e+06	1.67975e+07	2.51451e+07	3.64187e+07	2.81213e+07	2.06621e+07	1.11937e+08	5.85483e+07	5.25326e+07	5.84846e+07	4.58871e+07	4.88506e+07	4.78563e+07	6.90015e+07	6.74099e+07	6.19481e+07	5.53559e+07	4.75613e+07	1.96511e+07	5.41685e+07	4.02884e+07	8.10606e+07	3.16267e+07	5.56029e+07
807	M116T36	116.034	36.3478	0.61	1.38058e+07	8.13887e+06	4.99771e+06	5.64471e+06	6.19496e+06	8.29448e+06	3.17566e+06	1.51526e+07	1.64016e+07	6.12541e+06	1.12654e+07	5.85303e+06	4.6164e+06	5.01959e+06	5.2192e+06	6.0988e+06	6.42973e+06	1.20472e+07	7.38557e+06	6.58947e+06	6.34646e+06	5.67856e+06	1.18516e+07	1.01606e+07	7.04596e+06	6.06847e+06	1.08321e+07	1.43532e+07	1.08853e+07
808	M116T48	116.034	48.114	0.8	4.07328e+06	1.02949e+07	3.93807e+06	1.83689e+07	3.82089e+06	1.79067e+07	4.89723e+06	1.28174e+07	5.19906e+06	4.31752e+07	1.50351e+07	5.396e+06	4.815e+06	4.60077e+06	1.25306e+07	4.49432e+06	7.77622e+06	4.63418e+06	5.02358e+06	4.64114e+06	1.20827e+07	5.09235e+06	4.7388e+06	1.14877e+07	4.58588e+06	4.48202e+06	1.66822e+07	2.02929e+07	4.58178e+06
809	M116T99_1	116.07	99.3953	1.66	5.66481e+09	6.14097e+09	6.36206e+09	5.88936e+09	6.28041e+09	6.46083e+09	1.59011e+10	1.66569e+10	1.08914e+10	1.52839e+10	1.63361e+10	2.16003e+10	4.34022e+10	3.88521e+10	3.67067e+10	3.36427e+10	3.53282e+10	3.47378e+10	4.35524e+10	4.62873e+10	4.4145e+10	4.30449e+10	3.6827e+10	4.02168e+10	2.80645e+10	2.74688e+10	2.84552e+10	2.7442e+10	2.7004e+10
810	M116T312	116.071	311.5	5.19	1.14436e+08	1.03049e+08	1.06065e+08	9.6785e+07	1.01932e+08	9.04282e+07	1.26818e+08	1.28296e+08	9.87269e+07	1.1839e+08	1.26401e+08	1.80925e+08	2.24791e+08	2.50929e+08	2.18693e+08	2.24055e+08	2.53565e+08	2.02703e+08	1.81256e+08	4.56713e+08	2.63473e+08	2.40891e+08	2.0542e+08	2.28706e+08	1.46359e+08	1.60531e+08	1.76656e+08	1.63344e+08	1.78364e+08
811	M116T33	116.107	32.8985	0.55	1.50181e+07	1.53042e+07	1.57561e+07	1.6492e+07	9.19941e+06	1.58464e+07	1.69832e+07	9.32396e+06	1.77128e+07	1.10769e+07	1.0821e+07	9.42336e+06	1.50245e+07	1.70033e+07	6.85868e+06	1.54621e+07	1.16411e+07	2.05374e+07	1.77345e+07	1.74585e+07	1.21762e+07	1.73921e+07	1.36679e+07	1.6207e+07	5.37878e+06	1.6622e+07	1.45659e+07	1.85307e+07	1.05005e+07
812	M116T63	116.107	62.7214	1.05	1.66576e+07	1.64346e+07	1.54335e+07	1.40256e+07	1.90306e+07	5.79088e+06	1.35563e+07	9.64865e+06	7.38303e+06	1.31732e+07	8.01678e+06	9.86591e+06	2.14357e+07	1.88604e+07	2.07854e+07	1.06442e+07	1.82744e+07	2.02605e+07	1.93496e+07	1.91055e+07	1.69558e+07	2.17488e+07	2.09182e+07	2.11529e+07	8.06987e+06	2.09202e+07	1.64643e+07	5.88807e+06	1.94721e+07
813	M116T99_2	116.111	99.3492	1.66	1.39375e+09	1.47251e+09	1.50181e+09	1.46563e+09	1.51003e+09	1.58228e+09	2.05485e+07	1.97526e+07	2.69317e+09	3.77929e+09	3.99871e+09	2.6335e+07	5.30967e+07	4.6557e+07	4.14855e+07	5.51649e+07	5.2839e+07	4.0508e+07	4.4256e+07	6.2815e+07	6.51194e+07	6.88127e+07	5.34568e+07	5.86316e+07	6.82198e+09	3.02169e+07	4.21237e+07	6.74897e+09	6.5316e+09
814	M117T130	116.51	129.586	2.16	7.83482e+07	2.74423e+07	2.51883e+07	1.09452e+08	2.32406e+07	9.06016e+07	9.75051e+07	1.07549e+08	8.2061e+07	1.01832e+08	1.22555e+08	1.08817e+08	7.51088e+07	7.63796e+07	8.95411e+07	2.22773e+08	8.01961e+07	2.06752e+08	9.69451e+07	1.77729e+08	7.49043e+07	1.99596e+08	8.72427e+07	1.45532e+08	1.30206e+08	8.61685e+07	2.33318e+07	2.35998e+08	7.93776e+07
815	M117T122_1	116.51	122.184	2.04	1.23595e+08	2.36596e+08	3.02639e+08	1.78912e+08	3.08176e+08	1.17651e+08	8.87246e+07	1.17975e+08	1.03891e+08	1.07903e+08	1.74742e+08	8.65753e+07	9.95806e+07	7.42512e+07	7.52145e+07	2.3643e+07	1.11778e+08	2.19787e+07	7.99959e+07	1.74992e+07	9.27248e+07	2.02557e+07	7.93789e+07	1.79154e+07	2.65497e+07	1.52623e+08	2.40684e+08	2.52484e+07	8.11872e+07
816	M117T36	116.524	36.3018	0.61	7.04309e+06	8.4197e+06	5.56431e+06	6.18594e+06	7.36154e+06	5.46177e+06	9.15011e+06	5.89975e+06	6.17723e+06	8.76307e+06	8.15682e+06	6.65482e+06	1.83246e+06	2.06765e+06	6.45587e+06	6.93096e+06	1.76846e+06	6.68866e+06	6.65389e+06	1.84737e+06	6.97757e+06	6.27953e+06	6.96614e+06	8.50761e+06	6.65016e+06	6.61452e+06	7.34551e+06	7.37672e+06	1.87001e+06
817	M117T249	116.528	249.118	4.15	8.33746e+06	1.04671e+07	2.38096e+06	1.80911e+06	2.06345e+06	5.45044e+06	1.15125e+07	1.36724e+07	2.22238e+07	1.37892e+07	9.73068e+06	3.45694e+06	1.01346e+07	1.14631e+07	2.75278e+06	1.43893e+07	5.33272e+06	7.55897e+06	7.8493e+06	1.58374e+07	1.27408e+07	2.81032e+06	1.23536e+07	1.19455e+07	2.6656e+06	1.21469e+07	1.24105e+07	8.05654e+06	1.14469e+07
818	M117T76_1	116.985	76.2918	1.27	7.70194e+06	1.52177e+07	7.4603e+06	1.73722e+07	1.96712e+07	7.853e+06	8.2244e+06	1.71997e+07	1.84494e+07	1.29446e+07	1.98089e+07	1.54782e+07	8.43547e+06	7.51426e+06	1.31581e+07	1.71669e+07	1.50681e+07	1.87976e+07	9.63769e+06	2.373e+07	9.99091e+06	1.49424e+07	1.85871e+07	2.21964e+07	1.45163e+07	1.83044e+07	8.6345e+06	1.46092e+07	1.35627e+07
819	M117T76_2	117.033	76.2737	1.27	2.98147e+07	2.87418e+07	2.8987e+07	2.49153e+07	2.23508e+07	3.05769e+07	8.71441e+06	2.91739e+07	3.08813e+07	7.55731e+06	2.53541e+07	9.22306e+06	8.44193e+06	2.65384e+07	3.02683e+07	3.75335e+07	3.79699e+07	1.84827e+07	3.52735e+07	4.1679e+07	1.04958e+07	4.01397e+07	3.93244e+07	4.61754e+07	6.5338e+06	2.72137e+07	3.19513e+07	2.92653e+07	9.99773e+06
820	M117T435	117.033	435.135	7.25	1.22191e+06	4.13221e+06	545521	541277	2.36487e+06	765242	856421	1.07794e+07	2.72077e+07	2.24036e+07	1.39079e+07	1.27656e+07	7.53631e+06	2.59904e+06	1.48509e+06	7.28814e+06	6.89165e+06	8.87495e+06	8.46096e+06	2.05336e+06	464749	1.01063e+06	1.15833e+06	1.40082e+07	372345	466819	8.95816e+06	9.09708e+06	621686
821	M117T102	117.054	102.497	1.71	3.12731e+08	2.73824e+08	3.15553e+08	3.17538e+08	3.16298e+08	3.05182e+08	3.43893e+09	1.33922e+09	8.37776e+08	1.01484e+09	1.40033e+09	3.34093e+09	8.05854e+09	1.72897e+09	7.73842e+09	5.67711e+09	6.23858e+09	1.65677e+09	6.99321e+09	1.4279e+09	9.88806e+09	6.79515e+09	2.26148e+09	7.33075e+09	9.5546e+08	1.40178e+09	3.92504e+09	1.26134e+09	1.43016e+09
822	M117T145	117.054	145.257	2.42	2.00282e+08	1.5533e+08	4.00399e+08	5.09998e+08	3.64396e+08	2.58201e+08	4.88478e+08	9.77479e+08	3.35251e+08	2.93736e+08	5.70709e+08	4.10372e+08	2.44786e+08	1.35676e+09	2.47735e+08	8.09092e+08	9.11274e+08	1.22919e+09	1.11895e+09	1.88285e+09	3.21436e+08	3.00076e+09	2.34716e+09	9.56781e+08	6.25743e+08	5.85353e+08	3.66268e+08	4.20131e+08	8.86941e+08
823	M117T94	117.055	94.2777	1.57	2.54971e+08	2.38208e+08	2.38676e+08	2.15382e+08	2.18976e+08	2.25421e+08	1.65031e+08	7.91085e+08	6.43066e+08	8.7606e+08	8.17165e+08	1.5956e+08	2.35935e+08	9.38927e+08	2.2871e+08	2.16145e+08	2.10022e+08	1.0814e+09	2.57795e+08	1.16587e+09	1.87773e+08	2.3888e+08	9.39902e+08	2.94863e+08	1.33185e+09	1.15485e+09	2.35627e+08	8.08525e+08	7.74554e+08
824	M117T179	117.054	178.978	2.98	3.07421e+07	1.1097e+08	8.50095e+07	2.98455e+07	3.03801e+07	1.42058e+08	1.70364e+08	4.71156e+07	2.60307e+08	1.79603e+08	2.0912e+08	2.54904e+08	3.76269e+08	5.59167e+08	8.83973e+07	3.58826e+08	3.04188e+08	5.91354e+08	1.08425e+08	1.0923e+08	4.43348e+08	5.01898e+08	5.34854e+08	1.02455e+08	3.9953e+07	1.90046e+08	2.42367e+08	3.05537e+08	4.34912e+08
825	M117T226	117.054	226.027	3.77	1.25967e+08	1.68809e+08	1.34012e+08	2.20851e+08	3.11026e+08	1.27592e+08	2.87586e+08	4.63593e+07	3.54722e+07	1.48121e+08	2.38386e+08	4.54429e+08	6.92834e+07	7.46818e+07	3.0791e+08	7.56806e+07	4.13264e+08	7.4105e+07	4.34963e+08	8.94635e+07	3.34973e+08	5.15766e+08	3.17422e+08	1.01323e+08	1.56598e+08	1.45105e+08	1.86337e+08	1.8954e+08	5.14266e+08
826	M117T322	117.055	322.351	5.37	7.9363e+07	8.93014e+07	5.98489e+07	6.92266e+07	7.09108e+07	9.21419e+07	1.04889e+08	2.22939e+07	8.39587e+07	2.04484e+08	1.15394e+08	2.20756e+07	1.28986e+08	3.1603e+07	2.98492e+07	3.08595e+07	2.79127e+07	3.0805e+07	1.48682e+08	3.93554e+07	3.84618e+07	4.01248e+07	3.6985e+07	4.13823e+07	9.24471e+07	8.72486e+07	1.38313e+08	1.91693e+08	3.11714e+07
827	M117T160	117.054	160.338	2.67	1.84446e+08	1.91e+08	3.56925e+07	3.87551e+07	3.88039e+07	1.30126e+08	2.14727e+08	7.55967e+07	1.52959e+08	3.70545e+08	7.12165e+07	3.09297e+08	1.39535e+08	7.47058e+08	1.16905e+08	5.98741e+08	4.84954e+08	4.01673e+08	8.84119e+08	1.74543e+08	1.81926e+08	1.81333e+08	1.7767e+08	1.82201e+08	5.3566e+07	2.10349e+08	3.40318e+08	4.20511e+08	1.06007e+09
828	M117T169	117.054	169.31	2.82	3.5944e+07	1.23109e+08	1.32516e+08	1.37522e+08	3.21362e+07	1.20043e+08	2.53022e+08	6.06104e+07	2.4141e+08	6.31887e+07	3.94072e+08	2.47529e+08	3.93784e+08	1.03967e+08	3.77671e+08	1.01732e+08	9.97044e+07	9.69177e+07	1.1894e+08	8.59812e+08	8.08968e+08	4.46804e+08	1.21189e+08	1.17969e+09	1.96282e+08	5.00267e+07	6.3204e+07	3.5438e+08	1.08935e+08
829	M117T49	117.054	48.6118	0.81	3.72056e+08	4.42002e+07	7.69368e+07	2.53736e+08	4.90186e+07	1.28689e+08	4.64377e+07	5.06758e+07	5.49429e+08	5.52897e+07	5.75871e+07	5.90607e+07	6.778e+07	8.5253e+08	8.29701e+07	2.14386e+08	3.5723e+08	1.02566e+09	2.95436e+08	3.15957e+08	2.44142e+08	1.19171e+09	3.49516e+08	3.25244e+08	2.01208e+07	3.87977e+07	5.1493e+07	5.94114e+08	1.14371e+08
830	M117T122_2	117.054	122.022	2.03	4.77872e+08	1.91792e+08	2.48124e+08	1.92011e+08	3.23042e+08	3.40723e+08	1.68534e+08	8.1483e+08	6.1996e+08	4.64566e+08	4.70798e+08	1.92148e+08	3.48913e+08	1.94908e+09	3.28714e+08	3.64294e+08	4.07988e+08	3.03687e+09	4.26152e+08	2.08923e+09	4.36367e+08	4.66553e+08	1.62781e+09	4.6816e+08	4.73572e+08	5.60826e+08	2.02787e+08	6.87155e+08	2.6088e+09
831	M117T191	117.054	191.439	3.19	5.16933e+07	1.91353e+08	1.07328e+08	2.68072e+08	5.04963e+08	1.85075e+08	2.2615e+08	3.38236e+08	1.86004e+08	2.67458e+08	3.60716e+08	8.20856e+07	1.23702e+08	1.2349e+08	1.13934e+08	1.19384e+08	3.4537e+08	3.19361e+08	1.36511e+08	1.57595e+08	1.63093e+08	1.71851e+08	1.48202e+08	4.44006e+08	3.35827e+08	1.56032e+08	3.50043e+08	2.63641e+08	1.3487e+08
832	M117T274	117.054	273.767	4.56	4.67464e+07	5.05962e+08	2.18925e+08	5.99776e+08	5.72818e+08	4.31112e+08	1.36488e+08	5.68796e+07	1.83763e+08	1.84669e+08	5.68607e+07	1.7821e+08	8.90796e+07	9.0443e+07	3.39128e+08	7.53343e+08	9.77063e+07	9.87568e+07	1.06949e+08	3.17479e+08	1.08918e+08	1.08023e+08	1.13558e+08	1.22379e+08	5.23188e+08	5.61524e+07	1.14545e+08	1.14724e+09	3.03238e+08
833	M117T99	117.074	99.4737	1.66	3.07725e+08	3.52632e+08	3.67557e+08	3.46119e+08	3.29544e+08	3.4338e+08	8.9169e+08	9.59981e+08	6.00595e+08	8.56929e+08	8.62243e+08	1.24322e+09	2.44588e+09	2.19259e+09	2.12511e+09	1.87342e+09	1.99986e+09	1.97883e+09	2.44006e+09	2.56747e+09	2.4763e+09	2.41085e+09	2.07858e+09	2.25201e+09	1.55112e+09	1.52864e+09	1.57421e+09	1.53506e+09	1.5187e+09
834	M117T386	117.091	385.6	6.43	1.11582e+07	8.05941e+06	9.27491e+06	9.36742e+06	9.18095e+06	9.96379e+06	4.04954e+06	1.17603e+07	3.79212e+06	3.33046e+06	3.46928e+06	1.26132e+07	5.94801e+06	7.56243e+06	6.43467e+06	1.90599e+07	7.05997e+06	5.4026e+06	4.57314e+06	5.61841e+06	2.17446e+07	6.79035e+06	2.02998e+07	6.22982e+06	4.72257e+06	4.89344e+06	5.50938e+06	1.41441e+07	1.99506e+07
835	M117T33	117.138	32.9023	0.55	9.25412e+06	6.98993e+06	6.81163e+06	5.94748e+06	5.29755e+06	8.59376e+06	6.13806e+06	7.64448e+06	7.99463e+06	8.17994e+06	7.42594e+06	8.3944e+06	7.54267e+06	8.40901e+06	9.64763e+06	1.59253e+07	8.29013e+06	9.23257e+06	8.49504e+06	1.35697e+07	8.12176e+06	9.15369e+06	1.02195e+07	8.46818e+06	9.53946e+06	8.36746e+06	8.0983e+06	8.95521e+06	1.3426e+07
836	M118T34	117.959	33.9339	0.57	2.87496e+06	5.3434e+06	8.01367e+06	7.08911e+06	4.92357e+06	1.81519e+06	1.82028e+06	5.71232e+06	7.74506e+06	6.17827e+06	2.31712e+06	6.40195e+06	1.57911e+06	8.47938e+06	1.346e+06	5.87684e+06	1.88284e+06	1.96991e+06	2.34583e+06	5.29433e+06	5.35335e+06	8.02369e+06	8.84046e+06	1.98479e+06	9.84258e+06	5.3237e+06	7.26614e+06	1.84302e+06	2.21264e+06
837	M118T76	118.035	76.3716	1.27	4.11758e+08	4.61331e+08	4.25119e+08	4.36662e+08	4.72672e+08	4.46658e+08	4.90173e+08	4.90442e+08	4.90421e+08	4.59004e+08	4.62697e+08	4.8669e+08	4.12224e+08	4.3191e+08	4.41057e+08	4.37888e+08	4.3056e+08	4.37504e+08	5.0387e+08	5.09689e+08	5.29483e+08	5.43573e+08	4.82083e+08	5.51936e+08	4.99161e+08	4.86626e+08	5.05219e+08	4.86368e+08	4.92492e+08
838	M118T103	118.058	102.691	1.71	3.68452e+08	9.63827e+06	1.18248e+07	3.52598e+08	3.41341e+08	3.34556e+08	3.79486e+07	6.02036e+07	4.57145e+07	4.6865e+07	5.12229e+07	3.48869e+07	8.82916e+07	3.07532e+08	3.73857e+08	9.2295e+08	3.52918e+08	1.23042e+08	8.45754e+07	7.39391e+07	5.33767e+08	1.58047e+08	4.20531e+08	7.63506e+07	5.48231e+07	7.01346e+07	2.14453e+08	5.83533e+07	9.56759e+07
839	M118T347	118.065	346.768	5.78	7.19568e+07	6.27894e+07	7.287e+07	5.99786e+07	7.6147e+07	6.50442e+07	6.21709e+07	8.36371e+07	5.60991e+07	5.84436e+07	5.10983e+07	5.89523e+07	4.09572e+07	4.39101e+07	4.37432e+07	4.71886e+07	4.16652e+07	4.07436e+07	4.17641e+07	4.52341e+07	3.76682e+07	4.94538e+07	4.54438e+07	4.92372e+07	5.23194e+07	5.51394e+07	5.6411e+07	5.99069e+07	5.48052e+07
840	M118T584	118.065	583.821	9.73	1.79272e+08	1.86268e+08	1.71337e+08	1.53681e+08	1.70594e+08	1.51733e+08	5.83618e+07	5.27762e+07	6.63275e+07	6.4299e+07	5.40712e+07	5.74002e+07	2.99097e+07	3.197e+07	3.35255e+07	4.10001e+07	3.51639e+07	3.91743e+07	2.29099e+07	6.33906e+07	2.51913e+07	2.64832e+07	3.36252e+07	2.89145e+07	7.6298e+07	6.98395e+07	7.55947e+07	7.02252e+07	7.65781e+07
841	M118T237	118.065	237.344	3.96	5.81467e+07	4.95835e+07	6.2885e+07	4.9589e+07	6.26586e+07	6.52426e+07	4.16647e+07	8.38997e+07	5.60792e+07	7.03825e+07	8.85982e+07	8.4918e+07	9.62962e+07	8.14097e+07	6.55619e+07	7.4709e+07	8.08562e+07	6.53496e+07	7.06352e+07	8.7403e+07	7.98953e+07	7.64283e+07	5.4753e+07	7.43925e+07	4.38202e+07	7.63675e+07	5.88818e+07	8.26461e+07	6.55593e+07
842	M118T408	118.065	407.982	6.8	1.85304e+08	1.98032e+08	1.92158e+08	1.90939e+08	1.93519e+08	1.88877e+08	1.18163e+08	1.18525e+08	1.17745e+08	2.01149e+08	1.078e+08	1.99193e+08	5.54588e+07	5.60287e+07	5.76404e+07	6.1461e+07	5.37913e+07	5.96414e+07	4.7429e+07	5.39173e+07	4.9382e+07	5.46338e+07	5.2619e+07	5.38431e+07	1.60336e+08	1.028e+08	1.04861e+08	1.19497e+08	1.11556e+08
843	M118T94	118.058	94.1114	1.57	1.32296e+07	1.47556e+07	1.30042e+08	1.25165e+07	1.6712e+07	1.70908e+07	2.72102e+07	3.02411e+07	2.59597e+07	2.8357e+07	4.88493e+07	3.31253e+07	4.15441e+07	1.45099e+08	1.48271e+08	5.67789e+07	1.46872e+08	5.46985e+07	1.92497e+08	5.33551e+07	2.61749e+08	2.67041e+08	1.87382e+07	4.13902e+07	5.21342e+07	6.34821e+07	2.29587e+08	2.99739e+07	3.50205e+07
844	M118T389	118.065	388.672	6.48	3.09082e+07	3.65181e+07	3.48249e+07	3.78643e+07	3.44522e+07	3.91464e+07	3.73963e+07	3.95678e+07	3.35341e+07	1.30206e+07	4.49709e+07	1.59418e+07	2.25239e+07	2.39875e+07	2.14304e+07	2.24364e+07	2.45898e+07	2.13106e+07	2.4554e+07	2.5441e+07	2.41402e+07	2.83998e+07	2.5166e+07	2.4219e+07	1.70309e+07	3.1404e+07	3.0062e+07	1.15159e+07	3.14639e+07
845	M118T99	118.075	99.4075	1.66	7.63446e+07	2.28489e+07	8.88688e+07	7.44915e+07	8.16984e+07	2.10252e+07	1.1522e+08	6.53481e+07	4.83986e+07	2.40997e+08	6.98561e+07	8.90636e+07	1.62813e+08	8.46983e+07	1.60277e+08	1.31095e+08	1.62642e+08	1.39523e+08	1.86184e+08	2.00739e+08	2.08072e+08	1.88327e+08	1.77593e+08	1.83054e+08	1.87494e+08	1.2e+08	1.0928e+08	1.20881e+08	1.15228e+08
846	M118T107	118.086	106.762	1.78	1.87056e+09	1.88932e+09	1.91062e+09	1.7763e+09	1.81413e+09	1.82516e+09	5.92568e+09	5.81137e+09	4.57992e+09	5.5028e+09	5.38986e+09	7.81776e+09	4.06095e+09	5.28493e+09	4.8643e+09	5.07458e+09	4.49241e+09	4.1161e+09	2.37446e+09	2.85261e+09	2.74659e+09	2.96149e+09	2.80586e+09	2.90366e+09	3.63244e+09	3.54534e+09	3.86384e+09	5.37211e+09	3.88751e+09
847	M118T146	118.086	146.268	2.44	9.23651e+08	9.34515e+08	9.4427e+08	8.52737e+08	9.00327e+08	8.68699e+08	2.49894e+09	2.22744e+09	2.06134e+09	2.3339e+09	2.19538e+09	3.24622e+09	1.8958e+09	2.25222e+09	2.33908e+09	2.24168e+09	2.07457e+09	1.93932e+09	1.11746e+09	1.33448e+09	1.27241e+09	1.3677e+09	1.25251e+09	1.35299e+09	1.81377e+09	1.65435e+09	1.75215e+09	1.67618e+09	1.97844e+09
848	M118T125	118.086	124.825	2.08	5.99877e+08	5.27777e+08	5.50037e+08	7.96489e+08	5.25334e+08	4.55576e+08	1.68022e+09	3.50646e+08	1.14714e+09	1.39348e+09	1.28592e+09	2.19356e+09	1.19031e+09	1.43035e+09	2.08141e+09	1.37636e+09	1.20075e+09	1.25537e+09	8.32281e+08	8.47167e+08	8.44391e+08	8.60648e+08	8.4071e+08	1.24122e+09	1.13532e+09	1.06105e+09	1.08313e+09	2.27799e+08	1.14081e+09
849	M118T93	118.086	93.2043	1.55	5.34067e+08	5.14231e+08	5.18765e+08	5.24282e+08	5.23841e+08	5.11225e+08	2.00494e+08	2.05495e+08	1.00767e+09	7.5559e+08	7.20466e+08	7.91468e+08	6.08665e+08	6.81973e+08	6.55239e+08	6.97347e+08	6.37539e+08	5.85598e+08	8.00166e+08	1.88123e+09	1.0568e+09	1.09673e+09	1.30925e+09	9.94984e+08	2.42747e+08	9.32827e+08	9.4875e+08	2.26771e+08	8.51882e+08
850	M119T69	118.942	68.9447	1.15	1.46407e+07	1.25454e+07	9.69194e+06	1.24286e+07	1.31242e+07	1.56353e+07	1.67617e+07	1.08851e+07	2.9684e+07	1.34114e+07	3.37226e+07	1.31756e+07	2.1426e+07	2.00194e+07	1.20694e+07	9.10974e+06	1.36691e+07	3.41088e+06	2.84386e+06	3.04513e+07	1.31728e+07	8.85882e+06	2.88526e+07	2.97963e+06	2.06329e+07	9.772e+06	3.48072e+07	1.16489e+07	1.44083e+07
851	M119T209	119.034	208.719	3.48	9.16688e+06	8.84229e+06	1.06904e+07	8.15234e+06	9.25759e+06	1.13969e+07	8.27061e+06	8.34207e+06	6.32508e+06	1.05252e+07	6.77967e+06	9.89355e+06	3.82461e+07	2.8178e+07	2.09818e+07	3.03306e+07	2.4552e+07	8.16604e+06	2.21173e+07	2.82475e+07	2.9947e+07	3.30608e+07	1.92896e+07	2.17402e+07	1.99697e+07	1.03731e+07	9.88838e+06	9.26869e+06	1.59858e+07
852	M119T76	119.035	76.4614	1.27	5.46352e+07	6.2936e+07	5.43205e+07	5.19621e+07	5.47415e+07	6.12231e+07	6.51983e+07	5.83742e+07	6.02144e+07	3.56103e+07	5.4411e+07	5.86102e+07	5.15529e+07	5.45198e+07	5.88007e+07	5.42554e+07	5.08198e+07	5.44848e+07	6.76456e+07	5.99351e+07	6.9595e+07	6.33283e+07	6.30466e+07	6.15768e+07	5.85471e+07	5.95781e+07	5.74163e+07	6.29754e+07	3.08467e+07
853	M119T217	119.049	216.585	3.61	4.66184e+07	5.50736e+07	5.56295e+07	5.01097e+07	5.12455e+07	5.59845e+07	3.89463e+07	4.10244e+07	3.19839e+07	3.42e+07	2.70422e+07	4.09144e+07	2.68554e+07	2.47942e+07	2.54828e+07	2.85709e+07	1.35282e+07	2.38772e+07	3.40641e+07	3.42154e+07	4.54151e+07	6.04574e+07	4.20976e+07	4.74525e+07	4.30724e+07	4.37097e+07	3.57051e+07	4.37399e+07	4.70687e+07
854	M119T474	119.049	474.419	7.91	6.97583e+07	7.37947e+07	6.88199e+07	7.13267e+07	6.60436e+07	6.95415e+07	1.09326e+06	4.60396e+07	8.64608e+07	6.71394e+07	5.61396e+07	5.36115e+07	3.87633e+07	3.90177e+07	3.53331e+07	3.92514e+07	4.04355e+07	4.56425e+07	3.47488e+07	2.99052e+07	2.99727e+07	3.3714e+07	1.90662e+06	5.2942e+07	1.24067e+06	1.30331e+06	5.23239e+07	5.79385e+07	952273
855	M119T666	119.049	666.167	11.1	6.57503e+06	6.33984e+06	6.71885e+06	7.34688e+06	7.10923e+06	6.54183e+06	6.37961e+06	6.45168e+06	6.55918e+06	6.65807e+06	6.52257e+06	6.6492e+06	6.16434e+06	7.0804e+06	7.41314e+06	7.53379e+06	7.51555e+06	5.91813e+06	7.28488e+06	4.62988e+06	1.22397e+07	4.52866e+06	6.68e+06	6.50236e+06	8.4047e+06	4.30019e+06	6.56279e+06	6.9937e+06	6.55646e+06
856	M119T554	119.085	554.04	9.23	2.21162e+07	2.02423e+07	2.38685e+07	2.43766e+07	2.33602e+07	2.17744e+07	1.95118e+07	1.8369e+07	1.56078e+07	1.51461e+07	1.57955e+07	1.738e+07	1.28137e+07	1.44611e+07	1.60566e+07	1.3649e+07	1.43749e+07	1.35564e+07	1.16214e+07	1.42546e+07	1.43062e+07	1.64695e+07	1.89969e+07	1.80237e+07	5.27477e+07	1.62439e+07	1.59994e+07	2.08485e+07	2.25425e+07
857	M119T809	119.085	808.605	13.48	2.20068e+07	1.63224e+07	1.64799e+07	1.89311e+07	1.94799e+07	1.69148e+07	2.27594e+07	2.11953e+07	2.15324e+07	3.06081e+07	1.72921e+07	1.66601e+07	2.71001e+07	1.672e+07	2.64462e+07	1.53701e+07	2.72074e+06	1.34099e+07	2.5362e+07	1.51216e+07	1.71023e+07	1.76491e+07	2.08052e+07	2.04698e+07	2.17186e+07	1.79836e+07	2.14576e+07	2.01896e+07	2.77741e+07
858	M119T533	119.085	533.098	8.88	2.27909e+07	1.69577e+07	1.94152e+07	1.91584e+07	1.84781e+07	1.90799e+07	3.06052e+06	1.15654e+07	2.47793e+06	3.33504e+06	2.22191e+07	1.28527e+07	1.68877e+06	2.6816e+06	2.5323e+06	2.04052e+06	1.85012e+06	2.16338e+06	1.98028e+06	1.47502e+07	2.69106e+06	2.07855e+06	1.72657e+06	9.06497e+06	3.04129e+06	1.75932e+07	1.10267e+07	1.77823e+07	1.38542e+07
859	M119T460	119.085	460.085	7.67	2.61523e+06	1.77158e+06	2.9695e+06	1.76535e+06	2.67292e+06	1.14587e+07	2.79781e+06	2.90567e+06	3.12579e+06	9.88757e+06	1.02747e+07	1.11964e+07	1.77647e+06	1.21372e+06	2.39068e+06	2.08287e+06	2.47292e+06	8.28431e+06	8.82846e+06	1.2493e+07	1.14825e+07	3.26965e+06	6.32236e+07	2.42622e+06	1.66047e+07	1.55378e+07	2.14898e+06	1.15839e+07	1.1918e+07
860	M119T107	119.09	106.769	1.78	1.01682e+08	1.08692e+08	1.0017e+08	9.57274e+07	9.89323e+07	9.42733e+07	3.32377e+08	2.90415e+08	2.44889e+08	2.76616e+08	2.98194e+08	4.35005e+08	2.2421e+08	2.63692e+08	2.57569e+08	2.85596e+08	2.43284e+08	2.14913e+08	1.27516e+08	1.4999e+08	1.40525e+08	1.59874e+08	1.48049e+08	1.45221e+08	1.93676e+08	1.88633e+08	2.00298e+08	2.13744e+08	2.11447e+08
861	M119T146	119.089	146.293	2.44	4.43698e+07	5.07096e+07	4.32916e+07	4.54391e+07	4.02694e+07	4.15461e+07	1.37465e+08	1.2029e+08	1.10781e+08	1.31442e+08	1.15982e+08	1.7034e+08	1.00056e+08	1.20237e+08	1.28137e+08	1.12637e+08	1.08222e+08	9.37132e+07	5.35965e+07	7.41376e+07	6.36327e+07	7.26001e+07	6.30525e+07	6.58463e+07	1.00925e+08	9.17477e+07	9.8291e+07	8.6817e+07	1.02413e+08
862	M119T125	119.089	124.615	2.08	2.84557e+07	2.55889e+07	2.37659e+07	6.71154e+06	7.32044e+06	6.44262e+06	6.48592e+07	1.46527e+07	3.24288e+07	1.67332e+07	1.48083e+07	8.12936e+07	2.17786e+07	7.26002e+07	9.06511e+07	7.01623e+07	6.69874e+07	7.27486e+07	8.1953e+06	1.20382e+07	2.22963e+07	2.69584e+07	2.05884e+07	3.45681e+07	5.52883e+07	5.26194e+07	5.31197e+07	1.18212e+07	4.0872e+07
863	M120T206	120.022	206.115	3.44	5.61777e+07	1.01736e+08	1.14504e+08	1.046e+08	1.36946e+07	8.07619e+06	1.07039e+08	9.51497e+07	5.24474e+07	1.27192e+08	1.78514e+07	1.68658e+07	3.49221e+07	1.32015e+08	1.5487e+08	1.49411e+08	1.53233e+08	2.11851e+08	1.25981e+08	2.68759e+07	1.165e+08	1.25501e+08	1.54904e+08	1.28063e+08	1.33798e+08	1.19979e+08	1.19536e+08	1.09969e+08	1.4312e+08
864	M120T63	120.024	63.0627	1.05	2.11007e+08	2.09481e+08	2.07852e+08	2.11033e+08	2.16028e+08	6.72211e+07	2.10953e+08	1.03919e+08	2.16749e+08	1.07846e+08	9.09324e+07	2.08757e+08	1.22771e+08	1.04829e+08	1.04524e+08	1.25787e+08	5.83401e+07	2.07614e+08	2.13173e+08	2.04295e+08	1.97147e+08	1.03421e+08	1.93999e+08	1.07625e+08	1.40951e+08	2.20634e+08	1.09093e+08	9.65112e+07	1.16707e+08
865	M120T825	120.025	825.035	13.75	4.07893e+07	4.12788e+07	2.40311e+07	9.15326e+06	7.82392e+06	3.26505e+07	6.84093e+07	9.38776e+06	2.30573e+07	7.6575e+06	2.97816e+07	2.8552e+07	5.27348e+07	7.80874e+06	9.20459e+06	2.56734e+07	2.86544e+07	4.48625e+07	9.58035e+06	3.56667e+07	5.59739e+07	2.70504e+07	8.4163e+06	3.52713e+07	5.80796e+07	7.12579e+06	6.00296e+07	7.58189e+06	3.39585e+07
866	M120T299	120.022	299.008	4.98	2.40001e+07	4.13314e+07	2.45929e+07	2.15909e+08	3.75802e+08	2.55042e+07	7.501e+07	8.08792e+07	8.45558e+07	1.65875e+08	5.93748e+07	2.86688e+08	2.20637e+07	6.10867e+07	2.79615e+08	2.29807e+07	1.02762e+08	2.42481e+08	2.35666e+07	5.48345e+07	2.60157e+08	1.14249e+08	2.20482e+07	9.17239e+07	2.3101e+07	9.07606e+07	6.16543e+07	2.39666e+08	2.11097e+08
867	M120T787	120.025	787.244	13.12	9.71753e+06	3.76589e+07	7.92777e+07	4.04282e+07	3.42626e+07	2.84577e+07	8.85268e+06	4.09633e+07	4.84416e+07	1.65689e+08	3.04313e+07	3.52302e+07	8.55981e+06	8.86526e+06	3.60647e+07	7.3865e+06	3.45686e+07	8.49946e+06	4.88713e+07	3.99249e+07	3.31079e+07	3.41544e+07	2.32565e+07	8.72426e+06	3.65378e+07	3.00299e+07	9.3304e+06	7.30529e+06	7.32182e+07
868	M120T833	120.025	832.587	13.88	6.70604e+06	2.04269e+07	5.60525e+06	3.48764e+07	2.35786e+07	6.35559e+06	4.98625e+06	5.38735e+06	1.95322e+07	2.52187e+07	2.24699e+07	2.84794e+07	2.00125e+07	7.01295e+06	4.42282e+07	1.84574e+07	7.138e+06	2.97062e+07	2.62834e+07	7.30123e+06	6.79533e+06	1.83697e+07	2.62769e+07	3.3572e+07	7.35012e+06	5.95495e+07	6.99674e+06	4.91814e+07	7.21969e+06
869	M120T802	120.025	802.105	13.37	5.72028e+06	2.94022e+07	5.87177e+06	3.02529e+07	6.80792e+06	4.23301e+07	2.57433e+07	7.13268e+06	2.00883e+07	6.09717e+06	3.97921e+07	2.84513e+07	3.06641e+07	6.22669e+06	2.97309e+07	4.01611e+07	3.44259e+07	6.47669e+06	4.21377e+07	5.48874e+06	2.73295e+07	4.73933e+07	6.19144e+06	6.0063e+07	6.38156e+06	3.17225e+07	3.78127e+07	2.73486e+07	7.04491e+06
870	M120T347_1	120.038	346.771	5.78	9.5406e+06	8.12472e+06	1.03308e+07	8.47276e+06	9.23637e+06	7.77557e+06	7.05923e+06	4.62703e+06	7.47476e+06	5.03103e+06	4.58206e+06	8.39912e+06	5.24409e+06	4.62768e+06	5.15787e+06	4.26978e+06	5.70147e+06	4.89148e+06	5.34193e+06	4.91345e+06	5.61962e+06	5.24301e+06	6.4245e+06	4.58345e+06	6.82868e+06	4.38759e+06	4.31331e+06	6.96905e+06	4.39619e+06
871	M120T76	120.047	75.5821	1.26	2.3481e+07	1.84108e+07	1.84611e+07	1.94051e+07	1.91627e+07	1.90059e+07	2.24049e+07	2.58334e+07	2.23345e+07	1.912e+07	1.88721e+07	2.43684e+07	2.9907e+07	3.36207e+07	1.91645e+07	3.78418e+07	4.06606e+07	2.79693e+07	4.76913e+07	5.4148e+07	4.87372e+07	5.16685e+07	6.2327e+07	5.85745e+07	2.01929e+07	1.94579e+07	2.37628e+07	1.79459e+07	2.22501e+07
872	M120T91	120.065	91.4013	1.52	6.30523e+08	6.28077e+08	6.43606e+08	6.07036e+08	6.18354e+08	6.43179e+08	1.25364e+09	1.1451e+09	1.03741e+09	1.18698e+09	1.10169e+09	1.55523e+09	8.14298e+08	9.50864e+08	9.33539e+08	1.03239e+09	9.30847e+08	8.36406e+08	7.11878e+08	7.12948e+08	7.99497e+08	7.73382e+08	7.30022e+08	7.41772e+08	9.08241e+08	8.88441e+08	9.52377e+08	9.18908e+08	9.40687e+08
873	M120T173	120.065	173.095	2.88	3.3587e+07	3.32987e+07	3.79418e+07	3.27859e+07	3.75689e+07	3.58149e+07	3.47004e+07	3.3134e+07	2.82162e+07	3.1032e+07	3.83964e+07	3.83082e+07	2.48642e+07	2.79826e+07	2.05271e+07	2.34529e+07	2.2182e+07	2.2723e+07	2.72635e+07	3.49619e+07	3.05434e+07	2.78234e+07	2.37561e+07	2.79808e+07	3.14886e+07	3.08276e+07	3.00897e+07	3.04707e+07	2.98095e+07
874	M120T104	120.065	103.544	1.73	4.50587e+07	4.65087e+07	5.39512e+07	3.6652e+07	3.9055e+07	9.57833e+06	3.1661e+07	1.0348e+07	4.09765e+07	4.36948e+07	4.66423e+07	9.24544e+07	3.64418e+06	6.7866e+06	7.97165e+06	7.34523e+06	2.11237e+07	2.66365e+07	2.66076e+07	3.52329e+07	6.41466e+06	5.13261e+06	3.60037e+06	3.61935e+06	2.59672e+07	3.74377e+07	3.04863e+07	4.09961e+06	2.15728e+07
875	M120T347_2	120.081	346.77	5.78	6.54357e+09	6.10008e+09	6.37422e+09	5.83386e+09	6.79638e+09	6.11548e+09	5.85746e+09	5.21988e+09	4.99434e+09	5.3758e+09	4.80709e+09	5.51945e+09	3.58876e+09	3.78673e+09	4.04885e+09	4.29453e+09	3.67897e+09	3.73528e+09	3.77443e+09	3.82293e+09	3.63558e+09	4.67803e+09	4.4397e+09	4.3184e+09	4.95905e+09	4.99807e+09	4.8882e+09	5.38801e+09	5.1092e+09
876	M120T369	120.081	369.37	6.16	2.7164e+08	2.54633e+08	2.683e+08	3.03974e+08	2.16794e+08	2.32268e+08	2.63559e+08	1.97867e+08	1.87322e+08	2.69814e+08	1.7517e+08	2.77364e+08	1.60185e+08	1.47283e+08	1.33983e+08	1.78839e+08	1.17444e+08	1.37783e+08	1.45941e+08	1.20024e+08	1.43595e+08	2.42496e+08	1.45674e+08	2.06173e+08	1.56076e+08	1.68928e+08	1.77108e+08	1.71612e+08	1.70843e+08
877	M120T328	120.081	327.938	5.47	4.18559e+07	4.21432e+07	1.0909e+07	4.45866e+07	4.84421e+07	4.56452e+07	2.70934e+07	2.62115e+07	2.24346e+07	6.07951e+06	2.33478e+07	2.76695e+07	1.63334e+07	1.94712e+07	1.78013e+07	1.80766e+07	1.63079e+07	1.71694e+07	3.84573e+06	1.7023e+07	1.63104e+07	1.97676e+07	1.76876e+07	1.81408e+07	2.34046e+07	2.37413e+07	2.54637e+07	2.54026e+07	2.31386e+07
878	M120T498	120.081	497.585	8.29	3.45885e+07	2.31002e+07	2.65424e+07	2.31438e+07	2.66341e+07	2.46283e+07	3.37027e+06	1.64867e+07	1.66253e+07	1.77055e+07	1.60117e+07	2.16783e+07	1.24308e+07	1.42924e+07	1.37515e+07	1.34876e+07	1.11324e+07	1.18317e+07	1.2401e+07	1.58694e+07	1.34812e+07	1.7399e+07	1.77777e+06	1.44952e+07	2.65676e+06	2.25767e+06	1.69274e+07	1.73528e+07	2.10817e+06
879	M120T518	120.081	517.835	8.63	1.46732e+07	3.54077e+06	3.6688e+06	1.96152e+07	1.54826e+07	1.32398e+07	1.5779e+07	1.59161e+07	1.62138e+07	1.80017e+07	1.63897e+07	2.16299e+07	1.97932e+07	1.83281e+07	2.59087e+07	2.03393e+07	1.84783e+07	1.99997e+07	1.89305e+07	1.82138e+07	1.80378e+07	1.73634e+07	2.14711e+07	1.80795e+07	1.79002e+07	1.77829e+07	1.52557e+07	2.0083e+07	1.75777e+07
880	M120T429	120.08	429.39	7.16	1.76773e+07	1.73033e+07	1.61896e+07	4.30548e+06	1.4942e+07	1.8722e+07	1.21152e+07	2.88495e+06	1.02014e+07	2.98575e+06	2.93367e+06	1.51173e+07	1.86618e+06	2.76443e+06	2.44623e+06	8.26772e+06	2.17601e+06	9.029e+06	7.85936e+06	7.16801e+06	2.24198e+06	2.91624e+06	2.32405e+07	7.35344e+06	1.23996e+07	1.23482e+07	2.82973e+06	1.22156e+07	2.54891e+07
881	M120T437	120.08	436.978	7.28	1.42267e+07	1.27995e+07	1.57019e+07	3.63814e+06	1.29362e+07	7.3159e+06	5.05209e+06	2.79922e+07	1.25282e+07	3.6891e+06	2.6473e+07	4.23246e+06	3.35559e+06	2.10909e+07	2.8031e+06	1.19012e+07	2.41219e+06	1.00196e+07	1.27056e+07	1.37283e+07	1.98671e+07	2.39114e+07	1.22492e+06	1.3555e+07	4.60815e+06	863070	2.55927e+07	1.23837e+07	849000
882	M120T409	120.08	408.794	6.81	2.22083e+07	1.05734e+07	2.18818e+07	3.31596e+06	1.94256e+07	2.61356e+07	1.26681e+07	1.01747e+07	3.85747e+07	3.87197e+06	3.22564e+06	5.13572e+07	3.05156e+06	9.98018e+06	2.64155e+06	2.95091e+06	2.51861e+06	7.14074e+06	2.98355e+07	9.84281e+06	7.21022e+06	3.42464e+06	8.23486e+06	1.26434e+07	1.07905e+07	8.87225e+06	1.87397e+07	3.37224e+06	2.76022e+06
883	M120T393	120.08	393.401	6.56	2.98822e+07	1.77003e+07	1.67216e+07	4.53681e+06	2.05479e+07	3.43382e+07	1.11342e+07	1.14888e+07	3.1187e+06	3.82979e+06	1.10173e+07	3.6851e+06	2.49065e+06	2.80782e+06	2.9181e+06	9.0018e+06	2.59214e+06	1.96602e+07	2.41821e+06	1.12442e+07	2.19382e+06	9.31128e+06	1.05479e+07	1.25287e+07	1.50347e+07	1.21168e+07	3.85042e+06	1.22293e+07	3.03108e+06
884	M120T348	120.123	347.918	5.8	9.39634e+06	7.95632e+06	9.26183e+06	8.28974e+06	1.6156e+09	7.32876e+06	9.71702e+06	1.30851e+09	5.93749e+06	6.67866e+06	6.93032e+06	1.31728e+09	8.5625e+08	5.04392e+06	6.42539e+06	5.46533e+06	8.15226e+08	4.67305e+06	4.58027e+06	5.5874e+06	5.12876e+06	1.10958e+09	5.65026e+06	1.06888e+09	6.34646e+06	1.1853e+09	7.69672e+06	8.22645e+06	6.44555e+06
885	M120T347_3	120.25	346.768	5.78	9.12274e+06	8.4845e+06	1.7659e+06	1.07214e+06	1.30304e+06	8.06204e+06	321032	2.77955e+06	1.98734e+06	8.62443e+06	4.51208e+06	2.20563e+06	6.28403e+06	5.16203e+06	5.35341e+06	5.25505e+06	4.74435e+06	6.7732e+06	861631	6.48627e+06	862935	7.46536e+06	1.87373e+06	6.8658e+06	1.75275e+06	7.87802e+06	2.09177e+06	2.25285e+06	1.09745e+06
886	M121T238_1	120.893	237.505	3.96	4.4069e+07	5.10228e+07	6.05863e+07	4.40626e+07	8.18201e+07	9.62825e+07	7.37564e+07	8.44038e+07	5.73437e+07	7.36981e+07	1.98134e+07	5.52856e+07	1.1344e+08	8.27806e+07	5.72347e+07	5.25529e+07	9.36826e+07	7.41565e+07	8.11946e+07	8.75571e+07	6.99561e+07	1.01972e+08	5.78988e+07	7.99944e+07	6.26607e+07	8.7408e+07	7.18708e+07	7.74068e+07	7.51581e+07
887	M121T79	120.981	78.5143	1.31	3.7325e+06	3.93528e+06	2.30619e+07	3.88494e+06	2.65001e+07	2.21105e+07	4.63403e+07	4.89205e+07	4.7331e+07	3.55263e+07	4.64413e+07	6.42015e+07	4.70897e+07	5.73783e+07	4.73423e+07	4.13076e+07	4.74084e+07	4.45883e+07	6.97494e+07	6.676e+07	6.02077e+07	6.0641e+07	6.3102e+07	6.67674e+07	4.19712e+07	3.91207e+07	6.26265e+07	4.20819e+07	5.23932e+07
888	M121T54	120.981	54.1117	0.9	6.53797e+06	5.37676e+06	2.48949e+07	6.64379e+06	5.61039e+07	6.1731e+06	5.08164e+07	1.74519e+07	3.53526e+07	1.99277e+07	2.37011e+07	6.2038e+06	2.2895e+07	5.0044e+07	3.98445e+07	1.98869e+07	4.76823e+07	2.03334e+07	1.76997e+07	1.47471e+07	3.39653e+07	3.54186e+07	3.42049e+07	1.3186e+07	2.05499e+07	1.4885e+07	3.89837e+07	1.50658e+07	1.99246e+07
889	M121T233	120.981	233.341	3.89	8.98034e+06	1.56752e+07	8.60782e+06	2.11475e+07	1.65743e+07	3.32566e+07	8.46875e+06	1.48928e+07	3.22817e+07	1.89043e+07	2.31853e+07	1.22758e+07	1.00324e+07	1.20674e+07	1.92393e+07	1.32926e+07	9.76024e+06	2.94773e+07	4.1042e+07	1.63518e+07	1.30754e+07	1.05591e+07	4.15973e+07	1.72604e+07	1.83059e+07	1.32439e+07	2.1436e+07	2.09336e+07	3.19937e+07
890	M121T278	120.981	277.917	4.63	1.4789e+07	3.07132e+07	2.19796e+07	1.87503e+07	7.57548e+07	2.21114e+07	6.7736e+06	7.19647e+06	2.56336e+07	6.3341e+06	6.69044e+06	3.85527e+07	5.84183e+06	3.2036e+07	7.12503e+06	2.57529e+07	2.12749e+07	6.64322e+06	3.86391e+07	7.11316e+06	2.0314e+07	6.55085e+06	2.81145e+07	2.67437e+07	4.24515e+07	6.27291e+06	2.19636e+07	1.80624e+07	2.67212e+07
891	M121T237_1	121.021	237.387	3.96	3.43571e+07	3.34625e+07	3.32851e+07	3.0667e+07	3.0201e+07	4.12623e+07	3.68429e+07	5.04515e+07	3.4836e+07	4.5941e+07	5.5813e+07	5.95322e+07	4.93986e+07	4.07272e+07	4.04563e+07	4.03319e+07	4.08476e+07	3.28001e+07	5.07052e+07	6.29737e+07	5.90602e+07	5.22574e+07	3.75876e+07	4.71748e+07	3.05076e+07	4.58374e+07	4.28321e+07	5.17096e+07	4.58895e+07
892	M121T103	121.028	102.783	1.71	3.92508e+07	2.10272e+07	3.23749e+07	2.94742e+07	3.49948e+07	2.78224e+07	4.91938e+07	5.6341e+07	4.34933e+07	5.15492e+07	5.56138e+07	5.92072e+07	3.03594e+07	2.67783e+07	3.001e+07	2.97975e+07	2.91725e+07	2.61936e+07	3.21069e+07	2.94996e+07	5.37104e+07	5.94854e+06	7.67155e+06	2.99662e+07	3.67597e+07	4.09868e+07	3.24128e+07	3.64896e+07	3.23048e+07
893	M121T480	121.028	479.637	7.99	2.31392e+06	2.50221e+06	2.59501e+06	1.18445e+07	1.22072e+07	1.05874e+07	1.24075e+07	1.339e+07	1.41664e+07	1.31236e+07	1.48308e+07	1.44421e+07	1.74048e+07	1.78272e+07	1.98094e+07	2.09825e+07	1.83006e+07	2.55755e+07	1.8268e+07	1.83245e+07	3.74749e+06	1.92031e+07	1.61416e+07	3.72873e+06	1.52205e+07	1.6812e+07	1.5286e+07	1.29484e+07	1.83773e+07
894	M121T491	121.028	491.088	8.18	2.0577e+07	3.21602e+07	3.07093e+07	1.86906e+07	2.03227e+07	1.99929e+07	1.49532e+06	1.43888e+07	2.38279e+06	9.78343e+06	3.68541e+06	1.50956e+07	2.51124e+06	3.51292e+06	3.4623e+06	3.28309e+06	1.56132e+07	3.11333e+06	1.58262e+07	1.95518e+07	1.86492e+07	1.81849e+07	2.69476e+06	1.89965e+07	2.4041e+06	1.89002e+06	1.60869e+07	1.38663e+07	2.44511e+06
895	M121T554	121.028	554.372	9.24	2.99076e+07	3.43761e+07	3.20982e+07	3.15404e+07	3.02853e+07	2.60597e+07	1.65791e+07	1.49856e+07	4.0376e+06	1.56589e+07	1.24248e+07	1.4347e+07	2.6345e+06	3.7138e+06	2.75749e+06	3.70194e+06	3.19243e+06	3.05883e+06	3.23265e+06	2.74245e+06	2.90459e+06	2.72282e+06	3.19984e+06	3.68495e+06	1.77039e+07	1.69858e+07	7.0243e+07	1.88947e+07	1.82519e+07
896	M121T146	121.032	145.554	2.43	5.45065e+07	5.54654e+07	5.00489e+07	4.95484e+07	5.1657e+07	4.70086e+07	3.24142e+07	2.61558e+07	3.16121e+07	3.14265e+07	2.81844e+07	2.56113e+07	2.91582e+07	3.03839e+07	2.91181e+07	3.55409e+07	3.19719e+07	3.77624e+07	2.29276e+07	7.6689e+06	2.26557e+07	2.56147e+07	2.62244e+07	2.43337e+07	3.61579e+07	3.36056e+07	3.19696e+07	2.85523e+07	3.46994e+07
897	M121T219	121.049	218.605	3.64	1.46345e+08	2.36339e+08	2.43805e+08	1.7355e+08	2.42959e+08	1.19785e+08	9.14847e+07	1.073e+08	8.9619e+07	1.13875e+08	2.00061e+08	8.97069e+07	1.08463e+08	9.89919e+07	8.88912e+07	1.81837e+08	9.86265e+07	1.78793e+08	7.3165e+07	1.15771e+08	1.46531e+08	9.4882e+07	1.93969e+08	2.12383e+08	2.11432e+08	2.04695e+08	1.17406e+08	1.9527e+08	2.05204e+08
898	M121T237_2	121.065	237.387	3.96	2.38073e+10	2.35831e+10	2.52474e+10	2.50835e+10	2.68904e+10	2.82121e+10	2.96503e+10	3.66866e+10	2.52026e+10	3.4479e+10	4.11143e+10	4.25884e+10	4.14333e+10	3.72805e+10	2.64275e+10	2.73971e+10	3.09863e+10	2.84256e+10	3.58433e+10	4.03349e+10	3.81121e+10	3.41751e+10	2.41103e+10	3.45574e+10	3.17045e+10	4.0814e+10	3.05619e+10	3.2193e+10	3.50208e+10
899	M121T348	121.064	347.899	5.8	4.10615e+07	3.30264e+07	3.73416e+07	1.24424e+08	4.00069e+07	4.90305e+07	5.16927e+07	1.16068e+08	3.05607e+07	5.18916e+07	4.63587e+07	8.13697e+07	7.91107e+07	4.9978e+07	3.95797e+07	3.70439e+07	3.9581e+07	3.27029e+07	8.16393e+07	4.77637e+07	8.07401e+07	4.09353e+07	3.22028e+07	4.22773e+07	4.29564e+07	4.85792e+07	5.95896e+07	4.12879e+07	4.58814e+07
900	M121T322	121.065	321.905	5.37	6.18715e+07	2.55465e+07	3.0724e+07	2.94808e+07	1.02291e+08	7.47785e+07	1.01055e+08	1.20207e+08	2.8658e+07	1.16712e+08	1.99291e+08	1.74852e+08	8.07958e+08	2.16753e+08	5.7978e+07	5.41447e+08	1.59222e+08	1.43764e+08	2.07399e+08	1.77182e+08	7.93151e+08	1.13728e+08	6.60488e+07	1.22397e+08	1.84295e+08	1.49143e+08	7.44331e+07	1.77342e+08	7.67289e+07
901	M121T364	121.064	363.756	6.06	2.54192e+07	6.20167e+06	6.62632e+06	6.18227e+06	2.9513e+07	7.08257e+06	2.64726e+07	8.04995e+06	6.62996e+06	2.45429e+07	2.95148e+07	8.01668e+06	3.47194e+07	2.45239e+07	2.7267e+07	2.74027e+07	6.44717e+06	2.56344e+07	6.43409e+06	3.55738e+07	2.93368e+07	4.37513e+07	3.12255e+07	3.67953e+07	3.06676e+07	2.15428e+07	2.68203e+07	2.63935e+07	6.76302e+06
902	M121T214	121.065	214.487	3.57	6.73773e+09	6.33527e+09	7.35393e+09	7.484e+09	7.27006e+09	7.37068e+09	7.17221e+09	8.6858e+09	7.81134e+09	2.49016e+09	2.53348e+09	2.16481e+09	1.05673e+10	1.06897e+10	8.85951e+09	8.21058e+09	1.03401e+10	8.20371e+09	2.38106e+09	1.06311e+10	1.02266e+10	7.45836e+09	8.3648e+09	8.18816e+09	8.68709e+09	2.21187e+09	9.28385e+09	8.81257e+09	2.27101e+09
903	M121T375	121.064	374.502	6.24	2.00904e+07	5.40004e+06	7.2086e+06	6.33675e+06	3.06674e+07	5.28506e+07	3.5264e+07	1.24555e+08	7.79441e+06	2.63617e+07	1.87782e+07	4.02631e+07	1.5214e+07	2.02717e+07	1.71312e+07	1.78392e+07	6.66747e+06	1.31045e+07	5.57463e+06	2.83238e+07	2.68559e+07	2.87601e+07	2.75346e+07	6.46741e+06	2.78341e+07	3.4404e+07	3.45312e+07	2.41433e+07	5.56338e+07
904	M121T404	121.064	404.389	6.74	1.25034e+07	4.67746e+06	3.85266e+06	4.84069e+06	1.47545e+07	4.43983e+06	1.68796e+07	4.55339e+07	4.6028e+06	1.20482e+07	2.2683e+07	1.44671e+07	1.94373e+07	6.26742e+06	9.88247e+06	1.73384e+07	6.37675e+06	1.17477e+07	5.97587e+06	4.87903e+07	3.16608e+07	6.06955e+06	2.28028e+07	6.43029e+06	2.87502e+07	3.61224e+07	3.12841e+07	6.14248e+06	2.05754e+07
905	M121T277	121.064	276.712	4.61	7.03807e+07	1.35036e+07	1.74282e+07	1.63779e+07	1.30712e+08	8.67295e+07	1.03722e+08	1.09897e+08	1.65696e+07	8.23909e+07	8.55114e+07	1.05998e+08	2.42733e+07	1.11413e+08	7.04828e+07	1.79052e+07	2.04226e+07	1.13065e+08	2.12725e+07	2.60295e+07	2.17213e+07	9.35753e+07	8.40303e+07	8.68872e+07	1.9139e+07	1.04049e+08	8.67084e+07	7.12599e+07	1.49919e+08
906	M121T413	121.064	413.127	6.89	1.85384e+07	4.40066e+06	5.23421e+06	3.93858e+06	1.81738e+07	5.02255e+06	1.0865e+07	6.64213e+06	5.07753e+06	2.64171e+07	2.05597e+07	2.30698e+07	1.77061e+07	1.08262e+08	1.5903e+07	1.70037e+07	5.45753e+06	1.47563e+07	5.70146e+06	6.03583e+06	1.53281e+07	2.74409e+07	4.75964e+06	8.2949e+07	1.17907e+07	4.22864e+06	1.82409e+07	5.06867e+07	1.46786e+07
907	M121T298	121.064	298.329	4.97	5.64339e+07	1.2497e+07	1.39338e+07	1.32962e+07	4.59513e+07	6.86871e+07	8.75803e+07	1.5148e+08	1.32869e+07	8.17725e+07	9.94332e+07	8.59913e+07	1.99448e+07	8.84484e+07	4.19992e+07	1.32524e+07	1.80728e+07	4.58014e+07	1.73707e+07	5.6505e+07	1.88893e+07	5.69181e+07	3.65644e+07	4.68131e+07	6.45403e+08	7.7942e+07	1.02705e+08	5.28941e+07	1.72263e+08
908	M121T92	121.069	91.7293	1.53	6.36737e+06	2.19673e+07	2.57076e+07	2.02799e+07	2.34887e+07	2.43769e+07	1.27493e+07	1.17968e+07	9.51843e+06	3.93258e+07	1.12623e+07	1.61013e+07	2.82335e+07	8.03207e+06	3.53768e+07	1.01973e+07	4.63161e+07	3.07942e+07	1.97621e+07	2.30483e+07	2.37377e+07	2.52073e+07	1.81809e+07	3.02701e+07	4.088e+07	28430847	9.92264e+06	7.89326e+06	3.188e+07
909	M121T347	121.084	346.77	5.78	5.57649e+08	4.93473e+08	5.66118e+08	4.82486e+08	5.73493e+08	5.35455e+08	4.94208e+08	4.38476e+08	4.10778e+08	4.43588e+08	3.97217e+08	4.49929e+08	3.03326e+08	3.2776e+08	3.33807e+08	3.59358e+08	2.98728e+08	3.08139e+08	3.15792e+08	3.19945e+08	3.01264e+08	3.8861e+08	3.60948e+08	3.59113e+08	4.29396e+08	4.16782e+08	4.27023e+08	4.54293e+08	4.40635e+08
910	M121T522	121.101	522.066	8.7	1.71756e+07	1.54257e+07	1.60492e+07	1.43384e+07	1.69247e+07	1.64806e+07	1.53948e+07	1.5017e+07	1.25319e+07	1.55845e+07	1.73432e+07	1.79172e+07	2.88071e+06	3.51114e+06	2.87071e+06	2.80616e+06	2.82171e+06	2.8807e+06	7.65689e+06	1.34545e+07	3.35099e+06	2.37307e+07	2.98413e+06	3.22204e+06	1.38853e+07	1.28731e+07	1.21116e+07	1.20073e+07	3.37746e+06
911	M121T237_3	121.108	237.387	3.96	2.82251e+07	2.8015e+07	3.43291e+07	3.44215e+07	4.02393e+07	3.72134e+07	4.20503e+07	5.50846e+07	3.33833e+07	4.41578e+07	6.16286e+07	5.78944e+07	5.91719e+07	5.65357e+07	3.48465e+07	3.84282e+07	4.55262e+07	4.11075e+07	5.23917e+07	4.3783e+07	5.0548e+07	5.497e+07	3.07708e+07	5.74692e+07	3.97802e+07	4.25466e+07	3.85588e+07	4.74469e+07	4.79929e+07
912	M121T238_2	121.236	237.505	3.96	3.58736e+07	3.83893e+07	4.95806e+07	1.99693e+07	3.84883e+07	7.71089e+07	6.66993e+07	5.25253e+07	2.90215e+07	4.15008e+07	1.05842e+07	7.09018e+07	7.42318e+07	6.61646e+07	4.49515e+07	2.90835e+07	5.76705e+07	4.7233e+07	3.60006e+07	5.8934e+07	7.05655e+07	6.76448e+07	3.62788e+07	5.57094e+07	5.29753e+07	7.20853e+07	4.58208e+07	3.60599e+07	5.65953e+07
913	M122T36	122.036	36.2546	0.6	3.63599e+07	3.93357e+07	3.05849e+07	3.55238e+07	3.69637e+07	3.52607e+07	4.93939e+07	4.39616e+07	4.45534e+07	3.36481e+07	3.63776e+07	4.12881e+07	3.74663e+07	4.37014e+07	4.2977e+07	3.13042e+07	4.35554e+07	2.90401e+07	3.00556e+07	2.84241e+07	2.51101e+07	3.32166e+07	3.17821e+07	4.46649e+07	6.15068e+07	3.26951e+07	3.01674e+07	3.31227e+07	2.15758e+07
914	M122T68	122.036	67.95	1.13	7.2861e+06	9.96527e+06	1.39344e+07	1.0087e+07	1.88576e+07	3.3007e+06	3.77774e+06	2.30292e+07	1.25647e+07	3.72688e+07	2.90504e+06	3.33841e+06	1.04322e+07	1.94041e+07	2.69919e+06	3.32092e+06	3.00716e+06	2.85151e+06	3.0037e+06	3.10123e+06	3.47527e+06	1.27521e+07	3.43767e+06	2.53847e+06	3.62548e+06	3.64519e+07	1.79295e+07	3.55246e+06	9.44536e+06
915	M122T237	122.068	237.384	3.96	2.03169e+09	2.03215e+09	2.19377e+09	2.19894e+09	2.32564e+09	2.41161e+09	2.55594e+09	3.15505e+09	2.14138e+09	2.93307e+09	3.54813e+09	3.42005e+09	3.39617e+09	3.17298e+09	2.28616e+09	2.36276e+09	2.69571e+09	2.42985e+09	3.06301e+09	3.45183e+09	3.27212e+09	2.97283e+09	2.08116e+09	2.98932e+09	2.72776e+09	3.53399e+09	2.6354e+09	2.75475e+09	2.80112e+09
916	M122T215	122.068	215.156	3.59	5.61639e+08	5.43051e+08	6.12181e+08	6.39707e+08	6.17724e+08	6.14947e+08	7.23404e+08	7.36825e+08	6.51837e+08	1.0704e+07	1.45797e+07	7.23021e+08	9.98157e+08	9.16252e+08	6.15821e+08	7.02571e+08	8.89297e+08	4.02721e+08	1.59544e+07	9.00718e+08	8.92442e+08	6.29299e+08	7.29309e+08	8.57288e+08	7.40546e+08	1.67739e+08	7.79175e+08	7.38575e+08	7.84723e+08
917	M122T388	122.096	388.394	6.47	6.55247e+08	6.93118e+08	6.73114e+08	6.87477e+08	7.49754e+08	7.78265e+08	8.13323e+08	9.37764e+08	6.86436e+08	8.59121e+08	1.07941e+09	9.4669e+08	9.33728e+08	9.03447e+08	7.6748e+08	7.13509e+08	8.09781e+08	7.56702e+08	9.04287e+08	1.11818e+09	1.04044e+09	9.69809e+08	7.69798e+08	9.33633e+08	8.21022e+08	7.86552e+08	8.69953e+08	8.39835e+08	8.91065e+08
918	M122T443	122.096	443.309	7.39	1.50869e+07	1.24166e+07	1.08751e+07	4.8048e+06	8.76227e+06	1.52007e+07	1.00222e+06	4.39698e+06	4.19767e+06	1.4697e+07	1.19911e+07	9.27627e+06	1.33124e+07	3.69462e+06	7.08141e+06	3.41301e+06	1.45953e+07	3.40196e+06	1.72925e+07	4.02594e+06	3.75e+06	1.51769e+07	1.83832e+06	1.52998e+07	1.72711e+06	1.13632e+06	1.0194e+07	1.02848e+07	2.41442e+06
919	M122T424	122.096	424.38	7.07	1.14188e+07	3.31212e+07	1.09256e+07	4.66671e+06	1.55941e+07	1.62004e+07	1.52298e+07	4.39616e+06	3.8753e+06	4.39162e+06	1.30373e+07	4.54461e+06	1.05826e+07	5.31394e+06	3.93091e+06	1.96308e+07	4.04356e+06	4.97749e+06	4.528e+06	4.28387e+06	1.60134e+07	4.76174e+06	2.09239e+07	1.25947e+07	4.47608e+06	3.8302e+07	4.14286e+07	4.4919e+06	1.18749e+07
920	M122T269	122.499	268.823	4.48	7.53035e+06	3.65256e+06	8.33811e+06	1.53135e+07	1.56531e+07	2.06335e+07	7.53039e+06	3.86549e+06	1.33579e+07	3.76953e+06	4.6766e+06	1.08495e+07	1.29721e+07	3.87591e+06	7.04722e+06	4.17633e+06	1.51139e+07	1.34967e+07	3.22359e+06	1.35427e+07	4.22144e+06	1.48582e+07	2.83941e+06	1.21681e+07	1.47756e+07	1.55792e+07	3.59067e+06	4.24163e+06	1.70637e+07
921	M123T76_1	122.537	76.3142	1.27	1.35764e+08	1.34691e+08	1.05216e+08	8.49046e+07	1.45503e+08	1.31625e+08	1.49931e+08	1.48123e+08	1.58792e+08	1.41576e+08	1.4834e+08	1.66541e+08	1.38106e+08	1.50389e+08	1.61614e+08	1.7204e+08	1.79561e+08	1.65968e+08	2.10344e+08	2.1562e+08	2.16901e+08	2.48148e+08	2.16811e+08	2.31328e+08	1.24891e+08	1.37854e+08	1.70467e+08	1.40567e+08	1.76558e+08
922	M123T35	122.547	35.0001	0.58	3.59102e+07	3.62109e+07	4.14962e+07	3.67859e+07	3.99988e+07	4.67505e+07	3.90493e+07	4.24327e+07	4.74012e+07	4.51084e+07	3.85745e+07	3.97141e+07	3.94568e+07	4.17311e+07	3.70514e+07	3.68246e+07	3.66741e+07	4.42446e+07	4.00689e+07	4.04383e+07	4.25765e+07	4.17929e+07	4.32362e+07	4.28074e+07	4.15312e+07	4.19298e+07	3.48561e+07	4.40577e+07	1.01361e+07
923	M123T506	122.547	505.855	8.43	6.398e+07	5.2124e+07	9.04253e+07	4.31872e+07	1.0882e+07	6.26299e+07	6.91518e+07	1.27194e+07	6.4934e+07	1.38325e+07	5.93309e+07	8.68449e+07	1.50588e+07	6.1194e+07	6.74215e+07	6.03242e+07	6.06932e+07	1.53199e+07	1.58672e+07	6.78787e+07	1.52864e+07	1.53453e+07	1.4425e+07	1.59084e+07	6.62379e+07	6.39424e+07	3.29583e+07	5.97446e+07	3.38167e+07
924	M123T606	122.547	606.477	10.11	9.53996e+07	9.11349e+07	8.78212e+07	7.07832e+07	2.20819e+08	2.72608e+07	2.45217e+07	7.88912e+07	7.26013e+07	2.39121e+07	1.1797e+08	2.86027e+07	7.98982e+07	8.94077e+07	1.15554e+08	1.72537e+08	9.34893e+07	2.94433e+08	1.09103e+08	8.41828e+07	1.20601e+08	2.512e+07	1.57554e+08	2.69797e+07	2.70464e+07	1.75077e+08	9.36981e+07	6.70611e+07	2.87298e+07
925	M123T85_1	122.748	84.6287	1.41	2.25432e+06	1.06081e+07	8.82669e+06	9.45439e+06	9.1934e+06	1.31563e+07	7.6989e+06	9.95623e+06	7.87909e+06	8.65955e+06	9.25649e+06	8.61718e+06	7.32212e+06	1.03359e+07	1.11697e+07	1.14225e+07	7.70238e+06	834110	2.02649e+06	5.81503e+06	7.4554e+06	8.60027e+06	8.43407e+06	8.58813e+06	8.43395e+06	8.13697e+06	7.59965e+06	1.28001e+06	4.95816e+06
926	M123T85_2	122.88	84.6272	1.41	4.07276e+06	5.84024e+06	5.59785e+06	5.12227e+06	5.68691e+06	5.26217e+06	5.45477e+06	4.55768e+06	5.45009e+06	4.74655e+06	5.14958e+06	5.16574e+06	4.48926e+06	4.62238e+06	5.81017e+06	5.92725e+06	4.75606e+06	5.34774e+06	4.53303e+06	5.62264e+06	5.07148e+06	5.17316e+06	4.51295e+06	4.73613e+06	4.7393e+06	5.17406e+06	2.68578e+06	3.80511e+06	5.4359e+06
927	M123T85_3	122.924	84.6266	1.41	4.4606e+09	4.35851e+09	4.24898e+09	4.185e+09	4.28621e+09	4.35707e+09	3.84116e+09	3.94513e+09	4.06575e+09	4.12736e+09	3.89889e+09	3.69397e+09	3.8066e+09	3.71104e+09	3.87004e+09	3.78704e+09	3.70654e+09	3.81092e+09	3.67649e+09	3.77853e+09	3.76417e+09	3.47755e+09	3.66287e+09	3.65909e+09	3.9814e+09	3.8734e+09	3.57522e+09	3.98037e+09	4.03609e+09
928	M123T85_4	122.968	84.6266	1.41	4.92627e+06	3.44424e+06	6.21641e+06	4.323e+06	5.44701e+06	6.20142e+06	5.35447e+06	3.80807e+06	4.91408e+06	4.92235e+06	3.4411e+06	4.79278e+06	4.8167e+06	6.34221e+06	2.90263e+06	4.68471e+06	4.16573e+06	4.83418e+06	4.53437e+06	4.83571e+06	5.0658e+06	5.19882e+06	5.77661e+06	4.30366e+06	4.7667e+06	4.14736e+06	4.54574e+06	4.95825e+06	5.80206e+06
929	M123T76_2	123.014	76.4358	1.27	1.64353e+09	1.47405e+08	1.36378e+08	1.41913e+08	1.44434e+08	1.41489e+08	1.49732e+08	1.60193e+08	1.47397e+08	1.4442e+08	1.53942e+08	1.32591e+08	1.10527e+08	1.33618e+08	1.38447e+08	1.32346e+08	1.36991e+08	1.23133e+08	1.45429e+08	1.47486e+08	1.59484e+08	1.54027e+08	1.58867e+08	9.33645e+07	1.50838e+08	1.37037e+08	1.45558e+08	1.39372e+08	1.52894e+08
930	M123T76_3	123.04	76.4315	1.27	6.57318e+09	6.84065e+09	6.88395e+09	6.95198e+09	7.29779e+09	7.26751e+09	7.97829e+09	8.06836e+09	7.93554e+09	7.69466e+09	7.10021e+09	7.56611e+09	6.4219e+09	6.7997e+09	6.87717e+09	7.03081e+09	6.82143e+09	6.9502e+09	7.97988e+09	8.1917e+09	8.10561e+09	8.81844e+09	8.04026e+09	8.60882e+09	8.06233e+09	7.50716e+09	7.86317e+09	8.15113e+09	7.67731e+09
931	M123T36_1	123.04	36.3921	0.61	1.63149e+08	1.33758e+08	1.53912e+08	1.55077e+08	1.08356e+08	1.74482e+08	1.52133e+08	1.48172e+08	1.62579e+08	1.742e+08	1.63028e+08	1.45513e+08	1.32619e+08	1.77173e+08	1.02175e+08	1.64959e+08	1.30467e+08	1.37072e+08	1.41343e+08	1.43635e+08	1.16058e+08	1.51503e+08	1.3969e+08	1.7556e+08	1.50816e+08	1.31628e+08	1.67928e+08	1.30359e+08	2.65457e+08
932	M123T60	123.04	60.1095	1	7.87369e+07	6.5657e+07	8.63639e+07	9.60146e+07	1.01673e+08	1.05475e+08	5.64923e+07	9.32472e+07	6.99306e+07	1.82866e+07	8.04833e+07	1.35998e+07	7.25498e+07	7.9875e+07	1.69711e+07	1.66974e+07	6.381e+07	5.41675e+07	1.71596e+07	6.21083e+07	1.65487e+07	6.68216e+07	5.56627e+07	6.74639e+07	1.57535e+07	9.52344e+07	5.45242e+07	6.59902e+07	1.69466e+07
933	M123T505	123.04	505.431	8.42	1.18567e+08	1.8803e+08	1.7489e+08	1.77077e+08	1.92928e+08	1.64747e+08	2.79397e+08	1.93682e+08	1.91733e+08	2.62844e+08	1.8629e+08	2.59569e+08	2.13968e+08	2.30719e+08	1.96084e+08	2.28098e+08	2.10701e+08	2.40477e+08	2.20091e+08	2.45349e+08	2.16239e+08	2.33305e+08	2.16204e+08	4.886e+07	1.92978e+08	2.12182e+08	2.01005e+08	1.21385e+08	2.09714e+08
934	M123T485	123.04	485.479	8.09	8.20963e+07	1.90831e+07	8.15553e+07	8.66333e+07	7.76015e+07	7.46906e+07	1.82463e+07	8.98629e+07	7.53817e+07	9.14368e+07	1.02409e+08	1.04649e+08	2.20234e+07	1.95861e+07	1.85961e+08	1.11326e+08	9.93484e+07	2.11889e+07	1.12032e+08	2.14622e+07	1.10377e+08	2.188e+07	2.32159e+07	2.16439e+07	9.58768e+07	1.7158e+07	1.84139e+07	1.04658e+08	8.62231e+07
935	M123T531	123.04	531.258	8.85	2.84073e+08	5.06049e+07	2.15326e+08	4.62926e+07	2.02868e+08	2.15806e+08	1.88378e+08	1.21272e+08	3.35723e+08	5.06668e+07	2.99544e+08	3.64547e+08	1.93489e+08	2.05792e+08	1.30372e+08	1.83894e+08	4.48233e+08	3.38513e+08	3.43061e+08	1.8552e+08	1.69874e+08	4.38931e+08	4.7812e+07	7.46731e+08	5.84387e+08	4.31522e+07	1.14816e+08	1.4835e+08	2.13779e+08
936	M123T421	123.04	420.774	7.01	9.42393e+07	2.76884e+08	9.83716e+08	1.34887e+08	6.78078e+08	1.11029e+08	1.03591e+08	1.01028e+08	1.05687e+08	4.71302e+08	3.01628e+08	6.32077e+08	1.03435e+09	2.50027e+08	5.43879e+08	8.33709e+08	1.36932e+08	1.08389e+09	1.44254e+08	7.62276e+07	1.12338e+09	1.70345e+08	4.00806e+08	1.08887e+09	2.36852e+08	1.03398e+08	6.97e+07	1.50379e+08	1.03131e+08
937	M123T466	123.04	465.575	7.76	1.07047e+08	3.92255e+08	1.11753e+08	8.10836e+07	8.23368e+07	1.3547e+08	2.99389e+08	4.85583e+07	1.39971e+08	2.43635e+08	1.39367e+08	2.28995e+08	4.26664e+08	2.64915e+08	1.46896e+08	1.18785e+08	1.00785e+08	2.98185e+08	2.89765e+08	4.28009e+08	1.33756e+08	4.16276e+08	2.75718e+08	2.88989e+08	2.67693e+08	2.42312e+08	2.84644e+08	1.33143e+08	1.78055e+08
938	M123T550	123.04	550.295	9.17	1.84271e+08	2.65616e+08	9.56688e+07	3.42603e+07	1.41679e+08	1.50814e+08	2.8239e+08	3.32719e+07	1.55076e+08	1.55058e+08	1.1289e+08	3.44767e+07	2.72109e+08	1.69542e+08	2.17621e+08	2.97965e+08	1.98406e+08	1.48957e+08	1.30902e+08	1.81541e+08	1.48918e+08	3.85603e+07	3.58327e+07	3.37418e+07	3.31351e+07	2.25541e+08	1.32697e+08	1.53246e+08	3.50779e+07
939	M123T357	123.04	356.862	5.95	5.18944e+07	1.16942e+08	1.08964e+08	2.80489e+08	2.07506e+08	2.17896e+08	1.05658e+08	1.27449e+08	1.24062e+08	4.88265e+07	5.75094e+08	2.35017e+08	4.98935e+07	2.01515e+08	2.00937e+08	1.97773e+08	5.06032e+07	5.20624e+07	1.71183e+08	4.84036e+07	5.18277e+07	1.86453e+08	4.75808e+07	5.04616e+07	2.31569e+08	1.62169e+08	1.8658e+08	2.25998e+08	1.36869e+08
940	M123T690	123.04	689.942	11.5	1.94959e+08	4.87731e+07	3.8043e+08	2.06258e+08	1.43745e+08	1.7332e+08	1.58504e+08	2.43129e+08	1.61658e+08	5.41457e+08	4.59478e+08	4.24246e+08	4.79395e+08	1.08914e+08	1.50384e+08	1.61557e+08	3.93176e+07	1.59424e+08	5.14953e+07	2.4676e+08	1.79609e+07	2.1577e+07	1.36202e+08	1.68591e+08	1.83844e+08	5.58499e+08	1.67845e+08	1.36818e+08	1.42227e+08
941	M123T492	123.04	492.336	8.21	7.22744e+07	1.58207e+07	6.58053e+07	7.2746e+07	5.79372e+07	8.21466e+07	1.42067e+07	1.78925e+07	7.7933e+07	1.49065e+07	8.44201e+07	1.85863e+07	2.07899e+07	2.10038e+08	1.63962e+07	8.5575e+07	1.1186e+08	8.15969e+07	8.88087e+07	1.77302e+07	9.68621e+07	1.89432e+07	1.57956e+07	1.80943e+07	1.50915e+07	1.62068e+07	8.0244e+07	7.29275e+07	1.95831e+07
942	M123T659	123.04	658.954	10.98	1.7263e+08	1.95226e+08	5.43291e+07	1.71613e+08	1.78792e+08	1.91433e+08	1.68214e+08	2.32232e+08	5.01142e+07	4.61144e+07	2.53023e+08	1.55222e+08	1.22906e+08	5.16997e+08	4.91932e+07	3.04422e+08	1.10469e+09	5.24686e+07	5.55522e+07	1.67734e+08	1.2458e+09	4.24442e+07	5.54222e+07	4.89025e+07	2.66911e+08	3.38202e+07	8.53351e+08	4.70547e+07	5.16636e+07
943	M123T608	123.04	607.731	10.13	2.28183e+08	5.26168e+07	1.38295e+08	5.08377e+07	4.89887e+07	2.58769e+08	4.71694e+07	1.20751e+08	4.85828e+07	1.76857e+08	4.89981e+07	2.30785e+08	2.57776e+08	2.27588e+08	1.61672e+08	2.26874e+08	5.0691e+07	5.52908e+07	1.9117e+08	2.42188e+08	5.23046e+07	1.69018e+08	4.78022e+07	1.74521e+08	2.66619e+08	1.73707e+08	5.03822e+07	2.26342e+08	3.2406e+08
944	M123T734	123.04	734.39	12.24	1.86566e+08	4.15251e+07	1.58228e+08	1.75345e+08	8.87815e+07	1.00698e+08	1.45117e+08	1.01199e+08	3.67986e+07	3.50092e+07	3.95085e+07	3.63687e+07	2.20602e+08	1.95487e+08	2.43849e+07	3.8854e+07	7.68032e+08	1.69631e+08	5.68531e+08	7.73482e+07	1.02471e+08	3.55319e+07	4.47741e+07	4.37785e+08	3.93766e+07	1.86702e+08	3.56105e+07	3.57359e+07	4.18482e+07
945	M123T520	123.04	520.162	8.67	7.96114e+07	1.177e+08	1.20348e+08	1.25034e+08	1.27083e+08	1.28281e+08	3.45574e+07	1.33059e+08	2.91912e+07	3.4291e+07	3.10812e+07	2.97227e+07	3.44753e+07	3.06787e+07	1.69433e+08	1.54143e+08	3.21299e+07	2.98028e+07	3.36936e+07	4.91707e+07	9.1018e+07	3.29322e+07	3.76534e+07	3.42536e+07	3.54705e+07	3.21478e+08	1.31331e+08	1.33985e+08	3.44707e+07
946	M123T722	123.04	721.646	12.03	1.93986e+08	3.39136e+08	4.09487e+07	2.76196e+08	1.46688e+08	4.05698e+07	1.09233e+08	1.18136e+08	4.09309e+07	3.98864e+07	1.4132e+08	3.90064e+07	4.11787e+07	3.43141e+07	2.34665e+08	1.55725e+08	3.95816e+07	1.20781e+08	4.17314e+07	1.08653e+08	1.07501e+08	6.68179e+08	5.01914e+08	4.32263e+07	3.72551e+08	1.53989e+08	5.20856e+08	2.95637e+08	4.34329e+07
947	M123T566	123.04	566.256	9.44	1.65609e+08	5.76363e+07	5.55768e+07	2.34454e+08	6.15756e+07	2.14308e+08	3.27189e+08	4.57706e+08	5.73287e+07	2.03093e+08	6.01435e+07	2.01084e+08	2.96605e+08	3.1883e+08	2.16804e+08	3.37749e+08	1.58677e+08	5.32778e+07	2.55811e+08	1.88897e+08	2.03601e+08	5.78285e+07	6.12508e+07	4.27752e+08	2.78123e+08	1.40107e+08	5.83214e+07	2.71133e+08	6.39875e+07
948	M123T578	123.04	577.745	9.63	6.85685e+07	6.91797e+07	6.16174e+08	6.99958e+07	6.51588e+08	6.78604e+07	6.72356e+07	7.31804e+07	6.95701e+07	1.32286e+08	8.05537e+08	1.57934e+08	1.91335e+08	6.57003e+07	6.5716e+07	6.89577e+07	1.71463e+08	6.74363e+07	7.33643e+07	1.59076e+08	1.45878e+08	5.49949e+08	8.18686e+08	6.40777e+07	4.56173e+07	1.60707e+08	6.40986e+08	6.03585e+07	6.17249e+08
949	M123T671	123.04	671.304	11.19	1.58262e+08	5.589e+07	2.43022e+08	3.27465e+08	1.66219e+08	3.09423e+08	1.97349e+08	1.69987e+08	5.25516e+07	5.07182e+07	5.20605e+07	2.03955e+08	1.6948e+08	3.42508e+07	2.12444e+08	1.26903e+08	4.93041e+07	2.84888e+08	5.97005e+07	2.486e+08	4.21418e+07	2.95608e+07	6.46402e+08	2.09774e+08	3.1175e+08	3.63438e+07	5.72788e+07	3.44651e+08	2.59399e+08
950	M123T217	123.044	216.6	3.61	1.46515e+08	1.28966e+08	1.5151e+08	1.35171e+08	1.46646e+08	1.42632e+08	1.1495e+08	1.07455e+08	1.08626e+08	1.26372e+08	1.55565e+08	1.13641e+08	7.55246e+07	8.07459e+07	8.69171e+07	1.04431e+08	7.64226e+07	7.61436e+07	1.45059e+08	1.4492e+08	1.57142e+08	2.0321e+08	1.19624e+08	3.67389e+07	1.21923e+08	1.42251e+08	1.06399e+08	1.26451e+08	1.30403e+08
951	M123T384	123.04	384.06	6.4	1.20471e+08	1.2023e+08	4.35715e+07	1.43831e+08	4.5887e+07	1.42641e+08	3.98234e+07	1.1881e+08	3.24402e+08	1.21091e+08	4.30072e+07	2.86733e+07	4.17706e+07	2.16708e+08	1.55428e+08	3.86349e+07	5.24604e+08	4.59229e+07	1.8954e+08	7.54116e+08	4.11752e+07	1.12076e+08	4.30578e+07	4.56851e+07	1.61748e+08	1.44195e+08	1.74896e+08	1.4355e+08	1.47199e+08
952	M123T103	123.044	102.851	1.71	3.03667e+07	3.61076e+07	1.786e+07	4.88659e+07	4.34905e+07	4.77004e+07	3.32629e+07	4.48909e+07	4.16489e+07	1.81761e+07	4.66363e+07	6.6879e+07	6.68048e+07	6.38263e+07	6.45929e+07	6.28353e+07	6.56135e+07	5.72153e+07	6.91038e+07	8.34471e+07	8.15386e+07	5.51223e+07	5.38848e+07	6.67971e+07	5.15559e+07	4.74727e+07	6.09932e+07	5.72351e+07	4.97253e+07
953	M123T155	123.055	155.47	2.59	3.06568e+07	3.32399e+07	2.8686e+07	4.60052e+07	2.52606e+07	5.70702e+07	3.9202e+07	4.21159e+07	2.94749e+06	3.53263e+06	3.70738e+07	5.49319e+07	5.19e+07	6.23637e+07	4.7885e+07	5.91847e+07	5.38338e+07	4.97864e+07	6.84786e+07	6.53221e+07	5.88375e+07	5.8298e+07	5.26703e+07	5.05879e+07	4.56881e+07	4.89177e+07	4.72907e+07	4.61791e+07	4.83192e+07
954	M123T66	123.055	66.1264	1.1	1.38306e+07	2.52944e+07	3.07003e+07	1.74778e+07	6.10668e+06	2.53451e+07	1.77681e+07	1.02679e+07	2.16458e+07	6.54598e+06	5.21611e+06	4.42227e+07	3.00667e+07	1.21457e+07	3.06094e+07	9.53023e+06	3.07992e+07	1.34432e+07	1.00135e+07	9.20812e+06	2.98162e+07	1.37248e+07	2.17068e+07	2.40617e+07	3.18981e+07	1.19639e+07	2.22514e+07	1.20218e+07	1.7705e+07
955	M123T54	123.055	54.3652	0.91	8.95508e+06	2.35248e+07	4.7686e+07	9.2008e+06	1.58836e+07	2.42972e+07	1.97294e+07	2.03024e+07	2.38155e+07	7.36389e+06	8.40928e+06	3.88854e+07	1.7179e+07	2.10105e+07	2.18978e+07	6.35379e+07	2.18833e+07	1.36901e+07	1.89122e+07	1.35246e+07	2.18274e+07	8.87292e+06	2.01688e+07	2.02723e+07	2.19845e+07	9.34439e+06	2.32961e+07	6.74944e+06	1.8583e+07
956	M123T36_2	123.055	36.2023	0.6	7.92435e+06	5.08088e+06	2.0039e+07	9.67996e+06	1.8242e+07	1.83039e+07	1.85089e+07	1.88523e+07	4.24247e+06	1.92113e+07	6.97141e+06	1.98118e+07	1.72235e+07	2.64603e+07	8.61139e+06	1.57709e+07	2.97071e+07	1.11322e+07	1.82882e+07	1.57121e+07	1.5322e+07	1.67697e+07	1.50938e+07	6.48521e+06	4.96487e+06	8.42479e+06	5.54865e+06	8.39003e+06	6.88054e+06
957	M123T46	123.055	45.7218	0.76	8.78656e+06	1.79369e+07	1.99642e+07	1.28118e+07	1.68979e+07	2.60734e+07	1.4037e+07	1.622e+07	1.28502e+07	8.36734e+06	6.95053e+06	1.40582e+07	1.75952e+07	1.64533e+07	9.53888e+06	9.03491e+06	1.57098e+07	1.03771e+07	1.4792e+07	1.45948e+07	1.41027e+07	1.17495e+07	2.58442e+07	1.37877e+07	1.19202e+07	9.04598e+06	7.59432e+06	1.2337e+07	1.41812e+07
958	M123T237	123.07	237.387	3.96	5.27002e+08	9.10017e+07	8.50707e+07	1.16928e+08	1.78281e+08	1.21986e+08	1.29765e+08	1.3918e+08	1.32441e+08	1.11577e+08	1.55825e+08	1.36379e+08	1.5451e+08	1.59048e+08	1.05591e+08	1.0046e+08	1.14518e+08	9.50404e+07	1.19786e+08	1.52714e+08	1.70994e+08	1.20559e+08	9.54609e+07	1.23189e+08	1.40372e+08	1.18595e+08	1.08061e+08	1.15442e+08	1.30374e+08
959	M123T95	123.065	95.1097	1.59	2.19477e+07	8.05593e+07	1.51971e+08	1.02905e+08	9.61526e+07	9.76639e+07	1.2995e+07	1.78209e+07	1.68973e+07	1.29776e+08	6.67774e+07	1.15774e+08	1.26969e+07	7.30345e+07	1.56501e+07	6.68432e+07	6.58104e+07	1.32541e+07	1.21158e+07	1.12527e+07	1.33844e+07	1.02425e+07	1.45336e+07	1.02263e+07	7.86743e+07	1.66861e+07	6.08544e+07	1.54462e+07	6.85035e+07
960	M123T214	123.069	214.065	3.57	4.87654e+07	4.77789e+07	4.66948e+07	8.21028e+07	1.77436e+08	1.0188e+08	1.31417e+07	4.4527e+07	1.73446e+08	4.30725e+07	4.63093e+07	4.38894e+07	3.9396e+07	3.47433e+07	4.37415e+07	4.44324e+07	4.55147e+07	4.07523e+07	4.04963e+07	4.44203e+07	3.24237e+07	4.1585e+07	4.23466e+07	2.46006e+07	4.82169e+07	2.63452e+07	5.06617e+07	1.58762e+07	3.47748e+07
961	M123T470	123.08	470.418	7.84	1.66463e+07	1.56456e+07	2.05199e+07	1.17876e+07	1.58004e+07	1.7471e+07	1.1268e+07	1.73114e+07	3.53664e+07	1.35828e+07	4.35823e+07	1.23463e+07	1.57609e+07	1.66464e+07	1.49205e+07	1.70813e+07	1.49806e+07	1.58169e+07	1.59689e+07	1.74048e+07	1.14244e+07	5.17277e+07	1.08644e+07	1.20114e+07	1.27296e+07	1.26013e+07	3.17765e+07	2.96964e+07	1.06435e+07
962	M123T460	123.08	460.339	7.67	1.2153e+07	8.84422e+06	9.81816e+06	1.03446e+07	1.12256e+07	9.25084e+06	3.52945e+07	1.26568e+07	7.87097e+06	1.10023e+07	9.69141e+06	1.39431e+07	1.03217e+07	1.25187e+07	1.08661e+07	1.02925e+07	8.71209e+06	1.01443e+07	8.65918e+06	8.2219e+06	1.41112e+07	8.6123e+06	1.4851e+07	7.77154e+06	1.48347e+07	1.57681e+07	8.35634e+06	8.0591e+06	1.78045e+07
963	M123T388	123.099	388.221	6.47	5.59234e+07	5.70993e+07	2.16157e+07	6.02643e+07	6.282e+07	6.79457e+07	7.45081e+07	8.03481e+07	5.9076e+07	7.47864e+07	9.37737e+07	8.20077e+07	8.25161e+07	7.92256e+07	6.80049e+07	6.1879e+07	6.95672e+07	6.16902e+07	7.64666e+07	9.59412e+07	2.92456e+06	8.59953e+07	6.80708e+07	7.68681e+07	7.37075e+07	6.88436e+07	2.5348e+07	7.58754e+07	7.71066e+07
964	M123T85_5	123.1	84.6268	1.41	4.07401e+06	7.0198e+06	6.96909e+06	6.89978e+06	8.01049e+06	6.18504e+06	4.65041e+06	7.91365e+06	7.37883e+06	8.72629e+06	9.07155e+06	6.19565e+06	3.96971e+06	8.07643e+06	7.06903e+06	9.50388e+06	5.70717e+06	2.22998e+06	2.91713e+06	5.82994e+06	5.86142e+06	6.72954e+06	4.78064e+06	6.5149e+06	8.44187e+06	6.57103e+06	6.69437e+06	5.08808e+06	4.98387e+06
965	M124T268	123.518	268.2	4.47	4.0751e+08	4.27067e+08	4.48965e+08	4.67882e+08	5.19084e+08	5.02396e+08	2.213e+08	4.72284e+08	4.36603e+08	4.71638e+08	2.27885e+08	5.85537e+08	4.46464e+08	3.34374e+08	3.83472e+08	2.91484e+08	4.11422e+08	3.90026e+08	3.7158e+08	4.29191e+08	4.51062e+08	4.02632e+08	3.03656e+08	3.66876e+08	4.56326e+08	4.22938e+08	4.35951e+08	4.42803e+08	5.94432e+07
966	M124T226	123.518	226.195	3.77	2.2661e+08	2.31877e+08	2.11575e+08	1.99568e+08	2.27073e+08	3.1301e+08	5.13017e+07	2.1461e+08	1.99989e+08	5.04222e+07	2.37711e+08	2.23957e+08	2.32812e+08	1.86122e+08	2.09108e+08	1.87306e+08	1.82557e+08	2.62737e+08	2.59426e+08	1.83741e+08	4.41319e+07	2.31293e+08	2.08123e+08	2.05242e+08	2.69956e+08	2.11266e+08	1.71849e+08	1.91837e+08	1.91662e+08
967	M124T211_1	123.518	211.252	3.52	1.68848e+08	2.53394e+08	1.67017e+08	1.79841e+08	2.44533e+08	1.99749e+08	5.1716e+08	2.49115e+08	1.93371e+08	5.18982e+08	2.28735e+08	2.4923e+08	1.4527e+08	1.47176e+08	2.11995e+08	2.04405e+08	2.22526e+08	1.3084e+08	1.21981e+08	2.29458e+08	4.44621e+08	2.04104e+08	2.19576e+08	2.01538e+08	2.3902e+08	1.49271e+08	1.5286e+08	1.58786e+08	2.16207e+08
968	M124T88	123.594	88.0618	1.47	5.74255e+07	5.66599e+07	5.92656e+07	6.38464e+07	6.45065e+07	1.30643e+07	8.14113e+07	1.43594e+07	5.56678e+07	5.50613e+07	5.7605e+07	8.27751e+07	5.94716e+07	5.95899e+07	1.28316e+07	5.36072e+07	6.22612e+07	1.17583e+07	6.59316e+07	6.26746e+07	1.72163e+07	1.34044e+07	5.63843e+07	5.76834e+07	6.1128e+07	5.46491e+07	5.88515e+07	1.61855e+07	6.77897e+07
969	M124T269	124.019	269.136	4.49	2.15578e+07	2.62103e+07	2.8221e+07	1.48084e+07	3.59297e+07	1.66584e+07	1.53001e+07	3.39028e+07	1.6414e+07	2.27925e+07	1.99073e+07	4.07638e+07	9.78772e+06	3.08056e+07	1.31748e+07	1.62377e+07	2.90258e+07	1.56743e+07	2.11868e+07	2.99595e+07	1.3873e+07	2.29457e+07	2.1286e+07	1.3683e+07	3.19302e+07	3.13199e+07	3.31302e+07	2.09268e+07	2.18671e+07
970	M124T40	124.023	40.0776	0.67	1.31691e+08	8.63097e+06	1.07962e+07	2.28532e+06	6.50002e+06	1.55039e+08	1.68718e+08	8.47598e+06	7.34149e+06	1.42167e+08	4.44498e+06	8.0853e+06	1.19223e+08	1.24415e+08	1.24207e+08	4.83402e+06	1.36618e+08	1.04633e+07	1.30676e+08	4.62186e+06	1.20696e+08	7.37724e+06	1.39123e+07	7.53755e+06	5.77958e+06	6.66103e+07	1.06913e+08	1.08595e+07	1.98495e+07
971	M124T211_2	124.019	210.986	3.52	1.20287e+07	1.66803e+07	8.07922e+07	1.62526e+07	9.6792e+06	9.37523e+07	3.29754e+07	7.38094e+07	1.1403e+07	2.03359e+07	6.11496e+07	6.37692e+07	6.0546e+07	6.10502e+07	1.47186e+07	6.87494e+07	1.33162e+07	7.16536e+07	1.13143e+07	6.7975e+07	5.60456e+07	6.38453e+07	1.05879e+07	6.40885e+06	1.14352e+07	1.2298e+07	5.97422e+07	1.2621e+07	6.54053e+07
972	M124T76_1	124.024	76.2552	1.27	1.0012e+08	9.29534e+07	5.25389e+07	1.16898e+08	1.24769e+08	9.9827e+07	1.00342e+08	1.20799e+08	9.14431e+07	9.89308e+07	1.42567e+08	1.0271e+08	9.52407e+07	1.07142e+08	1.50286e+08	1.65885e+08	1.17349e+08	1.18999e+08	1.42646e+08	1.36313e+08	1.32377e+08	1.64741e+08	1.38069e+08	1.68576e+08	8.74144e+07	9.83544e+07	1.15429e+08	1.0691e+08	1.30203e+08
973	M124T49	124.023	49.2072	0.82	4.37875e+07	1.48889e+07	1.34084e+07	1.35027e+08	1.29374e+08	3.59097e+07	1.02277e+07	7.94468e+06	1.53631e+07	4.11722e+07	1.17175e+08	1.06788e+07	4.81813e+07	2.08726e+07	9.93918e+07	1.12146e+08	1.68344e+07	2.29031e+07	5.1739e+07	1.10323e+07	1.5092e+07	1.24993e+07	1.10613e+07	1.67352e+07	5.95839e+06	1.90859e+07	3.86705e+07	1.69233e+07	1.26218e+08
974	M124T76_2	124.04	76.4401	1.27	1.05142e+09	1.0687e+09	1.04467e+09	1.01705e+09	1.06592e+09	1.02235e+09	1.13423e+09	1.13223e+09	1.18942e+09	1.07501e+09	1.02756e+09	1.05901e+09	9.00759e+08	9.00536e+08	1.18942e+09	9.55558e+08	1.00029e+09	1.00126e+09	1.44129e+09	1.13379e+09	1.25867e+09	1.30556e+09	1.11827e+09	1.17481e+09	9.65442e+08	1.26397e+09	1.39839e+09	1.18482e+09	1.06701e+09
975	M124T104	124.039	103.58	1.73	4.83878e+08	6.37587e+08	1.21909e+09	5.9916e+08	7.06953e+08	7.53249e+08	6.58303e+08	5.55828e+08	7.05804e+08	6.59484e+08	1.05708e+09	5.15819e+08	4.66171e+08	4.83499e+08	5.32126e+08	5.1236e+08	4.22683e+08	5.07427e+08	5.5934e+08	5.45015e+08	4.47639e+08	4.35165e+08	6.00912e+08	4.91391e+08	3.98134e+08	4.07418e+08	4.87696e+08	4.96326e+08	5.06415e+08
976	M124T147	124.038	147.472	2.46	4.43391e+08	1.42143e+09	5.69653e+08	1.53605e+08	5.98056e+08	1.69401e+08	5.21295e+08	6.87126e+08	4.2542e+08	3.69847e+08	4.88069e+08	7.04081e+08	4.39796e+08	4.06388e+08	5.88981e+08	1.24392e+09	4.50212e+08	7.6842e+08	4.39204e+08	9.05659e+08	4.68269e+08	8.46414e+08	3.74581e+08	3.63141e+08	3.0934e+08	1.11841e+09	3.91213e+08	4.44016e+08	6.59983e+08
977	M124T93	124.038	93.2043	1.55	3.79674e+07	1.71123e+08	5.00227e+07	4.46619e+07	4.81379e+07	5.33022e+07	2.08415e+08	2.07284e+08	4.73118e+07	2.05871e+08	5.5236e+07	1.63857e+08	2.43501e+08	2.33406e+08	5.04286e+07	2.21341e+08	1.98167e+08	2.05887e+08	2.341e+08	1.84587e+08	4.50199e+07	4.54252e+07	1.79846e+08	1.86914e+08	2.29466e+07	1.45087e+08	1.72404e+08	4.61985e+07	2.35283e+08
978	M124T289	124.038	288.627	4.81	2.20959e+08	2.021e+08	5.2192e+08	7.09094e+07	6.90192e+07	6.7712e+07	2.1227e+08	6.14289e+07	2.39302e+08	6.9134e+08	5.79718e+07	1.99537e+08	2.55286e+08	1.58495e+08	1.94161e+08	2.11376e+08	2.85e+08	2.80772e+08	2.64252e+08	4.9457e+08	3.75315e+08	2.31865e+08	6.27442e+08	1.60953e+08	3.47571e+07	4.46891e+07	2.89527e+08	6.61169e+08	2.11275e+08
979	M124T696	124.04	695.792	11.6	2.25058e+08	2.3432e+08	2.18972e+08	5.88504e+07	2.04888e+08	6.54496e+07	1.4898e+08	8.20675e+08	1.84998e+08	1.35815e+08	4.18893e+08	4.80165e+07	1.61035e+08	3.1839e+08	1.71378e+08	2.47176e+08	7.54827e+07	1.53072e+08	2.19809e+08	1.27437e+08	2.24035e+08	4.56361e+08	2.09479e+08	7.09285e+08	2.8169e+07	4.37003e+07	3.52318e+08	1.854e+08	2.09962e+08
980	M124T816	124.038	816.375	13.61	1.40405e+08	2.81194e+07	1.18588e+08	3.13607e+07	1.24059e+08	3.46939e+07	9.02555e+07	2.50953e+07	3.0238e+07	1.14026e+08	9.69096e+07	3.59322e+08	1.57548e+08	2.64062e+07	4.05965e+08	1.42615e+08	1.17701e+08	2.68892e+07	1.07138e+08	2.90096e+07	1.25975e+08	1.50975e+08	3.02884e+07	1.12452e+08	1.61755e+07	2.01612e+07	1.31531e+08	2.43377e+08	1.07341e+08
981	M124T231	124.038	231.032	3.85	6.42509e+08	4.26639e+08	3.09942e+08	6.56629e+07	3.05208e+08	8.21377e+07	6.43432e+07	6.11356e+07	4.64216e+08	4.75517e+08	6.0118e+07	2.02969e+08	2.96747e+08	1.76483e+08	4.63237e+08	1.25339e+08	2.21176e+08	6.61725e+07	2.14011e+08	1.21769e+08	2.50118e+08	2.26826e+08	2.28368e+08	5.92369e+08	3.48323e+07	4.12815e+07	5.71268e+07	2.14906e+08	2.75568e+08
982	M124T641	124.04	641.193	10.69	1.59729e+08	2.14598e+08	2.1131e+08	4.59006e+07	2.66777e+08	5.26366e+07	4.51297e+07	3.89667e+08	4.0985e+08	8.64097e+08	4.51468e+07	4.27293e+07	1.63151e+08	1.25832e+08	1.97749e+08	1.83472e+08	1.72618e+08	1.62047e+08	4.42149e+08	1.58965e+08	3.8307e+07	1.81287e+08	1.90913e+08	3.49063e+08	2.50172e+07	3.41482e+07	1.36739e+08	2.13962e+08	1.35322e+08
983	M124T260	124.038	260.46	4.34	6.32607e+07	7.48564e+08	1.8805e+08	7.76282e+07	6.80954e+07	6.8316e+07	2.48891e+08	6.08732e+07	3.11986e+08	1.69262e+08	6.22367e+07	2.20859e+08	2.54041e+08	6.02001e+07	1.64116e+08	9.41546e+08	3.44366e+08	6.72954e+07	1.13673e+09	8.04819e+08	1.8754e+08	2.0817e+08	3.6409e+08	2.06818e+08	3.53032e+07	4.11902e+07	6.77811e+08	2.90053e+08	2.07984e+08
984	M124T600	124.039	600.466	10.01	2.40599e+08	1.72797e+08	2.63253e+08	6.95005e+07	4.13436e+08	7.27257e+07	2.64721e+08	4.08993e+08	1.38753e+08	2.68581e+08	5.27293e+07	3.35272e+08	7.38248e+08	8.36189e+08	5.09299e+08	1.56337e+08	4.66641e+08	6.04858e+07	1.71795e+08	1.58387e+08	3.89108e+08	2.27819e+08	5.42498e+07	1.57823e+08	3.09499e+07	3.64044e+07	4.46416e+07	1.58252e+08	6.0524e+07
985	M124T181	124.038	180.771	3.01	2.02514e+08	2.56067e+08	3.54985e+08	9.4074e+07	9.40729e+07	1.01753e+08	7.85889e+07	3.82884e+08	2.51805e+08	3.38394e+08	7.39032e+07	2.54775e+08	7.89757e+07	1.16002e+09	3.82991e+08	2.76021e+08	2.86198e+08	3.30398e+08	5.66096e+08	7.76969e+07	6.05362e+08	3.14878e+08	2.65808e+08	4.42421e+08	4.32452e+07	5.039e+07	6.28881e+07	5.32569e+08	3.407e+08
986	M124T194	124.038	193.582	3.23	2.72281e+08	2.96988e+08	3.11251e+08	8.7466e+07	6.1174e+08	7.98688e+07	7.58484e+07	2.25108e+08	2.7877e+08	3.08058e+08	2.3068e+08	2.2257e+08	1.14136e+09	6.15473e+07	2.39964e+08	2.19429e+08	2.99972e+08	6.58251e+07	6.54019e+07	4.75941e+08	2.37257e+08	2.39848e+08	2.04044e+08	5.34902e+08	4.15321e+07	5.04484e+07	3.69539e+08	2.81011e+08	3.78764e+08
987	M124T129	124.038	129.468	2.16	3.29878e+08	1.05837e+08	4.16353e+08	5.6243e+08	4.16507e+08	1.19503e+08	4.48536e+08	6.58781e+08	1.80386e+08	2.77137e+08	3.19314e+08	4.43208e+08	4.04192e+08	3.57769e+08	5.04034e+08	8.47865e+07	3.67771e+08	3.07993e+08	5.24505e+08	2.58846e+08	4.27433e+08	2.40504e+08	4.70408e+08	8.53979e+08	5.46225e+07	6.67756e+07	5.03305e+08	4.42608e+08	2.26575e+08
988	M124T164	124.038	163.534	2.73	5.44911e+08	1.8173e+08	5.65416e+08	1.16965e+08	9.42003e+08	1.196e+08	3.27616e+08	9.25334e+07	3.86633e+08	3.05552e+08	8.67723e+07	5.43388e+08	3.12816e+08	3.18667e+08	2.15879e+08	7.59703e+07	3.46318e+08	2.50199e+08	2.90738e+08	9.04968e+07	4.06589e+08	3.00085e+08	3.10991e+08	2.77476e+08	5.51927e+07	7.09716e+07	3.9261e+08	3.88499e+08	3.09833e+08
989	M124T742	124.039	741.51	12.36	5.5846e+08	2.1299e+08	2.52116e+08	5.65097e+07	2.04458e+08	6.34086e+07	1.94767e+08	1.39617e+08	1.94992e+08	1.49081e+08	1.88902e+08	4.39446e+07	4.87695e+07	2.37138e+08	1.3727e+08	5.18069e+08	3.50977e+08	5.07269e+07	1.76147e+08	2.52927e+08	2.38637e+08	5.45569e+07	2.38297e+08	4.81801e+08	2.53274e+07	3.95822e+07	3.7409e+07	4.58294e+08	1.06751e+08
990	M124T710	124.04	710.139	11.84	2.35031e+08	2.19615e+08	2.46327e+08	6.10726e+07	3.52979e+08	6.87046e+07	2.06767e+08	4.86759e+07	1.80331e+08	2.1761e+08	4.84732e+07	3.86707e+08	3.33314e+08	4.20565e+08	1.69664e+08	1.25853e+08	3.54378e+08	5.49936e+07	2.52258e+08	1.52762e+08	1.45521e+08	6.3361e+07	1.76702e+08	5.32875e+07	2.96961e+07	4.36458e+07	4.60473e+07	1.32734e+08	3.4437e+08
991	M124T724	124.04	724.371	12.07	4.97845e+07	6.12371e+07	2.61616e+08	6.03656e+07	5.86007e+07	6.00699e+07	2.90616e+08	1.3515e+08	1.84251e+08	1.3141e+08	1.51527e+08	4.97847e+07	2.95282e+08	1.8619e+08	5.01442e+07	5.07463e+07	6.23742e+07	7.28685e+08	2.22372e+08	2.13322e+08	2.0932e+08	6.19402e+08	1.80006e+08	5.20301e+07	2.66752e+07	3.85207e+07	4.81618e+08	5.41498e+07	5.12453e+07
992	M124T429	124.039	429.164	7.15	6.15328e+07	3.89989e+08	9.98601e+08	7.58358e+07	1.98837e+08	7.3944e+07	2.02223e+08	5.82354e+07	8.07802e+08	6.83331e+07	6.21997e+08	2.15657e+08	1.54866e+08	6.51434e+07	4.0003e+08	8.36447e+08	2.9982e+08	1.93932e+08	6.80102e+07	6.70792e+07	1.44197e+08	1.59015e+08	3.77542e+08	3.5444e+08	3.74507e+07	1.96843e+06	5.48491e+07	6.09343e+08	3.11631e+08
993	M124T475	124.039	475.162	7.92	4.41943e+07	1.55166e+08	1.94283e+08	5.4347e+07	1.40758e+08	6.09137e+07	4.76133e+07	5.17924e+07	4.99668e+07	1.77459e+08	1.60447e+08	8.75605e+08	1.67444e+08	4.67137e+07	1.66476e+08	1.78657e+08	1.11945e+09	4.81279e+07	1.72405e+08	7.11735e+08	4.22875e+07	2.12751e+08	1.51425e+08	5.12765e+08	2.6778e+07	2.86067e+07	2.4686e+08	9.60672e+08	2.05683e+08
994	M124T277	124.038	277.212	4.62	1.90038e+08	1.66513e+08	2.9023e+08	6.4988e+07	6.37504e+07	6.07112e+07	2.01292e+08	2.92919e+08	3.48191e+08	5.10254e+07	5.23071e+07	2.90215e+08	2.39171e+08	2.04611e+08	2.50115e+08	3.39511e+08	2.32143e+08	5.34305e+07	5.37932e+07	2.15855e+08	2.2142e+08	1.81131e+08	5.10009e+07	1.87643e+08	2.9373e+07	3.89572e+07	1.72813e+08	1.67018e+08	1.52587e+08
995	M124T565	124.04	564.938	9.42	2.23306e+08	1.83962e+08	3.45644e+08	6.0937e+07	5.67805e+07	5.70196e+07	5.11907e+07	2.34443e+08	5.52143e+07	2.1858e+08	4.73816e+07	7.73129e+08	2.03189e+08	5.08957e+07	1.38967e+08	2.86889e+08	1.30338e+08	5.37249e+08	1.8216e+08	1.59816e+08	4.44198e+07	2.85216e+08	1.21036e+09	5.50473e+07	2.83925e+07	3.52462e+07	1.56285e+08	1.56105e+08	1.60595e+08
996	M124T767	124.04	767.189	12.79	1.57064e+08	3.27549e+08	3.61274e+08	5.63022e+07	3.04116e+08	6.21277e+07	4.67117e+07	9.48354e+08	5.00438e+07	4.28335e+08	1.24467e+08	9.47223e+08	2.17255e+08	1.57162e+08	1.0378e+08	1.33282e+08	3.26236e+08	4.66408e+07	1.88739e+08	1.65721e+08	2.00371e+08	3.90479e+08	1.79624e+08	1.15777e+08	2.6565e+07	3.63109e+07	1.58575e+08	1.72823e+08	2.09108e+08
997	M124T204	124.038	204.294	3.4	2.4136e+08	1.90841e+08	3.10484e+08	7.63688e+07	8.39475e+07	7.98754e+07	7.46173e+07	6.60904e+07	2.8345e+08	2.54814e+08	2.71326e+08	3.98514e+08	6.31887e+07	6.14323e+07	1.98488e+08	2.13401e+08	3.11522e+08	1.12649e+09	2.05918e+08	6.31836e+07	5.09589e+07	2.06236e+08	5.83517e+07	6.07417e+07	3.90908e+07	4.94143e+07	5.65123e+07	3.22951e+08	3.53133e+08
998	M124T443	124.038	442.775	7.38	1.60573e+08	5.75187e+07	6.26917e+07	5.96493e+07	3.29332e+08	6.47339e+07	1.84241e+08	3.2918e+08	5.69894e+07	2.39052e+08	5.12444e+07	1.66187e+08	1.51989e+08	5.25078e+08	5.39403e+07	5.5738e+07	1.45569e+08	1.75088e+08	1.78149e+08	2.23723e+08	2.94863e+08	3.3882e+08	1.38177e+08	5.69326e+07	2.48071e+07	3.36739e+07	3.88711e+08	5.22711e+07	4.95994e+07
999	M124T360	124.039	359.546	5.99	2.49507e+08	2.11344e+08	1.91583e+08	5.65536e+07	2.37855e+08	6.17468e+07	7.83751e+08	6.42026e+08	1.96356e+08	4.87128e+07	2.01172e+08	5.12465e+07	2.24621e+08	2.01908e+08	1.42248e+08	2.23821e+08	4.83461e+07	2.37535e+08	1.938e+08	2.63305e+08	4.26473e+07	5.07693e+07	4.26776e+07	1.78494e+08	2.99813e+07	3.51393e+07	7.35404e+08	1.46486e+08	4.88989e+07
1000	M124T835	124.039	835.268	13.92	5.07978e+07	8.28008e+07	2.36037e+07	2.58644e+07	7.60017e+07	2.58327e+07	9.69273e+07	1.96002e+07	2.30905e+07	8.96227e+07	1.74605e+07	1.0201e+08	8.72369e+07	2.06099e+07	1.96828e+07	8.63822e+07	1.63878e+08	9.59398e+07	9.33406e+07	1.73537e+07	1.88607e+07	1.24997e+08	2.35575e+07	7.59852e+07	1.10105e+07	1.3218e+07	9.88629e+07	1.72894e+08	1.94901e+07
1001	M124T417	124.04	416.907	6.95	3.87436e+08	4.39451e+07	4.89422e+07	5.7118e+07	2.68313e+08	6.20673e+07	1.40751e+08	3.37696e+08	4.82375e+07	2.42116e+08	4.98432e+07	1.44025e+08	1.61392e+08	4.97037e+07	2.07514e+08	4.42805e+07	4.60531e+07	1.89758e+08	4.15743e+07	2.70349e+08	8.90208e+07	1.34064e+08	2.44019e+08	4.43307e+07	2.53516e+07	9.01467e+06	3.36831e+07	4.92045e+07	1.9632e+08
1002	M124T612	124.04	611.857	10.2	2.11004e+08	1.3119e+08	1.8515e+08	4.64953e+07	2.13734e+08	5.56818e+07	3.65322e+08	4.1845e+07	1.61128e+08	1.07368e+08	4.22833e+07	4.00173e+07	4.12964e+07	4.59712e+07	4.73262e+07	2.10306e+08	4.35347e+07	2.20381e+08	4.18959e+08	1.69007e+08	4.08327e+07	1.52354e+08	4.40372e+07	2.27313e+08	2.419e+07	3.11381e+07	5.12768e+08	4.0227e+08	4.65434e+07
1003	M124T800	124.039	800.195	13.34	1.18055e+08	1.81043e+08	1.52336e+08	3.77691e+07	1.46036e+08	4.36101e+07	1.03599e+08	3.38733e+07	3.55967e+07	9.89304e+07	1.74406e+08	3.32248e+07	3.6253e+07	3.2837e+07	3.36093e+07	4.38817e+08	3.36297e+08	1.08301e+08	2.18788e+08	9.78551e+07	3.97257e+07	1.75352e+08	6.43764e+08	3.73801e+07	2.25462e+07	2.76281e+07	2.96499e+07	1.65909e+08	1.12058e+08
1004	M124T542	124.04	542.394	9.04	5.57334e+07	7.88581e+08	6.53792e+07	6.7627e+07	2.62673e+08	6.25596e+07	2.56788e+08	5.85293e+07	6.09488e+07	2.86488e+08	2.30906e+08	5.54114e+07	5.82764e+07	4.05892e+08	5.6494e+07	2.68315e+08	2.32992e+08	6.15752e+07	1.5038e+08	5.80697e+07	6.22694e+08	1.61702e+08	5.83148e+07	6.04738e+07	8.6604e+06	3.56933e+07	5.06231e+07	1.65803e+08	2.92772e+08
1005	M124T677	124.039	676.938	11.28	2.30299e+08	6.5122e+08	4.19744e+08	6.92429e+07	6.83696e+07	7.12349e+07	1.99023e+08	6.07636e+07	3.80117e+08	5.82478e+07	5.30847e+07	5.83856e+07	2.6869e+08	2.68989e+08	6.00484e+07	1.95822e+08	2.37947e+08	1.71989e+08	1.73145e+08	2.97554e+08	1.80869e+08	3.71221e+08	6.02766e+07	6.09077e+07	2.95353e+07	5.02654e+07	5.409e+07	1.60637e+08	2.67051e+08
1006	M124T383	124.04	382.901	6.38	2.42465e+08	3.30182e+08	1.99513e+08	8.72963e+07	3.15169e+08	9.73902e+07	2.25008e+08	7.13328e+07	3.43944e+08	2.15466e+08	3.63476e+08	1.54178e+08	3.36991e+08	7.4604e+07	7.98538e+07	3.76486e+08	7.2049e+07	7.56342e+07	7.17012e+07	2.05128e+08	7.10718e+08	2.08896e+08	7.96928e+08	2.43071e+08	4.07668e+07	5.11148e+07	1.8255e+08	3.80354e+08	2.30916e+08
1007	M124T306	124.039	306.244	5.1	6.06759e+07	3.21988e+08	7.37283e+07	7.09883e+07	7.52699e+07	7.28834e+07	3.07845e+08	7.2297e+08	2.64576e+08	4.35545e+08	6.11209e+07	1.72058e+08	2.36182e+08	4.26532e+08	2.08118e+08	1.68561e+08	2.88237e+08	6.00325e+07	2.60601e+08	2.5745e+08	2.54064e+08	1.78076e+08	1.97575e+08	6.07743e+07	3.62669e+07	4.20051e+07	1.56574e+08	5.85504e+07	3.95539e+08
1008	M124T500	124.039	499.518	8.33	5.1984e+07	1.5636e+08	6.56495e+08	6.83269e+07	6.6e+07	6.5234e+07	1.46209e+08	2.40374e+08	2.63992e+08	4.79319e+08	3.87471e+08	5.42769e+07	1.19629e+08	2.15045e+08	2.00556e+08	5.05585e+08	5.70111e+07	2.80453e+08	1.41253e+08	5.27705e+07	2.25893e+08	5.33721e+07	3.27397e+08	1.4596e+08	2.9351e+07	3.82741e+07	1.47113e+08	5.72072e+07	6.29762e+07
1009	M124T332	124.04	331.601	5.53	2.11874e+08	5.64603e+08	9.57667e+08	1.55092e+06	2.73577e+08	1.82403e+06	2.16597e+08	2.43051e+06	2.10442e+08	1.76852e+08	2.88675e+08	3.98292e+08	6.89759e+06	5.58445e+06	4.4233e+06	5.46739e+06	6.67353e+06	6.33848e+06	1.9895e+08	8.70485e+06	5.97516e+06	7.00145e+07	2.72144e+08	7.07351e+06	3.87148e+06	5.00534e+06	2.1993e+06	5.23866e+06	3.25376e+06
1010	M124T400	124.04	400.003	6.67	2.48555e+08	1.75755e+08	5.46461e+07	4.84304e+07	2.73014e+08	5.81409e+07	3.81591e+08	1.91051e+08	5.6985e+07	2.52806e+08	1.8596e+08	2.98958e+08	2.19804e+07	2.04697e+07	1.46686e+07	5.11885e+07	2.09928e+07	1.43402e+08	2.19973e+07	3.35835e+07	4.17295e+07	2.47865e+07	2.86838e+08	3.00466e+07	1.01545e+07	1.26402e+07	2.62445e+08	1.47052e+08	1.59995e+08
1011	M124T218	124.038	217.833	3.63	2.18246e+08	4.27287e+08	1.88001e+08	8.78779e+07	2.69439e+08	3.16881e+08	1.86702e+09	4.32892e+08	3.20364e+08	2.73928e+08	3.05062e+08	1.75131e+08	1.83946e+08	6.04172e+07	1.64036e+08	6.29986e+07	6.40848e+07	6.74629e+07	2.59133e+08	6.28679e+07	4.24279e+08	2.34828e+08	6.0749e+07	6.27723e+07	8.38112e+06	4.98024e+07	6.35301e+08	1.92674e+08	1.65445e+08
1012	M124T436	124.075	436.245	7.27	1.30299e+07	1.31299e+07	9.75609e+06	1.22885e+07	1.2465e+07	1.22689e+07	1.32014e+06	1.93736e+07	2.43834e+07	2.248e+07	2.69889e+07	4.34665e+07	3.60903e+06	1.47315e+07	3.48584e+06	2.98436e+06	3.87704e+06	1.04041e+07	1.32839e+07	2.95925e+06	3.98654e+06	3.84827e+06	2.04062e+06	3.66667e+06	1.5237e+06	1.19745e+06	1.40112e+07	1.47255e+07	1.67101e+06
1013	M124T838	124.086	837.954	13.97	1.85535e+08	1.08578e+09	2.71304e+07	1.136e+09	4.45871e+07	1.15014e+08	7.91283e+06	8.87088e+06	6.56283e+07	4.86479e+07	1.08237e+09	1.01845e+09	4.06198e+07	6.29913e+07	6.28655e+07	7.2933e+08	5.12644e+07	5.96588e+07	8.41809e+08	7.56831e+07	7.68848e+06	4.27519e+07	1.20125e+08	4.42485e+07	8.65826e+06	4.04661e+08	3.23524e+07	9.33318e+06	5.85218e+07
1014	M124T797	124.086	797.127	13.29	4.31947e+07	9.36546e+07	4.31071e+07	3.12418e+07	1.16654e+07	5.2682e+07	4.25734e+07	1.15038e+07	3.93092e+07	5.76935e+07	1.11831e+07	1.27771e+07	4.36545e+07	3.09645e+07	4.22562e+07	6.14884e+07	6.21204e+07	4.0639e+07	7.83326e+07	1.14361e+07	3.7109e+07	3.51944e+07	7.36196e+07	4.57779e+07	1.08229e+07	2.84551e+07	5.46605e+07	5.0817e+07	1.0432e+07
1015	M124T810	124.086	810.107	13.5	1.25908e+07	4.65845e+07	1.05684e+08	5.86222e+07	4.5629e+07	1.27322e+07	9.12177e+07	1.05941e+07	3.60788e+07	4.14085e+07	3.50513e+07	4.722e+07	6.66126e+07	6.00524e+07	3.47085e+07	1.51619e+08	5.75922e+07	6.41613e+07	1.38661e+08	5.56543e+07	3.60465e+07	4.52864e+07	4.81805e+07	4.25919e+07	1.05363e+07	3.8853e+07	5.86806e+07	4.38665e+07	4.77656e+07
1016	M124T825	124.086	824.883	13.75	1.89283e+07	7.81175e+07	2.12895e+07	9.17057e+07	5.78929e+07	2.15454e+07	5.96371e+07	1.92e+07	4.59584e+07	7.45119e+07	9.79967e+07	1.21958e+08	5.04059e+07	6.35936e+07	8.66983e+07	2.07337e+07	9.60913e+07	6.16556e+07	1.94226e+07	1.94922e+07	1.28751e+08	6.56283e+07	1.87534e+07	5.01801e+07	6.13231e+07	8.96173e+07	6.68592e+07	1.03568e+08	2.19998e+07
1017	M124T768	124.086	767.562	12.79	1.02632e+07	3.07058e+07	7.58576e+07	3.5093e+07	1.01824e+07	3.43954e+07	2.55369e+07	9.27329e+06	1.23295e+07	4.74891e+07	9.69515e+06	9.94632e+06	8.15263e+07	2.65445e+07	3.44466e+07	3.69527e+07	2.6858e+07	9.89802e+06	9.31354e+06	3.03675e+07	8.08064e+06	2.94128e+07	9.74823e+06	9.71175e+06	1.0217e+07	8.66162e+06	9.11203e+06	4.5009e+07	1.02996e+07
1018	M125T328	124.591	327.735	5.46	5.99526e+06	1.08876e+06	4.90189e+06	1.40476e+06	5.28894e+06	5.80455e+06	1.5717e+06	4.04401e+06	1.21594e+06	4.1108e+06	654742	1.99439e+06	1.86562e+06	3.23315e+06	568890	832868	3.10791e+06	951559	3.01387e+06	3.08567e+06	2.28885e+06	3.22754e+06	3.33017e+06	1.18718e+06	3.40586e+06	1.33395e+06	4.57194e+06	781523	4.15568e+06
1019	M125T85	124.922	84.6267	1.41	6.88556e+08	6.59849e+08	6.46669e+08	6.25849e+08	6.48438e+08	6.58035e+08	5.83088e+08	5.89671e+08	6.15195e+08	6.42333e+08	5.88998e+08	5.8471e+08	5.59628e+08	5.67862e+08	1.74962e+07	1.71458e+07	5.77396e+08	1.57491e+07	1.30333e+07	5.90062e+08	5.86346e+08	5.45058e+08	5.74527e+08	5.58856e+08	1.71349e+07	5.91206e+08	4.89508e+08	6.03505e+08	6.43681e+08
1020	M125T105	125.023	104.695	1.74	7.48718e+07	1.42517e+07	4.73131e+07	5.64769e+07	2.96588e+07	1.52078e+07	7.92833e+07	7.60205e+07	4.30831e+07	2.37016e+08	5.33498e+07	7.36723e+07	1.00463e+08	7.86324e+07	1.03174e+08	9.97272e+07	6.33694e+07	1.0017e+08	6.88183e+07	1.34096e+08	9.51701e+07	1.30521e+08	8.10256e+07	1.04054e+08	2.97576e+08	1.09314e+08	2.96513e+08	2.86981e+08	3.20055e+08
1021	M125T94_1	125.023	94.4252	1.57	6.31034e+06	2.92856e+07	3.22245e+07	6.888e+06	5.9281e+06	9.23881e+06	4.84957e+07	6.51728e+07	1.1587e+07	1.63757e+07	5.34034e+07	1.31348e+07	7.79454e+07	8.70576e+07	8.81978e+07	1.23875e+08	7.71139e+07	1.85831e+07	1.2646e+07	7.54919e+07	8.28845e+07	6.13821e+07	8.07343e+07	6.41252e+07	1.9902e+07	7.11737e+07	1.63771e+07	1.62585e+07	1.9014e+07
1022	M125T144	125.023	143.983	2.4	1.72139e+07	1.6466e+07	1.6783e+07	6.47353e+07	1.67597e+07	1.56644e+07	6.67365e+07	1.56077e+08	5.0275e+07	2.19701e+07	1.0158e+08	4.44888e+07	8.38768e+07	6.59891e+07	1.12475e+08	6.7599e+07	2.77097e+08	8.91818e+07	1.04402e+08	1.13945e+08	7.46184e+07	3.49324e+08	3.31025e+08	3.67443e+08	8.00415e+07	8.68018e+07	1.91614e+08	2.5205e+07	8.99925e+07
1023	M125T324	125.023	323.503	5.39	4.89285e+06	5.10021e+06	4.78719e+06	1.25741e+07	5.28732e+06	4.74019e+06	5.28421e+07	4.88986e+07	2.02568e+07	5.04908e+06	1.88508e+07	1.39031e+07	2.2723e+07	7.05159e+06	6.9252e+06	2.1431e+07	8.79396e+07	6.63389e+06	2.34644e+07	7.67343e+06	7.40496e+06	6.88661e+06	2.89151e+07	3.55038e+07	1.91867e+07	2.86094e+07	5.99024e+07	5.84147e+06	2.94723e+07
1024	M125T76	125.038	76.345	1.27	9.57663e+08	1.00085e+09	1.01656e+09	1.0261e+09	1.10367e+09	1.03351e+09	1.15544e+09	1.16769e+09	1.15056e+09	1.09473e+09	1.03904e+09	1.10353e+09	9.578e+08	9.76184e+08	1.04008e+09	1.02695e+09	9.77451e+08	1.03842e+09	1.22039e+09	1.23209e+09	1.247e+09	1.24166e+09	1.23244e+09	1.27312e+09	1.16652e+09	1.09612e+09	1.15656e+09	1.18241e+09	1.13794e+09
1025	M125T104	125.042	103.814	1.73	3.20104e+07	2.61858e+07	3.83801e+07	2.69735e+07	3.80841e+07	2.2522e+07	2.27826e+07	5.82415e+07	3.37148e+07	3.41553e+07	4.46694e+07	1.97182e+07	3.29717e+07	3.26569e+07	2.89181e+07	2.39555e+07	2.50939e+07	3.81568e+07	2.52274e+07	2.92402e+07	2.32537e+07	2.81841e+07	3.65309e+07	5.43873e+07	2.52275e+07	2.96398e+07	3.36198e+07	2.93855e+07	3.71529e+07
1026	M125T37	125.042	36.5019	0.61	2.56662e+07	3.14305e+07	4.2655e+07	4.63195e+07	2.3409e+07	3.71824e+07	4.12523e+07	3.77264e+07	6.01623e+07	5.09467e+07	8.68122e+06	1.55888e+07	8.42069e+07	2.00232e+07	4.83894e+07	2.71001e+07	4.36995e+07	1.01043e+07	4.37586e+07	4.02197e+07	8.2963e+07	2.23399e+07	1.53955e+07	4.32143e+07	1.84222e+07	2.17611e+07	2.0596e+07	3.34494e+07	2.94317e+07
1027	M125T60	125.042	60.4856	1.01	1.41222e+07	2.40506e+07	9.23913e+06	3.38129e+07	9.15576e+06	3.63148e+07	2.05376e+07	1.02017e+07	3.97329e+07	2.82861e+07	1.05786e+07	1.03502e+07	1.21395e+07	1.97503e+07	1.53654e+07	2.24267e+07	1.845e+07	2.1195e+07	3.1378e+07	2.88462e+07	1.36894e+07	2.09375e+07	8.11515e+06	4.39276e+07	6.7583e+06	1.60197e+07	1.30095e+07	1.09599e+07	3.63547e+07
1028	M125T443	125.038	442.858	7.38	3.58799e+06	3.50996e+06	9.20162e+06	3.69684e+06	4.02273e+06	8.56956e+06	406410	3.57893e+06	1.09337e+07	4.07693e+06	6.62902e+06	4.12305e+06	1.18511e+07	1.50008e+07	1.43638e+07	3.35223e+06	1.13549e+07	3.34723e+06	4.15057e+06	8.98163e+06	3.97297e+06	1.85916e+07	1.5387e+07	1.42643e+07	1.65543e+07	390647	1.19872e+07	3.78557e+06	329108
1029	M125T106	125.059	106.165	1.77	1.58409e+07	1.30502e+07	4.43906e+07	4.213e+07	4.6121e+07	4.73676e+07	6.70425e+07	6.85782e+07	7.76083e+07	6.18948e+07	3.63434e+07	8.05495e+07	4.85642e+07	2.61336e+08	8.17554e+07	1.05993e+08	2.27859e+08	1.36345e+08	4.66083e+07	7.46514e+07	4.11427e+07	2.43057e+08	4.62306e+07	4.79775e+07	2.54148e+07	5.2145e+07	4.70028e+07	3.32812e+07	8.49259e+07
1030	M125T94_2	125.071	94.2087	1.57	5.72085e+07	9.85609e+06	3.46472e+07	4.43393e+07	1.05515e+07	9.63124e+06	7.91426e+07	1.092e+08	6.79396e+07	9.91265e+07	9.26346e+07	4.7219e+07	1.13382e+08	1.3947e+08	2.56617e+07	2.67454e+07	8.05495e+07	7.92243e+07	9.01913e+07	1.33762e+08	3.01226e+07	1.08149e+08	7.07701e+07	3.17634e+07	5.52428e+07	1.98191e+07	1.24662e+08	2.81328e+07	2.95827e+07
1031	M125T143	125.07	143.241	2.39	3.84751e+07	4.24366e+07	1.20478e+07	1.13126e+07	3.43835e+07	3.51382e+07	1.50248e+07	1.75226e+07	3.45324e+07	4.51537e+07	5.73798e+07	2.83485e+07	1.18298e+08	1.48319e+07	8.14326e+07	3.54027e+07	5.56012e+07	6.21086e+07	3.85296e+07	1.56893e+07	1.64517e+07	1.68559e+07	1.30974e+07	1.362e+07	8.64419e+06	9.83385e+06	3.37658e+07	1.49679e+07	3.01108e+07
1032	M125T295	125.07	295.452	4.92	1.5291e+07	5.08189e+06	4.28292e+06	4.99057e+06	2.14043e+07	3.52386e+07	2.26175e+07	6.43836e+06	1.79572e+07	2.00139e+07	4.60878e+07	8.84331e+06	1.91655e+07	5.932e+06	2.82135e+07	4.75219e+07	1.59654e+07	2.16076e+07	6.55262e+06	2.08956e+07	6.86689e+06	5.52619e+06	5.71915e+06	4.45174e+07	4.32844e+06	4.77613e+06	1.62731e+07	7.20049e+06	1.90513e+07
1033	M125T194	125.07	193.994	3.23	6.02176e+07	2.47098e+07	6.87797e+06	7.68348e+06	1.81542e+07	3.39452e+07	3.46822e+07	9.078e+06	2.43964e+07	8.36507e+06	3.29551e+07	1.54383e+07	2.5099e+07	8.91727e+06	2.59777e+07	2.56424e+07	1.43222e+07	3.13341e+07	8.31465e+06	4.10404e+07	9.37205e+06	8.88672e+06	7.92942e+06	9.56301e+06	5.42889e+06	6.08196e+06	2.30608e+07	9.6288e+06	4.43916e+07
1034	M125T358	125.07	357.986	5.97	4.03043e+07	1.86818e+07	5.8723e+06	4.98877e+06	1.32691e+07	1.83848e+07	1.4044e+07	6.4612e+06	2.00114e+07	1.75185e+07	3.13111e+07	9.22355e+06	1.96622e+07	6.46678e+06	1.90188e+07	2.16414e+07	2.38956e+07	4.33071e+07	2.23301e+07	2.36938e+07	7.538e+06	7.36604e+06	5.43704e+06	1.89231e+07	4.94693e+06	5.33613e+06	2.23128e+07	6.17303e+06	2.01872e+07
1035	M125T230	125.07	229.685	3.83	9.76555e+06	5.76603e+06	5.65196e+06	5.46276e+06	1.98173e+07	1.64438e+07	1.94886e+07	8.47682e+06	1.72958e+07	2.8344e+07	7.34359e+06	1.08018e+07	1.58451e+07	7.67694e+06	1.52754e+07	3.31798e+07	2.13539e+07	2.82075e+07	2.62913e+07	3.30539e+07	9.56539e+06	8.10005e+06	7.34049e+06	3.31104e+07	5.24433e+06	5.32778e+06	1.65227e+07	7.86466e+06	4.61951e+07
1036	M125T250	125.07	250.27	4.17	2.23871e+07	6.20686e+07	7.77929e+06	8.21756e+06	3.38093e+07	2.91727e+07	7.387e+07	1.10073e+07	3.55462e+07	7.28291e+07	7.2972e+07	1.38645e+07	1.27314e+07	8.67741e+06	2.47629e+07	2.76535e+07	2.19695e+07	2.32267e+07	5.94739e+07	5.78048e+07	1.00222e+07	1.04275e+07	1.04669e+07	1.83607e+07	6.45638e+06	7.20459e+06	2.02316e+07	1.01659e+07	2.35934e+07
1037	M125T207	125.07	206.863	3.45	4.89864e+06	1.61721e+07	6.04879e+06	4.96398e+06	3.02233e+07	1.7453e+07	2.2768e+07	6.78302e+06	2.32717e+07	5.56562e+07	1.87899e+07	1.02657e+07	3.99264e+07	7.73385e+06	1.90578e+07	2.01311e+07	2.39534e+07	3.17068e+07	6.34535e+06	2.61771e+07	7.26564e+06	7.71465e+06	7.8332e+06	2.54114e+07	4.74856e+06	5.32166e+06	9.3081e+06	8.13726e+06	3.23768e+07
1038	M125T278	125.07	277.557	4.63	1.23822e+07	3.61296e+07	4.21441e+06	3.66232e+06	2.05161e+07	4.57245e+07	2.99504e+07	5.89209e+06	1.56153e+07	3.57882e+07	2.08281e+07	8.32772e+06	1.82306e+07	6.1174e+06	1.58591e+07	1.79721e+07	2.42748e+07	1.92225e+07	5.26594e+06	7.77282e+07	5.25577e+06	6.11985e+06	5.07891e+06	2.90169e+07	3.16885e+06	4.07265e+06	1.89938e+07	6.54845e+06	2.50217e+07
1039	M125T309	125.07	309.056	5.15	1.93813e+07	1.94963e+07	4.73869e+06	4.53427e+06	2.53377e+07	2.48254e+07	1.97162e+07	5.21065e+06	1.72228e+07	1.5557e+07	3.23937e+07	6.25816e+06	4.38946e+06	5.4069e+06	2.18571e+07	1.74196e+07	2.22896e+07	1.85834e+07	4.13665e+06	2.02013e+07	5.14969e+06	4.9476e+06	4.75312e+06	5.23914e+06	3.67627e+06	3.29023e+06	1.82434e+07	4.65115e+06	1.70673e+07
1040	M125T180	125.07	180.421	3.01	3.19806e+07	2.05217e+07	7.70255e+06	6.49334e+06	9.02135e+07	3.03525e+07	3.28221e+07	9.91665e+06	2.28885e+07	2.08426e+07	3.77953e+07	1.69459e+07	3.71102e+07	1.03674e+07	2.51902e+07	2.43848e+07	2.53567e+07	4.54721e+07	1.49871e+08	3.61426e+07	9.80167e+06	1.09637e+07	8.17787e+06	1.09981e+07	5.80936e+06	5.99219e+06	3.77698e+07	1.05562e+07	2.15303e+07
1041	M125T375	125.07	374.743	6.25	1.86153e+07	4.51956e+07	5.47484e+06	5.89887e+06	1.49865e+07	1.54238e+07	2.45375e+07	7.32797e+06	2.85912e+07	1.92594e+07	1.87398e+07	9.79325e+06	2.26729e+07	7.45435e+06	1.18966e+07	1.31711e+07	1.08869e+07	5.64799e+06	1.51709e+07	1.75148e+07	7.10359e+06	6.19536e+06	6.02643e+06	1.71912e+07	4.8178e+06	5.04401e+06	1.95479e+07	7.55206e+06	2.41562e+07
1042	M125T343	125.07	342.83	5.71	2.50065e+07	1.87396e+07	5.0045e+06	5.03987e+06	1.51746e+07	1.65466e+07	2.40217e+07	7.00922e+06	2.62822e+07	2.65978e+07	2.5477e+07	9.16467e+06	2.03989e+07	7.51321e+06	1.65543e+07	1.43996e+07	1.77617e+07	6.75691e+06	1.26358e+07	1.50317e+07	6.64434e+06	6.43582e+06	6.3407e+06	1.70309e+07	4.49876e+06	4.90739e+06	2.80039e+07	7.24043e+06	3.02566e+07
1043	M125T103	125.071	103.388	1.72	1.24493e+08	2.08495e+08	1.56762e+08	1.4485e+08	1.74054e+08	2.9033e+08	3.2143e+08	1.95209e+08	1.7333e+08	1.86565e+08	2.05153e+08	8.83055e+08	1.33164e+08	1.8271e+08	4.91828e+08	4.59289e+08	1.62696e+08	1.4426e+08	9.05556e+07	1.35654e+08	5.23961e+08	2.0216e+08	1.53007e+08	4.67831e+08	7.64914e+07	2.98452e+08	1.64911e+08	4.69194e+08	4.14007e+08
1044	M126T121	125.515	120.77	2.01	5.04142e+07	2.32189e+07	2.54064e+07	2.41327e+07	2.30663e+07	3.65289e+07	2.05096e+07	1.82075e+07	6.97791e+06	4.41626e+07	1.65013e+07	5.46634e+06	4.86845e+06	3.76453e+06	3.56711e+06	3.67259e+06	5.54134e+06	1.35629e+07	3.48455e+06	2.16091e+06	1.86902e+06	4.11872e+06	4.25254e+06	3.21962e+06	1.42103e+07	2.29812e+07	8.75248e+06	4.37774e+06	5.16288e+06
1045	M126T176	125.528	176.189	2.94	1.13332e+07	7.66649e+06	9.45148e+06	1.06443e+07	2.4389e+06	2.34162e+06	1.56027e+07	1.56009e+07	1.09269e+07	1.27559e+07	7.81631e+06	2.07452e+07	1.37329e+07	4.46076e+06	1.25955e+07	1.57076e+07	1.39394e+07	1.30581e+07	9.41605e+06	1.14068e+07	7.50791e+06	1.12162e+07	2.20575e+06	1.25311e+07	1.06185e+07	1.41424e+07	9.43733e+06	3.29453e+06	1.36058e+07
1046	M126T85	125.926	84.5707	1.41	6.13739e+06	6.40839e+06	1.41829e+06	1.54405e+06	1.56492e+06	8.0007e+06	3.80947e+06	5.61447e+06	4.90813e+06	6.58589e+06	7.01074e+06	3.75579e+06	7.09947e+06	4.3197e+06	4.3872e+06	5.65555e+06	5.3422e+06	6.12646e+06	4.55826e+06	6.65993e+06	4.42029e+06	4.32556e+06	965649	4.16128e+06	6.12492e+06	4.98402e+06	4.26515e+06	5.7836e+06	6.17553e+06
1047	M126T38	125.964	37.7384	0.63	3.30028e+06	3.40136e+06	6.6319e+07	4.47156e+06	6.282e+07	5.85019e+07	5.69958e+07	3.3572e+06	2.61677e+06	6.22425e+07	6.43612e+07	3.59039e+06	4.1063e+06	5.06321e+06	4.50993e+06	6.31278e+07	3.70772e+06	4.22037e+06	6.59493e+07	2.11321e+06	3.49064e+06	3.85678e+06	6.34929e+07	6.48622e+07	6.52775e+07	3.14444e+06	3.97766e+06	3.14614e+06	6.56372e+07
[truncated: 9,760 more rows]

## Sheet: sheet2-negative
NO.	name	m/z	RT	RT/min	A1	A2	A3	A4	A5	A6	B1	B2	B3	B4	B5	B6	C1	C2	C3	C4	C5	C6	D1	D2	D3	D4	D5	D6	QC1	QC2	QC3	QC4	QC5
[truncated: 8,376 more rows]

## Sheet: Sheet3-positive
NO.	name	m/z	RT	RT/min	A1	A2	A3	A4	A5	A6	B1	B2	B3	B4	B5	B6	C1	C2	C3	C4	C5	C6	D1	D2	D3	D4	D5	D6	QC1	QC2	QC3	QC4	QC5
[truncated: 7,618 more rows]

[truncated: 4 more sheets: Sheet4-negative, Sheet5-identified MS-MS, Sheet6-DEMs, Sheet7-KEGG pathway]
