# Supplementary material for: Integrating Metabolomics and Proteomics Technologies Provides Insights into the Flavor Precursor Changes at Different Maturity Stages of Arabica Coffee Cherries
Source: Foods. 2023 Mar 28;12(7):1432. doi: 10.3390/foods12071432 (PMC10094060; doi:10.3390/foods12071432)
Supplement: Supplementary file 1 [file foods-12-01432-s001.zip › Supplementary Data S2.xlsx]

## Sheet: sheet1-peptide
NO.	Confidence	Annotated Sequence	Modifications	Qvality q-value	# Protein Groups	# Proteins	# PSMs	Master Protein Accessions	Positions in Master Proteins	Protein Accessions	# Missed Cleavages	Theo. MH+ [Da]	Sequence Length	Abundances (Scaled): F1: 126, Sample, A1	Abundances (Scaled): F1: 128N, Sample, A2	Abundances (Scaled): F1: 128C, Sample, A3	Abundances (Scaled): F1: 130N, Sample, B1	Abundances (Scaled): F1: 130C, Sample, B2	Abundances (Scaled): F1: 131N, Sample, B3	Abundances (Scaled): F1: 131C, Sample, C1	Abundances (Scaled): F1: 132N, Sample, C2	Abundances (Scaled): F1: 132C, Sample, C3	Abundances (Scaled): F1: 133N, Sample, D1	Abundances (Scaled): F1: 133C, Sample, D2	Abundances (Scaled): F1: 134N, Sample, D3	Abundance: F1: 126, Sample, A1	Abundance: F1: 128N, Sample, A2	Abundance: F1: 128C, Sample, A3	Abundance: F1: 130N, Sample, B1	Abundance: F1: 130C, Sample, B2	Abundance: F1: 131N, Sample, B3	Abundance: F1: 131C, Sample, C1	Abundance: F1: 132N, Sample, C2	Abundance: F1: 132C, Sample, C3	Abundance: F1: 133N, Sample, D1	Abundance: F1: 133C, Sample, D2	Abundance: F1: 134N, Sample, D3	Charge (by Search Engine): Sequest HT	m/z [Da] (by Search Engine): Sequest HT	DeltaM [ppm] (by Search Engine): Sequest HT	Deltam/z [Da] (by Search Engine): Sequest HT	RT [min] (by Search Engine): Sequest HT	Percolator q-Value (by Search Engine): Sequest HT	Percolator PEP (by Search Engine): Sequest HT	XCorr (by Search Engine): Sequest HT
1	High	[K].AAAAAPGILGDCPFCHR.[I]	2xCarbamidomethyl [C12; C15]; 1xTMTpro [N-Term]	0.000133789	1	1	1	A0A6P6VPS2	A0A6P6VPS2 [13-29]	A0A6P6VPS2	0	2088.04	17	110.1	112.9	95.1	103.8	102.4	112.1	111.7	98.4	119.2	77.3	99.1	85.7	99.5	142.8	128.3	146.1	70.7	199.7	161.4	151.8	191.9	76	169	115.1	3	696.689	4.79	0.00333	34.5314	7.779e-05	8.24e-11	4.98
2	High	[K].IVIVGVFPEFSGEK.[F]	1xTMTpro [K14]; 1xTMTpro [N-Term]	0.000133789	2	2	1	A0A6P6UK46; A0A6P6UQB2	A0A6P6UK46 [169-182]; A0A6P6UQB2 [169-182]	A0A6P6UK46; A0A6P6UQB2	0	2129.25	14	122.1	101.4	89.5	116.1	144.8	110.2	89.8	84.1	96.3	133.7	98.4	184.4	63.8	74.1	69.8	94.5	57.8	113.5	75	75	89.6	76	97	143.2	3	710.428	8.58	0.00609	52.4963	7.779e-05	1.197e-06	3.96
3	High	[K].LVIVGDGGTGK.[T]	1xTMTpro [K11]; 1xTMTpro [N-Term]	0.000133789	1	3	5	A0A6P6SQ71	A0A6P6SQ71 [16-26]	A0A6P6SQ71; A0A6P6TRT9; A0A6P6T0E4	0	1623.99	11	71.7	68.1	69.7	128.9	144.7	131.1	106.7	107.4	103.5	145.8	121	127.9	219.6	291.7	318.6	614.6	338.4	791.2	522.2	560.9	564.5	485.7	699.1	581.9	2	812.502	2.15	0.00175	38.523	7.779e-05	7.288e-07	2.78
4	High	[K].LVLSATPSAELTVEER.[N]	1xTMTpro [N-Term]	0.000133789	1	1	2	A0A6P6UM85	A0A6P6UM85 [41-56]	A0A6P6UM85	0	2019.13	16	130.9	137	151.1	109.5	55.2	115.6	114.7	107.4	116.8	63.1	99.6	103.7	110.5	161.9	190.4	144	35.6	192.4	154.9	154.7	175.7	58	158.7	130.2	2	1010.07	6.6	0.00666	44.2658	7.779e-05	4.131e-08	3.36
5	High	[K].LVLPVPAFNVINGGSHAGNK.[L]	1xTMTpro [K20]; 1xTMTpro [N-Term]	0.000133789	1	1	2	A0A6P6T3Q6	A0A6P6T3Q6 [148-167]	A0A6P6T3Q6	0	2612.52	20	85.1	66.8	69.3	138.3	161	120.9	97.6	87.6	108.9	154.6	120.3	130.9	116.9	128.4	142.1	295.8	168.9	327.2	214.4	205.4	266.5	231.1	311.8	267.2	3	871.518	9.23	0.00804	49.5461	7.779e-05	6.053e-16	7
6	High	[KR].LVLPDGSVLR.[A]	1xTMTpro [N-Term]	0.000133789	2	6	1	A0A6P6SRX8; A0A6P6T2I9	A0A6P6SRX8 [517-526]; A0A6P6T2I9 [517-526]	A0A6P6X4K4; A0A6P6SRX8; A0A6P6V2P2; A0A6P6V901; A0A6P6XBG6; A0A6P6T2I9	0	1372.85	10	28.2	30.2	32.9	64.3	51.9	62.3	83.8	98.1	104.7	393.1	251	332.2	15	22.5	26.1	53.3	21.1	65.3	71.3	89.1	99.2	227.6	252	262.8	2	686.933	8.27	0.00568	44.781	7.779e-05	0.000168	2.74
7	High	[KR].LVLPDGSILR.[AC]	1xTMTpro [N-Term]	0.000133789	1	4	1	A0A6P6SMZ3	A0A6P6SMZ3 [609-618]	A0A6P6SMZ3; A0A6P6X1P8; A0A6P6S9T6; A0A6P6S769	0	1386.86	10	28.9	34.4	34.3	109.5	87.4	92.2	97.4	121.4	118.5	320	202.3	285.1	16.7	27.8	29.6	98.6	38.6	105.1	90	119.8	122	201.3	220.6	245	2	693.943	10.19	0.00707	46.1775	7.779e-05	0.000195	2.58
8	High	[K].LVIIPDHYIFTTDER.[A]	1xTMTpro [N-Term]	0.000133789	1	1	1	A0A6P6WMJ2	A0A6P6WMJ2 [125-139]	A0A6P6WMJ2	0	2136.17	15	74.7	82.7	91.2	121.3	103.2	125.1	100.7	107	107.9	133.9	122.6	127.5	39.5	61.2	72	100	41.7	130.4	85.2	96.6	101.7	77.1	122.4	100.3	3	712.735	11.84	0.00843	46.8121	7.779e-05	2.744e-05	4.47
9	High	[K].LVIIPDHYIFTADER.[A]	1xTMTpro [N-Term]	0.000133789	1	1	1	A0A6P6WW49	A0A6P6WW49 [125-139]	A0A6P6WW49	0	2106.16	15	81.5	104.2	98.2	110.1	110.7	102.1	105.1	102.7	105.7	122.5	99.1	101.2	43.5	77.8	78.2	91.5	45.1	107.4	89.7	93.5	100.4	71.1	99.8	80.3	3	702.73	9.2	0.00646	46.9362	7.779e-05	4.712e-05	3.72
10	High	[K].IVLIGDSGVGK.[S]	1xTMTpro [K11]; 1xTMTpro [N-Term]	0.000133789	1	3	1	A0A6P6UEL8	A0A6P6UEL8 [15-25]	A0A6P6UEL8; A0A6P6W3P5; A0A6P6W4V8	0	1666.04	11	103.5	93.3	90.7	106.9	154.1	98.9	93.7	93.9	90.9	106.5	90.6	103.6	72.1	90.9	94.3	116	82	135.7	104.3	111.6	112.7	80.7	119.1	107.3	3	556.023	9.33	0.00518	45.0814	7.779e-05	0.0002323	3.34
11	High	[R].LVLGTLFSEK.[L]	1xTMTpro [K10]; 1xTMTpro [N-Term]	0.000133789	1	2	2	A0A6P6T2S0	A0A6P6T2S0 [54-63]	A0A6P6T2S0; A0A6P6T295	0	1715.06	10	72.2	77.2	71.5	94.5	90.7	88	92.7	85.8	86.4	129.5	132.9	155.6	114.2	170.8	168.7	232.9	109.6	274.2	234.5	231.6	243.4	222.9	396.7	365.8	2	858.037	3.98	0.00341	51.2054	7.779e-05	1.798e-06	3.85
12	High	[R].IVIGLYGDDVPQTAENFR.[A]	1xTMTpro [N-Term]	0.000133789	1	2	2	A0A6P6VAE9	A0A6P6VAE9 [115-132]	A0A6P6VAE9; A0A6P6V468	0	2311.23	18	121.5	115.5	127.3	102.9	59.4	103.3	88.8	93.3	100.5	77.8	99	96.6	272	361.7	425.5	359	101.6	455.9	318	356.4	400.7	189.5	418.3	321.5	2	1156.12	3.62	0.00418	46.8848	7.779e-05	1.645e-10	4.73
13	High	[R].LVLEVAQHLGENVVR.[C]	1xTMTpro [N-Term]	0.000133789	2	2	3	A0A6P6V6E0; A0A6P6VBW3	A0A6P6V6E0 [118-132]; A0A6P6VBW3 [118-132]	A0A6P6V6E0; A0A6P6VBW3	0	1980.16	15	82.3	96.8	93.2	134.4	69.9	123.7	119.7	120.5	120.8	98.5	133.3	137.3	115.8	190.7	195.8	294.6	75.2	343.2	269.4	289.4	302.8	150.8	354	287.3	3	660.731	10.84	0.00715	49.664	7.779e-05	1.812e-11	5.54
14	High	[R].LVIDHAVNISK.[G]	1xTMTpro [K11]; 1xTMTpro [N-Term]	0.000133789	1	5	1	A0A6P6SEE5	A0A6P6SEE5 [152-162]	A0A6P6SEE5; A0A6P6SFA7; A0A6P6S8E3; A0A6P6SDA9; A0A6P6S6D8	0	1817.11	11	104.4	88	104.9	105.7	149.4	112.1	97.2	95.9	92.5	122.4	86.4	90.8	80.9	95.4	121.3	127.5	88.4	171.1	120.4	126.8	127.6	103.2	126.2	104.5	3	606.38	6.49	0.00393	37.1992	7.779e-05	6.906e-05	2.79
15	High	[K].LVIADVAGLDPGTGTLTVFTNEK.[G]	1xTMTpro [K23]; 1xTMTpro [N-Term]	0.000133789	2	2	1	A0A6P6U842; A0A6P6UDL4	A0A6P6U842 [103-125]; A0A6P6UDL4 [103-125]	A0A6P6U842; A0A6P6UDL4	0	2939.66	23	68.4	81.4	79.2	95.5	101.9	109.2	91.1	100	105.7	130.8	119.7	112.2	155.4	258.7	268.5	338.1	176.9	489	330.8	387.6	427.6	323.3	513	378.9	3	980.548	-9.98	-0.00977	53.6169	7.779e-05	0.0003113	1.91
16	High	[R].IVLAASGVEHDELLK.[F]	1xTMTpro [K15]; 1xTMTpro [N-Term]	0.000133789	2	2	1	A0A6P6SQ25; A0A6P6T1Q1	A0A6P6SQ25 [256-270]; A0A6P6T1Q1 [256-270]	A0A6P6SQ25; A0A6P6T1Q1	0	2202.3	15																									3	734.777	8.58	0.0063	44.2555	7.779e-05	2.443e-08	3.38
17	High	[R].LVKYAEGSPEITFSK.[E]	2xTMTpro [K3; K15]; 1xTMTpro [N-Term]	0.000133789	2	3	1	A0A6P6V952; A0A6P6V4X9	A0A6P6V952 [55-69]; A0A6P6V4X9 [55-69]	A0A6P6V952; A0A6P6VA69; A0A6P6V4X9	1	2581.51	15	94.2	90.7	88.8	103.1	117.8	110.1	94.6	97.2	95.2	94	89.5	80.2	203.5	274.4	286.4	347.2	194.5	469	326.9	358.4	366.3	221.1	365	257.5	3	861.179	5.99	0.00515	43.2877	7.779e-05	6.972e-08	2.73
18	High	[K].LVHSDVPEEDRYGNATVVENTER.[G]	1xTMTpro [N-Term]	0.000133789	1	1	1	A0A6P6ST82	A0A6P6ST82 [312-334]	A0A6P6ST82	1	2933.46	23	113.1	110.4	114.3	117.1	105.7	103.2	103.6	99.7	101.9	110.6	97.6	90.3	65	88.8	98.1	104.9	46.4	116.9	95.2	97.8	104.3	69.2	105.9	77.2	4	734.12	1.15	0.00084	21.7496	7.779e-05	3.609e-07	4.44
19	High	[R].LVGVSEETTTGVKR.[L]	1xTMTpro [K13]; 1xTMTpro [N-Term]	0.000133789	3	4	4	A0A6P6XGQ3; A0A6P6WTN4; A0A6P6WUJ0	A0A6P6XGQ3 [199-212]; A0A6P6WTN4 [199-212]; A0A6P6WUJ0 [199-212]	A0A6P6XGQ3; A0A6P6WTN4; A0A6P6WUJ0; A0A6P6XAP3	1	2084.22	14	85	80.6	81.7	139.8	106.1	150.9	106.9	114.3	122.4	113.9	130.9	95.4	407.4	540.4	584	1043.4	388.3	1425	818.6	934.1	1044.4	593.7	1182.6	679.2	3	695.416	5.97	0.00415	26.0976	7.779e-05	3.032e-09	4.42
20	High	[R].LVGVSEETTTGVK.[R]	1xTMTpro [K13]; 1xTMTpro [N-Term]	0.000133789	3	4	2	A0A6P6XGQ3; A0A6P6WTN4; A0A6P6WUJ0	A0A6P6XGQ3 [199-211]; A0A6P6WTN4 [199-211]; A0A6P6WUJ0 [199-211]	A0A6P6XGQ3; A0A6P6WTN4; A0A6P6WUJ0; A0A6P6XAP3	0	1928.12	13	77.2	65.8	70	153.5	134.1	154.5	99.4	96.1	112.6	151.5	130.6	185.8	74	88.2	100.2	229.1	98.2	291.9	152.3	157.2	192.3	158	236.2	264.7	2	964.567	3.98	0.00383	33.4203	7.779e-05	1.935e-10	3.77
21	High	[K].IVGVFYDAK.[E]	1xTMTpro [K9]; 1xTMTpro [N-Term]	0.000133789	2	5	1	A0A6P6T816; A0A6P6UES8	A0A6P6T816 [38-46]; A0A6P6UES8 [38-46]	A0A6P6U8K2; A0A6P6U7Q8; A0A6P6T816; A0A6P6UES8; A0A6P6UGG8	0	1619.97	9	63.7	65.6	80.4	111.2	98.8	111.9	100.3	99.3	91.7	112.3	111.2	122.5	83.2	119.8	156.8	226.2	98.6	288.1	209.5	221.2	213.4	159.6	273.9	237.9	2	810.494	9.27	0.00751	46.2993	7.779e-05	9.902e-06	3.42
22	High	[R].IVGVAHVEDFESIAEPEKR.[A]	1xTMTpro [K18]; 1xTMTpro [N-Term]	0.000133789	1	4	1	A0A6P6WF94	A0A6P6WF94 [365-383]	A0A6P6VTV9; A0A6P6TSX8; A0A6P6X317; A0A6P6WF94	1	2733.51	19	72.7	66.4	80.4	128.5	138.3	132.8	100.2	103.7	116	175	123.1	143.2	72.6	92.8	119.9	199.9	105.5	261.4	160.1	176.8	206.4	190.2	231.9	212.6	4	684.136	5.82	0.00398	41.6882	7.779e-05	2.113e-14	6.46
23	High	[K].IVGSNPEEQQK.[M]	1xTMTpro [K11]; 1xTMTpro [N-Term]	0.000133789	1	2	1	A0A6P6UWQ1	A0A6P6UWQ1 [1362-1372]	A0A6P6URZ7; A0A6P6UWQ1	0	1837.03	11	92.7	92.3	92.3	98	66.4	100.8	95.7	102.1	104.5	83	95.4	97.5	112.9	157.3	167.8	185.9	61.7	241.8	186.3	212.2	226.5	110	219	176.4	2	919.024	4.89	0.0045	21.2002	7.779e-05	4.377e-06	2.97
24	High	[R].LVGNFNVADEITPIKIDNFD.[-]	1xTMTpro [K15]; 1xTMTpro [N-Term]	0.000133789	1	1	1	A0A6P6UQ53	A0A6P6UQ53 [715-734]	A0A6P6UQ53	1	2842.55	20	105.4	94.8	96.1	86.2	138.4	99.5	94.7	95.4	94.3	124.7	100.9	99.2	68.2	85.8	92.8	86.9	68.4	126.8	98	105.3	108.6	87.8	123.1	95.4	3	948.198	10.92	0.01034	53.9871	7.779e-05	1.002e-06	3.95
25	High	[R].LVGGVNYASAAAGILDESGR.[H]	1xTMTpro [N-Term]	0.000133789	1	2	1	A0A6P6USJ2	A0A6P6USJ2 [117-136]	A0A6P6USJ2; A0A6P6UP62	0	2224.19	20	84	89.5	84.4	60.8	93.9	73.8	78.6	78.3	75.7	91.8	73.1	75	62.4	93	93.6	70.4	53.3	108.1	93.4	99.3	100.2	74.2	102.5	82.8	3	742.077	12.09	0.00896	49.7369	7.779e-05	1.076e-08	5.23
26	High	[K].LVGANPDEIRK.[R]	1xTMTpro [K11]; 1xTMTpro [N-Term]	0.000133789	2	2	1	A0A6P6W982; A0A6P6VQZ2	A0A6P6W982 [101-111]; A0A6P6VQZ2 [101-111]	A0A6P6W982; A0A6P6VQZ2	1	1820.09	11	110.8	114.8	134.7	67	65.2	75.2	69	60.4	68.1	55.5	59.5	57.1	217.9	315.9	395.5	205.3	98	291.7	217	202.8	238.7	118.8	220.9	167.1	3	607.37	3.88	0.00235	26.8505	7.779e-05	1.226e-05	2.87
27	High	[K].LVGANPDEIR.[K]	1xTMTpro [N-Term]	0.000133789	2	2	1	A0A6P6W982; A0A6P6VQZ2	A0A6P6W982 [101-110]; A0A6P6VQZ2 [101-110]	A0A6P6W982; A0A6P6VQZ2	0	1387.79	10	122.9	161.7	170.4	80.8	52.6	86.5	79.4	73.6	92.8	53.7	88.3	82.7	93	171.3	192.5	95.3	30.4	129.1	96.1	95	125.1	44.2	126.1	93.1	2	694.402	7.99	0.00554	26.9935	7.779e-05	0.0003462	3.2
28	High	[R].LVGAHIDLVTKEEYAK.[V]	2xTMTpro [K11; K16]; 1xTMTpro [N-Term]	0.000133789	1	2	1	A0A6P6X9N9	A0A6P6X9N9 [216-231]	A0A6P6X9N9; A0A6P6X1E9	1	2698.6	16	103.9	87.9	106	110.2	141.4	133.6	113.8	102.4	115.4	120.4	91.7	83.5	124.3	147.2	189.4	205.4	129.3	315.2	217.7	209.1	245.9	156.8	207	148.6	4	675.407	3.3	0.00223	40.0952	7.779e-05	2.043e-05	3.77
29	High	[K].LVFVPEGADEK.[T]	1xTMTpro [K11]; 1xTMTpro [N-Term]	0.000133789	1	4	2	A0A6P6TEE1	A0A6P6TEE1 [156-166]	A0A6P6TIA1; A0A6P6TEE1; A0A6P6TIC3; A0A6P6TFG4	0	1812.04	11	109.9	114.2	102.7	101.7	86.8	98	120	112.9	105.1	104.7	103.9	141.9	149	216.6	207.9	214.7	89.9	261.8	260.1	261.2	253.8	154.5	265.9	286	2	906.531	7.73	0.00701	44.1078	7.779e-05	0.0001076	2.55
30	High	[K].IVFSNGSQDPWR.[H]	1xTMTpro [N-Term]	0.000133789	1	1	2	A0A6P6T8W3	A0A6P6T8W3 [416-427]	A0A6P6T8W3	0	1709.89	12	107.6	112.9	117.9	101.2	83	118.9	110.1	109.7	121.2	83.5	102.7	81.7	221.1	324.7	361.8	323.9	130.3	481.4	361.7	384.8	443.6	186.7	398.3	249.5	2	855.458	9.33	0.00797	40.954	7.779e-05	1.119e-06	3.09
31	High	[R].LVNANNHGIFAPANGAAGPDNGAEQYR.[A]	1xTMTpro [N-Term]	0.000133789	1	1	1	A0A6P6SYG0	A0A6P6SYG0 [279-305]	A0A6P6SYG0	0	3042.51	27	103.9	133.3	108.6	80.2	82	101.7	102.9	99.1	106.8	87.3	153.3	106.1	87.8	157.6	137	105.5	52.9	169.4	139	142.8	160.7	80.3	244.4	133.3	3	1014.85	8.97	0.00909	31.2845	7.779e-05	2.961e-07	3.41
32	High	[K].LVFLGDQSVGK.[T]	1xTMTpro [K11]; 1xTMTpro [N-Term]	0.000133789	1	4	1	A0A6P6VXP5	A0A6P6VXP5 [12-22]	A0A6P6TPI3; A0A6P6TES7; A0A6P6VXP5; A0A6P6WI73	0	1771.06	11	108.5	97.2	99.2	88.7	104.8	82.8	101.1	91.7	93.3	110.3	103.8	108.7	334.5	419.3	456.4	425.7	246.6	503	498.2	482.3	512.1	370	603.2	497.9	2	886.041	8.14	0.00721	46.1425	7.779e-05	5.479e-07	3.15
33	High	[RK].IVNDGVTVAK.[E]	1xTMTpro [K10]; 1xTMTpro [N-Term]	0.000133789	1	2	2	A0A6P6XDA4	A0A6P6XDA4 [113-122]	A0A6P6XDA4; A0A6P6XBB8	0	1623.99	10	76.2	78.1	80.3	123.3	142.6	136.9	96.1	100.4	107.1	151	130.9	129.6	174.9	250.9	274.9	440.8	249.9	619.3	352.8	393.2	437.6	377.1	566.5	442	2	812.506	7.26	0.0059	30.6854	7.779e-05	3.894e-06	3.85
34	High	[R].LVNHFVSEFR.[R]	1xTMTpro [N-Term]	0.000133789	2	2	1	A0A6P6T4P4; A0A6P6SRY0	A0A6P6T4P4 [242-251]; A0A6P6SRY0 [242-251]	A0A6P6T4P4; A0A6P6SRY0	0	1551.86	10	90.7	98.8	113.3	104.2	87.5	100.9	102.6	98.3	82.6	87	120.9	125.5	45.6	69.5	85	81.6	33.6	100	82.5	84.3	73.9	47.6	114.6	93.8	3	517.96	4.2	0.00217	42.0021	7.779e-05	0.0002831	3.39
35	High	[K].LVTVVNPGNPSGTYIPEPLLK.[R]	1xTMTpro [K21]; 1xTMTpro [N-Term]	0.000133789	1	1	1	A0A6P6XG85	A0A6P6XG85 [168-188]	A0A6P6XG85	0	2816.64	21	101.2	110	100.6	102.2	117	112.8	105.2	101	96	133.8	116.4	131	95	144.4	141	149.4	83.9	208.7	157.9	161.7	160.5	136.7	206.1	182.8	3	939.562	10.37	0.00973	50.3416	7.779e-05	9.481e-06	4.11
36	High	[K].LVTVEDIVR.[Q]	1xTMTpro [N-Term]	0.000133789	1	1	1	A0A6P6V9T2	A0A6P6V9T2 [426-434]	A0A6P6V9T2	0	1347.82	9	68.7	79	79	137.6	49.5	137.3	110.4	120.3	126	121.9	174.9	212	48.7	78.3	83.6	151.9	26.8	191.8	125.1	145.5	159	94	233.8	223.3	2	674.418	8.89	0.00599	44.8905	7.779e-05	0.0001582	3.13
37	High	[R].IVTLEAIEGDIKEQYK.[S]	2xTMTpro [K12; K16]; 1xTMTpro [N-Term]	0.000133789	1	2	2	A0A6P6V5R0	A0A6P6V5R0 [82-97]	A0A6P6V5R0; A0A6P6UZK2	1	2761.62	16	158.5	123.7	169.4	64.9	77.3	71.5	61.7	59	68.5	62.6	41.6	35.3	452.2	493.7	721.6	288.6	168.4	402	281.7	287.2	348.2	194.3	224.2	149.7	3	921.217	7.37	0.00679	50.0123	7.779e-05	4.268e-11	5.64
38	High	[R].IVTLEAIEGDIK.[E]	1xTMTpro [K12]; 1xTMTpro [N-Term]	0.000133789	1	2	1	A0A6P6V5R0	A0A6P6V5R0 [82-93]	A0A6P6V5R0; A0A6P6UZK2	0	1909.15	12	184.4	149.9	212.8	73.7	89.2	72.7	53.9	57.2	63.9	58.5	50.2	71	132.1	150.3	227.6	82.2	48.8	102.6	61.7	69.9	81.5	45.6	67.8	75.6	3	637.058	5.61	0.00357	49.8265	7.779e-05	2.218e-05	4.1
39	High	[K].LVTAGEEGELLVGVK.[N]	1xTMTpro [K15]; 1xTMTpro [N-Term]	0.000133789	1	1	4	A0A6P6WBT6	A0A6P6WBT6 [76-90]	A0A6P6WBT6	0	2122.26	15	109.4	90.5	96.4	83.5	118.4	84.4	73	79.9	76.4	94.1	74	84.2	432.1	499.9	568.4	513.4	357.1	656.9	461.1	538.4	537.5	404.6	551.7	494.4	3	708.097	6.51	0.0046	46.9761	7.779e-05	1.957e-08	4.19
40	High	[K].LVSWESVSSR.[L]	1xTMTpro [N-Term]	0.000133789	1	2	2	A0A6P6VM06	A0A6P6VM06 [242-251]	A0A6P6VM06; A0A6P6VM55	0	1453.8	10	117.4	120.4	130.4	96.2	63	103.6	97.7	92.6	105.6	70.6	99.9	92	221.9	318.5	368	283.1	91	386.1	295.2	298.5	355.5	145.3	356.3	258.6	2	727.409	9.18	0.00667	37.7512	7.779e-05	1.158e-05	3.25
41	High	[K].LVSWDEQSDCCSWR.[G]	2xCarbamidomethyl [C10; C11]; 1xTMTpro [N-Term]	0.000133789	1	1	2	A0A6P6SM07	A0A6P6SM07 [56-69]	A0A6P6SM07	0	2131.95	14	91.5	98.2	100.5	90.7	84.2	109.5	95.7	97.5	110	73.1	80.7	70	291.7	438.1	478.4	450.3	205.2	688.4	487.9	530.7	624.9	253.6	485.6	332	2	1066.48	0.74	0.00079	41.2887	7.779e-05	9.571e-07	3.65
42	High	[R].IVSSTGALSLSEVPK.[K]	1xTMTpro [K15]; 1xTMTpro [N-Term]	0.000133789	2	2	1	A0A6P6X039; A0A6P6WK79	A0A6P6X039 [199-213]; A0A6P6WK79 [199-213]	A0A6P6X039; A0A6P6WK79	0	2096.25	15	72.2	83.7	97.6	106.8	114.7	105.3	115.8	109.9	98.3	147.4	120.8	125.5	42.3	68.6	85.3	97.4	51.3	121.5	108.4	109.8	102.5	93.9	133.4	109.2	3	699.427	9.48	0.00663	44.443	7.779e-05	3.809e-06	4.02
43	High	[R].IVSSIEQKEESR.[K]	1xTMTpro [K8]; 1xTMTpro [N-Term]	0.000133789	1	1	2	A0A6P6UM85	A0A6P6UM85 [76-87]	A0A6P6UM85	1	2013.15	12	98.5	108.8	105.1	82.5	68.9	88.6	98.1	96.4	93.2	66.5	85.8	57.8	343	530	546	447.5	183.3	608.1	545.8	572.5	577.6	251.8	563.5	299.3	3	671.725	7.1	0.00476	32.7232	7.779e-05	1.495e-05	3.24
44	High	[R].LVSQKFEDPAEGEEALIAK.[F]	2xTMTpro [K5; K19]; 1xTMTpro [N-Term]	0.000133789	1	1	2	A0A6P6XGH8	A0A6P6XGH8 [585-603]	A0A6P6XGH8	1	2986.69	19	67.6	57.5	81.7	127	144.1	143.6	112.5	133.1	127.5	158.2	128.8	76.5	126.9	151	229.1	371.7	206.8	531.6	338	426.7	426.7	323.3	456.4	213.5	3	996.243	7.96	0.00793	43.7874	7.779e-05	1.412e-11	5.87
45	High	[R].LVSPGIDSEGRLPR.[K]	1xTMTpro [N-Term]	0.000133789	1	1	8	A0A6P6SRN2	A0A6P6SRN2 [11-24]	A0A6P6SRN2	1	1800.03	14	97.6	99.3	96.1	107.1	87.1	117.6	110.6	110.3	115.2	80.3	105.3	77.7	460.7	656.2	677.2	787.4	314	1094.3	834.6	888.5	968.6	412.5	938	545.5	3	600.685	6.08	0.00365	29.3714	7.779e-05	6.433e-06	3.86
46	High	[R].LVSPGIDSEGR.[L]	1xTMTpro [N-Term]	0.000133789	1	1	4	A0A6P6SRN2	A0A6P6SRN2 [11-21]	A0A6P6SRN2	0	1433.79	11	107.8	102.3	94.8	108.4	71.2	117.6	102	97.1	100.4	67.9	95.1	109.3	325.9	432.8	427.8	510.6	164.3	700.8	493	501	540.5	223.4	542.1	491	2	717.405	7.83	0.00561	25.8537	7.779e-05	1.834e-05	2.9
47	High	[K].IVSIESEEQLNDSLR.[K]	1xTMTpro [N-Term]	0.000133789	1	1	1	A0A6P6UBY8	A0A6P6UBY8 [93-107]	A0A6P6UBY8	0	2036.08	15	91.8	102.7	98.2	105.2	85.6	136	115.3	106.8	111.3	84.7	132.6	108.4	46.2	72.3	73.8	82.5	32.9	134.9	92.8	91.7	99.8	46.4	125.9	81.1	3	679.371	7.06	0.00479	42.5805	7.779e-05	9.346e-09	4.45
48	High	[R].LVSLEMGK.[I]	1xTMTpro [K8]; 1xTMTpro [N-Term]	0.000133789	1	2	1	A0A6P6XEK1	A0A6P6XEK1 [101-108]	A0A6P6XEK1; A0A6P6XGL5	0	1484.9	8	81	93.8	113	122.6	107.5	106.7	113.8	119.1	114.6	138.9	143.4	140.8	66.7	108.1	138.9	157.3	67.6	173.2	149.8	167.3	168.1	124.5	222.7	172.4	2	742.96	8.3	0.00616	43.5899	7.779e-05	0.0001049	2.59
49	High	[K].LVSGSLAYDDIWFGGR.[T]	1xTMTpro [N-Term]	0.000133789	1	7	1	A0A6P6X9V8	A0A6P6X9V8 [303-318]	A0A6P6X9V8; A0A6P6XCF6; A0A6P6X987; A0A6P6XBX1; A0A6P6X7Y1; A0A6P6XEW1; A0A6P6X9W1	0	2060.08	16	103.7	117.4	109.5	81.3	111.6	86.6	103.4	98.7	106.8	110.9	101.8	100.1	50.6	80.2	79.8	61.8	41.6	83.3	80.7	82.2	92.8	58.9	93.7	72.6	3	687.372	11.43	0.00785	50.3741	7.779e-05	1.52e-07	5.05
50	High	[K].IVSFVDPDGWK.[T]	1xTMTpro [K11]; 1xTMTpro [N-Term]	0.000133789	1	1	7	A0A6P6U8M9	A0A6P6U8M9 [266-276]	A0A6P6U8M9	0	1871.06	11	129.9	123.2	124.4	88.2	98.9	100.8	84.6	84.6	94	79.2	78.4	67.9	844.9	1120.8	1208	894	491.4	1292.7	879.6	938.4	1088.4	560.3	961.7	656.6	2	936.04	9.45	0.00884	49.8605	7.779e-05	1.967e-07	3.84
51	High	[K].LVSEIESVK.[S]	1xTMTpro [K9]; 1xTMTpro [N-Term]	0.000133789	1	2	1	A0A6P6U0U2	A0A6P6U0U2 [28-36]	A0A6P6U0U2; A0A6P6VTZ4	0	1611.98	9	116.1	89.9	98.1	132.1	123.2	138.6	85.6	87.3	92.3	127.2	119.7	120.2	161.9	175.4	204.3	287	131.3	381.1	190.9	207.7	229.3	193.1	314.9	249.2	2	806.502	9.21	0.00742	43.8795	7.779e-05	4.914e-05	3.32
52	High	[R].LVSEGYVLTVLAPNDEAMAK.[L]	1xTMTpro [K20]; 1xTMTpro [N-Term]	0.000133789	1	1	1	A0A6P6SMW0	A0A6P6SMW0 [315-334]	A0A6P6SMW0	0	2728.51	20	77.3	74.4	81.1	83.2	103.1	85.7	79.3	86.3	89.3	156.5	104	108.7	71.2	95.8	111.5	119.4	72.5	155.6	116.8	135.6	146.5	156.8	180.7	148.8	3	910.184	10.17	0.00925	51.2413	7.779e-05	5.356e-08	5.42
53	High	[K].LVQYAPEVTAYVEQNR.[I]	1xTMTpro [N-Term]	0.000133789	1	2	1	A0A6P6WHH8	A0A6P6WHH8 [75-90]	A0A6P6WHH8; A0A6P6W193	0	2184.16	16	87.8	110.1	113.3	98.7	99.2	110.8	89.3	98.2	104.1	97.2	98.5	101.7	56.1	98.4	108.1	98.2	48.4	139.6	91.2	107.1	118.5	67.6	118.7	96.6	3	728.733	9.9	0.00721	46.051	7.779e-05	9.058e-07	4.02
54	High	[R].LVQTAGDQEILVR.[V]	1xTMTpro [N-Term]	0.000133789	1	4	1	A0A6P6UXQ6	A0A6P6UXQ6 [466-478]	A0A6P6VAV8; A0A6P6VAH3; A0A6P6UXQ6; A0A6P6V0Z3	0	1746.01	13	93	127.2	109.9	106.2	117	110.2	107.1	99.1	98.1	103.6	106.2	92	25.9	49.6	45.7	46.1	24.9	60.5	47.7	47.1	48.7	31.4	55.8	38.1	3	582.678	7.01	0.00408	37.2955	7.779e-05	5.493e-06	3.96
55	High	[R].LVQPAYIAVRDEFR.[R]	1xTMTpro [N-Term]	0.000133789	2	2	1	A0A6P6WG65; A0A6P6VXC7	A0A6P6WG65 [327-340]; A0A6P6VXC7 [327-340]	A0A6P6WG65; A0A6P6VXC7	1	1981.12	14	85.7	107.5	104.7	120.4	60.1	91.7	116.1	123.2	110.2	103.4	191.7	108.3	40	70.2	72.9	87.5	21.4	84.3	86.6	98.1	91.6	52.5	168.7	75.1	3	661.051	9.39	0.0062	42.6995	7.779e-05	2.15e-07	4.75
56	High	[R].LVQNFELLPPPGQSK.[I]	1xTMTpro [K15]; 1xTMTpro [N-Term]	0.000133789	1	3	1	A0A6P6ULM4	A0A6P6ULM4 [464-478]	J7FTU8; A0A6P6WX10; A0A6P6ULM4	0	2275.33	15	91.4	86.6	85.5	100.9	128	110.3	98.2	103.7	93.7	95.5	97.3	94.1	68.7	91.1	96	118.2	73.5	163.5	118.1	133	125.5	78.1	138	105.2	3	759.119	5.73	0.00434	47.636	7.779e-05	2.504e-07	4.52
57	High	[R].LVQHQPTQYPTSEELSIGQIK.[F]	1xTMTpro [K21]; 1xTMTpro [N-Term]	0.000133789	1	2	1	A0A6P6VXS2	A0A6P6VXS2 [45-65]	A0A6P6VXS2; A0A6P6W2H8	0	3004.66	21	75.1	69.5	69.1	109.5	162.9	108.9	89	82.1	86.7	138.4	87.9	101.2	111.8	144.7	153.6	253.9	185.2	319.3	211.9	208.4	229.7	224.1	246.8	224	3	1002.23	5.64	0.00565	40.2656	7.779e-05	9.361e-11	5.76
58	High	[R].LVQESALK.[M]	1xTMTpro [K8]; 1xTMTpro [N-Term]	0.000133789	1	6	4	A0A6P6T9X0	A0A6P6T9X0 [314-321]	A0A6P6W2F9; A0A6P6T9X0; A0A6P6SPY7; A0A6P6SJD8; A0A6P6VM99; A0A6P6TJB6	0	1495.93	8	104	89.8	102.3	105	121.9	96.1	94.9	94	102.7	103.8	98.5	98.9	454.1	548.7	666.6	714	406.6	827.3	662.7	700.4	798.4	492.9	811.2	641.7	2	748.476	7.22	0.0054	31.9436	7.779e-05	0.0001998	3.5
59	High	[R].IVPVLPNDTAEELAAR.[V]	1xTMTpro [N-Term]	0.000133789	1	3	1	A0A6P6UHD4	A0A6P6UHD4 [191-206]	A0A6P6UHD4; A0A6P6U8C6; A0A6P6U5M3	0	2012.13	16	80.7	101.8	98.8	100.2	89.9	114.5	107.1	116.3	101.4	98.6	111.5	125	44.3	78.2	81	85.7	37.7	123.9	94	109	99.2	58.9	115.5	102	3	671.387	6.41	0.0043	46.1928	7.779e-05	7.195e-05	3.17
60	High	[K].LVPVGYGIK.[K]	1xTMTpro [K9]; 1xTMTpro [N-Term]	0.000133789	4	4	3	A0A6P6X7C7; A0A6P6VP19; A0A6P6XH13; A0A6P6TUZ3	A0A6P6X7C7 [181-189]; A0A6P6VP19 [174-182]; A0A6P6XH13 [181-189]; A0A6P6TUZ3 [174-182]	A0A6P6X7C7; A0A6P6VP19; A0A6P6XH13; A0A6P6TUZ3	0	1553.99	9	89.8	90.7	99.8	113.3	137.1	115.8	109.1	102	110.7	126	110.5	114.7	258	364.5	427.9	506.8	300.7	655.3	501.1	499.8	566.3	393.7	598.6	489.5	2	777.505	7.9	0.00614	44.3757	7.779e-05	0.0001087	3.02
61	High	[K].LVPGGGATELTVSAILK.[Q]	1xTMTpro [K17]; 1xTMTpro [N-Term]	0.000133789	1	2	1	A0A6P6UFQ5	A0A6P6UFQ5 [407-423]	A0A6P6UFQ5; A0A6P6U9J5	0	2234.36	17	76.6	97.1	83.3	102.7	86.8	88.5	96.8	89.9	89.6	155.3	134.8	160.5	54.6	96.8	88.6	113.9	47.2	124.2	110.3	109.3	113.7	120.4	181.1	169.9	3	745.465	8.01	0.00596	50.4262	7.779e-05	7.664e-07	4.02
62	High	[R].IVPGAAATEIELAIR.[L]	1xTMTpro [N-Term]	0.000133789	1	1	1	A0A6P6SZ39	A0A6P6SZ39 [411-425]	A0A6P6SZ39	0	1828.09	15																									3	610.036	4.42	0.00269	48.9284	7.779e-05	6.797e-07	5.03
63	High	[K].IVNQDPPALSDELIIK.[A]	1xTMTpro [K16]; 1xTMTpro [N-Term]	0.000133789	1	2	1	A0A6P6WLV7	A0A6P6WLV7 [386-401]	A0A6P6WMG5; A0A6P6WLV7	0	2373.39	16	113	109.3	120.6	101.2	125.2	108.1	111.5	95.6	111.4	109.2	104.4	85.8	41	55.5	65.3	57.2	34.7	77.3	64.7	59.2	72	43.1	71.5	46.3	3	791.808	8.2	0.00648	47.5775	7.779e-05	7.932e-07	3.39
64	High	[K].IVNDGVTVAR.[E]	1xTMTpro [N-Term]	0.000133789	1	1	4	A0A6P6T372	A0A6P6T372 [113-122]	A0A6P6T372	0	1347.79	10	89.2	108.3	95.5	97.9	56.6	110.5	102.8	105.2	105.4	64.4	107.9	95.5	407.1	691.7	650.9	696.1	197.4	994	750.8	819.5	856.9	319.8	929.5	648	2	674.402	3.73	0.00251	24.7009	7.779e-05	7.47e-05	2.49
65	High	[R].LVVAPPNFVIK.[I]	1xTMTpro [K11]; 1xTMTpro [N-Term]	0.000133789	1	1	2	A0A6P6WNU7	A0A6P6WNU7 [170-180]	A0A6P6WNU7	0	1805.15	11	105.1	99.1	110.7	105.1	133.4	100.2	89.3	90.3	93.5	125.2	87.6	87.4	239	315.4	376	372.3	231.8	449	324.7	350.5	378.7	310	375.8	295.5	2	903.09	9.68	0.00874	49.608	7.779e-05	0.0002106	3.33
66	High	[R].IVFDDDGNPR.[L]	1xTMTpro [N-Term]	0.000133789	1	1	1	A0A6P6TRF1	A0A6P6TRF1 [186-195]	A0A6P6TRF1	0	1451.74	10	133.7	120.3	127	109.9	73.7	117	89	105.2	102.4	77.2	92.8	103.5	113.3	142.6	160.7	145.1	47.7	195.4	120.6	152.1	154.5	71.2	148.4	130.4	2	726.381	6.78	0.00492	29.4909	7.779e-05	7.022e-06	3.28
67	High	[K].LVFCPAVCDSSSEAICK.[D]	3xCarbamidomethyl [C4; C8; C16]; 1xTMTpro [K17]; 1xTMTpro [N-Term]	0.000133789	1	1	5	A0A6P6UNR9	A0A6P6UNR9 [160-176]	A0A6P6UNR9	0	2551.29	17	109.8	106.9	120.1	64.6	69.8	71.8	67	71.1	79	158.6	134.6	142	1095.3	1492.4	1788.8	1003.6	532.2	1412.1	1068.5	1210.3	1404.1	1722.1	2533.4	2105.5	2	1276.16	8.59	0.01096	44.4562	7.779e-05	9.711e-14	5.14
68	High	[R].IVAIDQNRDTYEIGLPIIR.[K]	1xTMTpro [N-Term]	0.000133789	1	1	1	A0A6P6SI28	A0A6P6SI28 [90-108]	A0A6P6SI28	1	2503.42	19	110.7	101.5	95.3	100.7	137.7	102	86.5	111.1	94.8	108.4	99.6	83.3	59.8	76.7	76.8	84.7	56.8	108.6	74.7	102.4	91.2	63.7	101.5	66.9	4	626.614	5.74	0.00359	47.4286	7.779e-05	4.273e-06	3.95
69	High	[K].IVAGVLEK.[N]	1xTMTpro [K8]; 1xTMTpro [N-Term]	0.000133789	1	2	2	A0A6P6XEK1	A0A6P6XEK1 [203-210]	A0A6P6XEK1; A0A6P6XGL5	0	1436.93	8	74.4	74.4	84.8	94.9	104.2	91.4	98.6	97.2	84	116	106.9	116	88.2	123.4	150	175.1	94.3	213.4	186.7	196.5	177.2	149.6	238.9	204.3	2	718.974	5.56	0.00399	42.896	7.779e-05	0.0003711	3.44
70	High	[KR].LVAGLLGVESGQDAVIR.[A]	1xTMTpro [N-Term]	0.000133789	4	6	3	A0A6P6WKI5; A0A6P6WKF8; A0A6P6WW85; A0A6P6WXU8	A0A6P6WKI5 [185-201]; A0A6P6WKF8 [185-201]; A0A6P6WW85 [185-201]; A0A6P6WXU8 [185-201]	A0A6P6WKI5; A0A6P6WKF8; A0A6P6WW85; A0A6P6WYI1; A0A6P6WXU8; A0A6P6X4J7	0	2001.17	17	102.8	122	111.4	107.5	90.6	124.3	127.5	122.8	126.7	92.9	111.5	96.6	125.2	208	202.6	204.1	84.3	298.5	248.4	255.3	274.9	123.2	256.4	174.9	2	1001.09	7.17	0.00718	49.754	7.779e-05	7.746e-11	3.99
71	High	[R].IVAEWPDLDLEAR.[Q]	1xTMTpro [N-Term]	0.000133789	1	1	1	A0A6P6WHE9	A0A6P6WHE9 [1547-1559]	A0A6P6WHE9	0	1830.99	13																									2	916.007	8.29	0.00759	49.2149	7.779e-05	6.838e-07	3.24
72	High	[K].LVAEAGIGTVASGVAK.[G]	1xTMTpro [K16]; 1xTMTpro [N-Term]	0.000133789	1	2	1	A0A6P6SSD5	A0A6P6SSD5 [1139-1154]	A0A6P6T1G5; A0A6P6SSD5	0	2051.24	16	94.5	92.8	99	115.5	175.5	89.1	96.4	96.5	97.5	127	93	108.1	52.1	71.6	81.5	99.2	73.9	96.8	85	90.8	95.7	76.2	96.7	88.6	3	684.419	3.79	0.00259	43.4682	7.779e-05	2.558e-06	3.26
73	High	[K].LVADVAEAEGHHPDLHLVAWNNVK.[I]	1xTMTpro [K24]; 1xTMTpro [N-Term]	0.000133789	1	4	1	A0A6P6U9I0	A0A6P6U9I0 [105-128]	A0A6P6U9I0; A0A6P6UB44; A0A6P6UB72; A0A6P6UAD6	0	3242.76	24	107.3	99.2	106.3	98.6	143.2	96.2	100.2	95.6	109.3	133.7	114.9	108.4	119.5	154.6	176.7	171.1	121.8	211.2	178.5	181.6	216.9	162	241.5	179.5	4	811.449	5.09	0.00412	45.0688	7.779e-05	4.985e-11	4.71
74	High	[K].LVAAQTGTR.[A]	1xTMTpro [N-Term]	0.000133789	1	1	1	A0A6P6VX99	A0A6P6VX99 [30-38]	A0A6P6VX99	0	1220.73	9	82.3	123.3	117.4	108.9	51.3	100.9	131.8	123.6	136.9	60.2	153.2	122.7	52.9	110.9	112.6	109	25.2	127.8	135.4	135.6	156.7	42.1	185.7	117.2	2	610.873	9.1	0.00555	16.8333	7.779e-05	0.0002922	2.21
75	High	[R].LTYTLDEIEGPFEVNTDGTIK.[F]	1xTMTpro [K21]; 1xTMTpro [N-Term]	0.000133789	1	1	2	A0A6P6TKM0	A0A6P6TKM0 [166-186]	A0A6P6TKM0	0	2963.57	21	187.6	150.6	195.1	85	92.2	96.7	38.5	43.8	46	29.1	24	24.8	337.6	379.3	524.2	238.4	126.8	343.1	110.7	134.4	147.5	56.9	81.5	66.4	3	988.538	8.75	0.00864	51.6868	7.779e-05	1.584e-09	5.09
76	High	[R].LTYDEIQSK.[T]	1xTMTpro [K9]; 1xTMTpro [N-Term]	0.000133789	1	1	1	A0A6P6TKM0	A0A6P6TKM0 [91-99]	A0A6P6TKM0	0	1704.97	9	188.6	139.6	170.2	83	78.6	83.9	50.3	52	47.4	35.1	34.2	33.9	360.8	373.7	486	247.3	114.8	316.2	153.9	169.6	161.6	73.1	123.3	96.4	2	852.991	5.43	0.00463	32.7042	7.779e-05	2.451e-05	3.83
77	High	[K].LTVTDDDVIEK.[S]	1xTMTpro [K11]; 1xTMTpro [N-Term]	0.000133789	1	3	2	A0A6P6UJ40	A0A6P6UJ40 [605-615]	A0A6P6W9G5; A0A6P6UJ40; A0A6P6UJ50	0	1856.05	11	80.9	80.3	88.5	105.9	111.3	111.1	109.4	111	116.4	132.7	117.3	133.1	185.4	257.5	302.7	378.2	194.8	501.7	401	434.3	475.1	331.1	507.4	453.6	2	928.538	9.87	0.00916	39.1002	7.779e-05	2.429e-07	4.4
78	High	[R].LTVMVTNDDGIDAPGLR.[A]	1xOxidation [M4]; 1xTMTpro [N-Term]	0.000133789	1	1	1	A0A6P6X5Y3	A0A6P6X5Y3 [90-106]	A0A6P6X5Y3	0	2107.1	17	98.2	89.3	116.2	82.6	108.2	86.3	94.3	105.8	107.8	128.9	105.3	99.2	70.6	89.8	124.6	92.5	59.4	122.2	108.3	129.7	137.9	100.8	142.7	106	3	703.047	11.57	0.00812	41.9261	7.779e-05	3.317e-05	4.55
79	High	[R].LTVMVTNDDGIDAPGLR.[A]	1xTMTpro [N-Term]	0.000133789	1	1	1	A0A6P6X5Y3	A0A6P6X5Y3 [90-106]	A0A6P6X5Y3	0	2091.11	17	93	95.4	102.4	84.6	86.5	113.3	117.9	125	146.5	119.4	144.3	127.2	21.1	30.3	34.7	29.9	15	50.7	42.8	48.4	59.2	29.5	61.8	42.9	3	697.715	10.74	0.00749	45.4025	7.779e-05	9.184e-08	4.73
80	High	[R].ITVITQGADPVVVAEDGKVK.[L]	2xTMTpro [K18; K20]; 1xTMTpro [N-Term]	0.000133789	1	1	2	A0A6P6SXU1	A0A6P6SXU1 [258-277]	A0A6P6SXU1	1	2951.76	20	86.7	82.6	86.1	119.7	136.3	147.1	118.8	133.6	130.6	137.5	117.7	59.7	109	145.2	161.5	234.3	130.9	364.5	238.7	286.5	292.4	188.1	279.1	111.6	3	984.6	8.25	0.00812	44.2942	7.779e-05	2.115e-14	6.47
81	High	[R].ITVITQGADPVVVAEDGK.[V]	1xTMTpro [K18]; 1xTMTpro [N-Term]	0.000133789	1	1	4	A0A6P6SXU1	A0A6P6SXU1 [258-275]	A0A6P6SXU1	0	2420.39	18	85	88.8	86	107.1	119.3	114.3	101.1	101.8	105.2	132.4	111.8	119.5	360.3	526.6	544.3	707.5	386.5	955.6	685.8	736.3	794.4	610.7	894.4	753.1	3	807.476	9.65	0.00779	45.9568	7.779e-05	1.353e-10	5.6
82	High	[K].ITVGQGPEEK.[G]	1xTMTpro [K10]; 1xTMTpro [N-Term]	0.000133789	1	2	1	A0A6P6TS81	A0A6P6TS81 [243-252]	A0A6P6TS81; A0A6P6T8Y3	0	1665.97	10	107	100.9	95.5	94	94	96.4	92.4	99.6	91.7	89	93.6	80.5	168.6	222.5	224.7	230.8	113.1	299.3	232.9	267.8	257.3	152.6	278.3	188.6	2	833.492	6.39	0.00532	25.6606	7.779e-05	0.0001638	3.54
83	High	[K].LTVEQGVPPASDSWVR.[S]	1xTMTpro [N-Term]	0.000133789	1	6	1	A0A6P6W9G9	A0A6P6W9G9 [173-188]	A0A6P6WDN9; A0A6P6W9H3; A0A6P6WBV3; A0A6P6WAN9; A0A6P6WA11; A0A6P6W9G9	0	2045.1	16	94.8	97.6	75.7	78.3	80.1	86.9	96.4	96	105	75.9	87.7	61.9	75.4	108.7	89.9	97	48.7	136.3	122.6	130.3	148.8	65.7	131.7	73.2	3	682.377	8.62	0.00588	41.2091	7.779e-05	0.0001511	3.27
84	High	[K].ITVEPDTLTFTK.[A]	1xTMTpro [K12]; 1xTMTpro [N-Term]	0.000133789	1	2	1	A0A6P6TBD6	A0A6P6TBD6 [725-736]	A0A6P6TJC1; A0A6P6TBD6	0	1973.15	12	73	64.9	59.1	137	146.7	145.6	136	144.1	146.2	119.9	121.1	104.5	144.3	179.6	174.4	422.2	221.6	567.7	430.2	486.5	515.2	258.1	451.8	307.2	2	987.086	9.71	0.00958	45.3739	7.779e-05	5.416e-08	4.27
85	High	[R].LTVEDPVTVEYITR.[Y]	1xTMTpro [N-Term]	0.000133789	1	1	4	A0A6P6VUV3	A0A6P6VUV3 [97-110]	A0A6P6VUV3	0	1939.07	14	116.9	110.7	116.7	110.6	64.4	129.7	111.3	114.1	118.3	88.6	111.4	109.9	255.9	338.9	381.4	377.2	107.7	559.7	389.6	426.1	461.1	211	460.2	357.7	2	970.046	7.68	0.00745	44.8936	7.779e-05	4.467e-10	3.92
86	High	[RK].LTTVSAIASGTVLGTYEDSR.[F]	1xTMTpro [N-Term]	0.000133789	1	3	1	A0A6P6SUS0	A0A6P6SUS0 [213-232]	A0A6P6SUS0; A0A6P6WUT6; A0A6P6WRG6	0	2345.25	20	75.9	114.1	106.4	75.1	52.7	85.6	94.4	114.3	99.3	76.2	107.2	70.8	28.1	59.1	58.8	43.3	14.9	62.5	55.9	72.2	65.5	30.7	74.9	39	3	782.427	5.72	0.00447	48.7892	7.779e-05	3.449e-08	4.46
87	High	[R].ITTVNSQKIPILSSLQLSAER.[G]	1xTMTpro [K8]; 1xTMTpro [N-Term]	0.000133789	1	1	3	A0A6P6WMC4	A0A6P6WMC4 [332-352]	A0A6P6WMC4	1	2906.72	21	100.3	110.6	112.1	61	74.8	79.7	95	83.4	96.9	99.8	161.4	84.6	449.4	693.6	749.7	426.1	255.9	704.1	680.8	637.7	773.1	486.4	1364.1	563.8	3	969.582	4.8	0.00466	48.5511	7.779e-05	9.284e-13	5.03
88	High	[R].ITTVNSQK.[I]	1xTMTpro [K8]; 1xTMTpro [N-Term]	0.000133789	1	1	6	A0A6P6WMC4	A0A6P6WMC4 [332-339]	A0A6P6WMC4	0	1498.91	8	86.6	98.9	75.3	78.9	73.9	71.3	92	92.2	81.3	104.5	155.1	210.7	570.3	911.5	740.6	809.2	371.7	925.5	969.5	1036	953.8	749.3	1928.4	2063.4	2	749.962	4.99	0.00374	21.2565	7.779e-05	0.0003228	2.41
89	High	[K].LTTFVEGGELK.[T]	1xTMTpro [K11]; 1xTMTpro [N-Term]	0.000133789	1	2	22	A0A6P6WQQ5	A0A6P6WQQ5 [55-65]	A0A6P6WNL6; A0A6P6WQQ5	0	1802.06	11	95.9	100.7	95	99.7	133.4	118.1	105.4	103.6	105.1	104.2	92	84.8	1019.8	1497.8	1508.4	1650.7	1083.7	2474.2	1792.7	1879.2	1989.6	1205	1844.6	1340.5	2	901.539	8.1	0.0073	44.2472	7.779e-05	3.338e-08	3.36
90	High	[K].LTTFVEGGELK.[T]	1xTMTpro [K11]; 1xTMTpro [N-Term]	0.000133789	1	2	2	A0A6P6WQQ5	A0A6P6WQQ5 [55-65]	A0A6P6WNL6; A0A6P6WQQ5	0	1497.85	11	102.1	124.1	99.8	100.6	166.3	102.7	114.4	103.5	107	118.9	94.7	91.9	107.5	182.7	156.8	165	133.7	213.1	192.6	185.9	200.6	136.2	188	143.8	2	749.435	9.01	0.00674	43.0882	7.779e-05	5.402e-05	2.52
91	High	[K].LTTFVDGGEHK.[T]	1xTMTpro [K11]; 1xTMTpro [N-Term]	0.000133789	1	3	3	A0A6P6WXC1	A0A6P6WXC1 [55-65]	A0A6P6WXC1; A0A6P6WNH4; A0A6P6WNI7	0	1812.01	11	63.9	68.4	58	144.4	216.3	150.1	92.8	94.8	109.7	134.9	110.2	100.3	154.8	231.5	209.4	544.3	400	716.2	359.3	391.6	473	355.2	503.1	360.9	3	604.68	6.62	0.004	32.4397	7.779e-05	2.139e-09	5.28
92	High	[K].LTTFLDGGEHK.[T]	1xTMTpro [K11]; 1xTMTpro [N-Term]	0.000133789	1	1	24	A0A6P6WVA8	A0A6P6WVA8 [55-65]	A0A6P6WVA8	0	1826.03	11	96.6	97.6	96.6	102.1	170.4	110.8	97.3	95	101.8	113	88.6	82.8	1823.1	2575.2	2719	2998.7	2455.9	4117.6	2934.4	3057.8	3419.5	2318.6	3152.9	2322.5	3	609.353	7.86	0.00478	40.8072	7.779e-05	2.094e-09	4.87
93	High	[K].LTTFLDGGEHK.[T]	1xTMTpro [K11]	0.000133789	1	1	3	A0A6P6WVA8	A0A6P6WVA8 [55-65]	A0A6P6WVA8	0	1521.82	11	102.1	67.4	71.8	103.9	309.9	73.9	86.9	81.5	77.8	176.7	67.4	93.3	121	111.7	127	191.8	280.5	172.5	164.6	164.8	164.2	227.9	150.6	164.4	3	507.95	7.45	0.00378	22.6258	7.779e-05	0.0001891	2.43
94	High	[R].ITSPLLEPSSVEK.[I]	1xTMTpro [K13]; 1xTMTpro [N-Term]	0.000133789	1	2	2	A0A6P6XI74	A0A6P6XI74 [54-66]	A0A6P6XI74; A0A6P6X6M0	0	2008.18	13	103.5	87.5	91	85.8	146.4	91.6	83.7	92	86.3	143.5	75.2	80.8	148	175.1	194.2	191.1	159.9	258	191.3	224.4	219.7	223.2	202.7	171.7	3	670.07	7.07	0.00474	43.7305	7.779e-05	9.781e-05	3.09
95	High	[K].LTSLDQYISR.[M]	1xTMTpro [N-Term]	0.000133789	2	2	2	A0A6P6UQ38; A0A6P6URC6	A0A6P6UQ38 [553-562]; A0A6P6URC6 [553-562]	A0A6P6UQ38; A0A6P6URC6	0	1499.84	10	103.9	130.1	119.6	112.4	49.8	125.6	114.7	109.7	118.2	73.5	160.9	126.1	116.9	204.9	200.9	197.1	42.8	278.7	206.5	210.7	236.9	90	341.6	211	2	750.429	8.09	0.00606	43.2284	7.779e-05	4.012e-05	2.85
96	High	[K].LTSFETNVVPEEVR.[H]	1xTMTpro [N-Term]	0.000133789	1	3	2	A0A6P6X8G5	A0A6P6X8G5 [251-264]	A0A6P6X8G5; A0A6P6TEY0; A0A6P6X333	0	1924.03	14	96.8	103.8	99.8	87.9	80.1	107.2	101.7	98.7	102.4	75.4	98.3	84.5	250.7	376.1	385.8	354.3	158.5	546.8	421.1	436.2	472	212.4	480.1	325.2	2	962.527	6.11	0.00588	43.3578	7.779e-05	7.195e-08	3.57
97	High	[K].LVALSNTVTFANPNAPVYPR.[L]	1xTMTpro [N-Term]	0.000133789	2	2	1	A0A6P6VBL8; A0A6P6V238	A0A6P6VBL8 [153-172]; A0A6P6V238 [153-172]	A0A6P6VBL8; A0A6P6V238	0	2448.36	20	93.2	138.8	115.4	96.7	73.2	125.6	110.5	116.6	114.5	77.2	124.5	96.2	116.3	242.3	214.9	187.9	69.8	308.8	220.4	248.2	254.5	104.8	293.1	178.4	3	816.798	9.36	0.00764	47.9563	7.779e-05	3.221e-07	3.21
98	High	[K].LVFCPTVCDSSSEAICK.[Y]	3xCarbamidomethyl [C4; C8; C16]; 1xTMTpro [K17]; 1xTMTpro [N-Term]	0.000133789	1	2	7	A0A6P6UMT9	A0A6P6UMT9 [159-175]	A0A6P6UW76; A0A6P6UMT9	0	2581.3	17	85.7	92.4	90.4	68.1	82.7	71.8	74.3	77.4	84.4	196.8	157.7	181.3	644.5	971.7	1014.4	797.6	475	1064.6	893.1	992.7	1130.5	1609.9	2236.6	2026.5	2	1291.16	6.38	0.00824	44.3894	7.779e-05	3.596e-11	5.39
99	High	[K].LVANLITEAGADR.[V]	1xTMTpro [N-Term]	0.000133789	1	4	1	A0A6P6TTY9	A0A6P6TTY9 [198-210]	A0A6P6TTY9; A0A6P6TUZ6; A0A6P6WI96; A0A6P6VVW4	0	1646.94	13	81.9	94.2	88.3	98.8	66.7	103.2	107.9	104.5	101.5	80.8	101.7	106.6	147.4	237	237.1	276.9	91.7	365.8	310.4	320.9	325.2	158.1	345.1	285.2	2	823.978	5.77	0.00475	46.9304	7.779e-05	9.509e-07	2.85
100	High	[K].LVASLPEGGVLLLENVR.[F]	1xTMTpro [N-Term]	0.000133789	2	6	3	A0A6P6SFZ7; A0A6P6SDR2	A0A6P6SFZ7 [106-122]; A0A6P6SDR2 [106-122]	A0A6P6SFZ7; A0A6P6SGW2; A0A6P6SDR9; A0A6P6S6L3; A0A6P6SDR2; A0A6P6SH12	0	2083.24	17	76.3	86.8	83.3	110.9	88.3	107	98.4	100.2	98.5	106	143.8	153.6	188.4	299.6	306.7	426.3	166.5	520.2	388.1	421.8	432.7	284.7	669.3	563.6	2	1042.14	10.7	0.01114	53.1712	7.779e-05	3.629e-10	3.99
101	High	[R].LVETTDDWDTAR.[V]	1xTMTpro [N-Term]	0.000133789	1	2	1	A0A6P6WT46	A0A6P6WT46 [279-290]	A0A6P6WT46; A0A6P6V919	0	1725.86	12	117.7	117	120.8	108.1	77.1	107	109.5	113	107	86.2	93.1	104.1	167.1	232.4	256	239	83.6	299.4	248.6	273.8	270.6	133.1	249.3	219.7	2	863.443	9.71	0.00838	33.6949	7.779e-05	2.047e-07	3.6
102	High	[R].LVESVLNSAKEEYAEK.[A]	2xTMTpro [K10; K16]; 1xTMTpro [N-Term]	0.000133789	1	1	2	A0A6P6TUL0	A0A6P6TUL0 [141-156]	A0A6P6TUL0	1	2721.55	16	71.6	73.2	93.3	118.3	142	139.5	106	109.6	116.3	144.8	113.3	95.3	107.6	154.1	209.5	277	163.1	413.4	254.8	281.3	311.5	236.9	321.3	213.1	3	907.862	8.69	0.00789	48.031	7.779e-05	5.94e-10	4.75
103	High	[K].LVERPQNYTLAPESSK.[Q]	1xTMTpro [K16]; 1xTMTpro [N-Term]	0.000133789	1	2	1	A0A6P6ST63	A0A6P6ST63 [769-784]	A0A6P6T581; A0A6P6ST63	0	2440.37	16	86.4	79.6	86.1	112	120.8	103.9	97.4	96.8	96.4	118	115.8	126.8	243.8	314.5	362.7	492.4	260.5	578.2	439.5	466	484.4	362.3	616.4	532.2	3	814.131	4.09	0.00333	28.7986	7.779e-05	8.373e-10	5.53
104	High	[K].LVENLTDDDYRK.[YH]	1xTMTpro [K12]; 1xTMTpro [N-Term]	0.000133789	3	4	5	A0A6P6WU84; A0A6P6WQY1; A0A6P6WU80	A0A6P6WU84 [222-233]; A0A6P6WQY1 [222-233]; A0A6P6WU80 [222-233]	A0A6P6WU84; A0A6P6WQY1; A0A6P6WU80; A0A6P6X0K3	1	2089.14	12	88.4	83.4	98.8	133	103.2	140.8	79.1	92.7	92.2	136.5	131.6	127.6	324.6	428.6	541.6	760.6	289.3	1018.8	464.4	581	602.8	545.5	911.6	696.5	3	697.057	7.4	0.00515	33.0794	7.779e-05	5.89e-09	5.51
105	High	[K].LVENLTDDDYR.[K]	1xTMTpro [N-Term]	0.000133789	3	4	3	A0A6P6WU84; A0A6P6WQY1; A0A6P6WU80	A0A6P6WU84 [222-232]; A0A6P6WQY1 [222-232]; A0A6P6WU80 [222-232]	A0A6P6WU84; A0A6P6WQY1; A0A6P6WU80; A0A6P6X0K3	0	1656.84	11	101.1	104.9	119.3	117.7	88.9	128.3	79.9	89.1	94.1	103.5	127.8	129.2	94.2	136.7	165.9	170.8	63.3	235.6	119.1	141.7	156.2	104.9	224.6	179	2	828.93	7.82	0.00648	35.984	7.779e-05	9.086e-08	3.35
106	High	[K].LVEIYEDKDNAR.[K]	1xTMTpro [K8]; 1xTMTpro [N-Term]	0.000133789	1	2	1	A0A6P6W3Z5	A0A6P6W3Z5 [58-69]	A0A6P6W3Z5; A0A6P6VM75	1	2073.15	12	96	93.9	101.8	96.1	85.7	100.2	86.9	85.6	90.5	90.5	87.6	97.2	192	262.6	303.7	299.1	130.9	394.9	277.7	292	322.3	196.9	330.2	288.8	3	691.727	9.98	0.0069	35.5532	7.779e-05	1.444e-08	3.42
107	High	[K].LVEIPFKPAR.[V]	1xTMTpro [K7]; 1xTMTpro [N-Term]	0.000133789	2	3	2	A0A6P6S719; A0A6P6SDL4	A0A6P6S719 [77-86]; A0A6P6SDL4 [190-199]	A0A6P6S719; A0A6P6SDL4; A0A6P6S618	0	1778.12	10	76.5	77.5	79.8	126.4	114.5	134.8	108.6	99.4	115.3	111	113.3	117	224.1	317.6	348.9	576.6	256.1	778.1	508.5	496.9	601.2	353.8	626.3	509.6	3	593.381	5	0.00297	43.6103	7.779e-05	0.0004082	3.71
108	High	[K].LVEHIEPLLVK.[N]	1xTMTpro [K11]; 1xTMTpro [N-Term]	0.000133789	1	2	1	A0A6P6VC74	A0A6P6VC74 [464-474]	A0A6P6VC74; A0A6P6V7E5	0	1898.2	11	112.9	91.1	99.5	101.2	127.1	100.1	89.9	104.5	90.8	150.4	95.7	113.5	35.6	40.2	46.8	49.7	30.6	62.2	45.3	56.2	51	51.6	56.9	53.2	3	633.41	9.94	0.00629	45.3606	7.779e-05	3.826e-06	2.27
109	High	[K].IVDYCPPGCAGTIDLSK.[E]	2xCarbamidomethyl [C5; C9]; 1xTMTpro [K17]; 1xTMTpro [N-Term]	0.000133789	1	1	1	A0A6P6STR7	A0A6P6STR7 [100-116]	A0A6P6STR7	0	2474.29	17	98.8	133.5	142.2	127.2	169.5	131.5	64.7	67.5	66.6	83.2	81.6	70.7	61.8	116.8	132.8	123.9	81	162.1	64.7	72	74.2	56.6	96.3	65.7	3	825.442	8.38	0.00691	43.8322	7.779e-05	5.582e-06	3.86
110	High	[R].LVDTSTAIK.[M]	1xTMTpro [K9]; 1xTMTpro [N-Term]	0.000133789	2	3	2	A0A6P6WRX8; A0A6P6WZ03	A0A6P6WRX8 [272-280]; A0A6P6WZ03 [450-458]	A0A6P6WRX8; A0A6P6WZ03; A0A6P6WWW2	0	1555.96	9	97.9	122.8	120.7	139.9	169.2	147.4	83.8	87.2	100.3	91.5	93.6	97	108.3	190.1	199.4	241.2	143	321.4	148.3	164.6	197.6	110.2	195.4	159.6	2	778.486	5.99	0.00466	33.2356	7.779e-05	1.313e-05	3.13
111	High	[K].LVDTFPGQSIDFFGALR.[AS]	1xTMTpro [N-Term]	0.000133789	2	6	2	A0A6P6VN14; A0A6P6W6H9	A0A6P6VN14 [334-350]; A0A6P6W6H9 [334-350]	A0A6P6W6D3; A0A6P6WEZ1; A0A6P6VN14; A0A6P6W6H9; A0A6P6VV71; A0A6P6VMX4	0	2187.18	17	158.8	112.1	166.5	106.7	74.7	121.7	95.8	97.6	98	95.5	83.2	86.1	126.1	124.5	197.4	132	45.3	190.4	121.6	132.3	138.6	82.5	124.6	101.6	2	1094.09	2.52	0.00275	54.0048	7.779e-05	1.225e-09	3.6
112	High	[R].LVDSFYGTDR.[G]	1xTMTpro [N-Term]	0.000133789	2	2	2	A0A6P6U5G9; A0A6P6UIS2	A0A6P6U5G9 [100-109]; A0A6P6UIS2 [100-109]	A0A6P6U5G9; A0A6P6UIS2	0	1476.77	10	90	105	101.2	101	67.2	109.7	106.7	105.8	111.6	75.9	110.5	94.2	262.1	427.9	440.2	458.4	149.5	629.9	497.2	526	579.2	240.7	607.3	408	2	738.89	5.33	0.00393	37.9193	7.779e-05	3.04e-05	2.78
113	High	[K].LVDSFDASYLDVANDGSVFTFR.[T]	1xTMTpro [N-Term]	0.000133789	1	1	1	A0A6P6UMM6	A0A6P6UMM6 [356-377]	A0A6P6UMM6	0	2742.36	22	83.3	73.8	86.2	100.7	135.2	101.5	114.2	103.6	118.1	159.4	97.8	115.4	114.6	142	177.1	215.8	142.1	275.3	251.2	243.2	289.4	238.7	253.8	236	3	914.8	9.73	0.00889	53.7933	7.779e-05	7.581e-11	6.09
114	High	[R].IVDSDSQSTTPR.[F]	1xTMTpro [N-Term]	0.000133789	1	3	1	A0A6P6WJ99	A0A6P6WJ99 [56-67]	A0A6P6WJ99; A0A6P6WJA1; A0A6P6V2Y0	0	1609.84	12	78.1	99	86.7	103.9	33.3	110.6	145.2	160.7	158.2	76.7	175.2	146	40.8	72.4	67.6	84.6	13.3	113.9	121.3	143.3	147.2	43.6	172.7	113.4	2	805.428	8.12	0.00654	16.1349	7.779e-05	1.289e-07	3.05
115	High	[R].IVDQCSNGGLDLDVGPFR.[Q]	1xCarbamidomethyl [C5]; 1xTMTpro [N-Term]	0.000133789	1	1	3	A0A6P6W410	A0A6P6W410 [102-119]	A0A6P6W410	0	2266.15	18	84.5	83.8	84.3	73.3	94.4	77.4	75.6	81.4	76.2	93.5	77	78.4	250.6	347.4	372.9	338.5	213.7	452.3	358.3	411.5	402.3	301.5	430.4	345.5	3	756.059	7.26	0.00548	46.8112	7.779e-05	4.063e-07	4.92
116	High	[K].IVDPETGSSLPR.[N]	1xTMTpro [N-Term]	0.000133789	1	1	1	A0A6P6XBF6	A0A6P6XBF6 [370-381]	A0A6P6XBF6	0	1574.87	12	74.5	79.5	81.1	98	62.4	104	106.1	106.1	107.3	86.8	105.4	111.6	116.9	174.5	189.9	239.5	74.8	321.3	266.1	284	299.7	148.1	311.8	260.2	2	787.942	3.18	0.0025	28.5045	7.779e-05	2.026e-06	3.23
117	High	[K].IVDNQAILEDEAR.[L]	1xTMTpro [N-Term]	0.000133789	1	2	1	A0A6P6WVT7	A0A6P6WVT7 [277-289]	A0A6P6WS07; A0A6P6WVT7	0	1789.96	13	91.7	108.2	107.9	125.7	55.5	138.8	110.4	109.4	111.7	63.6	102.5	92.9	125.4	207.1	220.3	267.9	58	374.1	241.4	255.3	272.2	94.7	264.6	188.8	2	895.491	6.87	0.00615	34.114	7.779e-05	4.658e-10	4.54
118	High	[R].LVDNLEVEFGK.[V]	1xTMTpro [K11]; 1xTMTpro [N-Term]	0.000133789	1	1	1	A0A6P6SDU8	A0A6P6SDU8 [474-484]	A0A6P6SDU8	0	1871.08	11	77	81.4	76	89	85	89.7	91.1	91.9	90.1	90.1	85.3	83.9	89	131.6	131	160.2	75	204.2	168.2	181.1	185.3	113.2	185.8	144	3	624.369	8.29	0.00517	48.4941	7.779e-05	0.0001577	3.28
119	High	[K].IVDLLLGEAQPK.[T]	1xTMTpro [K12]; 1xTMTpro [N-Term]	0.000133789	1	1	1	A0A6P6UBA0	A0A6P6UBA0 [336-347]	A0A6P6UBA0	0	1904.17	12	127.4	122.3	126	95	124.5	79.3	125.7	99.2	99.6	106.1	92.9	77.8	59.5	79.9	87.8	69.1	44.4	73	93.8	79	82.8	53.9	81.8	54	3	635.401	9.34	0.00593	53.6205	7.779e-05	1.153e-05	3.32
120	High	[K].LVDILAEHFDVVAR.[C]	1xTMTpro [N-Term]	0.000133789	1	1	1	A0A6P6SMS2	A0A6P6SMS2 [102-115]	A0A6P6SMS2	0	1901.08	14	112.4	99.5	104.5	110.8	71	125.2	106.8	104.9	101.6	79.6	99.2	109.6	64.9	80.4	90.1	99.7	31.3	142.5	98.6	103.4	104.5	50	108.1	94.1	3	634.371	9.22	0.00584	52.0319	7.779e-05	2.985e-11	4.93
121	High	[K].LVDLALESGK.[I]	1xTMTpro [K10]; 1xTMTpro [N-Term]	0.000133789	2	2	2	A0A6P6VEE2; A0A6P6SCM7	A0A6P6VEE2 [100-109]; A0A6P6SCM7 [100-109]	A0A6P6VEE2; A0A6P6SCM7	0	1653.01	10	79.1	54.8	64.2	120.1	143	117.9	99.5	100.8	110.5	172.6	108.7	150	28.4	27.5	34.4	67.1	39.2	83.4	57.1	61.7	70.6	67.4	73.6	80	3	551.679	8.31	0.00458	46.0229	7.779e-05	7.984e-06	3.68
122	High	[K].LVDEVIQLDKEWR.[H]	1xTMTpro [K10]; 1xTMTpro [N-Term]	0.000133789	1	2	1	A0A6P6WLM4	A0A6P6WLM4 [82-94]	A0A6P6WLM4; A0A6P6W0G5	1	2251.29	13	60.2	65.7	74.5	147.5	129.3	149.4	114.6	110.3	133.7	147.2	128.5	112.3	80.3	122.6	148.5	306.7	131.8	393	244.6	251.2	317.9	213.8	323.6	222.7	3	751.108	6.82	0.00512	49.5498	7.779e-05	9.839e-11	4.75
123	High	[K].LVDAQGNWGPVSASSSIVR.[G]	1xTMTpro [N-Term]	0.000133789	1	2	1	A0A6P6V135	A0A6P6V135 [236-254]	A0A6P6V135; A0A6P6UZ71	0	2247.21	19	118.8	95.1	102.9	99.3	136.8	99.2	99	102.6	99.3	118.9	102.2	97.6	66.2	74.1	85.6	86.2	58.2	108.9	88.2	97.5	98.5	72.1	107.4	80.8	3	749.747	8.87	0.00664	43.8038	7.779e-05	4.527e-08	4.01
124	High	[R].LVDAQDIKK.[E]	2xTMTpro [K8; K9]; 1xTMTpro [N-Term]	0.000133789	1	1	1	A0A6P6VU93	A0A6P6VU93 [45-53]	A0A6P6VU93	1	1942.22	9	85	82.8	95.1	103.8	102.8	113.7	96.9	106.6	111.9	130.8	109.3	102.7	188.3	256.4	314.2	357.9	173.9	496.2	343	402.8	441.4	315.2	456.4	338.1	3	648.079	3.83	0.00248	31.0839	7.779e-05	0.0001098	2.98
125	High	[K].IVCENTLDAR.[L]	1xCarbamidomethyl [C3]; 1xTMTpro [N-Term]	0.000133789	1	1	1	A0A6P6TUL0	A0A6P6TUL0 [198-207]	A0A6P6TUL0	0	1494.79	10	95.5	102.3	103.6	109.4	82.2	107.4	110.6	116	107.5	91.7	119.7	116	149.7	224.4	242.4	267.1	98.4	331.9	277.4	310.4	300.1	156.5	354	270.3	2	747.904	6.55	0.0049	23.2035	7.779e-05	2.107e-05	2.66
126	High	[K].LVAWYDNEWGYSNR.[V]	1xTMTpro [N-Term]	0.000133789	2	2	2	A0A6P6S6L4; A0A6P6SA75	A0A6P6S6L4 [398-411]; A0A6P6SA75 [397-410]	A0A6P6S6L4; A0A6P6SA75	0	2077.01	14	96.2	100.7	92	109	84.1	120.4	108.1	111.3	110.6	101	119.3	123.4	133.9	196.1	191.1	236.3	89.4	330.4	240.6	264.5	274.2	153	313.3	255.4	2	1039.02	9.38	0.00975	47.1705	7.779e-05	1.382e-07	4.02
127	High	[K].LVAWYDNEVGYSTR.[V]	1xTMTpro [N-Term]	0.000133789	1	1	9	A0A6P6VCK4	A0A6P6VCK4 [312-325]	A0A6P6VCK4	0	1977	14	91.4	87.5	89.3	99.1	90.1	112.4	99	98.6	103.8	89.9	98.6	100.3	467.6	625.9	681.8	789.3	352.1	1132.5	809.7	860.5	945.3	500.1	951.4	762.4	2	989.013	7.97	0.00788	45.1311	7.779e-05	2.769e-07	4.01
128	High	[K].LVAWYDNEVGYSTR.[V]		0.000133789	1	1	1	A0A6P6VCK4	A0A6P6VCK4 [312-325]	A0A6P6VCK4	0	1672.8	14																									2	836.905	3.13	0.00262	33.9899	7.779e-05	4.749e-05	2.78
129	High	[K].LVATLPEGGVLLLENVR.[F]	1xTMTpro [N-Term]	0.000133789	2	2	4	A0A6P6V940; A0A6P6V011	A0A6P6V940 [106-122]; A0A6P6V011 [106-122]	A0A6P6V940; A0A6P6V011	0	2097.26	17	67.7	90.9	80.2	115.5	49.2	111.8	120.8	123	112.9	97.3	183.9	165.2	107.2	201.4	189.5	284.8	59.5	348.8	305.8	332.1	318.3	167.5	549.2	388.6	2	1049.14	4.91	0.00515	53.3637	7.779e-05	7.439e-08	4.33
130	High	[K].LVASLPDGGVLLLENVR.[F]	1xTMTpro [N-Term]	0.000133789	2	2	2	A0A6P6S6R3; A0A6P6SEC2	A0A6P6S6R3 [182-198]; A0A6P6SEC2 [182-198]	A0A6P6S6R3; A0A6P6SEC2	0	2069.23	17	93.4	98.4	96	105.7	82.9	110.1	110.5	105.1	100.7	104.2	124.3	117.1	166.2	244.9	255	293	112.7	386.1	314.4	319	319.1	201.6	417.3	309.7	2	1035.13	10.19	0.01055	52.5462	7.779e-05	4.493e-07	3.36
131	High	[K].LTSEEVAELESIANAIKGER.[L]	1xTMTpro [K17]; 1xTMTpro [N-Term]	0.000133789	1	3	1	A0A6P6W4Z7	A0A6P6W4Z7 [304-323]	A0A6P6W4Z7; A0A6P6VHR0; A0A6P6UET8	1	2767.53	20	89.6	70.8	95	102	91.3	108.6	116.9	123.4	133.3	147.3	138.2	76.2	97.7	107.9	154.6	173.1	76	233.3	203.7	229.5	258.7	174.7	284.2	123.4	3	923.191	8.66	0.00799	53.4528	7.779e-05	4.302e-16	5.18
132	High	[R].LVVEDFMPLPSK.[G]	1xTMTpro [K12]; 1xTMTpro [N-Term]	0.000133789	1	2	2	A0A6P6T9X0	A0A6P6T9X0 [175-186]	A0A6P6T9X0; A0A6P6TJB6	0	1983.15	12	58.2	56	72.2	141.3	166.2	158.8	83.2	89.8	111.4	153.8	117.9	118.8	179.8	242.3	333.1	679.9	392.2	966.9	411.1	473.5	613.1	517.1	687.1	545.6	2	992.086	8.47	0.0084	51.211	7.779e-05	1.156e-07	4.27
133	High	[R].LVVEHGLGHLPFTEK.[Q]	1xTMTpro [K15]; 1xTMTpro [N-Term]	0.000133789	2	4	1	A0A6P6VGX9; A0A6P6XJ53	A0A6P6VGX9 [307-321]; A0A6P6XJ53 [296-310]	A0A6P6VGX9; A0A6P6XJ53; A0A6P6VGA0; A0A6P6XKG7	0	2284.33	15	81	79	79.3	120.9	152.8	117.9	89.8	96.3	112.4	138.4	108	119.6	40.2	54.8	58.7	93.4	57.9	115.2	71.2	81.5	99.3	74.7	101.1	88.2	4	571.843	8.46	0.00483	41.3389	7.779e-05	7.61e-07	4.46
134	High	[R].MLGDLEVWAGPLSDYR.[V]	1xTMTpro [N-Term]	0.000133789	1	2	1	A0A6P6UXL3	A0A6P6UXL3 [353-368]	A0A6P6UXL3; A0A6P6VC67	0	2126.09	16																									3	709.371	3.74	0.00265	53.5576	7.779e-05	4.067e-05	3.55
135	High	[KR].MLFSEVLEPLR.[A]	1xTMTpro [N-Term]	0.000133789	1	2	1	A0A6P6UAZ2	A0A6P6UAZ2 [129-139]	A0A6P6UAZ2; A0A6P6UAD5	0	1637.93	11	81.1	108.1	110.4	98.7	76.3	105.2	104.8	103.2	109.7	86.2	103.9	106.6	61.9	115.5	125.8	117.3	44.5	158.2	127.9	134.4	149.2	71.6	149.6	121	2	819.473	7.83	0.00641	51.9422	7.779e-05	6.805e-05	3.65
136	High	[R].MIENEPNNPR.[W]	1xTMTpro [N-Term]	0.000133789	1	2	1	A0A6P6XI88	A0A6P6XI88 [66-75]	A0A6P6X6Y0; A0A6P6XI88	0	1517.77	10	87.2	123.6	120.5	115.8	47.1	125.5	121.9	132	136	64.9	134	105	134.1	266	276.5	277.3	55.3	380.4	299.6	346.2	372.3	108.5	388.6	240	2	759.393	5.98	0.00454	15.5882	7.779e-05	0.000123	2.91
137	High	[K].MIEGDLMELYK.[T]	1xOxidation [M7]; 1xTMTpro [K11]; 1xTMTpro [N-Term]	0.000133789	2	2	3	A0A6P6V7K7; A0A6P6VDR0	A0A6P6V7K7 [88-98]; A0A6P6VDR0 [88-98]	A0A6P6V7K7; A0A6P6VDR0	0	1966.05	11	76.9	82.3	97	110.1	189.2	135.6	92.6	91.1	121.7	114.7	94.4	79.3	275.7	413.2	519.1	615.3	518.4	958.4	531	557.4	777.7	447.7	639	422.9	3	656.023	1.59	0.00104	45.345	7.779e-05	3.508e-06	3.37
138	High	[K].MIEGDLMELYK.[T]	1xTMTpro [K11]; 1xTMTpro [N-Term]	0.000133789	2	2	4	A0A6P6V7K7; A0A6P6VDR0	A0A6P6V7K7 [88-98]; A0A6P6VDR0 [88-98]	A0A6P6V7K7; A0A6P6VDR0	0	1950.06	11	70.6	81.4	91.9	136.3	200.2	154.4	95.6	93.5	117.4	114.9	100.5	83	201.9	325.8	392.1	607.3	437.3	870.3	437.4	456.1	598.2	357.7	542.5	352.9	2	975.541	8.76	0.00855	49.2017	7.779e-05	5.913e-08	3.98
139	High	[K].MIATQEEMVEAK.[V]	1xOxidation [M8]; 1xTMTpro [K12]; 1xTMTpro [N-Term]	0.000133789	1	2	1	A0A6P6V6F9	A0A6P6V6F9 [10-21]	A0A6P6V4I5; A0A6P6V6F9	0	2004.06	12																									3	668.695	3.55	0.00237	28.1046	7.779e-05	0.0004024	3.22
140	High	[K].MKETAEAYLGK.[T]	2xTMTpro [K2; K11]; 1xTMTpro [N-Term]	0.000133789	1	2	1	A0A6P6VSY4	A0A6P6VSY4 [178-188]	A0A6P6VSY4; A0A6P6WBC6	1	2153.25	11	78.4	78.7	85.5	89	132.1	116.1	79.3	79	105.2	110	87.5	74	129.5	181.8	210.7	229	166.6	377.9	209.5	222.6	309.3	197.7	272.7	181.7	3	718.426	7.88	0.00566	37.4584	7.779e-05	5.593e-06	3.03
141	High	[K].MKDTDSEEELKEAFR.[V]	2xTMTpro [K2; K11]; 1xTMTpro [N-Term]	0.000133789	1	1	1	A0A6P6T1V3	A0A6P6T1V3 [77-91]	A0A6P6T1V3	2	2740.46	15	89.6	73.3	110.7	75.9	98.8	115.1	69.8	66.3	105.8	128.4	77.7	60.3	113.5	130	209.3	149.7	95.6	287.5	141.4	143.4	238.7	177.1	185.8	113.5	4	685.875	5.31	0.00364	34.8992	7.779e-05	8.877e-05	2.58
142	High	[K].MGVYDESVPK.[S]	1xTMTpro [K10]; 1xTMTpro [N-Term]	0.000133789	2	2	1	A0A6P6X010; A0A6P6WV75	A0A6P6X010 [232-241]; A0A6P6WV75 [232-241]	A0A6P6X010; A0A6P6WV75	0	1732.94	10	73.1	96.4	109.1	96.9	109.2	110.3	77	78	107.8	87.1	84.9	74.9	130.7	241.3	291.4	270	149.2	389	220.2	238	343.6	169.6	286.4	199.3	2	866.982	7.4	0.00641	31.6524	7.779e-05	3.441e-05	3.15
143	High	[K].MGQLSVLIGNQGEIR.[A]	1xTMTpro [N-Term]	0.000133789	1	2	2	A0A6P6UQF4	A0A6P6UQF4 [313-327]	A0A6P6UQL0; A0A6P6UQF4	0	1919.07	15	86.7	122.1	118.6	77.7	47.7	96.6	100.1	101.6	107.5	55.8	105.4	74.9	283.8	559	579.3	396.1	119.3	623.2	523.5	567	626.6	198.5	650.5	364.4	2	960.046	7.58	0.00727	46.3918	7.779e-05	2.073e-08	4.63
144	High	[K].MGNISPLTGTQGEIR.[R]	1xTMTpro [N-Term]	0.000133789	1	1	2	A0A6P6SE81	A0A6P6SE81 [295-309]	A0A6P6SE81	0	1878.01	15	110.8	122.2	116.7	82.9	97.7	88.7	94.1	93.7	99.2	79.6	87.3	80.7	188.4	290.7	296.3	219.5	126.9	297.3	255.9	271.8	300.4	147.3	280	204.1	2	939.511	4.2	0.00395	36.67	7.779e-05	6.202e-05	3.06
145	High	[R].MGEYSNLSEVLPEGFLER.[VT]	1xTMTpro [N-Term]	0.000133789	2	3	2	A0A6P6T0C5; A0A6P6SKR4	A0A6P6T0C5 [316-333]; A0A6P6SKR4 [316-333]	A0A6P6T0C5; A0A6P6T3X7; A0A6P6SKR4	0	2374.19	18	93.8	116.7	100.7	82.1	104.6	99.2	93.7	92.3	108.7	94.4	96.7	80.6	167.7	292.1	268.9	228.8	142.9	349.6	268.1	281.6	346.2	183.8	326.2	214.3	3	792.076	8.49	0.00672	50.4223	7.779e-05	3.247e-08	4.31
146	High	[K].MGAILATGILDAGGR.[N]	1xTMTpro [N-Term]	0.000133789	1	1	1	A0A6P6WMU2	A0A6P6WMU2 [743-757]	A0A6P6WMU2	0	1719.97	15	96.8	108	91.4	95.2	88	109.9	105.6	98.6	108.1	87.7	101.5	98.6	27.8	43.4	39.2	42.6	19.3	62.2	48.5	48.3	55.3	27.4	55	42.1	3	574	6.59	0.00378	50.3422	7.779e-05	1.763e-06	3.76
147	High	[K].MGAADELTEQQAR.[Q]	1xTMTpro [N-Term]	0.000133789	1	1	1	A0A6P6VQV4	A0A6P6VQV4 [177-189]	A0A6P6VQV4	0	1723.86	13	80.2	117.2	104.2	69.1	67.4	81.4	86.5	94.2	88.5	59	84.3	65.5	124.7	255.1	241.9	167.4	80	249.6	215.1	249.9	245.1	99.9	247.2	151.4	2	862.442	9.76	0.00842	22.5167	7.779e-05	0.0002039	2.17
148	High	[K].MFVLDEADEMLSR.[G]	1xTMTpro [N-Term]	0.000133789	2	4	4	A0A6P6TNY8; A0A6P6XHB6	A0A6P6TNY8 [186-198]; A0A6P6XHB6 [185-197]	A0A6P6TNY8; A0A6P6XHB6; A0A6P6SN58; A0A6P6U1F9	0	1859.92	13	87.3	111.6	124.6	95.3	76.3	125.4	114.4	119.1	139.4	87.4	128.8	107.4	181.9	325.2	387.3	309.3	121.4	514.6	380.9	423.4	517.1	198.1	506	332.5	2	930.47	6.55	0.00609	51.1761	7.779e-05	2.259e-08	4.57
149	High	[K].MFEEIQAK.[L]	1xTMTpro [K8]; 1xTMTpro [N-Term]	0.000133789	1	2	1	A0A6P6TTH7	A0A6P6TTH7 [558-565]	A0A6P6TTH7; A0A6P6VEV1	0	1603.9	8	91.1	97.7	100.5	84.9	111.8	95.5	83.7	84.1	94.9	99.1	93.5	83.7	174.6	262.1	287.7	253.7	163.7	361	256.5	275.3	324	206.7	338.3	238.7	2	802.461	8.82	0.00708	39.4404	7.779e-05	0.0002915	2.43
150	High	[-].METGAIVSAAANSR.[D]	1xAcetyl [N-Term]	0.000133789	1	1	1	A0A6P6T2M0	A0A6P6T2M0 [1-14]	A0A6P6T2M0	0	1419.69	14																									2	710.353	6	0.00426	36.5538	7.779e-05	7.592e-07	3.29
151	High	[-].MEQTFIMIKPDGVQR.[G]	1xAcetyl [N-Term]; 1xOxidation [M7]; 1xTMTpro [K9]	0.000133789	1	1	2	A0A6P6WE87	A0A6P6WE87 [1-15]	A0A6P6WE87	0	2155.12	15	82	83.1	82.6	80.4	95	92	90.7	94.6	92.5	153.5	119.2	104.7	152.7	216.7	229.6	233.2	135.2	337.7	270.2	300.6	306.8	311.2	419	290	3	719.051	7.51	0.00539	44.4436	7.779e-05	7.988e-06	2.59
152	High	[-].MEQTFIMIKPDGVQR.[G]	1xAcetyl [N-Term]; 1xTMTpro [K9]	0.000133789	1	1	1	A0A6P6WE87	A0A6P6WE87 [1-15]	A0A6P6WE87	0	2139.13	15	78.9	86.9	68	74.5	119.7	82.8	86.8	83.5	102.6	224.8	157.8	134.1	35.8	55.2	46.1	52.7	41.5	74.1	63	64.7	82.9	111	135.1	90.5	2	1070.08	10.44	0.01117	46.4026	7.779e-05	4.106e-07	2.82
153	High	[K].MEGVESFDIDLK.[E]	1xTMTpro [K12]; 1xTMTpro [N-Term]	0.000133789	1	3	3	A0A6P6W7G8	A0A6P6W7G8 [27-38]	A0A6P6W7G8; A0A6P6VP44; A0A6P6VQI1	0	1991.07	12	70.4	80.2	107.7	126.1	150.3	131	77.2	93.3	126.9	164.6	124.1	133.5	13.8	22	31.5	38.5	22.5	50.6	24.2	31.2	44.3	35.1	45.9	38.9	2	996.045	9.33	0.00928	46.9084	7.779e-05	2.608e-09	4.36
154	High	[-].MEEGRNPSTGEK.[K]	1xAcetyl [N-Term]; 1xTMTpro [K12]	0.000133789	1	1	2	A0A6P6V2U0	A0A6P6V2U0 [1-12]	A0A6P6V2U0	1	1680.82	12	76.5	64.7	79.4	131.8	215.4	118.6	87.2	88.3	93.2	176.3	93.1	101.9	219.5	259.8	340.1	589.3	472.2	670.8	400.1	432.4	476.5	550.5	504	434.5	2	840.918	6.07	0.0051	13.4088	7.779e-05	1.395e-06	2.68
155	High	[K].MEATPLDK.[SA]	1xTMTpro [K8]; 1xTMTpro [N-Term]	0.000133789	1	2	1	A0A6P6X4B3	A0A6P6X4B3 [179-186]	A0A6P6X4B3; A0A6P6XFN8	0	1512.86	8	81.3	105.8	107.2	81	80	98.2	87	93.9	96.7	65.3	73	56.5	196.3	357.3	386.3	304.5	147.5	467	335.7	386.8	415.6	171.5	332.6	202.9	2	756.939	7.96	0.00602	29.5722	7.779e-05	0.000434	2.78
156	High	[K].MDVELTVEER.[N]	1xTMTpro [N-Term]	0.000133789	1	4	1	A0A6P6SE86	A0A6P6SE86 [36-45]	A0A6P6S579; A0A6P6SDF9; A0A6P6S616; A0A6P6SE86	0	1524.79	10	100.1	143.6	172	100.1	44.2	118.9	102.6	108.4	135.1	64.3	124.4	95.8	53.6	107.6	137.5	83.5	18.1	125.5	87.9	99.1	128.9	37.5	125.7	76.3	2	762.904	6.78	0.00517	34.4327	7.779e-05	8.511e-05	3.21
157	High	[-].MDSNQELPEGTVQNILDQESLK.[W]	1xAcetyl [N-Term]; 1xTMTpro [K22]	0.000133789	1	2	2	A0A6P6W1Z5	A0A6P6W1Z5 [1-22]	A0A6P6W1Z5; A0A6P6WIK8	0	2834.4	22	93.4	84.2	94.9	89.3	134.7	98.4	92.8	90.3	119.3	151.1	98.5	101.7	57.8	72.9	87.7	86.1	63.7	120.1	91.9	95.4	131.5	101.8	115	93.6	3	945.463	-10.34	-0.00977	50.5743	7.779e-05	0.0001045	4.06
158	High	[R].MDPLELETLFK.[I]	1xTMTpro [K11]; 1xTMTpro [N-Term]	0.000133789	1	1	1	A0A6P6S4M1	A0A6P6S4M1 [39-49]	A0A6P6S4M1	0	1944.1	11	108.9	90.5	131.2	122	127.4	107.3	107.9	126.1	146.9	134.9	93.9	110.3	36.8	42.8	66.2	64.2	32.9	71.5	58.3	72.7	88.4	49.6	59.9	55.4	3	648.709	6.55	0.00425	53.9495	7.779e-05	0.0001045	2.88
159	High	[K].MDMPGLDKENVK.[V]	2xTMTpro [K8; K12]; 1xTMTpro [N-Term]	0.000133789	1	1	2	A0A6P6TR99	A0A6P6TR99 [134-145]	A0A6P6TR99	1	2289.28	12	56.5	62.4	61.2	130	213.1	167.6	53.2	58.5	62.9	148.8	87.7	83.7	150.6	232.6	243.6	539.8	434	880.6	227	266.1	298.6	431.7	440.9	331.8	3	763.767	4.8	0.00366	36.1795	7.779e-05	4.2e-05	2.8
160	High	[K].MDGTTNEHPR.[A]	1xTMTpro [N-Term]	0.000133789	1	1	2	A0A6P6U8K1	A0A6P6U8K1 [505-514]	A0A6P6U8K1	0	1461.71	10	108.9	142.3	136.7	104.3	40.8	107.4	129.6	125.9	124.6	59.7	119.2	102.8	107.6	196.7	201.7	160.5	30.8	209.1	204.7	212.3	219.3	64.2	222.3	151	3	487.909	3.72	0.00181	9.5757	7.779e-05	9.16e-06	4.33
161	High	[R].MDGFSGSNYGSR.[V]	1xTMTpro [N-Term]	0.000133789	1	2	1	A0A6P6TKC7	A0A6P6TKC7 [239-250]	A0A6P6TKC7; A0A6P6TKD0	0	1581.73	12	89.6	115.2	100.7	78.1	64.4	88.2	101.8	93.4	94.1	67.3	91.7	77.2	140.6	252.7	235.7	190.8	77.2	272.5	255.2	250	262.9	114.8	271.3	180.1	2	791.37	2.48	0.00196	22.2407	7.779e-05	0.0001077	2.55
162	High	[R].MDFIPGIDGPSEGVPR.[V]	1xTMTpro [N-Term]	0.000133789	1	1	1	A0A6P6U309	A0A6P6U309 [217-232]	A0A6P6U309	0	1991.02	16	107.9	127.7	130	98	81.6	118.2	111	105.1	130.4	84.9	109	85.5	148.4	245.7	266.9	209.9	85.7	320.5	244.1	246.6	319.5	127	282.8	174.7	2	996.02	4.92	0.0049	45.8307	7.779e-05	7.718e-09	3.57
163	High	[K].MLGQILVTK.[Q]	1xTMTpro [K9]; 1xTMTpro [N-Term]	0.000133789	1	1	1	A0A6P6UW51	A0A6P6UW51 [111-119]	A0A6P6UW51	0	1611.02	9																									2	806.019	9.25	0.00745	47.1897	7.779e-05	8.234e-05	3.08
164	High	[K].MDCGAACAGR.[C]	2xCarbamidomethyl [C3; C7]; 1xTMTpro [N-Term]	0.000133789	1	1	1	A0A6P6WAN4	A0A6P6WAN4 [44-53]	A0A6P6WAN4	0	1372.61	10	95.1	135.4	169.5	84.1	55.9	82.3	110.4	101	93.4	55.2	83.6	72	190.4	379.5	506.7	262.2	85.5	324.8	353.6	345.2	333.3	120.2	315.7	214.5	2	686.813	7.36	0.00505	12.47	7.779e-05	4.31e-05	2.64
165	High	[K].MIGQTNIHGPAGDVFHDAFSK.[R]	1xTMTpro [K21]; 1xTMTpro [N-Term]	0.000133789	1	1	1	A0A6P6VDR0	A0A6P6VDR0 [7-27]	A0A6P6VDR0	0	2850.49	21	58	58.1	67.2	133.3	331.2	160.2	62.3	64.3	79.1	109.5	55.3	56.6	29.3	41.1	50.7	104.9	127.8	159.5	50.3	55.4	71.2	60.2	52.7	42.5	4	713.381	5.99	0.00427	41.9464	7.779e-05	2.959e-09	5.33
166	High	[R].MLKEELQLLQEPGSYVGEVVK.[V]	2xTMTpro [K3; K21]; 1xTMTpro [N-Term]	0.000133789	1	4	1	A0A6P6XEK8	A0A6P6XEK8 [77-97]	A0A6P6SZW4; A0A6P6XEK8; A0A6P6X6E9; A0A6P6SQ17	1	3301.89	21	65.1	57	70.2	114.3	180.3	129.1	88	95.1	114.5	176.2	107.5	116.4	51.3	62.9	82.6	140.4	108.6	200.6	110.9	128	160.8	151.2	160	136.4	4	826.237	10.44	0.00861	51.2116	7.779e-05	6.802e-10	5.23
167	High	[R].NAAVEDVQR.[F]	1xTMTpro [N-Term]	0.000133789	1	1	1	A0A6P6TTD0	A0A6P6TTD0 [321-329]	A0A6P6TTD0	0	1305.71	9	96.6	150.7	137	82.8	24.2	106.1	131.1	146.5	118	32.9	142.5	98.5	45.9	100.2	97.2	61.3	8.8	99.4	99.6	118.8	99.9	17	127.8	69.6	2	653.363	7.75	0.00506	12.9761	7.779e-05	3.627e-05	3.06
168	High	[R].NAALSPVAPLAPVTLER.[N]	1xTMTpro [N-Term]	0.000133789	1	2	3	A0A6P6X235	A0A6P6X235 [8-24]	A0A6P6WTQ2; A0A6P6X235	0	2023.19	17	94.6	148.3	130.2	86	59.1	101.4	104.8	105	101.1	53.6	107.9	83.8	211.7	464.6	435.2	299.8	101	447.4	375.1	401.2	402.9	130.5	455.7	279	3	675.075	11.65	0.00786	45.5185	7.779e-05	2.663e-09	3.9
169	High	[R].MYPLPGQQEEHLRPCCQTLENFDEQCVCEAVMYVVR.[Q]	4xCarbamidomethyl [C15; C16; C26; C28]; 1xOxidation [M32]; 1xTMTpro [N-Term]	0.000133789	1	2	2	A0A6P6SAF5	A0A6P6SAF5 [76-111]	A0A6P6SAF5; A0A6P6SCF4	0	4806.19	36	101.8	128.5	138.5	80.3	53.4	117.4	95.8	91.7	124.8	62.9	92.5	64.9	254.9	450	517.5	313.3	102.1	579.1	383.6	391.7	556.4	171.5	437.1	241.5	5	962.056	12.77	0.01228	47.1175	7.779e-05	2.25e-09	8.47
170	High	[R].MYPLPGQQEEHLRPCCQTLENFDEQCVCEAVMYVVR.[Q]	4xCarbamidomethyl [C15; C16; C26; C28]; 1xTMTpro [N-Term]	0.000133789	1	2	5	A0A6P6SAF5	A0A6P6SAF5 [76-111]	A0A6P6SAF5; A0A6P6SCF4	0	4790.19	36	85.8	119.8	141.2	91	35.4	158.2	94.5	87.1	129.4	57.2	91.5	59.3	647	1264.6	1589.1	1069.2	204	2351.8	1140.1	1120.5	1737.7	469.7	1301.3	665.1	4	1198.31	4.94	0.00592	48.7223	7.779e-05	4.529e-12	7.95
171	High	[K].MWQVAETLPQEVLSK.[M]	1xTMTpro [K15]; 1xTMTpro [N-Term]	0.000133789	1	1	1	A0A6P6S7X7	A0A6P6S7X7 [37-51]	A0A6P6S7X7	0	2367.32	15	83.4	81.7	96.6	104.4	145.5	117.6	83.4	95.4	95	147.8	109.7	109.3	75	102.8	129.6	146.2	99.9	208.3	119.9	146.3	152.1	144.6	186	146.1	3	789.782	3.61	0.00285	51.8415	7.779e-05	4.457e-06	4.24
172	High	[R].MVTSEDIGK.[Q]	1xTMTpro [K9]; 1xTMTpro [N-Term]	0.000133789	2	2	1	A0A6P6SQ25; A0A6P6T1Q1	A0A6P6SQ25 [435-443]; A0A6P6T1Q1 [435-443]	A0A6P6SQ25; A0A6P6T1Q1	0	1587.89	9	82.2	102.6	113.3	103.5	98.2	123.8	101.1	110.8	136.1	122.5	124	116.5	110.4	192.9	227.2	216.6	100.7	327.8	217.2	253.9	325.6	179.1	314.3	232.7	2	794.452	4.02	0.00319	29.0868	7.779e-05	2.773e-05	3.41
173	High	[R].MVNHFVQEFK.[R]	1xTMTpro [K10]; 1xTMTpro [N-Term]	0.000133789	3	4	1	A0A6P6UA78; A0A6P6VP42; A0A6P6U8W3	A0A6P6UA78 [243-252]; A0A6P6VP42 [243-252]; A0A6P6U8W3 [243-252]	A0A6P6UA78; A0A6P6W6K4; A0A6P6VP42; A0A6P6U8W3	0	1887.04	10	52.9	60.1	57.7	93.9	115.2	97.9	81.5	70.5	84.6	146.7	111.9	118.4	76.3	121.2	124.2	210.8	126.8	278.1	187.8	173.4	217.2	230.1	304.4	253.7	3	629.691	8.27	0.0052	42.7303	7.779e-05	3.248e-05	3.33
174	High	[K].MVLEGYGVEK.[Y]	1xTMTpro [K10]; 1xTMTpro [N-Term]	0.000133789	1	3	2	A0A6P6WZV6	A0A6P6WZV6 [147-156]	A0A6P6WN17; A0A6P6WZV6; A0A6P6WUC0	0	1732.98	10	81.4	77.5	92.7	100.6	115.3	91.5	96.8	94.1	112.6	179.4	141.9	161.9	90.9	121	154.4	174.9	98.3	201.4	172.7	179.3	223.9	217.9	298.8	268.7	2	867.001	8.8	0.00763	40.8927	7.779e-05	1.416e-06	3.55
175	High	[K].MVGGVTPK.[K]	1xTMTpro [K8]; 1xTMTpro [N-Term]	0.000133789	1	1	1	A0A6P6VAZ5	A0A6P6VAZ5 [72-79]	A0A6P6VAZ5	0	1396.85	8	86.2	102.8	97.9	112	110.6	120.3	88.1	110.6	112.9	96.9	104.4	93.1	67	111.8	113.6	135.6	65.7	184.4	109.5	146.8	156.3	82	153.2	107.6	2	698.933	7.2	0.00503	26.7118	7.779e-05	0.0003357	2.51
176	High	[R].MVGESAEAVAAGLGGGSSSNK.[M]	1xTMTpro [K21]; 1xTMTpro [N-Term]	0.000133789	1	1	1	A0A6P6XIP3	A0A6P6XIP3 [231-251]	A0A6P6XIP3	0	2487.3	21	77.8	94.6	85.5	80.4	75.6	89.9	105.9	99.4	103.3	78.9	104.7	82.7	138.8	236.3	227.8	223.4	103.1	316.3	302.1	302.8	328.3	153.2	352.6	219.5	3	829.781	10.67	0.00884	41.4899	7.779e-05	6.369e-09	3.95
177	High	[K].MTPNITDITQPAR.[V]	1xTMTpro [N-Term]	0.000133789	1	1	1	A0A6P6XK57	A0A6P6XK57 [234-246]	A0A6P6XK57	0	1761.95	13	109.1	118.3	132.9	90	86.2	98.8	121.6	101.9	121.9	86.6	100.7	90.1	39.6	60.1	72	50.9	23.9	70.7	70.6	63.1	78.8	34.2	69	48.6	3	587.995	12.15	0.00714	36.9843	7.779e-05	0.0002261	4.04
178	High	[R].MTNNLSDPTIFTR.[K]	1xTMTpro [N-Term]	0.000133789	1	1	1	A0A6P6X0Z0	A0A6P6X0Z0 [32-44]	A0A6P6X0Z0	0	1813.94	13	89.9	110.2	103	65.7	70.3	78.3	86.8	84.8	93.2	67.5	81.5	70.2	141.7	243.2	242.5	161.3	84.7	243.2	218.8	228.2	261.6	115.8	242.3	164.5	2	907.48	5.4	0.0049	40.3939	7.779e-05	4.044e-05	2.3
179	High	[K].MTLFLKEDQLEYLEER.[R]	1xTMTpro [K6]; 1xTMTpro [N-Term]	0.000133789	1	2	1	A0A6P6S512	A0A6P6S512 [174-189]	A0A6P6S512; A0A6P6S4G6	1	2665.44	16	81.7	79.2	88.3	100.5	103.8	131.3	98.3	103.7	115.9	119	113.8	66.4	111.1	150.7	179.1	212.7	107.8	351.7	213.7	240.5	280.5	176	291.8	134.1	3	889.159	8.11	0.00721	48.1619	7.779e-05	6.726e-09	4.95
180	High	[R].MSEIPANETPFPHR.[A]	1xTMTpro [N-Term]	0.000133789	1	7	1	A0A6P6U6X2	A0A6P6U6X2 [419-432]	A0A6P6U6X2; A0A6P6UHF7; A0A6P6UBT3; A0A6P6UIP9; A0A6P6U6Q2; A0A6P6U7E6; A0A6P6UCI4	0	1929.98	14	96.7	114.7	106.2	78.9	74.9	95.4	101.4	119.7	100.9	63.4	99.8	65.1	29.6	49.1	48.5	37.6	17.5	57.5	49.6	62.5	55	21.1	57.6	29.6	3	644.002	5.05	0.00325	29.0391	7.779e-05	0.000188	2.6
181	High	[K].MQVNVTADHR.[I]	1xTMTpro [N-Term]	0.000133789	1	2	1	A0A6P6V569	A0A6P6V569 [432-441]	A0A6P6V569; A0A6P6V6B2	0	1474.78	10	99.7	110.1	105.2	90.6	92.6	90.1	112.8	122.4	102.5	64.7	93.8	94	36.4	56.2	57.3	51.5	25.8	64.8	65.8	76.2	66.6	25.7	64.6	51	3	492.267	7.94	0.0039	15.2875	7.779e-05	0.000154	3.11
182	High	[R].MQEAAGQLGQK.[T]	1xTMTpro [K11]; 1xTMTpro [N-Term]	0.000133789	2	2	11	A0A6P6T7P5; A0A6P6VFY2	A0A6P6T7P5 [132-142]; A0A6P6VFY2 [132-142]	A0A6P6T7P5; A0A6P6VFY2	0	1768.99	11	105.7	116.9	142.5	94.4	123.9	97.3	80.1	100.1	91.3	84	87	72.9	768.4	1188.2	1546.2	1069.1	687.8	1394.2	930.7	1241.3	1181.9	664	1193.4	787.1	2	885.003	6.41	0.00567	22.7389	7.779e-05	1.365e-08	4.88
183	High	[R].MQEAAGQLGQK.[T]	1xOxidation [M1]; 1xTMTpro [K11]	0.000133789	2	2	1	A0A6P6T7P5; A0A6P6VFY2	A0A6P6T7P5 [132-142]; A0A6P6VFY2 [132-142]	A0A6P6T7P5; A0A6P6VFY2	0	1480.77	11	156.6	110.4	117.6	88	201.4	69	75.6	96	70.2	157.5	70.6	88.6	122.4	120.7	137.2	107.1	120.2	106.2	94.4	128	97.7	133.9	104.1	102.9	2	740.894	4.08	0.00302	12.988	7.779e-05	1.133e-05	3.85
184	High	[K].MPTLEEYGTNLTK.[M]	1xTMTpro [K13]; 1xTMTpro [N-Term]	0.000133789	1	1	1	A0A6P6XIP3	A0A6P6XIP3 [252-264]	A0A6P6XIP3	0	2105.14	13	77.1	77.8	76.2	70.5	113.3	75.7	75.1	73	90.9	140.1	78.9	90.5	56.6	79.9	83.5	80.6	63.5	109.5	88.1	91.4	118.8	111.9	109.2	98.7	3	702.39	5.09	0.00357	43.9157	7.779e-05	0.0003205	3.31
185	High	[R].MPLEESYWESMK.[S]	1xTMTpro [K12]; 1xTMTpro [N-Term]	0.000133789	1	3	2	A0A6P6SUS0	A0A6P6SUS0 [509-520]	A0A6P6SUS0; A0A6P6WUT6; A0A6P6WRG6	0	2138.08	12	87.4	104.3	105.9	93.1	102.7	108.7	95.3	92.3	109.9	108.9	97.6	82.4	296.7	495.3	536.8	492.1	266.4	727.1	517.6	534.8	664.3	402.4	625	416	2	1069.55	10.29	0.011	47.1144	7.779e-05	5.789e-07	4.05
186	High	[K].MNVGVVLDEGLASPDDFYR.[V]	1xTMTpro [N-Term]	0.000133789	2	4	1	A0A6P6U6W8; A0A6P6UI13	A0A6P6U6W8 [197-215]; A0A6P6UI13 [200-218]	A0A6P6U6W8; A0A6P6U6I8; A0A6P6UI13; A0A6P6UG70	0	2401.2	19	87.4	111.3	115.8	76.2	60.5	96.6	95.6	95.4	112.8	64	89	72.4	123.9	220.8	245.2	168.4	65.5	269.9	216.9	230.9	284.9	98.7	238	152.7	2	1201.11	6.33	0.00759	49.7993	7.779e-05	1.002e-12	4.93
187	High	[K].MNFAEIEK.[E]	1xTMTpro [K8]; 1xTMTpro [N-Term]	0.000133789	1	3	1	A0A6P6S6C7	A0A6P6S6C7 [355-362]	A0A6P6S6C7; A0A6P6SEP2; A0A6P6S831	0	1589.89	8	78.4	89.8	105.6	97.3	127	110.3	88.6	91.8	109.1	145.4	112.1	167	91.6	146.8	184	176.9	113.3	253.8	165.5	182.9	227	184.7	247	289.9	2	795.453	8.23	0.00654	40.747	7.779e-05	0.0003552	3.08
188	High	[K].MNAPVVTIDGHEMVPANDENALMK.[A]	1xOxidation [M13]; 1xTMTpro [K24]; 1xTMTpro [N-Term]	0.000133789	1	1	2	A0A6P6VAA7	A0A6P6VAA7 [226-249]	A0A6P6VAA7	0	3220.63	24	86.5	90.5	88	70.7	170.2	78.3	79.6	83	103.5	223.1	93.8	91.3	297.5	435.3	451.6	378.5	447	530.8	437.7	486.9	633.9	834.6	608.6	466.6	3	1074.22	1.59	0.00171	39.7195	7.779e-05	0.0002859	3.95
189	High	[K].MNAPVVTIDGHEMVPANDENALMK.[A]	1xTMTpro [K24]; 1xTMTpro [N-Term]	0.000133789	1	1	2	A0A6P6VAA7	A0A6P6VAA7 [226-249]	A0A6P6VAA7	0	3204.63	24	74	78.9	80.2	65.5	154.3	82.8	74.4	80.4	107.6	236.6	91.8	93	277.7	414.1	449.5	383.2	442.2	612.2	446.7	515	719.4	966.4	650.3	518.7	3	1068.89	3.52	0.00376	43.8722	7.779e-05	8.359e-13	5.06
190	High	[K].MNAPAVTIDGHEMVPANDENALMK.[A]	1xOxidation [M13]; 1xTMTpro [K24]; 1xTMTpro [N-Term]	0.000133789	1	1	1	A0A6P6UXR6	A0A6P6UXR6 [226-249]	A0A6P6UXR6	0	3192.6	24	82.5	99.4	91.2	73.2	122.6	81.4	89.8	89.8	92.9	121.6	84	70.8	116.9	197.1	192.9	161.5	132.6	227.2	203.3	217.1	234.3	187.4	224.4	149.1	3	1064.88	7.13	0.00759	38.9314	7.779e-05	4.832e-09	4.68
191	High	[K].MNAPAVTIDGHEMVPANDENALMK.[A]	1xTMTpro [K24]; 1xTMTpro [N-Term]	0.000133789	1	1	2	A0A6P6UXR6	A0A6P6UXR6 [226-249]	A0A6P6UXR6	0	3176.6	24	69.7	79.4	86.9	68.9	203.9	86.5	72.7	79.7	103.8	207.1	74.1	71.3	220	350.5	409.4	338.9	491.5	538.2	366.7	429.4	583.1	711	441.2	334.3	3	1059.54	5.06	0.00536	42.6675	7.779e-05	1.351e-12	5.73
192	High	[K].MNADGAGLQGSGWVWLGLDK.[E]	1xTMTpro [K20]; 1xTMTpro [N-Term]	0.000133789	2	2	3	A0A6P6W7U3; A0A6P6VQI3	A0A6P6W7U3 [140-159]; A0A6P6VQI3 [140-159]	A0A6P6W7U3; A0A6P6VQI3	0	2683.42	20	73.4	85.2	73	102.9	138.4	100.2	93.5	91.4	98.6	152.3	141	138.1	177.5	288.1	263.3	387.5	255.6	477.6	361.3	376.8	424.4	400.6	642.9	496.4	3	895.147	4.29	0.00383	51.6197	7.779e-05	9.639e-12	5.81
193	High	[R].MLTSLDAGDSIVVAK.[S]	1xTMTpro [K15]; 1xTMTpro [N-Term]	0.000133789	1	2	1	A0A6P6S900	A0A6P6S900 [82-96]	A0A6P6SC07; A0A6P6S900	0	2128.22	15	71.5	72	73.2	87.2	165.6	106.9	82.7	85.1	106.2	204.3	122.2	124.5	42.8	60.3	65.4	81.3	75.7	126.1	79.1	86.9	113.2	133	138	110.7	3	710.085	9.93	0.00705	46.9953	7.779e-05	4.8e-07	3.72
194	High	[K].MISNCDGTSK.[L]	1xCarbamidomethyl [C5]; 1xTMTpro [K10]; 1xTMTpro [N-Term]	0.000133789	1	3	2	A0A6P6T1I3	A0A6P6T1I3 [410-419]	A0A6P6T1I3; A0A6P6T2W0; A0A6P6T0Q1	0	1720.89	10	113	121.4	149.7	88.4	89	92.3	85.9	85.3	100.9	69.7	71.4	67.5	362.6	544.9	716.8	441.8	218.2	583.5	440.9	467.2	576.8	243.5	432	322.1	2	860.953	7.27	0.00626	19.04	7.779e-05	3.103e-06	3.87
195	High	[K].MIPTKPMVVETFSEYPPLGR.[F]	1xTMTpro [K5]; 1xTMTpro [N-Term]	0.000133789	2	2	2	A0A6P6XH24; A0A6P6X663	A0A6P6XH24 [392-411]; A0A6P6X663 [392-411]	A0A6P6XH24; A0A6P6X663	0	2900.59	20	85.5	106.9	96.1	97.7	113.7	106.8	84	85.8	98.9	104	102.4	94.8	181.1	316.6	303.6	322.2	183.9	445.6	284.5	310.1	372.8	239.6	408.9	298.3	4	725.906	3.54	0.00256	48.4841	7.779e-05	1.115e-05	2.69
196	High	[K].MIGQTNIHGPAGDVFHDVFSK.[R]	1xTMTpro [K21]; 1xTMTpro [N-Term]	0.000133789	1	1	1	A0A6P6V7K7	A0A6P6V7K7 [7-27]	A0A6P6V7K7	0	2878.52	21	49.1	65	58.3	140.8	325	156.5	86.4	81.8	97.4	132.6	74.4	72.1	36.8	68.2	65.3	164.5	186.2	231.4	103.6	104.7	130.1	108.2	105.3	80.4	4	720.392	10.41	0.00749	44.4681	7.779e-05	1.491e-09	5.41
197	High	[R].LVVEDFMPLPSK.[G]	1xOxidation [M7]; 1xTMTpro [K12]; 1xTMTpro [N-Term]	0.000133789	1	2	4	A0A6P6T9X0	A0A6P6T9X0 [175-186]	A0A6P6T9X0; A0A6P6TJB6	0	1999.14	12	89.5	93.2	98.5	98.5	132.4	103.7	97.1	91.9	97.6	133.1	95.5	95.7	319.3	465.4	524.8	547.5	360.7	729.1	553.8	559.3	620.3	516.8	642.7	507.8	3	667.057	7.31	0.00487	46.9898	7.779e-05	5.341e-05	2.85
198	High	[-].MDAAKLEELEK.[F]	1xAcetyl [N-Term]; 2xTMTpro [K5; K11]	0.000133789	2	2	1	A0A6P6TRN0; A0A6P6U2K2	A0A6P6TRN0 [1-11]; A0A6P6U2K2 [1-11]	A0A6P6TRN0; A0A6P6U2K2	1	1927.07	11	105.3	103.7	108.4	95.4	130.2	117.8	86.5	97	113.6	88.8	84.2	61.2	80.8	111.3	124.1	114	76.3	178.2	106.1	127	155.2	74.1	121.9	69.8	3	643.034	9.62	0.00618	44.5293	7.779e-05	0.0001637	3.66
199	High	[R].MAEAFTVLR.[D]	1xTMTpro [N-Term]	0.000133789	1	2	1	A0A6P6T7T3	A0A6P6T7T3 [140-148]	A0A6P6T7T3; A0A6P6VFV2	0	1341.75	9																									2	671.385	8.57	0.00575	43.8184	7.779e-05	6.004e-05	2.14
200	High	[R].IYAIFGNAGEDLREPTEYGPYSSVR.[D]	1xTMTpro [N-Term]	0.000133789	1	1	8	A0A6P6T6X1	A0A6P6T6X1 [146-170]	A0A6P6T6X1	1	3108.56	25	99.5	143.2	123.1	80.1	47.4	97.1	108.2	99.5	108.6	54.9	105.6	74.4	497.2	1001.6	918.4	623.7	180.9	956.8	865.1	848.9	967.3	298.6	995.9	552.9	3	1036.87	7.36	0.00762	47.4859	7.779e-05	8.652e-15	4.97
201	High	[R].IYAIFGNAGEDLR.[E]	1xTMTpro [N-Term]	0.000133789	1	1	3	A0A6P6T6X1	A0A6P6T6X1 [146-158]	A0A6P6T6X1	0	1742.94	13	95.5	129.6	120.9	94.3	55.6	100.9	109.1	104.2	112.3	60.3	108.6	100.6	111.9	212.5	211.5	172.1	49.8	233	204.4	208.3	234.4	76.9	240.1	175.3	2	871.982	10.28	0.00896	48.5989	7.779e-05	3.197e-06	2.81
202	High	[K].LYALDDQLHLGNK.[V]	1xTMTpro [K13]; 1xTMTpro [N-Term]	0.000133789	1	1	4	A0A6P6SRN2	A0A6P6SRN2 [136-148]	A0A6P6SRN2	0	2108.2	13	79.4	76.1	75.8	121.4	131.3	130.6	111.6	97.2	106.6	108.5	109.3	97.4	191.8	257	273.2	456.5	242.2	621.4	430.7	400.6	458.3	285.1	497.8	349.7	2	1054.61	6.93	0.0073	43.4511	7.779e-05	3.335e-09	3.72
203	High	[R].IWVLDGGLPR.[W]	1xTMTpro [N-Term]	0.000133789	1	3	1	A0A6P6SFM5	A0A6P6SFM5 [191-200]	A0A6P6SFM5; A0A6P6SEU6; A0A6P6S6N1	0	1429.85	10	81.8	113.4	105.2	94.6	70.3	92.1	112.4	103.3	102	96.5	190.1	175.7	47.7	92.5	91.6	85.9	31.3	105.8	104.8	102.8	105.9	61.2	209.1	152.3	2	715.434	8.99	0.00642	48.9186	7.779e-05	1.246e-06	2.86
204	High	[R].LWTPYDNLAK.[N]	1xTMTpro [K10]; 1xTMTpro [N-Term]	0.000133789	1	1	1	A0A6P6UEM8	A0A6P6UEM8 [476-485]	A0A6P6UEM8	0	1829.05	10	85.9	88.5	100	95.9	98.6	106.4	89.9	91.4	99.8	75.9	85.3	82.5	174.9	252.2	303.9	304.1	153.4	427.1	292.7	317.7	362.1	168.2	327.8	249.7	2	915.033	7.43	0.0068	46.0335	7.779e-05	5.64e-05	3.87
205	High	[K].IWTPAQDLPK.[T]	1xTMTpro [K10]; 1xTMTpro [N-Term]	0.000133789	1	4	1	A0A6P6TXT0	A0A6P6TXT0 [309-318]	A0A6P6TXT0; A0A6P6TWP2; A0A6P6TWP5; A0A6P6TWQ0	0	1777.05	10	90	108.9	94.2	95.2	96	117.6	111.2	122.2	117.4	101.8	113.2	100.4	151.6	256.8	237	249.9	123.5	390.4	299.6	351.2	352.2	186.7	359.8	251.5	2	889.034	6.03	0.00535	44.7885	7.779e-05	0.0002105	3.37
206	High	[R].LWSDREATSAPDTK.[L]	1xTMTpro [K14]; 1xTMTpro [N-Term]	0.000133789	1	2	1	A0A6P6W7R8	A0A6P6W7R8 [496-509]	A0A6P6VNH1; A0A6P6W7R8	1	2185.17	14	105.6	116.1	113.6	86	93.1	106.6	88.5	102.5	105.8	66.8	87.1	44	190.6	293.2	306.1	241.6	128.3	379	255.5	315.7	339.9	131.1	296.4	118	3	729.068	6.93	0.00505	27.5249	7.779e-05	5.484e-05	3.93
207	High	[K].IWPEDILPLQPVGR.[L]	1xTMTpro [N-Term]	0.000133789	1	1	5	A0A385CIB6	A0A385CIB6 [292-305]	A0A385CIB6	0	1937.12	14	104.4	102.2	132.6	97.6	79.1	105.9	90.4	93.2	88.3	96.3	103.7	101.9	413	565.7	782.8	601.3	239	825.5	571.5	629	622.2	414.6	773.5	599.4	2	969.071	8.58	0.00831	52.4864	7.779e-05	2.013e-06	3.17
208	High	[R].IWGTHNDFVLR.[N]	1xTMTpro [N-Term]	0.000133789	1	1	1	A0A6P6XAI4	A0A6P6XAI4 [84-94]	A0A6P6XAI4	0	1661.91	11	70.4	87.8	83.5	80.2	66	93	92.5	91.2	94.1	72.4	107.8	81.9	50.4	88	89.3	89.4	36.1	131.3	105.9	111.4	120	56.4	145.6	87.2	3	554.645	7.13	0.00395	40.718	7.779e-05	7.345e-07	4.08
209	High	[R].IWDSETGK.[L]	1xTMTpro [K8]; 1xTMTpro [N-Term]	0.000133789	1	1	2	A0A6P6UVR7	A0A6P6UVR7 [172-179]	A0A6P6UVR7	0	1543.86	8	86	94.9	98.6	92.8	85.5	105.7	96.3	98.2	99.2	88	95.2	85	188	290.1	321.7	315.9	142.7	455.2	336.3	366	385.9	209.3	392.5	276.2	2	772.44	7.01	0.00541	32.2163	7.779e-05	7.328e-05	2.54
210	High	[K].IWDHSNGDVAIDFYHR.[Y]	1xTMTpro [N-Term]	0.000133789	1	4	1	A0A6P6VUP1	A0A6P6VUP1 [77-92]	A0A6P6VUP1; A0A6P6VWD8; A0A6P6VUQ0; A0A6P6WEX0	0	2249.11	16	85.8	84.8	78.6	70.8	122.7	78.6	93	83.5	79.5	92.1	92.9	75.2	73.2	101.3	100.1	94.1	80	132.2	126.9	121.6	120.9	85.5	149.5	95.4	4	563.036	6.83	0.00384	37.7043	7.779e-05	3.291e-05	4.03
211	High	[R].LWDFSVSLTKPNDS.[-]	1xTMTpro [K10]; 1xTMTpro [N-Term]	0.000133789	1	4	1	A0A6P6W843	A0A6P6W843 [305-318]	A0A6P6VL70; A0A6P6W843; A0A6P6VL36; A0A6P6W4F8	0	2217.2	14	142.9	124.8	139.9	96.6	115.4	107.3	88.9	101.9	92.9	90.6	85.4	83.9	121	147.8	176.8	127.4	74.6	179	120.3	147.2	140.1	83.5	136.4	105.6	3	739.746	8.08	0.00598	50.7017	7.779e-05	2.396e-06	3.84
212	High	[K].LWCADLSPER.[V]	1xCarbamidomethyl [C3]; 1xTMTpro [N-Term]	0.000133789	1	2	1	A0A6P6SXS1	A0A6P6SXS1 [89-98]	A0A6P6SXS1; A0A6P6SL92	0	1550.8	10	95.4	122.7	124.1	117.8	65.2	132.6	121.7	112.9	136.2	73.9	117.2	102.9	43.9	79	85.2	84.4	22.9	120.2	89.5	88.6	111.6	37	101.7	70.4	2	775.908	8.63	0.00669	40.689	7.779e-05	0.0001534	2.57
213	High	[K].LWAALEEFDKR.[A]	1xTMTpro [K10]; 1xTMTpro [N-Term]	0.000133789	2	3	1	A0A6P6TX63; A0A6P6TTD5	A0A6P6TX63 [233-243]; A0A6P6TTD5 [270-280]	A0A6P6TX63; A0A6P6TTD5; A0A6P6TUW1	1	1986.13	11	59.3	59.9	62.2	79.8	101.3	86.9	116.4	103.4	119.6	191	170.1	245	53	74.8	82.9	111	69.1	152.9	166.2	157.6	190.2	185.6	286.5	325.2	3	662.722	10.2	0.00675	49.6878	7.779e-05	1.029e-06	4.22
214	High	[K].LVYSGSDGK.[L]	1xTMTpro [K9]; 1xTMTpro [N-Term]	0.000133789	1	2	3	A0A6P6X5T5	A0A6P6X5T5 [601-609]	A0A6P6X5T5; A0A6P6X541	0	1533.88	9	97.4	96.6	104.6	95.6	78.5	101.8	86.9	98.2	91.5	90.2	91.5	94.6	226.5	314.1	362.9	346.2	139.4	466.4	322.9	389.3	378.7	228.1	401.4	326.7	2	767.445	4.25	0.00326	27.4316	7.779e-05	0.0001588	3.36
215	High	[R].IVYSALDVDKELQPDK.[V]	2xTMTpro [K10; K16]; 1xTMTpro [N-Term]	0.000133789	1	2	1	A0A6P6W3L4	A0A6P6W3L4 [21-36]	A0A6P6W3L4; A0A6P6W3V0	1	2745.59	16	107.6	97.1	102.6	107.4	130.7	117.7	93.4	97.7	107.7	142.8	91.4	117.7	66.6	84.1	94.8	103.6	61.8	143.6	92.5	103.2	118.7	96.2	106.7	108.3	4	687.158	9.48	0.0065	45.5878	7.779e-05	2.889e-06	4.14
216	High	[K].LVYGSTVPVLDGEK.[L]	1xTMTpro [K14]; 1xTMTpro [N-Term]	0.000133789	1	3	1	A0A6P6VLM6	A0A6P6VLM6 [578-591]	A0A6P6VLM6; A0A6P6W8U8; A0A6P6VN79	0	2085.21	14	73.1	43	53.9	103.8	173.6	114	101.1	117.7	119.1	167.5	117.8	142.9	20.9	17.2	23	46.2	37.9	64.2	46.2	57.4	60.6	52.1	63.5	60.7	3	695.746	6.76	0.0047	45.1616	7.779e-05	0.0001883	3.6
217	High	[R].IVYCNDIVPR.[V]	1xCarbamidomethyl [C4]; 1xTMTpro [N-Term]	0.000133789	1	1	1	A0A6P6T6J2	A0A6P6T6J2 [203-212]	A0A6P6T6J2	0	1552.85	10	108.9	111	110.3	91.3	85.1	92.7	94	103.2	87.4	80.8	81.5	82.1	216.1	308.2	326.6	282.3	128.9	362.6	298.2	349.5	309	174.5	305	242.1	2	776.929	2.62	0.00203	38.0325	7.779e-05	0.0002785	2.69
218	High	[K].IVVVDSDMPGGEPQK.[R]	1xTMTpro [K15]; 1xTMTpro [N-Term]	0.000133789	1	2	2	A0A6P6XI88	A0A6P6XI88 [335-349]	A0A6P6X6Y0; A0A6P6XI88	0	2179.19	15	79.7	89.2	101.3	95.7	103.1	101.4	87.1	94.4	99.6	106.9	91.6	90.5	137.7	215.4	261.1	257.4	136	344.9	240.4	278	306.4	200.9	298.5	232.4	3	727.075	8.79	0.00639	39.6465	7.779e-05	3.296e-06	3.29
219	High	[K].LVVVDFTASWCGPCR.[F]	2xCarbamidomethyl [C11; C14]; 1xTMTpro [N-Term]	0.000133789	1	1	1	A0A6P6UNE6	A0A6P6UNE6 [30-44]	A0A6P6UNE6	0	2071.04	15	95.8	101.7	113.1	124.7	57.3	114.9	124.3	127.8	116.2	128.2	151.4	167.9	17.3	25.7	30.5	35.1	7.9	40.9	35.9	39.4	37.4	25.2	51.6	45.1	3	691.025	8.65	0.00597	50.3992	7.779e-05	5.322e-07	4.04
220	High	[K].LVVSTSSSLLHTAVDLVNEPK.[L]	1xTMTpro [K21]; 1xTMTpro [N-Term]	0.000133789	1	1	1	A0A6P6SM43	A0A6P6SM43 [322-342]	A0A6P6SM43	0	2817.62	21	90	77.8	73.6	85.3	201.2	72.3	74.6	73.2	77.4	258.7	85.8	128.9	59.8	72.3	73	88.3	102.1	94.7	79.2	83	91.6	187	107.5	127.3	4	705.169	11.44	0.00806	51.4046	7.779e-05	1.477e-05	3.47
221	High	[R].LVVSGIEFSMDKYVK.[F]	1xOxidation [M10]; 2xTMTpro [K12; K15]; 1xTMTpro [N-Term]	0.000133789	2	3	1	A0A6P6SDS1; A0A6P6SDS2	A0A6P6SDS1 [481-495]; A0A6P6SDS2 [481-495]	A0A6P6SDS1; A0A6P6SDS2; A0A6P6SDQ3	1	2643.52	15	99	87.6	95.4	70.9	82.8	74.9	103.9	114.2	120.5	228.2	140.7	88.2	98.6	122	141.8	110	63	146.9	165.5	194	213.7	247.3	264.4	130.5	4	661.642	8.51	0.00562	45.2846	7.779e-05	6.755e-05	2.88
222	High	[R].LVVSGIEFSMDK.[Y]	1xOxidation [M10]; 1xTMTpro [K12]; 1xTMTpro [N-Term]	0.000133789	2	3	1	A0A6P6SDS1; A0A6P6SDS2	A0A6P6SDS1 [481-492]; A0A6P6SDS2 [481-492]	A0A6P6SDS1; A0A6P6SDS2; A0A6P6SDQ3	0	1949.09	12	112.5	102.6	137.3	55.7	68.7	66.3	93.7	96.8	110	171.4	137	230.5	113.6	145	206.9	87.6	53	132	151.3	166.8	197.8	188.3	260.9	346	2	975.058	9.12	0.00889	45.4086	7.779e-05	2.408e-07	3.33
223	High	[R].IVVNASIENWLPLPR.[M]	1xTMTpro [N-Term]	0.000133789	1	1	2	A0A6P6UJZ2	A0A6P6UJZ2 [179-193]	A0A6P6UJZ2	0	2025.18	15	82.4	95.7	92.7	97.7	58	100.3	84.8	91	80	100.9	198.4	204.6	151	245.3	253.4	278.8	81.2	362.1	248.4	284.5	261.1	201.1	685.7	557.2	3	675.737	7.14	0.00482	54.0434	7.779e-05	2.659e-09	5.31
224	High	[K].LVVIVDVIDQNR.[A]	1xTMTpro [N-Term]	0.000133789	1	1	2	A0A6P6UVY5	A0A6P6UVY5 [24-35]	A0A6P6UVY5	0	1687.01	12	99.8	113.7	122.5	130.7	87.3	139.7	111.5	110.3	98.5	92.4	109	113.5	72.1	115	132.1	147.1	48.2	199	128.8	136	126.8	72.7	148.6	121.9	2	844.015	9.14	0.00771	52.5123	7.779e-05	1.141e-07	3.66
225	High	[K].IVVGNNFDEIVLEESK.[D]	1xTMTpro [K16]; 1xTMTpro [N-Term]	0.000133789	1	1	1	A0A6P6U8K1	A0A6P6U8K1 [451-466]	A0A6P6U8K1	0	2413.35	16	110.4	103.1	109.9	112.8	137.1	99.3	92.3	94.2	90.1	111.9	83.1	101.1	36.9	48.2	54.8	58.7	35	65.4	49.3	53.7	53.6	40.7	52.4	50.2	3	805.129	10.58	0.00851	48.7925	7.779e-05	4.909e-07	4.76
226	High	[R].LVVETTANQDPLVTK.[G]	1xTMTpro [K15]; 1xTMTpro [N-Term]	0.000133789	2	2	7	A0A6P6W7U3; A0A6P6VQI3	A0A6P6W7U3 [164-178]; A0A6P6VQI3 [164-178]	A0A6P6W7U3; A0A6P6VQI3	0	2236.3	15	96	90.5	97.4	117.6	133.8	125	101.3	102.2	107.5	129	107.8	117.2	440.2	580.5	666.8	840.3	468.6	1129.8	742.6	799.6	878	644	932.6	798.7	2	1118.66	7.13	0.00797	42.525	7.779e-05	1.203e-10	6.27
227	High	[K].LVVELAPMEIR.[T]	1xOxidation [M8]; 1xTMTpro [N-Term]	0.000133789	1	2	2	A0A6P6X5T5	A0A6P6X5T5 [1006-1016]	A0A6P6X5T5; A0A6P6X541	0	1589.93	11	137.1	127.5	154.8	83.9	74.5	89.2	95.7	108	113.6	90.6	84.9	90.7	161.2	209.8	271.7	153.7	66.9	206.6	179.9	216.6	237.9	115.9	188.4	158.6	3	530.65	5.33	0.00283	45.0085	7.779e-05	9.623e-06	3.83
228	High	[K].LVVELAPMEIR.[T]	1xTMTpro [N-Term]	0.000133789	1	2	3	A0A6P6X5T5	A0A6P6X5T5 [1006-1016]	A0A6P6X5T5; A0A6P6X541	0	1573.93	11	114.9	130.6	144	103.6	49.4	113.7	92.7	99.3	115.7	84.4	104.6	114.8	166.2	264.4	311	233.5	54.6	324.2	214.4	245.2	298.2	132.9	285.5	247	2	787.476	8.41	0.00662	49.0591	7.779e-05	6.126e-05	4
229	High	[K].IYATIDLEK.[A]	1xTMTpro [K9]; 1xTMTpro [N-Term]	0.000133789	1	2	2	A0A6P6XI88	A0A6P6XI88 [50-58]	A0A6P6X6Y0; A0A6P6XI88	0	1674	9	70.6	86.2	93.4	119	132.9	130.3	111.4	119.1	122.9	141.7	118.8	117.9	169.9	290.1	335.3	445.9	244.1	617.8	428.6	488.9	526.6	371	538.9	421.5	2	837.51	9.15	0.00766	44.2368	7.779e-05	7.046e-05	3.34
230	High	[R].MAPEEALGEILQVPR.[G]	1xTMTpro [N-Term]	0.000133789	1	1	1	A0A6P6TSS0	A0A6P6TSS0 [86-100]	A0A6P6TSS0	0	1957.07	15	77.2	104.5	101.7	96.3	92.6	106.4	121	104.4	93.5	106.8	135.1	118.4	51.1	96.7	100.4	99.2	46.8	138.8	128	117.9	110.2	76.9	168.7	116.5	3	653.035	8.53	0.00557	51.1464	7.779e-05	1.977e-06	4.24
231	High	[K].IYDDEGFK.[Y]	1xTMTpro [K8]; 1xTMTpro [N-Term]	0.000133789	2	2	5	A0A6P6VEE2; A0A6P6SCM7	A0A6P6VEE2 [110-117]; A0A6P6SCM7 [110-117]	A0A6P6VEE2; A0A6P6SCM7	0	1594.86	8	87.7	79.2	82.5	111.3	104.2	119.9	100.5	106.1	116.3	133.6	118.4	127.9	562.4	711.1	790.4	1112.7	510.5	1516.6	1031.1	1162.1	1329.5	933	1433.5	1220	2	797.939	6	0.00478	33.4539	7.779e-05	0.0002789	2.19
232	High	[K].LYDFINANSTFVLDEAER.[N]	1xTMTpro [N-Term]	0.000133789	2	2	1	A0A6P6UTE2; A0A6P6UPM9	A0A6P6UTE2 [268-285]; A0A6P6UPM9 [304-321]	A0A6P6UTE2; A0A6P6UPM9	0	2421.23	18	130.2	151.4	119.6	99.1	103.5	97.3	123.3	125.7	92	101.9	112.3	111.5	34.4	56	47.2	40.8	20.9	50.7	52.1	56.7	43.3	29.3	56	43.8	3	807.754	9.54	0.0077	51.0746	7.779e-05	7.258e-08	4.16
233	High	[K].MADDCIGEQVEK.[L]	1xCarbamidomethyl [C5]; 1xTMTpro [K12]; 1xTMTpro [N-Term]	0.000133789	2	2	2	A0A6P6V940; A0A6P6V011	A0A6P6V940 [94-105]; A0A6P6V011 [94-105]	A0A6P6V940; A0A6P6V011	0	2003.01	12	86.8	89.6	104.2	99.9	113.9	106.7	88.2	90.4	107.1	110.2	106.2	89.5	248.8	359.3	445.9	446.2	249.5	602.9	404.3	442.3	546.9	343.7	574.3	381.3	2	1002.02	9.06	0.00907	28.8577	7.779e-05	2.691e-08	4.27
234	High	[K].LYWGIAADGSVVISDDIAVIK.[A]	1xTMTpro [K21]; 1xTMTpro [N-Term]	0.000133789	1	1	7	A0A6P6S5C1	A0A6P6S5C1 [161-181]	A0A6P6S5C1	0	2813.59	21	100.3	104.6	103.5	108.5	144.5	117	101.7	104	105.9	136.1	106.8	97.2	179.1	261.3	276	301.8	197.1	411.7	290.5	316.9	336.9	264.4	359.9	258	3	938.538	1.41	0.00132	56.0441	7.779e-05	5.042e-06	2.25
235	High	[R].IYVVTDSGDDDPVTPKPGTLR.[Y]	1xTMTpro [K16]; 1xTMTpro [N-Term]	0.000133789	1	2	2	A0A6P6X5H3	A0A6P6X5H3 [140-160]	A0A6P6X5H3; A0A6P6XDU0	0	2853.55	21	36.2	222.6	196.1	85.7	64	85.9	108.5	116.3	120.8	98.5	93.2	91	70	602	565.8	258.1	94.5	327.2	335.4	383.6	415.8	207.2	339.7	261.4	3	951.86	5.76	0.00548	40.3765	7.779e-05	1.6e-13	3.67
236	High	[K].LYVSNLDVGVTNEDIR.[E]	1xTMTpro [N-Term]	0.000133789	1	1	1	A0A6P6TIN0	A0A6P6TIN0 [97-112]	A0A6P6TIN0	0	2111.13	16	86.6	98.2	100.4	81.7	85.7	92.8	93.4	89.6	87.5	72.7	87.5	80.6	75.8	120.3	131.2	111.4	57.3	160	130.7	133.8	136.4	69.2	144.4	104.9	3	704.387	7.31	0.00514	44.0441	7.779e-05	7.865e-05	3.79
237	High	[R].IYVPEGHPLK.[C]	1xTMTpro [K10]; 1xTMTpro [N-Term]	0.000133789	1	1	1	A0A6P6SV03	A0A6P6SV03 [389-398]	A0A6P6SV03	0	1761.06	10	71.8	75.6	74.6	151.8	159.1	142.7	89.3	84.7	101.2	112.8	114.1	129.6	115.7	170.4	179.4	381.2	195.8	453.3	230.1	232.9	290.6	197.9	347	310.4	3	587.693	5.4	0.00317	31.2052	7.779e-05	1.393e-05	3.06
238	High	[K].IYVGNIPFEISSER.[L]	1xTMTpro [N-Term]	0.000133789	1	3	1	A0A6P6VSK3	A0A6P6VSK3 [176-189]	A0A6P6VSK3; A0A6P6W8Z7; A0A6P6VR16	0	1928.04	14	90.1	97.8	102.1	112.2	101.3	113.2	117.5	108.8	123.1	143.9	92	98.9	28.2	42.8	47.7	54.7	24.2	69.8	58.8	58.1	68.6	49	54.3	46	3	643.361	11.9	0.00765	47.9393	7.779e-05	0.0001991	3.12
239	High	[R].LYTGYHDIISLR.[N]	1xTMTpro [N-Term]	0.000133789	1	1	1	A0A6P6XI33	A0A6P6XI33 [141-152]	A0A6P6XI33	0	1754.98	12	109.9	108.3	103.6	102.7	67	83.9	99.4	102.5	95.2	98.4	131	124.2	30.9	42.6	43.5	45	14.4	46.5	44.7	49.2	47.7	30.1	69.5	51.9	3	585.668	8.21	0.00481	41.2002	7.779e-05	1.701e-08	4.45
240	High	[K].LYSSLWEADDWATR.[G]	1xTMTpro [N-Term]	0.000133789	1	2	1	A0A6P6VLG6	A0A6P6VLG6 [158-171]	A0A6P6VLG6; A0A6P6WHJ4	0	2017	14	66.6	90.1	72.7	71	60	96	125.7	132.9	132.5	62.6	108.1	75	109.7	207.7	178.7	182.2	75.5	311.5	331.1	373.6	388.5	112.2	335.9	183.7	2	1009.01	6.09	0.00615	48.3781	7.779e-05	3.415e-08	3.73
241	High	[K].IYSGSLQK.[R]	1xTMTpro [K8]; 1xTMTpro [N-Term]	0.000133789	1	1	1	A0A6P6TAJ2	A0A6P6TAJ2 [114-121]	A0A6P6TAJ2	0	1503.9	8	87.6	112.3	97.9	104.8	109.4	102.9	121.6	113.3	105.3	100.2	112.6	107.3	142.2	255	237.2	264.9	135.6	328.9	315.4	313.7	304.2	176.9	344.8	258.8	2	752.461	7.95	0.00597	30	7.779e-05	0.0003775	2.57
242	High	[R].LYQMQANGTLLFPAINVNDSVTK.[S]	1xOxidation [M4]; 1xTMTpro [K23]; 1xTMTpro [N-Term]	0.000133789	2	2	2	A0A6P6WTN4; A0A6P6WUJ0	A0A6P6WTN4 [213-235]; A0A6P6WUJ0 [213-235]	A0A6P6WTN4; A0A6P6WUJ0	0	3161.72	23	78.1	78.6	81.2	109.8	141.2	106.6	94.4	97	98.9	144.4	116.3	125.7	143.8	202.5	223.3	315.1	198.6	386.9	278.1	305	324.3	289.5	404.1	344.2	4	791.191	8.32	0.00657	49.5663	7.779e-05	4.269e-10	6.44
243	High	[R].LYQAVVEAGIK.[A]	1xTMTpro [K11]; 1xTMTpro [N-Term]	0.000133789	1	2	2	A0A6P6XB00	A0A6P6XB00 [173-183]	A0A6P6X9A5; A0A6P6XB00	0	1799.09	11	97.1	107.9	112.8	87.2	114.5	72.1	92.3	80.7	79.1	146.5	177.1	154	148.9	231.4	258.2	208.2	134.1	217.8	226.2	211.1	215.9	244.4	512.2	350.9	2	900.057	8.53	0.00768	46.2668	7.779e-05	4.785e-08	4.53
244	High	[R].LYPTRDPVMENSFAR.[K]	1xTMTpro [N-Term]	0.000133789	1	3	2	A0A6P6UQF4	A0A6P6UQF4 [222-236]	A0A6P6UHV5; A0A6P6UQL0; A0A6P6UQF4	1	2100.09	15	110.8	150.7	151	83.7	67.7	101.3	102.8	107.7	124	63.5	92.8	61.3	127.2	242.2	258.9	149.7	59.4	229.2	188.8	211	253.7	79.3	201.1	104.7	3	700.705	6.3	0.00441	32.5634	7.779e-05	1.73e-06	4.23
245	High	[R].IYNFSPQNPIDPTLNR.[A]	1xTMTpro [N-Term]	0.000133789	2	2	2	A0A6P6THJ8; A0A6P6T4J5	A0A6P6THJ8 [216-231]; A0A6P6T4J5 [216-231]	A0A6P6THJ8; A0A6P6T4J5	0	2193.16	16	98	121.7	103.6	82	79.2	100.4	114.5	112	114.9	94.8	132.9	94.9	139.1	241.8	219.5	181.4	85.9	280.9	260	271.4	290.4	146.5	356	200.3	2	1097.09	8.49	0.00931	44.4983	7.779e-05	1.189e-07	4.13
246	High	[R].LYMEARPLEEGLAEAIDDGR.[I]	1xOxidation [M3]; 1xTMTpro [N-Term]	0.000133789	1	2	2	A0A6P6U1Q3	A0A6P6U1Q3 [587-606]	A0A6P6U1Q3; A0A6P6TR19	0	2568.29	20	91	104.6	122.7	89.3	61.6	103.5	112.5	123	126.7	95.5	122.8	103.5	102.8	165.3	207	157.2	53.2	230.4	203.2	237.2	255	117.4	261.7	173.9	3	856.778	9.63	0.00824	46.5241	7.779e-05	1.306e-07	3.73
247	High	[R].LYMEARPLEEGLAEAIDDGR.[I]	1xTMTpro [N-Term]	0.000133789	1	2	1	A0A6P6U1Q3	A0A6P6U1Q3 [587-606]	A0A6P6U1Q3; A0A6P6TR19	0	2552.3	20	78.2	112.1	110.5	88.6	40.1	117.7	103.1	103.7	125	59.5	114.3	75.2	103.5	207.7	218.4	182.8	40.6	307.2	218.3	234.4	294.7	85.7	285.6	148	3	851.446	9.59	0.00815	48.8144	7.779e-05	2.041e-12	5.4
248	High	[R].IYLREEGVPGSQR.[G]	1xTMTpro [N-Term]	0.000133789	1	2	1	A0A6P6T710	A0A6P6T710 [423-435]	A0A6P6T710; A0A6P6TFQ1	1	1808	13	69.5	81.7	75.4	89.9	62.3	93.6	108.5	128.8	117.2	57.2	115.3	93	64.1	105.4	103.8	129.1	43.9	170.1	160	202.6	192.5	57.4	200.6	127.5	3	603.341	5.07	0.00305	24.3983	7.779e-05	6.316e-06	3.12
249	High	[R].LYKEPVPVTQLVR.[E]	1xTMTpro [K3]; 1xTMTpro [N-Term]	0.000133789	1	1	1	A0A6P6TIZ5	A0A6P6TIZ5 [100-112]	A0A6P6TIZ5	1	2150.32	13	50.8	54.4	54.7	100.7	108.3	96.7	86	86.6	88	130.2	137.8	134.7	44.1	66.1	70.9	136.1	71.8	165.5	119.3	128.2	136	123	225.7	173.8	3	717.448	5.32	0.00381	42.3579	7.779e-05	0.0002265	3.34
250	High	[K].LYHLETTLDHFK.[G]	1xTMTpro [K12]; 1xTMTpro [N-Term]	0.000133789	2	2	1	A0A6P6W7S7; A0A6P6VPS2	A0A6P6W7S7 [161-172]; A0A6P6VPS2 [161-172]	A0A6P6W7S7; A0A6P6VPS2	0	2125.19	12	80.7	87.9	79.1	97.9	118.6	97	105.9	100.3	96.8	155.6	122.4	150	60.8	92.6	88.9	114.8	68.2	144	127.5	128.9	129.9	127.5	173.9	167.9	4	532.058	7.12	0.00378	42.6774	7.779e-05	6.629e-05	3.37
251	High	[R].IYGLGTGPK.[V]	1xTMTpro [K9]; 1xTMTpro [N-Term]	0.000133789	1	2	1	A0A6P6VZ20	A0A6P6VZ20 [183-191]	A0A6P6VZ20; A0A6P6W2G6	0	1513.92	9	86.2	98.9	94.6	84.5	79.6	104.9	104.4	106.9	103.3	83.3	105.9	88.3	143.7	230.6	235.4	219.3	101.3	344.5	278.3	304.1	306.7	151.1	332.9	218.9	2	757.471	7.82	0.00592	36.5152	7.779e-05	0.0002659	2.57
252	High	[K].LYGIEPVESPVLSGGKPGPHK.[I]	2xTMTpro [K16; K21]; 1xTMTpro [N-Term]	0.000133789	1	2	1	A0A6P6WLH1	A0A6P6WLH1 [205-225]	A0A6P6X2Z5; A0A6P6WLH1	0	3073.79	21	74.7	75.1	72.3	85.4	187.6	87.7	81.7	81.3	83.8	145.4	89.4	76.5	163.5	229.9	236.1	291.2	313.6	378.2	286	303.5	326.6	346.3	369.3	248.9	4	769.207	6.96	0.00535	41.887	7.779e-05	6.653e-10	4.69
253	High	[K].LYGEFLINAQGEDVVAGIR.[T]	1xTMTpro [N-Term]	0.000133789	2	3	1	A0A6P6WRX8; A0A6P6WZ03	A0A6P6WRX8 [182-200]; A0A6P6WZ03 [360-378]	A0A6P6WRX8; A0A6P6WZ03; A0A6P6WWW2	0	2368.28	19	91.2	117.2	102.7	99.4	58.1	127.7	91.5	92.5	98.5	58.6	91.4	74.5	213.5	384	359	362.4	103.9	589.2	342.6	369.7	411	149.2	404	259.4	2	1184.65	6.22	0.00736	49.7043	7.779e-05	2.443e-13	4.45
254	High	[R].LYFHDCFVR.[G]	1xCarbamidomethyl [C6]; 1xTMTpro [N-Term]	0.000133789	2	2	1	A0A6P6SLM2; A0A6P6SX33	A0A6P6SLM2 [62-70]; A0A6P6SX33 [62-70]	A0A6P6SLM2; A0A6P6SX33	0	1560.8	9	80.1	103.5	106.2	133.3	76.9	123.4	93.3	89.4	92.5	88.5	142.4	132.7	31.5	57	62.4	81.7	23.1	95.7	58.7	60	64.8	37.9	105.7	77.6	3	520.941	8.19	0.00426	34.7751	7.779e-05	0.0002274	3.18
255	High	[R].LYEQQIEQLGNFQLR.[I]	1xTMTpro [N-Term]	0.000133789	1	1	2	A0A6P6SQQ6	A0A6P6SQQ6 [68-82]	A0A6P6SQQ6	0	2183.18	15	93.8	113.9	106.5	86.9	101.9	94.5	93.6	94.2	96.4	96.3	89.2	79.7	158.8	270	269.2	229.2	131.8	315.6	253.4	272.1	290.8	177.5	285	200.6	3	728.405	9.66	0.00703	47.1568	7.779e-05	7.107e-08	4.62
256	High	[K].LYEIGAGTSEIRR.[M]	1xTMTpro [N-Term]	0.000133789	1	2	1	A0A6P6U7Y1	A0A6P6U7Y1 [383-395]	A0A6P6U7Y1; A0A6P6W1T2	1	1768.99	13	112.2	129.8	117.5	115.8	58	162.5	147.1	132	147.3	75.9	108	76.1	37.5	60.7	58.6	60.3	14.8	107	78.6	75.3	87.7	27.6	68.1	37.8	3	590.337	4.51	0.00266	29.8908	7.779e-05	2.135e-07	3.61
257	High	[R].IYEEPQKETSRPGLGWTESQK.[-]	2xTMTpro [K7; K21]; 1xTMTpro [N-Term]	0.000133789	1	3	1	A0A6P6SLD5	A0A6P6SLD5 [119-139]	A0A6P6SLD5; A0A6P6SXH1; A0A6P6SXV0	1	3375.84	21	84.2	93.3	117.5	101.1	140.1	116.7	75.6	72.9	90.3	99.4	65.4	46.3	125.7	194.9	261.8	235	159.8	343.5	180.5	185.7	240.1	161.5	184.2	102.8	4	844.721	7.04	0.00594	30.2836	7.779e-05	4.52e-07	3.08
258	High	[R].LYEEGLIYR.[E]	1xTMTpro [N-Term]	0.000133789	1	5	1	A0A6P6STY8	A0A6P6STY8 [306-314]	A0A6P6SYS6; A0A6P6SYF5; A0A6P6STY8; A0A6P6SUR5; A0A6P6SXQ8	0	1459.81	9	106.9	104.7	124.7	81.7	69.7	90.7	96.8	90.6	101	73	104.5	95.1	136.8	187.6	238.3	163	68.2	228.8	198.1	197.8	230.3	101.7	252.4	181	2	730.414	6.17	0.0045	39.5055	7.779e-05	0.0003121	2.64
259	High	[K].LYEALDKAEEILNK.[Q]	2xTMTpro [K7; K14]; 1xTMTpro [N-Term]	0.000133789	1	5	1	A0A6P6UBP8	A0A6P6UBP8 [249-262]	A0A6P6UAF0; A0A6P6UBP8; A0A6P6UCH5; A0A6P6UAA8; A0A6P6U9J3	1	2561.5	14	68.1	72.1	88	124.2	112.7	125.2	117.6	121.8	123	147.9	136.9	131	41.5	61.5	80.1	117.9	52.5	150.4	114.6	126.7	133.5	98.1	157.4	118.7	3	854.513	9.5	0.00811	52.6719	7.779e-05	6.393e-07	3.53
260	High	[K].LYDPAEFHVINPSK.[K]	1xTMTpro [K14]; 1xTMTpro [N-Term]	0.000133789	1	1	1	A0A6P6TT20	A0A6P6TT20 [573-586]	A0A6P6TT20	0	2238.24	14	199	112.6	135	92	182.8	84.5	68.6	63.3	69.4	103.8	57.3	59.1	80.7	63.9	81.7	58.1	56.6	67.5	44.5	43.8	50.1	45.8	43.8	35.6	3	746.757	6.08	0.00454	42.8565	7.779e-05	3.783e-07	3.21
261	High	[K].LYDNSAMENLLK.[S]	1xTMTpro [K12]; 1xTMTpro [N-Term]	0.000133789	2	4	1	A0A6P6U6W8; A0A6P6UI13	A0A6P6U6W8 [240-251]; A0A6P6UI13 [243-254]	A0A6P6U6W8; A0A6P6U6I8; A0A6P6UI13; A0A6P6UG70	0	2019.11	12	107.4	103.2	124.1	116.5	144.5	133.4	97.4	99.9	131.4	117.6	88	93.2	39.7	53.4	68.5	67.1	40.8	97.2	57.6	63	86.5	47.3	61.4	51.2	3	673.714	9.34	0.00629	46.6274	7.779e-05	4.536e-06	3.17
262	High	[R].LYDEALYEAAK.[I]	1xTMTpro [K11]; 1xTMTpro [N-Term]	0.000133789	1	1	2	A0A6P6W6X9	A0A6P6W6X9 [1219-1229]	A0A6P6W6X9	0	1894.05	11	105.2	108.8	128.7	112.3	134.2	62.8	98.7	77.4	74.3	120.8	119.3	166.2	102.5	148.4	187.2	170.4	99.9	120.7	153.8	128.7	129	128.1	219.4	240.7	2	947.533	7.34	0.00695	43.6061	7.779e-05	2.694e-08	4.3
263	High	[K].NADDVTKTDEVVIIAR.[G]	1xTMTpro [K7]; 1xTMTpro [N-Term]	0.000133789	1	1	1	A0A6P6UCM6	A0A6P6UCM6 [143-158]	A0A6P6UCM6	1	2367.34	16	89.6	105.6	107.8	118.4	136.9	122.7	89.6	90	91.3	122.1	119.8	89.1	72.3	119.3	129.9	148.9	84.4	195.2	115.6	124	131.2	107.2	182.5	106.9	3	789.784	0.51	0.0004	33.4943	7.779e-05	1.06e-07	2.71
264	High	[K].LTSAENTIEDLLR.[R]	1xTMTpro [N-Term]	0.000133789	1	1	1	A0A6P6S6Q8	A0A6P6S6Q8 [866-878]	A0A6P6S6Q8	0	1778.98	13	104.6	107.5	106.2	98	61.1	98.7	103.4	110.2	106.8	74.3	106.8	101.2	28.7	41.3	43.5	41.9	12.8	53.4	45.4	51.6	52.2	22.2	55.3	41.3	3	593.669	6.66	0.00395	51.1609	7.779e-05	8.658e-05	4.56
265	High	[K].ITQLVNTAPAIPR.[L]	1xTMTpro [N-Term]	0.000133789	1	1	4	A0A6P6USH6	A0A6P6USH6 [69-81]	A0A6P6USH6	0	1698.02	13	76.6	101.8	92.5	84.9	68.9	97.3	106	102.7	97.4	79.7	120.6	91.2	279	518.9	503	482	191.8	698.8	617.5	638.4	632.3	316.1	828.6	493.8	2	849.523	9.51	0.00808	43.9489	7.779e-05	6.946e-07	3.32
266	High	[K].IQGVEIDVQPR.[V]	1xTMTpro [N-Term]	0.000133789	1	1	3	A0A6P6TWC7	A0A6P6TWC7 [1463-1473]	A0A6P6TWC7	0	1557.89	11	104.3	169	165.3	112.2	43.7	121	134.8	122.6	154	46.6	90.6	92	68.7	155.7	162.5	115.1	22	157	142	137.8	180.6	33.4	112.6	90.1	2	779.455	7.32	0.0057	35.2151	7.779e-05	6.166e-07	3.34
267	High	[R].LQGNYYFQEQLSR.[H]	1xTMTpro [N-Term]	0.000133789	1	3	1	A0A6P6T8P7	A0A6P6T8P7 [29-41]	A0A6P6URX6; A0A6P6T8P7; A0A6P6UKR0	0	1950	13	78.8	100.7	91.6	85	90.1	89.4	90.5	93.9	77.7	83.4	91.4	91.8	144.4	258.1	250.4	242.5	126	322.6	265	293.6	253.6	166.3	315.7	249.9	2	975.515	9.35	0.00911	37.9204	7.779e-05	1.626e-06	3.35
268	High	[K].IQGLSGGTAR.[D]	1xTMTpro [N-Term]	0.000133789	1	1	1	A0A6P6VG47	A0A6P6VG47 [17-26]	A0A6P6VG47	0	1263.73	10	80.4	102.6	102.3	78.9	46.7	103	108.8	99.5	97.2	50.1	103.8	91.8	63.2	112.8	120	96.6	28	159.5	136.7	133.4	136	42.8	153.8	107.2	2	632.375	7.66	0.00484	20.0043	7.779e-05	0.0003812	1.94
269	High	[K].IQGIGAGFIPR.[N]	1xTMTpro [N-Term]	0.000133789	1	2	2	A0A6P6WQV5	A0A6P6WQV5 [300-310]	A0A6P6WQV5; A0A6P6WWX0	0	1432.86	11	103.3	105.5	111	96.4	85.5	98.2	94.8	98.5	93.7	89	98.4	90.3	152.8	218.4	245.1	222.1	96.6	286.2	224.1	248.5	246.8	143.3	274.7	198.5	3	478.293	4.12	0.00197	44.4227	7.779e-05	0.000119	3.34
270	High	[R].LQFHDCFVNGCDASVLLDDTPNMLGEK.[L]	2xCarbamidomethyl [C6; C11]; 1xOxidation [M23]; 1xTMTpro [K27]; 1xTMTpro [N-Term]	0.000133789	1	2	1	A0A6P6TKE9	A0A6P6TKE9 [93-119]	A0A6P6TKE9; A0A6P6TB05	0	3719.8	27	128.1	109.5	138.1	70.2	108	76.6	79.7	77.1	92.1	91.2	67.7	56.7	162.4	194.2	261.3	138.7	104.6	191.3	161.6	166.8	208	125.8	161.9	106.8	4	930.714	8.87	0.00825	46.7133	7.779e-05	3.939e-12	4.84
271	High	[K].LQETEDWLYEDGEDETKGVYIAK.[L]	2xTMTpro [K17; K23]; 1xTMTpro [N-Term]	0.000133789	1	2	1	A0A6P6X5G9	A0A6P6X5G9 [658-680]	A0A6P6X5G9; A0A6P6XDE9	1	3643.88	23	88.2	83.9	87.4	102.3	140.7	132.4	87.7	100.4	100.3	169	105.8	79.7	50.4	67.1	74.6	91.1	61.4	149.1	80.1	97.9	102.1	105.1	114.1	67.7	4	911.734	8.35	0.0076	46.0968	7.779e-05	9.181e-08	3.95
272	High	[K].LQETEDWLYEDGEDETK.[G]	1xTMTpro [K17]; 1xTMTpro [N-Term]	0.000133789	1	2	1	A0A6P6X5G9	A0A6P6X5G9 [658-674]	A0A6P6X5G9; A0A6P6XDE9	0	2708.31	17	66.7	60.1	75.1	139.5	98.8	145.8	78.8	91.8	113.8	168.4	124.9	194.3	43.6	54.9	73.2	142	49.3	187.7	82.3	102.3	132.4	119.7	154	188.7	3	903.449	9.35	0.00844	44.7627	7.779e-05	6.139e-08	4.28
273	High	[K].LQESATILPAVNQVEMNVGWQQR.[K]	1xOxidation [M16]; 1xTMTpro [N-Term]	0.000133789	2	4	2	A0A6P6X576; A0A6P6XCY7	A0A6P6X576 [231-253]; A0A6P6XCY7 [177-199]	A0A6P6X672; A0A6P6X576; A0A6P6XCY7; A0A6P6X682	0	2931.53	23	102.4	121.8	108.7	89	108.7	103.5	111.7	106.4	113.4	94.7	99.7	87	206.8	343.9	327.5	279.7	167.6	411.9	360.5	366.5	407.8	208.1	379.7	261.2	3	977.86	11.1	0.01085	47.9487	7.779e-05	1.638e-12	5.39
274	High	[K].IQEQQQQLWHCQQYLSQMSPSDLR.[M]	1xCarbamidomethyl [C11]; 1xOxidation [M18]; 1xTMTpro [N-Term]	0.000133789	1	2	7	A0A6P6SAF5	A0A6P6SAF5 [52-75]	A0A6P6SAF5; A0A6P6SCF4	0	3351.62	24	110.3	133.6	122.8	78.7	55.8	96.3	103.6	101.6	112.6	59	100.7	75.3	613.1	1039.5	1019.4	682	236.8	1055.7	921.4	964.1	1115.2	357.1	1056.2	622.7	3	1117.88	5.92	0.00662	36.0248	7.779e-05	1.703e-12	6.73
275	High	[K].IQEQQQQLWHCQQYLSQMSPSDLR.[M]	1xCarbamidomethyl [C11]; 1xTMTpro [N-Term]	0.000133789	1	2	10	A0A6P6SAF5	A0A6P6SAF5 [52-75]	A0A6P6SAF5; A0A6P6SCF4	0	3335.62	24	96.8	121.5	116.2	91.9	61.7	107.8	103.1	100.2	115.7	67.7	114.2	85.3	931.3	1636.1	1668.4	1376.5	453.3	2043.7	1585.8	1644.4	1981.6	708.7	2071.9	1219.4	3	1112.56	10.43	0.0116	42.6165	7.779e-05	2.452e-17	10.15
276	High	[K].IQEQQQQLWHCQQYLSQMSPSDLR.[M]	1xCarbamidomethyl [C11]	0.000133789	1	2	2	A0A6P6SAF5	A0A6P6SAF5 [52-75]	A0A6P6SAF5; A0A6P6SCF4	0	3031.41	24																									3	1011.15	6.86	0.00693	38.0188	7.779e-05	3.342e-08	5.05
277	High	[K].LQEQQQQKPTVEMNGR.[K]	1xOxidation [M13]; 1xTMTpro [N-Term]	0.000133789	1	2	4	A0A6P6V4V6	A0A6P6V4V6 [173-188]	A0A6P6V4V6; A0A6P6V412	0	2234.15	16	117.2	142.8	182	66.9	24	97	73.4	86.9	115.3	27.2	57.1	38	591.2	1007.9	1369.9	525.2	92.6	964.4	592.1	747.6	1035.5	149.5	542.8	284.9	3	745.398	11.88	0.00884	26.1726	7.779e-05	7.317e-05	2.88
278	High	[R].LQEQPPFDKK.[Q]	2xTMTpro [K9; K10]; 1xTMTpro [N-Term]	0.000133789	1	3	3	A0A6P6WKL0	A0A6P6WKL0 [76-85]	A0A6P6WKL0; A0A6P6WKN7; A0A6P6WGZ6	1	2142.27	10	97.1	98.2	90.3	103	122.2	112.4	95.8	93.3	106.8	106.3	98	88.2	348.4	493.3	484	575.6	334.9	795.1	549.7	571.6	682.7	415.1	663.6	470.8	2	1071.64	3.91	0.00419	30.2213	7.779e-05	0.0002296	3.28
279	High	[K].LQEPEPIDTTQSVSK.[Q]	1xTMTpro [K15]; 1xTMTpro [N-Term]	0.000133789	1	17	1	A0A6P6VGD7	A0A6P6VGD7 [670-684]	A0A6P6VGD7; A0A6P6VGD2; A0A6P6VJF1; A0A6P6VJE7; A0A6P6VGF0; A0A6P6VHA9; A0A6P6VGG0; A0A6P6VHN5; A0A6P6VHP0; A0A6P6VH96; A0A6P6VGE4; A0A6P6VHP6; A0A6P6VHN0; A0A6P6VJE2; A0A6P6VGE2; A0A6P6VGE7; A0A6P6VHA0	0	2280.26	15	80.8	86.3	78.5	80.4	91.2	76.5	90.7	87.2	76.5	90.6	71.5	77	151.3	226.1	219.2	234.5	130.4	282	271.5	278.6	255	184.6	252.4	214.3	3	760.762	6.55	0.00498	32.1734	7.779e-05	0.0002674	3.44
280	High	[R].LQENFQALDFELSEEDMELIK.[T]	1xOxidation [M17]; 1xTMTpro [K21]; 1xTMTpro [N-Term]	0.000133789	1	1	2	A0A6P6VCB1	A0A6P6VCB1 [268-288]	A0A6P6VCB1	0	3165.62	21	68.5	80.2	80.1	83.6	101.1	93.2	103.1	102.3	115.7	205.5	158	170.8	155.5	254.8	271.4	295.8	175.4	417.3	374.4	396.6	467.8	507.9	677	576.7	3	1055.88	4.35	0.00459	52.6799	7.779e-05	7.5e-11	5.05
281	High	[R].LQELGYTIISTGGTASALESDGLSVTK.[V]	1xTMTpro [K27]; 1xTMTpro [N-Term]	0.000133789	1	2	1	A0A6P6WB47	A0A6P6WB47 [40-66]	A0A6P6WB47; A0A6P6W8H1	0	3319.81	27	83.3	91.7	101.4	93.7	149.1	116.3	97.1	92.7	98.9	145.1	95.8	100.4	66.1	101.9	120.1	115.9	90.4	181.9	123.3	125.6	139.8	125.3	143.5	118.5	4	830.716	8.62	0.00715	52.599	7.779e-05	5.515e-08	4.46
282	High	[R].LQELFNEEGVEAK.[L]	1xTMTpro [K13]; 1xTMTpro [N-Term]	0.000133789	1	2	3	A0A6P6TA54	A0A6P6TA54 [205-217]	A0A6P6U4J4; A0A6P6TA54	0	2114.16	13	114	102.7	116.2	107	112.7	112	91.6	96	100.6	122	94.8	95.5	377.3	475.6	574.1	552	285	730.8	485	542.3	593	439.5	592.3	470	2	1057.59	7.57	0.00801	45.6901	7.779e-05	5.135e-09	3.81
283	High	[R].IQELEEQIITLEK.[K]	1xTMTpro [K13]; 1xTMTpro [N-Term]	0.000133789	1	1	1	A0A6P6S6Q8	A0A6P6S6Q8 [645-657]	A0A6P6S6Q8	0	2194.28	13	69	56	70.3	90.7	106.7	93.2	107.4	127.7	123.8	224.5	133.5	185.6	49.2	55.8	74.8	100.7	58.1	130.9	122.4	155.3	157.1	174.1	179.5	196.6	3	732.105	8.35	0.00611	52.4143	7.779e-05	1.89e-07	3.97
284	High	[K].LQEGSSGAIVVK.[N]	1xTMTpro [K12]; 1xTMTpro [N-Term]	0.000133789	1	2	3	A0A6P6WWU9	A0A6P6WWU9 [38-49]	A0A6P6WWU9; A0A6P6X2G4	0	1796.08	12	106.1	102.5	95.2	99.9	126.6	116.1	94.2	93.3	99.7	95.4	87.2	79.5	365.3	493.6	489.2	535.9	332.9	787.6	518.7	548	611.4	357.2	566.3	406.9	2	898.549	7	0.00629	32.718	7.779e-05	6.165e-08	3.36
285	High	[R].LQEGLECGGAYLK.[Y]	1xCarbamidomethyl [C7]; 1xTMTpro [K13]; 1xTMTpro [N-Term]	0.000133789	2	2	1	A0A6P6XCX5; A0A6P6X9W9	A0A6P6XCX5 [105-117]; A0A6P6X9W9 [105-117]	A0A6P6XCX5; A0A6P6X9W9	0	2046.12	13	100.4	109.2	117.9	118.6	114.9	120.4	80.9	94.5	87.6	98.6	98.3	103.7	157.2	239.2	275.6	289.2	137.4	371.6	202.5	252.5	244.3	168.1	290.5	241.5	2	1023.57	6.23	0.00637	41.4472	7.779e-05	6.867e-11	4.65
286	High	[K].LQEELDIDVLVHGEPER.[N]	1xTMTpro [N-Term]	0.000133789	1	1	1	A0A6P6SM43	A0A6P6SM43 [477-493]	A0A6P6SM43	0	2295.22	17	98.8	96.3	99.8	94.9	110	127	107	96.3	106	99.3	96.6	101.5	60.8	82.9	91.7	91	51.7	154	105.3	101.1	116.2	66.5	112.2	92.9	3	765.75	8.84	0.00676	45.6242	7.779e-05	2.984e-11	4.87
287	High	[R].IQEAIGLGQR.[I]	1xTMTpro [N-Term]	0.000133789	1	1	2	A0A6P6W7A1	A0A6P6W7A1 [424-433]	A0A6P6W7A1	0	1388.82	10	112.8	175.4	169	74.2	28.3	121	123.1	124.2	125.5	56	126.5	77.3	43.9	95.5	98.2	45	8.4	92.8	76.6	82.5	87	23.7	92.9	44.7	2	694.918	7.36	0.00511	33.5321	7.779e-05	1.478e-05	2.55
288	High	[R].IQDINDLRPLAELR.[L]	1xTMTpro [N-Term]	0.000133789	1	1	1	A0A6P6TAD3	A0A6P6TAD3 [107-120]	A0A6P6TAD3	0	1970.14	14	118	136.2	143.7	75.9	48.1	95.7	109.5	111	120.2	74.5	132.3	100.1	48.8	78.8	88.7	48.9	15.2	78	72.4	78.3	88.5	33.5	103.2	61.5	3	657.388	6.76	0.00444	44.3253	7.779e-05	1.244e-05	3.57
289	High	[K].IQDKEGIPPDQQR.[L]	1xTMTpro [K4]; 1xTMTpro [N-Term]	0.000133789	2	19	26	A0A6P6T2W9; A0A6P6SBR0	A0A6P6T2W9 [30-42]; [106-118]; [182-194]; [258-270]; [334-346]; A0A6P6SBR0 [88-100]	A0A6P6T3T4; A0A6P6T2W9; A0A6P6T3D4; A0A6P6SPY4; A0A6P6WPJ7; A0A6P6WGR1; A0A6P6WKU1; A0A6P6WG59; A0A6P6SBR0; A0A6P6WL15; A0A6P6UF64; A0A6P6SU89; R4ZCY0; A0A6P6TT42; A0A6P6VYJ2; A0A6P6SIN4; A0A6P6XIT7; A0A6P6VWF9; A0A6P6TRN7	1	2132.2	13	96.6	94.2	89.3	99.1	94.2	107	115.9	122.5	122.2	98.2	101.2	86	2441.1	3329.2	3368.2	3898.5	1818.3	5327.6	4681.9	5282	5500.7	2700.5	4824.4	3229.8	2	1066.61	5.41	0.00577	20.5516	7.779e-05	3.973e-08	3.1
290	High	[K].IQATSFSYCLVDMDSGK.[S]	1xCarbamidomethyl [C9]; 1xOxidation [M13]; 1xTMTpro [K17]; 1xTMTpro [N-Term]	0.000133789	1	1	1	A0A6P6X7W6	A0A6P6X7W6 [269-285]	A0A6P6X7W6	0	2546.28	17	106	95.2	106.1	80.5	101.9	80.3	101	95.8	104.8	128.7	108.7	108.1	66.6	83.7	99.5	78.8	48.9	99.5	101.5	102.8	117.3	88	128.9	101	3	849.439	9.89	0.0084	44.2451	7.779e-05	5.598e-05	3.14
291	High	[R].IQASGADIIK.[I]	1xTMTpro [K10]; 1xTMTpro [N-Term]	0.000133789	1	2	1	A0A6P6X2E2	A0A6P6X2E2 [159-168]	A0A6P6X2E2; A0A6P6X0K6	0	1623.99	10	66.5	74.2	59.5	81.9	104.3	91.1	96.7	95.9	90.3	101.7	94.7	91.5	97.4	152.1	130.2	187	116.7	263	226.5	239.8	235.7	162.1	261.7	199.4	2	812.506	7.94	0.00645	34.7444	7.779e-05	1.393e-06	2.89
292	High	[R].IQAIPDGAAAAPK.[Q]	1xTMTpro [K13]; 1xTMTpro [N-Term]	0.000133789	1	2	1	A0A6P6T2V8	A0A6P6T2V8 [117-129]	A0A6P6T2V8; A0A6P6SYF6	0	1831.09	13	116.1	98.1	111.9	109.7	158.6	108	86.9	96.3	96.7	127.6	99.9	100.6	100.4	118.7	144.5	147.8	104.8	184.1	120.2	142.2	149	120.1	163	129.3	3	611.039	5.8	0.00354	33.1841	7.779e-05	8.525e-05	3.62
293	High	[K].LQAGYLFPEIAR.[R]	1xTMTpro [N-Term]	0.000133789	1	1	1	A0A6P6UV63	A0A6P6UV63 [72-83]	A0A6P6UV63	0	1681.96	12	57.6	79.4	98.1	75.9	51.5	83.2	92.6	94.3	97	74.3	125	113.7	68.2	131.6	173.5	140	46.6	194.3	175.4	190.6	204.6	95.8	279.4	200.2	2	841.486	3.11	0.00262	48.0508	7.779e-05	2.267e-05	3.4
294	High	[K].IPVVSANVIVQDSTGK.[E]	1xTMTpro [K16]; 1xTMTpro [N-Term]	0.000133789	1	2	1	A0A6P6X5T5	A0A6P6X5T5 [498-513]	A0A6P6X5T5; A0A6P6X541	0	2235.32	16	102.8	97.1	112.6	98.1	130.7	96	96.9	98.6	93.1	148.4	108.8	158.1	67.7	89.4	110.6	100.6	65.7	124.5	102	110.7	109.1	106.3	135.1	154.7	3	745.786	9.83	0.00733	46.7482	7.779e-05	6.97e-09	4.8
295	High	[K].LQHGEYVSLGK.[V]	1xTMTpro [K11]; 1xTMTpro [N-Term]	0.000133789	1	2	1	A0A6P6UPT6	A0A6P6UPT6 [563-573]	A0A6P6UPT6; A0A6P6UU64	0	1839.06	11	132.4	97.6	100	96.1	156	80.3	88.2	84.6	87.8	110.2	72.8	91.6	134.3	138.5	151.5	151.8	120.9	160.6	143.1	146.4	158.6	121.6	139.4	138.1	3	613.697	7.89	0.00484	27.1502	7.779e-05	0.0001691	3.07
296	High	[R].IPVSSFPEVPGGK.[V]	1xTMTpro [K13]; 1xTMTpro [N-Term]	0.000133789	1	2	2	A0A6P6VBY7	A0A6P6VBY7 [41-53]	A0A6P6VBY7; A0A6P6V3I8	0	1922.12	13	96.3	90.1	94.7	89.9	130.1	115.1	90.5	82.9	97.1	117.9	103.8	106.3	65.3	85.5	95.9	95	67.4	153.9	98.1	96	117.3	87	132.8	107.2	3	641.383	5.76	0.00369	44.6728	7.779e-05	0.0002516	3.33
297	High	[K].LQKPALSTQPK.[G]	2xTMTpro [K3; K11]; 1xTMTpro [N-Term]	0.000133789	1	3	2	A0A6P6UEC6	A0A6P6UEC6 [550-560]	A0A6P6UEC6; A0A6P6U8U9; A0A6P6UA67	0	2123.34	11	83.1	92.3	81.2	110.1	116.8	123	101.8	102.3	104.1	92.2	93.7	90.9	248.2	385.8	362.4	512.5	266.6	724.4	486.5	521.8	554.1	299.7	528.4	403.6	3	708.454	4.37	0.00309	28.4675	7.779e-05	0.0001255	3.49
298	High	[R].LQIGQELTR.[G]	1xTMTpro [N-Term]	0.000133789	1	2	1	A0A6P6SHL6	A0A6P6SHL6 [167-175]	A0A6P6SHL6; A0A6P6T478	0	1361.81	9	127.1	117.4	124.1	103.8	98	120	112.7	122.1	128.9	85.6	96.3	84.6	157.8	204	230	200.8	92.9	293.7	223.8	258.7	285.1	115.6	225.7	156.1	2	681.413	8.6	0.00586	33.4508	7.779e-05	4.129e-05	2.44
299	High	[K].LRDPVAEQALHEHEIPGPALDDR.[V]	1xTMTpro [N-Term]	0.000133789	1	2	1	A0A6P6VUD2	A0A6P6VUD2 [243-265]	A0A6P6WCI3; A0A6P6VUD2	1	2882.51	23	98.5	99	92.8	93.2	107.5	116.5	103.7	109.3	91.7	109	113.8	90.1	36.1	50.8	50.8	53.2	30.1	84.2	60.8	68.4	59.9	43.5	78.7	49.1	5	577.314	11.14	0.00642	32.3707	7.779e-05	3.756e-08	5.87
300	High	[R].LRDEPTLAVLSQNVQEYLER.[A]	1xTMTpro [N-Term]	0.000133789	1	1	1	A0A6P6UCP1	A0A6P6UCP1 [397-416]	A0A6P6UCP1	1	2677.45	20	90.8	99.5	102.1	107.2	86.7	117.1	118	123.1	106.5	69.3	132.3	117.4	51.4	78.8	86.3	94.5	37.5	130.6	106.8	118.9	107.4	42.7	141.3	98.8	3	893.158	4.36	0.00389	50.2094	7.779e-05	7.364e-14	6.38
301	High	[R].IQVVDHKGNKVFDDEVK.[Q]	3xTMTpro [K7; K10; K17]; 1xTMTpro [N-Term]	0.000133789	1	1	2	A0A6P6WMC4	A0A6P6WMC4 [382-398]	A0A6P6WMC4	2	3186.86	17	117.9	113.5	117.6	76	96.1	123.9	92.8	90.4	113.5	90.4	78.8	55	244.8	329.7	364.5	245.8	152.4	506.9	308.1	320.3	419.6	204.2	308.6	169.6	5	638.184	8.39	0.00535	33.8178	7.779e-05	2.525e-06	3.96
302	High	[R].IQVVDHKGNK.[V]	2xTMTpro [K7; K10]; 1xTMTpro [N-Term]	0.000133789	1	1	6	A0A6P6WMC4	A0A6P6WMC4 [382-391]	A0A6P6WMC4	1	2050.26	10	116.1	99	93.4	80.2	89.2	94.1	97.1	102.1	99.2	88.6	89.2	71.8	604.9	721.5	726	650.9	355.1	965.8	808.8	907.8	920.4	502.3	876.4	556.1	3	684.096	6.56	0.00449	19.4935	7.779e-05	0.0001216	2.42
303	High	[R].IQVVDHKGNK.[V]	TMTpro [K]; 1xTMTpro [N-Term]	0.000133789	1	1	3	A0A6P6WMC4	A0A6P6WMC4 [382-391]	A0A6P6WMC4	1	1746.05	10	126.3	98.9	102.4	91.4	99.3	91.5	106.7	99.9	109.5	114.8	151	89.3	233.1	255.3	282.2	262.8	140	332.7	314.9	314.5	359.8	230.5	525.9	245	3	582.692	6.09	0.00355	13.7514	7.779e-05	3.984e-06	4.42
304	High	[R].IQVVDHK.[G]	1xTMTpro [K7]; 1xTMTpro [N-Term]	0.000133789	1	1	127	A0A6P6WMC4	A0A6P6WMC4 [382-388]	A0A6P6WMC4	0	1446.89	7	121.7	114.3	97.7	88.2	81.5	68	118.9	113.1	99.9	89	108.5	120.4	9310.2	12233.1	11156	10506.5	4764.1	10247.2	14542.6	14768.2	13612.3	7408.6	15665.4	13693.6	3	482.971	4.63	0.00223	59.1606	7.779e-05	3.471e-05	3.34
305	High	[K].IQVIVVTDGER.[I]	1xTMTpro [N-Term]	0.000133789	1	1	1	A0A6P6XE01	A0A6P6XE01 [236-246]	A0A6P6XE01	0	1532.9	11																									2	766.958	8.32	0.00637	38.878	7.779e-05	6.82e-05	2.42
306	High	[K].IQVGVFSATMPPEALEITR.[K]	1xOxidation [M10]; 1xTMTpro [N-Term]	0.000133789	1	2	1	A0A6P6TNY8	A0A6P6TNY8 [215-233]	A0A6P6TNY8; A0A6P6U1F9	0	2379.29	19	116.9	110.7	110.5	100.8	101.5	110.8	123	136.8	119.2	103.6	109.9	113.2	42.5	56.3	60	57.1	28.2	79.4	71.5	84.9	77.2	41	75.4	61.2	3	793.776	9.93	0.00787	47.9583	7.779e-05	2.605e-10	4.98
307	High	[K].IQVGVFSATMPPEALEITR.[K]	1xTMTpro [N-Term]	0.000133789	1	2	1	A0A6P6TNY8	A0A6P6TNY8 [215-233]	A0A6P6TNY8; A0A6P6U1F9	0	2363.3	19	100.8	110.2	110.9	93.8	90.1	112.1	115.8	106.6	107.4	113.6	122.3	107	56.1	85.8	92.1	81.3	38.3	122.9	103	101.2	106.4	68.8	128.4	88.5	3	788.447	12.36	0.00974	50.6903	7.779e-05	3.173e-10	5.12
308	High	[R].IQVEHPVTEMISSVDLIEEQIR.[V]	1xTMTpro [N-Term]	0.000133789	2	3	1	A0A6P6VBE4; A0A6P6V544	A0A6P6VBE4 [364-385]; A0A6P6V544 [364-385]	A0A6P6VBE4; A0A6P6V544; A0A6P6V2T8	0	2869.53	22	85.7	102	111.8	120.9	69.9	120.9	101.5	109.3	108.6	99.6	112.8	91.3	32.9	54.8	64.1	72.3	20.5	91.5	62.3	71.6	74.3	41.6	81.7	52.1	3	957.19	8.73	0.00835	51.4125	7.779e-05	1.035e-10	5.75
309	High	[R].LQTSFGTDRIPDAHLLVQAEQSAK.[R]	1xTMTpro [K24]; 1xTMTpro [N-Term]	0.000133789	2	2	1	A0A6P6XGC1; A0A6P6X732	A0A6P6XGC1 [679-702]; A0A6P6X732 [679-702]	A0A6P6XGC1; A0A6P6X732	1	3233.78	24	77.2	88.9	84.2	89.7	119.7	91.3	89.7	92.4	100.2	111.7	97.8	85.2	110.4	177.9	179.7	199.8	130.7	257.2	205	225.4	255.1	173.8	263.8	181.2	4	809.206	7.73	0.00625	43.8552	7.779e-05	0.0003006	2.67
310	High	[K].IQTPTDEVVVPYDTLAPVSEDPAETKK.[L]	2xTMTpro [K26; K27]; 1xTMTpro [N-Term]	0.000133789	1	2	3	A0A6P6T9X0	A0A6P6T9X0 [56-82]	A0A6P6T9X0; A0A6P6TJB6	1	3855.11	27	86.1	74.9	89.7	104.2	138.5	117.5	89.3	90.7	110.2	118	87.5	79.9	645.4	785.5	1003.3	1216.5	792.7	1734.3	1070	1159.1	1470.7	961.6	1236.7	890.1	3	1285.71	4.36	0.0056	45.1495	7.779e-05	1.534e-15	6.11
311	High	[K].IQTPTDEVVVPYDTLAPVSEDPAETK.[K]	1xTMTpro [K26]; 1xTMTpro [N-Term]	0.000133789	1	2	1	A0A6P6T9X0	A0A6P6T9X0 [56-81]	A0A6P6T9X0; A0A6P6TJB6	0	3422.81	26	80.6	62.8	97.2	113	154.3	117.8	93.9	94.3	107.2	133.4	100.2	108.2	18	19.6	32.4	39.3	26.3	51.8	33.5	35.9	42.6	32.4	42.2	35.9	4	856.465	9.3	0.00796	47.369	7.779e-05	2.279e-06	5.29
312	High	[K].IQTDVLSQAR.[Q]	1xTMTpro [N-Term]	0.000133789	1	2	1	A0A6P6SW67	A0A6P6SW67 [14-23]	A0A6P6SW67; A0A6P6SWI3	0	1434.82	10	90.5	109	97.1	81.3	68.8	92.6	97.3	98.7	93.4	61.5	98.4	82.2	154.2	260	247.1	215.8	89.5	311	265.3	286.9	283.6	114	316.5	208.2	2	717.921	7.73	0.00554	29.7238	7.779e-05	0.0001221	2.51
313	High	[K].LQTANFDQK.[I]	1xTMTpro [K9]; 1xTMTpro [N-Term]	0.000133789	1	2	2	A0A6P6WUB2	A0A6P6WUB2 [460-468]	A0A6P6WUB2; A0A6P6WT68	0	1672.95	9	101.7	79.7	82.2	99.6	132.4	111.1	115	115.2	116.7	132.5	105.1	100.9	125.2	137.4	151.1	191	124.5	269.6	226.4	242.1	255.9	177.5	244.1	184.8	2	836.984	6.1	0.0051	28.82	7.779e-05	3.935e-06	3.56
314	High	[K].LQSSLGEVNEIIK.[G]	1xTMTpro [K13]; 1xTMTpro [N-Term]	0.000133789	1	1	2	A0A6P6V9T2	A0A6P6V9T2 [468-480]	A0A6P6V9T2	0	2038.2	13	60.7	77.1	79.5	121.4	121	131.2	107.7	121.7	115.5	165.7	166	158.5	125.5	223	245.2	390.6	191	534.2	355.9	428.9	424.9	372.4	646.9	486.7	2	1019.61	5.66	0.00576	45.5329	7.779e-05	3.655e-08	4.25
315	High	[K].LQSQPPPLPGQPLR.[Y]	1xTMTpro [N-Term]	0.000133789	1	2	2	A0A6P6UDS9	A0A6P6UDS9 [32-45]	A0A6P6U9S0; A0A6P6UDS9	0	1832.07	14	95.4	131.9	118.5	101	68.4	108.8	132.4	129.5	119.2	74.3	129.6	116.5	115.4	223.1	213.8	190.3	63.2	259.2	256	267.2	256.7	97.8	295.7	209.4	3	611.365	5.16	0.00315	34.8525	7.779e-05	1.338e-05	3.62
316	High	[K].LQQIVFPFK.[L]	1xTMTpro [K9]; 1xTMTpro [N-Term]	0.000133789	1	1	3	A0A6P6V2H2	A0A6P6V2H2 [196-204]	A0A6P6V2H2	0	1728.07	9	81.3	99.8	111.8	92.6	114.7	69.9	109.1	88.6	79.1	108	133	154.6	123.8	212.8	254.1	219.8	133.5	209.7	265.7	230.2	214.6	179	382.1	350	3	576.698	4.39	0.00253	51.5821	7.779e-05	0.0003891	3.13
317	High	[R].LQPSEAIYMK.[L]	1xTMTpro [K10]; 1xTMTpro [N-Term]	0.000133789	1	1	1	A0A6P6VG60	A0A6P6VG60 [235-244]	A0A6P6VG60	0	1788.02	10	85.6	80.5	92.6	93.7	127.3	102.3	84.1	82.2	92.1	115.7	82.1	82.8	154.2	202.8	249	262.8	175.1	362.9	242.2	252.5	295.3	226.7	278.8	221.6	2	894.52	5.89	0.00526	39.836	7.779e-05	8.861e-05	2.48
318	High	[R].LQPENVEHNK.[S]	1xTMTpro [K10]; 1xTMTpro [N-Term]	0.000133789	1	2	3	A0A6P6WNM9	A0A6P6WNM9 [242-251]	A0A6P6WNM9; A0A6P6X0I6	0	1816.02	10	87.2	70.5	73.5	99.8	110.2	85.4	109.4	124.5	125.8	170	128.5	155.2	233	263.3	292.9	415.3	224.9	449.6	467	567.5	598.4	494	647.7	616.3	3	606.016	7.62	0.00461	16.6629	7.779e-05	8.876e-08	4.53
319	High	[R].IQNTNVDGK.[Q]	1xTMTpro [K9]; 1xTMTpro [N-Term]	0.000133789	1	1	3	A0A6P6X2Z1	A0A6P6X2Z1 [15-23]	A0A6P6X2Z1	0	1596.92	9	102.6	95.6	96.7	111.4	104.5	92.4	109.4	116.5	96.6	86	94.6	102.2	236.7	308.7	333.1	400.4	184.1	420	403.5	458.6	397	216	412	350.5	2	798.969	7.11	0.00568	19.1699	7.779e-05	6.138e-06	2.63
320	High	[K].IQNLTPNIGVVYSGMGPDFR.[V]	1xTMTpro [N-Term]	0.000133789	1	1	1	A0A6P6TIZ5	A0A6P6TIZ5 [65-84]	A0A6P6TIZ5	0	2482.31	20	80.5	91	84	86.3	84.4	103.7	99.1	89.4	96.3	82.5	87.8	75.3	73.4	116.1	114.3	122.5	58.8	186.4	144.5	139.1	156.4	81.9	151	102	3	828.115	9.19	0.0076	49.1073	7.779e-05	5.781e-10	4.5
321	High	[R].IQNGGTEVVEAK.[A]	1xTMTpro [K12]; 1xTMTpro [N-Term]	0.000133789	1	1	1	A0A6P6T9M3	A0A6P6T9M3 [251-262]	A0A6P6T9M3	0	1853.06	12	88.6	100.2	87.7	100	109.7	99	116.1	104	123.5	113.1	116.7	100.2	91.7	145	135.4	161.1	86.7	201.9	192	183.5	227.5	127.3	227.8	154.1	3	618.362	4.59	0.00283	24.945	7.779e-05	5.539e-06	4.11
322	High	[K].LQNASSVEEALEIAR.[A]	1xTMTpro [N-Term]	0.000133789	2	3	1	A0A6P6TWB0; A0A6P6TWU8	A0A6P6TWB0 [479-493]; A0A6P6TWU8 [481-495]	A0A6P6TWB0; A0A6P6TUM7; A0A6P6TWU8	0	1934.05	15	109	129.6	132.6	102.4	63.8	124.8	116.1	117.6	124.7	72.1	133.7	98.9	182.8	304.3	332.1	267.6	81.7	412.7	311.3	336.7	372.5	131.6	423.2	246.5	2	967.538	9.43	0.00912	44.8003	7.779e-05	7.321e-11	4.58
323	High	[K].IQNAGTEVVEAK.[A]	1xTMTpro [K12]; 1xTMTpro [N-Term]	0.000133789	1	1	2	A0A6P6XGE5	A0A6P6XGE5 [299-310]	A0A6P6XGE5	0	1867.08	12	93.5	98.6	89.5	94.9	110.8	108.8	95.3	103.9	109.2	115.8	105.2	99.2	175.2	258.5	250.4	276.9	158.6	401.8	285.6	332.3	364.3	236.1	372	276.3	2	934.048	5.82	0.00543	29.8433	7.779e-05	1.292e-08	3.54
324	High	[K].IQMANTCNNLVHSGGR.[Y]	1xCarbamidomethyl [C7]; 1xOxidation [M3]; 1xTMTpro [N-Term]	0.000133789	1	1	1	A0A6P6VU23	A0A6P6VU23 [62-77]	A0A6P6VU23	0	2092.03	16	95.4	101.5	105.8	87.9	70	93.6	115.3	111.9	116.8	76.5	179.6	160.2	46.4	69.1	76.8	66.6	26	89.7	89.7	92.9	101.2	40.5	164.8	115.8	3	698.02	5.51	0.00384	14.9545	7.779e-05	2.842e-10	6.11
325	High	[KR].LQLWDTAGQER.[F]	1xTMTpro [N-Term]	0.000133789	6	16	4	A0A6P6T3A0; A0A6P6VXK5; A0A6P6U5N4; A0A6P6WFC6; A0A6P6VXP5; A0A6P6VXE8	A0A6P6T3A0 [66-76]; A0A6P6VXK5 [59-69]; A0A6P6U5N4 [59-69]; A0A6P6WFC6 [59-69]; A0A6P6VXP5 [60-70]; A0A6P6VXE8 [59-69]	A0A6P6VRH0; A0A6P6SVL0; A0A6P6T3A0; A0A6P6VXK5; A0A6P6U5N4; A0A6P6W208; A0A6P6TPI3; A0A6P6WFC6; A0A6P6W6P1; A0A6P6TES7; A0A6P6VXP5; A0A6P6TU70; A0A6P6WI73; A0A6P6TTR0; A0A6P6UB46; A0A6P6VXE8	0	1620.87	11	106.8	104	97.5	111.4	72.9	119	118.1	114.1	102.8	87.4	111.4	103.8	197.3	268.9	268.9	320.5	102.8	433.3	348.7	359.5	338.3	175.6	388.1	285	2	810.945	10.55	0.00855	38.8035	7.779e-05	4.275e-05	3.17
326	High	[R].IQLVPQHLPAGDQSK.[E]	1xTMTpro [K15]; 1xTMTpro [N-Term]	0.000133789	1	2	1	A0A6P6UI02	A0A6P6UI02 [311-325]	A0A6P6UI02; A0A6P6UV78	0	2239.31	15	82.9	99.8	92.3	99	106.2	99.8	112.4	108.8	106.2	106.7	111.6	101.2	75.3	126.9	125.2	140.1	73.7	178.6	163.2	168.6	171.8	105.5	191.2	136.6	3	747.115	10.67	0.00797	36.4592	7.779e-05	0.0001298	3.58
327	High	[K].LQLVEAEK.[K]	1xTMTpro [K8]; 1xTMTpro [N-Term]	0.000133789	1	1	1	A0A6P6TUL0	A0A6P6TUL0 [41-48]	A0A6P6TUL0	0	1537.94	8	107	105.2	81.3	150.9	118.2	135.3	123.8	128	113.3	104.1	102.3	109.3	60.2	82.8	68.3	132.2	50.8	150	111.4	122.9	113.5	63.7	108.6	91.4	2	769.482	8.17	0.00628	38.5554	7.779e-05	0.000231	2.85
328	High	[K].LQLFLPEYSEQEQQPQQQQEQQQQGVGR.[G]	1xTMTpro [N-Term]	0.000133789	1	1	22	A0A6P6WMC4	A0A6P6WMC4 [269-296]	A0A6P6WMC4	0	3675.83	28	99.9	104.1	103.8	89.7	91.2	104.6	94.2	92.9	101.1	90.3	95.3	86.9	1080.9	1576.1	1676.1	1511.5	753.8	2230.3	1628.5	1714.6	1948.2	1062.9	1944	1397.9	3	1225.96	6.81	0.00835	47.3738	7.779e-05	1.464e-12	4.93
329	High	[K].LREDQENLLLPLIR.[A]	1xTMTpro [N-Term]	0.000133789	1	1	1	A0A6P6VMW3	A0A6P6VMW3 [250-263]	A0A6P6VMW3	1	2026.2	14	94.2	108.3	96	75.6	96.3	78.5	89.2	90.8	83.4	91.6	87.8	93.1	95.9	154.2	145.9	119.8	74.9	157.5	145.2	157.6	151.2	101.4	168.6	140.9	3	676.077	9.15	0.00618	47.0865	7.779e-05	0.0004272	3.6
330	High	[R].LPVEQAITATVQEYK.[S]	1xTMTpro [K15]; 1xTMTpro [N-Term]	0.000133789	1	2	1	A0A6P6T8F5	A0A6P6T8F5 [686-700]	A0A6P6T8F5; A0A6P6T7A4	0	2298.32	15	66.3	59.3	69.1	113.1	166.3	114.6	85.5	103.6	87.7	179.3	105.6	139.8	36.7	45.9	57.1	97.5	70.3	125	75.7	97.8	86.4	108	110.3	115	3	766.785	8.27	0.00634	50.7156	7.779e-05	2.735e-08	4.69
331	High	[R].LPVAGSEEDANKLISIAR.[D]	1xTMTpro [K12]; 1xTMTpro [N-Term]	0.000133789	1	3	1	A0A6P6UJ40	A0A6P6UJ40 [454-471]	A0A6P6W9G5; A0A6P6UJ40; A0A6P6UJ50	1	2491.44	18	79.8	76.1	76.1	123.5	132.2	116.1	124.1	113.1	112.4	170.3	151.4	94.9	70.4	93.9	100.2	169.7	89.1	201.9	175.1	170.3	176.7	163.5	252	124.5	3	831.159	10.21	0.00848	44.5057	7.779e-05	8.411e-14	4.31
332	High	[R].LPGEVQPQLEVTPITK.[Y]	1xTMTpro [K16]; 1xTMTpro [N-Term]	0.000133789	2	3	2	A0A6P6SFQ9; A0A6P6S7R6	A0A6P6SFQ9 [271-286]; A0A6P6S7R6 [271-286]	A0A6P6SFQ9; A0A6P6S7R6; A0A6P6SHH8	0	2357.39	16	98.8	68.1	71.4	99.6	213.2	98.1	89.3	86.6	88.8	162.8	90.9	106.6	136.7	131.9	147.4	214.7	225.4	267.5	197.7	204.5	218.8	245.2	237.2	219.4	3	786.476	9.07	0.00713	45.322	7.779e-05	0.0003057	3.47
333	High	[K].IPGASSLGFALPAK.[T]	1xTMTpro [K14]; 1xTMTpro [N-Term]	0.000133789	1	2	1	A0A6P6TNU9	A0A6P6TNU9 [62-75]	A0A6P6TNU9; A0A6P6TXC1	0	1937.17	14	69	79.6	81	84.9	97.5	90.3	91.1	91.6	88.6	86.6	77.7	82.6	74	119.4	129.7	141.7	79.8	190.7	156.2	167.5	169.2	101	157.2	131.7	3	646.401	9.1	0.00588	48.3555	7.779e-05	4.955e-06	3.26
334	High	[R].IPFTAGLGLDK.[I]	1xTMTpro [K11]; 1xTMTpro [N-Term]	0.000133789	2	2	2	A0A6P6X039; A0A6P6WK79	A0A6P6X039 [313-323]; A0A6P6WK79 [313-323]	A0A6P6X039; A0A6P6WK79	0	1740.06	11	80.3	77	91	119.6	128.3	112.3	105.9	115.5	111.6	160.3	134.4	141.2	111.9	150.1	189.2	259.4	136.5	308.2	235.8	274.6	276.9	243	353.2	292.4	2	870.538	8.26	0.00719	48.7863	7.779e-05	3.485e-06	3.59
335	High	[K].LPFPVNSDEEIIQEFGK.[A]	1xTMTpro [K17]; 1xTMTpro [N-Term]	0.000133789	1	1	1	A0A6P6VZM9	A0A6P6VZM9 [153-169]	A0A6P6VZM9	0	2570.4	17	75.3	78.1	68.2	65.6	83.4	85.9	93.9	92.6	103	228.9	188.4	219.7	35.2	51.1	47.6	47.8	29.8	79.2	70.2	73.9	85.8	116.5	166.2	152.7	3	857.477	6.05	0.00518	52.4346	7.779e-05	9.346e-08	3.33
336	High	[K].LPFGEIEVLR.[T]	1xTMTpro [N-Term]	0.000133789	1	1	1	A0A6P6WUP1	A0A6P6WUP1 [1023-1032]	A0A6P6WUP1	0	1476.87	10	84.1	75.1	97.9	135.3	86.8	144.9	111.6	119.7	111.2	112.2	144.1	146.5	57	71.2	99	142.8	44.9	193.5	120.9	138.3	134.1	82.7	184.2	147.5	2	738.948	9.52	0.00703	49.391	7.779e-05	1.048e-05	2.71
337	High	[K].LPFFDDPIALGAFQANKK.[G]	2xTMTpro [K17; K18]; 1xTMTpro [N-Term]	0.000133789	1	1	3	A0A6P6TWC7	A0A6P6TWC7 [1060-1077]	A0A6P6TWC7	1	2904.68	18	76.6	84.9	78.1	116	149.8	99.8	115.7	112.9	116.9	131.1	90.8	95.7	211.9	328.8	322.5	500	316.7	544.3	511.8	533	576.4	394.7	473.9	393.5	3	968.908	10.29	0.00996	52.9668	7.779e-05	1.944e-09	4.39
338	High	[R].IPEVSVPEKPVLQFASDAR.[V]	1xTMTpro [K9]; 1xTMTpro [N-Term]	0.000133789	1	1	2	A0A6P6U3E1	A0A6P6U3E1 [131-149]	A0A6P6U3E1	0	2690.54	19	110.5	113.2	124.8	114.2	119.1	103.1	79.9	87.9	75	110.2	102.2	137.9	148.5	212.9	250.4	239.1	122.2	273	171.7	201.6	179.6	161.1	259	275.5	4	673.393	4.71	0.00317	46.3783	7.779e-05	1.347e-08	3.26
339	High	[R].IPETAAAGVYR.[I]	1xTMTpro [N-Term]	0.000133789	1	2	1	A0A6P6W5U2	A0A6P6W5U2 [745-755]	A0A6P6UFP3; A0A6P6W5U2	0	1451.82	11	127.2	111.5	139.1	90.6	49.6	96.8	120.7	115.7	112.2	64.1	98.9	91	52	63.8	84.9	57.7	15.5	78	78.9	80.7	81.7	28.5	76.3	55.3	2	726.42	10.46	0.00759	28.3688	7.779e-05	0.0002979	2.17
340	High	[R].IPESSATWAK.[K]	1xTMTpro [K10]; 1xTMTpro [N-Term]	0.000133789	2	2	2	A0A6P6TTD0; A0A6P6U4R9	A0A6P6TTD0 [144-153]; A0A6P6U4R9 [140-149]	A0A6P6TTD0; A0A6P6U4R9	0	1697.97	10	105.8	110.3	101.2	105.8	113.4	117.1	103.3	101.6	107.6	101.1	97	104	93	135.7	132.7	144.8	76.1	202.8	145.2	152.4	168.4	96.7	160.8	135.9	2	849.495	6.15	0.00522	34.1399	7.779e-05	6.321e-05	2.92
341	High	[K].LPEPGTNDAVGATFR.[L]	1xTMTpro [N-Term]	0.000133789	1	1	1	A0A6P6XDC5	A0A6P6XDC5 [703-717]	A0A6P6XDC5	0	1848.98	15	127.9	143.8	151	99	100.2	104.8	90	92.3	96.4	75.7	77.7	75.2	219.8	345.8	387.5	265	131.6	355.1	247.3	270.7	295.2	141.6	251.9	192.2	2	924.997	4.87	0.0045	35.8137	7.779e-05	3.911e-06	2.43
342	High	[K].LPEPGTNDAVDATFR.[L]	1xTMTpro [N-Term]	0.000133789	1	1	2	A0A6P6TFX7	A0A6P6TFX7 [703-717]	A0A6P6TFX7	0	1906.98	15	118.6	122.4	128.8	87.7	82.1	108.8	99.6	101.7	113.9	83.6	96.5	87.9	155.9	225.1	252.7	179.5	82.4	281.8	209.2	228	266.6	119.5	239.2	171.6	2	954.002	7.16	0.00683	38.0814	7.779e-05	1.132e-07	3.38
343	High	[R].LPELNVYGHDYPTPDGSAIR.[D]	1xTMTpro [N-Term]	0.000133789	1	2	1	A0A6P6TT85	A0A6P6TT85 [221-240]	A0A6P6TT85; A0A6P6U2X1	0	2518.29	20	86.3	86.2	103.4	84.8	49.3	95.7	76.4	78.4	93.6	66.8	93.3	89.2	76.6	107.1	137	117.3	33.4	167.4	108.5	118.7	148	64.5	156.3	117.7	3	840.109	9.18	0.00771	42.2255	7.779e-05	4.495e-11	5.06
344	High	[R].LPEGITGEELDIIK.[L]	1xTMTpro [K14]; 1xTMTpro [N-Term]	0.000133789	1	4	1	A0A6P6U9Q2	A0A6P6U9Q2 [185-198]	A0A6P6U9Q2; A0A6P6X7R9; A0A6P6UDN5; A0A6P6U8X2	0	2135.25	14	101.3	78.7	119.9	107.8	133.8	113.7	90.7	101.6	101.3	166.8	102.3	114.1	67.6	73.5	119.4	112	68.2	149.5	96.8	115.6	120.3	121.1	128.8	113.2	3	712.425	7.49	0.00533	48.5768	7.779e-05	1.958e-05	3.72
345	High	[K].LPEEYPDDFEVVR.[W]	1xTMTpro [N-Term]	0.000133789	1	1	1	A0A6P6XG85	A0A6P6XG85 [327-339]	A0A6P6XG85	0	1911.97	13	92.4	109	94.2	75.1	102.6	95.6	100.7	118.9	106.7	155.4	116.4	139.1	17.2	28.4	26.2	21.8	14.6	35.1	30	37.8	35.4	31.5	40.9	38.5	3	637.998	7.43	0.00474	43.5224	7.779e-05	0.0003342	3.22
346	High	[R].LPDIYTDPTSPLYDTLR.[D]	1xTMTpro [N-Term]	0.000133789	1	2	1	A0A6P6W8K5	A0A6P6W8K5 [232-248]	A0A6P6W8K5; A0A6P6VQA2	0	2284.2	17	82.6	78.5	68	60	72.2	60.7	73.7	78.1	77.1	215.6	240.5	283.6	38.2	50.8	46.9	43.2	25.5	55.3	54.5	61.6	63.5	108.5	209.8	194.9	2	1142.61	4.69	0.00536	49.6948	7.779e-05	1.078e-05	3.07
347	High	[K].LPDGYVQEAANPIWEYHK.[Y]	1xTMTpro [K18]; 1xTMTpro [N-Term]	0.000133789	1	4	1	A0A6P6WHD0	A0A6P6WHD0 [586-603]	A0A6P6WHD0; A0A6P6W0H6; A0A6P6VZ59; A0A6P6WJ94	0	2738.44	18	112.3	108.3	111.8	109.2	163.6	99.7	105.9	88.6	93.5	108.8	74.2	87	41	55.3	60.9	62.1	45.6	71.7	61.8	55.2	60.8	43.2	51.1	47.2	4	685.371	6.47	0.00443	45.0367	7.779e-05	1.688e-09	4.22
348	High	[R].IPDAHLLVQAEQSAK.[R]	1xTMTpro [K15]; 1xTMTpro [N-Term]	0.000133789	2	2	1	A0A6P6XGC1; A0A6P6X732	A0A6P6XGC1 [688-702]; A0A6P6X732 [688-702]	A0A6P6XGC1; A0A6P6X732	0	2228.29	15	71.4	65.9	72.3	117	177.2	124.2	86.5	78.8	99.9	160.3	108.9	187.5	58.7	75.8	88.7	149.9	111.3	201.3	113.7	110.5	146.3	143.4	169	229.2	3	743.442	9.41	0.00699	42.5629	7.779e-05	4.196e-08	4.23
349	High	[K].LPAWSVSILPDCK.[N]	1xCarbamidomethyl [C12]; 1xTMTpro [K13]; 1xTMTpro [N-Term]	0.000133789	2	2	2	A0A6P6VXY0; A0A6P6U6L5	A0A6P6VXY0 [397-409]; A0A6P6U6L5 [397-409]	A0A6P6VXY0; A0A6P6U6L5	0	2094.19	13	88.2	93.1	87.8	117.2	102.4	118.4	118.1	115.8	114.6	127.9	152.5	149.7	137.2	202.7	203.8	284.1	121.7	363	293.9	307.4	317.6	216.5	447.7	346.3	2	1047.61	9.28	0.00972	50.567	7.779e-05	2.975e-08	2.14
350	High	[K].LPAVVSNPLSGCTSSTSK.[L]	1xCarbamidomethyl [C12]; 1xTMTpro [K18]; 1xTMTpro [N-Term]	0.000133789	1	2	1	A0A6P6WVE4	A0A6P6WVE4 [87-104]	A0A6P6WVE4; A0A6P6WR28	0	2413.33	18	119.9	112.7	114	91.6	114	100.7	110	101.5	95.2	85.4	88	85.1	99.7	131.2	141.5	118.7	72.4	165	146.3	144.1	141	77.3	138.1	105.2	3	805.122	10.34	0.00832	44.1253	7.779e-05	1.032e-06	4.47
351	High	[K].LPATSISILPDCATEAFNTAK.[V]	1xCarbamidomethyl [C12]; 1xTMTpro [K21]; 1xTMTpro [N-Term]	0.000133789	1	2	2	A0A6P6V063	A0A6P6V063 [387-407]	A0A6P6V063; A0A6P6UFZ3	0	2828.54	21	59.7	70.9	57.7	82.6	87.6	89.2	124	119.4	123.6	195.8	149.6	183.1	40.5	67.3	58.4	87.3	45.4	119.3	134.6	138.2	149.4	144.6	191.5	184.7	3	943.524	7.52	0.00709	49.8877	7.779e-05	3.776e-10	4.63
352	High	[K].LPASMFQEIPTCR.[N]	1xCarbamidomethyl [C12]; 1xTMTpro [N-Term]	0.000133789	1	1	2	A0A6P6T664	A0A6P6T664 [140-152]	A0A6P6T664	0	1853.96	13	92.9	103.9	110.2	101	84	102.3	103.1	98.1	104.2	98.4	110.7	109.4	152.9	239.1	270.6	258.8	105.5	331.6	271.2	275.4	305.4	176.1	343.7	267.6	2	927.491	9.76	0.00905	45.9188	7.779e-05	1.544e-05	3.6
353	High	[R].INVYYNEASGGR.[Y]	1xTMTpro [N-Term]	0.000133789	1	2	1	A0A6P6UGI9	A0A6P6UGI9 [47-58]	A0A6P6UGI9; A0A6P6UBQ7	0	1646.85	12	77.7	123.9	103.6	80.3	30.2	90.2	89.3	97.8	93.1	39.7	109.2	78.2	184	410.8	366.2	296.4	54.6	421	338.2	395.2	393	102.3	488	275.3	2	823.932	6.15	0.00507	28.894	7.779e-05	3.025e-07	3.74
354	High	[R].LNVSLSEGVK.[S]	1xTMTpro [K10]; 1xTMTpro [N-Term]	0.000133789	2	2	1	A0A6P6SS46; A0A6P6STG9	A0A6P6SS46 [152-161]; A0A6P6STG9 [152-161]	A0A6P6SS46; A0A6P6STG9	0	1654	10	83.5	87.1	89.6	99.8	120	94.8	103	113.8	87.4	143.5	111.8	144.9	50.9	74.3	81.6	94.8	55.9	113.9	100.4	118.4	94.9	95.2	128.6	131.4	3	552.009	5.5	0.00303	38.5729	7.779e-05	0.0001355	3.42
355	High	[R].LNVGNAVNPRPSEEDKK.[L]	2xTMTpro [K16; K17]; 1xTMTpro [N-Term]	0.000133789	1	2	3	A0A6P6VM06	A0A6P6VM06 [185-201]	A0A6P6VM06; A0A6P6VM55	1	2779.59	17	100.6	86.2	94.8	98.9	113.5	100.9	90.9	87.6	87.1	118.6	98.5	73.5	371.4	445.1	522.3	568.7	320.1	733.9	536.6	551.5	572.6	476.3	686	403.1	3	927.207	6.58	0.0061	23.4095	7.779e-05	6.768e-06	2.87
356	High	[R].LNVDAFNGDK.[N]	1xTMTpro [K10]; 1xTMTpro [N-Term]	0.000133789	1	2	2	A0A6P6SZR7	A0A6P6SZR7 [238-247]	A0A6P6SZR7; A0A6P6SQ02	0	1700.95	10	103.1	97.2	109.6	92.8	86.6	97	92.9	98.6	104.8	91.9	90.7	130.3	227.7	300.5	361.4	319.3	146.2	422.2	328.1	371.6	412.2	221	377.9	427.9	2	850.982	6.62	0.00563	37.9594	7.779e-05	2.782e-06	3.91
357	High	[R].INTLIEEAGQLR.[A]	1xTMTpro [N-Term]	0.000133789	1	1	1	A0A6P6UN94	A0A6P6UN94 [302-313]	A0A6P6UN94	0	1660.96	12	97.1	126.6	114.6	85	54.8	88.4	103.1	101.3	97.8	63.4	107.7	75.3	110	200.6	193.7	149.9	47.4	197.2	186.7	195.7	197.3	78.1	230	126.8	2	830.991	11.8	0.0098	48.0935	7.779e-05	4.177e-07	3.81
358	High	[R].LNSTVLEEFVAENYTAPR.[I]	1xTMTpro [N-Term]	0.000133789	1	1	1	A0A6P6T1Q1	A0A6P6T1Q1 [238-255]	A0A6P6T1Q1	0	2357.23	18	103.8	120.6	118.4	88.7	83.7	100.2	124.5	98.9	99.4	80	125.3	105.5	31.5	51.2	53.6	41.9	19.4	59.9	60.4	51.2	53.7	26.4	71.7	47.6	3	786.422	8.13	0.00639	50.6564	7.779e-05	1.497e-09	6.5
359	High	[K].LNSQSDSFSFCK.[T]	1xCarbamidomethyl [C11]; 1xTMTpro [K12]; 1xTMTpro [N-Term]	0.000133789	1	1	1	A0A6P6ULX6	A0A6P6ULX6 [36-47]	A0A6P6ULX6	0	2028.04	12	42.7	67.8	50	83.9	99.9	82.1	87.5	102.7	93.5	139.8	122.2	160.1	26	57.8	45.5	79.7	46.5	98.6	85.3	106.8	101.5	92.7	140.5	145.1	3	676.688	7.55	0.0051	38.2655	7.779e-05	1.973e-05	4.26
360	High	[K].LNSFADMTNHEFR.[E]	1xOxidation [M7]; 1xTMTpro [N-Term]	0.000133789	2	2	4	A0A6P6VAA7; A0A6P6UXR6	A0A6P6VAA7 [84-96]; A0A6P6UXR6 [84-96]	A0A6P6VAA7; A0A6P6UXR6	0	1901.91	13	104.5	119.7	110.6	83.2	80	93.1	106.3	104.3	109.5	75.2	96.4	85.4	327.5	524.7	517.3	406	191.5	575	532.4	557.7	611	256.2	569.6	397.6	3	634.648	8.78	0.00557	28.3365	7.779e-05	1.426e-06	3.64
361	High	[R].IPGLKPGLAAGLPGK.[C]	2xTMTpro [K5; K15]; 1xTMTpro [N-Term]	0.000133789	1	1	2	A0A6P6SN27	A0A6P6SN27 [85-99]	A0A6P6SN27	0	2301.48	15	58.9	70.3	73.9	158.1	179.2	162.5	92	87.8	88.2	135.4	111.3	126	88.6	148	165.9	370.5	205.9	481.7	221.3	225.4	236.3	221.6	316	281.8	3	767.838	6.24	0.00479	44.6536	7.779e-05	1.09e-05	3.65
362	High	[R].LPVDVVSGDGQVVAVEGYFGHR.[S]	1xTMTpro [N-Term]	0.000133789	1	1	1	A0A6P6UG48	A0A6P6UG48 [152-173]	A0A6P6UG48	0	2604.37	22	116.3	102.1	93.9	83.3	113.3	93.6	92.6	100.9	90.8	95.9	97.5	83.7	118.4	145.4	142.7	132.1	88.1	187.7	150.7	175.3	164.7	106.2	187.3	126.6	3	868.807	12.49	0.01084	47.7274	7.779e-05	7.645e-11	4.86
363	High	[R].IPGLNPGLAAGLPGK.[C]	1xTMTpro [N-Term]; 1xTMTpro [K15]	0.000133789	1	1	2	A0A6P6SYC1	A0A6P6SYC1 [85-99]	A0A6P6SYC1	0	1679.02	15	91.1	94.8	92.6	87.5	140.8	88.5	91.6	89.3	92.1	129.4	98.6	96.9	247.5	360.3	375.5	370.2	292	473.6	397.8	414	445.5	382.3	505.4	391.3	2	840.017	5.09	0.00427	43.7548	7.779e-05	2.383e-05	3.87
364	High	[R].LPGNADLDK.[V]	1xTMTpro [K9]; 1xTMTpro [N-Term]	0.000133789	1	1	1	A0A6P6WE10	A0A6P6WE10 [136-144]	A0A6P6WE10	0	1550.9	9	52.7	57.1	47.2	252.2	225.8	253	52.7	59.4	53.9	111.9	87.9	127.4	94	142.3	125.6	699.9	307.3	888.4	150.1	180.5	171	217	295.4	337.4	2	775.958	3.38	0.00262	30.8913	7.779e-05	7.016e-05	3.79
365	High	[K].LPTFSDLFGGGGK.[S]	1xTMTpro [K13]; 1xTMTpro [N-Term]	0.000133789	1	1	4	A0A6P6W0K2	A0A6P6W0K2 [143-155]	A0A6P6W0K2	0	1904.08	13	91.7	84.9	83.2	111.9	150.4	98.8	116.9	101.8	106.6	134.5	106.9	136.9	289	374.3	391.2	549.3	361.9	613.7	589.1	547.5	598.5	461.3	635.5	641.5	2	952.55	8.14	0.00775	51.9262	7.779e-05	1.477e-09	4.43
366	High	[R].LPTDDTLLAQIK.[G]	1xTMTpro [K12]; 1xTMTpro [N-Term]	0.000133789	1	1	1	A0A6P6T3Q2	A0A6P6T3Q2 [117-128]	A0A6P6T3Q2	0	1936.16	12	89.5	93.1	102.4	107.9	124.5	90.3	77.8	72.3	72.5	160.8	94.5	181.3	35.2	51.2	60.1	66.1	37.4	70	48.9	48.5	50.8	68.8	70.1	106	3	646.065	9.74	0.00629	47.7678	7.779e-05	5.148e-06	4.13
367	High	[K].IPSYPDEYNK.[W]	1xTMTpro [K10]; 1xTMTpro [N-Term]	0.000133789	1	1	2	A0A6P6ST27	A0A6P6ST27 [38-47]	A0A6P6ST27	0	1833.99	10	130.9	107.7	129.6	105.8	116.6	107.4	64.8	66.7	77.1	64.8	55.8	64.5	413.5	475.9	611.1	520.3	281.4	668.3	327.5	359.6	433.5	222.7	332.4	303	2	917.502	5.33	0.00489	33.2878	7.779e-05	8.651e-05	3.29
368	High	[R].IPSPSSSGGTSGER.[T]	1xTMTpro [N-Term]	0.000133789	1	3	2	A0A6P6TKB7	A0A6P6TKB7 [7-20]	A0A6P6SCF5; A0A6P6T6V6; A0A6P6TKB7	0	1622.83	14	113.7	110	103	95.2	71.1	97.6	111.3	107.4	97.2	70.3	97.6	82.6	263.2	356.2	355.7	343.3	125.6	445.3	411.7	424.2	400.4	177.1	425.9	284.2	2	811.926	8.2	0.00665	16.2951	7.779e-05	3.669e-05	2.42
369	High	[K].LPSLLPIVGEPELEREQGDR.[R]	1xTMTpro [N-Term]	0.000133789	1	1	1	A0A6P6VT19	A0A6P6VT19 [17-36]	A0A6P6VT19	1	2551.41	20	109.2	109.6	125.8	95.3	87.2	114.8	100.3	105.4	112.6	100.1	94.6	71.2	136.2	191.2	234.2	185.2	83.1	282.1	200.1	224.3	250.2	135.9	222.5	132	3	851.146	7.27	0.00618	49.1076	7.779e-05	2.333e-06	3.58
370	High	[K].LPSLLPIVGEPELER.[E]	1xTMTpro [N-Term]	0.000133789	1	1	1	A0A6P6VT19	A0A6P6VT19 [17-31]	A0A6P6VT19	0	1966.15	15	100.1	127.1	115.5	108.1	85.8	123.3	107.9	104.8	101.9	104.8	97.6	108.2	22.3	39.6	38.4	37.5	14.6	54.1	38.4	39.8	40.4	25.4	41	35.8	3	656.061	7.2	0.00472	52.4421	7.779e-05	5.76e-05	3
371	High	[K].LPSHYLVSPPEIER.[T]	1xTMTpro [N-Term]	0.000133789	2	2	3	A0A6P6VEE2; A0A6P6SCM7	A0A6P6VEE2 [327-340]; A0A6P6SCM7 [327-340]	A0A6P6VEE2; A0A6P6SCM7	0	1941.08	14	120.6	109.5	92.9	98	121.2	94.4	105.6	101.4	107	112.8	92.9	109.9	93.8	119.2	107.9	118.8	72	144.8	131.3	134.6	148.2	95.5	136.3	127.1	3	647.702	7.47	0.00483	38.1306	7.779e-05	7.787e-05	3.85
372	High	[R].IPSAVGYQPTLATDLGGLQER.[I]	1xTMTpro [N-Term]	0.000133789	2	2	4	A0A6P6V6E0; A0A6P6VBW3	A0A6P6V6E0 [350-370]; A0A6P6VBW3 [350-370]	A0A6P6V6E0; A0A6P6VBW3	0	2490.35	21	83.7	87.2	96.2	106	44.5	120.5	102.6	111	118.7	75.6	119.1	117.7	380.8	554.9	653.2	750.8	154.7	1080	746.2	861	961.8	374.2	1022.1	795.6	2	1245.69	6.58	0.00819	46.3392	7.779e-05	1.33e-10	4.08
373	High	[K].LPSADSIVVR.[R]	1xTMTpro [N-Term]	0.000133789	1	1	1	A0A6P6TBE3	A0A6P6TBE3 [252-261]	A0A6P6TBE3	0	1360.81	10	111.9	107.9	109.5	104	81.4	98.4	79.9	88.1	81.4	76	79.1	92.8	167.1	225.5	244.1	241.9	92.8	289.7	190.7	224.4	216.6	123.5	222.8	206	2	680.914	7	0.00476	35.892	7.779e-05	4.77e-05	2.41
374	High	[K].LPQQQFDLVFDR.[N]	1xTMTpro [N-Term]	0.000133789	1	2	2	A0A6P6T2S0	A0A6P6T2S0 [64-75]	A0A6P6T2S0; A0A6P6T295	0	1809.98	12	108.7	118.9	124.3	116	65.8	120.9	116.6	102.9	112	83.9	110.8	142.2	85.7	131.1	146.3	142.4	39.6	187.8	147	138.4	157.2	72	164.8	166.6	3	604.002	4.92	0.00297	46.526	7.779e-05	1.549e-05	3.14
375	High	[K].LPQGEQLLADAPEMIEK.[V]	1xOxidation [M14]; 1xTMTpro [K17]; 1xTMTpro [N-Term]	0.000133789	1	2	2	A0A6P6ST63	A0A6P6ST63 [161-177]	A0A6P6T581; A0A6P6ST63	0	2506.37	17	93.3	95.9	98.3	86.4	121.2	97.3	110	98	105.9	144.5	108.3	127.4	94	135.2	147.8	135.6	93.2	193.1	177.2	168.4	190	158.4	205.7	190.7	3	836.135	7.73	0.00645	45.4589	7.779e-05	3.29e-09	4.94
376	High	[K].LPQGEQLLADAPEMIEK.[V]	1xTMTpro [K17]; 1xTMTpro [N-Term]	0.000133789	1	2	1	A0A6P6ST63	A0A6P6ST63 [161-177]	A0A6P6T581; A0A6P6ST63	0	2490.38	17	82.1	81.5	95.4	109.8	136.8	116.6	92.2	88	95	157.4	103.4	134.6	50	69.4	86.7	104.1	63.6	139.9	89.8	91.4	103	104.3	118.8	121.8	3	830.806	10.54	0.00875	49.0766	7.779e-05	1.031e-08	4.75
377	High	[R].LPQDVSDEIEEDPTGGK.[I]	1xTMTpro [K17]; 1xTMTpro [N-Term]	0.000133789	1	1	1	A0A6P6VNH9	A0A6P6VNH9 [1054-1070]	A0A6P6VNH9	0	2437.26	17	97.7	81	106.7	104.1	126.7	107	99.6	98.4	117.1	139.9	101.1	95	62.5	72.5	101.9	103.8	61.9	134.9	101.9	107.4	133.5	97.4	122	90.4	3	813.098	7.97	0.00648	40.1214	7.779e-05	1.259e-06	3.9
378	High	[K].LPQDASLYGLGENTQPHGIK.[L]	1xTMTpro [K20]; 1xTMTpro [N-Term]	0.000133789	1	1	2	A0A6P6V1Z7	A0A6P6V1Z7 [187-206]	A0A6P6V1Z7	0	2746.5	20	109.7	75.7	94.5	89.1	112.5	87.3	77.8	80.5	93.6	141.1	81.9	102.8	254.7	246	327.7	322.4	199.6	399.3	288.9	318.8	387	356.5	358.6	354.9	3	916.178	6.21	0.00569	41.0226	7.779e-05	2.437e-17	6.09
379	High	[R].LPPVEEIK.[T]	1xTMTpro [K8]; 1xTMTpro [N-Term]	0.000133789	1	3	1	A0A6P6T1U6	A0A6P6T1U6 [111-118]	A0A6P6T1U6; A0A6P6SPM1; A0A6P6T1U4	0	1532.95	8	60.5	54.6	64.7	65.7	87.2	67.1	71.8	80.6	81.3	128.7	83.4	102	103.7	130.9	165.6	175.3	114.1	226.8	196.7	235.7	248.1	240.1	269.8	259.8	3	511.661	8.44	0.00431	40.322	7.779e-05	9.077e-05	3.15
380	High	[K].LPPLGPHDVR.[V]	1xTMTpro [N-Term]	0.000133789	2	2	1	A0A6P6WTY8; A0A6P6V5Q3	A0A6P6WTY8 [36-45]; A0A6P6V5Q3 [36-45]	A0A6P6WTY8; A0A6P6V5Q3	0	1404.83	10	119.8	129.3	123.1	128.4	85.5	120.7	91.5	90.5	104.5	106	93.5	103.1	39.8	60.1	61	66.4	21.7	79	48.6	51.3	61.8	38.3	58.6	50.9	3	468.95	5.21	0.00244	26.2691	7.779e-05	6.004e-07	3.58
381	High	[K].IPPEITAALEPIKDNEEAVR.[N]	1xTMTpro [K13]; 1xTMTpro [N-Term]	0.000133789	1	2	5	A0A6P6UZI7	A0A6P6UZI7 [242-261]	A0A6P6UZI7; A0A6P6V7M2	1	2813.59	20	91	84	98.1	113.9	115.5	119.5	101.7	100.7	108.1	127.4	100.2	116.1	430.9	556.5	693.9	840.1	418	1115.6	770.3	813.9	912	656.9	895.6	817.8	3	938.543	8.11	0.00761	53.0498	7.779e-05	1.04e-16	5.8
382	High	[R].LPPAAYSALR.[S]	1xTMTpro [N-Term]	0.000133789	1	2	5	A0A6P6S6X1	A0A6P6S6X1 [368-377]	A0A6P6TT74; A0A6P6S6X1	0	1362.81	10	76.9	84.9	80.7	120.3	71.2	122.2	108.2	119.4	114.8	100.5	121.7	132.3	174.6	269.5	273.2	425.2	123.4	546.6	392.5	462.4	463.8	248.2	520.9	446.2	2	681.911	6.62	0.00451	37.607	7.779e-05	0.0002204	2.27
383	High	[K].LPPAAGIGGLDTCYDLSSTPTR.[D]	1xCarbamidomethyl [C13]; 1xTMTpro [N-Term]	0.000133789	1	1	1	A0A6P6X6P9	A0A6P6X6P9 [375-396]	A0A6P6X6P9	0	2566.31	22	74.9	80.1	78.4	99.5	173.7	94	104.7	94.4	96	195.2	113.7	120.5	41.2	61.7	64.4	85.3	73	102	92.1	88.6	94.1	116.9	118.1	98.6	3	856.116	6.95	0.00595	44.754	7.779e-05	5.843e-09	5.36
384	High	[K].LPNFFEFDLSNNK.[L]	1xTMTpro [K13]; 1xTMTpro [N-Term]	0.000133789	1	4	1	A0A6P6T8G8	A0A6P6T8G8 [289-301]	A0A6P6T8G8; A0A6P6TM77; A0A6P6TNQ3; A0A6P6T778	0	2193.18	13																									3	731.738	7.46	0.00545	52.5933	7.779e-05	0.0002579	2.94
385	High	[K].IPLTLIYDDIK.[S]	1xTMTpro [K11]; 1xTMTpro [N-Term]	0.000133789	1	2	2	A0A6P6WTN6	A0A6P6WTN6 [125-135]	A0A6P6WTN6; A0A6P6WTS2	0	1912.17	11	75.2	65	78.5	129.6	160.1	116.3	100.8	98.5	88.2	165.8	103.9	137.1	34.4	41.6	53.6	92.3	55.9	104.8	73.7	76.8	71.8	82.5	89.6	93.2	2	956.593	6.65	0.00636	53.2944	7.779e-05	4.695e-07	4.17
386	High	[K].IPILSSLQLSAER.[G]	1xTMTpro [N-Term]	0.000133789	1	1	8	A0A6P6WMC4	A0A6P6WMC4 [340-352]	A0A6P6WMC4	0	1731.03	13	105.1	138.5	112.1	80.7	61.4	90.3	98.3	99.7	105.3	90.7	185.2	209.5	196	361.2	312	234.2	87.4	331.6	293.1	317.2	349.5	183.9	651.5	580.6	3	577.69	12.12	0.007	51.452	7.779e-05	4.443e-07	3.46
387	High	[R].LPIEITIGELK.[K]	1xTMTpro [K11]; 1xTMTpro [N-Term]	0.000133789	1	2	1	A0A6P6WNM9	A0A6P6WNM9 [140-150]	A0A6P6WNM9; A0A6P6X0I6	0	1834.15	11	80	90.3	56.1	108.4	133.6	96	136.5	121.6	128.2	226.3	142	178.2	18.8	29.7	19.7	39.7	24	44.5	51.3	48.8	53.7	57.9	63	62.3	3	612.061	7.46	0.00456	52.2211	7.779e-05	1.433e-05	2.98
388	High	[K].LPLDASLYGLGENTQPHGIK.[L]	1xTMTpro [K20]; 1xTMTpro [N-Term]	0.000133789	1	1	2	A0A6P6VC73	A0A6P6VC73 [187-206]	A0A6P6VC73	0	2731.53	20	90.1	86	86.3	91.2	113.5	92.3	89.4	90.1	90.5	119.3	99.9	91.6	139.9	186.9	199.9	220.5	134.6	282.3	221.9	238.7	250.2	201.6	292.6	211.4	4	683.643	8.69	0.00593	45.8629	7.779e-05	0.0001072	3.39
389	High	[R].LPHYSNVPK.[F]	1xTMTpro [K9]; 1xTMTpro [N-Term]	0.000133789	1	1	26	A0A6P6WMC4	A0A6P6WMC4 [87-95]	A0A6P6WMC4	0	1662.98	9	109.5	90	88.8	91	204	85.2	89.2	84.7	91.1	145.8	74.1	85.4	1589.2	1827.7	1924.1	2057	2261.7	2438.5	2071.4	2098.1	2356.4	2303.7	2030	1842.5	2	831.998	4.07	0.00338	24.2674	7.779e-05	4.227e-05	3.09
390	High	[K].LPGYCGIPGDISACK.[A]	2xCarbamidomethyl [C5; C14]; 1xTMTpro [K15]; 1xTMTpro [N-Term]	0.000133789	1	1	1	A0A6P6TWE5	A0A6P6TWE5 [93-107]	A0A6P6TWE5	0	2216.17	15	105.6	71.3	93.6	110.6	145.9	112.3	80.8	80.6	98.8	156.9	93.2	139.8	77.1	72.8	102	125.8	81.4	161.6	94.4	100.4	128.5	124.7	128.4	151.7	3	739.399	5.97	0.00441	43.0745	7.779e-05	1.786e-06	2.65
391	High	[R].LPGVGLVGQIPANTLGR.[L]	1xTMTpro [N-Term]	0.000133789	1	1	1	A0A6P6T045	A0A6P6T045 [88-104]	A0A6P6T045	0	1966.18	17	92.5	120.3	104.4	103.2	73.5	113.7	106.1	112.4	84.6	69.3	135	113.8	22.1	40.2	37.2	38.4	13.4	53.5	40.5	45.8	36	18	60.8	40.4	3	656.069	7.42	0.00486	47.9921	7.779e-05	8.833e-09	3.73
392	High	[K].IPGNENDNQK.[G]	1xTMTpro [K10]; 1xTMTpro [N-Term]	0.000133789	1	5	3	A0A6P6WWV0	A0A6P6WWV0 [90-99]	A0A6P6WR62; A0A6P6WWC7; A0A6P6WT03; A0A6P6WWV0; A0A6P6WQQ4	0	1736.94	10	49.3	61.3	51.8	60.4	51.9	55.9	146.7	139.4	97.4	145.6	159.6	292.6	199.7	347.5	312.9	381	160.4	445.7	949.4	962.9	702.4	641.4	1219.1	1760.8	2	868.979	5.22	0.00453	17.5933	7.779e-05	1.073e-05	3.03
393	High	[R].LPGNADLDKVQAHLENGVLEIVVPK.[L]	2xTMTpro [K9; K25]; 1xTMTpro [N-Term]	0.000133789	1	1	2	A0A6P6WE10	A0A6P6WE10 [136-160]	A0A6P6WE10	1	3581.09	25	42.9	41.3	33.8	212.8	280.9	251.2	45.1	49.3	46.9	108.3	72.4	63.1	82.3	110.9	96.9	635.7	411.5	949.6	138.3	161.2	160.3	226	262.1	180	4	896.035	8.66	0.00775	49.7564	7.779e-05	3.426e-11	5.6
394	High	[R].IPGLNPGLAAGLPGK.[C]	1xTMTpro [K15]; 1xTMTpro [N-Term]	0.000133789	1	1	6	A0A6P6SYC1	A0A6P6SYC1 [85-99]	A0A6P6SYC1	0	1983.22	15	98.6	101.2	107.3	105.4	105.4	116.3	100.8	101.9	102.7	110.1	100.1	99.9	402.1	577.3	653	669.9	328.2	935.1	657.5	709.2	745.7	488.6	770.2	605.7	2	992.123	6.84	0.00678	47.4469	7.779e-05	7.779e-09	4.65
395	High	[R].ITQQEFTDMAWQAIVSSPEVAK.[E]	1xTMTpro [K22]; 1xTMTpro [N-Term]	0.000133789	1	1	1	A0A6P6T8I6	A0A6P6T8I6 [83-104]	A0A6P6T8I6	0	3087.63	22	79.2	95.7	92.2	69.8	98.4	76.9	84	79.6	75.3	102.2	93.4	90	91.5	154.6	159	125.5	86.8	175.1	155.2	156.9	155	128.5	203.5	154.5	3	1029.89	9.74	0.01003	53.4346	7.779e-05	2.05e-10	3.94
396	High	[R].LREEQDAAYR.[A]	1xTMTpro [N-Term]	0.000133789	1	1	2	A0A6P6TS47	A0A6P6TS47 [305-314]	A0A6P6TS47	1	1554.82	10	103.6	103.7	111.2	130.1	54.4	130.4	133.8	121.2	153.2	58.7	122.9	118.4	33.9	47.5	54.3	66.3	13.6	84.1	70	67.7	89.3	20.9	75.9	57.6	2	777.919	7.05	0.00548	12.8737	7.779e-05	0.0001504	2.25
397	High	[K].LRLDSANPVADAESIVAK.[A]	1xTMTpro [K18]; 1xTMTpro [N-Term]	0.000133789	1	3	1	A0A6P6UED5	A0A6P6UED5 [378-395]	A0A6P6XFQ1; A0A6P6UED5; A0A6P6XB31	1	2477.42	18																									3	826.485	7.98	0.00659	46.0832	7.779e-05	7.518e-05	2.33
398	High	[R].LTCEAQQCK.[S]	2xCarbamidomethyl [C3; C8]; 1xTMTpro [K9]; 1xTMTpro [N-Term]	0.000133789	1	2	1	A0A6P6VA66	A0A6P6VA66 [201-209]	A0A6P6VA66; A0A6P6V4Q1	0	1745.92	9	72.6	69.2	60.7	78.3	72.3	93.4	129.1	140.5	152.7	77.3	86.8	91.5	55	73.3	68.6	92.3	41.8	139.3	156.3	181.5	205.9	63.7	123.9	103	2	873.465	3.38	0.00295	17.9337	7.779e-05	2.462e-05	2.65
399	High	[K].ITAIPAKEEEIWGAK.[F]	2xTMTpro [K7; K15]; 1xTMTpro [N-Term]	0.000133789	1	2	1	A0A6P6X2P1	A0A6P6X2P1 [209-223]	A0A6P6UYL3; A0A6P6X2P1	1	2568.52	15	81.2	83.9	115.5	85.7	89.2	97.4	93.6	94.7	95.3	184.6	153.9	147.2	86.5	125	183.7	142.2	72.6	204.5	159.4	172.1	180.9	214	309.4	233.2	3	856.853	9.23	0.0079	44.5256	7.779e-05	5.471e-05	3.58
400	High	[K].ITALFDFPR.[Y]	1xTMTpro [N-Term]	0.000133789	1	1	1	A0A6P6UMM6	A0A6P6UMM6 [132-140]	A0A6P6UMM6	0	1383.8	9	73.1	97.3	88.8	107	49.3	110.2	143.7	147.8	129.7	81.3	147.1	117.3	42.7	79.6	77.5	97.4	22	127	134.3	147.4	135	51.7	162.2	101.9	2	692.409	10.61	0.00734	51.5343	7.779e-05	0.0003136	2.68
401	High	[K].LTAFDHSNLLFEYK.[K]	1xTMTpro [K14]; 1xTMTpro [N-Term]	0.000133789	3	6	1	A0A6P6V2Y3; A0A6P6VBL8; A0A6P6V238	A0A6P6V2Y3 [534-547]; A0A6P6VBL8 [563-576]; A0A6P6V238 [563-576]	A0A6P6V2Y3; A0A6P6VBL8; A0A6P6VAY6; A0A6P6V3E3; A0A6P6VBM2; A0A6P6V238	0	2306.27	14	93.8	103.4	103.7	95.3	124.3	100.9	114.7	101.8	104.4	129.6	106.5	128.7	106.7	164.5	176	168.8	107.9	226	208.5	197.4	211.4	160.3	228.4	217.5	3	769.433	7.43	0.00571	46.9222	7.779e-05	1.135e-05	3.47
402	High	[K].ITAAALVNR.[F]	1xTMTpro [N-Term]	0.000133789	1	1	1	A0A6P6X2P1	A0A6P6X2P1 [28-36]	A0A6P6X2P1	0	1232.76	9	95.3	104.2	92	94.2	89.1	102.7	104.6	109.1	99.1	105.1	173.1	158.7	118.7	181.5	170.9	182.6	84.7	252	208.3	231.7	219.8	142.4	406.6	293.7	2	616.888	3.65	0.00225	31.3267	7.779e-05	0.000108	2.08
403	High	[K].LSVTSAIPEGPGR.[Y]	1xTMTpro [N-Term]	0.000133789	1	2	2	A0A6P6SRC1	A0A6P6SRC1 [490-502]	A0A6P6SRC1; A0A6P6T383	0	1587.9	13	128.5	117.2	112.9	96.7	102.1	106.2	130.4	101.1	104.1	93.4	106.2	84.6	162.7	207.6	213.4	190.7	98.7	264.9	263.9	218.5	234.8	128.7	253.6	159.3	2	794.459	5.6	0.00444	34.9539	7.779e-05	1.279e-05	3.03
404	High	[K].LSVIMEAEALNK.[A]	1xOxidation [M5]; 1xTMTpro [K12]; 1xTMTpro [N-Term]	0.000133789	3	3	11	A0A6P6WJH1; A0A6P6VYK5; A0A6P6VV49	A0A6P6WJH1 [171-182]; A0A6P6VYK5 [171-182]; A0A6P6VV49 [171-182]	A0A6P6WJH1; A0A6P6VYK5; A0A6P6VV49	0	1942.12	12	124.3	89.2	93.3	80.5	118.9	66.5	120.3	107.9	102.1	99.3	93.3	85.6	1033	1038	1157.8	1041.8	755	1090.1	1598.7	1530	1511.6	898.4	1464	1058.2	2	971.567	4.91	0.00477	45.997	7.779e-05	5.771e-07	3.8
405	High	[K].LSVIMEAEALNK.[A]	1xTMTpro [K12]; 1xTMTpro [N-Term]	0.000133789	3	3	11	A0A6P6WJH1; A0A6P6VYK5; A0A6P6VV49	A0A6P6WJH1 [171-182]; A0A6P6VYK5 [171-182]; A0A6P6VV49 [171-182]	A0A6P6WJH1; A0A6P6VYK5; A0A6P6VV49	0	1926.12	12	96.2	88.2	93.3	96.9	134.5	87.4	117.5	105.8	111	121.4	112.3	103.9	734.9	942.3	1063.3	1152.1	784.5	1315.1	1434.2	1378.1	1509	1008.8	1617.7	1179.2	2	963.571	6.68	0.00643	48.7541	7.779e-05	2.556e-08	3.8
406	High	[K].LSVGYSLDQIPNDITK.[K]	1xTMTpro [K16]; 1xTMTpro [N-Term]	0.000133789	1	2	1	A0A6P6UL36	A0A6P6UL36 [429-444]	A0A6P6UL36; A0A6P6URB8	0	2371.34	16	94.2	91.5	95.6	101.9	127.4	102.4	95.4	111.4	101.7	143.2	111.8	126	94.3	128.2	142.8	158.8	97.4	202	152.7	190.2	181.3	156	211.1	187.4	3	791.125	10.74	0.00849	47.215	7.779e-05	1.667e-05	3.21
407	High	[K].LSVDDSSAGK.[L]	1xTMTpro [K10]; 1xTMTpro [N-Term]	0.000133789	1	1	1	A0A6P6XD71	A0A6P6XD71 [78-87]	A0A6P6XD71	0	1586.89	10	87.7	93.3	103	98.1	86.6	97.5	93.3	97.6	94.1	89.9	96.9	90.7	184.9	275.1	324	322.1	139.3	404.8	314.3	350.8	353.3	206.2	385.1	284.2	2	793.953	6.45	0.00512	23.1735	7.779e-05	1.059e-06	3.74
408	High	[R].ISTYWGQDATEGSLK.[E]	1xTMTpro [K15]; 1xTMTpro [N-Term]	0.000133789	1	1	1	A0A6P6V9D2	A0A6P6V9D2 [29-43]	A0A6P6V9D2	0	2264.21	15	121.4	94.9	113.2	90.4	89.4	92.7	68.5	79.2	75.7	87.2	94.3	111	208.1	227.5	289.6	241.4	117	313	187.8	231.6	231	162.6	304.9	282.8	3	755.408	1.56	0.00118	42.6081	7.779e-05	2.644e-05	3.91
409	High	[K].ISTVNPYTVLETSIYK.[A]	1xTMTpro [K16]; 1xTMTpro [N-Term]	0.000133789	1	1	1	A0A6P6V2V7	A0A6P6V2V7 [302-317]	A0A6P6V2V7	0	2436.39	16	113.1	119.3	118.5	129.6	208	136	87.8	83.2	83.4	96.4	82.6	75.3	51.6	76.2	80.7	92.1	72.5	122.3	64.1	64.8	67.8	47.9	71.1	51.1	3	812.807	7.37	0.00598	51.2452	7.779e-05	4.281e-07	2.68
410	High	[R].ISTSNAQLGLPELQLGILPGFGGTQR.[L]	1xTMTpro [N-Term]	0.000133789	1	2	2	A0A6P6X5B8	A0A6P6X5B8 [129-154]	A0A6P6X5B8; A0A6P6WR29	0	2971.65	26	80.2	119.5	107.4	122.3	124.6	127.1	133.1	121.8	122.5	103.7	127.3	99.6	57.3	119.4	114.5	136.1	68	178.9	152	148.5	155.9	80.6	171.5	105.8	3	991.233	10.6	0.0105	53.9103	7.779e-05	4.38e-13	6.34
411	High	[R].LSTNAPGVPLDDR.[N]	1xTMTpro [N-Term]	0.000133789	1	2	1	A0A6P6VL10	A0A6P6VL10 [148-160]	A0A6P6VL10; A0A6P6TW55	0	1658.9	13	105.7	106.4	108.1	85.9	92.1	106.8	97.7	100.7	101.5	98.7	99.2	87.1	56.5	79.6	86.2	71.5	37.6	112.5	83.5	91.8	96.6	57.4	100	69.2	3	553.642	5.1	0.00282	29.9685	7.779e-05	4.705e-06	3.6
412	High	[R].LSTFWLPELR.[R]	1xTMTpro [N-Term]	0.000133789	1	2	1	A0A6P6VYH9	A0A6P6VYH9 [107-116]	A0A6P6VYH9; A0A6P6WHB5	0	1565.9	10																									2	783.461	8.79	0.00688	52.4016	7.779e-05	0.0002458	2.21
413	High	[K].ISTDGTIMEWAK.[D]	1xTMTpro [K12]; 1xTMTpro [N-Term]	0.000133789	1	2	1	A0A6P6VSM8	A0A6P6VSM8 [616-627]	A0A6P6VSM8; A0A6P6WD89	0	1960.07	12	91.1	93.6	89.2	90.8	138	104.1	91.7	96.1	108.3	139.5	86.9	85.5	21	30.2	30.7	32.6	24.3	47.3	33.8	37.8	44.5	35	37.8	29.3	3	654.035	9.75	0.00637	45.8467	7.779e-05	4.123e-05	3.23
414	High	[K].LSSQETERPDLGNAR.[V]	1xTMTpro [N-Term]	0.000133789	1	1	1	A0A6P6S9N0	A0A6P6S9N0 [223-237]	A0A6P6S9N0	0	1977.03	15																									3	659.686	5.91	0.0039	16.8267	7.779e-05	1.19e-05	1.64
415	High	[K].LSSLSDSSEVSFK.[Y]	1xTMTpro [K13]; 1xTMTpro [N-Term]	0.000133789	1	3	1	A0A6P6UIR9	A0A6P6UIR9 [84-96]	A0A6P6UIR9; A0A6P6UWS4; A0A6P6UV00	0	1994.09	13	93.1	86.4	114.1	102.3	149.9	111.8	99.1	92.5	100.2	134.2	111.7	114.3	49.6	64.4	90.7	84.9	61	117.4	84.4	84.1	95.1	77.8	112.3	90.5	3	665.375	8.65	0.00575	42.2939	7.779e-05	8.327e-06	3.7
416	High	[R].LSSINVENVESNRR.[A]	1xTMTpro [N-Term]	0.000133789	1	1	6	A0A6P6SVX1	A0A6P6SVX1 [40-53]	A0A6P6SVX1	1	1921.04	14	99.2	135.8	125.5	90.9	61.3	106.5	108.3	108.3	114.9	60.9	116.4	86.4	398.5	763.1	752.5	568.5	188.1	843.3	695.3	742.1	822.2	266.3	882	515.9	3	641.024	7.14	0.00458	27.1543	7.779e-05	5.028e-09	4.21
417	High	[R].LSSINVENVESNRR.[A]		0.000133789	1	1	1	A0A6P6SVX1	A0A6P6SVX1 [40-53]	A0A6P6SVX1	1	1616.84	14																									3	539.621	8.33	0.00449	14.7064	7.779e-05	1.49e-05	4.36
418	High	[R].LSSINVENVESNR.[R]	1xTMTpro [N-Term]	0.000133789	1	1	2	A0A6P6SVX1	A0A6P6SVX1 [40-52]	A0A6P6SVX1	0	1764.94	13	90.9	122.6	109.9	90	57.9	113.4	109.1	117.9	117.7	65.4	123.4	101	223.8	422.4	403.7	345.1	108.9	550.4	429.3	495.1	516.1	175.1	573	369.7	2	882.984	10.64	0.00939	32.5299	7.779e-05	4.318e-09	3.82
419	High	[K].LSSHNPKPSPPK.[D]	2xTMTpro [K7; K12]; 1xTMTpro [N-Term]	0.000133789	2	2	1	A0A6P6VAA7; A0A6P6UXR6	A0A6P6VAA7 [345-356]; A0A6P6UXR6 [345-356]	A0A6P6VAA7; A0A6P6UXR6	0	2201.32	12	75.1	83	80.8	76.9	221.9	73.1	87.6	85.7	75.7	167.4	66.5	75.6	51.2	79.2	82.2	81.7	115.6	98.3	95.5	99.7	91.9	124.2	85.5	76.6	4	551.09	6.4	0.00352	16.4593	7.779e-05	8.574e-05	3.58
420	High	[K].LSSEVGWNHYDTIR.[E]	1xTMTpro [N-Term]	0.000133789	1	1	1	A0A6P6WUF9	A0A6P6WUF9 [146-159]	A0A6P6WUF9	0	1981.01	14	73.2	83	88.2	112.3	100.9	110.9	96.8	112.2	118.5	141	127	128.1	80	126.9	143.9	191.1	84.2	238.9	169.1	209.2	230.6	167.7	261.9	208.1	3	661.013	7.37	0.00486	32.3405	7.779e-05	4.607e-07	5.47
421	High	[R].LSSEVGWNHADTIR.[E]	1xTMTpro [N-Term]	0.000133789	1	1	1	A0A6P6URV2	A0A6P6URV2 [146-159]	A0A6P6URV2	0	1888.98	14																									3	630.335	3.06	0.00192	27.7141	7.779e-05	4.807e-05	3.09
422	High	[K].ISSEELAGVMK.[A]	1xTMTpro [K11]; 1xTMTpro [N-Term]	0.000133789	1	1	2	A0A6P6XC29	A0A6P6XC29 [50-60]	A0A6P6XC29	0	1772.01	11	100.2	99.4	112.3	82.6	109.3	101.5	91	91.4	125	107.2	91.6	82.4	129.3	179.5	216.3	166.1	107.7	258.1	187.7	201.2	287.3	150.5	223.1	158.1	2	886.516	7.13	0.00632	42.0298	7.779e-05	6.395e-08	3.68
423	High	[R].ISSDPQSIMAEVYK.[N]	1xTMTpro [K14]; 1xTMTpro [N-Term]	0.000133789	2	2	1	A0A6P6VUU8; A0A6P6WGS6	A0A6P6VUU8 [234-247]; A0A6P6WGS6 [234-247]	A0A6P6VUU8; A0A6P6WGS6	0	2176.18	14	93.4	99.5	105.5	75.6	86.1	90.9	96.5	103.6	114.9	107.8	100.5	86.3	362.1	540.1	610.8	456.9	255	694.7	598.5	685.8	793.5	455	735.6	497.5	2	1088.6	1.65	0.00179	45.6349	7.779e-05	1.779e-09	5.12
424	High	[R].ISSDPQNIMAEVYK.[N]	1xOxidation [M9]; 1xTMTpro [K14]; 1xTMTpro [N-Term]	0.000133789	1	1	1	A0A6P6VWH0	A0A6P6VWH0 [235-248]	A0A6P6VWH0	0	2219.19	14	96.7	116.1	107	85.6	96.1	101.1	109.2	106	111.7	84.9	96.1	81.5	113.2	190.1	187	156.1	85.9	233.2	204.4	211.6	232.9	108.1	212.3	141.8	3	740.407	8.26	0.00611	36.2847	7.779e-05	6.552e-06	2.88
425	High	[K].LSSASTDVEK.[A]	1xTMTpro [K10]; 1xTMTpro [N-Term]	0.000133789	1	2	2	A0A6P6VNJ3	A0A6P6VNJ3 [174-183]	A0A6P6VNJ3; A0A6P6W595	0	1644.93	10	87.4	95.5	93	97.2	106.3	96.5	106.5	95.6	112.5	97.3	101.5	115.5	320.3	490	509	555.1	297.7	697.2	624.2	598.1	734.3	388	702	629.3	2	822.974	6.82	0.00561	22.9533	7.779e-05	6.928e-07	3.31
426	High	[K].ISQLVNTAPAIPR.[L]	1xTMTpro [N-Term]	0.000133789	1	1	2	A0A6P6ULX6	A0A6P6ULX6 [69-81]	A0A6P6ULX6	0	1684.01	13	92.9	112.7	105.8	84.4	64.4	99.3	107.5	108.3	107	81.6	142	111.5	214.9	364.7	365.1	304.2	113.7	452.7	397.7	427.5	440.6	205.3	619.8	383.3	2	842.515	8.59	0.00724	43.3252	7.779e-05	1.47e-06	3.71
427	High	[K].LTCEIGEK.[V]	1xCarbamidomethyl [C3]; 1xTMTpro [K8]; 1xTMTpro [N-Term]	0.000133789	1	1	3	A0A6P6T3Q6	A0A6P6T3Q6 [314-321]	A0A6P6T3Q6	0	1557.88	8	106.4	103.6	100.9	107.7	116.3	120.1	99.8	100.9	106.5	121.4	116.9	107.7	200.5	273.3	284	316.2	167.4	446.1	300.9	324.5	357.5	249	415.8	301.7	2	779.449	6.17	0.00481	30.5563	7.779e-05	0.0001862	2.47
428	High	[K].LSQLPGDMAIGHVR.[Y]	1xTMTpro [N-Term]	0.000133789	1	1	1	A0A6P6WBY0	A0A6P6WBY0 [142-155]	A0A6P6WBY0	0	1798	14	98	92.3	98.5	102	97.5	101.3	120.7	98.9	100.4	110.1	98.1	92.9	29.6	39	44.4	48	22.5	60.3	58.3	51	54	36.2	55.9	41.7	3	600.007	5.79	0.00347	37.0202	7.779e-05	3.303e-05	2.61
429	High	[R].ITDATILEK.[A]	1xTMTpro [K9]; 1xTMTpro [N-Term]	0.000133789	1	3	1	A0A6P6SG36	A0A6P6SG36 [111-119]	A0A6P6SG36; A0A6P6S8Y0; A0A6P6SA03	0	1611.98	9	84.6	93.9	103.9	104.3	129.5	121.2	104.6	105.6	119.9	153.3	149.1	136.7	92.6	143.7	169.7	177.8	108.2	261.3	183	197.1	233.7	182.5	307.9	222.3	2	806.502	9.06	0.0073	41.5494	7.779e-05	0.0003766	2.76
430	High	[K].LTDGTVFDSSFERGDPIEFELGSGQVIK.[G]	1xTMTpro [K28]; 1xTMTpro [N-Term]	0.000133789	1	1	1	A0A6P6UPX1	A0A6P6UPX1 [59-86]	A0A6P6UPX1	1	3651.9	28	104.4	98.6	90.4	93.7	107.4	109.9	78.1	82.6	92.3	104.6	87.7	66.1	144.3	190.7	186.4	201.6	113.4	299.2	172.6	194.8	227.1	157.3	228.7	135.7	4	913.742	11.21	0.01024	49.8003	7.779e-05	5.27e-07	5.2
431	High	[R].LTPYGVADFSPAVSPSGVWTAVASYGEK.[G]	1xTMTpro [K28]; 1xTMTpro [N-Term]	0.000133789	2	4	1	A0A6P6UWU1; A0A6P6UQ87	A0A6P6UWU1 [214-241]; A0A6P6UQ87 [214-241]	A0A6P6UWU1; A0A6P6UKE0; A0A6P6UQ87; A0A6P6UMX3	0	3464.82	28	72.8	89.1	86.8	82.3	121.3	92	97.7	96.3	94.6	163.7	164	152.7	42.8	73.3	76.2	75.4	54.5	106.7	91.9	96.7	99.1	104.8	182	133.5	4	866.971	11.36	0.00984	53.9426	7.779e-05	1.173e-06	4.38
432	High	[R].ITPSWVGFTDGER.[L]	1xTMTpro [N-Term]	0.000133789	1	2	2	A0A6P6W685	A0A6P6W685 [113-125]	A0A6P6W685; A0A6P6VNL7	0	1768.92	13	91	110.3	112	109.2	89.7	107.5	99.2	96.5	97.2	104.9	130.8	127.4	170.9	289.8	314	319.3	128.7	398	297.9	309.1	325.2	214.3	463.5	355.7	2	884.97	8.33	0.00736	44.7885	7.779e-05	0.0001529	3.47
433	High	[K].LTPGQVAELSK.[Q]	1xTMTpro [K11]; 1xTMTpro [N-Term]	0.000133789	1	2	1	A0A6P6UPY9	A0A6P6UPY9 [91-101]	A0A6P6UPY9; A0A6P6UPT7	0	1751.06	11	116.6	102.5	106.4	102.5	112.3	105.2	96.9	97.9	103.1	121.6	112.1	112.9	128.2	157.6	174.6	175.5	94.3	227.8	170.4	183.7	201.9	145.4	232.5	184.5	2	876.038	7.8	0.00683	38.9425	7.779e-05	1.874e-05	3.92
434	High	[K].LTPEEMAELESIASANAAK.[G]	1xTMTpro [K19]; 1xTMTpro [N-Term]	0.000133789	1	2	1	A0A6P6WXI8	A0A6P6WXI8 [301-319]	A0A6P6WXI8; A0A6P6WV12	0	2583.38	19	114.3	114	170.8	83.4	109	95.6	100.3	93.1	111.8	122.1	75.1	77.5	38.7	54	86.3	44	28.2	63.8	54.3	53.8	67.4	45	48	39	3	861.808	10.52	0.00906	50.0033	7.779e-05	4.19e-08	4.39
435	High	[R].LTPDYDALDVANK.[I]	1xTMTpro [K13]; 1xTMTpro [N-Term]	0.000133789	1	14	3	A0A6P6W7Q3	A0A6P6W7Q3 [137-149]	A0A6P6VE57; A0A6P6V007; A0A6P6WYN4; A0A6P6W520; A0A6P6W2B0; A0A6P6VDI8; A0A6P6UG26; A0A6P6W7Q3; A0A6P6SZY2; A0A6P6VF01; A0A6P6TGE2; A0A6P6SG67; A0A6P6WZ73; A0A6P6VNF9	0	2043.13	13	95.4	87.1	99.6	108.6	107.7	119.1	87.8	92	101.6	104.3	89.6	90.3	492.1	628.6	766.8	872.5	424	1210.5	724.3	809.1	932.9	585.3	872.1	692.2	2	1022.07	6.46	0.0066	43.1391	7.779e-05	6.528e-09	4.75
436	High	[K].ITLIDEDEGNQGGAGRR.[E]	1xTMTpro [N-Term]	0.000133789	1	1	1	A0A6P6X5G0	A0A6P6X5G0 [283-299]	A0A6P6X5G0	1	2105.09	17	119.9	105.1	117	85.9	70.6	80.4	78.6	82.1	82.9	55.6	62.9	55	134.7	165.2	196.2	150.3	60.6	178.1	141.2	157.3	165.9	68	133.4	91.8	3	702.371	3.94	0.00276	22.8943	7.779e-05	4.664e-05	3.55
437	High	[K].LTLESADGGK.[Q]	1xTMTpro [K10]; 1xTMTpro [N-Term]	0.000133789	2	2	2	A0A6P6X039; A0A6P6WK79	A0A6P6X039 [288-297]; A0A6P6WK79 [288-297]	A0A6P6X039; A0A6P6WK79	0	1598.92	10	81.2	74.9	92.9	106.2	97.1	106.5	105.6	108.5	114.2	118.9	108.4	117.1	194.6	251.1	332.2	396.3	177.7	502.5	404.6	443.5	487.2	309.9	489.6	417.1	2	799.971	6.93	0.00554	31.6279	7.779e-05	5.686e-06	3.44
438	High	[K].LTIEEATFR.[D]	1xTMTpro [N-Term]	0.000133789	1	2	1	A0A6P6TAH0	A0A6P6TAH0 [647-655]	A0A6P6TAH0; A0A6P6TKK7	0	1383.78	9	102.8	90.8	95.6	93.1	128.7	98.3	93.3	94.6	100	119.5	89.3	101.3	259.1	320.2	359.6	365.4	247.7	488.1	375.8	406.8	448.7	327.8	424.4	379.4	2	692.399	8.13	0.00563	38.4833	7.779e-05	0.000174	2.47
439	High	[K].ITIDPDDPAAVSQYAK.[V]	1xTMTpro [K16]; 1xTMTpro [N-Term]	0.000133789	1	1	2	A0A6P6TL34	A0A6P6TL34 [71-86]	A0A6P6TL34	0	2312.26	16	78.2	76.5	81.9	96.9	109.9	108.3	95.3	103.8	111.9	123.5	97.6	101.5	185.7	254.3	290.4	358.5	199.4	507.3	362.1	421	473.6	319.3	437.3	358.4	3	771.434	10.15	0.00782	43.3914	7.779e-05	3.693e-09	4.46
440	High	[K].LTLDDHK.[S]	1xTMTpro [K7]; 1xTMTpro [N-Term]	0.000133789	1	1	1	A0A6P6UQ53	A0A6P6UQ53 [431-437]	A0A6P6UQ53	0	1449.86	7	108.5	84.9	94	125.7	145.3	101.5	113.4	117.3	116.1	127.1	99.5	109.8	53.6	58.7	69.3	96.7	54.8	98.8	89.6	98.9	102.1	68.3	92.7	80.6	3	483.959	4.87	0.00236	21.8261	7.779e-05	0.0003058	3.24
441	High	[R].LTLADALVYACNQGVEK.[I]	1xCarbamidomethyl [C11]; 1xTMTpro [K17]; 1xTMTpro [N-Term]	0.000133789	1	3	1	A0A6P6SUS0	A0A6P6SUS0 [446-462]	A0A6P6SUS0; A0A6P6WUT6; A0A6P6WRG6	0	2473.36	17	90.2	102.9	94.3	105.5	81.8	104.9	99.7	98.5	101.3	137.1	113	118.2	46.3	73.9	72.3	84.4	32.1	106.2	81.9	86.3	92.6	76.6	109.5	90.2	3	825.134	10.34	0.00852	49.9843	7.779e-05	5.092e-10	4.69
442	High	[K].ITGYADAAQAPDLFTTAPALAIPK.[A]	1xTMTpro [K24]; 1xTMTpro [N-Term]	0.000133789	1	1	1	A0A6P6SED1	A0A6P6SED1 [288-311]	A0A6P6SED1	0	3024.69	24	110.1	93.6	97.3	88	80	97.6	74.9	82.4	82.1	95.8	91.4	86.1	161.8	192.3	213.4	201.3	89.7	282.4	175.9	206.5	214.7	153.1	253.2	188	3	1008.9	-2.07	-0.00209	51.5615	7.779e-05	8.206e-09	2.74
443	High	[K].LTGSIPDSFGR.[F]	1xTMTpro [N-Term]	0.000133789	2	3	4	A0A6P6SXP3; A0A6P6SMX9	A0A6P6SXP3 [182-192]; A0A6P6SMX9 [182-192]	A0A6P6T0U4; A0A6P6SXP3; A0A6P6SMX9	0	1453.8	11	126.7	156.8	143.1	74.8	51	87.7	80.4	82.3	79.1	49.7	72.4	61.9	333.1	576.5	561.5	306.3	102.3	454.2	338	369.2	370.4	142.1	359.2	241.7	2	727.406	5.65	0.00411	33.9449	7.779e-05	1.014e-05	2.42
444	High	[R].ITGFPVVDDDWK.[L]	1xTMTpro [K12]; 1xTMTpro [N-Term]	0.000133789	1	4	2	A0A6P6VSH8	A0A6P6VSH8 [113-124]	A0A6P6VSH8; A0A6P6VTR5; A0A6P6WBD5; A0A6P6WAP3	0	2000.1	12	77.3	78.6	80.6	81.7	102.8	90.1	106.1	108.3	113.2	130.5	108.3	107.9	146.7	208.8	228.3	241.5	149.1	337.2	322.1	350.8	382.8	269.7	388	304.6	3	667.376	8.01	0.00534	48.5213	7.779e-05	4.712e-05	2.66
445	High	[R].ITGDDWDTWGDVASHFDVSR.[D]	1xTMTpro [N-Term]	0.000133789	1	2	1	A0A6P6VE39	A0A6P6VE39 [274-293]	A0A6P6VE39; A0A6P6VB92	0	2583.21	20	98.2	137.4	117.6	128	97.5	111.7	108.2	105.1	117.1	106.6	113.9	107.2	26.5	51.9	47.4	53.8	20.1	59.4	46.7	48.4	56.3	31.3	58	43	3	861.745	5.44	0.00468	47.8606	7.779e-05	4.583e-10	6.06
446	High	[R].ITGADVPMPYAANLER.[M]	1xOxidation [M8]; 1xTMTpro [N-Term]	0.000133789	1	1	2	A0A6P6X5K0	A0A6P6X5K0 [327-342]	A0A6P6X5K0	0	2038.06	16	87.5	96.8	93.2	79.2	114.4	89	100.8	91.7	97.3	100.5	86.8	83.6	183.4	283.8	291.7	258.6	183.1	367.7	337.7	328.1	363.3	229.3	343.4	260.6	3	680.032	11.02	0.00749	38.0883	7.779e-05	1.814e-05	3.39
447	High	[K].ITFHNPGIQEDPACGPLLDAVAIK.[E]	1xCarbamidomethyl [C14]; 1xTMTpro [K24]; 1xTMTpro [N-Term]	0.000133789	2	2	5	A0A6P6VWJ2; A0A6P6WEC8	A0A6P6VWJ2 [171-194]; A0A6P6WEC8 [171-194]	A0A6P6VWJ2; A0A6P6WEC8	0	3184.73	24	66.4	69.9	69.2	96.8	142.8	104.5	100.9	109.3	106.7	179.7	110.4	128.8	259.2	381.8	403.2	588.6	425.7	804.2	629.8	728	741.6	763.2	813	747.5	3	1062.26	9.24	0.00981	47.225	7.779e-05	1.405e-17	7.51
448	High	[R].LTFEEGIQILK.[E]	1xTMTpro [K11]; 1xTMTpro [N-Term]	0.000133789	2	2	1	A0A6P6V368; A0A6P6VD87	A0A6P6V368 [387-397]; A0A6P6VD87 [387-397]	A0A6P6V368; A0A6P6VD87	0	1899.14	11	87.5	83.2	104.8	110.7	140.8	120.8	96.8	94.4	95.1	124.6	98.9	101.2	30.6	40.7	54.7	60.3	37.6	83.2	54.1	56.3	59.2	47.4	65.2	52.6	3	633.725	8.37	0.0053	49.6151	7.779e-05	0.0001949	3.14
449	High	[R].LTFDEPEPGITIVK.[L]	1xTMTpro [K14]; 1xTMTpro [N-Term]	0.000133789	2	2	1	A0A6P6STM4; A0A6P6ST82	A0A6P6STM4 [298-311]; A0A6P6ST82 [298-311]	A0A6P6STM4; A0A6P6ST82	0	2167.25	14	75.1	77.4	79.6	122.5	136	143.6	90.1	97.8	91	125.2	117.8	120.4	54.7	78.9	86.6	139	75.7	206.2	105	121.6	118.1	99.3	162	130.4	3	723.096	10.39	0.0075	47.4968	7.779e-05	6.736e-06	3.33
450	High	[R].LTEVSASDKLEQFR.[A]	1xTMTpro [K9]; 1xTMTpro [N-Term]	0.000133789	1	3	1	A0A6P6T7H6	A0A6P6T7H6 [385-398]	A0A6P6T871; A0A6P6T7H6; A0A6P6T7P8	1	2231.25	14	84.2	89.1	96.7	92	108.1	113.4	113.1	123.3	132.8	118.2	123.1	123.5	95.1	140.8	163	161.7	93.2	252.4	204.1	237.5	267	145.2	262.1	207.3	3	744.43	9.85	0.00733	39.5077	7.779e-05	4.185e-09	3.05
451	High	[K].ITEVAESVDNK.[A]	1xTMTpro [K11]; 1xTMTpro [N-Term]	0.000133789	1	1	1	A0A6P6U3E6	A0A6P6U3E6 [167-177]	A0A6P6U3E6	0	1813.02	11	106.9	110.8	122.1	97.9	110.9	100.4	112.5	106	112	110.1	108.9	111	137.4	199.2	234.2	195.9	108.8	254.3	231.1	232.5	256.3	154	264.1	212.1	3	605.017	8.69	0.00525	36.5704	7.779e-05	0.0003883	2.85
452	High	[K].LTENLTSNDFR.[K]	1xTMTpro [N-Term]	0.000133789	1	2	1	A0A6P6WX87	A0A6P6WX87 [221-231]	A0A6P6WX87; A0A6P6WV12	0	1613.85	11	86.9	101	96.1	97.5	105.4	110.3	111.1	125.5	120.1	100.5	137.7	119.8	71.4	116.2	117.9	124.8	66.2	178.7	146	176	175.8	89.9	213.5	146.4	2	807.435	10.12	0.00816	32.9255	7.779e-05	2.096e-05	2.15
453	High	[R].ITEGVNLPFR.[V]	1xTMTpro [N-Term]	0.000133789	1	1	1	A0A6P6U294	A0A6P6U294 [284-293]	A0A6P6U294	0	1449.84	10	107.6	136.9	126.1	96	62.3	116.6	122.6	116.5	118.2	71.6	124.1	102.6	107.4	191.2	188	149.3	47.5	229.4	195.7	198.5	210.1	77.8	233.8	152.3	2	725.429	7.79	0.00565	43.5446	7.779e-05	0.0002399	2.51
454	High	[K].ITEGPDEEDKPQITGK.[I]	2xTMTpro [K10; K16]; 1xTMTpro [N-Term]	0.000133789	2	3	1	A0A6P6SFQ9; A0A6P6S7R6	A0A6P6SFQ9 [362-377]; A0A6P6S7R6 [362-377]	A0A6P6SFQ9; A0A6P6S7R6; A0A6P6SHH8	0	2669.48	16	107.2	106.5	123.8	109.6	122.9	71.5	103.6	90.5	75.1	117.1	111.7	128.2	109	151.5	187.8	173.6	95.4	143.3	168.4	156.9	136	129.5	214.2	193.8	3	890.506	7.76	0.00691	28.3898	7.779e-05	1.583e-08	3.7
455	High	[R].ITEGMDVVK.[A]	1xTMTpro [K9]; 1xTMTpro [N-Term]	0.000133789	1	1	4	A0A6P6US60	A0A6P6US60 [139-147]	A0A6P6US60	0	1599.93	9	92.4	97.4	95.9	95.7	100.6	108.3	107.8	105.8	113.6	109.4	106.4	102.2	365.5	539.4	566.2	590	304.1	844.6	681.8	714.3	800.4	471.1	794.1	601.1	2	800.474	8.94	0.00715	34.4662	7.779e-05	3.835e-05	2.95
456	High	[K].LTEELASYESK.[V]	1xTMTpro [K11]; 1xTMTpro [N-Term]	0.000133789	1	1	1	A0A6P6S6Q8	A0A6P6S6Q8 [1051-1061]	A0A6P6S6Q8	0	1878.04	11	75.1	66.3	74.1	85.7	89.2	91.6	85.8	91.5	100.7	131.6	102	117.7	49.6	61.3	73.1	88.2	45	119.3	90.6	103.2	118.5	94.6	127.2	115.6	3	626.686	4.56	0.00285	41.5002	7.779e-05	4.65e-06	3.23
457	High	[K].LTEDDILHSIEER.[A]	1xTMTpro [N-Term]	0.000133789	1	2	1	A0A6P6V762	A0A6P6V762 [476-488]	A0A6P6V762; A0A6P6VCH7	0	1873.98	13	91.2	104.1	112.5	130.1	104.2	133.4	112.6	100.9	115.1	116.5	126.7	162.1	42.4	67.7	78	94.2	37	122.2	83.7	80	95.3	58.9	111.1	112	3	625.338	9.77	0.0061	43.4308	7.779e-05	1.937e-06	4.17
458	High	[K].LTDSFLDGTSSVYLEELQR.[A]	1xTMTpro [N-Term]	0.000133789	2	2	3	A0A6P6VND8; A0A6P6W6X1	A0A6P6VND8 [63-81]; A0A6P6W6X1 [63-81]	A0A6P6VND8; A0A6P6W6X1	0	2477.27	19	81.4	101.2	101.9	95.7	70	116.9	102.4	105.5	115.2	85.9	123.8	107.1	360.8	627	674.1	660	236.9	1020.4	725.5	797.3	909.1	414.2	1034.4	705.1	2	1239.15	7.27	0.009	50.3229	7.779e-05	3.584e-13	5.08
459	High	[R].LTDLSGVQVK.[V]	1xTMTpro [K10]; 1xTMTpro [N-Term]	0.000133789	1	1	2	A0A6P6V7I6	A0A6P6V7I6 [99-108]	A0A6P6V7I6	0	1668.02	10	87.2	110.4	126.4	91.3	126.3	53.6	104.2	66.1	61.5	86.2	133.3	139.4	169.9	300.7	367.3	276.9	187.9	205.6	324.5	219.6	213.2	182.7	489.7	403.4	3	556.682	6.86	0.00381	40.8189	7.779e-05	8.889e-06	3.06
460	High	[K].ITDEGFTISQPYSLK.[T]	1xTMTpro [K15]; 1xTMTpro [N-Term]	0.000133789	1	1	1	A0A6P6TPK5	A0A6P6TPK5 [215-229]	A0A6P6TPK5	0	2307.27	15	92.5	80.7	88	120.3	147.5	123.1	109.3	100.5	109.8	133.1	114.5	109.3	66.4	81.1	94.3	134.5	80.9	174.1	125.5	123.1	140.4	104	155.1	116.6	3	769.77	9.53	0.00733	45.5692	7.779e-05	1.282e-06	4.55
461	High	[R].IRGDAPDQLNVK.[Q]	1xTMTpro [K12]; 1xTMTpro [N-Term]	0.000133789	1	2	1	A0A6P6VY97	A0A6P6VY97 [494-505]	A0A6P6VY97; A0A6P6VYB7	1	1934.13	12	83.2	85.7	91.9	90.4	102.1	83.6	78.9	83.1	82.8	84.5	75.4	80.5	107.1	154.4	176.5	181.3	100.4	212.1	162.3	182.4	189.9	118.3	183.2	154.1	3	645.388	9.39	0.00605	22.6882	7.779e-05	6.7e-07	3.57
462	High	[K].LSQGPFSEVLR.[S]	1xTMTpro [N-Term]	0.000133789	1	1	1	A0A6P6WRR6	A0A6P6WRR6 [64-74]	A0A6P6WRR6	0	1536.87	11	102.3	111.5	104.2	94.2	91.7	107.4	116.9	118.2	113.4	87.5	136.6	103.6	90.7	138.3	137.9	130.1	62.1	187.7	165.7	178.8	179	84.4	228.4	136.5	2	768.946	9.39	0.00721	44.0031	7.779e-05	0.0003459	2.64
463	High	[K].ISQFDGGYK.[A]	1xTMTpro [K9]; 1xTMTpro [N-Term]	0.000133789	1	2	3	A0A6P6S7G9	A0A6P6S7G9 [108-116]	A0A6P6S7G9; A0A6P6SFR3	0	1622.9	9	107	105	109.4	94.3	105.1	112.6	84.7	84.9	96.9	84.9	84.2	76.5	521.5	716	795.8	715.8	391.3	1081.3	659.6	706.1	840.8	450.4	774.5	554.3	2	811.961	7.07	0.00573	32.5266	7.779e-05	2.837e-05	3.34
464	High	[K].LSELNATLEK.[A]	1xTMTpro [K10]; 1xTMTpro [N-Term]	0.000133789	1	1	2	A0A6P6S6Q8	A0A6P6S6Q8 [540-549]	A0A6P6S6Q8	0	1726.02	10	78	67.8	89.1	103	117.9	101.1	124.2	133.2	111.3	194.7	144.7	147.2	25.8	31.4	44	53.1	29.8	65.9	65.7	75.2	65.6	70.1	90.3	72.4	2	863.523	8.56	0.00738	42.3744	7.779e-05	9.519e-06	3.01
465	High	[R].LSELLGVEVK.[M]	1xTMTpro [K10]; 1xTMTpro [N-Term]	0.000133789	3	5	2	A0A6P6V940; A0A6P6SFZ7; A0A6P6V011	A0A6P6V940 [84-93]; A0A6P6SFZ7 [84-93]; A0A6P6V011 [84-93]	A0A6P6V940; A0A6P6SFZ7; A0A6P6SGW2; A0A6P6V011; A0A6P6S6L3	0	1695.05	10	102.8	91.6	99	126.7	132.8	143.7	123.1	115.9	126.9	100.6	118	108.9	84.1	104.9	120.9	161.5	83	231.8	161.1	161.9	185	89.6	182.1	132.5	2	848.037	7.1	0.00601	49.2141	7.779e-05	1.464e-06	4.46
466	High	[K].LSEGPFSEVLR.[S]	1xTMTpro [N-Term]	0.000133789	1	1	1	A0A6P6VAK0	A0A6P6VAK0 [64-74]	A0A6P6VAK0	0	1537.85	11	73	104.8	102.7	127.4	102.8	128	117	100.3	113.4	110.6	146	130.1	50.3	101	105.6	136.7	54.1	173.8	128.9	117.9	139.1	82.9	189.7	133.2	2	769.435	5.96	0.00459	44.8189	7.779e-05	1.893e-05	2.68
467	High	[K].ISEGLGLGTDK.[A]	1xTMTpro [K11]; 1xTMTpro [N-Term]	0.000133789	2	3	7	A0A6P6WVA0; A0A6P6X4N6	A0A6P6WVA0 [84-94]; A0A6P6X4N6 [93-103]	A0A6P6WVA0; A0A6P6X4N6; A0A6P6WPR8	0	1697.99	11	103.5	108.3	112.2	100.3	120.9	107.9	82.7	84.8	91.3	102.6	93.6	88.8	916.8	1341.4	1483.5	1383.2	818	1883.8	1170.5	1280.9	1440.2	988.4	1563.4	1168.6	2	849.508	8.8	0.00747	37.576	7.779e-05	1.683e-07	4.08
468	High	[R].LSEEWVVPLR.[S]	1xTMTpro [N-Term]	0.000133789	1	1	1	A0A6P6UZI7	A0A6P6UZI7 [381-390]	A0A6P6UZI7	0	1531.88	10	80.5	92.4	86	138	52.7	135.9	137.4	150.6	151.3	110.6	177.6	204.9	25.2	40.5	40.2	67.3	12.6	83.9	68.8	80.5	84.4	37.7	104.9	95.4	2	766.45	7.94	0.00608	46.5826	7.779e-05	9.404e-05	3.03
469	High	[R].LSEEEIGGLGQLFK.[M]	1xTMTpro [K14]; 1xTMTpro [N-Term]	0.000133789	1	2	1	A0A6P6UM90	A0A6P6UM90 [324-337]	A0A6P6UM90; A0A6P6UQL9	0	2128.21	14	45.1	67	69.6	95.4	94.9	94.2	135.5	137.1	115.4	185.3	173.9	196.3	10.2	21.2	23.5	33.6	16.4	42	49	52.9	46.5	45.6	74.2	66	3	710.083	9.45	0.0067	50.1494	7.779e-05	9.76e-08	3.09
470	High	[K].LSEALVAQR.[R]	1xTMTpro [N-Term]	0.000133789	1	2	1	A0A6P6SN38	A0A6P6SN38 [142-150]	A0A6P6SN38; A0A6P6TFU1	0	1290.77	9	84.7	108.1	107.8	90.8	68.2	96.6	90.7	89.2	93.8	59.7	84.4	77.3	148.4	265	281.9	247.8	91.2	333.4	254.1	266.8	292.7	113.9	279	201.4	2	645.892	4.73	0.00305	29.0382	7.779e-05	0.0002015	2.55
471	High	[R].LSEAAANAVK.[D]	1xTMTpro [K10]; 1xTMTpro [N-Term]	0.000133789	1	2	3	A0A6P6V2F8	A0A6P6V2F8 [41-50]	A0A6P6V2F8; A0A6P6V8R7	0	1581.95	10	83.7	93.1	89.6	116.4	135	130.7	101.1	104.9	114.9	89.7	90.5	85.2	307.8	479.1	491.9	666.8	379.1	947.3	594.5	658	752.5	358.8	627.5	465.9	3	527.99	7.03	0.00371	27.2693	7.779e-05	2.359e-06	2.58
472	High	[R].ISDSALVEAAILSDR.[Y]	1xTMTpro [N-Term]	0.000133789	1	1	1	A0A6P6T8I6	A0A6P6T8I6 [447-461]	A0A6P6T8I6	0	1864.03	15	95	92.6	102.4	111.7	98.3	115.6	101.4	109.8	95.1	110.5	134.5	130.9	14.3	19.5	23	26.2	11.3	34.3	24.4	28.2	25.5	18.1	38.2	29.3	3	622.02	6.5	0.00404	48.1084	7.779e-05	6.276e-08	4.64
473	High	[R].LSDQVAESVK.[H]	1xTMTpro [K10]; 1xTMTpro [N-Term]	0.000133789	1	1	1	A0A6P6V9W5	A0A6P6V9W5 [57-66]	A0A6P6V9W5	0	1683.98	10	126.5	101.2	130.5	108.9	121.1	129.3	78.9	88.2	99.6	99.1	79.6	77.2	97.5	109.2	150.1	130.7	71.3	196.5	97.2	116	136.7	83.1	115.7	88.5	3	562.001	7.25	0.00407	30.6151	7.779e-05	6.787e-06	3.41
474	High	[R].LSDIEADTDVQRPELLALQVEEAGQAISAASR.[L]	1xTMTpro [N-Term]	0.000133789	1	2	1	A0A6P6V2R3	A0A6P6V2R3 [636-667]	A0A6P6V2R3; A0A6P6VA90	0	3699.94	32	103.6	127.4	114	80.2	54.9	108.8	111.4	107.7	119.2	75.1	119.8	83.4	86.9	149.6	142.8	104.8	35.2	180	149.5	154.2	178.2	68.6	189.7	104	4	925.751	12.78	0.01182	52.0613	7.779e-05	0.0001205	3.02
475	High	[K].LSDFGVQGADAK.[N]	1xTMTpro [K12]; 1xTMTpro [N-Term]	0.000133789	1	1	2	A0A6P6SJ99	A0A6P6SJ99 [129-140]	A0A6P6SJ99	0	1816.01	12	95.1	88.5	97.7	115.1	120.8	112.5	115.6	106.6	109.4	124.3	127.7	117.2	243.6	317.2	373.8	459.3	236.4	567.8	473.6	465.9	499.1	346.4	617.4	446.4	2	908.515	6.69	0.00607	36.5293	7.779e-05	2.914e-09	4.92
476	High	[K].LSDEAIEETLEK.[V]	1xTMTpro [K12]; 1xTMTpro [N-Term]	0.000133789	1	2	2	A0A6P6X5F7	A0A6P6X5F7 [410-421]	A0A6P6X5F7; A0A6P6WR68	0	1985.09	12	94.5	74.7	87	108.7	152.7	118.8	95.4	97.3	97.1	166.9	106.6	116.3	67.1	74.2	92.2	120.2	82.8	166.2	108.3	117.9	122.7	128.9	142.8	122.7	3	662.375	8.85	0.00586	44.3541	7.779e-05	5.734e-05	3.6
477	High	[R].ISAVTSPTPSR.[VI]	1xTMTpro [N-Term]	0.000133789	1	4	1	A0A6P6TNN3	A0A6P6TNN3 [113-123]	A0A6P6TNN3; A0A6P6TFI5; A0A6P6TE63; A0A6P6TMG1	0	1419.81	11	91.7	116.1	112.1	89.1	70.4	91	92.6	96.4	93.8	63.2	95.9	77.5	150.1	265.9	273.8	227.1	88	293.5	242.4	269.1	273.3	112.5	296	188.4	2	710.416	9.12	0.00648	19.9864	7.779e-05	0.000303	3.23
478	High	[K].ISAVDLSLAPK.[L]	1xTMTpro [K11]; 1xTMTpro [N-Term]	0.000133789	2	2	2	A0A6P6W7S7; A0A6P6VPS2	A0A6P6W7S7 [150-160]; A0A6P6VPS2 [150-160]	A0A6P6W7S7; A0A6P6VPS2	0	1722.07	11	106.2	101.4	98.9	109.5	131.1	127.2	114.4	122.3	134.5	114.6	105.4	97.9	73.5	98.2	102.2	118	69.3	173.5	126.6	144.4	165.8	86.3	137.6	100.7	2	861.541	5.62	0.00484	45.4957	7.779e-05	2.277e-06	3.32
479	High	[K].ISAIKDIIPLLEK.[T]	2xTMTpro [K5; K13]; 1xTMTpro [N-Term]	0.000133789	2	3	2	A0A6P6VZV3; A0A6P6U5S5	A0A6P6VZV3 [273-285]; A0A6P6U5S5 [273-285]	A0A6P6VZV3; A0A6P6U5S5; A0A6P6VHD2	1	2365.53	13	75.4	69.2	76.1	133.2	162.3	149.9	92	99.9	103.1	134.6	121	96.6	140.2	180	211.2	385.7	230.5	549.4	273.6	316.8	341.4	272.4	424.6	267	3	789.185	7.13	0.00563	53.847	7.779e-05	5.087e-07	3.76
480	High	[K].LSAEEMAELESIASSIKGER.[Y]	1xTMTpro [K17]; 1xTMTpro [N-Term]	0.000133789	1	1	2	A0A6P6WU80	A0A6P6WU80 [302-321]	A0A6P6WU80	1	2758.48	20	100.9	85.2	115.8	115.1	117.8	135.7	84	93.6	119.5	128.6	109.4	66.2	215.4	254.6	369.2	382.8	192.1	571.1	286.9	340.9	454.5	298.8	440.7	210.2	3	920.171	6.8	0.00625	51.7015	7.779e-05	1.035e-19	8.12
481	High	[K].LSAEEMAELESIASAIKGER.[Y]	1xOxidation [M6]; 1xTMTpro [K17]; 1xTMTpro [N-Term]	0.000133789	1	4	2	A0A6P6WU84	A0A6P6WU84 [302-321]	A0A6P6WU84; A0A6P6WNT4; A0A6P6WNY8; A0A6P6X3M0	1	2758.48	20	104.6	93.7	108.5	94	85	106	86	88.9	101.6	90.7	91.9	67.5	376.5	471.8	582.6	526.8	233.5	751.6	494.8	545.7	651	355	623.7	361	3	920.172	8.46	0.00778	50.9959	7.779e-05	4.08e-13	6.09
482	High	[K].LSAEEMAELESIASAIK.[G]	1xOxidation [M6]; 1xTMTpro [K17]; 1xTMTpro [N-Term]	0.000133789	1	4	2	A0A6P6WU84	A0A6P6WU84 [302-318]	A0A6P6WU84; A0A6P6WNT4; A0A6P6WNY8; A0A6P6X3M0	0	2416.31	17	95.3	91.9	111	83.3	120.2	101.1	76.7	78.3	88.7	111.3	79.2	96.5	199	268.5	346.2	270.9	191.7	416.3	256	278.9	330	252.9	312.2	299.7	3	806.117	9.89	0.00797	52.1014	7.779e-05	1.842e-08	4.76
483	High	[K].LSAEEMAELESFASAGVK.[G]	1xTMTpro [K18]; 1xTMTpro [N-Term]	0.000133789	1	1	1	A0A6P6WTZ6	A0A6P6WTZ6 [304-321]	A0A6P6WTZ6	0	2477.31	18																									4	620.087	7.42	0.0046	51.7506	7.779e-05	2.493e-07	3.55
484	High	[K].LSAEDKAELESIASAIKGER.[Y]	2xTMTpro [K6; K17]; 1xTMTpro [N-Term]	0.000133789	1	1	1	A0A6P6WP81	A0A6P6WP81 [302-321]	A0A6P6WP81	2	3029.73	20	43.7	44	46.6	60.5	65.8	69.7	127.5	121.8	191.6	354.5	215.8	107.7	47	66.1	74.8	101.2	54	147.6	219	223.3	366.7	414.5	437.5	172	4	758.195	9.51	0.0072	48.0311	7.779e-05	2.478e-10	4.86
485	High	[K].LSAEDKAELESIASAIK.[G]	2xTMTpro [K6; K17]; 1xTMTpro [N-Term]	0.000133789	1	1	1	A0A6P6WP81	A0A6P6WP81 [302-318]	A0A6P6WP81	1	2687.56	17	36.5	33.6	38.2	49.4	59.9	52.5	97.8	99	126.4	281.2	188.7	307.6	109.3	140.5	170.5	230.2	136.8	309.5	467.9	505.4	673.3	915.5	1065.1	1368.2	3	896.535	9.68	0.00867	48.6641	7.779e-05	1.407e-12	5.96
486	High	[K].ISAAVNLAEESK.[I]	1xTMTpro [K12]; 1xTMTpro [N-Term]	0.000133789	1	1	1	A0A6P6TD99	A0A6P6TD99 [189-200]	A0A6P6TD99	0	1840.07	12	114.8	103.3	111.8	83.8	141.6	82.9	98.2	88	103.1	130.7	97.7	97.6	63.8	80.3	92.7	72.5	60.1	90.8	87.2	83.4	102	79	102.4	80.6	3	614.033	8.74	0.00536	41.7986	7.779e-05	0.0004062	2.7
487	High	[R].ISAANPEGTR.[W]	1xTMTpro [N-Term]	0.000133789	1	2	1	A0A6P6UVD5	A0A6P6UVD5 [58-67]	A0A6P6UVD5; A0A6P6UQK0	0	1319.72	10	92.3	112.8	104.4	92	56.5	103.4	115.3	112.7	107.9	59	112.9	87.8	212	362.7	358	329.1	99.2	468.1	423.6	441.6	441.3	147.4	489.1	299.9	2	660.365	-1.6	-0.00106	14.7422	7.779e-05	0.0001288	2.95
488	High	[K].LSAAISNILETK.[L]	1xTMTpro [K12]; 1xTMTpro [N-Term]	0.000133789	1	2	4	A0A6P6SUA7	A0A6P6SUA7 [77-88]	A0A6P6SQ38; A0A6P6SUA7	0	1868.13	12	67	72.7	66.9	117.4	120.2	119.9	121.5	120.4	122.9	163.8	162.1	149.1	194	294.8	289.1	529.7	265.8	684.4	562.5	595.1	633.8	516.2	885.8	641.9	2	934.58	9.92	0.00927	50.632	7.779e-05	6.174e-09	5.1
489	High	[K].LRVEDALNATK.[A]	1xTMTpro [K11]; 1xTMTpro [N-Term]	0.000133789	2	3	1	A0A6P6T372; A0A6P6XDA4	A0A6P6T372 [457-467]; A0A6P6XDA4 [457-467]	A0A6P6T372; A0A6P6XDA4; A0A6P6XBB8	1	1838.1	11	59.9	57.5	67.4	134.1	147.3	146.3	87.8	97.3	101.1	151.5	123.8	138	51.1	68.6	85.8	178	95.9	245.7	119.6	141.5	153.5	140.5	199	174.8	3	613.377	9.85	0.00604	32.1576	7.779e-05	6.746e-05	4.16
490	High	[R].LRSDFEFGHVLDAK.[L]	1xTMTpro [K14]; 1xTMTpro [N-Term]	0.000133789	1	1	1	A0A6P6UK46	A0A6P6UK46 [193-206]	A0A6P6UK46	1	2242.25	14	122.3	58.1	74.9	110	284.6	94.3	66.8	60.1	80.1	195.9	68.4	53.6	60.2	40	55	84.3	107	91.5	52.6	50.5	70.2	104.9	63.5	39.2	4	561.321	5.83	0.00327	41.1865	7.779e-05	0.0003383	3.53
491	High	[K].IRQDYDASGEAK.[A]	1xTMTpro [K12]; 1xTMTpro [N-Term]	0.000133789	1	1	1	A0A6P6SGF0	A0A6P6SGF0 [183-194]	A0A6P6SGF0	1	1961.06	12	104.8	103.6	96.5	89.1	99.8	107.7	110.8	111.7	118.2	109.3	100.1	91.8	118.6	164	163	157	86.3	240.2	200.5	215.6	238.3	134.6	213.8	154.5	3	654.359	2.65	0.00173	15.6932	7.779e-05	7.703e-08	3.68
492	High	[R].IRPAVQDDGGDIEYR.[G]	1xTMTpro [N-Term]	0.000133789	1	4	1	A0A6P6VQ43	A0A6P6VQ43 [197-211]	A0A6P6VQ43; A0A6P6W7U4; A0A6P6W8J2; A0A6P6WB62	0	2008.04	15	96.4	114.1	100.9	112.6	67	126.7	123.1	134.6	129.4	66.4	127.7	99.8	65.8	108.9	102.8	119.7	34.9	170.4	134.3	156.7	157.3	49.3	164.4	101.2	3	670.024	8	0.00536	22.0719	7.779e-05	2.743e-06	3.92
493	High	[K].LSELVGVTLGPK.[G]	1xTMTpro [K12]; 1xTMTpro [N-Term]	0.000133789	1	1	1	A0A6P6T372	A0A6P6T372 [87-98]	A0A6P6T372	0	1821.13	12	47.7	52.6	61.5	141.4	171.9	144.6	87.6	93.2	103.3	189.4	144.2	173.5	16.2	25	31.2	74.8	44.6	96.8	47.6	54	62.5	70	92.4	87.6	3	607.72	6.98	0.00424	49.2937	7.779e-05	1.956e-06	3.23
494	High	[K].ISQGIEAGVNPR.[M]	1xTMTpro [N-Term]	0.000133789	1	4	1	A0A6P6TVA2	A0A6P6TVA2 [180-191]	A0A6P6TVA2; A0A6P6TP39; A0A6P6TKT7; A0A6P6TKU4	0	1544.87	12	145.4	127.6	138.8	104.4	102.3	100.3	89.1	103.9	93.1	90	85.7	82.2	99.9	122.7	142.4	111.7	53.7	135.8	97.9	121.8	114	67.3	111.1	84	3	515.632	5.72	0.00295	24.8093	7.779e-05	0.0001664	3.21
495	High	[K].LSENIGLPQEADVFNPR.[A]		0.000133789	1	1	31	A0A6P6WMC4	A0A6P6WMC4 [312-328]	A0A6P6WMC4	0	1898.96	17																									2	949.99	6.72	0.00638	48.9856	7.779e-05	1.695e-08	3.63
496	High	[K].LSESAVDFPR.[V]	1xTMTpro [N-Term]	0.000133789	1	2	1	A0A6P6WF48	A0A6P6WF48 [401-410]	A0A6P6VWG7; A0A6P6WF48	0	1424.77	10	121.3	140.4	135.5	89.1	31.9	110.6	117.6	120.9	134.3	48.6	109.8	92.9	49.3	79.8	82.2	56.4	9.9	88.6	76.4	83.8	97.2	21.5	84.2	56.1	2	712.895	8.38	0.00597	34.0992	7.779e-05	0.0001556	2.09
497	High	[R].ISQEVSGDALGDEFK.[G]	1xTMTpro [K15]; 1xTMTpro [N-Term]	0.000133789	1	2	2	A0A6P6T9N3	A0A6P6T9N3 [32-46]	A0A6P6T9N3; A0A6P6TJY2	0	2203.17	15	75.5	81.9	80.6	113.2	97.9	128.5	94	101	97.6	94	97.1	113.3	210.2	318.9	334.9	490.5	208.1	704.6	418.3	479.7	483.9	284.7	509.8	468.9	2	1102.1	7.9	0.00871	42.5997	7.779e-05	2.33e-11	5.02
498	High	[K].LSPQTPIYSVVEGSEPPFFTR.[F]	1xTMTpro [N-Term]	0.000133789	1	2	1	A0A6P6SL99	A0A6P6SL99 [694-714]	A0A6P6SW23; A0A6P6SL99	0	2655.4	21	115.4	106.9	111.2	94.6	97.9	98.4	103.5	126.7	125.7	98.5	104.4	100.9	25.3	32.8	36.4	32.3	16.4	42.5	36.3	47.4	49.1	23.5	43.2	32.9	3	885.813	10.15	0.00898	50.963	7.779e-05	7.681e-11	4.45
499	High	[K].LSPPNPDDLGYVDSISVEEIGGVR.[V]	1xTMTpro [N-Term]	0.000133789	1	1	1	A0A6P6SZ39	A0A6P6SZ39 [339-362]	A0A6P6SZ39	0	2832.46	24	63.8	77.9	72.6	71.8	73.1	87.1	80.1	86.4	77.7	77.8	85	79.4	34.3	58.6	58.2	60.1	30	92.2	68.8	79.2	74.4	45.5	86.2	63.4	3	944.832	8.02	0.00757	48.9713	7.779e-05	8.193e-09	5.43
500	High	[R].LSPESEEQVR.[Y]	1xTMTpro [N-Term]	0.000133789	1	2	1	A0A6P6SQ72	A0A6P6SQ72 [785-794]	A0A6P6SQ72; A0A6P6SQ88	0	1477.78	10	81.6	90.3	78.1	106.9	57.3	94.2	109.7	104.9	92.9	84	108.2	159	134	207.4	191.5	273.3	71.8	304.9	288.1	293.8	271.5	150	335.1	388	2	739.4	7.04	0.0052	17.398	7.779e-05	0.0001392	3.1
501	High	[R].ISPDPIFLTSEATSVGGFYAINR.[R]	1xTMTpro [N-Term]	0.000133789	1	1	1	A0A6P6W6X9	A0A6P6W6X9 [311-333]	A0A6P6W6X9	0	2759.46	23	78.2	82.9	98.8	92.7	86.8	101.8	93.7	89.3	100.4	119	113.2	105.9	62.7	92.9	118.2	115.7	53.1	160.7	120	122.1	143.3	103.8	171.1	126.2	3	920.5	10.32	0.0095	52.2707	7.779e-05	0.0002988	4.36
502	High	[K].LSNVLHANELAR.[R]	1xTMTpro [N-Term]	0.000133789	1	8	1	A0A6P6W843	A0A6P6W843 [203-214]	A0A6P6VL70; A0A6P6VP84; A0A6P6W843; A0A6P6VM18; A0A6P6VL36; A0A6P6W6W7; A0A6P6W4F8; A0A6P6W5L6	0	1640.94	12																									3	547.655	6.11	0.00334	32.1591	7.779e-05	0.0001223	2.37
503	High	[K].ISMSEEDLLNAPGETYSVSLTEK.[G]	1xOxidation [M3]; 1xTMTpro [K23]; 1xTMTpro [N-Term]	0.000133789	1	1	1	A0A6P6ULL6	A0A6P6ULL6 [123-145]	A0A6P6ULL6	0	3137.61	23	99.4	91.3	97.2	58.7	87.3	65.2	64.9	65.3	75.6	108.6	74.4	67.4	161.6	207.8	236	148.6	108.4	209	168.7	181.1	219	192.1	228.4	162.9	3	1046.55	6.19	0.00648	45.6183	7.779e-05	2.758e-08	5.34
504	High	[K].ISMSEEDLLNAPGETYSVSLTEK.[G]	1xTMTpro [K23]; 1xTMTpro [N-Term]	0.000133789	1	1	3	A0A6P6ULL6	A0A6P6ULL6 [123-145]	A0A6P6ULL6	0	3121.61	23	130.5	114.2	136.3	63.4	103.6	67.8	60.2	58.2	62.5	135.2	88.8	85.1	466.1	570.7	726.7	352.8	282.5	477.1	343.5	354.6	397.5	525.5	598.5	451.6	3	1041.22	8.43	0.00877	48.8754	7.779e-05	9.293e-11	5.09
505	High	[R].ISLSFGDAYGNQVYAPR.[L]	1xTMTpro [N-Term]	0.000133789	1	2	2	A0A6P6X926	A0A6P6X926 [70-86]	A0A6P6X926; A0A6P6XGB0	0	2162.12	17	89.2	120.8	118.2	86.6	64.6	99.9	91.2	98.7	101.7	87.8	100.9	87.3	222.6	422	440.3	336.8	123.1	491.6	364.2	420.3	452.2	238.6	475.2	323.8	2	1081.57	8.6	0.00929	45.2069	7.779e-05	6.344e-10	4.77
506	High	[K].LSIGAITELK.[G]	1xTMTpro [K10]; 1xTMTpro [N-Term]	0.000133789	1	1	2	A0A6P6T5U0	A0A6P6T5U0 [92-101]	A0A6P6T5U0	0	1653.04	10	91.9	112.6	104.1	94	99.2	86.6	111	106	90.4	126.3	113.8	104.3	82.6	141.6	139.7	131.6	68.1	153.4	159.6	162.6	144.8	123.5	193	139.4	2	827.033	8.35	0.0069	47.8077	7.779e-05	3.39e-05	2.47
507	High	[R].LSLAEVLDISENSTK.[V]	1xTMTpro [K15]; 1xTMTpro [N-Term]	0.000133789	1	4	1	A0A6P6T2H0	A0A6P6T2H0 [403-417]	A0A6P6T2H0; A0A6P6T1K5; A0A6P6T2R6; A0A6P6T1K6	0	2227.27	15	74.5	87.1	77.4	113.7	118.8	134.8	112.5	103.3	104.4	130.3	109.4	96.3	27	44.2	41.9	64.2	32.9	96.3	65.2	63.9	67.4	51.4	74.8	51.9	3	743.099	6.21	0.00461	51.6115	7.779e-05	8.529e-06	3.82
508	High	[K].ISLAESSIEER.[T]	1xTMTpro [N-Term]	0.000133789	1	4	1	A0A6P6SRD9	A0A6P6SRD9 [53-63]	A0A6P6SRD9; A0A6P6SR37; A0A6P6T1U1; A0A6P6T1U0	0	1537.84	11	138	123.8	141.8	126	81.5	120.7	127.2	145.3	119.3	78.2	96	99.3	53.2	66.8	81.6	75.7	24	91.7	78.4	95.6	81.9	32.8	69.8	56.9	2	769.428	6.2	0.00477	32.7429	7.779e-05	1.197e-06	2.63
509	High	[R].ISHDVVQLLLR.[H]	1xTMTpro [N-Term]	0.000133789	1	1	1	A0A6P6U9L5	A0A6P6U9L5 [93-103]	A0A6P6U9L5	0	1596.98	11	80.3	91.5	87.8	108.2	56.8	98.4	105.5	105.7	86.6	114.1	188.8	187.2	32.6	52	53.2	68.4	17.6	78.7	68.5	73.2	62.6	50.4	144.6	113	3	533.001	7.75	0.00412	46.7412	7.779e-05	4.961e-07	3.41
510	High	[R].LSGTGSEGATIR.[V]	1xTMTpro [N-Term]	0.000133789	1	1	1	A0A6P6V9T2	A0A6P6V9T2 [525-536]	A0A6P6V9T2	0	1452.8	12	89.2	129.9	116.2	106.5	26.6	107.3	117.8	131.7	123.7	60.5	184.5	115.9	32.1	65.4	62.4	59.7	7.3	76.1	67.8	80.9	79.3	23.7	125.3	62	2	726.908	7.93	0.00576	17.6077	7.779e-05	5.416e-06	2.31
511	High	[K].ISGTAQATKEETSETAQAAK.[E]	2xTMTpro [K9; K20]; 1xTMTpro [N-Term]	0.000133789	1	1	3	A0A6P6X7Z0	A0A6P6X7Z0 [69-88]	A0A6P6X7Z0	1	2934.62	20	107.8	123.2	107.8	93.9	118.2	106.6	90.2	91.9	99.9	82.9	79.6	69.2	333.9	534	498.7	453.2	279.7	650.7	446.6	486	551	279.3	465.1	318.7	3	978.883	4.54	0.00444	25.5606	7.779e-05	5.571e-15	6.73
512	High	[K].ISGTAQATKEETSETAQAAK.[E]	2xTMTpro [K9; K20]	0.000133789	1	1	2	A0A6P6X7Z0	A0A6P6X7Z0 [69-88]	A0A6P6X7Z0	1	2630.41	20	144.9	91.5	92.1	106.9	208.7	92.4	86.2	85.1	79.5	135.2	69.7	85.8	205.7	181.7	195.2	236.3	226.3	258.4	195.6	206.2	201.1	208.9	186.6	181	3	877.481	6.36	0.00558	16.0248	7.779e-05	1.259e-08	4.97
513	High	[K].ISGTAQATK.[E]	1xTMTpro [K9]; 1xTMTpro [N-Term]	0.000133789	2	2	8	A0A6P6X7Z0; A0A6P6XCI4	A0A6P6X7Z0 [69-77]; A0A6P6XCI4 [99-107]	A0A6P6X7Z0; A0A6P6XCI4	0	1484.89	9	124.7	139.9	96.7	110.6	78	76.4	106.4	104.1	71.9	62	91	133.8	695.3	1091.3	804.3	960.2	331.9	839.2	948	990.4	713.3	375.8	957.4	1108.7	2	742.954	5.96	0.00442	17.0764	7.779e-05	4.678e-05	3.32
514	High	[R].ISGNVLAGDKDSLSFGR.[T]	1xTMTpro [K10]; 1xTMTpro [N-Term]	0.000133789	3	5	1	A0A6P6WKI5; A0A6P6WKF8; A0A6P6WW85	A0A6P6WKI5 [255-271]; A0A6P6WKF8 [255-271]; A0A6P6WW85 [255-271]	A0A6P6WKI5; A0A6P6WKF8; A0A6P6WW85; A0A6P6WYI1; A0A6P6X4J7	1	2344.31	17	95.9	114.9	117.7	117.4	152.8	139.7	121.4	117	114.2	75.1	92.5	65.2	54.5	91.3	99.8	103.9	66.3	156.4	110.3	113.4	115.5	46.4	99.1	55.1	3	782.116	8.8	0.00687	40.959	7.779e-05	2.259e-08	4.66
515	High	[R].ISGISGEGCGVTIEGFAAATEEAVVTPPAADTK.[A]	1xCarbamidomethyl [C9]; 1xTMTpro [K33]; 1xTMTpro [N-Term]	0.000133789	1	1	1	A0A6P6XH13	A0A6P6XH13 [67-99]	A0A6P6XH13	0	3813.97	33	109.2	106.5	107.3	98.4	134.3	104.1	94.5	90.5	103	120.7	97.1	83.8	73.9	100.8	108.4	103.7	69.4	138.8	102.2	104.5	124.1	88.9	123.9	84.3	4	954.256	8.61	0.00821	51.0041	7.779e-05	2.367e-10	5.33
516	High	[R].ISGISGEGCGVTIEGFAAATEEAVATPAAADTK.[A]	1xCarbamidomethyl [C9]; 1xTMTpro [K33]; 1xTMTpro [N-Term]	0.000133789	1	1	1	A0A6P6X7C7	A0A6P6X7C7 [67-99]	A0A6P6X7C7	0	3759.92	33	105.9	114.5	123.9	83.3	134.4	117.9	80.3	83.1	94.6	125.3	104.2	96.5	44.9	67.9	78.4	55	43.5	98.5	54.4	60.1	71.4	57.8	83.3	60.8	4	940.745	9.15	0.0086	50.5724	7.779e-05	5.861e-11	5.16
517	High	[R].ISGLIYEETR.[G]	1xTMTpro [N-Term]	0.000133789	1	1	2	A0A6P6W732	A0A6P6W732 [47-56]	A0A6P6W732	0	1484.83	10	132.8	188	193.7	98.5	42.5	105	98.4	109.4	100.2	41.4	107	90.9	123.3	244.1	268.3	142.4	30.1	192	146	173.3	165.7	41.8	187.3	125.4	2	742.923	7.78	0.00578	41.3008	7.779e-05	1.233e-05	2.81
518	High	[K].LSGGVAVIQVGAQTETELKEK.[K]	2xTMTpro [K19; K21]; 1xTMTpro [N-Term]	0.000133789	2	3	1	A0A6P6T372; A0A6P6XDA4	A0A6P6T372 [435-455]; A0A6P6XDA4 [435-455]	A0A6P6T372; A0A6P6XDA4; A0A6P6XBB8	1	3069.8	21	76.1	73	86.6	132.1	172.1	133.4	93.7	93.3	90.9	172.1	99.7	94.9	33.5	45	56.9	90.6	57.9	115.8	66	70.1	71.3	82.5	82.8	62.1	4	768.212	8.81	0.00676	45.1483	7.779e-05	9.518e-11	3.92
519	High	[K].LSGGVAVLK.[I]	1xTMTpro [K9]; 1xTMTpro [N-Term]	0.000133789	1	2	3	A0A6P6WUB2	A0A6P6WUB2 [403-411]	A0A6P6WUB2; A0A6P6WT68	0	1451.94	9	76.9	95.9	89.6	112.2	117.9	123.2	100.8	104.1	104.7	105.4	119.9	106.8	250.1	436.7	435	568.8	293	789.9	524.6	578.1	606.8	373.2	736	516.5	2	726.481	7.58	0.0055	37.6429	7.779e-05	9.781e-06	2.66
520	High	[R].LSGGDLTEAIK.[N]	1xTMTpro [K11]; 1xTMTpro [N-Term]	0.000133789	1	1	1	A0A6P6WLM4	A0A6P6WLM4 [119-129]	A0A6P6WLM4	0	1712.01	11	88.5	105.2	103.9	100.2	94.4	118.3	112.3	112.6	110.6	93.9	115.2	103.7	77.6	129.1	136	136.8	63.2	204.4	157.5	168.4	172.8	89.6	190.5	135.2	3	571.345	6.57	0.00375	40.8258	7.779e-05	0.000132	3.23
521	High	[K].LSFYSQPDGPIIGDSSFK.[S]	1xTMTpro [K18]; 1xTMTpro [N-Term]	0.000133789	1	4	1	A0A6P6VLB5	A0A6P6VLB5 [1015-1032]	A0A6P6VLB5; A0A6P6W704; A0A6P6W5Q7; A0A6P6VL78	0	2566.37	18	80.2	107.7	106.1	105.7	121.4	113.4	103.3	100.5	99.1	119.9	100.8	94.7	59.2	111.2	116.9	121.5	68.4	164.9	121.9	126.5	130.2	96.3	140.3	103.9	3	856.136	9.93	0.00849	47.6508	7.779e-05	1.408e-05	4.36
522	High	[K].LSFNDIDEVILVGGSTR.[I]	1xTMTpro [N-Term]	0.000133789	1	2	2	A0A6P6UKC7	A0A6P6UKC7 [384-400]	A0A6P6UKC7; A0A6P6URF6	0	2139.16	17	73.1	76.4	84.4	148.3	52.9	179.7	131.1	132.7	130.3	80.5	150.7	136.6	87.9	128.6	151.5	277.9	48.6	426	252.1	272.4	279.2	105.4	342	244.2	2	1070.1	12.21	0.01306	51.2054	7.779e-05	3.116e-12	5.11
523	High	[K].ISFGFEASK.[T]	1xTMTpro [K9]; 1xTMTpro [N-Term]	0.000133789	1	2	2	A0A6P6UMW7	A0A6P6UMW7 [282-290]	A0A6P6UMW7; A0A6P6UV97	0	1593.91	9	86.7	101.6	97.6	92.7	103.8	101.3	100.3	92.5	92.6	92.4	94.5	97.2	223.8	367.2	376.1	372.8	204.7	515.5	414.3	407.5	425.9	259.5	460.6	373.2	2	797.468	9.14	0.00728	44.0224	7.779e-05	0.0001135	2.96
524	High	[K].ISEYVAQLR.[R]	1xTMTpro [N-Term]	0.000133789	1	1	1	A0A6P6VMP8	A0A6P6VMP8 [234-242]	A0A6P6VMP8	0	1382.8	9	86.5	122.6	121.8	112.3	55.4	111.4	115	110.3	112	79.4	173.1	148.7	58.1	115.2	122.1	117.5	28.4	147.4	123.5	126.4	133.9	58	219.3	148.4	2	691.907	7.17	0.00496	40.8507	7.779e-05	4.773e-05	3.1
525	High	[K].ISEYQIIEISENVCNLK.[K]	1xCarbamidomethyl [C14]; 1xTMTpro [K17]; 1xTMTpro [N-Term]	0.000133789	1	2	1	A0A6P6SU50	A0A6P6SU50 [74-90]	A0A6P6SU50; A0A6P6SK11	0	2660.45	17	117.7	112.3	94.3	100	136.8	103.1	108.3	105	104.3	103.4	95.8	97.3	97.5	130.2	116.6	129.1	86.6	168.3	143.5	148.4	154	93.2	149.7	119.9	3	887.493	7.44	0.00659	51.2377	7.779e-05	2.704e-07	3.8
526	High	[K].LSENIGLPQEADVFNPR.[A]	1xTMTpro [N-Term]	0.000133789	1	1	194	A0A6P6WMC4	A0A6P6WMC4 [312-328]	A0A6P6WMC4	0	2203.17	17	108.7	134.9	120.4	75.1	58.6	91.3	115.4	112.2	112.5	65.5	97.8	75.3	11687.1	20299.6	19323.6	12580.1	4810.8	19356.2	19850.2	20598.5	21546.7	7664.9	19835.4	12035.4	2	1102.09	4.19	0.00462	45.0581	7.779e-05	4.623e-13	4.84
527	High	[R].NADKMNFAEIEK.[E]	2xTMTpro [K4; K12]; 1xTMTpro [N-Term]	0.000133789	1	3	1	A0A6P6S6C7	A0A6P6S6C7 [351-362]	A0A6P6S6C7; A0A6P6SEP2; A0A6P6S831	1	2322.29	12	82.6	84.9	91.3	76.1	130.6	94.3	80.9	82.4	97	146.3	94.3	83.7	176.3	253.5	290.7	252.8	212.9	396.6	276.1	300.1	368.6	339.7	379.7	265.5	3	774.774	6.24	0.00483	35.9716	7.779e-05	6.342e-06	2.69
528	High	[K].NAESLGVPYPK.[N]	1xTMTpro [K11]; 1xTMTpro [N-Term]	0.000133789	1	2	1	A0A6P6TQX7	A0A6P6TQX7 [165-175]	A0A6P6TQX7; A0A6P6WUT2	0	1783.02	11	96.6	97.4	97.5	88.6	115.1	98.7	94.5	99.1	86.6	85.5	76.5	69.3	138.5	195.5	208.8	198	126.1	279	216.7	242.4	221.2	133.5	206.9	147.7	2	892.022	6.73	0.006	34.9253	7.779e-05	0.0001887	2.66
529	High	[R].NAESWLLTTYLDDELR.[I]	1xTMTpro [N-Term]	0.000133789	2	2	4	A0A6P6U5G9; A0A6P6UIS2	A0A6P6U5G9 [283-298]; A0A6P6UIS2 [283-298]	A0A6P6U5G9; A0A6P6UIS2	0	2243.15	16	84.3	120.6	103.5	85.9	52.5	107.2	117.9	110.5	118.1	62.4	135.9	96	592.2	1186.4	1086.2	940.9	281.7	1484.5	1325.1	1325.3	1478.3	477	1802.4	1003.3	2	1122.09	6.71	0.00753	52.6933	7.779e-05	7.281e-14	3.94
530	High	[K].QEVMIGYSDSGK.[D]	1xOxidation [M4]; 1xTMTpro [K12]; 1xTMTpro [N-Term]	0.000133789	3	4	2	A0A6P6S900; A0A6P6S7R4; A0A6P6SHP8	A0A6P6S900 [589-600]; A0A6P6S7R4 [590-601]; A0A6P6SHP8 [590-601]	A0A6P6SC07; A0A6P6S900; A0A6P6S7R4; A0A6P6SHP8	0	1938.01	12	57.7	54.1	46.3	53.6	76.6	60.4	70.6	63	63.7	64.5	64.9	75.8	51	66.9	61.1	73.8	51.7	105.1	99.7	94.9	100.3	62	108.2	99.5	3	646.679	4.88	0.00315	25.129	7.779e-05	0.0001137	3.77
531	High	[K].QESVEATAEVSK.[T]	1xTMTpro [K12]; 1xTMTpro [N-Term]	0.000133789	1	2	2	A0A6P6S789	A0A6P6S789 [579-590]	A0A6P6SB82; A0A6P6S789	0	1886.04	12	92.3	98.9	87.1	102.4	104.1	85.1	101.8	94.1	94.7	87.6	89.5	98.7	238.7	357.9	336.3	412.4	205.6	433.6	420.9	415	436.2	246.4	436.5	379.5	2	943.53	8.64	0.00815	21.9607	7.779e-05	6.765e-09	4.42
532	High	[K].QESEMAAEGTTVQTTGAK.[N]	1xTMTpro [K18]; 1xTMTpro [N-Term]	0.000133789	1	2	1	A0A6P6X5Y9	A0A6P6X5Y9 [278-295]	A0A6P6X5Y9; A0A6P6XFK6	0	2447.26	18	83.9	102.8	82.9	101.3	113.3	95.7	99.9	101.9	95.5	122.1	99.1	115.3	81	138.8	119.5	152.3	83.5	182.1	154.2	167.8	164.1	128.2	180.5	165.5	3	816.431	8.94	0.00729	21.5454	7.779e-05	6.241e-08	3.69
533	High	[R].QESDRHTDVLDAITR.[H]	1xTMTpro [N-Term]	0.000133789	1	2	1	A0A6P6S900	A0A6P6S900 [451-465]	A0A6P6SC07; A0A6P6S900	1	2060.07	15	99.8	105.4	98.8	102.9	76.7	100.2	101.1	105.5	92.5	76.5	106.4	97.7	52.3	77.3	77.3	84	30.7	103.5	84.7	94.3	86.3	43.6	105.2	76.1	4	515.775	4.54	0.00234	21.997	7.779e-05	5.653e-05	3.44
534	High	[K].QEQTAFIEEISR.[T]	1xTMTpro [N-Term]	0.000133789	1	2	2	A0A6P6TPR1	A0A6P6TPR1 [260-271]	A0A6P6TPR1; A0A6P6TM59	0	1754.92	12	94.9	113.5	108.1	85.7	79.3	100.5	103.7	99	101.3	71.1	96.6	76.8	304	508.7	516.8	427.4	193.9	634.2	530.9	541.1	577.9	247.7	583.5	365.8	2	877.968	2.97	0.00261	38.9558	7.779e-05	8.64e-08	4.3
535	High	[R].QEQLNAQFAR.[A]	1xTMTpro [N-Term]	0.000133789	2	2	1	A0A6P6T468; A0A6P6SSE9	A0A6P6T468 [173-182]; A0A6P6SSE9 [173-182]	A0A6P6T468; A0A6P6SSE9	0	1508.81	10	89.3	100.5	95.5	82.4	58.2	75	92.2	84.3	84.7	77.2	110.5	81.4	112.3	176.9	179.4	161.4	55.9	185.9	185.4	181	189.7	105.7	262.2	152.2	2	754.918	9.76	0.00736	19.6326	7.779e-05	8.428e-05	2.12
536	High	[K].QEQGNPPDYCVANQQWPCAPGKK.[Y]	2xCarbamidomethyl [C10; C18]; 2xTMTpro [K22; K23]; 1xTMTpro [N-Term]	0.000133789	2	2	4	A0A6P6TL51; A0A6P6TAJ5	A0A6P6TL51 [108-130]; A0A6P6TAJ5 [108-130]	A0A6P6TL51; A0A6P6TAJ5	1	3584.82	23	48.9	59.6	48.6	86.4	90	77	81.1	82.9	92.3	285.5	212.1	167.6	169.4	288.5	251.1	465.7	238	525.4	449	489.5	569	1075.2	1384.9	862.2	3	1195.61	1.93	0.00231	31.2554	7.779e-05	3.409e-12	6.46
537	High	[K].QEQGNPPDYCVANQQWPCAPGKK.[Y]	2xCarbamidomethyl [C10; C18]; TMTpro [K]; 1xTMTpro [N-Term]	0.000133789	2	2	1	A0A6P6TL51; A0A6P6TAJ5	A0A6P6TL51 [108-130]; A0A6P6TAJ5 [108-130]	A0A6P6TL51; A0A6P6TAJ5	1	3280.61	23	43.4	47.3	46.9	81.3	123.6	75.3	84.6	80.5	83.9	406.3	165.8	198.2	44.8	68.3	72.3	130.7	97.4	153.2	139.6	141.8	154.2	456.2	322.8	304.1	3	1094.21	4.15	0.00454	35.8291	7.779e-05	3.265e-07	3.89
538	High	[K].QEQGNPPDYCVANQQWPCAPGK.[K]	2xCarbamidomethyl [C10; C18]; 1xTMTpro [K22]; 1xTMTpro [N-Term]	0.000133789	2	2	5	A0A6P6TL51; A0A6P6TAJ5	A0A6P6TL51 [108-129]; A0A6P6TAJ5 [108-129]	A0A6P6TL51; A0A6P6TAJ5	0	3152.52	22	56.2	68.8	57.9	95.1	94.6	91.2	113.3	109.5	100.6	212.4	195.8	246.8	146.2	250.3	224.8	385.3	188.1	467.5	471.4	486.3	466.2	601.3	961.4	954.6	3	1051.52	6.37	0.0067	34.1907	7.779e-05	1.25e-08	5.91
539	High	[R].QEQDQAAVESHKK.[A]	2xTMTpro [K12; K13]; 1xTMTpro [N-Term]	0.000133789	1	2	1	A0A6P6WNB8	A0A6P6WNB8 [214-226]	A0A6P6WWA9; A0A6P6WNB8	1	2410.35	13																									4	603.348	7.43	0.00448	12.619	7.779e-05	2.554e-06	5.37
540	High	[R].QELSNGQVQVEK.[Q]	1xTMTpro [K12]; 1xTMTpro [N-Term]	0.000133789	1	1	3	A0A6P6X4A5	A0A6P6X4A5 [209-220]	A0A6P6X4A5	0	1967.11	12	91.7	108.8	102.1	128.3	124.5	128.6	111.7	116.1	117.1	90.1	91.9	97.4	290.3	482	482.4	632.8	301.2	802.3	565.4	627.4	660.7	310.6	549.3	458.7	2	984.059	2.83	0.00278	23.0659	7.779e-05	1.672e-08	5.38
541	High	[R].QELSNGEVHVEK.[L]	1xTMTpro [K12]; 1xTMTpro [N-Term]	0.000133789	1	1	1	A0A6P6XCT9	A0A6P6XCT9 [209-220]	A0A6P6XCT9	0	1977.09	12	93.6	79.2	76.1	129.2	165.4	109.8	94.1	103.4	103.5	117.9	104.6	110.6	63.5	75.2	77	136.5	85.7	146.7	102	119.6	125	87	133.8	111.5	3	659.705	5.2	0.00343	20.4074	7.779e-05	9.625e-09	4.33
542	High	[R].QELDQIEFSGENVIK.[E]	1xTMTpro [K15]; 1xTMTpro [N-Term]	0.000133789	1	1	1	A0A6P6WHT1	A0A6P6WHT1 [326-340]	A0A6P6WHT1	0	2357.28	15	113.5	104.8	123.5	93.2	120.3	96.8	89.1	88.3	101.2	111.9	97.9	99.7	108.3	139.9	175.9	138.6	87.7	182.1	136	143.7	172	116.2	176.3	141.4	3	786.442	10.87	0.00854	44.8162	7.779e-05	1.317e-07	3.44
543	High	[R].QEGQGGGVLHAVGETLAEIGQTTK.[D]	1xTMTpro [K24]; 1xTMTpro [N-Term]	0.000133789	1	2	2	A0A6P6XJ69	A0A6P6XJ69 [349-372]	A0A6P6XLV1; A0A6P6XJ69	0	2988.62	24	82.7	93.6	96	93.9	129.6	93.5	74.8	76.3	75.7	140.3	97.9	109.9	136.3	215.9	236.3	241.1	163.2	303.9	197.3	214.7	222.2	251.7	304.5	269.4	3	996.89	10.04	0.01	53.5814	7.779e-05	6.216e-12	6.75
544	High	[R].QEFATDVNIAFLEDFGGGR.[M]	1xTMTpro [N-Term]	0.000133789	1	1	6	A0A6P6VBR3	A0A6P6VBR3 [50-68]	A0A6P6VBR3	0	2390.19	19	115.2	170.5	165.1	77.1	33.5	86.4	76.2	81.4	82.7	46.1	110.7	92.1	744.5	1541.4	1592.3	775.8	165.5	1099.5	787.6	897.5	952	324.4	1349.6	884.5	2	1195.6	2.19	0.00262	51.7211	7.779e-05	3.961e-15	4.95
545	High	[K].QEEYFGGSK.[F]	1xTMTpro [K9]; 1xTMTpro [N-Term]	0.000133789	1	2	1	A0A6P6WF48	A0A6P6WF48 [134-142]	A0A6P6VWG7; A0A6P6WF48	0	1652.88	9	97.6	107.3	98.9	98	133.5	95.9	101.8	100.1	100.5	111.5	167.6	105	240.4	370.1	363.9	376.2	251.2	465.8	401	420.9	441.1	299	779.2	384.7	2	826.947	5.13	0.00424	23.2643	7.779e-05	0.0002061	2.31
546	High	[R].QEEAGQGEGGRPHEGGR.[E]	1xTMTpro [N-Term]	0.000133789	1	1	6	A0A6P6T6X1	A0A6P6T6X1 [535-551]	A0A6P6T6X1	0	2054.99	17	162.1	130.4	143.3	128.2	41.5	115	149.7	138.2	105.8	42.8	121.4	105.9	91.1	102.5	120.2	112.2	17.8	127.4	134.5	132.5	105.9	26.2	128.7	88.5	3	685.673	5.6	0.00384	8.0174	7.779e-05	5.271e-08	4.23
547	High	[R].QEDTIIFSLIER.[A]	1xTMTpro [N-Term]	0.000133789	1	3	3	A0A6P6TYE8	A0A6P6TYE8 [19-30]	A0A6P6TYE8; A0A6P6TMH1; A0A6P6TWS9	0	1767.98	12	86.1	113.7	108.1	89.1	86.3	96	104.6	97.3	102.3	90.2	113.9	86.1	138.8	256.4	260.1	223.8	106.2	304.9	269.7	267.7	293.8	158.3	346.5	206.2	3	590.002	6.45	0.0038	51.1626	7.779e-05	1.768e-05	3.85
548	High	[R].QEALLLSEQSQQGKR.[E]	1xTMTpro [K14]; 1xTMTpro [N-Term]	0.000133789	1	1	28	A0A6P6WMC4	A0A6P6WMC4 [470-484]	A0A6P6WMC4	1	2323.32	15	101.4	110.5	102.4	85.8	95.2	94	107.3	104	108.9	96.7	110.3	71	2574.6	3926.8	3882.7	3394.6	1846.2	4707.1	4359.2	4508.6	4925	2672.5	5284.3	2682.2	3	775.114	2.45	0.0019	24.9966	7.779e-05	4.102e-14	4.4
549	High	[R].QEALLLSEQSQQGKR.[E]	1xTMTpro [N-Term]; 1xTMTpro [K14]	0.000133789	1	1	4	A0A6P6WMC4	A0A6P6WMC4 [470-484]	A0A6P6WMC4	1	2019.12	15	118.1	120.1	106.4	82	94.3	84.4	105.9	96.6	103.9	89.7	98.9	78	417.9	594.3	561.8	451.8	254.7	588.7	598.9	583.1	654.3	345.1	660.2	410.1	3	673.712	3.42	0.0023	21.4897	7.779e-05	2.969e-11	4.72
550	High	[R].QEALLLSEQSQQGK.[R]	1xTMTpro [K14]; 1xTMTpro [N-Term]	0.000133789	1	1	141	A0A6P6WMC4	A0A6P6WMC4 [470-483]	A0A6P6WMC4	0	2167.22	14	110.8	122.2	114	76.3	100	84.5	103.6	98	104.5	94.5	94.2	83.5	9461.8	14597.4	14526	10147.2	6519	14224.8	14143	14271.4	15885.2	8779	15175	10600.8	2	1084.12	5.21	0.00565	33.5019	7.779e-05	1.15e-11	5.68
551	High	[R].QEALLLSEQSQQGK.[R]	1xTMTpro [K14]; 1xTMTpro [N-Term]	0.000133789	1	1	39	A0A6P6WMC4	A0A6P6WMC4 [470-483]	A0A6P6WMC4	0	1863.01	14	122.2	103.6	100.8	79.1	141.3	76.4	88.7	84.7	90	124.7	79.1	88.3	3520.5	4176	4336.4	3550.3	3109.2	4339	4085.3	4166.2	4616.9	3908.8	4301.1	3780.5	2	932.015	4.62	0.0043	26.1828	7.779e-05	5.405e-11	5.22
552	High	[K].QEALKDDHDAFTVVIGSR.[A]	1xTMTpro [K5]; 1xTMTpro [N-Term]	0.000133789	1	2	1	A0A6P6TIW2	A0A6P6TIW2 [135-152]	A0A6P6TCV1; A0A6P6TIW2	1	2609.42	18	85.1	96.2	89.5	69.6	77.8	81.8	91.6	88.3	80.9	83.2	78.8	69.6	129.3	204.3	202.8	164.7	90.2	244.7	222.4	228.7	218.9	137.4	225.7	157.1	4	653.114	5.61	0.00366	35.2057	7.779e-05	2.686e-06	3.92
553	High	[R].QEAEEKANEISVSAEEEFNIEK.[L]	2xTMTpro [K6; K22]; 1xTMTpro [N-Term]	0.000133789	1	1	1	A0A6P6TUL0	A0A6P6TUL0 [19-40]	A0A6P6TUL0	1	3435.79	22	90.8	92.5	98.7	111.9	119.3	127	116.3	116.1	137.3	130.4	112	68.3	78.9	112.5	128.1	151.5	79.2	217.5	161.6	172.2	212.5	123.3	183.6	88.2	4	859.713	9.9	0.00851	44.666	7.779e-05	6.101e-09	4.4
554	High	[K].QDYKDDITREEAVQLALK.[V]	2xTMTpro [K4; K18]; 1xTMTpro [N-Term]	0.000133789	1	1	1	A0A6P6U8X6	A0A6P6U8X6 [177-194]	A0A6P6U8X6	2	3047.72	18	96.9	103.9	104.5	100.4	115.9	118.7	110.8	103.7	119.3	117.1	110.1	84	200.4	300.7	322.4	323.4	183.1	483.8	366.4	365.7	439.2	263.4	429.5	258.2	3	1016.58	6.35	0.00645	41.0283	7.779e-05	3.614e-06	3.45
555	High	[R].QDTWFADDSPAISNK.[G]	1xTMTpro [K15]; 1xTMTpro [N-Term]	0.000133789	1	1	1	A0A6P6WID9	A0A6P6WID9 [374-388]	A0A6P6WID9	0	2303.18	15	106.6	89.8	87	74.2	141.7	78.3	88.5	79.7	85.2	127.9	67.1	75.4	143.2	168.7	174.3	155.2	145.3	207.1	190	182.7	203.7	186.9	170.1	150.5	3	768.4	2.42	0.00186	41.6101	7.779e-05	0.0001346	2.17
556	High	[R].QDSSSGSVTESLR.[D]	1xTMTpro [N-Term]	0.000133789	1	2	1	A0A6P6SHL6	A0A6P6SHL6 [95-107]	A0A6P6SHL6; A0A6P6T478	0	1656.84	13	104.3	131.6	119.7	102.6	40.8	105.9	122.2	123.1	122.3	59.2	120.3	86.9	104.7	184.8	179.3	160.4	31.3	209.4	196.1	210.8	218.5	64.6	227.7	129.6	2	828.927	6.93	0.00574	14.8476	7.779e-05	2.349e-08	3.66
557	High	[R].QDQPSLLHK.[N]	1xTMTpro [K9]; 1xTMTpro [N-Term]	0.000133789	1	1	1	A0A6P6S5C1	A0A6P6S5C1 [62-70]	A0A6P6S5C1	0	1673.98	9	68.2	78.2	68.2	72.4	270.8	64.2	78.7	80	73.2	206.1	74.6	84.7	117	187.8	174.7	193.5	354.9	217.2	215.8	234.3	223.6	384.7	241.4	216	3	558.669	5.75	0.00321	20.5506	7.779e-05	7.968e-06	3.68
558	High	[R].QDMVVVEVPK.[L]	1xOxidation [M3]; 1xTMTpro [K10]; 1xTMTpro [N-Term]	0.000133789	1	3	2	A0A6P6WMQ6	A0A6P6WMQ6 [95-104]	A0A6P6WMQ6; A0A6P6WU53; A0A6P6WNC1	0	1768.02	10	84.6	71.8	66.6	71.9	94.5	82.9	127.6	141.7	129.1	199.6	137.5	148.3	41	48.7	48.2	54.3	35	79.2	98.9	117.2	111.5	105.3	125.8	106.9	3	590.013	4.92	0.0029	32.5689	7.779e-05	5.119e-05	3.16
559	High	[K].QFAAEEISSMVLNK.[M]	1xTMTpro [K14]; 1xTMTpro [N-Term]	0.000133789	1	2	2	A0A6P6VP42	A0A6P6VP42 [117-130]	A0A6P6W6K4; A0A6P6VP42	0	2175.2	14	89.2	95.8	89.6	103	119.9	111.1	108.5	97.9	111.8	178.9	157.5	139.3	103.8	156	155.6	186.7	106.5	254.8	201.9	194.3	231.7	226.4	345.6	240.9	2	1088.11	5.41	0.00588	49.2946	7.779e-05	4.05e-10	4.66
560	High	[R].QDMVVVEVPK.[L]	1xTMTpro [K10]; 1xTMTpro [N-Term]	0.000133789	1	3	2	A0A6P6WMQ6	A0A6P6WMQ6 [95-104]	A0A6P6WMQ6; A0A6P6WU53; A0A6P6WNC1	0	1752.02	10	45.9	74.8	55.1	64.5	56.1	72.4	131.1	135.8	155.1	210.7	191.9	155.1	92	209.7	164.6	201.2	85.8	285.7	419.9	463.9	553.2	459.1	724.9	461.7	2	876.521	7.68	0.00673	41.1006	7.779e-05	3.149e-05	2.93
561	High	[K].QFAAEEISSMVLTK.[M]	1xTMTpro [K14]; 1xTMTpro [N-Term]	0.000133789	1	1	2	A0A6P6UA78	A0A6P6UA78 [117-130]	A0A6P6UA78	0	2162.2	14	62.2	75.9	77.9	98.5	110.7	101.4	89.7	87.6	100.3	158.8	126.7	125.7	99.9	170.6	186.9	246.4	135.8	321	230.4	240.2	286.9	277.6	384.2	300.3	2	1081.61	7.99	0.00863	49.2487	7.779e-05	1.538e-10	5.07
562	High	[K].QFAQTGLWDWVK.[F]	1xTMTpro [K12]; 1xTMTpro [N-Term]	0.000133789	1	3	1	A0A6P6WBD4	A0A6P6WBD4 [157-168]	A0A6P6WBD4; A0A6P6W801; A0A6P6VPC9	0	2087.16	12	85.2	114.3	114.5	96.5	86.8	103.1	107.5	100.4	95	106.7	127.9	122.9	86.1	161.6	172.7	151.9	67	205.3	173.7	173.2	171	117.4	243.9	184.6	3	696.395	6.05	0.00421	50.4395	7.779e-05	1.244e-05	2.94
563	High	[R].QGNDVGTQYR.[S]	1xTMTpro [N-Term]	0.000133789	1	2	1	A0A6P6VNG2	A0A6P6VNG2 [219-228]	A0A6P6VNG2; A0A6P6VZ87	0	1441.74	10	111.8	115.4	110.2	113.3	93.5	112.2	121.1	122.7	118	73.5	127.2	99.1	57.3	82.7	84.3	90.4	36.6	113.3	99.2	107.3	107.7	41	122.9	75.5	2	721.377	7.15	0.00515	11.6604	7.779e-05	3.074e-05	2.96
564	High	[R].QGNAGIVEYAYQR.[T]	1xTMTpro [N-Term]	0.000133789	1	2	2	A0A6P6UPC4	A0A6P6UPC4 [686-698]	A0A6P6UPC4; A0A6P6URT7	0	1772.93	13	96.5	119.8	109.7	83.2	59.5	95.8	95.4	101.7	100.2	59.1	106.8	79	343.2	595.9	582.3	460.9	161.7	671.7	542.6	616.9	634.5	228.8	716.4	417.8	2	886.973	8.14	0.00722	24.6874	7.779e-05	1.112e-06	3.94
565	High	[K].QGLPEILDGVALNPYVHR.[Y]	1xTMTpro [N-Term]	0.000133789	1	2	1	A0A6P6TMS7	A0A6P6TMS7 [332-349]	A0A6P6TMS7; A0A6P6TA71	0	2295.28	18	100.9	108.3	116.4	98.3	97.6	115.5	91.4	99.9	101	86.7	86.3	84.7	24.9	37.4	42.9	37.8	18.4	56.2	36.1	42.1	44.4	23.3	40.2	31.1	3	765.773	10.88	0.00833	48.2084	7.779e-05	3.689e-10	4.61
566	High	[K].QGLPAQPPIPLIPK.[T]	1xTMTpro [K14]; 1xTMTpro [N-Term]	0.000133789	1	1	1	A0A6P6V6F9	A0A6P6V6F9 [85-98]	A0A6P6V6F9	0	2077.3	14	101.5	106.3	107.9	103.1	132.9	118.6	106.9	100.3	107.3	109.2	111	103.5	57.6	84.4	91.4	91.1	57.6	132.6	97	97.1	108.4	67.4	118.8	87.3	3	693.111	7.78	0.00539	47.917	7.779e-05	6.09e-06	2.5
567	High	[K].QGLGESTYYNNEQQGLGETK.[L]	1xTMTpro [K20]; 1xTMTpro [N-Term]	0.000133789	1	2	1	A0A6P6VQQ2	A0A6P6VQQ2 [155-174]	A0A6P6VQQ2; A0A6P6VTZ7	0	2824.42	20	72.5	82.8	68.2	135.2	163.3	126.5	122.7	131.5	143.7	118.5	91.4	83.3	49.8	79.6	69.9	144.7	85.7	171.2	134.8	154.1	175.8	88.6	118.4	85.1	3	942.148	1.44	0.00136	29.8552	7.779e-05	6.344e-08	4.87
568	High	[R].QGLFTSDQDLYTDRR.[T]	1xTMTpro [N-Term]	0.000133789	1	3	4	A0A6P6UQF4	A0A6P6UQF4 [273-287]	A0A6P6UHV5; A0A6P6UQL0; A0A6P6UQF4	1	2119.07	15	116.8	151.3	135.1	80.7	56.2	90	101.7	98.1	103.9	53	89.6	63.7	605.2	1096.7	1044.3	651.4	222.2	919	842	867	958.2	298.9	875.3	490.6	2	1060.05	6.97	0.00738	30.361	7.779e-05	1.379e-09	4.48
569	High	[R].QGLFTSDQDLYTDR.[R]	1xTMTpro [N-Term]	0.000133789	1	3	3	A0A6P6UQF4	A0A6P6UQF4 [273-286]	A0A6P6UHV5; A0A6P6UQL0; A0A6P6UQF4	0	1962.97	14	102.8	124.6	118.1	70.5	75.4	83.9	84.5	85.6	91.8	66.7	72.5	63.2	459.4	779.4	788.4	490.8	257.3	739.5	604.2	653.2	730.7	324.5	611.7	419.9	2	981.996	6.42	0.0063	36.7644	7.779e-05	3.202e-09	3.57
570	High	[K].QGGGTEVVK.[T]	1xTMTpro [K9]; 1xTMTpro [N-Term]	0.000133789	1	1	1	A0A6P6W5U2	A0A6P6W5U2 [444-452]	A0A6P6W5U2	0	1482.88	9	105.7	97.1	96.5	97.7	105.9	79.7	99.3	112.2	92.4	73.4	79.9	83.6	253.1	325.3	344.8	364.4	193.7	375.9	380.2	458.4	394.2	191.3	361.1	297.4	2	741.948	7.22	0.00535	16.0279	7.779e-05	3.005e-05	2.25
571	High	[R].QGGDVGTQYR.[S]	1xTMTpro [N-Term]	0.000133789	1	2	2	A0A6P6XAD7	A0A6P6XAD7 [113-122]	A0A6P6XAD7; A0A6P6XKF6	0	1384.71	10	101.2	153.7	132.9	89.1	32.4	100.2	119.9	126.8	111.9	52.2	150.3	104.9	265	563.1	519.5	363.4	64.8	517	502	566.6	522	148.8	742.4	408.3	2	692.865	6.02	0.00417	11.8278	7.779e-05	1.934e-05	3.73
572	High	[R].QGETVVPGGTGGK.[S]	1xTMTpro [K13]; 1xTMTpro [N-Term]	0.000133789	2	2	2	A0A6P6T3Y2; A0A6P6SS29	A0A6P6T3Y2 [17-29]; A0A6P6SS29 [17-29]	A0A6P6T3Y2; A0A6P6SS29	0	1795.02	13	91.9	104.3	116.2	93.7	108.7	107.6	81.4	88.5	93.6	79.7	92.6	72.3	533	846.1	1006.5	846.5	481.5	1230.6	755.4	875.9	967	503.1	1013.4	623.7	2	898.02	6.27	0.00563	19.4141	7.779e-05	2.253e-10	4.56
573	High	[K].QGESAAGDDDDEGGVVVGEVEAPK.[L]	1xTMTpro [K24]; 1xTMTpro [N-Term]	0.000133789	1	1	1	A0A6P6SXF2	A0A6P6SXF2 [119-142]	A0A6P6SXF2	0	2938.44	24	88.5	99.3	88.3	79.3	95.1	89.8	86.5	79.9	100.8	70.6	79	66.4	122.1	191.7	181.9	170.4	100.3	244.3	191	188.1	247.8	106	205.8	136.2	3	980.157	5.27	0.00516	32.5487	7.779e-05	7.199e-10	4.23
574	High	[K].QGDSQGNAFWK.[L]	1xTMTpro [K11]; 1xTMTpro [N-Term]	0.000133789	1	1	2	A0A6P6W5U2	A0A6P6W5U2 [477-487]	A0A6P6W5U2	0	1845.97	11	107.9	109.4	109.3	86.8	108.4	99.9	99.5	102.4	103.8	87	82	74.5	287.5	408	434.9	360.4	220.6	524.7	423.9	465.6	492.8	252.2	412.1	295.1	3	616	6.05	0.00372	30.9013	7.779e-05	5.114e-08	4.44
575	High	[K].QGDMILVVPEGHAAIR.[L]	1xOxidation [M4]; 1xTMTpro [N-Term]	0.000133789	1	3	1	A0A6P6TSW3	A0A6P6TSW3 [72-87]	A0A6P6TS14; A0A6P6TSW3; A0A6P6U482	0	2026.11	16	112.4	129.7	121.3	90.8	103	98.4	107.1	109.7	118	89.5	93.3	86.2	91.6	147.9	147.5	115.2	64.1	158	139.6	152.6	171.3	79.4	143.5	104.4	3	676.043	3.22	0.00218	29.3002	7.779e-05	1.723e-09	4.46
576	High	[K].QGAVTSVK.[N]	1xTMTpro [K8]; 1xTMTpro [N-Term]	0.000133789	1	1	2	A0A6P6VAA7	A0A6P6VAA7 [135-142]	A0A6P6VAA7	0	1397.86	8	60.9	83.1	76	100.9	67.1	60.6	118.3	105.4	92.5	170.8	208.6	278.5	63.1	120.5	117.6	162.9	53.1	123.8	196	186.3	170.6	192.5	407.7	428.9	2	699.439	7.06	0.00493	17.339	7.779e-05	0.0004153	2.84
577	High	[K].QFYVNVEKEEWK.[L]	2xTMTpro [K8; K12]; 1xTMTpro [N-Term]	0.000133789	2	4	2	A0A6P6TNY8; A0A6P6XHB6	A0A6P6TNY8 [256-267]; A0A6P6XHB6 [255-266]	A0A6P6TNY8; A0A6P6XHB6; A0A6P6VE46; A0A6P6U1F9	1	2511.41	12	78.3	83.9	91.6	123.9	148.9	126.4	106.2	91.8	108.4	136.4	117.3	117.2	225.8	338.6	394.3	556.6	328.2	718.9	489.9	452.1	557.2	428.1	638.6	502.6	3	837.813	6.89	0.00577	41.7432	7.779e-05	3.609e-07	4.55
578	High	[K].QFVSASDEEKK.[S]	2xTMTpro [K10; K11]; 1xTMTpro [N-Term]	0.000133789	1	1	2	A0A6P6VXS4	A0A6P6VXS4 [277-287]	A0A6P6VXS4	1	2180.24	11	83.9	94.5	105.1	123.5	112.9	121	97.7	106	117.1	128	115.5	107.3	218.6	344.6	408.8	501.3	224.6	621.5	407.2	471.4	543.3	363	567.8	415.7	3	727.422	5.87	0.00427	22.728	7.779e-05	3.299e-09	3.47
579	High	[K].QFVIDGNK.[V]	1xTMTpro [K8]; 1xTMTpro [N-Term]	0.000133789	1	2	3	A0A6P6UHG7	A0A6P6UHG7 [190-197]	A0A6P6UHG7; A0A6P6W8K6	0	1528.9	8	103.4	112.9	114.5	106.1	100	124.8	97.9	100.7	100.7	88.1	100.3	93	342.8	523.7	566.7	548	253.4	815.7	519.1	569.8	594.7	317.9	627.6	458.7	2	764.958	7.73	0.00591	31.7206	7.779e-05	0.0004014	2.88
580	High	[R].QFTPEQFANALIGQYSQQIR.[R]	1xTMTpro [N-Term]	0.000133789	1	2	2	A0A6P6VT21	A0A6P6VT21 [190-209]	A0A6P6VT21; A0A6P6WAH1	0	2643.39	20	133	156.6	106.6	124.7	107.5	146.2	107.6	118.1	124.3	115	117.9	92.5	23.5	38.7	28.1	34.3	14.5	50.9	30.4	35.6	39.1	22.1	39.3	24.3	3	881.807	8.6	0.00758	53.3422	7.779e-05	4.678e-10	4.52
581	High	[R].QFSGFVADEDVGK.[E]	1xTMTpro [K13]; 1xTMTpro [N-Term]	0.000133789	1	2	1	A0A6P6SFJ9	A0A6P6SFJ9 [160-172]	A0A6P6SFJ9; A0A6P6SGL2	0	2007.07	13	94.9	88	91.2	81.6	116.4	88.4	72.1	79.7	86.5	127.3	93.9	111.2	119.6	155.1	171.5	160.1	112	219.6	145.2	171.3	194.1	174.5	223.2	208.2	3	669.7	8.23	0.0055	40.1076	7.779e-05	1.102e-06	3.06
582	High	[K].QFQGAVDAAR.[K]	1xTMTpro [N-Term]	0.000133789	1	1	1	A0A6P6W6X9	A0A6P6W6X9 [1250-1259]	A0A6P6W6X9	0	1366.74	10	115.6	149.5	119.4	107.4	53.6	96.7	118.8	115.9	106.4	60	126.4	107.6	79.4	143.6	122.4	114.9	28.1	130.9	130.4	135.8	130.1	44.8	163.8	109.8	2	683.878	6.41	0.00438	18.062	7.779e-05	1.065e-05	2.99
583	High	[K].QFNPGYQVGTDFISSNLLR.[D]	1xTMTpro [N-Term]	0.000133789	1	3	2	A0A6P6UJU7	A0A6P6UJU7 [263-281]	A0A6P6UJU7; A0A6P6VHU9; A0A6P6UT33	0	2460.28	19	60.3	95.6	80	118.1	41.9	138	171.2	192.2	169.2	60	128.7	98.5	129	286.2	255.3	393.5	68.4	581.8	585.6	701.5	644.5	139.7	519.3	313.2	2	1230.65	6.25	0.00769	48.8301	7.779e-05	1.913e-13	4.41
584	High	[K].QFNPGYQVGTDFISSNLLR.[D]		0.000133789	1	3	1	A0A6P6UJU7	A0A6P6UJU7 [263-281]	A0A6P6UJU7; A0A6P6VHU9; A0A6P6UT33	0	2156.08	19																									2	1078.55	8.54	0.00921	53.5048	7.779e-05	4.846e-06	3.02
585	High	[R].QFHSQENIIR.[I]	1xTMTpro [N-Term]	0.000133789	1	1	1	A0A6P6T702	A0A6P6T702 [777-786]	A0A6P6T702	0	1575.86	10																									3	525.961	6.92	0.00364	16.1331	7.779e-05	5.136e-05	2.93
586	High	[K].QFGSLAEYTAVEEK.[L]	1xTMTpro [K14]; 1xTMTpro [N-Term]	0.000133789	1	2	1	A0A6P6UXA5	A0A6P6UXA5 [185-198]	A0A6P6UXA5; A0A6P6VCI5	0	2180.17	14	104.3	91.3	86.4	82.7	104.9	87.2	79.7	73.4	75.8	106.7	80.5	72.5	94.1	115.3	116.4	116.2	72.3	155.1	115	113	121.9	104.8	137.1	97.3	3	727.402	7.98	0.0058	43.1992	7.779e-05	2.423e-05	4.32
587	High	[K].QFFPDVAVGFEDPR.[V]	1xTMTpro [N-Term]	0.000133789	1	3	2	O82147	O82147 [142-155]	O82147; A0A6P6VEE0; A0A6P6V6C1	0	1927.99	14	104.8	130.1	108.6	105.1	60.2	127.5	125.7	122.1	115	79.4	133.7	115.1	154.8	268.9	239.6	241.8	67.9	371.4	296.9	307.8	302.6	127.7	372.6	252.7	3	643.339	7.64	0.00491	48.6568	7.779e-05	1.098e-07	3
588	High	[K].QFENPANPK.[I]	1xTMTpro [K9]; 1xTMTpro [N-Term]	0.000133789	1	2	2	A0A6P6VWH3	A0A6P6VWH3 [149-157]	A0A6P6VWH3; A0A6P6VYJ7	0	1652.93	9	93.2	111.8	116.8	99.3	97.9	118	93.9	98.8	107.6	82.4	92.1	74.7	178.2	299.1	333.4	295.6	143	444.7	286.9	322.2	366.5	171.4	332.3	212.2	2	826.971	5.71	0.00472	22.284	7.779e-05	0.0001261	3.15
589	High	[K].QFEEFAESFEVNKR.[T]	1xTMTpro [K13]; 1xTMTpro [N-Term]	0.000133789	1	2	1	A0A6P6TPI6	A0A6P6TPI6 [318-331]	A0A6P6TPI6; A0A6P6VK14	1	2368.24	14	88.6	103	96.6	98.6	72.3	101.1	96.8	100.4	88.8	81	100.1	92.8	151.3	246	246.2	262	94.3	340	264.2	292.4	270	150.5	322.2	235.5	3	790.09	5.8	0.00458	44.6138	7.779e-05	2.997e-06	3.35
590	High	[R].QFDTASGSETPAQPSTTEEEAR.[D]	1xTMTpro [N-Term]	0.000133789	1	2	1	A0A6P6SFQ9	A0A6P6SFQ9 [957-978]	A0A6P6SFQ9; A0A6P6SHH8	0	2643.23	22	109.4	126.2	125.4	96.9	74	94.5	115.4	118.8	136.4	70.9	105.7	78.9	61.4	99.1	105	84.7	31.7	104.5	103.5	113.7	136.3	43.3	111.9	65.8	3	881.752	2.38	0.00209	19.1161	7.779e-05	1.565e-10	4.62
591	High	[R].QFDAASGSETPAQPSTTEEEAR.[D]	1xTMTpro [N-Term]	0.000133789	1	1	1	A0A6P6S7R6	A0A6P6S7R6 [957-978]	A0A6P6S7R6	0	2613.22	22	84.6	107.5	95	76.2	58.4	88.6	87.9	83.7	96.7	48.7	84.3	59.4	66.7	118.6	111.9	93.6	35.2	137.8	110.9	112.7	135.8	41.8	125.5	69.7	3	871.749	3.36	0.00293	19.7046	7.779e-05	2.376e-11	6.7
592	High	[K].QFAAEEISSMVLTK.[M]	1xOxidation [M10]; 1xTMTpro [K14]; 1xTMTpro [N-Term]	0.000133789	1	1	1	A0A6P6UA78	A0A6P6UA78 [117-130]	A0A6P6UA78	0	2178.2	14	83.5	82	82.2	100.6	142	87.8	97.6	105.6	100.6	166.5	114.4	114.3	48.1	66.1	70.7	90.3	62.5	99.7	89.9	103.8	103.3	104.4	124.4	97.9	3	726.743	7.99	0.0058	44.4735	7.779e-05	3.632e-08	4.34
593	High	[R].QGNEYLINLIDSPGHVDFSSEVTAALR.[I]	1xTMTpro [N-Term]	0.000133789	1	3	1	A0A6P6U1Q3	A0A6P6U1Q3 [94-120]	A0A6P6U1Q3; A0A6P6TR19; A0A6P6SES8	0	3249.67	27	96	124.3	103.1	106.4	82.7	99.9	102.4	113.2	105.8	121.3	104.5	112.8	81.9	148.4	131.4	141.4	53.9	168.1	139.7	164.8	160.8	112.7	168.2	143.1	3	1083.9	6.13	0.00664	51.2143	7.779e-05	5.411e-23	8.33
594	High	[R].QDIVVVEVPK.[L]	1xTMTpro [K10]; 1xTMTpro [N-Term]	0.000133789	1	1	3	A0A6P6WUD7	A0A6P6WUD7 [95-104]	A0A6P6WUD7	0	1734.07	10	53.7	79.2	67.4	69.5	58.6	77.7	133.3	129.3	131.4	182.5	203.5	174.2	271.8	560.7	509.2	547.8	226.4	774.8	1078.6	1116.4	1183.8	1004.7	1941.8	1310.3	3	578.698	8.46	0.00489	42.2043	7.779e-05	3.221e-05	2.77
595	High	[K].QDLPNAMNAAEITDK.[L]	1xOxidation [M7]; 1xTMTpro [K15]; 1xTMTpro [N-Term]	0.000133789	1	3	1	A0A6P6T750	A0A6P6T750 [128-142]	A0A6P6T750; A0A6P6V4W9; A0A6P6VZH0	0	2255.18	15	86.4	100.3	95.5	96.5	94.1	97	104.9	118.6	108.7	109.7	119.4	132.4	82.5	133.9	136	143.4	68.6	182.5	160	193.1	184.7	113.9	214.9	187.8	2	1128.1	2.85	0.00321	31.6843	7.779e-05	5.806e-10	4.05
596	High	[K].NYMDAQYFGEIGIGTPPQK.[F]	1xOxidation [M3]; 1xTMTpro [K19]; 1xTMTpro [N-Term]	0.000133789	2	2	1	A0A6P6UHN6; A0A6P6UBA0	A0A6P6UHN6 [84-102]; A0A6P6UBA0 [84-102]	A0A6P6UHN6; A0A6P6UBA0	0	2753.41	19	116.7	140.9	129.7	86.2	61.5	108.4	104.7	114.9	111.6	61.1	103.8	73.5	90.7	153.2	150.4	104.4	36.5	166	130.1	152.4	154.5	51.7	152.2	84.9	3	918.483	8.77	0.00805	44.5528	7.779e-05	7.068e-09	5.06
597	High	[K].NYMDAQYFGEIGIGTPPQK.[F]	1xTMTpro [K19]; 1xTMTpro [N-Term]	0.000133789	2	2	4	A0A6P6UHN6; A0A6P6UBA0	A0A6P6UHN6 [84-102]; A0A6P6UBA0 [84-102]	A0A6P6UHN6; A0A6P6UBA0	0	2737.42	19	106	96.2	109.4	74.5	87.7	79.8	79.7	76.7	85.6	96.3	85.3	98.1	289.5	367.6	445.7	316.7	182.9	429.2	348	357.4	416.3	286	439.1	398	3	913.149	6.79	0.00619	46.5546	7.779e-05	1.332e-09	4.77
598	High	[K].NYLDAQYYGEIGIGTPPQK.[F]	1xTMTpro [K19]; 1xTMTpro [N-Term]	0.000133789	2	2	4	A0A6P6WIC5; A0A6P6VY80	A0A6P6WIC5 [77-95]; A0A6P6VY80 [77-95]	A0A6P6WIC5; A0A6P6VY80	0	2735.45	19	108.7	112.6	116.4	89.7	119.1	90.9	105.3	96.9	104.3	121.3	92.7	104.2	356.4	516.3	569.5	457.7	298.2	586.9	551.8	542	608.5	432.6	573.1	507.6	3	912.497	8.43	0.00769	44.5551	7.779e-05	8.434e-10	4.68
599	High	[K].NYKETAGQETVK.[L]	2xTMTpro [K3; K12]; 1xTMTpro [N-Term]	0.000133789	1	1	1	A0A6P6VUV3	A0A6P6VUV3 [177-188]	A0A6P6VUV3	1	2280.3	12	100.5	95.1	97.5	109.1	140.9	103.3	99.5	99.2	112.2	120.7	93.2	70.1	286.3	379.1	414.4	483.8	306.6	579.6	452.9	482.3	568.9	374	501	296.9	3	760.777	6.17	0.00469	17.3609	7.779e-05	8.171e-08	4.2
600	High	[R].NYGLLYPDGSPVYR.[I]	1xTMTpro [N-Term]	0.000133789	1	1	2	A0A6P6TZ47	A0A6P6TZ47 [334-347]	A0A6P6TZ47	0	1918	14	107.8	123.1	109.3	75.9	68.2	89.9	118.5	121.3	111.7	57.3	102	82.3	195.1	311.8	295.2	213.9	94.3	320.8	343	374.5	360	112.8	348.4	221.4	2	959.515	10.63	0.01019	41.6243	7.779e-05	1.315e-06	3.83
601	High	[K].NYGFLPLIGEGTTK.[I]	1xTMTpro [K14]; 1xTMTpro [N-Term]	0.000133789	1	1	1	A0A6P6UWN6	A0A6P6UWN6 [239-252]	A0A6P6UWN6	0	2118.21	14	81.2	97.1	98.2	104.3	149.5	106.4	95.1	101.3	87	123.8	116.5	132.4	54.3	90.9	98.1	108.7	76.4	140.3	101.7	115.7	103.7	90.1	147	131.7	3	706.746	6.32	0.00446	49.3193	7.779e-05	9.035e-07	3.5
602	High	[R].NYFAFTPLLPSVTSGTVEPR.[S]	1xTMTpro [N-Term]	0.000133789	1	1	2	A0A6P6W9F3	A0A6P6W9F3 [93-112]	A0A6P6W9F3	0	2500.34	20	91.4	124.1	108.8	102.1	81.4	110.9	108.1	114.7	108.4	97.3	126.6	99.6	65	123.4	115.4	113	44.2	155.4	122.9	139.1	137.2	75.3	169.8	105.2	3	834.125	7.9	0.00659	52.2188	7.779e-05	9.509e-09	4.22
603	High	[K].NYELPDGQVITIGNER.[F]	1xTMTpro [N-Term]	0.000133789	1	2	3	A0A6P6TGY8	A0A6P6TGY8 [241-256]	A0A6P6W3P9; A0A6P6TGY8	0	2122.11	16	71.3	86	90.6	85.3	64.2	96.2	92.5	95.2	93.5	74.4	100.7	86.3	105.1	177.3	199.2	195.7	72.2	279.4	217.8	239.2	245.3	119.3	279.9	188.9	2	1061.57	6.19	0.00657	43.3475	7.779e-05	1.63e-06	3.34
604	High	[K].NYDISLEVLIKPAGQEDSFVITR.[S]	1xTMTpro [K11]; 1xTMTpro [N-Term]	0.000133789	2	2	2	A0A6P6UAI6; A0A6P6UDD7	A0A6P6UAI6 [298-320]; A0A6P6UDD7 [298-320]	A0A6P6UAI6; A0A6P6UDD7	0	3215.78	23	65	80.4	74.7	89.6	101.1	108.5	116.6	111.3	124.5	166.2	142.1	121.5	334.1	578.5	573.3	717.5	397.1	1099.6	958.4	976.7	1139.5	929.5	1378.2	928.1	3	1072.61	10.21	0.01094	49.8509	7.779e-05	1.478e-18	4.66
605	High	[K].NYDASVFETTIR.[V]	1xTMTpro [N-Term]	0.000133789	1	2	1	A0A6P6X4F1	A0A6P6X4F1 [187-198]	A0A6P6X4F1; A0A6P6XI67	0	1719.89	12	94.1	122.2	103.3	82.5	63.6	86.1	98.6	94.3	93.2	56.4	102.9	75.5	201.9	366.9	330.9	275.7	104.2	364.2	338.2	345.4	356.1	131.6	416.8	240.9	2	860.451	4.67	0.00402	38.2902	7.779e-05	3.027e-06	2.77
606	High	[K].NWNYTGLVDAIHNGEGK.[C]	1xTMTpro [K17]; 1xTMTpro [N-Term]	0.000133789	1	1	1	A0A6P6SV03	A0A6P6SV03 [526-542]	A0A6P6SV03	0	2496.31	17	69.9	85.4	78.1	121.8	173.8	123.8	98.9	103.2	100.8	121	119.4	126.8	86.5	147.9	144.2	234.7	164.3	301.9	195.8	218	222.1	162.9	278.7	233.3	3	832.784	10.06	0.00837	43.8402	7.779e-05	2.219e-12	5.8
607	High	[K].NVWPAIAAGK.[V]	1xTMTpro [K10]; 1xTMTpro [N-Term]	0.000133789	1	3	1	A0A6P6VRN4	A0A6P6VRN4 [273-282]	A0A6P6VRN4; A0A6P6VRB7; A0A6P6VQ54	0	1634.99	10	96.4	111.3	91.9	95.9	153.6	120.7	114.1	103.9	106.1	111.6	107	101.2	81.1	131	115.4	125.6	98.7	200.1	153.5	149.1	158.9	102.1	169.8	126.6	3	545.67	4.45	0.00243	43.0977	7.779e-05	0.0002076	2.91
608	High	[R].NVVPATEEEAKR.[V]	1xTMTpro [K11]; 1xTMTpro [N-Term]	0.000133789	1	2	1	A0A6P6WX56	A0A6P6WX56 [581-592]	A0A6P6WX56; A0A6P6WRG3	1	1951.11	12	98.7	110.2	101.4	116.3	85.6	103	112.6	107.6	90.5	74.6	86.8	90.4	208.1	325	319.3	382	137.9	427.9	379.8	387.3	339.8	171.2	345.4	283.3	3	651.045	5.12	0.00333	17.0192	7.779e-05	2.805e-06	4.69
609	High	[R].NVVIPYVEQYSK.[Y]	1xTMTpro [K12]; 1xTMTpro [N-Term]	0.000133789	1	2	2	A0A6P6VFG4	A0A6P6VFG4 [258-269]	A0A6P6SD26; A0A6P6VFG4	0	2047.17	12	100.2	109.6	107.7	86.1	92	93	89.6	93.3	89.8	102.4	104	93.3	381.7	584	612.2	510.6	267.7	698.1	545.6	606.1	609.2	424.5	747.6	528.3	2	1024.1	5.47	0.0056	44.4748	7.779e-05	1.928e-07	3.87
610	High	[R].NVVIEQSWGAPK.[V]	1xTMTpro [K12]; 1xTMTpro [N-Term]	0.000133789	1	2	2	A0A6P6WUB2	A0A6P6WUB2 [68-79]	A0A6P6WUB2; A0A6P6WT68	0	1936.11	12	89.1	83	89.2	107.1	149	120.8	107	102.3	109.5	130.3	113.8	107.6	107.4	139.9	160.5	201.1	137.1	286.9	206.1	210.4	235	170.9	258.6	192.8	2	968.57	8.9	0.00862	38.7603	7.779e-05	2.6e-08	4.12
611	High	[R].NVVDGSTTFHSATVAAVGER.[F]	1xTMTpro [N-Term]	0.000133789	2	2	1	A0A6P6X4A5; A0A6P6XCT9	A0A6P6X4A5 [344-363]; A0A6P6XCT9 [344-363]	A0A6P6X4A5; A0A6P6XCT9	0	2322.2	20	120.2	133.1	118	112.7	50.4	95.8	98.7	111.1	112.7	85.3	94.3	82.9	46.2	71.6	67.7	67.5	14.8	72.6	60.7	72.9	77.2	35.7	68.4	47.4	3	774.744	7.54	0.00584	26.8491	7.779e-05	2.316e-12	6.86
612	High	[R].NVVAVELINR.[Q]	1xTMTpro [N-Term]	0.000133789	1	2	1	A0A6P6U1H0	A0A6P6U1H0 [87-96]	A0A6P6U1H0; A0A6P6TQN4	0	1430.87	10	92.7	141.2	118.7	96.8	85.9	106.5	127.1	119.6	116.9	75.5	141	91.8	81.5	173.6	155.8	132.5	57.7	184.5	178.6	179.4	183	72.2	233.8	119.9	2	715.942	7.68	0.0055	38.7832	7.779e-05	7.379e-05	2.71
613	High	[K].NVVATDTSPK.[Q]	1xTMTpro [K10]; 1xTMTpro [N-Term]	0.000133789	1	4	1	A0A6P6SJJ3	A0A6P6SJJ3 [57-66]	A0A6P6STD1; A0A6P6SJJ3; A0A6P6SUW8; A0A6P6SKK1	0	1639.95	10	88.4	103.7	85.7	85	79.3	90.4	106.4	109.1	98	78.1	95.1	83.8	142	232.9	205.3	212.5	97.2	286.1	273.1	299	280.2	136.4	288	200.1	2	820.485	7.62	0.00625	19.9145	7.779e-05	0.0001072	3.03
614	High	[R].NVTVTTADESKPER.[H]	1xTMTpro [K11]; 1xTMTpro [N-Term]	0.000133789	1	16	1	A0A6P6VGD7	A0A6P6VGD7 [176-189]	A0A6P6VGD7; A0A6P6VGD2; A0A6P6VJF1; A0A6P6VJE7; A0A6P6VGF0; A0A6P6VGG0; A0A6P6VHN5; A0A6P6VHP0; A0A6P6VH96; A0A6P6VGE4; A0A6P6VHP6; A0A6P6VHN0; A0A6P6VJE2; A0A6P6VGE2; A0A6P6VGE7; A0A6P6VHA0	0	2155.19	14	78.3	89.8	95.1	88.9	90.5	90.9	119	124.9	132.6	155.8	144.9	120.6	74.4	119.3	134.9	131.5	65.7	170.1	180.8	202.5	224.3	161.1	259.6	170.3	3	719.072	7.99	0.00574	16.3937	7.779e-05	1.808e-14	4.68
615	High	[K].NVTDYIVDIITKR.[A]	1xTMTpro [K12]; 1xTMTpro [N-Term]	0.000133789	1	2	1	A0A6P6UGT2	A0A6P6UGT2 [305-317]	A0A6P6UAR0; A0A6P6UGT2	1	2158.27	13	70.5	93.6	77.1	99.7	97.5	104.8	109.5	107.8	104.2	103.6	110.8	82.7	84.5	156.8	137.9	186.1	89.2	247.3	209.8	220.4	222.2	135	250.3	147.3	3	720.101	6.71	0.00483	52.3536	7.779e-05	6.643e-08	3.75
616	High	[R].NVSQQQQATNPADQLASLSLNDGLVS.[-]	1xTMTpro [N-Term]	0.000133789	1	2	1	A0A6P6WBY2	A0A6P6WBY2 [628-653]	A0A6P6WBY2; A0A6P6VTZ6	0	3002.53	26	122.2	141.4	153.7	92.8	143.2	99.8	84.7	87.9	89.8	101.2	90.4	85.5	85.7	138.7	160.9	101.3	76.7	137.9	95	105.2	112.1	77.2	119.6	89.1	3	1001.53	8.87	0.00888	49.3136	7.779e-05	7.657e-07	4.81
617	High	[R].NVSQQQQAANPADQLASLSLNDGLVS.[-]	1xTMTpro [N-Term]	0.000133789	1	1	1	A0A6P6VSD8	A0A6P6VSD8 [630-655]	A0A6P6VSD8	0	2972.52	26	102.5	100.1	87.3	74.7	99.7	89	90.2	83.2	90.5	78.8	76	61.2	84.3	115.2	107.2	95.7	62.6	144.2	118.6	116.8	132.5	70.5	117.9	74.8	3	991.52	6.72	0.00666	49.3335	7.779e-05	0.0001377	4.48
618	High	[K].NVQAISTNSEKDTPLQK.[Y]	2xTMTpro [K11; K17]; 1xTMTpro [N-Term]	0.000133789	1	2	3	A0A6P6TTY0	A0A6P6TTY0 [283-299]	A0A6P6TTY0; A0A6P6U377	1	2785.59	17	66	73.7	75.9	157	258.2	174.7	93.4	98.3	103.5	76	72.8	56.3	131.9	206.2	226.6	489.2	394.4	688.5	298.7	335.3	368.6	165.4	274.5	167.5	3	929.206	6.08	0.00565	27.9725	7.779e-05	2.432e-11	4.31
619	High	[R].NVPVIETGNSSIR.[N]	1xTMTpro [N-Term]	0.000133789	1	3	1	A0A6P6VBY7	A0A6P6VBY7 [237-249]	A0A6P6V3P6; A0A6P6VBY7; A0A6P6V3I8	0	1689.95	13	92	114.5	100.4	84.1	32	96.8	96.2	92.7	91.4	50.8	166.3	79.2	169.9	295.8	276.7	241.8	45.2	352.2	284.1	292.1	300.6	102.1	579.3	217.5	2	845.484	8.97	0.00758	28.7273	7.779e-05	0.000122	2.87
620	High	[R].NVPLQASMTVTDEPGYYEDGNFGIR.[L]	1xTMTpro [N-Term]	0.000133789	1	3	1	A0A6P6T7H6	A0A6P6T7H6 [540-564]	A0A6P6T871; A0A6P6T7H6; A0A6P6T7P8	0	3077.48	25	90.3	89.9	96.6	91.6	86.6	112.5	107.8	107.7	99.9	85.1	93.1	85.5	105.8	147.5	169	167.2	77.5	259.8	202.1	215.4	208.6	108.5	205.9	149	3	1026.51	9.7	0.00995	45.1016	7.779e-05	1.198e-05	3.1
621	High	[K].NVNLPGVVVDLPTLTEK.[D]	1xTMTpro [K17]; 1xTMTpro [N-Term]	0.000133789	1	3	1	A0A6P6V6Z2	A0A6P6V6Z2 [177-193]	A0A6P6V6Z2; A0A6P6V140; A0A6P6V155	0	2416.43	17	61.9	88.5	103.4	106.4	145.8	122.7	124	118.8	115.9	161.3	125.3	139.6	11.4	22.8	28.4	30.5	20.5	44.5	36.5	37.3	38	32.3	43.5	38.2	3	806.153	6.17	0.00497	50.8078	7.779e-05	2.992e-05	3.47
622	High	[K].NVNLPGVIVDLPTLTEK.[D]	1xTMTpro [K17]; 1xTMTpro [N-Term]	0.000133789	1	3	1	A0A6P6T2U4	A0A6P6T2U4 [176-192]	A0A6P6SW27; A0A6P6T2U4; A0A6P6SJM2	0	2430.45	17																									3	810.825	5.52	0.00447	52.0794	7.779e-05	1.764e-07	3.42
623	High	[K].NVLVVGGGDGGVLR.[E]	1xTMTpro [N-Term]	0.000133789	1	1	1	A0A6P6VM83	A0A6P6VM83 [146-159]	A0A6P6VM83	0	1615.95	14	101.6	128.5	113.9	97.2	81.2	116.7	116.3	112.5	124	82.2	113.8	97.2	79.9	141.4	133.7	119.1	48.8	180.9	146.3	151	173.7	70.4	168.9	113.7	2	808.483	8.56	0.00692	38.4495	7.779e-05	8.607e-07	3.17
624	High	[K].NVLVDSENR.[S]	1xTMTpro [N-Term]	0.000133789	1	1	2	A0A6P6T1H0	A0A6P6T1H0 [164-172]	A0A6P6T1H0	0	1349.73	9	101.6	117.6	107.6	90.3	70.2	95	112.7	103	99.1	57.4	104.2	84	187.3	303.2	296	259.4	98.8	345	332.1	324	325.2	115.1	362.3	230.2	2	675.376	8.15	0.0055	18.4914	7.779e-05	0.0003287	2.07
625	High	[K].NYPVLEGGPR.[S]	1xTMTpro [N-Term]	0.000133789	1	2	1	A0A6P6SRC1	A0A6P6SRC1 [249-258]	A0A6P6SRC1; A0A6P6T383	0	1405.78	10	132.3	157.5	139.9	91.1	62.1	108.2	111.6	118.5	122.3	68.2	106.1	78.7	88.5	147.4	139.6	94.9	31.7	142.6	119.3	135.2	145.7	49.6	133.9	78.2	2	703.396	6.81	0.00478	25.9637	7.779e-05	0.0003075	2.63
626	High	[R].QDISSFESGQIYDQADAAGFIR.[L]	1xTMTpro [N-Term]	0.000133789	1	2	1	A0A6P6UGN0	A0A6P6UGN0 [450-471]	A0A6P6UGN0; A0A6P6U8S5	0	2722.33	22	117.1	139.8	151.6	84.7	101.2	74.3	81.5	76	80.4	67.6	64.5	60.1	198.8	332.2	384.3	223.9	131.2	248.7	221.2	220.3	243.2	124.9	206.6	151.6	3	908.121	7.9	0.00717	45.5106	7.779e-05	8.25e-08	3.26
627	High	[K].NYVDMDEYPVTTELQNR.[C]	1xTMTpro [N-Term]	0.000133789	3	5	1	A0A6P6TLY4; A0A6P6TAU0; A0A6P6XAE4	A0A6P6TLY4 [83-99]; A0A6P6TAU0 [83-99]; A0A6P6XAE4 [83-99]	A0A6P6TLY4; A0A6P6UYZ2; A0A6P6TAU0; A0A6P6XGT0; A0A6P6XAE4	0	2391.15	17	101.3	111.6	109.8	88.8	85.8	102.6	104.7	102.3	111.6	95	108	87.2	100.7	155.1	162.8	137.5	65.1	201	166.4	173.5	197.5	102.7	202.5	128.8	3	797.729	11.47	0.00915	41.2105	7.779e-05	8.426e-07	3.59
628	High	[R].QAEQLLVNDSSR.[V]	1xTMTpro [N-Term]	0.000133789	2	2	2	A0A6P6U4X0; A0A6P6TUF7	A0A6P6U4X0 [131-142]; A0A6P6TUF7 [103-114]	A0A6P6U4X0; A0A6P6TUF7	0	1663.89	12	117.3	113.8	86.5	110.9	48.5	101.3	134.3	132.5	105.1	58.6	133.8	114.2	223.8	303.8	246.3	329.6	70.7	380.8	409.9	431.3	357.2	121.6	481.5	323.9	2	832.455	5.9	0.00491	25.9409	7.779e-05	2.852e-08	3.67
629	High	[K].QDLPNAMNAAEITDK.[L]	1xTMTpro [K15]; 1xTMTpro [N-Term]	0.000133789	1	3	2	A0A6P6T750	A0A6P6T750 [128-142]	A0A6P6T750; A0A6P6V4W9; A0A6P6VZH0	0	2239.19	15	78.9	88	99.4	116.9	134.5	121.3	94.6	99.5	108.3	126	112.4	134.4	228.3	356.6	429.7	527.2	297.5	692.3	437.7	491.6	558.2	396.9	613.9	578.6	2	1120.1	3.11	0.00348	39.1883	7.779e-05	1.977e-12	6.67
630	High	[R].QDIIVSNSEDK.[S]	1xTMTpro [K11]; 1xTMTpro [N-Term]	0.000133789	1	2	4	A0A6P6UPC4	A0A6P6UPC4 [260-270]	A0A6P6UPC4; A0A6P6URT7	0	1856.03	11	91.8	100	102.2	97.2	106.7	95.6	93.8	100	99.6	109.2	102.4	99.4	360.7	549.9	599.2	595	320.3	740.2	589.3	670.2	697.1	466.9	759.1	580.7	2	928.522	5.86	0.00544	24.0029	7.779e-05	1.592e-07	3.62
631	High	[K].QDLAHALVLEK.[DE]	1xTMTpro [K11]; 1xTMTpro [N-Term]	0.000133789	1	3	1	A0A6P6X065	A0A6P6X065 [221-231]	A0A6P6X065; A0A6P6WKB4; A0A6P6X067	0	1845.11	11	79.3	82.1	90.3	98.4	123	94.7	89	85.8	97.9	120.9	98.1	125.7	132.1	191.2	224.5	255.3	156.5	310.7	236.9	243.8	290.4	219	308.1	311.1	3	615.712	6.04	0.00371	40.1314	7.779e-05	1.817e-06	3.73
632	High	[R].QDKTEPPVEGR.[L]	1xTMTpro [K3]; 1xTMTpro [N-Term]	0.000133789	2	2	2	A0A385CHN3; A0A6P6W0Y9	A0A385CHN3 [120-130]; A0A6P6W0Y9 [120-130]	A0A385CHN3; A0A6P6W0Y9	1	1864.04	11	98	88.3	90.1	117.5	80.2	82.6	105.6	105.3	90	82	99.5	116.3	286.9	361.4	393.7	535.5	179.3	476.5	493.9	526	469.3	261.2	549.2	506.1	3	622.022	5.81	0.00361	12.8687	7.779e-05	4.63e-05	2.9
633	High	[K].QDFGTIDILVHSLANGPEVSKPLLETSR.[N]	1xTMTpro [K21]; 1xTMTpro [N-Term]	0.000133789	1	1	1	A0A6P6SQ66	A0A6P6SQ66 [200-227]	A0A6P6SQ66	0	3645.01	28	98	107	104.9	101	128.9	104.3	99.3	90.2	98	117.8	112.1	109.8	141.3	215.9	225.8	226.7	141.9	296.4	228.9	221.9	251.5	184.8	305	235.2	4	912.013	4.82	0.00439	51.8488	7.779e-05	4.026e-13	7.92
634	High	[R].QDESLFEAGVAR.[E]	1xTMTpro [N-Term]	0.000133789	1	2	2	A0A6P6XFB7	A0A6P6XFB7 [401-412]	A0A6P6XFB7; A0A6P6XAR4	0	1625.85	12	100.6	112.1	111.9	97.9	106.2	109.6	99.3	104.7	113.9	83.9	98.3	91.7	281.5	438.7	467.3	426.9	226.9	604.5	444.1	499.8	567.5	255.5	518.9	381.6	2	813.428	1.86	0.00151	31.0194	7.779e-05	1.019e-06	3.28
635	High	[R].QCSSGLQAVADVAAAIK.[A]	1xCarbamidomethyl [C2]; 1xTMTpro [K17]; 1xTMTpro [N-Term]	0.000133789	1	2	1	A0A6P6WNB8	A0A6P6WNB8 [139-155]	A0A6P6WWA9; A0A6P6WNB8	0	2297.28	17	81.5	87.5	92.9	77.4	96.8	76.9	76.4	76.4	73.6	100.3	75.8	76.4	108.8	163.5	185.1	160.9	98.7	202.2	163.1	174	175	145.7	191	151.5	3	766.435	5.46	0.00418	48.9645	7.779e-05	3.43e-09	3.6
636	High	[R].QCLNDCFELYSDAIDTMK.[Q]	2xCarbamidomethyl [C2; C6]; 1xOxidation [M17]; 1xTMTpro [K18]; 1xTMTpro [N-Term]	0.000133789	1	2	1	A0A6P6VU66	A0A6P6VU66 [100-117]	A0A6P6VU66; A0A6P6WEE4	0	2847.35	18	93.6	89.8	97.4	73.1	94.4	80	89	92.3	98.7	120.4	81.5	82.8	70.2	94.2	109.1	85.4	54.1	118.3	106.7	118.1	131.9	98.3	115.4	92.3	3	949.794	6.71	0.00636	45.3873	7.779e-05	2.056e-05	2.64
637	High	[R].QCLIYDKPDDDGK.[L]	1xCarbamidomethyl [C2]; 2xTMTpro [K7; K13]; 1xTMTpro [N-Term]	0.000133789	1	2	3	A0A6P6WRT6	A0A6P6WRT6 [73-85]	A0A6P6WRT6; A0A6P6WS14	0	2479.33	13	98.6	104.3	122.6	105.7	100.5	108.1	84.5	82	98.7	107.3	92.4	120.9	383.2	567.1	711.2	639.5	298.1	827.5	524.7	543.4	682.6	453.6	677.5	698.4	3	827.121	6.87	0.00568	29.6169	7.779e-05	2.022e-07	3.85
638	High	[R].QAYDNYGK.[S]	1xTMTpro [K8]; 1xTMTpro [N-Term]	0.000133789	1	1	1	A0A6P6UP18	A0A6P6UP18 [65-72]	A0A6P6UP18	0	1566.84	8	106.1	109.8	107.7	87.9	85.7	85.5	88.7	100.1	104.4	95.5	91.1	88.5	242.1	350.3	366.8	312.5	149.4	384.6	323.7	389.6	424.3	237.1	392.2	300.1	2	783.93	7.15	0.0056	17.6332	7.779e-05	0.0002035	3.14
639	High	[R].QAVVEELVTDPLSGEK.[V]	1xTMTpro [K16]; 1xTMTpro [N-Term]	0.000133789	1	1	1	A0A6P6WDY1	A0A6P6WDY1 [223-238]	A0A6P6WDY1	0	2322.3	16	122.2	89.9	96.6	115.8	135.7	94.7	84.6	87.6	74.4	124.1	88.2	144.2	70.6	72.7	83.3	104.2	59.9	107.9	78.2	86.4	76.6	78	96.1	123.9	3	774.78	9.16	0.00709	47.884	7.779e-05	5.51e-07	4.48
640	High	[R].QAVTNPNNTLFGTK.[R]	1xTMTpro [K14]; 1xTMTpro [N-Term]	0.000133789	1	2	1	A0A6P6VSY4	A0A6P6VSY4 [112-125]	A0A6P6VSY4; A0A6P6WBC6	0	2113.19	14	53.4	80.6	73.2	91.9	94.1	111.9	102.5	101.6	91.9	105.8	102.1	102.5	36.9	78	75.5	99	49.7	152.4	113.3	119.8	113.2	79.6	133.1	105.3	3	705.072	5.41	0.00381	35.6872	7.779e-05	0.0001224	3.23
641	High	[R].QAVSVEESLWR.[S]	1xTMTpro [N-Term]	0.000133789	1	2	1	A0A6P6WPD0	A0A6P6WPD0 [98-108]	A0A6P6WPD0; A0A6P6WP84	0	1607.87	11																									2	804.444	5.94	0.00477	39.1065	7.779e-05	2.601e-06	2.56
642	High	[R].QATQQQPSSSSDNGNTR.[T]	1xTMTpro [N-Term]	0.000133789	1	1	2	A0A6P6UQJ7	A0A6P6UQJ7 [96-112]	A0A6P6UQJ7	0	2110.01	17	128.9	166	128.1	110		116.4	175.4	180.9	156.6	76.8	219.9	141	9.1	16.4	13.5	12.1		16.2	19.8	21.8	19.7	5.9	29.3	14.8	3	704.011	5.1	0.00359	7.9747	7.779e-05	3.225e-07	3.76
643	High	[R].QATNQALQLLQDNYPEFVAK.[Q]	1xTMTpro [K20]; 1xTMTpro [N-Term]	0.000133789	2	2	1	A0A6P6UPC1; A0A6P6UX36	A0A6P6UPC1 [428-447]; A0A6P6UX36 [428-447]	A0A6P6UPC1; A0A6P6UX36	0	2899.58	20	90	108.5	109.5	83.7	147.9	99.1	96.3	95.7	90	133.8	102.4	97.8	109.3	184.3	198.5	158.3	137.1	237	186.9	198.3	194.7	176.8	234.6	176.5	3	967.203	4.86	0.00469	49.295	7.779e-05	2.475e-11	5.37
644	High	[K].QASPETWVDMVNDFQK.[G]	1xTMTpro [K16]; 1xTMTpro [N-Term]	0.000133789	1	2	1	A0A6P6SI03	A0A6P6SI03 [93-108]	A0A6P6SI03; A0A6P6SGB2	0	2503.28	16	82.5	101	122.4	99	132.1	116	83.2	87.3	101	162.9	106.6	111.6	31.9	54.6	70.6	59.6	39	88.4	51.4	57.6	69.5	68.5	77.7	64.1	3	835.103	5.91	0.00493	49.5054	7.779e-05	4.106e-06	3.6
645	High	[K].QASDAATDAAKK.[I]	2xTMTpro [K11; K12]; 1xTMTpro [N-Term]	0.000133789	1	1	3	A0A6P6X4N6	A0A6P6X4N6 [106-117]	A0A6P6X4N6	1	2089.21	12	149.2	84.9	77.3	132.5	93	83.6	124	123.5	83.7	69	77.9	90.1	386.4	307.5	298.7	534.5	184	426.8	513.6	545.7	386	194.6	380.5	347	3	697.078	5.81	0.00405	14.8059	7.779e-05	4.308e-11	3.27
646	High	[K].QASDAATDAAK.[K]	1xTMTpro [K11]; 1xTMTpro [N-Term]	0.000133789	1	1	3	A0A6P6X4N6	A0A6P6X4N6 [106-116]	A0A6P6X4N6	0	1656.9	11	134.2	93.8	84.7	158.2	76.1	83.4	131.9	130.4	81.5	57.9	88.5	114.9	348.1	340.7	327.9	639.3	150.8	426.3	547.3	577.2	376.4	163.6	433.1	443.1	2	828.961	6.19	0.00513	13.8076	7.779e-05	1.307e-07	3.25
647	High	[K].QAQAITEVSGR.[L]	1xTMTpro [N-Term]	0.000133789	1	1	1	A0A6P6WDY1	A0A6P6WDY1 [278-288]	A0A6P6WDY1	0	1463.81	11	91.7	133.4	122.1	108.3	62.8	110	115.9	128.3	98	63.3	134.1	109.1	63.6	129.5	126.5	117.1	33.3	150.5	128.6	151.9	121.1	47.8	175.6	112.5	2	732.416	7.37	0.00539	17.7913	7.779e-05	2.416e-07	2.79
648	High	[K].QAPLLPQDPYER.[A]	1xTMTpro [N-Term]	0.000133789	1	3	2	A0A6P6WQW1	A0A6P6WQW1 [82-93]	A0A6P6WTQ8; A0A6P6WQW1; A0A6P6WXP2	0	1730.94	12	86.6	110.7	97.5	89.2	68.5	99.2	118.5	121.1	120.3	86	159.5	138.4	72	128.7	120.9	115.5	43.5	162.5	157.5	171.7	178	77.8	250.1	170.9	3	577.655	6.92	0.00399	33.136	7.779e-05	2.502e-05	3.09
649	High	[K].QAIVGPVNTPRPGVFYQR.[D]	1xTMTpro [N-Term]	0.000133789	2	2	1	A0A6P6U4B8; A0A6P6TMV0	A0A6P6U4B8 [78-95]; A0A6P6TMV0 [35-52]	A0A6P6U4B8; A0A6P6TMV0	0	2303.29	18	81.5	105.1	94	108.3	63.4	107.7	108.9	110.6	113	69.1	191.7	114.6	47.8	86.2	82.3	98.9	28.4	124.5	102.1	110.7	118	44.1	212.1	99.9	3	768.442	7.44	0.00572	33.4092	7.779e-05	4.68e-07	3.54
650	High	[R].QAISNAGGGEEAANSSER.[V]	1xTMTpro [N-Term]	0.000133789	1	2	2	A0A6P6XF31	A0A6P6XF31 [48-65]	A0A6P6XF31; A0A6P6XC01	0	2051.99	18	76.5	104.2	89.4	128.7	27.9	144.6	102.6	111.3	106.5	45.1	148	109	191.6	365.1	334.2	502	53.4	713.8	410.7	475.4	475.1	122.9	699.2	405.7	2	1026.5	4.86	0.00498	12.1825	7.779e-05	2.864e-13	4.43
651	High	[R].QAIHAESVNVADTWELCTGR.[I]	1xCarbamidomethyl [C17]; 1xTMTpro [N-Term]	0.000133789	1	2	1	A0A6P6WCL7	A0A6P6WCL7 [371-390]	A0A6P6WCL7; A0A6P6WDL7	0	2561.27	20	87.8	122.6	99.2	82.1	60.2	92.4	101.7	95.2	97.4	75.6	97.6	77.6	110.3	215.4	185.9	160.5	57.7	228.6	204.1	203.9	217.8	103.3	231.1	144.8	3	854.436	7.3	0.00623	36.2025	7.779e-05	5.183e-12	5.36
652	High	[R].QAIEEFSADATR.[F]	1xTMTpro [N-Term]	0.000133789	1	1	2	A0A6P6WUP1	A0A6P6WUP1 [732-743]	A0A6P6WUP1	0	1641.84	12	96.5	116.4	115.2	107.9	66.7	149.6	118.6	110.9	125.1	72.9	111.9	98.4	93.2	157.3	166	162.3	49.2	284.7	183.2	182.7	215.1	76.6	203.9	141.2	2	821.429	6.13	0.00503	31.1128	7.779e-05	1.582e-06	3.32
653	High	[R].QAGSEFSEDKFVAK.[V]	2xTMTpro [K10; K14]; 1xTMTpro [N-Term]	0.000133789	1	3	1	A0A6P6VE11	A0A6P6VE11 [146-159]	A0A6P6STK2; A0A6P6VE11; A0A6P6STQ9	1	2455.36	14	90.8	98.5	100.1	90.9	100.2	100.2	91.7	92.1	101.1	96.9	99.6	84.8	123.5	187.3	203.1	192.5	104	268.5	199.4	213.6	244.9	143.3	255.4	171.4	3	819.132	7.06	0.00578	33.1592	7.779e-05	8.533e-08	3.82
654	High	[K].QAGIGIIMDADATTALR.[K]	1xTMTpro [N-Term]	0.000133789	1	1	1	A0A6P6V5B4	A0A6P6V5B4 [464-480]	A0A6P6V5B4	0	2021.1	17																									3	674.38	12.13	0.00817	46.6163	7.779e-05	0.0004201	2.91
655	High	[K].QAFDEAISELDTLGEESYK.[D]	1xTMTpro [K19]; 1xTMTpro [N-Term]	0.000133789	2	2	2	A0A6P6V1A1; A0A6P6V7M4	A0A6P6V1A1 [198-216]; A0A6P6V7M4 [198-216]	A0A6P6V1A1; A0A6P6V7M4	0	2753.4	19	87.6	96.8	115.1	97.8	121.2	115.1	97.1	98.8	108	129.5	97.8	133.6	66.5	102.9	130.5	115.7	70.3	172.3	117.9	128	146.1	107	140.1	150.8	3	918.477	5.23	0.0048	52.6703	7.779e-05	3.785e-10	4.59
656	High	[K].QAFDEAIAELDTLGEESYK.[D]	1xTMTpro [K19]; 1xTMTpro [N-Term]	0.000133789	3	4	3	A0A6P6UWQ6; A0A6P6TJN8; A0A6P6T9G5	A0A6P6UWQ6 [203-221]; A0A6P6TJN8 [201-219]; A0A6P6T9G5 [201-219]	A0A6P6UWQ6; A0A6P6TJN8; A0A6P6ULR2; A0A6P6T9G5	0	2737.41	19	73	88.9	102.9	106	111.3	113.3	83.7	94.2	106.1	119.5	104.3	156.1	39.7	67.6	83.5	89.7	46.2	121.4	72.7	87.4	102.7	70.7	106.9	126.1	3	913.149	9.84	0.00898	53.8562	7.779e-05	1.832e-10	5.26
657	High	[K].QAFDEAIAELDTLGEDSYK.[D]	1xTMTpro [K19]; 1xTMTpro [N-Term]	0.000133789	1	2	1	A0A6P6WBG7	A0A6P6WBG7 [205-223]	A0A6P6WBG7; A0A6P6VUM6	0	2723.39	19	76.3	88.2	86.9	113.7	83.7	110.9	100.3	105.1	94.8	132	117.3	131.5	29	46.9	49.3	67.3	24.3	83.1	61	68.2	64.2	54.6	84.1	74.3	3	908.479	11.52	0.01046	53.4736	7.779e-05	0.0001843	1.41
658	High	[K].QACLGNCSCK.[A]	3xCarbamidomethyl [C3; C7; C9]; 1xTMTpro [K10]; 1xTMTpro [N-Term]	0.000133789	2	4	2	A0A6P6SG38; A0A6P6S7X5	A0A6P6SG38 [395-404]; A0A6P6S7X5 [395-404]	A0A6P6SG38; A0A6P6SE95; A0A6P6S7X5; A0A6P6S6Y1	0	1805.9	10	89	85.5	71.5	112.8	138.7	109.9	102.4	113.3	101.7	65.3	78.2	65.6	132.5	178.1	158.9	261.5	157.7	322.3	243.6	287.7	269.7	105.7	219.6	145.1	2	903.457	6	0.00542	15.4313	7.779e-05	2.858e-06	3.64
659	High	[R].NVIHGSDGVESAR.[K]	1xTMTpro [N-Term]	0.000133789	1	1	3	A0A6P6WE87	A0A6P6WE87 [112-124]	A0A6P6WE87	0	1644.86	13	108.5	131.3	106.6	90.5	59.6	85.6	109.7	110.9	99.8	69.4	103.9	96.3	231.9	392.5	340.1	301.4	97.3	360.6	374.8	404.5	379.9	161.3	418.7	305.9	2	822.94	6.32	0.00519	12.9286	7.779e-05	1.446e-07	3
660	High	[K].QGQLIIVPQYFAVIK.[K]	1xTMTpro [K15]; 1xTMTpro [N-Term]	0.000133789	1	1	7	A0A6P6WMC4	A0A6P6WMC4 [399-413]	A0A6P6WMC4	0	2325.42	15	59.4	76.8	63	61.2	57.8	59.2	71.7	69.5	76.7	201.5	281.7	273.9	232.8	421.6	368.8	373.7	173.2	457.7	449.7	464.9	535.7	859.9	2084	1596.9	2	1163.22	5.25	0.0061	52.4702	7.779e-05	4.158e-08	4.93
661	High	[K].QGSAPAQAAASK.[L]	1xTMTpro [K12]; 1xTMTpro [N-Term]	0.000133789	1	2	2	A0A6P6W5R2	A0A6P6W5R2 [111-122]	A0A6P6W5R2; J7FPQ8	0	1694.97	12	76	84.8	68.5	103	108.5	89	122.3	134.3	116.2	111.8	118.8	125.9	106.8	166.6	143.7	225.4	116.4	246.3	274.7	321.9	290.7	170.8	314.9	262.8	2	847.992	5.38	0.00456	13.7664	7.779e-05	1.652e-08	3.9
662	High	[R].QPNGEDMGNFYSAGR.[D]	1xTMTpro [N-Term]	0.000133789	1	2	4	A0A6P6SDS1	A0A6P6SDS1 [337-351]	A0A6P6SDS1; A0A6P6SDQ3	0	1946.9	15	101.6	142	149	70.9	41	82.4	97.4	110.6	112.7	85.5	117.2	107.6	136.6	267.3	299.1	148.6	42.1	218.5	209.5	253.9	270	125.2	297.3	215.2	2	973.959	5.84	0.00569	25.9279	7.779e-05	9.404e-07	3.62
663	High	[R].QPNGEDLGNFYSAGR.[D]	1xTMTpro [N-Term]	0.000133789	1	2	1	A0A6P6SFS2	A0A6P6SFS2 [339-353]	A0A6P6SD00; A0A6P6SFS2	0	1928.94	15	103.7	110.7	110.7	70.4	51.2	77.4	107.3	98.4	92.9	64.7	105.7	104	111	165.9	176.9	117.4	41.9	163.3	183.8	179.8	177.1	75.4	213.5	165.5	2	964.981	6.84	0.0066	30.6196	7.779e-05	6.486e-07	2.78
664	High	[R].QPISESEIR.[E]	1xTMTpro [N-Term]	0.000133789	1	2	1	A0A6P6WEL9	A0A6P6WEL9 [33-41]	A0A6P6WEL9; A0A6P6VUP3	0	1362.75	9	120.2	110.1	116	122.4	61.7	120.2	125.1	124.1	129	65.2	112.4	99.1	82.7	106	119.1	131.1	32.4	162.9	137.6	145.7	158	48.8	145.8	101.3	2	681.886	7.52	0.00513	18.1357	7.779e-05	0.000126	2.41
665	High	[R].QPIISTGFGEVSGVR.[V]	1xTMTpro [N-Term]	0.000133789	1	1	11	A0A6P6T6X1	A0A6P6T6X1 [49-63]	A0A6P6T6X1	0	1851.03	15	116.9	119.5	118.8	93.6	80.2	105.7	109.4	108.7	110.7	77.7	97.8	80.1	828.6	1184.4	1256.1	1032.7	434	1476	1239.4	1314	1397.3	599.5	1307.4	843.5	2	926.027	8.94	0.00827	41.4332	7.779e-05	6.869e-10	2.99
666	High	[R].QPIISTGFGEVSGVR.[V]		0.000133789	1	1	1	A0A6P6T6X1	A0A6P6T6X1 [49-63]	A0A6P6T6X1	0	1546.82	15																									2	773.919	5.32	0.00412	35.379	7.779e-05	2.801e-05	3.36
667	High	[R].QPLGTAAQTDKDYK.[E]	2xTMTpro [K11; K14]; 1xTMTpro [N-Term]	0.000133789	1	1	2	S4NPP0	S4NPP0 [20-33]	S4NPP0	1	2448.39	14	107.2	91.7	119.1	120.1	102	100.1	68.8	79.9	67.5	90.8	80.4	137.7	373.2	446.5	618.7	651.1	271.1	686.6	383	474.2	418.2	343.8	527.7	712.1	3	816.809	9.13	0.00745	22.8536	7.779e-05	3.258e-10	3.09
668	High	[R].QPLGTAAQTDK.[D]	1xTMTpro [K11]; 1xTMTpro [N-Term]	0.000133789	1	1	2	S4NPP0	S4NPP0 [20-30]	S4NPP0	0	1738	11	102.3	105	103.9	100.1	71.5	89.3	90.4	108.4	87.3	80.1	89.9	121.8	135.9	195.2	206.1	207.3	72.6	233.8	192.1	245.7	206.6	115.8	225.4	240.6	2	869.507	4.85	0.00421	19.3868	7.779e-05	5.99e-06	2.53
669	High	[K].QPGVLQVVESQK.[L]	1xTMTpro [K12]; 1xTMTpro [N-Term]	0.000133789	1	2	2	A0A6P6UPY9	A0A6P6UPY9 [102-113]	A0A6P6UPY9; A0A6P6UPT7	0	1920.14	12	100.8	110.6	102.8	86.3	117.5	91.3	85.1	85	98.6	116.2	87.5	85	226.5	347.7	344.7	302.2	201.6	404.5	305.6	325.9	394.7	284.1	370.8	284	3	640.725	10	0.0064	41.0143	7.779e-05	1.086e-05	3.79
670	High	[R].QPGPIPGINTK.[I]	1xTMTpro [K11]; 1xTMTpro [N-Term]	0.000133789	1	1	2	A0A6P6U8M9	A0A6P6U8M9 [255-265]	A0A6P6U8M9	0	1730.05	11	121.1	122.9	106.8	107.1	118.3	112.6	96.9	91.2	97.1	110.6	119.9	115.1	132.4	187.9	174.2	182.4	98.8	242.6	169.3	170.1	189.1	131.6	247.2	187	2	865.533	8.09	0.007	34.1561	7.779e-05	1.862e-05	2.84
671	High	[R].QPGITSEEDDGYLIFFVHDESTGK.[S]	1xTMTpro [K24]; 1xTMTpro [N-Term]	0.000133789	1	2	1	A0A6P6WF48	A0A6P6WF48 [480-503]	A0A6P6VWG7; A0A6P6WF48	0	3292.65	24	117	86.1	90.8	79.3	152.1	73.3	74.3	82.3	87	165.1	68.6	77.5	366.4	377.4	424.2	386.9	363.7	452.4	372.1	439.5	485.4	562.6	405.4	360.5	3	1098.23	5.55	0.00609	47.529	7.779e-05	4.768e-18	7.36
672	High	[R].QPEGPKPGFMVEGATLETVTPIPYDVVNDLK.[G]	2xTMTpro [K6; K31]; 1xTMTpro [N-Term]	0.000133789	1	1	1	A0A6P6SPD4	A0A6P6SPD4 [131-161]	A0A6P6SPD4	0	4254.32	31	86.2	79.3	101.4	103.1	140	128.8	81.9	89.6	109.1	146.3	103.2	112.4	112	144.3	196.7	208.7	139	330	170.3	198.8	252.5	207	253	217.2	4	1064.34	6.7	0.00713	51.8086	7.779e-05	3.121e-12	6.24
673	High	[K].QPCPQAYSYAYDDR.[S]	1xCarbamidomethyl [C3]; 1xTMTpro [N-Term]	0.000133789	1	1	2	A0A6P6SWV8	A0A6P6SWV8 [207-220]	A0A6P6SWV8	0	2037.93	14	107.2	145.1	141.4	79.2	39.1	82.1	79.4	74	85.5	37.8	63.4	46.4	249	471.3	490	286.4	69.3	375.6	294.9	293.1	353.7	95.4	277.6	160.2	3	679.987	8.47	0.00575	22.901	7.779e-05	1.315e-06	3.39
674	High	[R].QPATSGGNITYEGR.[F]	1xTMTpro [N-Term]	0.000133789	1	2	1	F2Y9E2	F2Y9E2 [195-208]	F2Y9E2; A0A6P6VNU6	0	1754.9	14	104.8	139.3	148.4	109.1	57.3	109.1	123	116.2	124	46.9	105.3	93.9	113.7	211.5	240.4	184.4	47.5	233.3	213.4	215.1	239.7	55.4	215.7	151.5	2	877.958	5.9	0.00518	15.224	7.779e-05	8.229e-07	3.1
675	High	[R].QNQQTEFLQR.[W]	1xTMTpro [N-Term]	0.000133789	1	1	1	A0A6P6TDP9	A0A6P6TDP9 [573-582]	A0A6P6TDP9	0	1595.85	10																									2	798.432	6.83	0.00545	19.2312	7.779e-05	6.855e-06	3.05
676	High	[K].QNDVSLALAK.[H]	1xTMTpro [K10]; 1xTMTpro [N-Term]	0.000133789	1	2	1	A0A6P6UMW7	A0A6P6UMW7 [10-19]	A0A6P6UMW7; A0A6P6UV97	0	1667	10																									3	556.342	8.16	0.00453	35.4706	7.779e-05	0.0001769	2.63
677	High	[KR].QNAVPGWITSGFVEYIK.[A]	1xTMTpro [K17]; 1xTMTpro [N-Term]	0.000133789	1	3	1	A0A6P6TSW3	A0A6P6TSW3 [51-67]	A0A6P6TS14; A0A6P6TSW3; A0A6P6U482	0	2517.4	17	67.4	69.4	59.9	114	176.2	106.5	114.7	114.1	122.8	181.9	137.3	118	26.6	38.3	35.3	70.1	53.1	82.8	72.4	76.8	86.3	78.1	102.2	69.2	3	839.811	6.97	0.00585	52.1625	7.779e-05	1.493e-06	4
678	High	[K].QNALLEFQK.[V]	1xTMTpro [K9]; 1xTMTpro [N-Term]	0.000133789	1	1	2	A0A6P6TUP7	A0A6P6TUP7 [34-42]	A0A6P6TUP7	0	1699	9	75.2	100.7	89.2	74	66.3	93.4	95.4	107.7	115.8	129.5	122.7	120.3	230	430.7	407.1	352.5	154.7	562.9	466.1	561.5	630.6	430.6	707.7	546.7	2	850.013	9.58	0.00814	40.5188	7.779e-05	6.297e-05	3.24
679	High	[R].QMVTNSTTAK.[D]	1xOxidation [M2]; 1xTMTpro [K10]; 1xTMTpro [N-Term]	0.000133789	2	3	1	A0A6P6SDS1; A0A6P6SDS2	A0A6P6SDS1 [291-300]; A0A6P6SDS2 [291-300]	A0A6P6SDS1; A0A6P6SDS2; A0A6P6SDQ3	0	1704.94	10	105	142.1	118.8	75	69.5	88.5	124	151.9	136	184.2	169.7	235.2	18.6	35.2	31.4	20.7	9.4	30.9	35.1	45.9	42.9	35.5	56.7	61.9	3	568.989	4.2	0.00239	13.1633	7.779e-05	0.0003088	2.63
680	High	[R].QMVTNSTTAK.[D]	1xTMTpro [K10]; 1xTMTpro [N-Term]	0.000133789	2	3	2	A0A6P6SDS1; A0A6P6SDS2	A0A6P6SDS1 [291-300]; A0A6P6SDS2 [291-300]	A0A6P6SDS1; A0A6P6SDS2; A0A6P6SDQ3	0	1688.95	10	63.6	94.7	73.6	63.3	44.9	54.5	82.3	80.1	83.4	199.2	206	251.9	146.5	305.1	252.7	227	78.9	247.2	303	314.4	342	499	894.7	862	2	844.985	7.71	0.00651	17.3942	7.779e-05	7.15e-07	3.96
681	High	[K].QMGLSDQDIVALSGGHTLGR.[C]	1xOxidation [M2]; 1xTMTpro [N-Term]	0.000133789	2	2	1	A0A385CHN3; A0A6P6W0Y9	A0A385CHN3 [148-167]; A0A6P6W0Y9 [148-167]	A0A385CHN3; A0A6P6W0Y9	0	2375.23	20	105.2	111.1	119.6	117.2	112.9	101.8	94	92.7	85.1	107	92.3	87	84.4	124.8	143.3	146.5	69.2	161	120.6	126.9	121.6	93.4	139.8	103.8	3	792.424	10.91	0.00864	35.838	7.779e-05	9.933e-11	5.08
682	High	[K].QMADAGIK.[Y]	1xTMTpro [K8]; 1xTMTpro [N-Term]	0.000133789	1	1	2	A0A6P6SM43	A0A6P6SM43 [48-55]	A0A6P6SM43	0	1441.83	8	90.7	100.7	111.3	113.1	106.9	113.9	106.7	111.5	127	108.3	120.5	105.6	161	250	294.8	312.6	144.9	398.4	302.8	337.8	401.4	209.2	403.6	278.7	2	721.424	5.64	0.00407	23.3853	7.779e-05	0.0003608	3.09
683	High	[R].QIYPPINVLPSLSR.[L]	1xTMTpro [N-Term]	0.000133789	1	2	2	A0A6P6U793	A0A6P6U793 [365-378]	A0A6P6U793; A0A6P6UCU6	0	1901.12	14	91.9	111	105.9	122.7	67.8	131.9	114.7	121.6	116.9	92.8	132.7	139.2	105.2	177.8	181	218.8	59.3	297.7	210	237.6	238.4	115.6	286.7	236.9	3	634.382	7.71	0.00488	48.6485	7.779e-05	1.651e-06	3.8
684	High	[K].QLYGNLGPK.[D]	1xTMTpro [K9]; 1xTMTpro [N-Term]	0.000133789	1	2	1	A0A6P6VWW4	A0A6P6VWW4 [378-386]	A0A6P6WCX1; A0A6P6VWW4	0	1597.96	9	110.3	132.5	126	107.8	132.1	121.2	119.9	122.3	126.4	75.3	80.4	75	75.2	126.4	128.2	114.5	68.8	162.8	130.7	142.3	153.5	55.9	103.4	76	2	799.485	4.73	0.00378	32.2439	7.779e-05	0.0001199	2.52
685	High	[K].QIVGTELDGMTLEDIIR.[V]	1xOxidation [M10]; 1xTMTpro [N-Term]	0.000133789	1	2	3	A0A6P6VM06	A0A6P6VM06 [89-105]	A0A6P6VM06; A0A6P6VM55	0	2223.19	17	97.8	117.6	114.9	102.2	84.7	104.4	102.9	104.5	104.6	68.2	86.4	82.2	155.4	261.3	272.3	252.8	102.7	326.9	261.3	283.2	295.9	117.9	258.9	194.1	3	741.739	7.18	0.00532	48.1263	7.779e-05	6.362e-08	4.2
686	High	[K].QIVGTELDGMTLEDIIR.[V]	1xTMTpro [N-Term]	0.000133789	1	2	7	A0A6P6VM06	A0A6P6VM06 [89-105]	A0A6P6VM06; A0A6P6VM55	0	2207.19	17	106.7	114.5	125.5	85.4	75.6	103.5	86	90.6	103.1	78.8	84.2	73.5	772.7	1160.5	1356.6	963.4	418.4	1477.6	996.1	1119.8	1330.4	621.4	1150.8	791.1	2	1104.11	8.72	0.00962	51.0024	7.779e-05	2.69e-13	4.11
687	High	[K].QLVASGKPESFSGEFLVPSYR.[G]	1xTMTpro [K7]; 1xTMTpro [N-Term]	0.000133789	1	1	1	A0A6P6TKM0	A0A6P6TKM0 [216-236]	A0A6P6TKM0	0	2906.59	21	179.9	147.3	179	95.4	82.7	93.2	45.4	45.3	45.2	23.7	28.3	23.1	579.8	664.4	861.1	479	203.7	591.8	233.8	249.3	259.2	83.1	171.8	110.7	3	969.544	9.69	0.00939	44.3231	7.779e-05	2.772e-13	5.89
688	High	[R].QLVADDAWLNGEFITTVQQR.[G]	1xTMTpro [N-Term]	0.000133789	1	1	2	A0A6P6WPF8	A0A6P6WPF8 [212-231]	A0A6P6WPF8	0	2608.37	20	107	120.1	104.4	82.8	79.9	95.3	118.5	97.2	102.2	93	155.2	166.4	20	31.4	29.1	24.1	11.4	35.1	35.4	31	34	18.9	54.7	46.2	3	870.138	11.59	0.01008	49.9037	7.779e-05	4.096e-10	5.71
689	High	[R].QLVADDAWLNGEFITTVQQR.[G]		0.000133789	1	1	1	A0A6P6WPF8	A0A6P6WPF8 [212-231]	A0A6P6WPF8	0	2304.16	20																									2	1152.59	3.4	0.00392	53.9561	7.779e-05	5.571e-06	3.28
690	High	[K].QLTSGLLLVTGPFK.[I]	1xTMTpro [K14]; 1xTMTpro [N-Term]	0.000133789	1	1	2	A0A6P6UM77	A0A6P6UM77 [112-125]	A0A6P6UM77	0	2082.28	14	79.1	95	95.9	111.1	146.7	107.1	103.2	101.1	89.3	132	119.5	120.6	107.5	180.7	194.7	235.3	152.4	286.9	224.3	234.6	216.3	195.3	306.5	243.7	3	694.772	9.82	0.00682	52.0779	7.779e-05	1.309e-08	4.39
691	High	[R].QPNGEDMGNFYSAGR.[D]	1xOxidation [M7]; 1xTMTpro [N-Term]	0.000133789	1	2	5	A0A6P6SDS1	A0A6P6SDS1 [337-351]	A0A6P6SDS1; A0A6P6SDQ3	0	1962.89	15	99.3	121.5	136.1	59.9	40.6	62.6	93.1	106.1	102.9	60.7	101.2	91	643.7	1101	1316.4	604.9	200.9	799.3	964.8	1173	1187.1	428	1236.5	876.1	2	981.955	4.28	0.0042	16.8812	7.779e-05	5.925e-06	2.55
692	High	[K].QISSPTTAAATLR.[L]	1xTMTpro [N-Term]	0.000133789	1	1	2	A0A6P6VGQ8	A0A6P6VGQ8 [61-73]	A0A6P6VGQ8	0	1620.92	13	85.1	101.8	82	98.6	63.2	103	116.3	116.2	109.2	71.1	117.3	106.8	235.1	393.6	338	424.2	133.3	560.6	513.8	547.7	537.4	213.7	611.4	438.4	2	810.971	6.63	0.00537	25.2409	7.779e-05	2.306e-07	3.31
693	High	[R].QPNLGCSEITPLDCNASR.[Y]	2xCarbamidomethyl [C6; C14]; 1xTMTpro [N-Term]	0.000133789	1	1	1	A0A6P6SG38	A0A6P6SG38 [349-366]	A0A6P6SG38	0	2336.13	18	93.3	93.9	90.1	88	99.5	95.8	86	89.5	81.1	86	83.3	77.3	121.1	170.5	174.5	178	98.7	245.1	178.6	198.2	187.4	121.5	203.9	149.2	3	779.385	4.82	0.00375	31.6764	7.779e-05	7.715e-10	4.58
694	High	[K].QPSADLYPNASQWYQSVSSK.[L]	1xTMTpro [K20]; 1xTMTpro [N-Term]	0.000133789	2	2	1	A0A6P6VP19; A0A6P6TUZ3	A0A6P6VP19 [46-65]; A0A6P6TUZ3 [46-65]	A0A6P6VP19; A0A6P6TUZ3	0	2864.47	20	84.3	85.6	89.6	93.8	100	88.4	97.8	93.8	105.2	170.9	149.7	168.5	105.7	150.2	167.8	183.2	95.8	218.4	196.1	200.7	234.9	233.3	354.1	314.1	3	955.502	7.39	0.00706	44.3952	7.779e-05	1.748e-06	3.91
695	High	[K].QQSQIQNSSEENR.[T]	1xTMTpro [N-Term]	0.000133789	1	3	1	A0A6P6VTJ4	A0A6P6VTJ4 [88-100]	A0A6P6VTJ4; A0A6P6WEU1; A0A6P6WCU4	0	1851.91	13	133.9	157.6	139.1	122.5	67.2	96.8	175	147.5	108.5	74.4	139	107.3	16.7	27.5	25.9	23.8	6.4	23.8	34.9	31.4	24.1	10.1	32.7	19.9	3	617.978	3.49	0.00216	9.8949	7.779e-05	2.744e-05	3.29
696	High	[R].QQSEAAGQAPPPETGGSR.[L]	1xTMTpro [N-Term]	0.000133789	1	2	1	A0A6P6STY2	A0A6P6STY2 [903-920]	A0A6P6STY2; A0A6P6SUP6	0	2072.03	18	101.6	113.7	88.6	94.5	58.8	102.2	140.8	145.8	116.4	74	111.9	100.6	56.4	88.3	73.4	81.7	24.9	111.8	124.9	138	115	44.7	117.1	83	3	691.354	6.47	0.00447	11.2395	7.779e-05	1.011e-10	5.98
697	High	[R].QQSDTLKAEVR.[D]	1xTMTpro [K7]; 1xTMTpro [N-Term]	0.000133789	1	1	2	A0A6P6VHB4	A0A6P6VHB4 [129-139]	A0A6P6VHB4	1	1883.08	11	119.9	133.9	127.2	86	87.7	67.8	111.1	99.7	89	65	82.8	46.8	246.3	384.7	390	275.1	137.6	274.3	364.9	349.4	325.4	145.3	320.7	142.9	3	628.37	6.65	0.00417	16.8985	7.779e-05	6.395e-07	3.85
698	High	[K].QQQPLWQCCQQLR.[N]	2xCarbamidomethyl [C8; C9]; 1xTMTpro [N-Term]	0.000133789	1	1	19	A0A6P6XN60	A0A6P6XN60 [90-102]	A0A6P6XN60	0	2077.04	13	99.1	127.4	107.4	88.4	68.7	97.2	120.6	118.5	113.9	71.8	127.7	91.5	1057	1899.6	1708.6	1467.9	559.1	2042.9	2055.6	2156.3	2162.5	832.8	2568.4	1449.8	2	1039.03	3.55	0.00369	29.319	7.779e-05	1.31e-07	4.12
699	High	[K].QQQPLWQCCQQLR.[N]	2xCarbamidomethyl [C8; C9]	0.000133789	1	1	5	A0A6P6XN60	A0A6P6XN60 [90-102]	A0A6P6XN60	0	1772.83	13																									2	886.926	7.25	0.00643	23.0236	7.779e-05	0.0003857	3.93
700	High	[R].QQQPLSHQVVK.[A]	1xTMTpro [K11]; 1xTMTpro [N-Term]	0.000133789	1	1	3	A0A6P6VED9	A0A6P6VED9 [6-16]	A0A6P6VED9	0	1900.13	11	109.1	100.9	122.8	121.6	138.7	94.8	86.3	110.9	86.5	109.5	121.4	110.9	299.7	387.8	503.6	520.2	291	513	379.1	519.7	422.9	327.1	628.8	452.9	2	950.57	3.8	0.00361	15.2558	7.779e-05	1.198e-07	3.94
701	High	[R].QQQEQELAK.[H]	1xTMTpro [K9]; 1xTMTpro [N-Term]	0.000133789	1	3	2	A0A6P6UED5	A0A6P6UED5 [469-477]	A0A6P6XFQ1; A0A6P6UED5; A0A6P6XB31	0	1709.97	9	100	85.4	88.6	134.2	116.8	84.6	126.9	113	84.5	92	93.8	125.1	304.6	364.1	402.9	636.6	271.7	507.9	618.1	587.4	458.3	305	539.1	566.5	2	855.494	7.6	0.0065	16.9489	7.779e-05	1.73e-05	3.78
702	High	[K].QQQDALPK.[Y]	1xTMTpro [K8]; 1xTMTpro [N-Term]	0.000133789	1	2	1	A0A6P6X5G9	A0A6P6X5G9 [753-760]	A0A6P6X5G9; A0A6P6XDE9	0	1535.9	8	70.3	81.2	75.6	127.4	125.8	121.9	91.4	101	98.9	108.4	115.6	104.2	139.6	225.6	224.1	394.1	190.9	477.2	290.2	342.4	350	234.3	433.3	307.7	2	768.462	8.44	0.00648	18.5182	7.779e-05	0.0004363	3.06
703	High	[K].QQLWYFNEAEK.[Q]	1xTMTpro [K11]; 1xTMTpro [N-Term]	0.000133789	1	2	1	A0A6P6VWP1	A0A6P6VWP1 [149-159]	A0A6P6VWP1; A0A6P6WG66	0	2064.1	11																									3	688.713	10.26	0.00706	43.7638	7.779e-05	0.0001117	3.21
704	High	[R].QQLQQGGGWQGEEMQQQVIQKAK.[N]	2xTMTpro [K21; K23]; 1xTMTpro [N-Term]	0.000133789	1	2	1	A0A6P6SAF5	A0A6P6SAF5 [112-134]	A0A6P6SAF5; A0A6P6SCF4	1	3539.92	23	79.1	94.2	92.5	78.5	110.7	88.2	81.5	80.5	96.2	100.8	98.5	86	121.7	202.9	212.5	188.3	130.2	267.6	200.6	211.4	263.6	168.9	286	196.8	4	885.743	8.11	0.00718	36.4329	7.779e-05	1.437e-15	7.64
705	High	[R].QQLQQGGGWQGEEMQQQVIQKAK.[N]	1xTMTpro [K23]; 1xTMTpro [N-Term]	0.000133789	1	2	1	A0A6P6SAF5	A0A6P6SAF5 [112-134]	A0A6P6SAF5; A0A6P6SCF4	1	3235.71	23	115.5	110.4	129.6	75.6	98.1	81.7	80.5	83	94.5	95.6	90	77.5	178.9	239.3	299.7	182.4	116.1	249.4	199.5	219.5	260.7	161.1	263.1	178.4	4	809.686	3.17	0.00257	40.501	7.779e-05	9.642e-06	4.49
706	High	[R].QQLQQGGGWQGEEMQQQVIQK.[A]	1xOxidation [M14]; 1xTMTpro [K21]; 1xTMTpro [N-Term]	0.000133789	1	2	90	A0A6P6SAF5	A0A6P6SAF5 [112-132]	A0A6P6SAF5; A0A6P6SCF4	0	3052.58	21	116.7	122.6	115.8	73.5	98.5	83.8	94.5	94.4	101.8	88.2	88.2	71.4	7003.8	10287.3	10369.7	6866.2	4514.1	9904.2	9063.5	9666.6	10877.8	5756.4	9981.7	6369.4	4	763.902	2.71	0.00207	29.8906	7.779e-05	4.244e-11	6.07
707	High	[R].QQLQQGGGWQGEEMQQQVIQK.[A]	1xTMTpro [K21]; 1xTMTpro [N-Term]	0.000133789	1	2	88	A0A6P6SAF5	A0A6P6SAF5 [112-132]	A0A6P6SAF5; A0A6P6SCF4	0	3036.58	21	106.6	116	117.6	81.1	111.8	96	97.8	96.6	110	98.2	91.3	72.9	5275.7	8037.6	8692.1	6254.7	4229.6	9367.2	7744.7	8160.5	9696.2	5292.6	8524.8	5365.8	3	1012.87	7.97	0.00807	35.5859	7.779e-05	4.163e-12	5.6
708	High	[R].QQLQQGGGWQGEEMQQQVIQK.[A]	1xOxidation [M14]; 1xTMTpro [K21]; 1xTMTpro [N-Term]	0.000133789	1	2	15	A0A6P6SAF5	A0A6P6SAF5 [112-132]	A0A6P6SAF5; A0A6P6SCF4	0	2748.37	21	137.9	107.2	115.1	73.5	150.6	77.8	86.6	85.4	98.7	124.9	75.4	71.1	1948.9	2120.6	2428.6	1618.1	1625.3	2165.8	1957	2059.8	2483.1	1920.8	2009.5	1493.9	3	916.807	13.07	0.01198	22.2779	7.779e-05	6.935e-10	4.79
709	High	[R].QQLQQGGGWQGEEMQQQVIQK.[A]	1xTMTpro [K21]; 1xTMTpro [N-Term]	0.000133789	1	2	39	A0A6P6SAF5	A0A6P6SAF5 [112-132]	A0A6P6SAF5; A0A6P6SCF4	0	2732.37	21	110.6	95.7	105.3	74.2	146.5	82.4	85.1	83.3	95.4	125.7	78	72.6	3115.9	3772.7	4428	3256.8	3153.5	4574.2	3832.8	4006	4785.1	3855.4	4146.8	3040.4	3	911.469	6.22	0.00566	31.6904	7.779e-05	6.809e-10	3.86
710	High	[R].QQIIEHIDLWLSQCR.[S]	1xCarbamidomethyl [C14]; 1xTMTpro [N-Term]	0.000133789	1	1	1	A0A6P6T8W3	A0A6P6T8W3 [482-496]	A0A6P6T8W3	0	2243.19	15	101.6	129.7	117.7	99.1	71.9	104.8	119	109.8	123	89.4	138.1	110.7	47	83.9	81.2	71.4	25.4	95.5	88	86.6	101.3	45	120.5	76.1	3	748.412	12.36	0.00924	50.4156	7.779e-05	7.431e-08	5.03
711	High	[K].QQGLNVTPR.[I]	1xTMTpro [N-Term]	0.000133789	2	2	1	A0A6P6WRR6; A0A6P6VAK0	A0A6P6WRR6 [325-333]; A0A6P6VAK0 [325-333]	A0A6P6WRR6; A0A6P6VAK0	0	1316.76	9	104.5	136.8	107.5	104.6	56.8	100.3	130.8	130.4	111.1	68.2	143.8	143.9	113.9	208.6	174.9	177.6	47.3	215.3	227.8	242.4	215.5	80.9	295.5	233	2	658.888	6.2	0.00408	15.7917	7.779e-05	6.361e-05	2.63
712	High	[K].QQENVLAESR.[M]	1xTMTpro [N-Term]	0.000133789	1	1	1	A0A6P6UV84	A0A6P6UV84 [51-60]	A0A6P6UV84	0	1477.79	10	96.9	124.6	119.3	106.7	52.4	113.7	129.3	116.8	139.7	52.8	139.7	105.3	58.4	105.1	107.3	100.2	24.1	135.1	124.6	120.1	150	34.6	158.8	94.3	2	739.404	5.56	0.0041	15.4084	7.779e-05	9.528e-06	2.82
713	High	[K].QQDPIYDPVK.[S]	1xTMTpro [K10]; 1xTMTpro [N-Term]	0.000133789	1	2	4	A0A6P6S6X1	A0A6P6S6X1 [177-186]	A0A6P6TT74; A0A6P6S6X1	0	1811.02	10	87	81.3	89.1	104.9	120	113.8	102.4	111.6	126.3	130.1	115.2	110.6	324.5	424.1	496.2	609.7	342	836.7	610.7	710.6	839	528.2	810.6	613.4	2	906.017	3.57	0.00323	30.4887	7.779e-05	1.275e-05	2.7
714	High	[K].QQDPIYDPAK.[S]	1xTMTpro [K10]; 1xTMTpro [N-Term]	0.000133789	1	1	6	A0A6P6TYA7	A0A6P6TYA7 [177-186]	A0A6P6TYA7	0	1782.99	10	79.3	84.2	87.8	93.9	93	108.5	111.5	118.8	120.4	113.7	108	105.2	360.1	534.9	594.9	664.3	322.5	971.1	809.4	920	973.2	561.5	925.3	710.1	2	892.004	6.73	0.006	24.8627	7.779e-05	8.042e-07	2.89
715	High	[R].QQDEELALLHADPFDVEAQKR.[I]	1xTMTpro [K20]; 1xTMTpro [N-Term]	0.000133789	1	2	1	A0A6P6S8W8	A0A6P6S8W8 [149-169]	A0A6P6SFY3; A0A6P6S8W8	1	3060.62	21	104.2	110.8	133.7	87.1	107.1	112.6	94.3	91.9	116.6	105.2	101.5	82.8	51.1	76	97.8	66.5	40.1	108.8	73.9	76.9	101.8	56.1	93.9	60.3	4	765.919	9.44	0.00722	44.2411	7.779e-05	4.2e-16	6.45
716	High	[R].QQAQQNSMEAIR.[A]	1xOxidation [M8]; 1xTMTpro [N-Term]	0.000133789	2	4	2	A0A6P6XJ69; A0A6P6SAR4	A0A6P6XJ69 [75-86]; A0A6P6SAR4 [75-86]	A0A6P6XLV1; A0A6P6XJ69; A0A6P6S9N8; A0A6P6SAR4	0	1723.87	12	117.2	165.5	163.5	59.4	27.6	70.1	100.6	96.4	102.5	34.2	86.6	61.5	345.2	682.2	719	272.5	62.2	407.1	473.8	484.7	537.8	109.7	481.6	269.5	2	862.445	6.01	0.00518	10.7461	7.779e-05	1.033e-06	2.55
717	High	[R].QQAQQNSMEAIR.[A]	1xTMTpro [N-Term]	0.000133789	2	4	2	A0A6P6XJ69; A0A6P6SAR4	A0A6P6XJ69 [75-86]; A0A6P6SAR4 [75-86]	A0A6P6XLV1; A0A6P6XJ69; A0A6P6S9N8; A0A6P6SAR4	0	1707.88	12	111.1	130	129.2	82.9	78.6	96.4	108.4	108.9	108.2	59.7	85.8	67.8	297.3	486.6	515.9	345.7	160.6	508.4	463.9	497.3	515.7	173.7	433.3	269.5	2	854.445	3.23	0.00276	14.3861	7.779e-05	1.445e-07	3.66
718	High	[R].QQALDELEKYQTEAR.[E]	1xTMTpro [K9]; 1xTMTpro [N-Term]	0.000133789	2	2	1	A0A6P6XGC1; A0A6P6X732	A0A6P6XGC1 [942-956]; A0A6P6X732 [942-956]	A0A6P6XGC1; A0A6P6X732	1	2430.31	15	111.2	107.2	102.1	98.4	80.8	122.4	100.1	112.9	128.7	78.1	100.2	43.1	210.4	283.9	288.5	290.1	116.8	456.4	302.8	364.7	433.8	160.9	357.6	121.3	3	810.781	6.77	0.00548	35.7783	7.779e-05	7.344e-13	4.96
719	High	[R].QQALDELEK.[Y]	1xTMTpro [K9]; 1xTMTpro [N-Term]	0.000133789	2	2	4	A0A6P6XGC1; A0A6P6X732	A0A6P6XGC1 [942-950]; A0A6P6X732 [942-950]	A0A6P6XGC1; A0A6P6X732	0	1681.96	9	107.4	108.9	103.8	107	101.6	102.7	101.2	102.1	98.2	86.8	86.2	100.5	276.8	392.8	399.2	429.7	200.1	521.4	417.2	449	450.8	243.4	419	384.9	2	841.491	7.53	0.00634	33.0593	7.779e-05	2.874e-05	3.22
720	High	[R].QQAEDFVCR.[I]	1xCarbamidomethyl [C8]; 1xTMTpro [N-Term]	0.000133789	1	2	2	A0A6P6UMJ1	A0A6P6UMJ1 [305-313]	A0A6P6UMJ1; A0A6P6UTK1	0	1456.72	9	94.2	86.4	81.2	92.2	58.9	93.2	128.8	130.9	116.1	59	112.2	97.3	331.4	425.2	426.3	505.3	158.3	646.5	724.8	785.8	727.2	225.8	745	508.8	2	728.867	6.34	0.00462	16.1101	7.779e-05	0.0002296	2.37
721	High	[K].QQADYVIQQADSDKDGR.[L]	1xTMTpro [K14]; 1xTMTpro [N-Term]	0.000133789	1	1	1	A0A6P6V5F1	A0A6P6V5F1 [336-352]	A0A6P6V5F1	1	2545.31	17	103.2	130.5	126.2	87.9	76.3	114.3	107	106.8	108.7	78.1	90.2	79.2	101.1	179	184.6	134.2	57.1	220.7	167.6	178.6	189.8	83.3	166.7	115.4	3	849.112	3.5	0.00297	27.1858	7.779e-05	4.101e-06	2.78
722	High	[R].QQAADLISR.[I]	1xTMTpro [N-Term]	0.000133789	1	1	1	A0A6P6U7G2	A0A6P6U7G2 [602-610]	A0A6P6U7G2	0	1305.74	9	83.4	122.6	113.6	81.4	42.9	88.6	103.4	107.9	95.8	53.3	109.4	87.5	147	302.4	298.8	223.5	57.7	307.8	291.4	324.5	300.7	102.2	363.8	229.1	2	653.381	8.11	0.0053	20.3899	7.779e-05	0.0001908	2.52
723	High	[R].QPSELELEQAFHQGK.[Y]	1xTMTpro [K15]; 1xTMTpro [N-Term]	0.000133789	1	1	2	A0A6P6S7X7	A0A6P6S7X7 [176-190]	A0A6P6S7X7	0	2349.27	15	121.4	93.4	118.3	112.1	126.2	118.6	90.4	92.2	112.4	115.5	93.6	96	128	137.7	186.2	184	101.6	246.3	152.4	165.8	211	132.5	186.1	150.5	3	783.767	7.83	0.00613	37.3666	7.779e-05	2.953e-12	5.42
724	High	[K].QPNTGLFVGLNR.[G]	1xTMTpro [N-Term]	0.000133789	1	2	1	A0A6P6WNI8	A0A6P6WNI8 [5-16]	A0A6P6WNI8; A0A6P6VL93	0	1619.92	12	117.6	113.6	119.7	103.9	88.9	108.8	115.3	104.6	123.3	89.4	97.1	86.8	97	131.1	147.4	133.5	56	176.8	152.1	147.2	181.1	80.2	151.1	106.4	3	540.647	5.31	0.00287	38.3447	7.779e-05	0.0003263	2.99
725	High	[K].QGQLIIVPQYFAVIKK.[A]	2xTMTpro [K15; K16]; 1xTMTpro [N-Term]	0.000133789	1	1	2	A0A6P6WMC4	A0A6P6WMC4 [399-414]	A0A6P6WMC4	1	2757.72	16	92.1	126.6	91.7	72.4	115.8	97.2	82.5	79.6	96.6	142	133	104.4	121.1	232.8	179.9	148.3	116.3	251.9	173.5	178.6	226.2	203.1	330	204	3	919.918	6.42	0.0059	49.6649	7.779e-05	5.692e-09	5.2
726	High	[K].QLSQWPIEEIEGLRK.[D]	1xTMTpro [K15]; 1xTMTpro [N-Term]	0.000133789	1	2	1	A0A6P6TPQ2	A0A6P6TPQ2 [359-373]	A0A6P6TPQ2; A0A6P6U1T4	1	2434.39	15	88.1	91.4	93.6	101.1	102.4	117.2	107.7	105.8	117.6	94.6	91	102.7	106.9	155.2	169.4	191	94.9	280.2	208.9	219	254.1	124.8	208.2	185.2	3	812.144	9.74	0.0079	46.9731	7.779e-05	1.739e-07	3.47
727	High	[K].QISLLAPVVLDATPIGK.[K]	1xTMTpro [K17]; 1xTMTpro [N-Term]	0.000133789	1	2	1	A0A6P6W5U2	A0A6P6W5U2 [644-660]	A0A6P6UFP3; A0A6P6W5U2	0	2343.45	17	108	99.5	97.3	89.1	104	94.7	109.2	113.8	106.8	109.7	109.9	119.3	43	55.4	57.8	55.2	31.6	74.3	69.5	77.3	75.7	47.5	82.5	70.6	3	781.83	10.43	0.00815	53.715	7.779e-05	3.388e-08	4.1
728	High	[R].QIDTNGQGIANGFLTVNYEFVNC.[-]	1xCarbamidomethyl [C23]; 1xTMTpro [N-Term]	0.000133789	1	1	1	A0A6P6W410	A0A6P6W410 [120-142]	A0A6P6W410	0	2878.4	23	106.8	99.5	107.2	81.7	107	83	115.4	101.7	121	123.9	154.4	114.8	64.2	83.7	96.2	76.5	49.1	98.3	110.9	104.3	129.5	81	175.1	102.6	3	960.147	9.39	0.00901	51.9901	7.779e-05	5.478e-08	5.82
729	High	[K].QIDELSSFSDSPAPSVTR.[I]	1xTMTpro [N-Term]	0.000133789	1	2	3	A0A6P6WLV7	A0A6P6WLV7 [71-88]	A0A6P6WMG5; A0A6P6WLV7	0	2240.14	18	104.2	121.7	117	86.6	85.1	99.9	95.3	104.6	103.6	72.1	99.1	77.8	301	492	504.7	389.8	187.9	568.7	440.3	515.6	533	226.7	540.2	334.3	2	1120.58	6.84	0.00767	40.416	7.779e-05	1.366e-12	5.07
730	High	[R].QLDELGDTSTLADPSVVDQLIK.[L]	1xTMTpro [K22]; 1xTMTpro [N-Term]	0.000133789	1	2	1	A0A6P6VGG6	A0A6P6VGG6 [794-815]	A0A6P6VGG6; A0A6P6VHS6	0	2965.62	22	91.5	88.5	96	88.3	124.4	95.6	102.9	97	116.3	171	116	127.3	73	98.8	114.4	109.8	75.8	150.3	131.3	132.1	165.3	148.5	174.7	151	3	989.223	11.1	0.01097	52.9588	7.779e-05	1.041e-09	4.92
731	High	[R].QLDELGDTSTLADPSVVDELIK.[L]	1xTMTpro [K22]; 1xTMTpro [N-Term]	0.000133789	1	1	1	A0A6P6UZI2	A0A6P6UZI2 [1164-1185]	A0A6P6UZI2	0	2966.61	22	77.7	66.8	77.4	70.8	99.8	81.6	78	78.8	81.2	132.9	86	102.6	78.8	94.8	117.2	111.8	77.3	163.1	126.5	136.4	146.7	146.6	164.6	154.6	3	989.541	0.85	0.00084	52.7926	7.779e-05	1.974e-07	3.47
732	High	[R].QLASHFGFPQK.[F]	1xTMTpro [K11]; 1xTMTpro [N-Term]	0.000133789	1	1	5	A0A6P6VZ23	A0A6P6VZ23 [194-204]	A0A6P6VZ23	0	1868.07	11	102.4	104.6	112.8	86.7	104.6	83.7	86.6	77.3	87.4	82.6	86.7	79.9	339.4	485.1	557.9	447.3	264.7	546.5	459.1	437	515.8	297.9	541.9	393.7	3	623.364	5	0.00311	35.5076	7.779e-05	2.027e-09	4.69
733	High	[R].QLAQAVSSGDLAAADSK.[A]	1xTMTpro [K17]; 1xTMTpro [N-Term]	0.000133789	1	4	1	A0A6P6UKM9	A0A6P6UKM9 [483-499]	A0A6P6UKM9; A0A6P6WBQ1; A0A6P6UKN5; A0A6P6UMD1	0	2240.24	17																									3	747.418	1.02	0.00076	37.7937	7.779e-05	5.188e-06	2.81
734	High	[K].QLALPDESEVAGHSK.[F]	1xTMTpro [K15]; 1xTMTpro [N-Term]	0.000133789	1	1	2	A0A6P6WKV7	A0A6P6WKV7 [70-84]	A0A6P6WKV7	0	2189.21	15	129.5	96.3	96.6	96.5	127.6	97.3	106.2	98.1	96.1	116.9	94.4	96.3	169.1	176	188.3	196.3	127.3	250.4	221.7	218.6	223.6	166.1	232.5	187	3	730.411	5.47	0.00399	30.2078	7.779e-05	1.032e-12	5.3
735	High	[R].QLAEMMTEVYAK.[V]	1xTMTpro [K12]; 1xTMTpro [N-Term]	0.000133789	1	1	1	A0A6P6U309	A0A6P6U309 [297-308]	A0A6P6U309	0	2022.09	12	81.6	90.7	109.3	105	195.1	132.9	94.2	112.1	141.7	206.3	142.2	114.9	21.4	33.3	42.8	42.9	39.1	68.7	39.5	50.2	66.2	58.9	70.4	44.8	3	674.707	8.05	0.00542	47.9417	7.779e-05	1.72e-07	3.66
736	High	[K].QLAALNFQDAPLIGAFNPK.[K]	1xTMTpro [K19]; 1xTMTpro [N-Term]	0.000133789	2	2	1	A0A6P6XGC1; A0A6P6X732	A0A6P6XGC1 [761-779]; A0A6P6X732 [761-779]	A0A6P6XGC1; A0A6P6X732	0	2636.51	19	82.4	83	81.4	132.2	168.1	120.6	114.5	102.7	118.6	158.2	153.8	125.2	32.4	45.7	47.8	81	50.5	93.5	72	68.9	83.1	67.7	114.1	73.2	3	879.514	8.48	0.00745	52.5112	7.779e-05	8.561e-10	4.63
737	High	[K].QKVDGIDKEK.[F]	3xTMTpro [K2; K8; K10]; 1xTMTpro [N-Term]	0.000133789	1	1	8	A0A6P6WQQ5	A0A6P6WQQ5 [69-78]	A0A6P6WQQ5	2	2376.46	10	112.3	67.7	72.7	165	128.6	104.8	120.3	118.2	89.1	72.5	66.4	85.7	1988.4	1677.7	1922.6	4552.7	1739.3	3657.1	3406.2	3571.7	2810.9	1397.3	2217.5	2256.5	3	792.83	6.08	0.00482	19.569	7.779e-05	2.028e-07	4.33
738	High	[R].QKPGGDVTIGELLK.[K]	2xTMTpro [K2; K14]; 1xTMTpro [N-Term]	0.000133789	1	2	2	A0A6P6XI88	A0A6P6XI88 [246-259]	A0A6P6X6Y0; A0A6P6XI88	0	2367.44	14	72.8	79.1	95.4	124.8	155.6	137.4	98.5	102.6	105.8	136.4	106.4	121.6	126.3	192.1	247.1	337.4	206.2	469.9	273.2	303.8	326.9	257.6	348.3	313.6	3	789.826	8.96	0.00707	42.5143	7.779e-05	8.727e-08	5.39
739	High	[R].QKGAVTGVK.[D]	2xTMTpro [K2; K9]; 1xTMTpro [N-Term]	0.000133789	1	7	2	A0A6P6SRG0	A0A6P6SRG0 [132-140]	A0A6P6SRG0; A0A6P6T476; A0A6P6T4W0; A0A6P6SWU2; A0A6P6SXB9; A0A6P6SSK6; A0A6P6SWK5	1	1800.15	9	98.5	82.5	68.3	108.9	85.8	75.7	120.7	132	71.7	66.2	82.3	118	437.4	512.7	452.9	752.7	290.8	662.3	856.9	999.6	567	319.8	689	778.5	3	600.725	4.78	0.00287	16.3783	7.779e-05	6.594e-05	1.92
740	High	[R].QKETSSTSGMR.[E]	1xTMTpro [K2]; 1xTMTpro [N-Term]	0.000133789	1	3	1	A0A6P6VQG2	A0A6P6VQG2 [212-222]	A0A6P6VQG2; A0A6P6W8I3; A0A6P6VQ32	1	1819.98	11	102	95.1	97.5	139.4	99.4	104.1	125.5	121.5	117.9	83.8	123.6	118.2	115.9	151.2	165.3	246.6	86.2	233	227.9	235.4	238.4	103.6	264.8	199.5	3	607.338	8.38	0.00508	10.4988	7.779e-05	0.0004198	2.78
741	High	[R].QKAPISLPVETFK.[G]	2xTMTpro [K2; K13]; 1xTMTpro [N-Term]	0.000133789	1	2	1	A0A6P6XAR1	A0A6P6XAR1 [132-144]	A0A6P6XAR1; A0A6P6X8E6	1	2370.46	13	97.6	94.5	94.2	116.6	155.3	114	91.1	93.2	101.6	116	101.5	90.6	123.3	167.1	177.6	229.5	149.8	283.7	184	200.8	228.5	159.4	241.8	170.1	4	593.373	5.45	0.00323	43.7598	7.779e-05	4.951e-07	4.12
742	High	[K].QKAEEAAADTGALKGFQK.[T]	3xTMTpro [K2; K14; K18]; 1xTMTpro [N-Term]	0.000133789	2	2	1	A0A6P6XCX5; A0A6P6X9W9	A0A6P6XCX5 [415-432]; A0A6P6X9W9 [415-432]	A0A6P6XCX5; A0A6P6X9W9	2	3079.79	18	119.2	108.3	114.3	102.2	125.7	117.2	85.6	102.1	87.4	95.7	82.7	58.5	272.2	345.9	389.6	363.3	219.2	527.1	312.3	397.9	355.3	237.7	356.3	198.6	4	770.709	8.07	0.00622	32.8417	7.779e-05	9.481e-07	2.95
743	High	[K].QKAEEAAADTGALK.[G]	2xTMTpro [K2; K14]; 1xTMTpro [N-Term]	0.000133789	2	2	1	A0A6P6XCX5; A0A6P6X9W9	A0A6P6XCX5 [415-428]; A0A6P6X9W9 [415-428]	A0A6P6XCX5; A0A6P6X9W9	1	2315.34	14	115.3	119.1	144.4	96.4	102.4	78.4	69.2	73	68.5	78.1	78	94.6	344.2	497.2	643.2	448.1	233.5	460.9	330.2	371.5	364	253.5	439.1	419.5	3	772.457	7.71	0.00595	25.449	7.779e-05	3.181e-13	6.66
744	High	[K].QHVMDPTPK.[A]	1xTMTpro [K9]; 1xTMTpro [N-Term]	0.000133789	2	3	3	A0A6P6WGL7; A0A6P6W0C7	A0A6P6WGL7 [73-81]; A0A6P6W0C7 [73-81]	A0A6P6WGL7; A0A6P6W0C7; A0A6P6WGI6	0	1660.93	9	111	100.6	96.7	121.8	115.1	120.1	109.3	110.8	112.4	78	92	83.3	260.4	330.2	338.4	444.9	206.2	555.2	409.8	443.3	469.5	199.1	406.8	290.2	2	830.974	4.64	0.00385	15.586	7.779e-05	0.000113	2.44
745	High	[K].QHTYVETENVR.[Y]	1xTMTpro [N-Term]	0.000133789	1	1	1	A0A6P6WD97	A0A6P6WD97 [45-55]	A0A6P6WD97	0	1679.87	11	75.1	123.7	99.8	93.9	33.8	117.8	121	121.2	123.8	44.3	141.2	99	104.2	240.2	206.8	202.9	35.8	322.2	268.4	286.9	305.9	66.9	369.7	204.2	2	840.44	3.43	0.00288	11.9156	7.779e-05	1.371e-05	3.69
746	High	[R].QHLGAIVYLSDSR.[A]	1xTMTpro [N-Term]	0.000133789	1	1	4	A0A6P6XJ76	A0A6P6XJ76 [255-267]	A0A6P6XJ76	0	1762.98	13	104.2	135.3	116.4	104.6	66.9	116.9	117.5	123.7	126.1	78.9	118.1	107.8	69	125.3	115	107.8	33.8	152.5	124.4	139.7	148.7	56.8	147.5	106.1	3	588.332	2.62	0.00154	29.8011	7.779e-05	1.171e-06	3.36
747	High	[K].QHAEVEFIVGPIPINDGLGK.[E]	1xTMTpro [K20]; 1xTMTpro [N-Term]	0.000133789	1	2	2	A0A6P6X5T5	A0A6P6X5T5 [699-718]	A0A6P6X5T5; A0A6P6X541	0	2741.55	20	96.5	114	149.3	96.3	124.6	103.8	82.7	80.9	95.5	120.3	92.7	84	122.8	203.1	283.7	190.9	121.1	260.3	168.3	175.8	216.4	166.6	222.6	159	3	914.529	9.18	0.00839	46.8208	7.779e-05	1.831e-09	5.54
748	High	[K].QHADDLK.[T]	1xTMTpro [K7]; 1xTMTpro [N-Term]	0.000133789	2	2	2	A0A6P6X4A5; A0A6P6XCT9	A0A6P6X4A5 [175-181]; A0A6P6XCT9 [175-181]	A0A6P6X4A5; A0A6P6XCT9	0	1434.82	7	134.3	59	55.5	174	59.1	75.3	155	158.9	53.1	58.8	77.4	151.9	651.3	400.1	401.7	1314.4	219	719.4	1201.6	1314.8	458.2	310.2	708	1094.6	3	478.948	6.51	0.00311	12.3567	7.779e-05	0.0003283	3.63
749	High	[K].QGVQTGSQYAAEK.[A]	1xTMTpro [K13]; 1xTMTpro [N-Term]	0.000133789	2	4	3	A0A6P6XJ69; A0A6P6SAR4	A0A6P6XJ69 [123-135]; A0A6P6SAR4 [123-135]	A0A6P6XLV1; A0A6P6XJ69; A0A6P6S9N8; A0A6P6SAR4	0	1975.07	13	113.7	115.7	116.9	82.3	98.5	88.5	82.8	82.1	93	97.3	103.2	81.8	931.9	1327.5	1430.5	1051.1	617	1430	1086	1148.7	1357.7	868.5	1597.1	997.2	2	988.045	4.76	0.0047	17.4432	7.779e-05	2.731e-10	5.92
750	High	[R].QGVIEVAK.[I]	1xTMTpro [K8]; 1xTMTpro [N-Term]	0.000133789	1	2	2	A0A6P6T0X5	A0A6P6T0X5 [188-195]	A0A6P6T0X5; A0A6P6T2J4	0	1451.91	8	91.5	103.8	100.7	117.8	134.9	125.1	108.3	102.5	116.6	103.2	101.1	94.6	102.8	163.1	168.8	206.1	115.7	276.8	194.4	196.3	233.1	126.1	214.1	157.9	2	726.464	8.34	0.00606	27.572	7.779e-05	0.0003355	2.85
751	High	[K].QGVKPGELAIISK.[E]	2xTMTpro [K4; K13]; 1xTMTpro [N-Term]	0.000133789	1	1	1	A0A6P6SJ99	A0A6P6SJ99 [27-39]	A0A6P6SJ99	0	2252.42	13	100.1	98.5	95	85.4	111	105.1	100.3	90.8	106.8	85.1	92.1	75.1	129.5	178.3	183.5	172.1	109.7	268	207.6	200.5	246.1	119.8	224.9	144.4	2	1126.72	6.29	0.00708	39.4051	7.779e-05	0.0002875	3.65
752	High	[K].QGVESGTQVASEK.[A]	1xTMTpro [K13]; 1xTMTpro [N-Term]	0.000133789	1	2	3	A0A6P6XJ69	A0A6P6XJ69 [145-157]	A0A6P6XLV1; A0A6P6XJ69	0	1928.06	13	98.1	107	103.5	102.7	104.7	93.3	101.7	100.4	104.7	110.5	115.1	96.4	383.8	585.6	604.4	626.1	312.9	719.4	636.5	670.1	729.7	470.6	849.7	560.8	2	964.54	7.53	0.00726	16.7435	7.779e-05	6.016e-09	5.12
753	High	[R].QGVEQGPQIDSEQFDK.[V]	1xTMTpro [K16]; 1xTMTpro [N-Term]	0.000133789	1	1	2	A0A6P6X673	A0A6P6X673 [370-385]	A0A6P6X673	0	2413.25	16	103	118.8	117.1	94.7	113.2	112.9	98.7	108	111	101.4	88.7	76.1	164.1	264.9	278.5	235	137.7	354.5	251.3	293.6	314.9	175.7	266.5	180.3	3	805.094	8.13	0.00654	30.412	7.779e-05	6.79e-08	5.03
754	High	[R].QGVEGGFQGR.[T]	1xTMTpro [N-Term]	0.000133789	1	2	1	A0A6P6VJK5	A0A6P6VJK5 [153-162]	A0A6P6VJK5; A0A6P6TC89	0	1338.71	10	86	105.8	99	78.2	44.3	86.1	98.8	104.6	93.9	39.5	97.9	72.2	144.6	248.9	248.4	204.7	56.9	285.3	265.6	300	281	72.3	310.4	180.4	2	669.865	10.5	0.00703	14.8262	7.779e-05	0.0001096	2.71
755	High	[K].QGVAITQENSLLDNTAR.[I]	1xTMTpro [N-Term]	0.000133789	1	1	2	A0A6P6UUG7	A0A6P6UUG7 [287-303]	A0A6P6UUG7	0	2134.14	17	100.3	118.9	114.9	82.6	48.8	99.2	103.3	99.9	98.6	55.1	105.3	73.8	219.5	363.9	375.4	281.7	81.5	427.7	361.6	373	384.1	131.2	434.6	240.1	2	1067.58	0.26	0.00027	33.8692	7.779e-05	1.085e-10	4.51
756	High	[R].QGTTSQTVEK.[E]	1xTMTpro [K10]; 1xTMTpro [N-Term]	0.000133789	1	2	1	A0A6P6S7D2	A0A6P6S7D2 [78-87]	A0A6P6S7D2; A0A6P6S8P2	0	1686.95	10	131.1	111.1	95.2	120.9	102.8	73.6	123.1	115.6	75.7	76.7	91.8	124.4	105.4	124.9	114.2	151.4	63.1	116.6	158.2	158.6	108.4	67.1	139.2	148.7	2	843.985	6.47	0.00546	13.4923	7.779e-05	2.489e-06	2.56
757	High	[K].QLDTNVSLK.[E]	1xTMTpro [K9]; 1xTMTpro [N-Term]	0.000133789	1	6	1	A0A6P6WS58	A0A6P6WS58 [152-160]	A0A6P6VZL7; A0A6P6WP24; A0A6P6WLR8; A0A6P6WS58; A0A6P6WG18; A0A6P6WGM9	0	1625.97	9	115.2	77.1	83.5	101.5	157.7	113	113.4	120.1	134.7	127.8	97.9	92.8	162.2	151.9	175.4	222.5	169.6	313.4	255.3	288.6	337.7	195.7	259.9	194.2	2	813.494	5.82	0.00473	31.3911	7.779e-05	0.0004286	1.52
758	High	[K].QLSQWPIEEIEGLR.[K]	1xTMTpro [N-Term]	0.000133789	1	2	1	A0A6P6TPQ2	A0A6P6TPQ2 [359-372]	A0A6P6TPQ2; A0A6P6U1T4	0	2002.09	14	86.3	112.7	102.6	98.2	61.2	117.6	105.5	113.8	124.1	64.4	110.1	84.8	101.8	186	180.6	180.5	55.1	273.3	198.9	229.1	260.7	82.6	245	148.7	2	1001.56	9.13	0.00914	49.6226	7.779e-05	2.842e-07	3.41
759	High	[R].QIEAGEFVWR.[T]	1xTMTpro [N-Term]	0.000133789	1	2	1	A0A6P6UU15	A0A6P6UU15 [147-156]	A0A6P6UU15; A0A6P6UKX4	0	1538.83	10	101.5	109.1	115.2	117.6	70.8	121.6	115.5	114.5	120	81.5	114.2	98.9	79.8	120	135.1	144	42.5	188.3	145.2	153.5	167.9	69.7	169.3	115.6	2	769.925	8.58	0.0066	42.3259	7.779e-05	8.03e-05	3.34
760	High	[K].QLEEDGFDSDAVEASLNTIEFSLR.[E]	1xTMTpro [N-Term]	0.000133789	1	2	1	A0A6P6VSB3	A0A6P6VSB3 [468-491]	A0A6P6VSB3; A0A6P6WB48	0	2989.46	24	82.6	96.2	88.8	92.2	105.9	99.2	91.6	92	93	105.1	100.5	97.6	103.9	169.3	166.8	180.6	101.7	246	184.2	197.4	208.3	143.9	238.4	182.5	3	997.157	-0.63	-0.00063	53.822	7.779e-05	1.141e-14	6.02
761	High	[R].QISELGIYPAVDPLDSTSR.[M]	1xTMTpro [N-Term]	0.000133789	2	3	2	A0A6P6V6E0; A0A6P6VBW3	A0A6P6V6E0 [413-431]; A0A6P6VBW3 [413-431]	A0A6P6V6E0; A0A6P6VBW3; A0A6P6T762	0	2365.26	19	91.5	110.6	121.3	102.2	76.5	120.4	115.1	114.5	125.9	86.1	130	113.3	194.4	328.8	384.7	338.2	124.2	503.9	391	415.1	476.2	199	520.9	357.7	2	1183.14	6.96	0.00823	47.3777	7.779e-05	2.644e-13	4.56
762	High	[K].QLQEEEKLER.[Q]	1xTMTpro [K7]; 1xTMTpro [N-Term]	0.000133789	1	2	1	A0A6P6VVV9	A0A6P6VVV9 [670-679]	A0A6P6VVV9; A0A6P6WG01	1	1910.08	10	102.2	83.6	98.8	142.3	99	94.6	135.8	115.9	96.7	110.2	118.3	134.4	110.7	126.7	159.8	240.1	81.9	202	235.2	214.3	186.5	129.9	241.7	216.4	3	637.369	4.14	0.00264	19.8801	7.779e-05	3.66e-05	3.37
763	High	[K].QLQDQIYAEIR.[G]	1xTMTpro [N-Term]	0.000133789	1	2	2	A0A6P6VAQ7	A0A6P6VAQ7 [76-86]	A0A6P6VAQ7; A0A6P6V2E5	0	1680.92	11	94.3	124.9	126.6	88.9	51.1	94.3	107.4	101.6	105.2	61.6	92.3	75.2	133.4	247	267.1	195.9	55.2	262.9	242.8	245.2	265	94.7	246.1	158	2	840.972	7.26	0.0061	38.1796	7.779e-05	2.034e-07	3.53
764	High	[K].QIPVDAVFQKDEMIDIIGVTK.[G]	1xOxidation [M13]; 2xTMTpro [K10; K21]; 1xTMTpro [N-Term]	0.000133789	1	2	1	A0A6P6WEK8	A0A6P6WEK8 [205-225]	A0A6P6WEK8; A0A6P6VV21	1	3287.87	21	84.5	85.3	98.7	120.2	153.4	122.4	98.9	108.4	113.6	143.6	105.6	108.6	42	59.3	73.2	93	58.2	119.8	78.6	91.9	100.5	77.6	99	80.2	4	822.732	9.74	0.00801	48.8622	7.779e-05	9.486e-08	4.66
765	High	[K].QIPVDAVFQKDEMIDIIGVTK.[G]	2xTMTpro [K10; K21]; 1xTMTpro [N-Term]	0.000133789	1	2	1	A0A6P6WEK8	A0A6P6WEK8 [205-225]	A0A6P6WEK8; A0A6P6VV21	1	3271.88	21	88.6	92.9	108.5	119.5	146.3	142.6	97.3	98.9	112.1	123.7	102.5	75.5	153.3	224.9	280.2	322.1	193.4	486.3	269.2	291.9	345.5	232.9	334.6	194.3	3	1091.31	7.89	0.0086	51.5123	7.779e-05	1.786e-09	4.76
766	High	[K].QLPGVIALDEATPVPV.[-]	1xTMTpro [N-Term]	0.000133789	2	2	2	A0A6P6S6R3; A0A6P6SEC2	A0A6P6S6R3 [467-482]; A0A6P6SEC2 [467-482]	A0A6P6S6R3; A0A6P6SEC2	0	1923.11	16	81.4	96.6	100.1	90.1	100.5	116.8	97.9	103	119.2	102	106.8	87.4	235.9	391.6	432.9	406.7	222.4	667.2	453.9	509.5	615.1	321.6	584	376.7	3	641.713	6.96	0.00446	53.1935	7.779e-05	1.935e-05	3.93
767	High	[R].QLPGICNLQPK.[E]	1xCarbamidomethyl [C6]; 1xTMTpro [K11]; 1xTMTpro [N-Term]	0.000133789	1	1	11	A0A6P6XN60	A0A6P6XN60 [144-154]	A0A6P6XN60	0	1876.1	11	64.6	74	74.8	79.9	80.7	75.7	88.1	84	91.7	163.6	195.9	203.9	526.2	844.3	910.4	1014.4	502.5	1216.6	1147.5	1168	1330.8	1451.2	3012	2469.9	2	938.559	6.88	0.00645	41.067	7.779e-05	2.303e-07	3.46
768	High	[K].QINVDEAVEK.[L]	1xTMTpro [K10]; 1xTMTpro [N-Term]	0.000133789	1	2	1	A0A6P6U7S4	A0A6P6U7S4 [44-53]	A0A6P6U7S4; A0A6P6UFY9	0	1753	10	84.9	80.6	87.1	107.3	111.7	111.2	106.7	110.5	121.9	105.4	103.5	101.8	153.2	203.5	234.7	301.5	154	395.6	307.8	340.2	391.8	207	352.3	273.1	2	877.008	5.83	0.00511	30.0198	7.779e-05	1.746e-06	3.69
769	High	[R].QLNGDAAENILEAVR.[D]	1xTMTpro [N-Term]	0.000133789	1	2	2	A0A6P6UF55	A0A6P6UF55 [144-158]	A0A6P6UF55; A0A6P6U9A3	0	1917.04	15	80.6	114.5	107.1	107.9	94.8	101.2	90.3	87.2	88	82.1	135.5	110	144.4	287.1	286.6	301.2	129.8	357.6	258.9	266.7	280.9	160.2	458.1	293.2	3	639.688	6.39	0.00408	44.9143	7.779e-05	1.587e-09	4.03
770	High	[R].QINDDQGPMEEQR.[H]	1xTMTpro [N-Term]	0.000133789	1	1	1	A0A6P6SUY5	A0A6P6SUY5 [227-239]	A0A6P6SUY5	0	1863.88	13	92.1	105.8	97.6	95.4	62.8	73.7	113.2	103.5	96.4	56.7	95.3	90.5	112.4	180.6	177.7	181.4	58.5	177.3	220.9	215.5	209.6	75.3	219.3	164.2	2	932.451	6.03	0.00562	15.3276	7.779e-05	5.381e-06	3.54
771	High	[K].QLNAPLHVVDPEVTDIIELEK.[A]	1xTMTpro [K21]; 1xTMTpro [N-Term]	0.000133789	1	2	2	A0A6P6TLR0	A0A6P6TLR0 [51-71]	A0A6P6T9A9; A0A6P6TLR0	0	2980.69	21	115	104.6	117.4	90.3	112.8	94.4	81.3	84.7	86.8	97	73	72.6	191.4	243.6	291.7	234.2	143.4	309.7	216.4	240.6	257.2	175.6	229.3	179.6	3	994.243	10.03	0.00996	49.2354	7.779e-05	2.198e-09	5.38
772	High	[K].QIIQNTETSLSANQK.[R]	1xTMTpro [K15]; 1xTMTpro [N-Term]	0.000133789	1	2	3	A0A6P6X5T5	A0A6P6X5T5 [958-972]	A0A6P6X5T5; A0A6P6X541	0	2283.28	15	97.3	108.5	101.9	94.8	105.1	92.9	98.6	96.6	96.5	112.4	105.4	111.1	286.1	446.2	447.2	434.1	235.9	538.4	463.7	484.8	505.3	359.4	584.7	485.5	2	1142.15	7.09	0.0081	32.0128	7.779e-05	8.693e-13	6.03
773	High	[K].QIIQDINEEKK.[S]	2xTMTpro [K10; K11]; 1xTMTpro [N-Term]	0.000133789	2	2	6	A0A6P6V7K7; A0A6P6VDR0	A0A6P6V7K7 [72-82]; A0A6P6VDR0 [72-82]	A0A6P6V7K7; A0A6P6VDR0	1	2270.35	11	72.1	71.3	71	154	166.7	164.3	98.6	96.7	106.8	97.2	87.2	77.1	438.3	606.2	644	1457.3	773.4	1967.8	957.8	1002.1	1155.8	642.6	999.6	696.3	3	757.461	5.89	0.00446	34.0212	7.779e-05	2.85e-09	3.53
774	High	[K].QIIQDINEEK.[K]	1xTMTpro [K10]; 1xTMTpro [N-Term]	0.000133789	2	2	3	A0A6P6V7K7; A0A6P6VDR0	A0A6P6V7K7 [72-81]; A0A6P6VDR0 [72-81]	A0A6P6V7K7; A0A6P6VDR0	0	1838.05	10	85.8	77.7	83	136.8	140.3	160.8	92	94.3	109	92.4	81.7	87.1	410.7	520.4	593	1020.3	513	1517.3	704.2	770.6	929.7	481.3	737.6	620	2	919.535	6.21	0.00571	36.143	7.779e-05	8.391e-07	4.09
775	High	[K].QLIPTGEILPVK.[G]	1xTMTpro [K12]; 1xTMTpro [N-Term]	0.000133789	1	1	5	A0A6P6WJH1	A0A6P6WJH1 [222-233]	A0A6P6WJH1	0	1916.21	12	130.7	105	97.9	99.5	127.9	107.5	106.3	102.3	104.1	85.5	84	79.9	451.8	507.8	505.3	535.8	337.6	732.7	587.3	603.7	640.8	321.6	548	410.7	2	958.614	6.92	0.00663	47.6244	7.779e-05	4.542e-07	3.82
776	High	[K].QLIFTFPEDAATSTGAPFWSAPK.[R]	1xTMTpro [K23]; 1xTMTpro [N-Term]	0.000133789	1	3	1	A0A6P6UJ40	A0A6P6UJ40 [830-852]	A0A6P6W9G5; A0A6P6UJ40; A0A6P6UJ50	0	3090.64	23	56.7	66.2	69.2	116.5	147.2	127.1	100.8	110.4	117.6	185	139.6	147.8	71.8	117.4	130.9	229.9	142.5	317.5	204.3	238.8	265.5	255.1	333.7	278.4	3	1030.89	8.48	0.00874	53.3488	7.779e-05	4.828e-13	4.56
777	High	[R].QLLELIDTR.[E]	1xTMTpro [N-Term]	0.000133789	1	2	1	A0A6P6T8I1	A0A6P6T8I1 [44-52]	A0A6P6T8I1; A0A6P6THM3	0	1404.84	9	84.5	88.7	90.2	120.4	73.7	117.7	122.6	141.4	127	99.6	126	131.9	46.7	68.6	74.4	103.7	31.1	128.2	108.4	133.4	125	59.9	131.4	108.4	2	702.928	7.67	0.00539	47.4352	7.779e-05	0.0001654	2.54
778	High	[R].QLIDQVVSTALPESK.[S]	1xTMTpro [K15]; 1xTMTpro [N-Term]	0.000133789	1	1	1	A0A6P6W6X9	A0A6P6W6X9 [983-997]	A0A6P6W6X9	0	2236.3	15	100.8	82.6	110.3	113.6	125.2	110.3	98.1	105	91.9	144.4	115.6	148	60.5	69.4	98.8	106.2	57.4	130.4	94.1	107.5	98.2	94.3	130.9	132	3	746.112	6.96	0.00519	48.635	7.779e-05	1.149e-07	4.18
779	High	[K].QILDENYSLGK.[MS]	1xTMTpro [K11]; 1xTMTpro [N-Term]	0.000133789	1	4	2	A0A6P6VT71	A0A6P6VT71 [110-120]	A0A6P6VT71; A0A6P6UQL3; A0A6P6WG64; A0A6P6UGD4	0	1888.07	11	97.1	83.9	95.8	129.1	126.8	129.1	103.8	110.5	105.8	125.9	118.7	128.3	237.6	287	349.8	491.7	236.8	622.1	405.8	461	460.7	335.1	547.6	466.4	2	944.535	-1.98	-0.00187	39.5509	7.779e-05	1.808e-07	4.73
780	High	[R].QLLDDTNTYK.[S]	1xTMTpro [K10]; 1xTMTpro [N-Term]	0.000133789	1	2	1	A0A6P6SI46	A0A6P6SI46 [50-59]	A0A6P6SK71; A0A6P6SI46	0	1819.01	10	110.1	97.6	97.7	84.3	91.2	96.6	84.1	89.1	102.6	86.2	86.7	80.9	204.1	253.1	270.5	243.5	129.1	352.9	249.4	281.9	338.7	173.9	303.4	223	2	910.015	6.86	0.00624	33.4572	7.779e-05	6.29e-07	3.98
781	High	[K].QLICFQPIEVDCY.[-]	2xCarbamidomethyl [C4; C12]; 1xTMTpro [N-Term]	0.000133789	1	1	4	A0A6P6TDZ9	A0A6P6TDZ9 [107-119]	A0A6P6TDZ9	0	1988.98	13	127.7	139.1	148	86.2	56.5	90	71.5	67.9	77.6	52.6	75.2	65.1	256.9	391.5	444.2	269.9	86.8	356.6	230.1	232.9	277.8	115.1	285.2	194.6	3	663.667	4.1	0.00272	51.3039	7.779e-05	7.492e-05	2.85
782	High	[K].QLKGDLEASAASTFELQR.[K]	1xTMTpro [K3]; 1xTMTpro [N-Term]	0.000133789	1	2	2	A0A6P6STU3	A0A6P6STU3 [19-36]	A0A6P6STU3; A0A6P6SGX2	1	2572.42	18	100.3	87.4	96.3	88.1	100	89.4	78	77.8	94.9	91.8	84	60.2	235.6	287.2	337.8	322.5	179.4	413.8	292.9	311.9	397	234.7	372.1	210.1	3	858.152	7.64	0.00655	42.3798	7.779e-05	1.642e-11	4.49
783	High	[K].QLGADETVK.[V]	1xTMTpro [K9]; 1xTMTpro [N-Term]	0.000133789	2	2	2	A0A6P6WTY8; A0A6P6V5Q3	A0A6P6WTY8 [224-232]; A0A6P6V5Q3 [224-232]	A0A6P6WTY8; A0A6P6V5Q3	0	1568.91	9	109.7	122.7	142.9	102.6	109.5	98.1	73.6	74.4	81.6	70.5	74.1	64.1	324.4	507.8	630.8	472.5	247.4	571.5	348	375.3	429.9	226.9	413.6	281.8	2	784.963	2.52	0.00198	21.7188	7.779e-05	4.962e-05	3.4
784	High	[K].QLFQDTGSPLIPLAEFR.[E]	1xTMTpro [N-Term]	0.000133789	1	1	1	A0A6P6TLY1	A0A6P6TLY1 [51-67]	A0A6P6TLY1	0	2236.23	17	80.1	83.1	74.8	83.7	87.6	100.4	100.8	103.9	102.4	101.4	117.9	99.3	83.7	121.5	116.7	136.2	69.9	206.8	168.4	185.3	190.6	115.3	232.5	154.3	2	1118.63	7.03	0.00786	52.2494	7.779e-05	1.696e-08	3.02
785	High	[R].QIFNGVFLK.[V]	1xTMTpro [K9]; 1xTMTpro [N-Term]	0.000133789	2	4	1	A0A6P6XC72; A0A6P6X790	A0A6P6XC72 [111-119]; A0A6P6X790 [111-119]	A0A6P6VF64; A0A6P6XC72; A0A6P6X790; A0A6P6XG02	0	1674.02	9	81.6	82.1	85.2	129.2	183.8	130.7	91.3	91	82.2	123.5	104.1	122.7	20.4	28.7	31.8	50.3	35.1	64.4	36.5	38.8	36.6	33.6	49.1	45.6	3	558.683	6.44	0.00359	47.8581	7.779e-05	1.963e-05	3.04
786	High	[R].QLETLDEEEKPK.[V]	2xTMTpro [K10; K12]; 1xTMTpro [N-Term]	0.000133789	1	3	2	A0A6P6WNT3	A0A6P6WNT3 [201-212]	A0A6P6WNT3; A0A6P6WWV3; A0A6P6WWU1	0	2371.35	12	78.2	78	75.9	102.3	96.4	95.8	130.1	135.5	126	146	121.8	146.4	141.9	198.1	205.6	289.1	133.6	342.5	377.6	419.6	407.3	288.4	416.9	395	4	593.595	1.13	0.00067	27.2284	7.779e-05	1.237e-05	3.38
787	High	[K].QLELEDIQR.[L]	1xTMTpro [N-Term]	0.000133789	2	3	1	A0A6P6WN22; A0A6P6WVX8	A0A6P6WN22 [94-102]; A0A6P6WVX8 [94-102]	A0A6P6WN22; A0A6P6WVX8; A0A6P6WMZ6	0	1447.81	9	88.3	98	87.3	112.9	88.7	116.3	112.8	122.7	118.2	112.6	115.9	121.6	63.2	98.1	93.2	125.8	48.5	164	129.1	149.8	150.6	87.7	156.4	129.3	2	724.412	5.8	0.0042	31.3363	7.779e-05	9.96e-05	2.59
788	High	[R].QLEFIEIQEEYVKDELK.[N]	2xTMTpro [K13; K17]; 1xTMTpro [N-Term]	0.000133789	1	2	3	A0A6P6UMB1	A0A6P6UMB1 [49-65]	A0A6P6UMB1; A0A6P6WDF2	1	3065.72	17	79.4	72.8	85.6	99.3	110.8	117	100.2	88.9	119.2	135.1	97.7	92.8	406	520.8	653.4	791.5	433.1	1179.3	819.2	776.2	1085.6	752.1	942.9	706	3	1022.59	6.77	0.00692	49.9367	7.779e-05	7.964e-14	5.81
789	High	[K].QLEELALALK.[N]	1xTMTpro [K10]; 1xTMTpro [N-Term]	0.000133789	1	6	1	A0A6P6VBK2	A0A6P6VBK2 [287-296]	A0A6P6VBK2; A0A6P6UXN0; A0A6P6VB99; A0A6P6VB95; A0A6P6UYQ7; A0A6P6VAK5	0	1736.08	10	84	67.4	70.3	83.4	119.2	76.5	70.1	70.2	69.3	118.7	64.4	83.7	58	65.1	72.5	89.7	62.9	104.1	77.4	82.7	85.2	89.2	83.9	85.9	3	579.37	7.91	0.00457	50.7335	7.779e-05	3.825e-05	2.58
790	High	[K].QIEEAFKDFTTR.[E]	1xTMTpro [K7]; 1xTMTpro [N-Term]	0.000133789	1	1	1	A0A6P6UAA0	A0A6P6UAA0 [54-65]	A0A6P6UAA0	1	2093.15	12	106.3	96.8	119.4	126.3	124.3	119.9	106.5	111.3	115.5	135.4	120.9	116.7	37.5	47.8	62.9	69.4	33.5	83.4	60.1	67	72.6	52	80.5	61.2	3	698.395	9.06	0.00632	43.7808	7.779e-05	1.408e-05	2.68
791	High	[K].NVLATTHEGFPYLR.[V]	1xTMTpro [N-Term]	0.000133789	1	1	1	A0A6P6V4Z1	A0A6P6V4Z1 [397-410]	A0A6P6V4Z1	0	1922.05	14	112.4	159.9	123.3	91.1	97.6	94.7	103.6	103.8	101.6	63.6	82.4	91	37.4	74.4	61.2	47.2	24.8	62.1	55.1	58.9	60.2	23	51.7	45	3	641.358	6.92	0.00443	39.152	7.779e-05	3.143e-08	4.21
792	High	[K].NVIATDTSPK.[Q]	1xTMTpro [K10]; 1xTMTpro [N-Term]	0.000133789	2	2	2	A0A6P6SJ44; A0A6P6SV27	A0A6P6SJ44 [57-66]; A0A6P6SV27 [57-66]	A0A6P6SJ44; A0A6P6SV27	0	1653.97	10	61.3	83.7	76.6	90.7	76.3	95.2	104.9	116	122.4	129.8	130.6	113.6	150	286.3	279.4	345.6	142.5	458.6	410.1	484	532.8	345.2	602.3	412.8	2	827.49	4.22	0.00349	19.8621	7.779e-05	6.823e-06	3.17
793	High	[R].NVLAPAAPYVR.[K]	1xTMTpro [N-Term]	0.000133789	1	2	1	A0A6P6VDJ4	A0A6P6VDJ4 [223-233]	A0A6P6VDJ4; A0A6P6TIN2	0	1474.87	11	86.2	101.3	85.7	80.1	73.9	84.6	92.6	100.3	96.1	72.4	100.3	93.8	131.1	215.6	194.7	189.7	85.9	253.5	225.3	260.4	260.4	119.9	287.8	212.2	2	737.943	5.75	0.00424	34.3293	7.779e-05	7.821e-05	2.8
794	High	[K].NIDVLLVEQEVVGDDR.[T]	1xTMTpro [N-Term]	0.000133789	1	2	1	A0A6P6TIW2	A0A6P6TIW2 [224-239]	A0A6P6TCV1; A0A6P6TIW2	0	2117.14	16	79.2	118.3	110.7	95.7	99.7	110.9	105.1	94	105.5	95.5	118.2	100	26.3	55	54.9	49.5	25.3	72.6	55.8	53.3	62.4	34.5	74.1	49.4	3	706.39	7.22	0.0051	49.8572	7.779e-05	1.575e-08	4.88
795	High	[K].NIDTANTLSR.[G]	1xTMTpro [N-Term]	0.000133789	2	2	2	A0A6P6XFH3; A0A6P6X673	A0A6P6XFH3 [468-477]; A0A6P6X673 [468-477]	A0A6P6XFH3; A0A6P6X673	0	1408.77	10	96.5	120.7	110	96.4	41.3	101.8	107.8	106	91.8	45.3	118.1	93.1	172.7	302.4	293.8	268.9	56.5	359.3	308.6	323.8	292.6	88.3	399	247.7	2	704.893	5.47	0.00385	17.0939	7.779e-05	1.327e-05	3.49
796	High	[R].NLDSLNLGGR.[L]	1xTMTpro [N-Term]	0.000133789	2	4	2	A0A6P6VRN4; A0A6P6WCB6	A0A6P6VRN4 [225-234]; A0A6P6WCB6 [225-234]	A0A6P6VRN4; A0A6P6WCB6; A0A6P6VRB7; A0A6P6VQ54	0	1362.77	10	93	121.7	114.5	91.5	52.8	96.8	120.7	107.8	116.3	54.4	121.3	87.4	179.9	329.1	330.4	275.6	77.9	369	373.1	355.7	400.6	114.5	442.6	251.1	2	681.891	6.98	0.00476	31.3104	7.779e-05	5.893e-05	2.58
797	High	[R].NIDQVLLEFK.[E]	1xTMTpro [K10]; 1xTMTpro [N-Term]	0.000133789	1	2	1	A0A6P6TRV6	A0A6P6TRV6 [350-359]	A0A6P6TRV6; A0A6P6U1P5	0	1827.09	10	76.3	64.6	84	113.2	199.2	82.9	97.2	83.8	72.1	170.8	132.1	215.9	18.3	21.7	30.1	42.3	36.5	39.2	37.3	34.3	30.8	44.6	59.8	77	3	609.705	6.7	0.00408	51.1477	7.779e-05	5.653e-05	2.86
798	High	[R].NLDGSGVSDLYR.[LV]	1xTMTpro [N-Term]	0.000133789	1	2	1	A0A6P6VBZ2	A0A6P6VBZ2 [197-208]	A0A6P6VBZ2; A0A6P6V409	0	1599.83	12	79.8	91.1	92.5	93.5	85.9	109.8	95.8	97.7	104.1	97	122.1	109.9	163.6	261.1	283	298.3	134.4	443.4	313.8	341.6	380	216.2	472.1	334.9	2	800.42	1.37	0.0011	28.4953	7.779e-05	0.0002701	2.42
799	High	[K].NLDFYLGDIR.[N]	1xTMTpro [N-Term]	0.000133789	1	2	1	A0A6P6TT85	A0A6P6TT85 [61-70]	A0A6P6TT85; A0A6P6U2X1	0	1529.83	10	87	148.2	132.7	92.2	32.5	105.8	97.6	91.3	97.4	35.7	102	68.6	86.2	205.4	196.3	142.3	24.6	206.6	154.6	154.3	171.8	38.5	190.7	101	2	765.422	5.58	0.00427	46.3552	7.779e-05	1.005e-05	3.09
800	High	[K].NLDDSINDDKLR.[E]	1xTMTpro [K10]; 1xTMTpro [N-Term]	0.000133789	2	4	2	A0A6P6WBY2; A0A6P6VSD8	A0A6P6WBY2 [319-330]; A0A6P6VSD8 [321-332]	A0A6P6WBY2; A0A6P6VSD8; A0A6P6WD28; A0A6P6VTZ6	1	2026.11	12	88	97.4	111	87.3	82.8	99.1	101.8	94.6	116.5	77.5	97.5	82	229.3	355.2	431.6	354.4	164.8	508.8	424.1	420.5	540.7	219.7	479.3	317.5	3	676.04	-0.24	-0.00016	25.1548	7.779e-05	1.761e-09	4.06
801	High	[K].NLAYVGGNMFEAIPPADAVLMK.[WV]	1xOxidation [M9]; 1xTMTpro [K22]; 1xTMTpro [N-Term]	0.000133789	1	4	2	A0A6P6WWV0	A0A6P6WWV0 [240-261]	A0A6P6WR62; A0A6P6WWC7; A0A6P6WWV0; A0A6P6WQQ4	0	2945.58	22	93.1	112.4	95.9	84.5	92.8	96.1	99.8	102.1	102.5	100.8	102.8	92.3	241.6	408	371.3	341.5	184	491.5	414.1	452.1	473.7	284.5	503.4	356.2	3	982.538	7.66	0.00752	49.8592	7.779e-05	8.868e-07	4.17
802	High	[R].NLASLGVEAANIPAYR.[S]	1xTMTpro [N-Term]	0.000133789	1	2	1	A0A6P6TAX8	A0A6P6TAX8 [731-746]	A0A6P6TAX8; A0A6P6TK50	0	1963.09	16	114.7	116.4	110.6	109.9	181.7	102.9	101.4	93.2	84.7	114.7	88.3	87.7	116.7	165.7	168	174.1	141.2	206.4	164.9	161.8	153.5	127	169.4	132.6	3	655.037	2.11	0.00138	44.6472	7.779e-05	5.731e-07	4.4
803	High	[R].NLAGEIAQEYAK.[R]	1xTMTpro [K12]; 1xTMTpro [N-Term]	0.000133789	1	1	2	A0A6P6S789	A0A6P6S789 [160-171]	A0A6P6S789	0	1915.08	12	65.8	82.1	81.4	84.6	87.9	98	92.8	99.8	96	110.6	106.2	101.2	156.3	272.8	288.7	312.9	159.5	459	352.5	404.4	406	285.8	475.8	357.5	2	958.049	7.08	0.00678	41.7857	7.779e-05	1.809e-07	3.01
804	High	[R].NKPLAVIGGGDSAMEEATFLTK.[Y]	2xTMTpro [K2; K22]; 1xTMTpro [N-Term]	0.000133789	1	2	2	A0A6P6TLS1	A0A6P6TLS1 [196-217]	A0A6P6TBC0; A0A6P6TLS1	0	3161.77	22	89.8	91.8	90.4	78.6	109.6	98.2	90.7	89.5	108.9	97.7	88.6	73.5	255.1	365	383.1	347.9	237.8	549.7	411.9	433.9	551.1	302	474.7	310.2	3	1054.61	10.07	0.01061	46.6431	7.779e-05	7.009e-11	4.66
805	High	[R].NKLTGSIPDSFGR.[F]	1xTMTpro [K2]; 1xTMTpro [N-Term]	0.000133789	2	2	1	A0A6P6SXP3; A0A6P6SMX9	A0A6P6SXP3 [180-192]; A0A6P6SMX9 [180-192]	A0A6P6SXP3; A0A6P6SMX9	1	2000.14	13	130.4	118.2	140.8	76.7	83.7	85.9	73.3	72.6	81.3	53.9	65.5	42.1	252.2	319.7	406.2	231	123.6	327.2	226.7	239.6	280	113.3	239	120.9	3	667.392	9.29	0.00619	33.9203	7.779e-05	3.73e-06	2.8
806	High	[R].NKLEGDASFLFGK.[N]	2xTMTpro [K2; K13]; 1xTMTpro [N-Term]	0.000133789	2	2	2	A0A6P6SU38; A0A6P6SXP3	A0A6P6SU38 [235-247]; A0A6P6SXP3 [229-241]	A0A6P6SU38; A0A6P6SXP3	1	2338.36	13	118.1	108.5	118.3	103.5	127.5	93.4	73.4	63.2	68.7	84	76	67.8	257	330.4	384.4	350.8	212	400.6	255.4	234.7	266.2	198.8	311.9	219.3	3	780.131	8.35	0.00651	45.5547	7.779e-05	2.648e-10	4.65
807	High	[R].NKEFPWGPDGLFEEK.[H]	2xTMTpro [K2; K15]; 1xTMTpro [N-Term]	0.000133789	1	1	1	A0A6P6TDR7	A0A6P6TDR7 [85-99]	A0A6P6TDR7	1	2705.48	15	86	95.8	101.2	112.4	137.4	122.3	92.9	98.4	102	136.5	111.7	105.7	134.7	210	236.6	274.3	164.4	377.7	232.8	263.1	284.6	232.6	330.2	246.2	3	902.505	8.95	0.00807	46.4916	7.779e-05	1.671e-08	4.98
808	High	[R].NKEDLEEIFSK.[N]	2xTMTpro [K2; K11]; 1xTMTpro [N-Term]	0.000133789	1	2	2	A0A6P6TT85	A0A6P6TT85 [71-81]	A0A6P6TT85; A0A6P6U2X1	1	2264.3	11	101.7	112	124.7	102.5	138.3	118.1	78.9	78	89.8	91.1	73.2	66.5	438.3	674.9	802.2	687.9	455.2	1002.5	543.2	573.1	689	427.2	595.2	426.1	3	755.443	8.47	0.0064	43.5522	7.779e-05	6.954e-07	4.21
809	High	[R].NHYVEGGDAGNREDYINELIR.[R]	1xTMTpro [N-Term]	0.000133789	2	3	2	A0A6P6XC72; A0A6P6X790	A0A6P6XC72 [220-240]; A0A6P6X790 [220-240]	A0A6P6XC72; A0A6P6X790; A0A6P6XG02	1	2738.35	21	89.7	122.5	93.4	87.1	75.7	100.9	96.6	98.8	100.9	72.1	98	65.9	158.5	302.9	246.4	239.9	102.2	351.5	273.1	297.9	317.6	138.7	326.9	173.1	3	913.457	4.43	0.00404	31.7744	7.779e-05	1.849e-10	4.88
810	High	[K].NHVELVELLGIADTEK.[G]	1xTMTpro [K16]; 1xTMTpro [N-Term]	0.000133789	1	2	1	A0A6P6WLM4	A0A6P6WLM4 [193-208]	A0A6P6WLM4; A0A6P6W0G5	0	2388.36	16	73	57.7	68.7	117	187	127.2	88.6	80.4	107.8	201.2	122	126.6	59.9	66.3	84.2	149.6	117.2	205.7	116.3	112.6	157.6	179.7	188.9	154.4	3	796.799	8.77	0.00698	47.8203	7.779e-05	1.315e-11	5.49
811	High	[R].NHIVTDWDVPR.[L]	1xTMTpro [N-Term]	0.000133789	1	2	1	A0A6P6SFE8	A0A6P6SFE8 [353-363]	A0A6P6SFD2; A0A6P6SFE8	0	1655.88	11	101.8	103.3	107.4	74.4	92.4	82.4	72.7	94	82.2	75.1	78.1	75	122.5	173.9	192.8	139.3	84.9	195.4	139.8	192.9	176.1	98.3	177.2	134.1	3	552.636	7.16	0.00395	27.275	7.779e-05	2.484e-05	3.48
812	High	[R].NHLFVPGPVNIPDQIIR.[A]	1xTMTpro [N-Term]	0.000133789	1	1	1	A0A6P6TM10	A0A6P6TM10 [10-26]	A0A6P6TM10	0	2233.28	17	82.4	97.3	88.8	66.6	78.8	78.2	77.1	73.9	78.4	71.5	72.8	66.7	85.8	141.8	138.1	108.1	62.7	160.6	128.4	131.3	145.5	81	143.1	103.3	3	745.102	6.01	0.00447	45.5318	7.779e-05	2.049e-07	4.6
813	High	[K].NGVEEVLGLGPLSDYEKEGLEALKPELK.[S]	3xTMTpro [K17; K24; K28]; 1xTMTpro [N-Term]	0.000133789	1	2	2	A0A6P6SFT8	A0A6P6SFT8 [311-338]	A0A6P6SFT8; A0A6P6S800	1	4243.42	28	121.3	84.8	101.1	107.3	130.8	113.4	98.6	95.9	118.2	157	88.1	78.6	309.4	302.8	385	426.5	254.9	570.3	402.3	417.2	537	435.8	423.8	298.1	5	849.492	2.65	0.00225	53.0461	7.779e-05	6.635e-07	4.06
814	High	[K].NGVEEVLGLGPLSDYEK.[E]	1xTMTpro [K17]; 1xTMTpro [N-Term]	0.000133789	1	2	2	A0A6P6SFT8	A0A6P6SFT8 [311-327]	A0A6P6SFT8; A0A6P6S800	0	2427.33	17	88.9	95.9	102.8	98.1	107.7	94.7	89.4	82.9	93.5	106	92.9	112.8	141	212.8	243.3	242.2	130.4	295.8	226.5	224.2	264.1	182.9	277.8	265.9	3	809.788	9.58	0.00775	49.2076	7.779e-05	1.345e-10	5.04
815	High	[K].NGTFHTEQAIEYGTK.[M]	1xTMTpro [K15]; 1xTMTpro [N-Term]	0.000133789	1	1	1	A0A6P6VAZ5	A0A6P6VAZ5 [57-71]	A0A6P6VAZ5	0	2304.21	15	77.9	85.6	79.9	94.8	135.8	107.1	87.5	87.6	93.4	114.8	84.3	84.5	144.1	221.5	220.6	273.1	191.7	390.3	258.7	276.2	307.6	230.9	293.9	232.2	3	768.749	8.53	0.00655	24.4486	7.779e-05	4.673e-10	5.63
816	High	[K].NGNTGYDEIR.[A]	1xTMTpro [N-Term]	0.000133789	1	2	1	A0A6P6VVB6	A0A6P6VVB6 [299-308]	A0A6P6VVB6; A0A6P6VV67	0	1442.72	10	93.7	129	105.4	87.2	35	89	112.6	107.5	100.5	40.4	102	82.6	228.8	440.6	384.3	331.6	65.2	428.5	439.5	447.7	437.1	107.4	469.9	299.9	2	721.869	7.48	0.00539	13.9333	7.779e-05	4.142e-05	3.08
817	High	[R].NGILEAYSGIFQGFK.[N]	1xTMTpro [K15]; 1xTMTpro [N-Term]	0.000133789	3	4	1	A0A6P6W3T8; A0A6P6VKL0; A0A6P6T4N4	A0A6P6W3T8 [764-778]; A0A6P6VKL0 [764-778]; A0A6P6T4N4 [764-778]	A0A6P6W3T8; A0A6P6VKL0; A0A6P6T4N4; A0A6P6W688	0	2252.26	15	90.8	93.8	101.1	105.9	132.1	100.7	108.4	104.4	115.1	153.9	132.6	139.1	53.2	76.9	88.4	96.6	59.1	116.2	101.5	104.3	120.1	98.1	146.5	121.1	3	751.429	7.5	0.00563	53.2966	7.779e-05	6.744e-07	2.74
818	High	[R].NGLETYVYNMK.[N]	1xOxidation [M10]; 1xTMTpro [K11]; 1xTMTpro [N-Term]	0.000133789	1	1	1	A0A6P6TVI9	A0A6P6TVI9 [572-582]	A0A6P6TVI9	0	1956.04	11	104.9	99.6	93.1	90.9	140.9	90.9	93.1	92.6	88.7	133.2	90.6	109.3	114	151.5	151.1	154	117	194.8	161.9	171.7	171.7	157.6	185.8	176.6	3	652.688	5.3	0.00346	34.68	7.779e-05	6.397e-05	3.52
819	High	[K].NGKPTDVVLGYDSVK.[E]	2xTMTpro [K3; K15]; 1xTMTpro [N-Term]	0.000133789	3	3	2	A0A6P6WJH1; A0A6P6VYK5; A0A6P6VV49	A0A6P6WJH1 [57-71]; A0A6P6VYK5 [57-71]; A0A6P6VV49 [57-71]	A0A6P6WJH1; A0A6P6VYK5; A0A6P6VV49	0	2504.45	15	88.8	88	81.9	88.7	128.1	86.8	96.3	86.9	92.8	111.2	88.2	140.4	327.1	453.3	450.3	508.6	360.3	630.3	567.2	546.4	608.5	445.7	613.2	768.8	3	835.496	8.22	0.00687	36.0831	7.779e-05	5.85e-08	4.32
820	High	[K].NGHVEIIANDQGNR.[I]	1xTMTpro [N-Term]	0.000133789	2	3	5	A0A6P6TVI9; A0A6P6W685	A0A6P6TVI9 [55-68]; A0A6P6W685 [99-112]	A0A6P6TVI9; A0A6P6W685; A0A6P6VNL7	0	1840.96	14	109.9	90.6	95.1	143.2	96.9	107.4	125.3	117.2	100	88	112.3	108.9	228.1	263	294.7	462.8	153.6	439.4	415.9	415.1	369.5	198.7	439.5	336	2	920.986	3.21	0.00296	14.6201	7.779e-05	6.816e-10	3.67
821	High	[R].NGGVVPPSCCGGIR.[GS]	2xCarbamidomethyl [C9; C10]; 1xTMTpro [N-Term]	0.000133789	2	2	11	A0A6P6SN27; A0A6P6SYC1	A0A6P6SN27 [46-59]; A0A6P6SYC1 [46-59]	A0A6P6SN27; A0A6P6SYC1	0	1733.87	14	104.2	142.6	121.6	88.3	56.7	99.3	117.5	116.4	114.1	58.8	113.1	82	847.5	1623.3	1476.1	1118.4	352.4	1591.7	1528.4	1615.4	1652.7	520.7	1735.1	991.5	2	867.448	7.78	0.00674	18.4062	7.779e-05	7.113e-07	2.83
822	High	[K].NGGIDTEQDYPFK.[G]	1xTMTpro [K13]; 1xTMTpro [N-Term]	0.000133789	1	1	2	A0A6P6UNT0	A0A6P6UNT0 [199-211]	A0A6P6UNT0	0	2092.08	13	86.6	109.4	98.7	81.6	92	94.8	92.8	103.6	98	121.2	115.3	105	207.5	366.7	352.8	304.5	168.4	447.5	355.4	423.7	418.2	315.9	521.2	374.1	2	1046.54	-1.04	-0.00109	34.1767	7.779e-05	1.057e-06	3.76
823	High	[K].NIDYACGAGADCAPILQNGACFNPNTVR.[D]	3xCarbamidomethyl [C6; C12; C21]; 1xTMTpro [N-Term]	0.000133789	1	1	1	A0A6P6V5C8	A0A6P6V5C8 [37-64]	A0A6P6V5C8	0	3343.56	28	88.4	112.4	94.4	80.7	60.7	90.9	102.5	94.4	98.8	62.4	95.9	64	82	145.9	130.7	116.6	43	166.1	152	149.4	163.2	63	167.8	88.2	4	836.653	9.36	0.00782	42.753	7.779e-05	1.272e-10	6.75
824	High	[K].NGGIDSEEDYPYHAR.[G]	1xTMTpro [N-Term]	0.000133789	1	2	1	A0A6P6VTS0	A0A6P6VTS0 [210-224]	A0A6P6VTS0; A0A6P6WBD9	0	2026.94	15	90.8	92.4	89.7	93.9	75.8	80.7	107.5	95.1	88.8	73	95.9	77.9	86.5	123.2	127.6	139.4	55.2	151.6	163.8	154.7	150.7	75.7	172.5	110.4	3	676.324	7.67	0.00518	15.8469	7.779e-05	0.0001037	3.61
825	High	[K].NIDYACGAGADCAPILQNGPCFNPNTIR.[D]	3xCarbamidomethyl [C6; C12; C21]; 1xTMTpro [N-Term]	0.000133789	1	1	2	A0A6P6VB81	A0A6P6VB81 [37-64]	A0A6P6VB81	0	3383.59	28	97.2	138.2	112.5	92.1	65.6	101.7	114.2	109.5	120.6	79.7	114	85.8	107.8	214.6	186.4	159.2	55.6	222.3	202.6	207.4	238.3	96.2	238.6	141.6	3	1128.54	7.05	0.00795	44.2165	7.779e-05	2.636e-14	5.95
826	High	[R].NLEAGIPALLEDGIK.[L]	1xTMTpro [K15]; 1xTMTpro [N-Term]	0.000133789	1	1	2	A0A6P6WA68	A0A6P6WA68 [392-406]	A0A6P6WA68	0	2161.27	15	107.4	111.2	112.2	88.6	102.9	80.2	114	102.5	105.4	115.6	100.6	97	168.5	244.1	262.7	216.3	123.3	247.9	285.8	274.2	294.3	197.3	297.6	226.2	3	721.099	5.08	0.00366	50.6079	7.779e-05	2.675e-07	4.87
827	High	[K].NILLELEESNEK.[H]	1xTMTpro [K12]; 1xTMTpro [N-Term]	0.000133789	1	1	1	A0A6P6UV84	A0A6P6UV84 [79-90]	A0A6P6UV84	0	2039.15	12	81.9	56.6	73	101.8	169.8	89	84.5	81.9	88.2	164.7	97	125.5	59.1	57.1	78.6	114.4	93.6	126.5	97.5	100.9	113.3	129.3	132.1	134.6	3	680.394	7.83	0.00532	48.2414	7.779e-05	0.0003089	2.84
828	High	[K].NIIIATGSDVK.[GS]	1xTMTpro [K11]; 1xTMTpro [N-Term]	0.000133789	2	2	2	A0A6P6X039; A0A6P6WK79	A0A6P6X039 [177-187]; A0A6P6WK79 [177-187]	A0A6P6X039; A0A6P6WK79	0	1739.06	11	80.7	93.1	83.3	99.7	97.2	98.2	104.9	105	100.4	131.5	135.5	130.9	234.6	378.6	361.3	451.1	215.8	562.3	487.4	520.6	519.6	415.7	743.1	565.3	2	870.039	8.83	0.00768	37.3667	7.779e-05	3.738e-07	3.89
829	High	[R].NLIEILEENHPIDISK.[Y]	1xTMTpro [K16]; 1xTMTpro [N-Term]	0.000133789	1	1	2	A0A6P6TTZ5	A0A6P6TTZ5 [7-22]	A0A6P6TTZ5	0	2485.42	16	109.2	108.1	120.1	90.5	134.1	90.3	92.8	95.7	97.9	108.5	90.1	85.9	83.9	116.2	137.8	108.3	78.7	136.8	114	125.5	134	90.7	130.6	98.1	3	829.151	9.28	0.00769	49.4138	7.779e-05	1.838e-07	4.3
830	High	[R].NILELAAELR.[V]	1xTMTpro [N-Term]	0.000133789	1	1	1	A0A6P6XFM5	A0A6P6XFM5 [662-671]	A0A6P6XFM5	0	1445.86	10	79.5	100.9	93.2	80	68.1	76.6	85.2	82.4	79.6	52.7	94.1	92.3	62.4	110.8	109.1	97.8	40.8	118.5	106.9	110.3	111.2	45	139.3	107.7	2	723.442	8.6	0.00621	51.1095	7.779e-05	2.509e-06	2.93
831	High	[R].NILEEIVWHK.[D]	1xTMTpro [K10]; 1xTMTpro [N-Term]	0.000133789	1	2	1	A0A6P6X9W8	A0A6P6X9W8 [120-129]	A0A6P6X9W8; A0A6P6X1S3	0	1889.11	10	75.7	68.2	76.9	119.9	151.2	142.4	97.1	84.8	110.1	133.7	127.5	128.1	35	44.1	53.1	86.4	53.4	129.8	71.8	66.9	90.7	67.3	111.2	88.1	3	630.38	6.53	0.00411	48.8434	7.779e-05	1.735e-06	3.76
832	High	[K].NLLEEEAIK.[V]	1xTMTpro [K9]; 1xTMTpro [N-Term]	0.000133789	1	1	2	A0A385CIB6	A0A385CIB6 [234-242]	A0A385CIB6	0	1666.99	9	108	97.4	134.5	92.1	86.8	93.4	81	85.9	94.6	82.2	77	75.1	233.9	295.3	435.1	310.7	143.6	398.9	280.6	317.7	365.2	193.9	314.7	242	3	556.338	8.3	0.00461	39.6881	7.779e-05	8.349e-05	3.28
833	High	[R].NILDVDKER.[M]	1xTMTpro [K7]; 1xTMTpro [N-Term]	0.000133789	1	2	1	A0A6P6U8U4	A0A6P6U8U4 [116-124]	A0A6P6U8U4; A0A6P6UFA3	1	1710	9	106.3	122.1	119.6	96.1	82.8	91.6	75.4	88.4	76.3	74.1	78.8	83.4	159.1	255.7	267.1	224.1	94.6	270.2	180.5	225.8	203.4	120.7	222.4	185.6	3	570.674	1.95	0.00111	26.5656	7.779e-05	0.0001658	3.7
834	High	[K].NLLDVADNLSR.[A]	1xTMTpro [N-Term]	0.000133789	1	8	2	A0A6P6SDV2	A0A6P6SDV2 [199-209]	A0A6P6SDV2; A0A6P6XJ17; A0A6P6SET3; A0A6P6SDP9; A0A6P6SFD5; A0A6P6SDD5; A0A6P6XLP3; A0A6P6SEH5	0	1533.86	11	71.6	97.2	90.9	102.8	47.5	123.1	104.6	108	110.7	47.6	133.6	94.1	104.9	199.2	198.8	234.7	53.2	355.4	245.2	270.1	289	75.9	369.3	204.9	2	767.437	7.36	0.00564	44.4088	7.779e-05	1.169e-06	3.95
835	High	[R].NLIDAAEQEYEKEK.[L]	2xTMTpro [K12; K14]; 1xTMTpro [N-Term]	0.000133789	1	1	2	A0A6P6T372	A0A6P6T372 [414-427]	A0A6P6T372	1	2592.43	14	53.4	56.4	63.2	133.6	131.4	136.3	73.7	89.4	95.2	168.1	116.6	117.4	84.5	125	149.4	329.6	158.9	425.5	186.7	241.7	268.6	289.7	348.4	276.4	3	864.82	3.97	0.00343	42.9909	7.779e-05	1.022e-08	3.81
836	High	[R].NLIDAAEQEYEK.[E]	1xTMTpro [K12]; 1xTMTpro [N-Term]	0.000133789	1	1	1	A0A6P6T372	A0A6P6T372 [414-425]	A0A6P6T372	0	2031.09	12	88.7	84.8	100.5	101.3	119.9	118.6	96.7	93.7	99.4	122.8	110.3	120.6	56.4	75.4	95.3	100.3	58.2	148.5	98.3	101.6	112.5	84.9	132.2	113.9	3	677.708	9.44	0.00639	42.4335	7.779e-05	9.458e-06	2.83
837	High	[K].NILAPGVADPHGLWHNCK.[L]	1xCarbamidomethyl [C17]; 1xTMTpro [K18]; 1xTMTpro [N-Term]	0.000133789	2	2	1	A0A6P6U5Y9; A0A6P6TRF4	A0A6P6U5Y9 [276-293]; A0A6P6TRF4 [276-293]	A0A6P6U5Y9; A0A6P6TRF4	0	2607.41	18	75.8	95.3	89.4	104.3	116.4	109.5	103.9	92.5	110.4	117.2	103.9	98.4	59.9	105.4	105.5	128.5	70.3	170.6	131.4	124.8	155.4	100.8	154.9	115.7	4	652.614	9.11	0.00594	38.5858	7.779e-05	0.0003738	4.37
838	High	[R].NILAEINEASR.[L]	1xTMTpro [N-Term]	0.000133789	1	2	1	A0A6P6T1E1	A0A6P6T1E1 [137-147]	A0A6P6T1E1; A0A6P6T1D6	0	1533.86	11	101.2	101.8	111.1	92	84.2	97.5	101.5	102.6	104.3	83.9	115.3	87.8	25.5	35.9	41.8	36.1	16.2	48.4	40.9	44.1	46.8	23	54.8	32.9	3	511.961	7.79	0.00398	42.6824	7.779e-05	3.418e-05	3.62
839	High	[K].NLGTLWEDLGK.[A]	1xTMTpro [K11]; 1xTMTpro [N-Term]	0.000133789	1	2	1	A0A6P6W261	A0A6P6W261 [61-71]	A0A6P6VYR2; A0A6P6W261	0	1854.06	11	99.2	80.2	83.7	79.3	117.8	101.8	73.7	78.2	84.7	101.2	69.4	72.1	72	81.5	90.7	89.7	65.3	145.7	85.5	96.9	109.5	79.9	95	77.8	3	618.697	8.4	0.00519	49.8364	7.779e-05	9.511e-06	3.75
840	High	[K].NLGSIPTQQDRR.[T]	1xTMTpro [N-Term]	0.000133789	1	1	47	A0A6P6T982	A0A6P6T982 [56-67]	A0A6P6T982	1	1688.94	12	98.2	138.8	108.1	84.8	50.2	94.2	122.4	124	115.8	52.1	104.2	73.6	2502.6	4948	4109.5	3364.8	977.1	4728.3	4986.8	5390.3	5254.6	1444	5006	2785.6	3	563.654	5.72	0.00322	14.9509	7.779e-05	9.215e-06	4.11
841	High	[K].NLGSIPTQQDR.[R]	1xTMTpro [N-Term]	0.000133789	1	1	56	A0A6P6T982	A0A6P6T982 [56-66]	A0A6P6T982	0	1532.84	11	92.3	128.8	108	87.4	55	99.7	115.2	113.2	113.6	56.1	106.4	83.9	3047.8	5955.1	5325.8	4497.4	1387.8	6490.2	6084.8	6381.9	6684.7	2016.4	6630.6	4120.3	2	766.926	6.02	0.00461	59.9536	7.779e-05	5.243e-06	2.86
842	High	[R].NIFSGFDDQLLADAFNVDLKIIQK.[L]	2xTMTpro [K20; K24]; 1xTMTpro [N-Term]	0.000133789	1	1	4	A0A6P6WMC4	A0A6P6WMC4 [229-252]	A0A6P6WMC4	1	3637.05	24	114.3	115.6	112.8	94.2	106.9	110.8	113.2	106	112.3	108.3	102.3	91.6	116.2	164.4	171.2	149.1	83	221.9	184	183.9	203.3	119.8	196.1	138.4	4	910.026	10.02	0.00911	55.8272	7.779e-05	5.765e-09	4.1
843	High	[R].NIFSGFDDQLLADAFNVDLKIIQK.[L]	1xTMTpro [K24]; 1xTMTpro [N-Term]	0.000133789	1	1	10	A0A6P6WMC4	A0A6P6WMC4 [229-252]	A0A6P6WMC4	1	3332.84	24	133.1	130.8	131.3	77.6	95.2	82.8	103.6	98.4	108.7	105.7	94.5	91.1	217	298.4	319.5	196.9	118.5	265.9	270.1	273.8	315.6	187.4	290.6	220.7	3	1111.61	-4.65	-0.00517	55.2817	7.779e-05	2.091e-09	4.19
844	High	[R].NIFSGFDDQLLADAFNVDLK.[I]	1xTMTpro [K20]; 1xTMTpro [N-Term]	0.000133789	1	1	172	A0A6P6WMC4	A0A6P6WMC4 [229-248]	A0A6P6WMC4	0	2850.52	20	120.3	132.1	121.6	76.2	105.6	91.1	108.2	106.7	118.2	104	90.7	76.1	6853.2	10528.5	10335.9	6762.7	4594.4	10226.4	9857.4	10369.5	11988.4	6447.1	9742.1	6443.8	2	1425.77	5.73	0.00816	54.4679	7.779e-05	3.747e-14	5.33
845	High	[R].NIFSGFDDQLLADAFNVDLK.[I]	1xTMTpro [K20]	0.000133789	1	1	10	A0A6P6WMC4	A0A6P6WMC4 [229-248]	A0A6P6WMC4	0	2546.31	20	130.9	95.6	103.1	79	183.6	80.7	88	79.8	95.1	179	77.2	79.9	450.6	460.5	530	423.6	482.8	547.7	484.4	468.9	583.2	670.5	501.8	409.2	2	1273.67	8.28	0.01054	54.5012	7.779e-05	3.947e-08	4.81
846	High	[R].NIFQANILEPACK.[F]	1xCarbamidomethyl [C12]; 1xTMTpro [K13]; 1xTMTpro [N-Term]	0.000133789	1	4	1	A0A6P6TVA2	A0A6P6TVA2 [262-274]	A0A6P6TVA2; A0A6P6TP39; A0A6P6TKT7; A0A6P6TKU4	0	2126.19	13	119.7	121.1	104.3	88.1	96.1	103.3	100.9	112.6	111.5	113.4	102.4	80	94.1	133.2	122.4	107.9	57.7	160.1	126.9	151.1	156.1	97	151.9	93.5	2	1063.61	8.87	0.00943	46.6955	7.779e-05	0.0003992	1.88
847	High	[R].NLFEFDLSKVEFPNSLTYLDLNHNK.[V]	2xTMTpro [K9; K25]; 1xTMTpro [N-Term]	0.000133789	1	1	1	A0A6P6SMX9	A0A6P6SMX9 [253-277]	A0A6P6SMX9	1	3910.12	25	117.3	121.2	143.1	91.4	118.3	97.3	88.5	84.1	79.8	115.6	90.5	71.2	132.4	191.4	241	160.6	102	216.3	159.7	161.9	160.4	142	192.6	119.5	4	978.29	4.32	0.00422	52.5451	7.779e-05	1.576e-08	4
848	High	[R].NLFEFDLSKVEFPDSLTNLDLNHNK.[I]	2xTMTpro [K9; K25]; 1xTMTpro [N-Term]	0.000133789	1	1	1	A0A6P6SXP3	A0A6P6SXP3 [253-277]	A0A6P6SXP3	1	3862.08	25	160	122.9	152.5	70.2	105.1	81.1	86.2	75.3	71.1	64.9	55.2	37.9	96.1	103.3	136.7	65.7	48.2	96	82.8	77.2	76	42.4	62.5	33.8	5	773.23	9.21	0.00711	51.772	7.779e-05	6.553e-09	4.69
849	High	[R].NLFEFDLSK.[V]	1xTMTpro [K9]; 1xTMTpro [N-Term]	0.000133789	2	2	2	A0A6P6SXP3; A0A6P6SMX9	A0A6P6SXP3 [253-261]; A0A6P6SMX9 [253-261]	A0A6P6SXP3; A0A6P6SMX9	0	1720.98	9	151.4	156.4	197.8	84.6	84.6	78.4	56.9	55.3	54.8	44.1	52.9	58.7	333.7	482.3	650.8	290.5	142.4	340.7	200.4	208.1	215.3	105.8	220.2	192.3	2	861	9.62	0.00827	48.4296	7.779e-05	4.635e-05	3.45
850	High	[K].NLFEEGGDWERK.[N]	1xTMTpro [K12]; 1xTMTpro [N-Term]	0.000133789	1	1	1	A0A6P6X6D0	A0A6P6X6D0 [163-174]	A0A6P6X6D0	1	2088.1	12	78.6	96.5	94.9	90.1	86.7	106	96.7	82.4	96.7	85.3	93.3	71.4	75.7	130	136.5	135.2	63.8	201.3	149	135.5	165.9	89.4	169.5	102.2	3	696.706	2.07	0.00144	36.6567	7.779e-05	0.000294	2.81
851	High	[K].NIETWGGLMGEGYDYFER.[G]	1xTMTpro [N-Term]	0.000133789	1	2	2	A0A6P6T6B6	A0A6P6T6B6 [72-89]	A0A6P6T6B6; A0A6P6TGN6	0	2441.14	18	106.6	135.3	138.8	67.6	76.8	81.9	78.2	79.3	88.4	74.3	76.5	56.9	395.3	702.2	768.5	390.4	217.5	598.4	463.6	501.5	584	299.9	535	313.8	2	1221.09	11.56	0.01411	49.9213	7.779e-05	5.673e-09	3.86
852	High	[R].NIEQHASDNVNK.[I]	1xTMTpro [K12]; 1xTMTpro [N-Term]	0.000133789	1	5	1	A0A6P6T3A0	A0A6P6T3A0 [112-123]	A0A6P6VRH0; A0A6P6T3A0; A0A6P6W208; A0A6P6W6P1; A0A6P6UB46	0	1977.06	12	97.9	63.3	59.4	101.4	349.4	63.8	68.5	68.7	58.8	197	60.7	90	135.8	122.9	123.1	219.1	370.3	174.5	152	162.7	145.2	297.5	158.9	185.6	3	659.696	4.95	0.00326	13.1835	7.779e-05	8.29e-09	5.06
853	High	[K].NIEIGIIGNDRK.[F]	1xTMTpro [K12]; 1xTMTpro [N-Term]	0.000133789	2	2	3	A0A6P6TIZ5; A0A6P6XFK0	A0A6P6TIZ5 [207-218]; A0A6P6XFK0 [207-218]	A0A6P6TIZ5; A0A6P6XFK0	1	1950.16	12	100.7	105.9	98.3	93.1	103.5	109	103.1	104.3	100.9	98.5	96.2	87.3	387.7	570.4	564.8	557.8	304.2	826.4	634.2	685.1	691.5	412.4	698.2	499.3	3	650.731	7.97	0.00518	35.7168	7.779e-05	1.339e-06	3.43
854	High	[R].NLEEIILASDGAMVAR.[G]	1xTMTpro [N-Term]	0.000133789	1	1	1	A0A6P6WLR2	A0A6P6WLR2 [356-371]	A0A6P6WLR2	0	2006.09	16	127.7	132	140.9	88.1	152.9	101.2	123.9	102.5	120.8	160.5	101.1	90.6	45.7	66.1	75.3	49.1	41.8	71.4	70.9	62.6	77	62.5	68.3	48.2	3	669.374	8.8	0.00589	50.4555	7.779e-05	9.302e-06	2.55
855	High	[K].NLEDGDIEPAPK.[L]	1xTMTpro [K12]; 1xTMTpro [N-Term]	0.000133789	1	2	2	A0A6P6WUE4	A0A6P6WUE4 [737-748]	A0A6P6WUE4; A0A6P6WR44	0	1906.04	12	97.8	96	87.3	88.3	116.3	109.1	113.3	104.7	104	102.5	94.6	93.9	229.6	315.3	306.1	323.1	208.6	504.9	425.3	419.7	434.9	261.8	418.9	327.9	2	953.533	9.4	0.00896	28.7443	7.779e-05	7.381e-07	2.85
856	High	[K].NLEAELDEK.[T]	1xTMTpro [K9]; 1xTMTpro [N-Term]	0.000133789	1	2	1	A0A6P6U6Y4	A0A6P6U6Y4 [155-163]	A0A6P6U6Y4; A0A6P6UCU2	0	1668.93	9	83.3	79.9	75.5	86.1	107.6	85.1	90.2	85.3	89	98.3	93.1	94.1	150.5	202	203.5	242.2	148.4	302.9	260.5	263	286.2	193.1	317.1	252.6	2	834.972	4.6	0.00384	34.3791	7.779e-05	0.0002282	2.5
857	High	[R].NLISQDPNSPFPAEAGR.[Y]	1xTMTpro [N-Term]	0.000133789	1	2	1	A0A6P6UBP8	A0A6P6UBP8 [63-79]	A0A6P6UBP8; A0A6P6UCH5	0	2117.09	17	81.4	103.6	102	84.9	87.8	94.1	113	103.6	103.2	92.8	111	108.5	65.6	116.7	122.6	106.5	54	149.3	145.5	142.4	148.1	81.3	168.6	129.9	3	706.375	6.86	0.00484	35.8654	7.779e-05	1.52e-09	4.58
858	High	[R].NGGLAPGGFNFDAK.[L]	1xTMTpro [K14]; 1xTMTpro [N-Term]	0.000133789	1	2	1	A0A6P6SLN3	A0A6P6SLN3 [370-383]	A0A6P6SLN3; A0A6P6T3H8	0	1973.07	14	103.6	93.5	89.6	78.9	120.1	86.4	85.9	89.7	98.4	103.4	89	81.4	78.8	99.5	101.8	93.5	69.8	129.5	104.5	116.5	133.4	85.6	127.7	92.1	3	658.367	6.97	0.00458	42.0101	7.779e-05	2.28e-05	3.68
859	High	[K].NGESQVGLK.[Q]	1xTMTpro [K9]; 1xTMTpro [N-Term]	0.000133789	2	2	1	A0A6P6SRX8; A0A6P6T2I9	A0A6P6SRX8 [275-283]; A0A6P6T2I9 [275-283]	A0A6P6SRX8; A0A6P6T2I9	0	1539.9	9	71.3	88.1	80.5	85.9	61.4	90	110.9	121.4	111.7	192.4	169.7	175.9	135.7	234.6	228.7	254.7	89.3	337.4	337.4	394.1	378.7	398.4	609.3	497.7	2	770.456	4.27	0.00329	19.9865	7.779e-05	0.0001496	2.28
860	High	[K].NDLPTEIVAK.[T]	1xTMTpro [K10]; 1xTMTpro [N-Term]	0.000133789	2	3	3	A0A6P6SLM7; A0A6P6STU2	A0A6P6SLM7 [178-187]; A0A6P6STU2 [178-187]	A0A6P6SLM7; A0A6P6STU2; A0A6P6ST65	0	1708.01	10	95	108.3	116.3	83.3	105.9	87.8	83.3	83.7	80.4	76.6	91.1	80.7	464.5	740.4	848.6	634.2	395.2	845.2	650.8	697.6	699.5	407.5	839.5	586.2	2	854.518	8.69	0.00742	37.8523	7.779e-05	6.673e-06	3.32
861	High	[R].NDGSWPSNCDEGSSFDESEVSDLVK.[R]	1xCarbamidomethyl [C9]; 1xTMTpro [K25]; 1xTMTpro [N-Term]	0.000133789	1	1	1	A0A6P6V2L5	A0A6P6V2L5 [69-93]	A0A6P6V2L5	0	3368.54	25	79.8	87.1	74.7	89.2	113.6	94.4	79.7	81.5	87.2	118.7	91	107.9	89.5	136.7	125	155.8	97.3	208.6	143	156	174.2	144.9	192.6	179.8	4	842.895	7.01	0.0059	44.1301	7.779e-05	1.917e-05	3.24
862	High	[R].NDGIHIINLAK.[T]	1xTMTpro [K11]; 1xTMTpro [N-Term]	0.000133789	1	2	1	A0A6P6XEV0	A0A6P6XEV0 [45-55]	A0A6P6XEV0; A0A6P6XFY5	0	1816.09	11	94.6	85.8	67.5	88.2	108.3	80.1	101.1	86.6	85.1	129.2	139.4	154.9	56.4	71.6	60.1	81.9	49.3	94.1	96.4	88.1	90.3	83.8	156.8	137.3	3	606.04	7.27	0.0044	37.6561	7.779e-05	0.0001102	2.02
863	High	[R].NDGHIHNEQMFPADVFATGAGHVNPPR.[A]	1xOxidation [M10]; 1xTMTpro [N-Term]	0.000133789	1	1	2	A0A6P6TWC7	A0A6P6TWC7 [1350-1376]	A0A6P6TWC7	0	3248.56	27	85.6	88.5	80.4	81.4	97.3	86.3	90.1	96.4	92.2	94.9	82.8	65.3	142.6	206.4	199.9	211.4	123.8	283.5	240.2	274.1	273.6	172.1	260.4	161.7	5	650.521	3.96	0.00257	28.0075	7.779e-05	5.289e-10	5.69
864	High	[K].NDFTPEEEEEVRR.[E]	1xTMTpro [N-Term]	0.000133789	1	2	1	A0A6P6U986	A0A6P6U986 [184-196]	A0A6P6U986; A0A6P6UGF5	1	1953.95	13	109.3	170.6	134.2	116.6	70	131.8	151.9	137.4	143.3	63.4	136.8	119.9	33.1	72.3	60.7	55	16.2	78.7	73.6	71	77.3	20.9	78.2	54	3	651.991	5.37	0.00349	16.4443	7.779e-05	5.874e-10	4.72
865	High	[K].NDEHSIIGEATIEANSVYGALR.[G]	1xTMTpro [N-Term]	0.000133789	1	2	1	A0A6P6W7R8	A0A6P6W7R8 [141-162]	A0A6P6VNH1; A0A6P6W7R8	0	2663.36	22	104.3	145.3	126.6	83.3	76	114.9	107.3	99.8	115.6	67.8	105.9	70.3	45.1	87.9	81.7	56.1	25.1	97.9	74.2	73.6	89	31.9	86.4	45.2	3	888.466	9.37	0.00832	46.3311	7.779e-05	4.488e-12	5.17
866	High	[K].NDEDVIGSLDGLSEK.[E]	1xTMTpro [K15]; 1xTMTpro [N-Term]	0.000133789	2	2	1	A0A6P6TYG4; A0A6P6TMB6	A0A6P6TYG4 [62-76]; A0A6P6TMB6 [101-115]	A0A6P6TYG4; A0A6P6TMB6	0	2199.16	15	141.4	121.5	136.5	90	119.5	97.2	93.3	83.9	112.2	143.1	92.4	127.5	32.7	39.3	47.1	32.4	21.1	44.3	34.5	33.1	46.2	36	40.3	43.8	3	733.733	9.59	0.00703	44.169	7.779e-05	4.366e-06	2.83
867	High	[R].NDANCPAHGFYTYEAFIAAAR.[S]	1xCarbamidomethyl [C5]; 1xTMTpro [N-Term]	0.000133789	2	2	1	A0A6P6TL51; A0A6P6TAJ5	A0A6P6TL51 [39-59]; A0A6P6TAJ5 [39-59]	A0A6P6TL51; A0A6P6TAJ5	0	2663.26	21	86	143.6	107.8	71.9	52.2	90.6	104.2	105.1	104.1	74.8	180.7	139.7	46.6	108.9	87.2	60.7	21.6	96.8	90.3	97.2	100.5	44.1	184.7	112.5	3	888.434	8.58	0.00762	44.4817	7.779e-05	1.545e-12	6.94
868	High	[R].NCDNFQVTK.[N]	1xCarbamidomethyl [C2]; 1xTMTpro [K9]; 1xTMTpro [N-Term]	0.000133789	2	3	1	A0A6P6S719; A0A6P6SDL4	A0A6P6S719 [53-61]; A0A6P6SDL4 [166-174]	A0A6P6S719; A0A6P6SDL4; A0A6P6S618	0	1733.91	9	73.5	95.9	82.9	105	100.9	106.5	109.6	101.7	104.4	97	109.9	102.4	105	191.8	176.9	233.7	110.1	300	250.5	248	265.7	150.8	296.3	217.5	2	867.465	5.07	0.00439	24.5884	7.779e-05	2.231e-05	3.31
869	High	[K].NAWGEAYEQLVAAIK.[T]	1xTMTpro [K15]; 1xTMTpro [N-Term]	0.000133789	1	2	1	A0A6P6VIF7	A0A6P6VIF7 [453-467]	A0A6P6VIF7; A0A6P6WBD7	0	2271.26	15	46.9	41.1	44.9	112.4	205.4	125.4	92	88.3	100.5	158.3	107.6	106	58	71.1	82.8	216.4	193.9	305.5	181.8	186.2	221.2	212.9	250.9	194.7	3	757.765	8.07	0.00611	53.607	7.779e-05	4.644e-09	5.07
870	High	[K].NAWESMGSDFERLEEYGLGPR.[D]	1xTMTpro [N-Term]	0.000133789	1	1	1	A0A6P6WAK8	A0A6P6WAK8 [785-805]	A0A6P6WAK8	1	2747.31	21	106.3	105.7	101.6	89.7	119.8	91.4	103.6	100.6	103.8	104.8	100.3	94.7	74.7	104	106.6	98.2	64.3	126.6	116.5	120.7	129.9	80.2	133	99	4	687.587	7.51	0.00516	48.8724	7.779e-05	5.988e-05	3.17
871	High	[K].NAWDFAVSR.[R]	1xTMTpro [N-Term]	0.000133789	1	1	1	A0A6P6TD99	A0A6P6TD99 [146-154]	A0A6P6TD99	0	1369.72	9	79.3	119.6	98.8	86.8	55	94.1	81.3	87.9	83.5	62.4	91.9	79.5	64.9	137	120.8	110.7	34.4	151.9	106.5	122.8	121.8	55.6	142	96.7	2	685.369	8.87	0.00608	36.6522	7.779e-05	0.000346	2.27
872	High	[K].NAVVTVPAYFNDSQR.[Q]	1xTMTpro [N-Term]	0.000133789	4	7	10	A0A6P6W7K1; A0A6P6UA78; A0A6P6VP42; A0A6P6U8W3	A0A6P6W7K1 [145-159]; A0A6P6UA78 [145-159]; A0A6P6VP42 [145-159]; A0A6P6U8W3 [145-159]	A0A6P6VRC5; A0A6P6W7K1; A0A6P6UA78; A0A6P6W6K4; A0A6P6VP42; A0A6P6U8W3; A0A6P6VP37	0	1985.04	15	84.9	101.3	87.6	74.3	81.3	84.6	93.8	88.6	91.7	78.2	94.2	80.2	782.1	1305	1204.4	1065.3	572.1	1535.5	1381.3	1391.8	1503.9	783.7	1636.7	1097.9	2	993.03	5.92	0.00587	38.341	7.779e-05	2.097e-08	3.35
873	High	[K].NAVVTVPAYFNDSQR.[Q]		0.000133789	4	7	1	A0A6P6W7K1; A0A6P6UA78; A0A6P6VP42; A0A6P6U8W3	A0A6P6W7K1 [145-159]; A0A6P6UA78 [145-159]; A0A6P6VP42 [145-159]; A0A6P6U8W3 [145-159]	A0A6P6VRC5; A0A6P6W7K1; A0A6P6UA78; A0A6P6W6K4; A0A6P6VP42; A0A6P6U8W3; A0A6P6VP37	0	1680.83	15																									2	840.928	8.22	0.00691	32.9913	7.779e-05	6.861e-05	2.28
874	High	[K].NAVITVPAYFNDSQR.[Q]	1xTMTpro [N-Term]	0.000133789	1	5	2	A0A6P6X2U6	A0A6P6X2U6 [145-159]	A0A6P6X2U6; A0A6P6S8V4; A0A6P6S7W0; A0A6P6X4Y9; A0A6P6S8U9	0	1999.06	15	88.1	136.6	116.5	111.2	45.4	142.4	125.4	123.8	134.3	62.4	169.3	116	76.9	166.8	151.8	151.2	30.3	244.9	175	184.4	208.8	59.3	278.8	150.5	2	1000.04	5.74	0.00574	42.6422	7.779e-05	2.465e-09	3.64
875	High	[K].NAVFGDSSALAPGGVR.[I]	1xTMTpro [N-Term]	0.000133789	1	2	2	A0A6P6WQB2	A0A6P6WQB2 [432-447]	A0A6P6X009; A0A6P6WQB2	0	1821.98	16	99.1	123.1	113.7	93	83.4	110.4	109.5	116.8	114.1	76.1	111.8	90	220.3	382.8	377.2	322	141.5	483.5	389.1	443	451.6	184.1	468.7	297.2	2	911.501	9.18	0.00836	35.9083	7.779e-05	1.177e-09	4.97
876	High	[R].NAVDPTTEVVYSEKPDAEFVK.[S]	2xTMTpro [K14; K21]; 1xTMTpro [N-Term]	0.000133789	1	2	2	A0A6P6SI03	A0A6P6SI03 [481-501]	A0A6P6SI03; A0A6P6SGB2	0	3250.77	21	85.1	96.6	111.8	91.1	118	102.5	84.9	91	94.1	122.4	97.1	98.7	379.9	603.2	744.7	633.4	402.3	901.7	605.9	693.1	748	594.1	817.5	654.7	3	1084.27	5.71	0.00618	41.5693	7.779e-05	2.492e-15	6.22
877	High	[R].NATPGSTLGDDYFISR.[L]	1xTMTpro [N-Term]	0.000133789	1	2	1	A0A6P6VRC7	A0A6P6VRC7 [248-263]	A0A6P6VRC7; A0A6P6W8H3	0	2018.02	16	92.4	108.4	101	71.6	119.1	78.7	87.8	88	90.7	79.3	73.7	62.6	239.7	393.6	391	289.3	236	402.2	364.3	389.6	419.1	223.8	360.8	241.5	2	1009.52	4.39	0.00443	36.7677	7.779e-05	1.36e-08	4.59
878	High	[K].NATLTNEKEVDAHPIR.[A]	1xTMTpro [K8]; 1xTMTpro [N-Term]	0.000133789	1	4	2	A0A6P6U1Q3	A0A6P6U1Q3 [464-479]	A0A6P6S6Q4; A0A6P6U1Q3; A0A6P6TR19; A0A6P6SES8	1	2416.34	16	56.7	67.1	64.7	108.3	142.7	123.2	94	103.4	101.1	157	130.9	89.8	94	155.6	160.2	279.8	180.8	402.8	249.4	292.6	298.5	283.3	409.6	221.5	3	806.126	8.17	0.00658	17.9315	7.779e-05	2.351e-09	4.01
879	High	[K].NATLTNEK.[E]	1xTMTpro [K8]; 1xTMTpro [N-Term]	0.000133789	1	4	1	A0A6P6U1Q3	A0A6P6U1Q3 [464-471]	A0A6P6S6Q4; A0A6P6U1Q3; A0A6P6TR19; A0A6P6SES8	0	1498.87	8	80.2	90.4	78.1	131.7	89.6	94.6	112.8	124.4	98.5	120.6	137.7	234.1	58.6	92.4	85.1	149.8	50	136.2	131.7	155	128.1	95.8	189.7	254.1	2	749.944	6.3	0.00472	17.4329	7.779e-05	0.0001113	3.26
880	High	[K].NANGSNFDTPDSAR.[L]	1xTMTpro [N-Term]	0.000133789	1	4	1	A0A6P6UFM9	A0A6P6UFM9 [416-429]	A0A6P6UFM9; A0A6P6UB93; A0A6P6UGQ6; A0A6P6UAF9	0	1769.84	14	98.7	134	110.8	93.8	34.2	106.8	114.4	109.6	119.3	37.9	120.6	76.7	130.2	247.3	218.1	192.7	34.5	277.7	241.3	246.6	280.3	54.4	300	150.4	2	885.427	5.01	0.00443	13.7263	7.779e-05	3.093e-08	3.85
881	High	[K].NALQLAGSLEGIDFGFK.[E]	1xTMTpro [K17]; 1xTMTpro [N-Term]	0.000133789	1	1	1	A0A6P6V3Z4	A0A6P6V3Z4 [66-82]	A0A6P6V3Z4	0	2388.34	17	122.6	101.1	109	103	158.7	112.4	94.6	102	103.1	124.6	94.8	93.3	73.4	84.7	97.4	96.1	72.6	132.6	90.6	104.2	110	81.2	107.1	83.1	3	796.794	10.64	0.00847	53.0696	7.779e-05	1.927e-08	5.47
882	High	[R].NAIINAAELASYDQVK.[Q]	1xTMTpro [K16]; 1xTMTpro [N-Term]	0.000133789	1	2	1	A0A6P6T3D9	A0A6P6T3D9 [191-206]	A0A6P6T3D9; A0A6P6SS13	0	2328.31	16	106.7	107.7	87.1	93.1	108.5	104.6	91.3	105.2	79	107.3	83.6	104.6	52.4	74	63.8	71.2	40.7	101.2	71.7	88.1	69.1	57.3	77.4	76.3	3	776.78	9.01	0.00699	46.0984	7.779e-05	3.937e-08	4.13
883	High	[K].NALENYAYNMR.[N]	1xOxidation [M10]; 1xTMTpro [N-Term]	0.000133789	5	6	2	A0A6P6UA78; A0A6P6T4P4; A0A6P6VP42; A0A6P6U8W3; A0A6P6SRY0	A0A6P6UA78 [546-556]; A0A6P6T4P4 [545-555]; A0A6P6VP42 [546-556]; A0A6P6U8W3 [546-556]; A0A6P6SRY0 [545-555]	A0A6P6UA78; A0A6P6T4P4; A0A6P6W6K4; A0A6P6VP42; A0A6P6U8W3; A0A6P6SRY0	0	1678.82	11	103	140.9	128.2	82.4	37.7	98	114.4	119	115	44.4	121.6	81.7	313.5	600.1	582.4	390.8	87.6	587.9	556.9	617.9	623.3	146.9	697.9	369.6	2	839.921	10.6	0.0089	23.857	7.779e-05	5.012e-06	2.94
884	High	[K].NALAAGADKDEEDSEGR.[T]	1xTMTpro [K9]; 1xTMTpro [N-Term]	0.000133789	2	2	1	A0A6P6VTK7; A0A6P6WHA8	A0A6P6VTK7 [263-279]; A0A6P6WHA8 [269-285]	A0A6P6VTK7; A0A6P6WHA8	1	2356.19	17	83.6	92.2	108.6	113.4	80	90.5	102.3	107.1	103	101.5	119.8	128.7	191.6	295.6	371.2	404.7	140	408.5	374.6	418.8	420.2	253.1	517.9	438.1	3	786.075	10.34	0.00812	17.2915	7.779e-05	1.226e-13	5.4
885	High	[K].NAGVQLIEGR.[G]	1xTMTpro [N-Term]	0.000133789	1	1	2	A0A6P6UY44	A0A6P6UY44 [211-220]	A0A6P6UY44	0	1360.79	10	91.8	131.2	108.9	81.2	43.9	89.8	108.9	105.9	102.9	42.5	99.3	66.7	127.6	255.1	226	175.7	46.6	246.1	242	251.2	254.7	64.2	260.5	137.9	2	680.903	8.98	0.00611	25.8318	7.779e-05	1.491e-05	2.87
886	High	[K].NAGVNGSVVSEK.[V]	1xTMTpro [K12]; 1xTMTpro [N-Term]	0.000133789	1	1	1	A0A6P6T372	A0A6P6T372 [522-533]	A0A6P6T372	0	1769	12	66.6	96	87.2	125.3	132.1	126.4	108	108.3	111	123.3	129.5	120.1	108.7	219.4	212.6	318.8	164.8	406.7	281.9	301.8	322.9	219	399	291.5	2	885.01	3.89	0.00344	19.714	7.779e-05	2.112e-09	4.18
887	High	[K].NAGGLSNSELADIFADWNR.[G]	1xTMTpro [N-Term]	0.000133789	1	2	1	A0A6P6TZS3	A0A6P6TZS3 [212-230]	A0A6P6TZS3; A0A6P6TUB6	0	2354.17	19	87.4	132.6	110.7	99.2	99	104.2	99.9	91.9	105	111.2	106.2	103.7	42.2	89.6	79.8	74.6	36.5	99.2	77.1	75.7	90.3	58.4	96.7	74.4	3	785.402	9.02	0.00708	51.2932	7.779e-05	2.182e-07	4.64
888	High	[R].NAFDAETEKELSLAVGDFVVVR.[Q]	1xTMTpro [K9]; 1xTMTpro [N-Term]	0.000133789	1	1	1	A0A6P6UAZ2	A0A6P6UAZ2 [287-308]	A0A6P6UAZ2	1	3017.64	22	97.7	110.4	110.5	96.4	107.4	112.4	110.5	107.3	116.2	111.9	112.9	90.1	192.8	304.9	325.5	296.4	161.8	437.2	348.6	361.4	408.4	240.3	420.4	264.2	3	1006.56	7.13	0.00717	52.3276	7.779e-05	7.072e-13	3.86
889	High	[R].NDLVLALPDR.[I]	1xTMTpro [N-Term]	0.000133789	1	2	1	A0A6P6T2V8	A0A6P6T2V8 [107-116]	A0A6P6T2V8; A0A6P6SYF6	0	1429.83	10	105.7	167.4	142.4	86.8	47.8	102.3	123.8	117.2	119.2	56.9	117.5	96	46.6	103.3	93.7	59.6	16.1	88.9	87.3	88.2	93.6	27.3	97.7	62.9	2	715.424	5.82	0.00416	42.2579	7.779e-05	5.209e-05	2.74
890	High	[K].NGGGLAVDLDGKPAAHYYER.[D]	1xTMTpro [K12]; 1xTMTpro [N-Term]	0.000133789	1	1	1	A0A6P6TKB7	A0A6P6TKB7 [333-352]	A0A6P6TKB7	0	2711.44	20	92.7	89	84.5	91.5	120.7	99.7	92.3	90.3	93.9	99.1	88.6	78.2	212.4	285.3	288.9	326.6	211.3	450.3	338.2	353	383.3	247.2	382.8	266.5	4	678.618	4.29	0.00291	30.6167	7.779e-05	2.927e-07	3.39
891	High	[R].NDNENVGPQGFR.[I]	1xTMTpro [N-Term]	0.000133789	2	2	2	A0A6P6X010; A0A6P6WV75	A0A6P6X010 [168-179]; A0A6P6WV75 [168-179]	A0A6P6X010; A0A6P6WV75	0	1650.82	12	88.6	127.2	107.1	104.5	52.6	113.5	98.2	96.6	88	48.7	93	76.1	129.4	259.9	233.4	237.6	58.7	326.8	229.2	240.7	228.8	77.4	256.2	165.2	2	825.918	7.74	0.00639	16.7784	7.779e-05	6.411e-06	3.59
892	High	[K].NDVMGQFHDALYLGDIQER.[V]	1xOxidation [M4]; 1xTMTpro [N-Term]	0.000133789	1	2	1	A0A6P6UPC4	A0A6P6UPC4 [729-747]	A0A6P6UPC4; A0A6P6URT7	0	2541.24	19	96.1	121.7	116.2	82.1	68.2	107.1	98.1	98.4	94.3	64.2	96.5	77.5	152.9	270.9	276	203.4	82.9	335.8	249.4	267.2	267.1	111.1	289.7	183.3	3	847.759	10.47	0.00887	40.768	7.779e-05	3.946e-09	4.86
893	High	[K].NGDFEEGPYR.[L]	1xTMTpro [N-Term]	0.000133789	2	2	5	A0A6P6VWJ2; A0A6P6WEC8	A0A6P6VWJ2 [209-218]; A0A6P6WEC8 [209-218]	A0A6P6VWJ2; A0A6P6WEC8	0	1487.71	10	84.2	110.7	98.7	82	53.1	95.3	111.5	110.2	99.2	56.7	109.8	80.9	541.9	996.6	947.9	821.1	260.9	1207.9	1146.5	1209.8	1136.5	396.5	1332.6	773.7	2	744.363	7.11	0.00529	20.6736	7.779e-05	0.0002497	3.18
894	High	[K].NGCQQTCDYR.[G]	2xCarbamidomethyl [C3; C7]; 1xTMTpro [N-Term]	0.000133789	2	2	1	A0A6P6WN40; A0A6P6WUN4	A0A6P6WN40 [701-710]; A0A6P6WUN4 [701-710]	A0A6P6WN40; A0A6P6WUN4	0	1605.71	10	104.5	152.1	125.3	91	23.5	85.1	131.5	117.1	92.6	33.2	101.2	88.7	206.6	420.6	369.7	280.2	35.5	331.4	415.7	395	325.9	71.5	377.4	260.7	2	803.361	4.83	0.00388	9.8445	7.779e-05	0.0001093	2.55
895	High	[R].NFVGQAATSPGISGQTIQESMR.[L]	1xTMTpro [N-Term]	0.000133789	2	2	1	A0A6P6VND8; A0A6P6W6X1	A0A6P6VND8 [100-121]; A0A6P6W6X1 [100-121]	A0A6P6VND8; A0A6P6W6X1	0	2583.32	22	86.4	128.7	106.9	85.7	69.7	95.7	108.2	104.2	101.6	52.2	115.4	77.7	52.6	109.6	97.1	81.3	32.4	114.8	105.3	108.2	110.2	34.6	132.5	70.3	3	861.785	9.79	0.00843	38.9872	7.779e-05	1.74e-10	6.22
896	High	[R].NFTETIELQIGLK.[N]	1xTMTpro [K13]; 1xTMTpro [N-Term]	0.000133789	1	1	2	A0A6P6SQX0	A0A6P6SQX0 [27-39]	A0A6P6SQX0	0	2114.24	13	99	97.6	106.3	114.1	191.7	126.8	92.7	87.5	91.6	118.6	85.4	86	138.3	190.7	221.6	248.2	204.5	349	207.1	208.5	227.8	180.3	225	178.5	3	705.424	10.16	0.00716	50.0543	7.779e-05	7.909e-07	3.96
897	High	[K].NFQELDAYLLKA.[-]	1xTMTpro [K11]; 1xTMTpro [N-Term]	0.000133789	2	3	7	A0A6P6V952; A0A6P6V4X9	A0A6P6V952 [139-150]; A0A6P6V4X9 [139-150]	A0A6P6V952; A0A6P6VA69; A0A6P6V4X9	1	2033.16	12	89.4	91.6	85.3	96.6	136.7	100.9	95.8	95.8	97.3	112.7	102.4	80.1	694.1	995.2	988.6	1167.5	810.7	1544.1	1189.1	1268.6	1344.8	951.6	1499.9	924.8	2	1017.09	4.14	0.00421	47.313	7.779e-05	6.527e-07	3.88
898	High	[K].NFQELDAYLLK.[A]	1xTMTpro [K11]; 1xTMTpro [N-Term]	0.000133789	2	3	8	A0A6P6V952; A0A6P6V4X9	A0A6P6V952 [139-149]; A0A6P6V4X9 [139-149]	A0A6P6V952; A0A6P6VA69; A0A6P6V4X9	0	1962.12	11	108	104.9	95.5	105.2	164.9	116.7	92.6	91.9	97.7	109.3	92.2	106.9	527.6	716.8	696.1	800.1	615.2	1123.4	723.4	766	849.8	580.9	849.6	775.8	2	981.57	6.78	0.00666	49.4786	7.779e-05	2.008e-08	3.18
899	High	[K].NFNMGLENLVK.[A]	1xOxidation [M4]; 1xTMTpro [K11]; 1xTMTpro [N-Term]	0.000133789	2	2	2	A0A6P6V0J2; A0A6P6V0E3	A0A6P6V0J2 [239-249]; A0A6P6V0E3 [239-249]	A0A6P6V0J2; A0A6P6V0E3	0	1903.06	11	105.7	127.7	128.1	98.3	128.7	103.5	84.6	86.2	90.7	67.8	70.4	64.8	274.2	463.3	495.9	397	254.9	529.1	350.8	381.5	419.1	191.4	344.5	250	3	635.03	8.69	0.00551	43.3699	7.779e-05	4.067e-05	3.33
900	High	[K].NFNMGLENLVK.[A]	1xTMTpro [K11]; 1xTMTpro [N-Term]	0.000133789	2	2	2	A0A6P6V0J2; A0A6P6V0E3	A0A6P6V0J2 [239-249]; A0A6P6V0E3 [239-249]	A0A6P6V0J2; A0A6P6V0E3	0	1887.07	11	89.8	112	114.7	88.7	117.1	100.8	82.7	85.2	86.5	76.4	80.6	68.8	236.6	412.7	450.9	364.2	235.7	523.6	348.5	383.1	405.7	219.1	400.4	269.4	2	944.043	7.3	0.00689	47.0285	7.779e-05	1.94e-06	3.22
901	High	[R].NFLQLVFSGDDSGR.[L]	1xTMTpro [N-Term]	0.000133789	1	2	2	A0A6P6VTC7	A0A6P6VTC7 [203-216]	A0A6P6VTC7; A0A6P6TVZ6	0	1858.96	14	78.7	118.8	99.5	84.9	56.9	92.1	104	100.9	90	78	112.6	93.1	98.3	207.6	185.5	165	54.3	226.6	207.6	214.9	200.2	105.9	265.2	172.7	2	929.992	7.55	0.00702	52.2972	7.779e-05	5.102e-09	3.55
902	High	[RK].NFLNHPLINEGLPQK.[D]	1xTMTpro [K15]; 1xTMTpro [N-Term]	0.000133789	1	3	1	A0A6P6WQW1	A0A6P6WQW1 [193-207]	A0A6P6WTQ8; A0A6P6WQW1; A0A6P6WXP2	0	2342.35	15	80.7	84.9	90.1	80.8	74.4	90.4	108.1	104.5	112.6	132	140.8	173.2	52	76.5	86.6	81	36.6	114.7	111.3	114.8	129.1	92.5	171	165.8	3	781.459	5.84	0.00456	42.4376	7.779e-05	4.493e-08	3.56
903	High	[R].NFLELVPEIR.[E]	1xTMTpro [N-Term]	0.000133789	1	2	1	A0A6P6VYQ9	A0A6P6VYQ9 [293-302]	A0A6P6VYQ9; A0A6P6WI42	0	1533.9	10	103.1	102.4	118.4	93.3	82.3	103.6	113.1	121.1	94.1	99.9	107.1	102.6	20	27.8	34.3	28.2	12.2	39.6	35.1	40.1	32.5	21.1	39.2	29.6	3	511.974	8.3	0.00424	50.6716	7.779e-05	0.0002994	3.01
904	High	[R].NFFDQSEMLGDPIATLR.[L]	1xTMTpro [N-Term]	0.000133789	1	2	1	A0A6P6SJ09	A0A6P6SJ09 [158-174]	A0A6P6SJ09; A0A6P6SI80	0	2258.14	17	58	57.3	65.5	88	120.5	80.4	87.8	81.5	104.2	270.5	184	243	27.4	37.9	46.2	64.8	43.5	74.9	66.3	65.7	87.7	139.1	164	170.7	3	753.394	9.51	0.00716	50.5241	7.779e-05	6.826e-07	4.03
905	High	[K].NFDEIVLDESK.[D]	1xTMTpro [K11]; 1xTMTpro [N-Term]	0.000133789	1	3	1	A0A6P6UEC6	A0A6P6UEC6 [445-455]	A0A6P6UEC6; A0A6P6U8U9; A0A6P6UA67	0	1917.05	11	121.9	131.5	156.2	108.5	140.4	94.2	121	119.1	122.1	150.9	106.4	135.3	30	45.3	57.4	41.6	26.4	45.7	47.6	50	53.5	40.4	49.4	49.5	3	639.692	8.52	0.00544	43.7642	7.779e-05	7.696e-05	3.16
906	High	[R].NFAFVQFELQEDATR.[A]	1xTMTpro [N-Term]	0.000133789	1	3	1	A0A6P6WHS0	A0A6P6WHS0 [140-154]	A0A6P6WHS0; A0A6P6WI17; A0A6P6WKH8	0	2119.08	15	97.9	122.9	111.5	88.1	91.8	105	104.2	102.1	108.8	95	101.7	91	63.1	110.8	107.2	88.4	45.2	133.3	107.3	112.2	124.8	66.6	123.6	87.2	3	707.038	9.84	0.00695	47.7479	7.779e-05	2.99e-06	4.02
907	High	[K].NEVIVVDNYFTGSK.[D]	1xTMTpro [K14]; 1xTMTpro [N-Term]	0.000133789	1	3	2	A0A6P6W6U1	A0A6P6W6U1 [111-124]	A0A6P6W6U1; A0A6P6VPK8; A0A6P6VP64	0	2193.2	14	82.4	94.9	80.4	95.8	140.8	100.3	98.9	92.8	92.3	117.4	91.6	108.3	239.5	386.3	349.1	434	312.7	574.7	459.7	460.4	478.1	371.5	502.3	468.2	3	731.745	7.84	0.00573	45.0369	7.779e-05	4.122e-07	3.59
908	High	[R].NETNDAITSAYDAFNSWK.[K]	1xTMTpro [K18]; 1xTMTpro [N-Term]	0.000133789	1	2	1	A0A6P6WWI2	A0A6P6WWI2 [104-121]	A0A6P6WWI2; A0A6P6SC42	0	2655.32	18																									3	885.787	10.47	0.00927	49.025	7.779e-05	7.721e-08	4.54
909	High	[K].NETGDLGFSEKPNVAR.[S]	1xTMTpro [K11]; 1xTMTpro [N-Term]	0.000133789	1	3	1	A0A6P6TGT1	A0A6P6TGT1 [330-345]	A0A6P6T808; A0A6P6TGT1; A0A6P6T6K6	0	2342.26	16	80.2	86.8	82.9	70.2	81.5	76.8	83.2	85.8	88.1	88.5	86.8	66.9	131.3	198.9	202.6	179.2	102	248	218	239.8	256.9	157.8	268.1	162.9	3	781.426	1.83	0.00143	27.1234	7.779e-05	0.0001622	2.98
910	High	[K].NENKEVAVNDFLPASK.[A]	2xTMTpro [K4; K16]; 1xTMTpro [N-Term]	0.000133789	1	5	1	A0A6P6T429	A0A6P6T429 [209-224]	A0A6P6T429; A0A6P6T3X0; A0A6P6T2X8; A0A6P6T2V3; A0A6P6T394	1	2687.52	16	88.9	88.4	94.5	101.3	112.1	105.7	95.5	99.8	103.1	172.7	134.8	112.9	117.5	163.6	186.4	208.7	113.2	275.3	201.8	225.2	242.8	248.5	336.2	221.9	3	896.519	8.91	0.00798	40.2883	7.779e-05	8.626e-09	3.24
911	High	[R].NELGHAGLKDEGIVVKPSEGAEGR.[I]	2xTMTpro [K9; K16]; 1xTMTpro [N-Term]	0.000133789	1	3	1	A0A6P6WW85	A0A6P6WW85 [231-254]	A0A6P6WW85; A0A6P6WYI1; A0A6P6X4J7	1	3374.88	24	93.6	91.2	80.6	100.3	171.2	139.2	119	122.8	112.7	97.4	90.3	72.7	113.9	155.3	146.4	190.1	159.2	333.9	231.6	255.1	244.4	129	207.4	131.5	4	844.479	2.56	0.00216	27.5729	7.779e-05	5.865e-11	5.3
912	High	[R].NELEAFEK.[L]	1xTMTpro [K8]; 1xTMTpro [N-Term]	0.000133789	1	2	1	A0A6P6XNN6	A0A6P6XNN6 [476-483]	A0A6P6XNN6; A0A6P6XIV1	0	1587.89	8	76.5	92.5	87	82.9	89.9	91.4	92.4	96.1	97.1	102.5	99.1	98.2	224	378.8	380.1	378.3	201.1	527.4	432.6	480.2	506.6	326.5	547.6	427.2	2	794.452	5.76	0.00457	35.6889	7.779e-05	0.0003475	3.08
913	High	[K].NEGVGAFYK.[G]	1xTMTpro [K9]; 1xTMTpro [N-Term]	0.000133789	1	3	2	A0A6P6VKJ4	A0A6P6VKJ4 [62-70]	A0A6P6VKJ4; A0A6P6T4J6; A0A6P6VD06	0	1592.89	9	91.8	113.2	99.3	99.6	114.5	100.4	85.9	91.4	87.7	98.1	95.4	102.4	263.2	454.2	424.9	444.7	250.9	567.7	394.1	447.3	447.7	306.2	516.2	436.4	3	531.639	6.92	0.00368	30.2747	7.779e-05	0.0001805	2.52
914	High	[R].NEGIDLLKDK.[Q]	2xTMTpro [K8; K10]; 1xTMTpro [N-Term]	0.000133789	1	2	1	A0A6P6UKC7	A0A6P6UKC7 [302-311]	A0A6P6UKC7; A0A6P6URF6	1	2057.24	10	74.6	72.4	85.4	129.7	163.3	139.8	98.2	103.5	110.8	149	112.3	94.7	82	111.3	140.1	222.1	137.1	302.9	172.6	194.2	217	178.2	233	154.8	3	686.424	6.86	0.00471	38.1707	7.779e-05	0.0002037	1.99
915	High	[R].NEGGYGVIK.[K]	1xTMTpro [K9]; 1xTMTpro [N-Term]	0.000133789	1	1	2	A0A6P6T536	A0A6P6T536 [259-267]	A0A6P6T536	0	1544.89	9	60	75	71.1	81.4	75.9	97.1	98	103.4	106.6	207.8	171.1	218.9	70.9	124	125.4	150	68.5	226.2	185.3	208.7	224.4	267.4	381.7	384.8	2	772.956	7.07	0.00546	25.9293	7.779e-05	2.781e-05	3.3
916	High	[R].NEGEDVRPAANASATAR.[S]	1xTMTpro [N-Term]	0.000133789	1	1	1	A0A6P6W9D5	A0A6P6W9D5 [420-436]	A0A6P6W9D5	0	2033.03	17																									3	678.352	4	0.00271	11.3895	7.779e-05	2.653e-07	2.22
917	High	[K].NEFGSDIIKDLEHDDDNEFLPILK.[A]	2xTMTpro [K9; K24]; 1xTMTpro [N-Term]	0.000133789	1	1	1	A0A6P6UPT4	A0A6P6UPT4 [210-233]	A0A6P6UPT4	1	3728.98	24	92.5	111.9	121.4	91.3	110.5	98.3	74.6	63.9	89.1	97.5	69.7	78.7	134	226.8	262.5	205.9	122.2	280.5	172.7	158	229.9	153.6	190.3	169.5	4	933.008	6.9	0.00643	52.301	7.779e-05	1.576e-11	4.79
918	High	[K].NEFGSDIIK.[D]	1xTMTpro [K9]; 1xTMTpro [N-Term]	0.000133789	1	1	2	A0A6P6UPT4	A0A6P6UPT4 [210-218]	A0A6P6UPT4	0	1630.93	9	112	111.9	122.8	85.4	85.1	93.5	86.8	90.7	91.5	87.4	80.9	132.1	206.1	288.1	337.3	244.8	119.6	339	255.3	284.7	299.7	174.9	280.7	361.4	2	815.976	8.85	0.00721	36.3235	7.779e-05	5.349e-06	2.39
919	High	[R].NEEWALAK.[K]	1xTMTpro [K8]; 1xTMTpro [N-Term]	0.000133789	2	4	1	A0A6P6XC72; A0A6P6X790	A0A6P6XC72 [20-27]; A0A6P6X790 [20-27]	A0A6P6VF64; A0A6P6XC72; A0A6P6X790; A0A6P6XG02	0	1568.89	8																									2	784.956	8.13	0.00638	34.4048	7.779e-05	0.0001299	3.16
920	High	[R].NEEGGNSVSTVVLR.[G]	1xTMTpro [N-Term]	0.000133789	1	3	1	A0A6P6SZ39	A0A6P6SZ39 [368-381]	A0A6P6SZ39; A0A6P6VJY9; A0A6P6W093	0	1764.94	14	92.6	150	136.2	69.6	35.8	97.5	103.8	112.2	105.8	41.5	104.6	68.6	205.1	464.9	450.4	240.1	60.6	425.4	367.5	424	417.5	99.9	436.9	225.7	2	882.977	2.69	0.00237	23.5912	7.779e-05	2.74e-09	3.17
921	High	[R].NEAGPSTDSLGDALGIAQHHDAVTGTEQQHVANDYAK.[R]	1xTMTpro [K37]; 1xTMTpro [N-Term]	0.000133789	1	2	1	A0A6P6X5T5	A0A6P6X5T5 [389-425]	A0A6P6X5T5; A0A6P6X541	0	4426.18	37	103.9	84.7	90.7	74.3	238	83.2	64.4	71.9	79	215.9	67.9	74.8	90.6	103.3	118	100.9	158.5	142.9	89.8	107	122.7	204.8	111.7	96.9	5	886.05	9.63	0.00853	33.6457	7.779e-05	1.317e-09	7.58
922	High	[K].NDVMGQFHDALYLGDIQER.[V]	1xTMTpro [N-Term]	0.000133789	1	2	1	A0A6P6UPC4	A0A6P6UPC4 [729-747]	A0A6P6UPC4; A0A6P6URT7	0	2525.24	19	126.5	101.3	99.2	94.3	89.2	86.5	85.1	84.8	90.4	97.2	102.3	84.4	203.4	227.8	238	236.2	109.5	274	218.8	232.7	258.9	170	310.2	201.8	3	842.425	7.24	0.0061	44.7835	7.779e-05	0.0003128	2.57
923	High	[R].NLLTLDEKDPR.[R]	1xTMTpro [K8]; 1xTMTpro [N-Term]	0.000133789	1	1	3	A0A6P6V243	A0A6P6V243 [60-70]	A0A6P6V243	1	1922.12	11	95.1	111.6	111.6	114.6	134.6	124	105.7	108.9	108.3	102.9	109.7	95.5	219.6	360.4	384.6	412.1	237.3	564.2	390.1	428.8	445	258.4	477.5	327.8	2	961.57	6.69	0.00643	33.7535	7.779e-05	6.846e-06	3.07
924	High	[K].NINCDNLK.[-]	1xCarbamidomethyl [C4]; 1xTMTpro [K8]; 1xTMTpro [N-Term]	0.000133789	1	1	15	A0A6P6W2N2	A0A6P6W2N2 [91-98]	A0A6P6W2N2	0	1598.88	8	118.6	88.7	77.8	88.8	100.9	89.5	133.2	132.9	123.3	89.1	102.1	88.2	2264.3	2370.8	2218.3	2639.9	1471.6	3369.2	4065.7	4331.1	4192.6	1851.3	3679.1	2503.7	2	799.95	6.36	0.00509	20.2807	7.779e-05	3.879e-05	3.11
925	High	[K].NINDILGPQLVGVDVR.[N]	1xTMTpro [N-Term]	0.000133789	1	1	2	A0A6P6X608	A0A6P6X608 [128-143]	A0A6P6X608	0	2026.16	16	103.7	117.9	108.6	102.5	74.9	105.3	114.2	117.8	126.9	96.4	133.7	102.1	154	245	240.8	237.1	85	308.2	271.3	298.6	335.8	155.8	374.8	225.4	3	676.063	7.04	0.00476	48.5636	7.779e-05	7.675e-08	3.65
926	High	[R].NSEYYGDESLR.[N]	1xTMTpro [N-Term]	0.000133789	1	7	1	A0A6P6UCG0	A0A6P6UCG0 [491-501]	A0A6P6UCG0; A0A6P6U7R9; A0A6P6U623; A0A6P6U5N6; A0A6P6U6D0; A0A6P6UBJ8; A0A6P6UD33	0	1636.78	11	112.3	123.5	106.3	92.7	86.1	95.1	131.9	123.6	109.3	63.9	117.9	102.4	139.7	214.9	197.4	179.5	81.8	233.1	262.3	262.4	242.2	86.5	276.6	189.4	2	818.896	4.85	0.00397	18.6728	7.779e-05	0.0001372	2.15
927	High	[R].NSDFSLDVER.[I]	1xTMTpro [N-Term]	0.000133789	1	1	1	A0A6P6VSK7	A0A6P6VSK7 [212-221]	A0A6P6VSK7	0	1485.75	10	89.3	106.5	96	82.2	70.4	90.4	87.2	97.7	97.4	77.9	90.2	74.3	149.1	248.6	239.1	213.8	89.8	297.2	232.7	278.1	289.4	141.4	284.1	184.3	2	743.385	8.44	0.00627	29.8448	7.779e-05	0.000425	1.91
928	High	[R].NQYDTDVTTWSPAGR.[L]	1xTMTpro [N-Term]	0.000133789	1	2	2	A0A6P6UN63	A0A6P6UN63 [4-18]	A0A6P6UN63; A0A6P6UUQ5	0	2014.98	15	91.7	121.9	108.5	79.8	53.3	92.7	95.6	96.3	104	62.3	123.7	88.1	196.3	365.1	346.7	266.2	87.1	391.1	327.1	351.8	396.4	145	499.5	280.4	2	1008	5.5	0.00554	30.8898	7.779e-05	4.137e-10	4.25
929	High	[K].NQVEAVIEK.[I]	1xTMTpro [K9]; 1xTMTpro [N-Term]	0.000133789	1	3	2	A0A6P6VE11	A0A6P6VE11 [169-177]	A0A6P6STK2; A0A6P6VE11; A0A6P6STQ9	0	1637.97	9	101.9	113.3	109.8	80	120.3	85.3	91	95.1	99.5	100.6	85.3	72.2	199.2	310	320.6	243.6	179.6	328.7	284.4	317.4	346.4	214	314.6	210	2	819.495	6.67	0.00546	30.7697	7.779e-05	1.795e-05	3.75
930	High	[K].NQVAMNPTNTVFDAKR.[L]	1xOxidation [M5]; 1xTMTpro [K15]; 1xTMTpro [N-Term]	0.000133789	2	2	1	A0A6P6UA78; A0A6P6U8W3	A0A6P6UA78 [60-75]; A0A6P6U8W3 [60-75]	A0A6P6UA78; A0A6P6U8W3	1	2430.31	16	88	103.2	83.6	80.5	87.2	88.2	102.7	109	106.9	96.2	108.2	58.8	132.7	217.7	188.1	188.9	100.4	262	247.6	280.3	286.8	157.8	307.7	131.8	3	810.778	5.53	0.00448	25.2628	7.779e-05	3.009e-08	5
931	High	[K].NQVAMNPTNTVFDAK.[R]	1xTMTpro [K15]; 1xTMTpro [N-Term]	0.000133789	2	2	2	A0A6P6UA78; A0A6P6U8W3	A0A6P6UA78 [60-74]; A0A6P6U8W3 [60-74]	A0A6P6UA78; A0A6P6U8W3	0	2258.21	15	72.3	92.4	90.2	104.3	125.7	112.7	97.8	99.4	113.9	139.1	122.2	115.2	235.6	421.7	438.7	529.4	313.1	723.8	509.9	553.2	661.2	493.4	751.5	558.4	2	1129.62	8.45	0.00955	38.6666	7.779e-05	8.894e-12	5.81
932	High	[K].NQVAMNPQNTVFDAK.[R]	1xOxidation [M5]; 1xTMTpro [K15]; 1xTMTpro [N-Term]	0.000133789	1	2	2	A0A6P6X2U6	A0A6P6X2U6 [60-74]	A0A6P6X2U6; A0A6P6X4Y9	0	2301.22	15	87.6	96.5	90.8	76.4	98.2	84	76.1	78.4	77.5	90	85.5	77.6	262.8	405	406.2	356.8	224.9	496.3	364.8	401.3	413.9	293.7	483.9	345.7	3	767.748	6.06	0.00465	30.1581	7.779e-05	1.39e-05	3.72
933	High	[K].NQVAMNPLNTVFDAK.[R]	1xOxidation [M5]; 1xTMTpro [K15]; 1xTMTpro [N-Term]	0.000133789	1	1	1	A0A6P6VP42	A0A6P6VP42 [60-74]	A0A6P6VP42	0	2286.24	15	93.5	97.7	96.2	68.5	98.4	95.8	83.2	89.2	86.8	106.3	98.7	83.1	58.8	86	90.3	67.1	47.3	118.8	83.7	95.7	97.3	72.8	117.1	77.7	3	762.758	7.6	0.00579	45.1182	7.779e-05	3.835e-07	4.35
934	High	[K].NQVAMNPLNTVFDAK.[R]	1xTMTpro [K15]; 1xTMTpro [N-Term]	0.000133789	1	1	1	A0A6P6VP42	A0A6P6VP42 [60-74]	A0A6P6VP42	0	2270.25	15	85	91.4	90.9	109.2	156.6	118.2	91.5	89.8	95.8	169.4	120.4	125.8	48.2	72.5	76.9	96.4	67.8	132	82.9	86.9	96.7	104.5	128.8	106	3	757.426	7.38	0.00558	47.6133	7.779e-05	1.196e-06	4.17
935	High	[K].NQVAMNPHNTVFDAK.[R]	1xOxidation [M5]; 1xTMTpro [K15]; 1xTMTpro [N-Term]	0.000133789	2	2	1	A0A6P6T4P4; A0A6P6SRY0	A0A6P6T4P4 [59-73]; A0A6P6SRY0 [59-73]	A0A6P6T4P4; A0A6P6SRY0	0	2310.22	15	104.5	89.9	83.4	83.4	260.9	71.6	85.2	86.4	75.4	178.7	72.7	91.2	153.6	184.9	183.1	191	293	207.4	200.3	216.7	197.5	285.9	201.6	199.4	3	770.75	8.27	0.00636	21.758	7.779e-05	2.632e-08	5.04
936	High	[R].NQSHLPPTVVDLGYNGTDTDATDIER.[I]	1xTMTpro [N-Term]	0.000133789	2	3	8	A0A6P6SDS1; A0A6P6SDS2	A0A6P6SDS1 [255-280]; A0A6P6SDS2 [255-280]	A0A6P6SDS1; A0A6P6SDS2; A0A6P6SDQ3	0	3132.54	26	103.2	132.2	127	78.1	62.2	97.4	108.6	103.6	110.7	64.8	105.1	76	451.4	808.9	828.9	531.9	207.8	839.6	759.1	772.7	862.2	308.3	866.7	494.1	3	1044.86	11.12	0.01161	39.2907	7.779e-05	9.838e-16	5.3
937	High	[K].NQQQNANSALR.[Q]	1xTMTpro [N-Term]	0.000133789	1	2	1	A0A6P6UDI9	A0A6P6UDI9 [309-319]	A0A6P6UDI9; A0A6P6UA98	0	1547.82	11	85.3	123.3	97.6	76.1	36.1	85.4	116.9	108.7	98.6	39.2	121.9	82.8	149.5	302.2	255.2	207.7	48.3	294.7	327.6	324.8	307.5	74.7	402.9	215.7	2	774.419	6.02	0.00466	10.3895	7.779e-05	1.437e-06	4
938	High	[R].NQNGQLGLGTTEDSLVPQK.[I]	1xTMTpro [K19]; 1xTMTpro [N-Term]	0.000133789	2	4	1	A0A6P6TA94; A0A6P6THE0	A0A6P6TA94 [173-191]; A0A6P6THE0 [168-186]	A0A6P6TA94; A0A6P6THE0; A0A6P6TAB8; A0A6P6TG35	0	2607.42	19	112.2	106.3	118.7	103.2	122.9	111.2	113.4	101.1	107.9	118.9	111.1	89.2	121.2	160.6	191.3	173.5	101.4	236.7	195.8	186.2	207.5	139.7	226.3	143.2	3	869.82	8.48	0.00737	39.2263	7.779e-05	2.278e-08	3.51
939	High	[R].NQLWSQSGSPLIPLVEFREPEVMK.[Q]	1xTMTpro [K24]; 1xTMTpro [N-Term]	0.000133789	1	2	1	A0A6P6SG78	A0A6P6SG78 [50-73]	A0A6P6SG78; A0A6P6STG0	1	3392.85	24	69.6	80.1	80.2	98	128	89	96.5	98.7	107.9	189.2	121.3	132	55.3	89.1	95.1	121.3	77.7	139.4	122.6	133.9	152.7	163.6	181.9	156	4	848.971	3.08	0.00262	50.9394	7.779e-05	2.893e-09	4.64
940	High	[K].NQITITNDK.[G]	1xTMTpro [K9]; 1xTMTpro [N-Term]	0.000133789	3	4	2	A0A6P6W7K1; A0A6P6T4P4; A0A6P6SRY0	A0A6P6W7K1 [508-516]; A0A6P6T4P4 [504-512]; A0A6P6SRY0 [504-512]	A0A6P6W7K1; A0A6P6T4P4; A0A6P6VP37; A0A6P6SRY0	0	1654.96	9	91	116.2	101.2	90.6	93.3	88.8	94.9	89.9	87.1	101.7	106.2	114.3	173.7	310.1	288.2	269.2	136	333.9	289.5	292.7	296	211.2	382.2	324.1	2	827.99	6.13	0.00507	24.3944	7.779e-05	3.912e-06	1.12
941	High	[R].NQIILEGEEYK.[Q]	1xTMTpro [K11]; 1xTMTpro [N-Term]	0.000133789	2	2	1	A0A6P6VRJ6; A0A6P6WAZ4	A0A6P6VRJ6 [153-163]; A0A6P6WAZ4 [153-163]	A0A6P6VRJ6; A0A6P6WAZ4	0	1944.09	11	61.4	64.8	64.1	95.6	146.6	117.9	85	94.9	91.6	168.2	110.6	173.3	22.2	32.8	34.6	53.9	40.5	84.1	49.2	58.6	59	66.2	75.5	93.2	3	648.708	8.38	0.00543	37.6732	7.779e-05	3.764e-06	3.51
942	High	[R].NQLGHAGVKDEGLVVR.[A]	1xTMTpro [K9]; 1xTMTpro [N-Term]	0.000133789	1	1	1	A0A6P6WKI5	A0A6P6WKI5 [231-246]	A0A6P6WKI5	1	2300.33	16	100.5	93.7	76.5	133.8	166.3	141.7	128	121.7	126.4	93	97.5	97.6	58.9	76.8	66.9	122.1	74.4	163.6	119.9	121.7	131.9	59.3	107.8	85	4	575.84	3.02	0.00174	22.6012	7.779e-05	1.167e-07	3.9
943	High	[R].NQIEELAAK.[G]	1xTMTpro [K9]; 1xTMTpro [N-Term]	0.000133789	1	2	1	A0A6P6URR9	A0A6P6URR9 [137-145]	A0A6P6URR9; A0A6P6UKT0	0	1623.96	9	93.5	91.4	83.3	108.2	133.2	122.7	98.2	90.6	105.1	109.7	96.4	125	39.8	54.4	52.9	71.7	43.3	102.9	66.8	65.8	79.7	50.8	77.4	79.1	3	541.993	5.53	0.00299	33.091	7.779e-05	0.0001922	2.77
944	High	[R].NQLAEVDELEDK.[L]	1xTMTpro [K12]; 1xTMTpro [N-Term]	0.000133789	2	2	1	A0A6P6T4P4; A0A6P6SRY0	A0A6P6T4P4 [589-600]; A0A6P6SRY0 [589-600]	A0A6P6T4P4; A0A6P6SRY0	0	2011.08	12	109.4	105.4	109.4	106.8	113.1	90.1	101.2	99.9	103.1	96.9	89.1	111.3	133.7	180.2	199.5	203.2	105.6	217.1	197.8	208.4	224.4	128.9	205.3	202.2	3	671.039	8.85	0.00593	38.2886	7.779e-05	1.112e-05	4.35
945	High	[K].NQGGYDLLGR.[T]	1xTMTpro [N-Term]	0.000133789	1	1	1	A0A6P6UKW6	A0A6P6UKW6 [151-160]	A0A6P6UKW6	0	1396.75	10	98.7	130.8	113.3	102.1	88.1	105.6	117.2	114.1	114.5	98.6	146.2	126.1	67.3	124.8	115.3	108.5	45.9	142	127.8	132.8	139.1	73.2	188.1	127.9	2	698.884	7.18	0.00502	26.4141	7.779e-05	0.000201	1.77
946	High	[K].NQFVETNVGFDTICK.[V]	1xCarbamidomethyl [C14]; 1xTMTpro [K15]; 1xTMTpro [N-Term]	0.000133789	1	1	1	A0A6P6UKW6	A0A6P6UKW6 [227-241]	A0A6P6UKW6	0	2380.25	15	77.5	79.9	89.6	90.8	141.6	104.9	96.5	88.1	94.9	158.8	122.7	120.5	70.4	101.6	121.5	128.5	98.3	187.9	140.2	136.6	153.5	157	210.4	162.7	3	794.091	4.9	0.00389	43.6808	7.779e-05	2.176e-09	4.69
947	High	[K].NQEVAEAIQK.[V]	1xTMTpro [K10]; 1xTMTpro [N-Term]	0.000133789	1	2	1	A0A6P6UHG7	A0A6P6UHG7 [161-170]	A0A6P6UHG7; A0A6P6W8K6	0	1738	10	91.6	95.8	110.1	101.7	141.4	106.5	78.9	85.2	95.3	134.9	85.3	91.8	26.7	39.1	47.9	46.2	31.5	61.2	36.8	42.4	49.5	42.8	46.9	39.8	3	580.008	5.86	0.00339	24.0002	7.779e-05	7.499e-06	3.43
948	High	[R].NQDGNAVEADSMWFYNR.[H]	1xOxidation [M12]; 1xTMTpro [N-Term]	0.000133789	1	1	1	A0A6P6WC40	A0A6P6WC40 [442-458]	A0A6P6WC40	0	2337.05	17	96.4	109.9	114.1	91	80.6	100.7	91.4	92.2	112	110.5	103.2	83.3	73.1	116.6	129.2	107.5	46.7	150.6	110.9	119.4	151.3	91.2	147.7	93.9	3	779.693	4.78	0.00372	36.467	7.779e-05	1.052e-07	4.05
949	High	[R].NQADVDAIMLEIDGTTNK.[S]	1xTMTpro [K18]; 1xTMTpro [N-Term]	0.000133789	1	1	1	A0A6P6X608	A0A6P6X608 [144-161]	A0A6P6X608	0	2556.35	18	91.5	74.5	92.2	104	198.7	127.9	82.8	83.7	101.5	162.4	95.6	85.5	66.1	75.3	99.4	117	109.6	182.1	95.6	103.1	130.6	127.6	130.3	91.8	3	852.793	7.18	0.00612	48.0292	7.779e-05	1.081e-10	5.67
950	High	[K].NQADTTIYSIEK.[S]	1xTMTpro [K12]; 1xTMTpro [N-Term]	0.000133789	1	2	2	A0A6P6VSY4	A0A6P6VSY4 [586-597]	A0A6P6VSY4; A0A6P6WBC6	0	1991.09	12	92.5	106.3	94.4	99.5	123.8	114.5	99	101.8	103.4	96.8	99.5	87.3	303.1	487.5	461.5	508	309.9	739.4	518.7	569.4	603.3	345	615	425.4	2	996.058	7.52	0.00748	33.0894	7.779e-05	4.496e-09	4.63
951	High	[K].NQADSIVYQTEK.[Q]	1xTMTpro [K12]; 1xTMTpro [N-Term]	0.000133789	1	1	2	A0A6P6WDV2	A0A6P6WDV2 [601-612]	A0A6P6WDV2	0	2004.09	12	93.3	116.7	103.2	85.6	77.4	91.1	117.9	116.6	102.1	83.5	99.2	91.7	172.7	302.3	285.2	246.9	109.5	332.4	349.1	368.3	336.5	168.3	346.4	252.3	2	1002.55	6.67	0.00668	25.8462	7.779e-05	5.089e-05	2.5
952	High	[K].NQADSIIYQTEK.[Q]	1xTMTpro [K12]; 1xTMTpro [N-Term]	0.000133789	1	2	1	A0A6P6UKC7	A0A6P6UKC7 [592-603]	A0A6P6UKC7; A0A6P6URF6	0	2018.1	12																									3	673.376	4.25	0.00286	30.1268	7.779e-05	8.277e-05	3.63
953	High	[K].NQAAVNPER.[T]	1xTMTpro [N-Term]	0.000133789	2	2	2	A0A6P6TVI9; A0A6P6W685	A0A6P6TVI9 [89-97]; A0A6P6W685 [133-141]	A0A6P6TVI9; A0A6P6W685	0	1302.71	9	95.1	136.2	113.3	92.4	34.6	100.5	130.2	122.2	112.2	46.4	124.7	99.6	258.6	518.2	459.7	391.2	71.8	538.5	566.2	566.9	543.5	137.4	639.8	402.6	2	651.86	3.48	0.00227	10.7926	7.779e-05	0.000273	2.71
954	High	[R].NPTPPSGIEILYDYGREDND.[-]	1xTMTpro [N-Term]	0.000133789	1	1	1	A0A6P6WBZ8	A0A6P6WBZ8 [97-116]	A0A6P6WBZ8	1	2569.24	20	93.2	115.1	116.7	96.4	85.5	113.5	110.6	112.5	107.1	92.8	110.2	74.5	64.7	111.8	120.9	104.2	45.3	155.2	122.7	133.2	132.4	70.1	144.3	76.9	3	857.093	10.34	0.00886	46.4286	7.779e-05	5.373e-05	4.17
955	High	[K].NSGAPCNGDVITDVTR.[Y]	1xCarbamidomethyl [C6]; 1xTMTpro [N-Term]	0.000133789	1	2	2	A0A6P6UPJ9	A0A6P6UPJ9 [342-357]	A0A6P6UPJ9; A0A6P6UUA4	0	1979.98	16	99.8	109.1	102.3	75.9	89.8	79.4	90.8	91.1	97.1	73.5	82.2	66.5	295.7	451.9	452.1	350.1	203.2	463.6	429.9	460.1	511.9	237	459.5	292.7	2	990.499	7.1	0.00703	24.5821	7.779e-05	1.806e-07	2.92
956	High	[R].NPSLDYGFK.[G]	1xTMTpro [K9]; 1xTMTpro [N-Term]	0.000133789	3	6	1	G1CRI2; A0A6P6VPJ8; A0A6P6VDX4	G1CRI2 [443-451]; A0A6P6VPJ8 [449-457]; A0A6P6VDX4 [446-454]	G1CRI2; A0A6P6VPJ8; A0A6P6VDX4; A0A6P6VWV5; A0A6P6T3Z0; A0A6P6U6T2	0	1648.92	9	48.7	76.1	61.1	97.6	89.6	98.7	150	153.5	136.1	123.6	128.4	121	92.2	201.7	172.9	288	129.7	368.7	454.5	496.3	459.2	254.8	459.2	340.9	2	824.967	4.13	0.0034	35.363	7.779e-05	3.461e-05	3.17
957	High	[K].NSLENYAYNMK.[N]	1xTMTpro [K11]; 1xTMTpro [N-Term]	0.000133789	1	2	2	A0A6P6X2U6	A0A6P6X2U6 [546-556]	A0A6P6X2U6; A0A6P6X4Y9	0	1955.02	11	72.9	84.3	72.5	90.8	143.4	103.3	76.2	74.2	78.5	140.7	99.2	95.2	147.9	239.3	219.6	286.9	222.3	413.1	247.2	257	283.8	310.7	379.8	287.2	3	652.351	9.31	0.00607	36.6567	7.779e-05	2.743e-05	3.29
958	High	[R].NSLPATGPEAQR.[H]	1xTMTpro [N-Term]	0.000133789	1	1	1	A0A6P6XK95	A0A6P6XK95 [30-41]	A0A6P6XK95	0	1544.84	12	84.6	109.5	92.6	83.9	50.4	84.1	107.8	118.3	104	46.5	93.1	72	99.3	179.7	162.1	153.3	45.2	194.5	202.2	236.8	217.3	59.3	206.1	125.5	2	772.925	4.71	0.00364	14.8451	7.779e-05	0.000288	2.31
959	High	[K].NVLAIAVETDYSFPQADK.[V]	1xTMTpro [K18]; 1xTMTpro [N-Term]	0.000133789	2	2	1	A0A6P6W8B9; A0A6P6VR31	A0A6P6W8B9 [250-267]; A0A6P6VR31 [250-267]	A0A6P6W8B9; A0A6P6VR31	0	2589.41	18	96.5	85.4	91.2	83.4	126.3	79.1	85.1	81.4	78.1	99.2	68.1	79.5	100.1	124	141.2	134.8	100.1	161.8	141.2	144.1	144.3	112	133.3	122.6	3	863.815	9.32	0.00804	52.4259	7.779e-05	2.012e-06	4.12
960	High	[K].NVGTANPLVLIDEIDK.[L]	1xTMTpro [K16]; 1xTMTpro [N-Term]	0.000133789	1	2	1	A0A6P6VZB1	A0A6P6VZB1 [528-543]	A0A6P6VZB1; A0A6P6WH30	0	2319.34	16	76.2	87.9	87.8	83	110.7	95.6	90.1	83	95.3	102.2	86.4	94.4	64	103.3	110	108.5	71	158.2	120.9	118.9	142.5	93.4	136.8	117.8	3	773.793	10.16	0.00785	51.9615	7.779e-05	3.353e-08	3.95
961	High	[K].NVGSNAEAVYEVK.[V]	1xTMTpro [K13]; 1xTMTpro [N-Term]	0.000133789	1	2	2	A0A6P6XAA1	A0A6P6XAA1 [690-702]	A0A6P6XAA1; A0A6P6XGQ7	0	1988.09	13	114.1	126.2	128.5	87.7	93.8	97.6	96.2	106.3	110.4	79	79.7	70.2	301.8	467.1	507.5	361.5	189.6	508.9	407.1	479.9	520.2	227.3	397.8	276.2	2	994.556	4.97	0.00494	28.906	7.779e-05	1.522e-09	5.25
962	High	[R].NVGDLSGGELQR.[F]	1xTMTpro [N-Term]	0.000133789	1	1	1	A0A6P6TSN7	A0A6P6TSN7 [18-29]	A0A6P6TSN7	0	1548.83	12	96.9	114.4	105.3	90.9	62.7	99.2	106.9	110.6	104.1	63	125.1	96.2	133.8	221	217.1	195.5	66.1	269.9	236.1	260.5	256	94.7	325.9	197.4	2	774.925	7.82	0.00606	23.568	7.779e-05	1.964e-08	3.96
963	High	[R].NVDPNYAPGYK.[V]	1xTMTpro [K11]; 1xTMTpro [N-Term]	0.000133789	1	3	1	A0A6P6UB69	A0A6P6UB69 [150-160]	A0A6P6UB69; A0A6P6U4Z7; A0A6P6UEY3	0	1846	11	97.6	103.1	101.4	96.8	86.9	103.9	99.5	114.1	102.5	92.8	99.3	95.8	103.9	153.5	161.1	160.4	70.6	217.8	169.2	207.1	194.3	107.4	199.3	151.5	3	616.009	7.2	0.00443	25.659	7.779e-05	0.000111	2.45
964	High	[R].NVDEQCRCEAVK.[Q]	2xCarbamidomethyl [C6; C8]; 1xTMTpro [K12]; 1xTMTpro [N-Term]	0.000133789	1	1	5	A0A6P6XN60	A0A6P6XN60 [103-114]	A0A6P6XN60	1	2116.08	12	113.1	99.7	87.8	88.4	77	82.1	140.1	160.9	123.5	68.4	98.5	62.9	704.2	868	815.9	857.3	366.3	1007.3	1394.2	1709.4	1368.9	463.6	1156.6	582	2	1058.55	3.75	0.00397	13.4785	7.779e-05	1.256e-06	3.5
965	High	[R].NVDEQCRCEAVK.[Q]	2xCarbamidomethyl [C6; C8]; 1xTMTpro [N-Term]; 1xTMTpro [K12]	0.000133789	1	1	8	A0A6P6XN60	A0A6P6XN60 [103-114]	A0A6P6XN60	1	1811.87	12	126.4	90.2	89.8	78.7	128	76.6	123.9	145.4	133.1	117.3	84	53.1	533.3	532.7	565.2	517.2	412.5	637.2	836	1047	999.8	538.3	668.3	333.1	3	604.63	3.05	0.00184	10.5083	7.779e-05	1.005e-08	4.84
966	High	[K].NVATNPNEEKFR.[K]	1xTMTpro [K10]; 1xTMTpro [N-Term]	0.000133789	1	2	1	A0A6P6WUA3	A0A6P6WUA3 [337-348]	A0A6P6WUA3; A0A6P6WQ43	1	2027.12	12	92.6	105.3	84.7	86.8	87	96.3	102.6	99.4	99	68.7	89.1	66.3	166.6	264.9	227.3	243.1	119.5	341.2	295	305	317	134.4	302.4	177.3	3	676.383	9.36	0.00633	18.2048	7.779e-05	2.083e-05	3.09
967	High	[R].NVAQADASIK.[A]	1xTMTpro [K10]; 1xTMTpro [N-Term]	0.000133789	1	2	2	A0A6P6WC05	A0A6P6WC05 [174-183]	A0A6P6WC05; A0A6P6VTU0	0	1624.95	10	73.4	90.2	84	100.6	103.1	107.5	100.4	106.5	105.5	117.2	119.7	115	175.4	301.3	299.6	374.1	188.1	506.1	383.2	433.9	448.7	304.6	539.3	408.1	2	812.985	6.96	0.00565	22.8317	7.779e-05	7.172e-07	4.42
968	High	[K].NVALLVVSEGWAK.[V]	1xTMTpro [K13]; 1xTMTpro [N-Term]	0.000133789	2	2	1	A0A6P6XGC1; A0A6P6X732	A0A6P6XGC1 [101-113]; A0A6P6X732 [101-113]	A0A6P6XGC1; A0A6P6X732	0	1994.19	13	84	96	83.1	101.5	178	93.5	100.7	90.9	96.1	174	124.9	146.9	53.4	85.4	78.9	100.6	86.5	117.2	102.4	98.7	108.9	120.4	149.9	138.9	3	665.407	6.98	0.00464	50.8463	7.779e-05	2.5e-06	3.84
969	High	[K].NVAGDIIGTR.[T]	1xTMTpro [N-Term]	0.000133789	1	2	1	A0A6P6SKT1	A0A6P6SKT1 [101-110]	A0A6P6SKT1; A0A6P6SX89	0	1319.76	10	145.8	205.8	200.5	78.6	43.5	90.6	84.1	80.4	79.6	45.8	84.4	76.1	98.7	194.9	202.6	82.9	22.5	120.9	91	92.9	96	33.7	107.8	76.6	2	660.389	7.27	0.0048	27.8295	7.779e-05	0.0001609	2.65
970	High	[R].NTVLVDALSR.[R]	1xTMTpro [N-Term]	0.000133789	1	1	1	A0A6P6X5G0	A0A6P6X5G0 [752-761]	A0A6P6X5G0	0	1391.82	10	101.3	124.8	115.6	79.9	48	96.2	104.5	107.7	98.9	59	124.8	100.1	103.3	178	175.9	126.8	37.4	193.2	170.4	187.3	179.6	65.4	240.1	151.7	2	696.42	10.3	0.00717	38.1674	7.779e-05	5.231e-05	2.44
971	High	[K].NTVESVTGIISK.[T]	1xTMTpro [K12]; 1xTMTpro [N-Term]	0.000133789	2	2	1	A0A6P6S820; A0A6P6SGT0	A0A6P6S820 [350-361]; A0A6P6SGT0 [347-358]	A0A6P6S820; A0A6P6SGT0	0	1856.1	12	127.9	97.3	108.3	104	153.6	100.9	96.6	86.4	87.8	123.1	90.3	105	48.5	51.6	61.3	61.4	44.5	75.4	58.6	55.9	59.3	50.8	64.6	59.2	3	619.374	4.69	0.0029	41.6699	7.779e-05	8.27e-06	3.79
972	High	[R].NTTAYENYER.[I]	1xTMTpro [N-Term]	0.000133789	1	1	3	A0A6P6SV03	A0A6P6SV03 [379-388]	A0A6P6SV03	0	1564.76	10	97	132.2	109.6	102.2	43.6	114.3	129.6	118	115.5	45.1	136	92.8	368.3	702.4	621.1	604.2	126.3	855.5	787	764.3	781.1	186.3	974.2	523.8	2	782.888	8.59	0.00672	14.4107	7.779e-05	4.164e-05	3.38
973	High	[R].NTIENLAVLR.[F]	1xTMTpro [N-Term]	0.000133789	1	4	1	A0A6P6VY09	A0A6P6VY09 [277-286]	A0A6P6VY09; A0A6P6WHA9; A0A6P6WHK3; A0A6P6W1B5	0	1446.86	10	81.2	98.5	90.3	77.5	88.4	90.7	91.5	88.2	86.7	83.8	90.7	78.9	159	269.8	264	236.4	132.2	350.1	286.3	294.6	302.2	178.6	335	229.5	2	723.939	7.99	0.00578	39.4729	7.779e-05	2.215e-05	2.55
974	High	[R].NTGIWDEVSISVTGPVK.[I]	1xTMTpro [K17]; 1xTMTpro [N-Term]	0.000133789	1	4	1	A0A6P6WHD0	A0A6P6WHD0 [194-210]	A0A6P6WHD0; A0A6P6W0H6; A0A6P6VZ59; A0A6P6WJ94	0	2410.35	17	97.9	100.3	109.5	91.5	139.1	93.5	98.2	97.2	97.7	149	104.6	104.2	44.3	63.5	74	64.5	48.1	83.4	71.1	75.1	78.8	73.4	89.3	70.1	3	804.128	9.23	0.00742	47.9177	7.779e-05	2.038e-09	4.34
975	High	[R].NTCPNVEALVR.[N]	1xCarbamidomethyl [C3]; 1xTMTpro [N-Term]	0.000133789	1	1	2	A0A6P6SX33	A0A6P6SX33 [32-42]	A0A6P6SX33	0	1576.84	11	109.9	148.7	130.8	95.2	61.7	115.3	112.8	118.4	115.5	59.5	117.8	86.1	115.9	219.4	205.9	156.4	49.7	239.5	190.1	213	216.8	68.3	234.4	134.9	2	788.93	5.75	0.00453	28.7059	7.779e-05	5.564e-05	2.5
976	High	[K].NTAVNDDSADR.[L]	1xTMTpro [N-Term]	0.000133789	1	1	2	A0A6P6T8W3	A0A6P6T8W3 [341-351]	A0A6P6T8W3	0	1481.72	11	103.3	124.8	116.4	119	29.3	80.3	151.7	129.1	89.3	32.9	112.1	114.6	349.6	590.6	587.7	627.3	75.6	535.1	820.8	745.4	538.3	121.1	715.4	576.4	2	741.366	6.18	0.00458	10.0234	7.779e-05	4.139e-07	3.74
977	High	[K].NTAGSLPLSPAVIK.[S]	1xTMTpro [K14]; 1xTMTpro [N-Term]	0.000133789	1	2	2	A0A6P6VWW4	A0A6P6VWW4 [410-423]	A0A6P6WCX1; A0A6P6VWW4	0	1976.2	14	99.4	108.5	107.9	84.9	102.4	92.6	97.3	99.5	99.9	81.3	88	71.5	366.1	558.8	592.9	486.8	288.1	671.7	573.1	625	655.3	325.7	611	391.5	2	988.61	5.04	0.00498	43.9704	7.779e-05	3.149e-10	4.79
978	High	[K].NTAGSLPLSPAVIK.[S]	1xTMTpro [K14]	0.000133789	1	2	1	A0A6P6VWW4	A0A6P6VWW4 [410-423]	A0A6P6WCX1; A0A6P6VWW4	0	1672	14	91.9	87.9	94.1	85.3	102.9	94.9	80	87.5	97.1	104.1	85.6	77.5	145.4	194.6	222.2	210	124.3	295.7	202.2	236.2	273.6	179.1	255.3	182.3	2	836.508	6.76	0.00565	41.3152	7.779e-05	0.0001248	2.79
979	High	[K].NSWGTGWGEQGYIR.[M]	1xTMTpro [N-Term]	0.000133789	2	2	9	A0A6P6VAA7; A0A6P6UXR6	A0A6P6VAA7 [307-320]; A0A6P6UXR6 [307-320]	A0A6P6VAA7; A0A6P6UXR6	0	1914.94	14	88.3	133.9	113.1	85.2	55.1	101	118.4	113.9	120.1	61	117.5	78.3	588.4	1247.7	1124.4	884.2	280.4	1326.5	1261	1294.9	1424.5	442.2	1477.2	775.8	2	957.982	7.48	0.00716	38.4715	7.779e-05	3.567e-11	3.51
980	High	[K].NSWGTGWGEQGYIR.[M]		0.000133789	2	2	1	A0A6P6VAA7; A0A6P6UXR6	A0A6P6VAA7 [307-320]; A0A6P6UXR6 [307-320]	A0A6P6VAA7; A0A6P6UXR6	0	1610.73	14																									2	805.876	6.77	0.00545	31.9275	7.779e-05	5.132e-05	3.23
981	High	[K].NSWGENWGENGYYK.[F]	1xTMTpro [K14]; 1xTMTpro [N-Term]	0.000133789	1	1	1	A0A6P6UKU7	A0A6P6UKU7 [340-353]	A0A6P6UKU7	0	2312.12	14	96.7	109.9	96.5	94.3	112.4	104	128.7	114.8	144.7	107.7	115.1	93.2	79.4	126.2	118.3	120.6	70.5	168.2	169	160.8	211.5	96.2	178.2	113.7	3	771.383	5.36	0.00413	39.1958	7.779e-05	1.319e-05	3.59
982	High	[K].NSWGAEWGVDGYFK.[M]	1xTMTpro [K14]; 1xTMTpro [N-Term]	0.000133789	1	1	1	A0A6P6SI29	A0A6P6SI29 [331-344]	A0A6P6SI29	0	2224.13	14	90.6	120.5	84.2	87.2	88.8	89.6	123	127.1	98.3	118	133.1	122	39.8	74.1	55.2	59.7	29.8	77.6	86.4	95.3	76.9	56.4	110.3	79.7	3	742.055	8.92	0.00661	47.107	7.779e-05	9.937e-06	2.1
983	High	[R].NSWGAEWGEDGYIR.[M]	1xTMTpro [N-Term]	0.000133789	2	2	2	A0A6P6UNQ4; A0A6P6UXX0	A0A6P6UNQ4 [315-328]; A0A6P6UXX0 [315-328]	A0A6P6UNQ4; A0A6P6UXX0	0	1943.92	14	76.2	131.7	109.7	84.6	43.8	103.8	123.1	122.4	130	58.6	132.1	91.8	86.7	209.7	186.4	150	38.1	232.7	224	237.7	263.4	72.5	283.5	155.2	2	972.468	4.02	0.0039	41.121	7.779e-05	2.134e-11	3.98
984	High	[R].NSWGAEWGEDGYIR.[M]		0.000133789	2	2	1	A0A6P6UNQ4; A0A6P6UXX0	A0A6P6UNQ4 [315-328]; A0A6P6UXX0 [315-328]	A0A6P6UNQ4; A0A6P6UXX0	0	1639.71	14																									2	820.368	9	0.00738	34.8109	7.779e-05	0.0002064	3.41
985	High	[K].NSSTGEVLVK.[H]	1xTMTpro [K10]; 1xTMTpro [N-Term]	0.000133789	1	1	1	A0A6P6VC59	A0A6P6VC59 [336-345]	A0A6P6VC59	0	1641.97	10	85.1	114.9	88.6	83.2	84.6	89.5	107.2	113.8	104.9	103.1	116.8	105.4	120.4	227.5	187.2	183.4	91.4	249.7	242.6	274.7	264.3	158.7	311.8	221.7	2	821.492	6.55	0.00538	25.4557	7.779e-05	2.052e-05	2.23
986	High	[R].NSQQFQALR.[A]	1xTMTpro [N-Term]	0.000133789	2	7	1	A0A6P6V586; A0A6P6TM66	A0A6P6V586 [270-278]; A0A6P6TM66 [268-276]	A0A6P6V586; A0A6P6TKT9; A0A6P6TM66; A0A6P6TCS8; A0A6P6VAN9; A0A6P6TCA3; A0A6P6TNF4	0	1395.77	9	113.1	156.2	125	113.8	39.8	114.5	135.6	130.9	138	56.6	155.7	97.2	52.5	101.5	86.6	82.3	14.1	104.8	100.7	103.7	114.1	28.6	136.4	67.1	2	698.393	8.94	0.00624	18.7984	7.779e-05	0.0001131	3.09
987	High	[K].NSPGYQAPSNIDQPR.[G]	1xTMTpro [N-Term]	0.000133789	1	2	1	A0A6P6WVU9	A0A6P6WVU9 [120-134]	A0A6P6WVU9; A0A6P6WMU9	0	1947.98	15	139.6	110.3	106.3	86.8	82.7	98.4	99	97.5	97	67.2	87.3	74.2	38	42	43.2	36.8	17.2	52.8	43.1	45.3	47	19.9	44.8	30	3	650.006	9.11	0.00591	16.6851	7.779e-05	6.845e-05	2.41
988	High	[K].NSLENYAYNMK.[N]	1xOxidation [M10]; 1xTMTpro [K11]; 1xTMTpro [N-Term]	0.000133789	1	2	1	A0A6P6X2U6	A0A6P6X2U6 [546-556]	A0A6P6X2U6; A0A6P6X4Y9	0	1971.01	11	87.1	113.3	96.1	107.1	121.2	113	103.8	100.9	108.9	122.1	118.1	112.4	72.3	131.6	119.1	138.5	76.9	185	137.9	143	161.1	110.3	185	138.7	3	657.679	4.91	0.00323	28.5335	7.779e-05	4.613e-05	3.11
989	High	[R].NPSADMLLTPEELNLDLIR.[S]	1xTMTpro [N-Term]	0.000133789	1	1	2	A0A6P6WVT7	A0A6P6WVT7 [116-134]	A0A6P6WVT7	0	2458.32	19	101	117.7	113.5	97.6	102.5	117	117.8	102.4	97.1	103	93.1	80.5	109.8	179	184.2	165.3	85.1	250.6	204.7	189.9	187.9	121.8	190.9	130.1	3	820.12	10.69	0.00876	52.584	7.779e-05	5.61e-11	5.39
990	High	[R].NPSADMLLQETELDLDLIR.[K]	1xTMTpro [N-Term]	0.000133789	1	4	1	A0A6P6TG62	A0A6P6TG62 [184-202]	A0A6P6TG62; A0A6P6THI6; A0A6P6TDY6; A0A6P6TMQ9	0	2490.31	19	91.9	92.3	87.9	112.2	131.9	117	107.2	95.9	112.8	129.5	105.5	113.8	46.7	65.6	66.7	88.8	51.2	117.2	87.1	83.2	102.1	71.6	101.1	86	3	830.777	3.04	0.00253	54.2136	7.779e-05	1.747e-08	5.24
991	High	[K].NPRPLDEDDIALLK.[T]	1xTMTpro [K14]; 1xTMTpro [N-Term]	0.000133789	1	1	2	A0A6P6XIR9	A0A6P6XIR9 [18-31]	A0A6P6XIR9	0	2217.27	14	89.2	100.3	96.3	98.1	127.6	104.5	94	98.8	106	128.8	104.2	117.6	168.2	264.6	271	288	183.8	388.5	283.4	317.8	355.9	264.3	370.7	329.7	3	739.766	4.74	0.00351	41.4609	7.779e-05	1.539e-08	4.43
992	High	[R].NMSVIAHVDHGK.[S]	1xTMTpro [K12]; 1xTMTpro [N-Term]	0.000133789	1	4	1	A0A6P6U1Q3	A0A6P6U1Q3 [21-32]	A0A6P6S6Q4; A0A6P6U1Q3; A0A6P6TR19; A0A6P6SES8	0	1916.07	12	63.8	76.3	76	81.3	229.4	74.4	76.1	74.2	76.5	281	81	93.5	25.7	43	45.7	51	70.6	59.1	49	51	54.9	123.2	61.6	56	4	479.775	5.75	0.00275	21.0462	7.779e-05	2.912e-05	2.75
993	High	[K].NMITGTSQADCAVLIIDSTTGGFEAGISK.[D]	1xCarbamidomethyl [C11]; 1xTMTpro [K29]; 1xTMTpro [N-Term]	0.000133789	2	3	1	A0A6P6XH24; A0A6P6X663	A0A6P6XH24 [101-129]; A0A6P6X663 [101-129]	A0A6P6W0Y2; A0A6P6XH24; A0A6P6X663	0	3565.84	29	63.5	78.1	82	105.8	186.5	114.4	70.4	80.1	93.2	186.6	107	115.6	29.7	51.1	57.2	77	66.6	105.4	52.6	63.9	77.6	94.9	94.4	80.3	4	892.222	7.79	0.00694	51.7753	7.779e-05	1.778e-14	6.03
994	High	[R].NMGSELDNALK.[A]	1xOxidation [M2]; 1xTMTpro [K11]; 1xTMTpro [N-Term]	0.000133789	1	1	1	A0A6P6V8X6	A0A6P6V8X6 [117-127]	A0A6P6V8X6	0	1815.98	11	71.9	73.6	71.9	74.6	69.9	76.2	100.3	104.9	105.3	92.7	85.1	79.6	92	131.8	137.3	148.6	68.3	192.2	205.1	229	239.8	129	205.4	151.4	3	606.001	5.97	0.00361	25.03	7.779e-05	5.5e-05	3.04
995	High	[R].NMGSELDNALK.[A]	1xTMTpro [K11]; 1xTMTpro [N-Term]	0.000133789	1	1	2	A0A6P6V8X6	A0A6P6V8X6 [117-127]	A0A6P6V8X6	0	1799.98	11	61.2	72.8	67.9	95.4	116.1	114.8	133.1	147.7	155	157.6	133.9	127.3	88.6	147.5	146.7	215.1	128.3	327.6	308	364.7	399.6	248.2	365.7	273.9	2	900.501	7.21	0.00649	36.7522	7.779e-05	9.472e-07	3.3
996	High	[R].NMAAGQEVK.[D]	1xTMTpro [K9]; 1xTMTpro [N-Term]	0.000133789	1	6	2	A0A6P6W843	A0A6P6W843 [62-70]	A0A6P6VL70; A0A6P6W843; A0A6P6VL36; A0A6P6W6W7; A0A6P6W4F8; A0A6P6W5L6	0	1555.88	9	117.9	118.1	129.1	87.5	97.1	84.6	83.6	87.4	95.5	76.6	80.4	73.3	159.5	223.5	260.7	184.4	100.3	225.5	180.8	201.7	230	112.8	205.3	147.4	2	778.447	7.45	0.0058	18.3236	7.779e-05	3.852e-06	3.3
997	High	[K].NLYVMDALEGEAGGLYR.[L]	1xOxidation [M5]; 1xTMTpro [N-Term]	0.000133789	1	1	1	A0A6P6UQ87	A0A6P6UQ87 [536-552]	A0A6P6UQ87	0	2191.1	17																									3	731.047	10.54	0.0077	44.3922	7.779e-05	0.0001802	3.01
998	High	[K].NLYVMDALEGEAGGLYR.[L]	1xTMTpro [N-Term]	0.000133789	1	1	1	A0A6P6UQ87	A0A6P6UQ87 [536-552]	A0A6P6UQ87	0	2175.11	17	114.3	124.8	132	94.1	94.7	102.3	106.8	81.7	113.7	98.4	99	86.6	50.6	77.3	87.2	64.9	32	89.2	75.6	61.7	89.6	47.4	82.7	57	3	725.713	7.13	0.00517	49.5346	7.779e-05	8.187e-09	4.66
999	High	[K].NLYIMDALEGETGGLSR.[L]	1xOxidation [M5]; 1xTMTpro [N-Term]	0.000133789	1	2	1	A0A6P6UWU1	A0A6P6UWU1 [536-552]	A0A6P6UWU1; A0A6P6UKE0	0	2159.1	17	137	112.1	117.9	89	130.4	83.5	98.7	110.6	100.5	113.2	91	78.1	40.7	46.6	52.3	41.2	29.6	48.9	46.9	56.1	53.2	36.6	51	34.5	3	720.377	8.61	0.0062	44.8119	7.779e-05	5.698e-08	4.12
1000	High	[K].NLYIMDALEGETGGLSR.[L]	1xTMTpro [N-Term]	0.000133789	1	2	1	A0A6P6UWU1	A0A6P6UWU1 [536-552]	A0A6P6UWU1; A0A6P6UKE0	0	2143.1	17	89.7	140.5	131.5	75.5	43.4	92.8	89.9	95.8	88.9	49.4	91	66.6	146.1	320.3	319.8	191.6	54	297.9	234.2	266.3	257.9	87.6	279.8	161.2	2	1072.07	10.21	0.01094	49.3965	7.779e-05	1.123e-09	3.97
1001	High	[K].NLYEQVNAIASR.[K]	1xTMTpro [N-Term]	0.000133789	2	10	4	A0A6P6WU84; A0A6P6WR01	A0A6P6WU84 [248-259]; A0A6P6WR01 [252-263]	A0A6P6WU84; A0A6P6WR01; A0A6P6WNH3; A0A6P6WNF9; A0A6P6WNT4; A0A6P6WQP8; A0A6P6WNY8; A0A6P6X3M0; A0A6P6WV83; A0A6P6WNT0	0	1681.92	12	94.6	124.4	122.6	87.5	71.1	87.6	92.7	86.8	84.1	69.2	142	114.3	240.7	442.9	465.7	346.6	138.2	439	377	376.7	380.9	191.5	681.4	432.1	2	841.469	7.11	0.00598	39.3234	7.779e-05	1.205e-07	3.22
1002	High	[R].NLVVVSSPELAK.[D]	1xTMTpro [K12]; 1xTMTpro [N-Term]	0.000133789	1	4	1	A0A6P6ULM4	A0A6P6ULM4 [77-88]	J7FTU8; A0A6P6WX10; A0A6P6ULM4; A0A6P6T2C2	0	1864.14	12	91.1	82.7	83	102.9	125.9	109.4	88.2	108.8	82.9	127.2	108.3	133.9	55.8	70.9	75.9	98.2	58.9	132	86.4	113.7	90.4	84.8	125.1	121.9	3	622.055	5.73	0.00356	42.0034	7.779e-05	0.0001659	3.48
1003	High	[R].NIVVPGYEK.[G]	1xTMTpro [K9]; 1xTMTpro [N-Term]	0.000133789	1	2	2	A0A6P6W0E5	A0A6P6W0E5 [390-398]	A0A6P6W0E5; A0A6P6VUE7	0	1626.97	9	110.6	112.3	112.4	94.5	115.4	113.2	93.6	94	99.2	100.7	92.3	77.5	517.2	734.9	784.6	688	412.3	1043.1	699.8	749.7	826.1	512.6	814.2	538.4	2	813.996	8.36	0.0068	35.2566	7.779e-05	0.000366	2.98
1004	High	[K].NLVMAEEIEK.[A]	1xOxidation [M4]; 1xTMTpro [K10]; 1xTMTpro [N-Term]	0.000133789	2	6	1	A0A6P6T0C5; A0A6P6SKR4	A0A6P6T0C5 [414-423]; A0A6P6SKR4 [414-423]	A0A6P6T0C5; A0A6P6T1H7; A0A6P6T3X7; A0A6P6SLA1; A0A6P6SKR4; A0A6P6SNR8	0	1800.01	10	74.8	75.9	63.7	94.4	140.3	101.6	121.6	130.7	131.4	151.6	119.4	120.8	64.1	91	81.5	126	91.8	171.6	166.6	191.1	200.6	141.4	193	153.9	3	600.678	6.76	0.00405	33.0648	7.779e-05	0.000225	3.3
1005	High	[R].NIVEQAAVR.[D]	1xTMTpro [N-Term]	0.000133789	2	2	4	A0A6P6WEL2; A0A6P6ULP4	A0A6P6WEL2 [43-51]; A0A6P6ULP4 [43-51]	A0A6P6WEL2; A0A6P6ULP4	0	1303.77	9	93	118.2	107.5	85.6	58.1	98.4	102.8	110.4	102.4	60.2	102.6	84	335.9	597	579.3	481.5	160.3	700.1	593.7	680.3	658.1	236.3	698.7	451	2	652.389	4.58	0.00299	20.9034	7.779e-05	6.678e-05	2.71
1006	High	[R].NITVNEAQSR.[G]	1xTMTpro [N-Term]	0.000133789	1	1	1	A0A6P6VRR9	A0A6P6VRR9 [78-87]	A0A6P6VRR9	0	1435.78	10	59.4	82.4	65.1	64.2	40.2	67.5	74.5	77	74	34.7	84	70.7	15.1	29.3	24.7	25.4	7.8	33.8	30.3	33.4	33.5	9.6	40.3	26.7	3	479.268	5.16	0.00247	14.2726	7.779e-05	0.0002065	2.89
1007	High	[K].NITTDFKVDTNSK.[V]	2xTMTpro [K7; K13]; 1xTMTpro [N-Term]	0.000133789	1	1	1	A0A6P6VEM4	A0A6P6VEM4 [64-76]	A0A6P6VEM4	1	2395.36	13	91.9	101.8	95.5	100.2	95.6	104.3	97.2	126.1	106	128.5	133.5	88.5	228.3	353.6	354	387.7	181.4	510.5	385.8	534.5	468.9	347.2	625.3	326.6	3	799.132	7.47	0.00596	33.8585	7.779e-05	9.145e-05	1.79
1008	High	[K].NISTGEVLVK.[H]	1xTMTpro [K10]; 1xTMTpro [N-Term]	0.000133789	1	1	1	A0A6P6V5A0	A0A6P6V5A0 [336-345]	A0A6P6V5A0	0	1668.02	10	82.4	92.9	67.2	89.5	126.5	88.9	104.1	108.7	96.5	164.5	139.4	141.8	65.2	102.8	79.4	110.3	76.4	138.6	131.7	146.7	136	141.6	208.1	166.7	3	556.681	6.09	0.00339	35.1722	7.779e-05	0.0002455	3.27
1009	High	[R].NLSQQNLNALVK.[V]	1xTMTpro [K12]; 1xTMTpro [N-Term]	0.000133789	1	2	1	A0A6P6VVB6	A0A6P6VVB6 [439-450]	A0A6P6VVB6; A0A6P6VV67	0	1950.16	12	71.1	72.7	69.4	88.3	95.4	85.2	81.8	80.1	83.5	134.1	126.4	132	116.7	167.1	170	225.9	119.6	275.7	214.8	224.3	244.1	239.6	391.4	322.2	3	650.731	8.72	0.00567	39.9544	7.779e-05	5.55e-05	4.01
1010	High	[K].NISFTVWDVGGQDK.[I]	1xTMTpro [K14]; 1xTMTpro [N-Term]	0.000133789	1	3	2	A0A6P6T750	A0A6P6T750 [60-73]	A0A6P6T750; A0A6P6V4W9; A0A6P6VZH0	0	2174.17	14	84.2	92.7	87.2	102.9	106.1	104.6	94.6	97.4	88	122.5	130.7	143.6	275.1	423.5	425	523.5	264.8	673.5	494.4	543	512.1	435.3	805.4	697.6	2	1087.6	10.51	0.01142	47.0426	7.779e-05	1.08e-10	4.99
1011	High	[K].NLSESTTDEDLKK.[V]	2xTMTpro [K12; K13]; 1xTMTpro [N-Term]	0.000133789	1	2	3	A0A6P6WBY2	A0A6P6WBY2 [216-228]	A0A6P6WBY2; A0A6P6VTZ6	1	2392.34	13	93.3	90.3	95.5	103.3	108	93.8	101.7	93.1	101.1	96	89	94.3	341.6	462.4	522	589	302	676.8	595.3	581.4	659.1	382.4	614.7	513.3	3	798.122	5.25	0.00418	23.7846	7.779e-05	2.073e-09	3.77
1012	High	[K].NLSDSTTDEDLKK.[V]	2xTMTpro [K12; K13]; 1xTMTpro [N-Term]	0.000133789	1	2	2	A0A6P6VSD8	A0A6P6VSD8 [218-230]	A0A6P6VSD8; A0A6P6WD28	1	2378.32	13	110.8	104.2	108.1	113.9	119.7	102.2	120.1	121.6	118.3	94.4	89.6	99.3	177.7	233.8	258.9	284.7	146.7	323.2	308	332.7	338	164.7	271.3	236.9	3	793.451	7.06	0.0056	23.8441	7.779e-05	5.589e-07	3.23
1013	High	[R].NLQEFVDEIR.[R]	1xTMTpro [N-Term]	0.000133789	1	1	1	A0A6P6VVW3	A0A6P6VVW3 [460-469]	A0A6P6VVW3	0	1566.84	10	113.4	185.3	172.6	106.4	61.8	110.1	110.3	114.6	112.2	56.7	108.2	91.4	42.3	96.7	96.1	61.8	17.6	80.9	65.8	72.9	74.5	23	76.1	50.7	2	783.932	7.69	0.00603	45.8724	7.779e-05	0.0001145	2.78
1014	High	[R].NLQDAMSVAR.[N]	1xTMTpro [N-Term]	0.000133789	1	2	1	A0A6P6UFQ5	A0A6P6UFQ5 [390-399]	A0A6P6UFQ5; A0A6P6U9J5	0	1408.75	10	78.6	114.4	108.6	92.3	55.2	105.9	99.1	98.2	103.2	60.3	124.2	88.1	175.4	357	361.6	320.9	94	465.5	353.6	374	410.2	146.4	523	292.3	2	704.884	4.29	0.00302	28.9238	7.779e-05	2.183e-05	2.76
1015	High	[R].NIPGVEVAHVDR.[L]	1xTMTpro [N-Term]	0.000133789	1	2	1	A0A6P6TJ75	A0A6P6TJ75 [228-239]	A0A6P6TJ75; A0A6P6UDV6	0	1609.9	12	90	107	132.3	127.3	52.1	122.9	81.2	102.2	120.3	66.6	152.4	112.5	11.3	18.8	24.8	24.9	5	30.4	16.3	21.9	26.9	9.1	36.1	21	3	537.308	6.1	0.00327	23.6401	7.779e-05	1.945e-07	3.83
1016	High	[K].NIPGVDIAGGDGFPTK.[V]	1xTMTpro [K16]; 1xTMTpro [N-Term]	0.000133789	1	2	1	A0A6P6X0A1	A0A6P6X0A1 [593-608]	A0A6P6X0A1; A0A6P6WKF4	0	2166.21	16	66.6	64.4	62.6	97.5	140	93.9	83.2	87.8	84.6	100.1	74.6	81.7	65.8	89.1	92.3	150.1	105.7	183	131.5	148.1	149	107.7	139.1	120	3	722.746	8.12	0.00586	44.3213	7.779e-05	1.241e-08	4.28
1017	High	[R].NIPGIEVAHVDR.[L]	1xTMTpro [N-Term]	0.000133789	1	1	1	A0A6P6U7T2	A0A6P6U7T2 [228-239]	A0A6P6U7T2	0	1623.91	12	118.1	122.1	121.1	92.3	82.9	130.3	128.9	126.4	115.9	69.5	116.3	91.2	34.5	49.9	52.8	42	18.5	75	60.2	63	60.3	22.1	64.1	39.6	3	541.98	7.15	0.00387	28.4701	7.779e-05	5.748e-09	3.98
1018	High	[K].NLPATCTSR.[M]	1xCarbamidomethyl [C6]; 1xTMTpro [N-Term]	0.000133789	2	2	2	A0A6P6U5Y9; A0A6P6TRF4	A0A6P6U5Y9 [234-242]; A0A6P6TRF4 [234-242]	A0A6P6U5Y9; A0A6P6TRF4	0	1323.7	9	96.2	142.8	120.1	104	45.5	111.3	132.4	136.6	115.3	49	141.3	108.3	151.1	313.7	281.4	254.3	54.6	344.3	332.5	366	322.4	83.8	418.5	252.7	2	662.358	5.61	0.00371	13.9864	7.779e-05	0.0002608	2.09
1019	High	[R].NINSNVEDSELR.[S]	1xTMTpro [N-Term]	0.000133789	1	7	1	A0A6P6SDJ0	A0A6P6SDJ0 [225-236]	A0A6P6SDJ0; A0A6P6V338; A0A6P6SCK1; A0A6P6SCE7; A0A6P6UFD3; A0A6P6SDJ1; A0A6P6SEC7	0	1693.87	12	94.6	127.9	118.1	92.3	57.9	94.7	113.9	117.8	96.8	63.5	102.3	78.6	122	230.8	227.3	185.4	57	240.6	234.9	259.3	222.4	89.1	248.8	150.7	2	847.442	4.9	0.00415	19.7388	7.779e-05	6.523e-07	3.6
1020	High	[R].NLNLIIEPGR.[S]	1xTMTpro [N-Term]	0.000133789	1	2	1	A0A6P6VRS2	A0A6P6VRS2 [332-341]	A0A6P6VRS2; A0A6P6WC87	0	1442.87	10	107.4	132.7	108.3	95.5	45	105.5	119.1	118.9	116.8	45.4	128.7	100.6	25	43.2	37.6	34.6	8	48.4	44.3	47.2	48.4	11.5	56.5	34.8	2	721.94	5.84	0.00422	42.2529	7.779e-05	0.0002269	2.7
1021	High	[K].NMVESLTVPTFR.[V]	1xTMTpro [N-Term]	0.000133789	1	4	1	A0A6P6V569	A0A6P6V569 [261-272]	A0A6P6V569; A0A6P6V4C9; A0A6P6V7H9; A0A6P6V6B2	0	1697.92	12	102.9	95.3	93.9	87.1	115.8	97.2	84.2	85.6	89.8	95.4	79.2	74.9	60.5	78.4	82.4	79.7	52	112.6	79.1	85.8	94	61	87.8	65.4	3	566.651	10.38	0.00588	45.0502	7.779e-05	0.0001259	3.22
1022	High	[K].NMVVEAELGR.[L]	1xTMTpro [N-Term]	0.000133789	1	3	2	A0A6P6X779	A0A6P6X779 [1197-1206]	A0A6P6XHC1; A0A6P6X779; A0A6P6X572	0	1421.77	10	93.2	93.4	87.7	77	98.4	89.5	97.9	97.6	92.8	86	96.3	91.3	240.9	337.8	338.4	310.1	194.4	456.2	404.6	430.8	427.2	242	469.9	351	2	711.394	4.24	0.00302	31.0587	7.779e-05	0.0001366	1.75
1023	High	[K].NNAFPSASPDGK.[W]	1xTMTpro [K12]; 1xTMTpro [N-Term]	0.000133789	1	2	2	A0A6P6UWU1	A0A6P6UWU1 [512-523]	A0A6P6UWU1; A0A6P6UKE0	0	1812.97	12	139.7	149.8	153.2	83.5	92	81.4	74.1	71.9	72.8	69.7	69.8	60.3	341.8	513.1	559.5	318.3	171.9	392.6	290.1	300.2	317.5	185.5	322.3	219.2	2	906.996	6.11	0.00554	23.4393	7.779e-05	1.579e-05	4.23
1024	High	[K].NNAGFPHNVVFDEDGVPSGVDASK.[I]	1xTMTpro [K24]; 1xTMTpro [N-Term]	0.000133789	1	1	5	A0A6P6SMX6	A0A6P6SMX6 [99-122]	A0A6P6SMX6	0	3080.56	24	151.3	124.8	136.2	69.9	80.3	74.7	67.1	67.5	74.2	95.2	79.7	73.8	1008.4	1164.2	1354.9	726.1	408.7	981.7	715.7	767.7	881.4	690.8	1002	731.4	3	1027.53	7.36	0.00756	39.9428	7.779e-05	2.613e-15	5.74
1025	High	[K].NPPGADQLDR.[A]	1xTMTpro [N-Term]	0.000133789	1	1	4	A0A6P6VED9	A0A6P6VED9 [95-104]	A0A6P6VED9	0	1386.73	10	87.4	126.6	134.7	95.1	55.3	92.8	105	123.3	97.1	42.2	95.8	77.7	313.4	635.5	721.1	531.2	151.5	655.9	602.4	754.3	620.3	164.5	648.1	414.1	2	693.872	4.58	0.00318	14.8243	7.779e-05	0.0003058	1.62
1026	High	[K].NPNPIPIPLVDINYLVESEGRK.[L]	1xTMTpro [K22]; 1xTMTpro [N-Term]	0.000133789	1	2	1	A0A6P6WTN6	A0A6P6WTN6 [82-103]	A0A6P6WTN6; A0A6P6WTS2	1	3085.75	22	90.1	91.4	92.8	119.9	142.7	122.6	102.7	94.8	94.6	110.5	99	92.1	48.2	68.4	74.1	99.9	58.3	129.2	87.8	86.5	90.1	64.3	99.9	73.2	4	772.202	10.34	0.00797	52.8784	7.779e-05	3.146e-09	4.91
1027	High	[K].NPNFLGCTENALGIR.[Q]	1xCarbamidomethyl [C7]; 1xTMTpro [N-Term]	0.000133789	1	3	1	A0A6P6T816	A0A6P6T816 [52-66]	A0A6P6U8K2; A0A6P6U7Q8; A0A6P6T816	0	1980.03	15	134.1	120.4	142.7	88.8	98.5	101.1	113.3	99.7	107.1	129.5	144.1	100.2	25.3	31.8	40.2	26.1	14.2	37.6	34.2	32.1	36	26.6	51.3	28.1	3	660.688	10.39	0.00686	45.0417	7.779e-05	5.107e-08	3.2
1028	High	[K].NPNFLGCTENALAIR.[Q]	1xCarbamidomethyl [C7]; 1xTMTpro [N-Term]	0.000133789	1	2	1	A0A6P6UES8	A0A6P6UES8 [52-66]	A0A6P6UES8; A0A6P6UGG8	0	1994.04	15	104.7	100	90.6	89.6	146.7	88.2	97.9	90.2	89.3	139.8	94.7	104	57	76.2	73.6	76	61	94.6	85.2	83.8	86.6	82.8	97.3	84.2	3	665.358	7.73	0.00514	44.1429	7.779e-05	5.256e-05	2.91
1029	High	[K].NPLNYTQVSVLADDILK.[N]	1xTMTpro [K17]; 1xTMTpro [N-Term]	0.000133789	1	2	2	A0A6P6WVP4	A0A6P6WVP4 [174-190]	A0A6P6WVP4; A0A6P6WRW5	0	2511.43	17	79.5	65.1	77.9	101.6	144.3	106.8	101.2	105.7	111.9	183.5	113.3	129	65.3	74.8	95.4	129.9	90.5	172.8	132.9	148	163.6	163.9	175.5	157.4	3	837.822	8.22	0.00688	53.1544	7.779e-05	7.428e-09	4.55
1030	High	[K].NPLDLLPPSK.[M]	1xTMTpro [K10]; 1xTMTpro [N-Term]	0.000133789	1	2	1	A0A6P6URD0	A0A6P6URD0 [263-272]	A0A6P6URD0; A0A6P6UK08	0	1702.04	10	103.3	105.6	98	119.8	156.4	110.8	96.5	90.1	99.6	116	93	102.3	41.6	59.5	58.9	75.1	48.1	87.9	62.1	61.9	71.4	50.8	70.6	61.2	3	568.023	9.46	0.00537	46.4154	7.779e-05	0.0001057	2.93
1031	High	[R].NPGQLEVVPEFVFSCSER.[S]	1xCarbamidomethyl [C15]; 1xTMTpro [N-Term]	0.000133789	1	1	1	A0A6P6V2W7	A0A6P6V2W7 [229-246]	A0A6P6V2W7	0	2398.2	18																									3	800.081	10.21	0.00816	48.9404	7.779e-05	7.682e-06	4.01
1032	High	[R].NPGPLQFDGPGADAK.[S]	1xTMTpro [K15]; 1xTMTpro [N-Term]	0.000133789	1	1	2	A0A6P6UKW6	A0A6P6UKW6 [539-553]	A0A6P6UKW6	0	2092.13	15	82.5	108.2	98	84	102.4	92.6	94.2	92.6	96.8	98	97.6	90.9	215.9	396.3	382.7	342.3	204.7	477.4	394.1	413.7	451.4	279	482.1	353.8	3	698.055	8.87	0.00618	36.3451	7.779e-05	1.889e-08	4.26
1033	High	[K].NPFTIFTDSK.[T]	1xTMTpro [K10]; 1xTMTpro [N-Term]	0.000133789	1	1	1	A0A6P6TLS1	A0A6P6TLS1 [141-150]	A0A6P6TLS1	0	1778	10	74.6	89	97.9	102.1	111.3	94.4	101.3	108.9	104.8	164.5	140.5	155.1	49.4	82.5	96.8	105.4	56.3	123.2	107.3	123.1	123.6	118.6	175.6	152.7	3	593.342	7.22	0.00428	48.9351	7.779e-05	0.0003186	3.45
1034	High	[R].NPELANLLVDPEFAK.[E]	1xTMTpro [K15]; 1xTMTpro [N-Term]	0.000133789	1	1	1	A0A6P6V7J4	A0A6P6V7J4 [391-405]	A0A6P6V7J4	0	2278.29	15	58.5	62	69.3	99.1	136.7	95.9	76.5	83.6	88.6	146.8	99.8	159.2	53	78.6	93.6	139.7	94.5	171.2	110.8	129.2	142.9	144.6	170.5	214.3	3	760.106	4.64	0.00352	49.7604	7.779e-05	5.546e-09	5.29
1035	High	[K].NPEEVELFQFMGK.[D]	1xTMTpro [K13]; 1xTMTpro [N-Term]	0.000133789	1	3	1	A0A6P6WUK5	A0A6P6WUK5 [302-314]	A0A6P6WUK5; A0A6P6WNJ6; A0A6P6WTI3	0	2176.16	13	66.4	73.9	74.5	73.3	106.4	74.6	75	66.7	67	101.5	86.6	92	58	90.3	97.2	99.8	71	128.4	104.7	99.5	104.3	96.5	142.7	119.5	3	726.065	9.47	0.00687	50.0393	7.779e-05	0.0003689	3.63
1036	High	[R].NPEEIPWGETGAEFVVESTGVFTDKDK.[A]	2xTMTpro [K25; K27]; 1xTMTpro [N-Term]	0.000133789	1	1	27	A0A6P6VCK4	A0A6P6VCK4 [83-109]	A0A6P6VCK4	1	3894.03	27	64.1	66.9	74.6	121	175.6	143.9	91.9	87.6	113.8	159.9	100.8	97.6	1358.4	1984.5	2361.6	3994.7	2842.9	6011.3	3112.9	3168.3	4295	3688.3	4030.9	3074	3	1298.69	6.25	0.00812	53.6681	7.779e-05	2.015e-20	6.54
1037	High	[R].NPEEIPWGETGAEFVVESTGVFTDKDK.[A]	2xTMTpro [K25; K27]	0.000133789	1	1	2	A0A6P6VCK4	A0A6P6VCK4 [83-109]	A0A6P6VCK4	1	3589.82	27	71.2	59.5	72.3	108.4	267.9	108.6	76.4	70.8	97.8	243.4	79.3	83.3	134.9	157.6	204.4	319.7	387.4	405.3	231.2	228.7	329.7	501.5	283.4	234.5	3	1197.29	7.73	0.00925	50.994	7.779e-05	8.939e-11	5.8
1038	High	[R].NPEDEKYVHLK.[K]	2xTMTpro [K6; K11]; 1xTMTpro [N-Term]	0.000133789	2	4	2	A0A6P6VUZ5; A0A6P6WJ83	A0A6P6VUZ5 [42-52]; A0A6P6WJ83 [42-52]	A0A6P6WJ69; A0A6P6VUZ5; A0A6P6WEF8; A0A6P6WJ83	1	2284.31	11	96.5	87.4	98.3	106.3	130.2	121.6	99.3	93.8	111.7	102	85.6	56.4	188.4	238.8	286.3	323.3	194.2	468	309.9	312.4	388.4	216.7	315.2	163.6	3	762.112	4.57	0.00348	25.2389	7.779e-05	5.513e-05	2.87
1039	High	[K].LNSFADMTNHEFR.[E]	1xTMTpro [N-Term]	0.000133789	2	2	3	A0A6P6VAA7; A0A6P6UXR6	A0A6P6VAA7 [84-96]; A0A6P6UXR6 [84-96]	A0A6P6VAA7; A0A6P6UXR6	0	1885.92	13	112.3	121.4	153.1	84.8	88	79.4	63.9	67.2	74.2	70.1	71	65.4	412.7	623.8	839.5	485.2	247	575.1	375.5	421.5	485.4	280.2	491.8	357	3	629.314	3.96	0.00249	37.2487	7.779e-05	4.043e-07	5.34
1040	High	[R].NPEALESTTLQASDQAYQFLR.[K]	1xTMTpro [N-Term]	0.000133789	1	2	3	A0A6P6ULZ9	A0A6P6ULZ9 [153-173]	A0A6P6ULZ9; A0A6P6UL37	0	2686.36	21	81.9	85.2	86.9	75.4	114.9	80.1	86.9	81.2	83.3	112	88.7	92.5	145.7	212.1	230.9	208.9	156.2	280.9	247.3	246.5	263.9	216.8	297.8	244.6	3	896.134	8.78	0.00786	49.2122	7.779e-05	9.419e-11	4.96
1041	High	[R].NPDLVATDPTVSFK.[T]	1xTMTpro [K14]; 1xTMTpro [N-Term]	0.000133789	1	1	3	A0A6P6TAH2	A0A6P6TAH2 [159-172]	A0A6P6TAH2	0	2112.18	14	67.5	78.8	70	80.9	98.2	97.9	116	106.7	115.1	147.5	128.9	122	218.5	357	338.2	408.2	242.9	625.1	600.5	589.4	663.9	519.9	787.4	587.5	2	1056.6	5.97	0.0063	42.7004	7.779e-05	4.097e-09	4.24
1042	High	[R].NPDLVATDPTVSFK.[T]	1xTMTpro [K14]	0.000133789	1	1	1	A0A6P6TAH2	A0A6P6TAH2 [159-172]	A0A6P6TAH2	0	1807.98	14	48.6	59.3	58.3	81	195.3	82	91.4	96.8	121.3	332.5	119.5	118.2	35.9	61.3	64.3	93.3	110.3	119.5	108	122.1	159.7	267.5	166.6	129.9	2	904.499	8.45	0.00764	39.22	7.779e-05	3.18e-06	3.2
1043	High	[R].NPALANLLVDPEFAR.[E]	1xTMTpro [N-Term]	0.000133789	1	2	2	A0A6P6TZS3	A0A6P6TZS3 [395-409]	A0A6P6TZS3; A0A6P6TUB6	0	1944.09	15	86.8	132.3	107.7	82.8	39.2	110.8	104.4	123.1	108	54.2	132.2	93.7	161	343.4	298.2	239.2	55.5	405	309.8	389.6	356.8	109.4	462.6	258.5	2	972.552	4.94	0.0048	49.1847	7.779e-05	8.268e-09	3.9
1044	High	[R].NPAFLDWEVK.[E]	1xTMTpro [K10]; 1xTMTpro [N-Term]	0.000133789	2	2	2	A0A6P6SQ25; A0A6P6T1Q1	A0A6P6SQ25 [181-190]; A0A6P6T1Q1 [181-190]	A0A6P6SQ25; A0A6P6T1Q1	0	1827.03	10	78.2	104.7	106.9	111.6	131.2	131	110	108.2	121.5	143.5	130.5	143.7	55.6	104.2	113.5	123.7	71.3	183.7	125.1	131.3	153.9	111.1	175.1	152	2	914.026	8.79	0.00803	47.261	7.779e-05	1.253e-06	2.98
1045	High	[R].NNQELLDGVRR.[C]	1xTMTpro [N-Term]	0.000133789	1	2	1	A0A6P6U3Y0	A0A6P6U3Y0 [493-503]	A0A6P6TN37; A0A6P6U3Y0	1	1617.9	11	90.6	136.7	106.4	97.9	59.3	94	120	121.2	104.7	58	106.8	88.6	49.4	104.3	86.6	83.2	24.7	101.1	104.7	112.8	101.7	34.4	109.9	71.8	3	539.974	5.45	0.00294	17.2622	7.779e-05	4.725e-05	3.72
1046	High	[R].NNQELLDGVR.[R]	1xTMTpro [N-Term]	0.000133789	1	2	1	A0A6P6U3Y0	A0A6P6U3Y0 [493-502]	A0A6P6TN37; A0A6P6U3Y0	0	1461.8	10	99.5	130.1	110	84.9	56.5	99.4	104.6	104.2	96.9	51.6	103.8	77.1	198.4	363.1	327.4	263.6	86.1	390.5	333.6	354.6	344	111.9	390.5	228.5	2	731.408	7.48	0.00547	23.7633	7.779e-05	4.322e-06	3.46
1047	High	[K].NNPVIIGEPGVGK.[T]	1xTMTpro [K13]; 1xTMTpro [N-Term]	0.000133789	1	3	1	A0A6P6U2T4	A0A6P6U2T4 [192-204]	A0A6P6U2T4; A0A6P6U386; A0A6P6U4I8	0	1902.13	13	65.3	83.7	83.8	117.8	157.6	114.8	85.7	94.9	97	124.5	108.6	108.3	35.7	64	68.4	100.3	65.8	123.7	74.9	88.5	94.5	74.1	112	88	3	634.719	6.41	0.00407	36.4818	7.779e-05	6.607e-07	3.92
1048	High	[R].NNLQHPNEYIR.[G]	1xTMTpro [N-Term]	0.000133789	1	2	1	A0A6P6ST63	A0A6P6ST63 [103-113]	A0A6P6T581; A0A6P6ST63	0	1701.9	11	97.3	133.1	108.5	109.8	49.9	95.7	115.8	107.7	107.9	78.9	130.1	98.5	28.1	53.8	46.8	49.4	11	54.5	53.5	53.1	55.5	24.8	70.9	42.3	3	567.975	6.04	0.00343	14.7534	7.779e-05	6.854e-07	3.57
1049	High	[K].NNLEGYIYNTK.[E]	1xTMTpro [K11]; 1xTMTpro [N-Term]	0.000133789	1	1	1	A0A6P6XHY1	A0A6P6XHY1 [693-703]	A0A6P6XHY1	0	1937.06	11	88	102.2	99.4	95.7	131.8	119.7	100.3	98.5	108.4	139.4	106.9	96.8	50.5	82.1	85.2	85.6	57.8	135.4	92.1	96.5	110.8	87.1	115.8	82.6	3	646.363	6.66	0.0043	37.9099	7.779e-05	0.0002086	3.34
1050	High	[K].NNEVIAEEISERDEAALK.[F]	1xTMTpro [K18]; 1xTMTpro [N-Term]	0.000133789	1	2	2	A0A6P6SK02	A0A6P6SK02 [134-151]	A0A6P6SK02; A0A6P6SXT6	1	2638.42	18	82.9	98.3	92.1	93.2	101.3	100.1	90.3	87.1	96.3	97.4	97.3	81.3	130.7	216.9	216.9	229.1	122.1	311.3	227.8	234.5	270.6	167.1	289.7	190.7	3	880.151	8.12	0.00714	37.5092	7.779e-05	4.328e-10	3.93
1051	High	[K].NNESDLLAVINNPK.[S]	1xTMTpro [K14]; 1xTMTpro [N-Term]	0.000133789	1	2	1	A0A6P6V0C6	A0A6P6V0C6 [287-300]	A0A6P6V0C6; A0A6P6WJ21	0	2149.21	14	166.8	85.5	112	77.9	135.9	115.8	126.2	99.4	75.2	127.1	82.3	74.4	42.1	30.2	42.2	30.6	26.2	57.6	50.9	42.8	33.8	34.9	39.2	27.9	3	717.081	8.43	0.00604	44.4237	7.779e-05	5.603e-06	3.14
1052	High	[K].NNEAIGIPYPK.[R]	1xTMTpro [K11]; 1xTMTpro [N-Term]	0.000133789	1	1	2	A0A6P6T500	A0A6P6T500 [180-190]	A0A6P6T500	0	1824.05	11	93.7	86.1	90.5	100.2	155.3	120	98.4	104.9	112.9	78.2	72.4	67.4	172.8	222	249.1	287.6	218.6	436	290.1	330	370.7	156.8	251.8	184.6	3	608.693	7.1	0.00432	37.4751	7.779e-05	2.355e-06	2.91
1053	High	[R].NNCPYTVWAAAVPGGGQR.[L]	1xCarbamidomethyl [C3]; 1xTMTpro [N-Term]	0.000133789	1	1	1	A0A6P6TY01	A0A6P6TY01 [31-48]	A0A6P6TY01	0	2222.11	18	97.6	127.2	95.1	111.1	105.2	99.3	104.1	91.1	96	107	127.4	96.6	23.8	43.4	34.6	42.2	19.6	47.7	40.6	37.9	41.7	28.4	58.6	35	3	741.382	10.44	0.00773	40.8058	7.779e-05	2.988e-07	3.75
1054	High	[K].NNAGFPHNVVFDEDGVPSGVDATK.[I]	1xTMTpro [K24]; 1xTMTpro [N-Term]	0.000133789	1	1	2	A0A6P6ULL6	A0A6P6ULL6 [99-122]	A0A6P6ULL6	0	3094.57	24	154.3	116.1	136.8	73.9	95.2	85.1	77.6	80.3	72	118.3	90.7	84.2	237.5	250.2	314.3	177.2	112	258.1	191.1	210.9	197.3	198.2	263.3	192.7	4	774.403	6.11	0.00473	40.499	7.779e-05	9.84e-09	5.21
1055	High	[K].NPDPMELVR.[G]	1xTMTpro [N-Term]	0.000133789	1	2	1	A0A6P6UU15	A0A6P6UU15 [363-371]	A0A6P6UU15; A0A6P6UKX4	0	1374.74	9	106.5	128.1	115.8	103.4	79.5	114.4	122.8	119.7	114.3	75.1	108.5	85.2	96.1	161.7	155.9	145.3	54.8	203.5	177.2	184.3	183.7	73.7	184.6	114.2	2	687.876	5.46	0.00375	34.1952	7.779e-05	1.212e-05	2.49
1056	High	[R].LNSDDKDIQNAAAK.[A]	2xTMTpro [K6; K14]; 1xTMTpro [N-Term]	0.000133789	1	3	1	A0A6P6VUB2	A0A6P6VUB2 [278-291]	A0A6P6VUB2; A0A6P6WB91; A0A6P6VSQ2	1	2415.37	14	98.1	106.7	131.6	104.4	119.9	114.1	93.4	96.2	119.5	94.8	92.6	86.7	163.3	248.6	327.2	270.9	152.5	374.3	248.7	273.3	354.5	171.7	290.8	214.6	3	805.797	3.73	0.003	24.778	7.779e-05	1.132e-06	5.14
1057	High	[R].INSANQMFNSK.[L]	1xOxidation [M7]; 1xTMTpro [K11]; 1xTMTpro [N-Term]	0.000133789	1	2	1	A0A6P6VT21	A0A6P6VT21 [248-258]	A0A6P6VT21; A0A6P6WAH1	0	1878	11	106.4	113.4	92.4	79.6	104.3	92.4	93.1	91.5	85.3	73.1	84	70.3	145	216.3	187.9	169	108.6	248.1	203	212.9	207	108.4	216	142.4	3	626.678	9.04	0.00566	22.4393	7.779e-05	0.000106	3.95
1058	High	[K].LNPRPGIIINRPDGDDVYAGVPK.[D]	1xTMTpro [K23]; 1xTMTpro [N-Term]	0.000133789	1	1	5	A0A6P6TQT4	A0A6P6TQT4 [115-137]	A0A6P6TQT4	0	3084.74	23	112.9	110.7	108.3	83.4	95.5	98	99.7	87.7	107.5	72.6	78.2	58.6	550.3	755.3	788.3	633.5	355.6	942	777.2	730	933.6	385.2	719.1	425	4	771.947	6.5	0.00502	37.6103	7.779e-05	4.159e-07	5.28
1059	High	[R].LAESMAEFVEAK.[T]	1xTMTpro [K12]; 1xTMTpro [N-Term]	0.000133789	1	1	1	A0A6P6WBU4	A0A6P6WBU4 [162-173]	A0A6P6WBU4	0	1933.06	12	125.9	116.7	139.8	113.8	126.2	117.5	89.4	97.1	81.8	119.6	100.3	107.3	77.2	100.1	127.9	108.7	59.1	142	87.6	101.6	89.3	79.8	116	97.8	3	645.031	10.03	0.00646	49.7421	7.779e-05	2.005e-05	3.34
1060	High	[R].LAESLDDLALDIPSAK.[T]	1xTMTpro [K16]; 1xTMTpro [N-Term]	0.000133789	2	2	2	A0A6P6X7U2; A0A6P6XKB2	A0A6P6X7U2 [369-384]; A0A6P6XKB2 [369-384]	A0A6P6X7U2; A0A6P6XKB2	0	2279.3	16	122.6	107	122.2	100.3	117.7	106	99	92	88.6	100	92.8	95.1	111.9	136.7	166.6	142.6	82.1	190.8	144.6	143.3	144.1	99.4	159.8	129.1	3	760.446	10.06	0.00765	51.9228	7.779e-05	4.687e-09	4.39
1061	High	[K].IAESASFKEETNVVEELPDPQKK.[A]	3xTMTpro [K8; K22; K23]; 1xTMTpro [N-Term]	0.000133789	2	2	2	A0A6P6UPC1; A0A6P6UX36	A0A6P6UPC1 [70-92]; A0A6P6UX36 [70-92]	A0A6P6UPC1; A0A6P6UX36	2	3805.14	23	77.8	86.6	93.8	94.2	108.6	123.9	87	86.1	110.9	141.3	93.2	69.6	299.7	466.5	539.5	565.2	319.6	940.1	535.6	565.6	760.7	592	677.2	398.2	4	952.047	7.51	0.00714	42.531	7.779e-05	1.401e-11	5.77
1062	High	[R].IAEQPTCLVELTGQDIIGLPLR.[S]	1xCarbamidomethyl [C7]; 1xTMTpro [N-Term]	0.000133789	1	1	1	A0A6P6WUP1	A0A6P6WUP1 [349-370]	A0A6P6WUP1	0	2740.52	22	99.6	85	89.6	98.7	138.7	109.9	99.6	98.1	93.3	127.1	111	116.8	50.5	60.3	67.8	77.9	53.7	109.8	80.7	84.8	84.2	70.1	106.1	88	3	914.188	9.81	0.00896	54.2793	7.779e-05	2.537e-11	5.33
1063	High	[K].LAEQAERYEEMVEFMEK.[V]	1xOxidation [M15]; 1xTMTpro [K17]; 1xTMTpro [N-Term]	0.000133789	7	9	1	A0A6P6WBG7; A0A6P6V1A1; A0A6P6TAT8; A0A6P6V7M4; A0A6P6UWQ6; A0A6P6TJN8; A0A6P6T9G5	A0A6P6WBG7 [18-34]; A0A6P6V1A1 [12-28]; A0A6P6TAT8 [16-32]; A0A6P6V7M4 [12-28]; A0A6P6UWQ6 [16-32]; A0A6P6TJN8 [14-30]; A0A6P6T9G5 [14-30]	A0A6P6WBG7; A0A6P6V1A1; A0A6P6TAT8; A0A6P6V7M4; A0A6P6UWQ6; A0A6P6TJN8; A0A6P6ULR2; A0A6P6T9G5; A0A6P6VUM6	1	2756.38	17	93.9	85.3	107.8	70.3	84.2	91.8	83.6	87.4	110.6	81.3	88.5	54.8	96.4	122.4	165.1	112.4	66	185.6	137.2	153	202.1	90.8	171.4	83.6	4	689.856	9.37	0.00645	44.8316	7.779e-05	8.586e-05	2.53
1064	High	[K].LAEQAERYEEMVEFMEK.[V]	1xTMTpro [K17]; 1xTMTpro [N-Term]	0.000133789	7	9	1	A0A6P6WBG7; A0A6P6V1A1; A0A6P6TAT8; A0A6P6V7M4; A0A6P6UWQ6; A0A6P6TJN8; A0A6P6T9G5	A0A6P6WBG7 [18-34]; A0A6P6V1A1 [12-28]; A0A6P6TAT8 [16-32]; A0A6P6V7M4 [12-28]; A0A6P6UWQ6 [16-32]; A0A6P6TJN8 [14-30]; A0A6P6T9G5 [14-30]	A0A6P6WBG7; A0A6P6V1A1; A0A6P6TAT8; A0A6P6V7M4; A0A6P6UWQ6; A0A6P6TJN8; A0A6P6ULR2; A0A6P6T9G5; A0A6P6VUM6	1	2740.38	17	76.9	103.9	111.8	106.4	111.9	100.9	92.4	90.9	85.2	86.3	103.9	91.6	137.8	260.6	299.2	297.1	153.2	356.5	264.8	278.1	272.1	168.3	351.4	244	4	685.856	7.39	0.00506	49.1181	7.779e-05	0.0003345	1.93
1065	High	[K].LAEIVEEAEEGEEYGK.[A]	1xTMTpro [K16]; 1xTMTpro [N-Term]	0.000133789	1	1	1	A0A6P6VW58	A0A6P6VW58 [83-98]	A0A6P6VW58	0	2403.24	16	82	74.2	80.5	81.1	114.1	72.2	85.6	84.3	86	116.7	68.5	79.4	77.1	97.6	113	118.8	81.9	133.8	128.6	135.2	143.9	119.3	121.5	111	3	801.76	9.43	0.00755	49.6001	7.779e-05	4.183e-06	3.68
1066	High	[K].LAELSGNGVTTIIGGGDSVAAVEK.[AV]	1xTMTpro [K24]; 1xTMTpro [N-Term]	0.000133789	3	4	1	A0A6P6V940; A0A6P6V011; A0A6P6SDR2	A0A6P6V940 [343-366]; A0A6P6V011 [343-366]; A0A6P6SDR2 [343-366]	A0A6P6V940; A0A6P6V011; A0A6P6SDR9; A0A6P6SDR2	0	2866.6	24	80.1	85.9	101.6	86.4	103.5	101.7	79.4	80.9	82.5	108.2	87.5	80.6	104.4	156.7	197.7	175.3	103	261.3	165.5	179.8	191.6	153.5	215.1	156.2	3	956.216	11.01	0.01052	50.3639	7.779e-05	1.706e-09	5.6
1067	High	[R].LAEHGMADAVIEAQGCEASLNK.[L]	1xCarbamidomethyl [C16]; 1xTMTpro [K22]; 1xTMTpro [N-Term]	0.000133789	1	2	1	A0A6P6WZ16	A0A6P6WZ16 [122-143]	A0A6P6WZ16; A0A6P6WQ50	0	2922.49	22	96.1	91.6	83.2	94	120.3	102.7	101.7	108.4	123.2	127.8	98.8	102.4	86.5	115.4	111.8	131.8	82.7	182.1	146.4	166.5	197.5	125.2	167.8	137	3	974.835	-0.92	-0.0009	40.3872	7.779e-05	2.994e-08	2.64
1068	High	[K].LAEGYLSKPSDSEGSKTDGGDLLK.[M]	3xTMTpro [K8; K16; K24]; 1xTMTpro [N-Term]	0.000133789	2	2	1	A0A6P6V2B4; A0A6P6VC95	A0A6P6V2B4 [244-267]; A0A6P6VC95 [244-267]	A0A6P6V2B4; A0A6P6VC95	1	3684.05	24	108.3	112.3	165.9	62.9	65.5	73.3	53.2	63.7	71.1	91	65.2	49.3	216.6	314.3	495.4	196	100.1	289.2	170.2	217.3	253.2	198.2	246.1	146.6	4	921.776	9.03	0.00831	40.6384	7.779e-05	5.837e-07	5.05
1069	High	[K].LAEGYLSKPSDSEGSK.[T]	2xTMTpro [K8; K16]; 1xTMTpro [N-Term]	0.000133789	2	2	4	A0A6P6V2B4; A0A6P6VC95	A0A6P6V2B4 [244-259]; A0A6P6VC95 [244-259]	A0A6P6V2B4; A0A6P6VC95	0	2580.43	16	102.7	115.9	161.5	70.7	87	84.1	68.6	70.7	85.1	80.2	67.1	70.6	536.9	847.8	1260.4	576.2	347.4	867.1	573.4	630.8	792.6	456.2	662.1	549	3	860.822	6.83	0.00587	31.7976	7.779e-05	8.6e-09	4.1
1070	High	[K].LAEGFNGADLR.[N]	1xTMTpro [N-Term]	0.000133789	1	1	1	A0A6P6WAZ7	A0A6P6WAZ7 [340-350]	A0A6P6WAZ7	0	1466.79	11	80.6	99.5	98.8	103.9	61.9	127.4	124.5	129.6	132.3	87	141.7	115.6	74.4	128.5	136.1	149.3	43.6	231.7	183.6	204	217.4	87.3	246.6	158.5	2	733.906	8.17	0.00599	34.2091	7.779e-05	1.553e-05	3.36
1071	High	[KR].IAEGDKEDVDLAVK.[A]	2xTMTpro [K6; K14]; 1xTMTpro [N-Term]	0.000133789	1	3	4	A0A6P6X3R4	A0A6P6X3R4 [55-68]	A0A6P6X3R4; A0A6P6SH92; A0A6P6T3D3	1	2414.4	14	109.5	110.6	109.5	99.5	106.3	108.7	91.7	90.4	97.2	98.4	84.4	80	617.1	872.1	921.6	873.4	457.9	1208	826.7	869.7	975.5	603.4	897.8	670.4	2	1207.71	4.83	0.00583	35.1338	7.779e-05	1.297e-11	3.76
1072	High	[K].LAEETWGK.[H]	1xTMTpro [K8]; 1xTMTpro [N-Term]	0.000133789	1	2	2	A0A6P6W140	A0A6P6W140 [352-359]	A0A6P6W140; A0A6P6WHY3	0	1541.88	8	136.9	102.2	112.2	123.8	132.3	144.9	98	96.9	120	87.5	95.9	84.5	165.6	172.9	202.5	233.2	122.2	345.4	189.5	200	258.5	115.1	218.9	151.9	2	771.45	6.95	0.00536	34.6706	7.779e-05	0.0001607	2.9
1073	High	[K].IAEENTQNAVK.[V]	1xTMTpro [K11]; 1xTMTpro [N-Term]	0.000133789	2	2	1	A0A6P6VAP8; A0A6P6V5B4	A0A6P6VAP8 [822-832]; A0A6P6V5B4 [822-832]	A0A6P6VAP8; A0A6P6V5B4	0	1825.03	11	70.2	68.5	75.9	131.7	128	100	109.2	117.8	103.7	167.7	149.2	164.4	39.7	54.2	64.1	116	55.3	111.5	98.8	113.7	104.5	103.2	159.2	138.2	3	609.019	6.59	0.00401	20.6747	7.779e-05	0.0001464	2.93
1074	High	[K].LAEAESLVASIEQK.[S]	1xTMTpro [K14]; 1xTMTpro [N-Term]	0.000133789	1	4	1	A0A6P6TEM2	A0A6P6TEM2 [175-188]	A0A6P6TEM2; A0A6P6TDB7; A0A6P6TM40; A0A6P6TKR6	0	2096.21	14	107.9	126.2	119.8	95.7	83.5	108.5	106.9	106.5	107.9	90.4	103.4	104.3	65.6	107.4	108.7	90.6	38.8	130	103.9	110.5	116.8	59.8	118.6	94.3	3	699.413	6.93	0.00484	51.7646	7.779e-05	5.275e-06	3.79
1075	High	[K].LAEAEGLLEVLR.[N]	1xTMTpro [N-Term]	0.000133789	1	1	3	A0A6P6S6Q8	A0A6P6S6Q8 [729-740]	A0A6P6S6Q8	0	1616.95	12	66.4	95.3	87.9	100.4	33.9	114.6	134.1	154.1	143.3	99.1	168	188.5	39	78.3	77	91.8	15.2	132.6	125.9	154.3	149.8	63.3	186	164.5	2	808.987	7.65	0.00618	51.7571	7.779e-05	1.771e-07	3.72
1076	High	[R].IADTASQVK.[D]	1xTMTpro [K9]; 1xTMTpro [N-Term]	0.000133789	1	1	2	A0A6P6XLD6	A0A6P6XLD6 [185-193]	A0A6P6XLD6	0	1540.92	9	100.2	118.4	135.8	98.3	94.6	87.3	77.6	98.3	78.1	82.2	90.6	90.5	227	375.3	459.2	346.8	163.7	389.9	281.2	380	315.2	202.7	387.2	304.7	2	770.964	1.64	0.00126	21.0688	7.779e-05	6.797e-05	2.95
1077	High	[K].LADNGEGGVIIDSGTAVTR.[L]	1xTMTpro [N-Term]	0.000133789	1	2	1	A0A6P6VA66	A0A6P6VA66 [353-371]	A0A6P6VA66; A0A6P6V4Q1	0	2149.14	19	87	107.9	95.5	101.1	58.4	122.7	156.8	156.6	179.8	69	116.9	92	88.9	154.3	145.6	161	45.6	247.2	256.2	273	327.2	76.7	225.4	139.7	2	1075.08	3.02	0.00325	36.0061	7.779e-05	4.821e-12	4.57
1078	High	[K].LADLVGVTLGPK.[G]	1xTMTpro [K12]; 1xTMTpro [N-Term]	0.000133789	1	2	1	A0A6P6XDA4	A0A6P6XDA4 [87-98]	A0A6P6XDA4; A0A6P6XBB8	0	1791.12	12	70.3	79	79.7	105.4	171.5	117.7	89.3	93.8	110.2	155.4	109	116	22.7	35.7	38.4	53	42.3	74.9	46.1	51.7	63.4	54.6	66.4	55.7	3	597.718	8.09	0.00483	50.2717	7.779e-05	7.579e-07	3.38
1079	High	[R].LADLSGVQVK.[V]	1xTMTpro [K10]; 1xTMTpro [N-Term]	0.000133789	1	1	2	A0A6P6WR84	A0A6P6WR84 [99-108]	A0A6P6WR84	0	1638.01	10	104.8	132.1	145.6	84.7	103.6	61.8	100	74.2	71.7	65.1	105.5	93.9	246.1	434.2	510.3	309.9	185.8	286.3	375.5	297.5	299.8	166.3	467.6	327.7	3	546.678	6.17	0.00337	41.6057	7.779e-05	1.714e-05	2.71
1080	High	[K].LADIGIAMGIAGTEVAK.[E]	1xTMTpro [K17]; 1xTMTpro [N-Term]	0.000133789	1	3	1	A0A6P6UDU4	A0A6P6UDU4 [745-761]	A0A6P6T8R7; A0A6P6UDU4; A0A6P6W2F8	0	2238.3	17	121.7	114.2	116	106.1	104.5	110.9	108.5	107	116.1	109.3	108.3	105.8	116.8	153.4	166.2	158.6	76.6	209.7	166.5	175.2	198.5	114.1	196	151	3	746.774	2.85	0.00213	51.9878	7.779e-05	2.821e-06	3.03
1081	High	[K].LADLEAAPAAVAR.[L]	1xTMTpro [N-Term]	0.000133789	1	2	3	A0A6P6S900	A0A6P6S900 [562-574]	A0A6P6SC07; A0A6P6S900	0	1571.91	13	81.4	99.3	97.8	104.8	60.5	125	124.3	130.9	125.4	91.3	154.5	134	109.2	186.4	195.9	219	62	330.4	266.5	299.6	299.6	133.2	390.9	267.1	2	786.464	8.55	0.00672	39.7883	7.779e-05	1.743e-07	3.39
1082	High	[R].LADGPGAEEEESDKSR.[S]	1xTMTpro [K14]; 1xTMTpro [N-Term]	0.000133789	1	1	2	A0A6P6TJN5	A0A6P6TJN5 [111-126]	A0A6P6TJN5	1	2298.17	16	179.1	108.8	159.7	117.1	60.4	70.7	93.9	81	67.5	40.2	52.2	58	505.6	429.8	672.7	514.9	130.3	393.5	423.8	389.9	339.2	123.6	277.8	243.5	3	766.735	8.26	0.00633	16.7336	7.779e-05	1.448e-14	5.48
1083	High	[K].LADFFNIPGVYR.[V]	1xTMTpro [N-Term]	0.000133789	1	1	3	A0A6P6ULJ0	A0A6P6ULJ0 [385-396]	A0A6P6ULJ0	0	1715.94	12	84.3	118.4	120	130.7	46.7	140.1	129.3	129	123.7	72.9	148.1	127.4	88.7	174.3	188.4	214.1	37.5	290.5	217.5	231.6	231.7	83.4	294	199.2	2	858.481	6.12	0.00525	52.8483	7.779e-05	8.008e-06	3.15
1084	High	[R].LADCGIGFGR.[N]	1xCarbamidomethyl [C4]; 1xTMTpro [N-Term]	0.000133789	1	2	1	A0A6P6WWA5	A0A6P6WWA5 [123-132]	A0A6P6WMT1; A0A6P6WWA5	0	1369.72	10	56.3	70.2	64.8	94.4	72.1	104.2	101.8	95.1	102.8	81.1	115.8	117.7	58	101.3	99.7	151.5	56.8	211.7	167.8	167.2	188.7	91	225.1	180.4	2	685.37	8.64	0.00592	33.1473	7.779e-05	4.269e-05	3
1085	High	[R].LADCGIGFGK.[DN]	1xCarbamidomethyl [C4]; 1xTMTpro [K10]; 1xTMTpro [N-Term]	0.000133789	1	3	3	A0A6P6X5H3	A0A6P6X5H3 [121-130]	A0A6P6VG88; A0A6P6X5H3; A0A6P6XDU0	0	1645.92	10	40.4	51.2	47.2	109.6	114.8	130.9	153	161.3	167.9	138.9	132.6	134.7	75.7	134.4	132.2	320.2	164.5	484	458.8	516.2	560.8	283.4	469.1	375.5	2	823.472	8.78	0.00722	39.5032	7.779e-05	1.88e-06	3.56
1086	High	[K].LADAVGLTLGPR.[G]	1xTMTpro [N-Term]	0.000133789	2	2	2	A0A6P6VZV3; A0A6P6U5S5	A0A6P6VZV3 [70-81]; A0A6P6U5S5 [70-81]	A0A6P6VZV3; A0A6P6U5S5	0	1486.89	12	89.9	107.9	87.9	113.7	54.2	97.2	95.8	101.3	92.1	131.9	235.6	223	52.1	87.5	76.1	102.7	24	111.1	88.8	100.2	95.1	83.2	257.7	192.2	3	496.306	8.02	0.00398	45.3976	7.779e-05	0.0002381	3.15
1087	High	[K].IADAEENLGESEVR.[E]	1xTMTpro [N-Term]	0.000133789	1	1	2	A0A6P6X6D0	A0A6P6X6D0 [85-98]	A0A6P6X6D0	0	1835.93	14	87.8	112.8	113.2	105.2	64.9	106.9	109	109.1	114.7	64.8	109	96.2	298.9	537.8	575.7	557.9	168.8	717.9	593.5	634.1	695.7	240.2	700.7	487.1	2	918.477	8.37	0.00768	28.6072	7.779e-05	3.707e-09	4.44
1088	High	[K].IAEVGADIELIIK.[Q]	1xTMTpro [K13]; 1xTMTpro [N-Term]	0.000133789	1	2	2	A0A6P6WA44	A0A6P6WA44 [744-756]	A0A6P6WA44; A0A6P6WAR1	0	1992.22	13	83	102.5	91.2	113.7	180.1	111.4	93.4	84.4	78.1	131.5	95.7	85.8	46.3	80	75.9	98.7	76.7	122.4	83.3	80.3	77.6	79.8	100.7	71.1	3	664.752	8.68	0.00576	53.7781	7.779e-05	9.89e-07	2.76
1089	High	[K].LAAWIEEVNKIEAYK.[A]	2xTMTpro [K10; K15]; 1xTMTpro [N-Term]	0.000133789	1	3	3	A0A6P6UFS8	A0A6P6UFS8 [202-216]	A0A6P6UBC8; A0A6P6UFS8; A0A6P6UAI9	1	2689.57	15	109.1	103.8	107.5	93	119.3	104.7	84.4	79.7	92.7	107.5	91.6	77.6	359.8	478.6	528.9	477.4	300.3	680.5	445.1	448.1	544.4	385.7	569.8	380.4	3	897.201	4.77	0.00427	53.018	7.779e-05	1.3e-08	4.29
1090	High	[K].LAEVLGQSSEVIR.[A]	1xTMTpro [N-Term]	0.000133789	1	3	1	A0A6P6WST4	A0A6P6WST4 [199-211]	A0A6P6WST4; A0A6P6WQN9; A0A6P6X2X0	0	1704.98	13	101.6	118.6	103.7	83.9	101.1	77.3	87.5	86.2	87.4	134.4	84.7	113	68	111.1	103.6	87.5	51.7	102	93.6	98.4	104.2	97.9	107	112.4	3	569.001	3.92	0.00223	45.5448	7.779e-05	0.000171	2.56
1091	High	[K].LAFSSDNPLSYK.[V]	1xTMTpro [K12]; 1xTMTpro [N-Term]	0.000133789	1	1	1	A0A6P6UVG7	A0A6P6UVG7 [223-234]	A0A6P6UVG7	0	1950.08	12	113.5	105.9	117.2	96.6	121.4	122	88.1	107.2	103.7	99.5	105.1	87.3	43.8	57.2	67.5	58.1	35.8	92.8	54.4	70.6	71.3	41.8	76.5	50.1	3	650.705	9.64	0.00627	45.3313	7.779e-05	3.887e-05	3.39
1092	High	[K].LAMQEFMILPVGASSFK.[E]	2xOxidation [M3; M7]; 1xTMTpro [K17]; 1xTMTpro [N-Term]	0.000133789	1	1	1	A0A6P6T3Q6	A0A6P6T3Q6 [168-184]	A0A6P6T3Q6	0	2509.37	17	86.1	89.2	97	88.5	113.5	85.3	112.8	103.3	115.3	130.8	111.7	105.9	43	62.3	72.3	68.8	43.3	83.9	90.1	88	102.5	71.1	105.2	78.6	3	837.133	6.51	0.00545	49.548	7.779e-05	2.228e-07	4.77
1093	High	[K].LAMQEFMILPVGASSFK.[E]	1xOxidation [M]; 1xTMTpro [K17]; 1xTMTpro [N-Term]	0.000133789	1	1	2	A0A6P6T3Q6	A0A6P6T3Q6 [168-184]	A0A6P6T3Q6	0	2493.37	17	93.4	86.9	95.1	100.8	122.1	95.3	105.3	106.5	110.2	160.7	124	109.4	56.1	73	85.3	94.3	56	112.8	101.1	109.2	117.9	105	140.5	97.7	3	831.804	9.83	0.00817	51.6658	7.779e-05	1.38e-09	4.37
1094	High	[K].LALYDIAGTPGVAADVSHINTR.[S]	1xTMTpro [N-Term]	0.000133789	1	2	3	A0A6P6SFT8	A0A6P6SFT8 [67-88]	A0A6P6SFT8; A0A6P6S800	0	2558.39	22	98.6	107.8	104.1	106.2	97	106.1	105.7	103.9	109.1	109.3	126.5	121.4	202.4	309.8	318.9	339.7	152.1	429.4	347.1	364.1	398.8	244.1	490	370.5	3	853.471	3.98	0.00339	45.7265	7.779e-05	2.646e-17	5.39
1095	High	[R].LALVTGGEIASTFDNPESVK.[L]	1xTMTpro [K20]; 1xTMTpro [N-Term]	0.000133789	1	2	3	A0A6P6TW94	A0A6P6TW94 [318-337]	A0A6P6VRG9; A0A6P6TW94	0	2656.47	20	78.2	69.4	81.3	105	234.8	109.8	90.8	86.2	90.2	164.6	86.7	104.8	119.3	148.2	185.1	249.7	273.7	330.2	221.7	224.4	245.1	273.3	249.6	237.7	3	886.167	7.07	0.00626	49.791	7.779e-05	2.213e-10	4.63
1096	High	[K].IALVTGGDSGIGR.[A]	1xTMTpro [N-Term]	0.000133789	1	1	2	A0A6P6W0C7	A0A6P6W0C7 [97-109]	A0A6P6W0C7	0	1519.88	13	78.7	95.4	91.8	114.6	51.7	135.9	120.7	107.5	122.6	48.7	110.2	77.8	57	96.7	99.2	129.3	28.6	194	139.8	132.9	158.2	38.4	150.5	83.8	2	760.448	8.16	0.0062	37.5017	7.779e-05	4.094e-08	2.64
1097	High	[R].IALTDNSIIEQTLGK.[H]	1xTMTpro [K15]; 1xTMTpro [N-Term]	0.000133789	1	3	2	A0A6P6XC72	A0A6P6XC72 [162-176]	A0A6P6VF64; A0A6P6XC72; A0A6P6XG02	0	2224.3	15	75.3	92.7	85.2	93.5	119.7	91.1	77.2	72.7	68.9	97	80.2	92.1	114.1	196.6	192.7	220.8	138.6	272	187.1	187.9	186.1	160	229.2	207.6	3	742.114	10.87	0.00806	49.418	7.779e-05	8.061e-07	4.3
1098	High	[R].IALTDNSIIEQALGK.[H]	1xTMTpro [K15]; 1xTMTpro [N-Term]	0.000133789	1	1	1	A0A6P6X790	A0A6P6X790 [162-176]	A0A6P6X790	0	2194.29	15	65	70.8	73.5	128.3	176.6	133.4	79.1	84.1	92.9	138	113.8	118.1	45.1	68.7	76.1	138.6	93.5	182.3	87.7	99.5	114.7	104.1	148.8	121.7	3	732.108	7.32	0.00535	51.0754	7.779e-05	2.353e-07	4.21
1099	High	[K].LALSITTEQGK.[T]	1xTMTpro [K11]; 1xTMTpro [N-Term]	0.000133789	1	2	1	A0A6P6W0E5	A0A6P6W0E5 [122-132]	A0A6P6W0E5; A0A6P6VUE7	0	1769.07	11	114	92.8	102	127.8	154.8	131.8	121	115.9	117	101.2	103.3	108.1	50.9	58	68	88.9	52.8	116	86.4	88.3	93.1	49.2	87	71.8	3	590.366	9.78	0.00576	41.5167	7.779e-05	0.0002777	3.76
1100	High	[K].LAISETYQR.[T]	1xTMTpro [N-Term]	0.000133789	1	3	1	A0A6P6W405	A0A6P6W405 [160-168]	A0A6P6W405; A0A6P6W7L1; A0A6P6W408	0	1384.78	9	95.9	95.6	99.9	84.6	70	91.2	92.2	87.4	88.4	62.3	83.5	69.4	89.1	124.2	138.5	122.4	49.7	167	136.9	138.6	146.2	63	146.4	95.8	2	692.896	6.09	0.00422	27.515	7.779e-05	0.0002985	2.57
1101	High	[K].IALRDDPLDYVR.[E]	1xTMTpro [N-Term]	0.000133789	1	1	1	A0A6P6WLF8	A0A6P6WLF8 [374-385]	A0A6P6WLF8	1	1749.98	12	87.3	123.2	125.7	106.1	33.2	115.5	66.7	64.5	59.6	26.9	60.8	46	44.7	88.3	96.1	84.6	13	116.6	54.6	56.4	54.4	15	58.7	35	3	584.002	5.61	0.00327	42.84	7.779e-05	2.106e-05	3.49
1102	High	[R].IALQAGIDK.[L]	1xTMTpro [K9]; 1xTMTpro [N-Term]	0.000133789	2	2	2	A0A6P6VZV3; A0A6P6U5S5	A0A6P6VZV3 [61-69]; A0A6P6U5S5 [61-69]	A0A6P6VZV3; A0A6P6U5S5	0	1536.96	9	76.5	90.1	79.7	91.6	89	97.4	98.9	97.6	92.2	106.5	125.5	117.1	233.2	384.3	362.4	434.7	207.2	585.1	482	507.7	500.2	353.3	721.3	530.6	2	768.99	7.47	0.00574	37.3961	7.779e-05	2.031e-05	2.86
1103	High	[R].IALNKPGTDEDAITR.[V]	1xTMTpro [K5]; 1xTMTpro [N-Term]	0.000133789	1	2	1	A0A6P6VJY4	A0A6P6VJY4 [252-266]	A0A6P6VJY4; A0A6P6W5S0	0	2222.26	15	82	87.8	106.6	128	131	130.2	98.8	99.7	106.3	125.8	122	107.5	118.9	178	230.6	288.9	145	371.8	228.9	246.5	274.4	198.3	333.5	231.5	3	741.433	9.68	0.00717	30.2573	7.779e-05	3.779e-07	3.24
1104	High	[K].IAILDHEK.[K]	1xTMTpro [K8]; 1xTMTpro [N-Term]	0.000133789	1	3	1	A0A6P6SQB6	A0A6P6SQB6 [268-275]	A0A6P6SQB6; A0A6P6T007; A0A6P6SQ57	0	1546.94	8	111.3	91.6	112	97.2	110.8	101.2	101.2	101	105.5	110.6	123	114.5	123.2	141.9	185.1	167.7	93.7	220.8	179.2	190.8	208.1	133.2	256.9	188.5	3	516.324	7.27	0.00375	31.9618	7.779e-05	0.0002277	3.88
1105	High	[K].LALGTDVSFDTATGNFTK.[Y]	1xTMTpro [K18]; 1xTMTpro [N-Term]	0.000133789	1	1	4	A0A6P6VEM4	A0A6P6VEM4 [140-157]	A0A6P6VEM4	0	2466.34	18	102.8	108.1	108.4	95.3	100.4	100.8	90.8	102	92.7	95.9	98.1	99.8	466.2	685.8	734.2	673.7	347.9	901.1	658.6	789.6	748.8	473.4	839.4	673.2	3	822.791	8.94	0.00735	47.0276	7.779e-05	1.008e-09	4.69
1106	High	[R].LALGGQPYPVVFIK.[K]	1xTMTpro [K14]; 1xTMTpro [N-Term]	0.000133789	1	1	3	A0A6P6UMT9	A0A6P6UMT9 [189-202]	A0A6P6UMT9	0	2110.29	14	66.3	92.6	81.9	64.5	66.3	62.9	61.5	68.5	72	214.9	218.9	227.2	253.3	494.8	466.9	383.8	193.5	473.8	375.5	446.2	489.8	893.3	1577.2	1290	2	1055.66	5.8	0.00612	50.875	7.779e-05	4.096e-10	5.4
1107	High	[K].LALGADLSFDTATGNFTK.[Y]	1xTMTpro [K18]; 1xTMTpro [N-Term]	0.000133789	1	2	1	A0A6P6V898	A0A6P6V898 [140-157]	A0A6P6V898; A0A6P6V3F1	0	2450.34	18	96.9	90.3	102.5	96.4	101.3	93.9	78.9	99.6	80.9	95.4	87.9	114.9	434.1	566.4	685.4	673.1	346.6	829.2	565.3	761.5	645.8	465.2	743.3	765.1	2	1225.68	7.4	0.00907	49.225	7.779e-05	9.521e-15	5.83
1108	High	[R].IAIDMDPTTPNTFDNAYFQNLQQGK.[G]	1xOxidation [M5]; 1xTMTpro [K25]; 1xTMTpro [N-Term]	0.000133789	1	1	1	A0A6P6SLM2	A0A6P6SLM2 [241-265]	A0A6P6SLM2	0	3466.74	25	92.2	93.6	101.9	88.4	94.8	97.2	84.4	89	92.7	100.1	92	89.2	116.2	165	191.6	173.4	91.2	241.3	170.1	191.3	207.9	137.2	218.6	167.1	4	867.45	9.74	0.00844	47.1398	7.779e-05	6.324e-07	3.43
1109	High	[K].IAIAVDLSDESAYAVK.[W]	1xTMTpro [K16]; 1xTMTpro [N-Term]	0.000133789	1	3	1	A0A6P6WAL8	A0A6P6WAL8 [40-55]	A0A6P6WAL8; A0A6P6W9A8; A0A6P6W8K1	0	2273.29	16	107.4	95.1	103.8	106.5	115.1	107.6	88.8	97.6	103.2	125.1	89.8	107	73.1	90.5	105.4	112.8	59.8	144.2	96.6	113.3	125	92.6	115.2	108.2	3	758.442	10.31	0.00781	49.2362	7.779e-05	1.478e-07	3.76
1110	High	[R].LAHLYEVGEDKDLSVPAR.[V]	1xTMTpro [K11]; 1xTMTpro [N-Term]	0.000133789	1	2	3	A0A6P6X5T5	A0A6P6X5T5 [930-947]	A0A6P6X5T5; A0A6P6X541	1	2620.46	18	115.4	100.4	123.2	96.2	107.1	103.8	95.8	84.3	114.1	114.1	92.6	94.7	290.5	353.6	462.8	377.1	205.9	514.8	385.6	362.3	511.7	312.7	439.9	354.3	3	874.162	4.73	0.00413	39.3885	7.779e-05	3.523e-16	5.16
1111	High	[R].LAHLYETGEDRDYSVMEK.[V]	1xTMTpro [K18]; 1xTMTpro [N-Term]	0.000133789	1	1	1	A0A6P6VHB4	A0A6P6VHB4 [941-958]	A0A6P6VHB4	1	2764.41	18	106.8	75.1	101.6	91.4	143.4	105.8	94	87.8	108.6	136.2	88.1	86.4	84.2	82.9	119.6	112.3	86.4	164.5	118.5	118.2	152.5	116.9	131	101.3	4	691.861	3.72	0.00257	34.5178	7.779e-05	4.787e-05	3.31
1112	High	[R].IAGNEGSGGLDR.[E]	1xTMTpro [N-Term]	0.000133789	1	2	1	A0A6P6TAJ1	A0A6P6TAJ1 [604-615]	A0A6P6TAJ1; A0A6P6TP93	0	1449.76	12	104.6	161.5	121.5	103.6	40.9	118	145.1	155.7	143.2	53.5	159.3	132.3	119.9	259	208	185	35.8	266.6	266	304.6	292.3	66.7	344.6	225.4	2	725.385	1.4	0.00102	16.4819	7.779e-05	8.934e-07	3.4
1113	High	[R].LAGLPEEDFR.[S]	1xTMTpro [N-Term]	0.000133789	1	1	1	A0A6P6TDP9	A0A6P6TDP9 [410-419]	A0A6P6TDP9	0	1450.79	10	106.3	110.1	114.4	92.5	68.3	96.6	88.1	92.3	90	65.1	93.4	90.7	177.4	257.1	284.9	240.4	87	317.7	235	262.8	267.4	118.2	294	224.9	2	725.904	9.73	0.00705	39.2316	7.779e-05	9.854e-05	3.5
1114	High	[K].LAGESESNLRK.[A]	1xTMTpro [K11]; 1xTMTpro [N-Term]	0.000133789	2	4	1	A0A6P6VXL4; A0A6P6XB75	A0A6P6VXL4 [282-292]; A0A6P6XB75 [289-299]	A0A6P6VXL4; A0A6P6XB75; A0A6P6XFA9; A0A6P6U5U2	1	1812.05	11	98.4	102.6	77.5	126.4	114.1	121	139.3	160.2	118	102.9	116.4	113.9	111.2	162.2	130.6	222.4	98.4	269.3	251.6	308.8	237.3	126.5	248.1	191.3	3	604.691	5.93	0.00358	18.0335	7.779e-05	1.787e-05	3
1115	High	[K].LAGESESNLR.[K]	1xTMTpro [N-Term]	0.000133789	2	4	1	A0A6P6VXL4; A0A6P6XB75	A0A6P6VXL4 [282-291]; A0A6P6XB75 [289-298]	A0A6P6VXL4; A0A6P6XB75; A0A6P6XFA9; A0A6P6U5U2	0	1379.74	10	87.9	104.8	87.2	114.6	58.1	118.7	122.2	132.6	118.6	68.5	127.7	112.4	115.8	193.2	171.4	235	58.4	308	257.4	298.1	278.1	98.1	317.4	220	2	690.377	1.11	0.00077	17.792	7.779e-05	2.668e-06	3.42
1116	High	[R].LAGEANDYVGK.[G]	1xTMTpro [K11]; 1xTMTpro [N-Term]	0.000133789	1	2	2	A0A6P6SSD5	A0A6P6SSD5 [1429-1439]	A0A6P6T1G5; A0A6P6SSD5	0	1744.97	11	103.3	107.8	107.6	93.2	97.9	95.7	89.1	92	94.1	91.4	87.4	78.9	117.8	172	183.2	165.6	85.3	215.1	162.4	179.1	191.2	113.4	188.1	133.8	2	872.994	5.14	0.00449	29.6556	7.779e-05	9.265e-05	1.63
1117	High	[K].IAGDVGDHPDNNYNPNALPVVK.[D]	1xTMTpro [K22]; 1xTMTpro [N-Term]	0.000133789	1	1	1	A0A6P6TS52	A0A6P6TS52 [346-367]	A0A6P6TS52	0	2927.55	22	79	86.6	82.1	84.2	93.1	86.3	83.5	91.9	91.4	88.8	84.8	84.4	134.8	206.7	209	223.7	121.3	290.3	227.7	267.6	277.9	164.9	272.9	214.1	4	732.649	8.25	0.00604	37.2674	7.779e-05	3.246e-05	3.55
1118	High	[R].IAFVEFPGVYVVNSDGSGLR.[K]	1xTMTpro [N-Term]	0.000133789	1	2	1	A0A6P6UWU1	A0A6P6UWU1 [435-454]	A0A6P6UWU1; A0A6P6UKE0	0	2430.3	20	169	110.2	118.3	82.9	96.7	91.9	108.8	110.7	103.2	101.2	99.9	127.8	65.2	59.5	68.1	49.8	28.5	69.9	67.1	72.9	70.9	42.5	72.7	73.3	3	810.778	7.9	0.0064	52.3005	7.779e-05	6.279e-09	4.37
1119	High	[K].LAFTGSTDTGK.[I]	1xTMTpro [K11]; 1xTMTpro [N-Term]	0.000133789	2	2	1	A0A6P6XFH3; A0A6P6X673	A0A6P6XFH3 [274-284]; A0A6P6X673 [274-284]	A0A6P6XFH3; A0A6P6X673	0	1705.96	11	107.6	99.5	103.7	83.6	96.6	91.2	80.6	77.8	82.7	74.8	72.7	84.4	141.3	182.8	203.3	171	96.9	236.1	169.3	174.4	193.5	106.9	180	164.8	2	853.491	7.93	0.00676	32.6987	7.779e-05	8.427e-09	3.85
1120	High	[K].IAFTGSSATGSK.[I]	1xTMTpro [K12]; 1xTMTpro [N-Term]	0.000133789	1	2	1	A0A6P6XAR1	A0A6P6XAR1 [234-245]	A0A6P6XAR1; A0A6P6X8E6	0	1734.99	12	78.3	90.2	77.5	111.6	139.4	99	96.1	94.6	98.6	119.1	106.8	107.4	124.4	200.3	183.6	276.1	169.1	309.9	244	256.2	278.8	205.8	320	253.4	3	579.007	9.72	0.00562	31.0339	7.779e-05	0.0002398	2.74
1121	High	[R].IAFGNREEIR.[Q]	1xTMTpro [N-Term]	0.000133789	1	2	1	A0A6P6U2Y7	A0A6P6U2Y7 [12-21]	A0A6P6U2Y7; S4NV24	1	1508.85	10	95.9	131.4	133.7	95	47	92.1	80	94.4	74.8	46.7	109	79.3	113.2	217.1	235.7	174.8	42.4	214.3	151.1	190.2	157.2	60	242.9	139.1	2	754.936	9.59	0.00724	18.3064	7.779e-05	0.0003908	3.22
1122	High	[R].LANANNHGILAPANGAAGPDNGAEQYR.[A]	1xTMTpro [N-Term]	0.000133789	1	1	1	A0A6P6SR39	A0A6P6SR39 [279-305]	A0A6P6SR39	0	2980.49	27	113.6	132	123.5	93.7	85.3	106.3	112.3	109.1	103.9	91.1	109	92.1	117.5	191	190.6	150.9	67.4	216.7	185.6	192.5	191.3	102.5	212.7	141.5	4	745.887	10.34	0.00771	25.7658	7.779e-05	7.13e-07	4.78
1123	High	[K].IAAVPSNVVVLTPENFDEIVLDEKK.[D]	2xTMTpro [K24; K25]; 1xTMTpro [N-Term]	0.000133789	2	2	1	A0A6P6VXS4; A0A6P6WJT8	A0A6P6VXS4 [138-162]; A0A6P6WJT8 [138-162]	A0A6P6VXS4; A0A6P6WJT8	1	3652.1	25	94.7	80.1	95.4	113.8	152.6	117.9	87.3	98.4	100.5	152	97.7	111.6	97.5	115.4	146.7	182.6	120	239.3	143.7	172.9	184.3	170.3	189.9	170.9	4	913.79	9.29	0.00848	51.9399	7.779e-05	1.048e-13	4.43
1124	High	[R].LAASSASITEVAPDAFGR.[E]	1xTMTpro [N-Term]	0.000133789	2	2	1	A0A6P6XGC1; A0A6P6X732	A0A6P6XGC1 [258-275]; A0A6P6X732 [258-275]	A0A6P6XGC1; A0A6P6X732	0	2067.1	18	101.6	132	112	97.4	78.4	112.6	123.7	131.5	109.5	91.2	112.7	95	30.2	54.9	49.7	45.1	17.8	66	58.8	66.7	58	29.5	63.2	42	3	689.713	9.31	0.00641	43.8937	7.779e-05	1.112e-08	5.69
1125	High	[K].HTGQEYAR.[K]	1xTMTpro [N-Term]	0.000133789	1	1	1	A0A6P6SYS9	A0A6P6SYS9 [74-81]	A0A6P6SYS9	0	1265.66	8																									3	422.559	6.42	0.00271	7.8601	7.779e-05	0.0003193	3
1126	High	[R].HTAVIDQQR.[V]	1xTMTpro [N-Term]	0.000133789	1	1	1	A0A6P6W0I2	A0A6P6W0I2 [534-542]	A0A6P6W0I2	0	1371.77	9																									3	457.928	2.99	0.00137	10.712	7.779e-05	0.0002316	2.87
1127	High	[K].HTANSTGIEGR.[I]	1xTMTpro [N-Term]	0.000133789	1	2	1	A0A6P6SYB0	A0A6P6SYB0 [156-166]	A0A6P6SYB0; A0A6P6SYV2	0	1446.76	11																									3	482.925	-1.94	-0.00093	8.2984	7.779e-05	0.0004047	2.75
1128	High	[R].HTAADLLEYANPK.[G]	1xTMTpro [K13]; 1xTMTpro [N-Term]	0.000133789	1	1	1	A0A6P6U277	A0A6P6U277 [212-224]	A0A6P6U277	0	2051.14	13	122.3	115.4	121.4	134.5	171.4	134	103.2	91.8	94.2	93.5	79.9	63.3	52.8	69.7	78.2	90.4	56.5	114	71.2	67.6	72.4	43.9	65.1	40.6	3	684.392	10.11	0.00691	36.8319	7.779e-05	5.874e-07	3.06
1129	High	[K].HSPPPAPATTK.[D]	1xTMTpro [K11]; 1xTMTpro [N-Term]	0.000133789	1	1	1	A0A6P6VR24	A0A6P6VR24 [263-273]	A0A6P6VR24	0	1712	11	66.4	57.9	60.1	69.3	88.4	61.4	81.7	68.5	75.4	98.7	63.9	77.1	23.7	28.9	32	38.5	24.1	43.2	46.6	41.7	47.9	38.3	43	40.9	3	571.341	5.29	0.00302	12.2143	7.779e-05	5.128e-06	4
1130	High	[K].HSIGATQPVQLIPYNPDVLDESILWTESR.[D]	1xTMTpro [N-Term]	0.000133789	1	2	2	A0A6P6SZR7	A0A6P6SZR7 [193-221]	A0A6P6SZR7; A0A6P6SQ02	0	3582.88	29	105.6	119.3	92.9	91.2	120.5	117.9	96.9	95.2	96.7	100.7	90.4	85.3	117.7	186.1	154.6	158.3	102.6	259	172.8	181	191.9	122.1	190.1	141.4	4	896.483	9.89	0.00886	51.1925	7.779e-05	5.751e-11	7.38
1131	High	[R].HSGMAVAGLAADGR.[Q]	1xOxidation [M4]; 1xTMTpro [N-Term]	0.000133789	1	2	2	A0A6P6T0X5	A0A6P6T0X5 [73-86]	A0A6P6T0X5; A0A6P6T2J4	0	1632.84	14	75	92.1	76.1	152.7	196.9	116.3	114.3	109.6	114.5	101.6	105.6	94.1	124.9	214.4	189	395.8	250.3	381.6	304.2	311.3	339.3	184	331.5	232.7	3	544.957	7.14	0.00388	12.6821	7.779e-05	1.455e-06	3.19
1132	High	[K].HQYLPEDLQVQQTPFR.[S]	1xTMTpro [N-Term]	0.000133789	1	2	1	A0A6P6TVM6	A0A6P6TVM6 [76-91]	A0A6P6U5D5; A0A6P6TVM6	0	2303.21	16	77.3	93.1	98	80.4	91.5	89.6	81.4	78.1	85.4	79.5	94.8	76.8	81.8	137.9	154.8	132.6	74	186.9	137.7	141.1	160.9	91.6	189.2	120.9	3	768.41	2.82	0.00216	36.1169	7.779e-05	2.606e-09	4.91
1133	High	[K].HQYDWDAATSANFLR.[K]	1xTMTpro [N-Term]	0.000133789	1	2	1	A0A6P6SLN3	A0A6P6SLN3 [283-297]	A0A6P6SLN3; A0A6P6T3H8	0	2099.03	15	86.9	106.8	100.4	82.7	57.2	98.1	93.3	92	113.5	67.3	95	79.2	51.3	88.2	88.5	76	25.8	114.1	88.1	92.7	119.3	43.2	105.8	69.5	3	700.353	8.99	0.00629	36.7423	7.779e-05	9.816e-10	4.86
1134	High	[K].HQIDEIVLVGGSTR.[I]	1xTMTpro [N-Term]	0.000133789	2	3	1	A0A6P6TVI9; A0A6P6W685	A0A6P6TVI9 [361-374]; A0A6P6W685 [405-418]	A0A6P6TVI9; A0A6P6W685; A0A6P6VNL7	0	1828.02	14	108.7	104.6	149.6	113.9	172	132.7	108.5	96	105	111.8	104.7	111	16.8	22.6	34.5	27.4	20.3	40.4	26.8	25.3	28.9	18.8	30.5	25.5	3	610.018	8.03	0.0049	31.8941	7.779e-05	2.08e-08	4.22
1135	High	[K].HQEIDGPTVER.[D]	1xTMTpro [N-Term]	0.000133789	1	1	1	A0A6P6WE62	A0A6P6WE62 [156-166]	A0A6P6WE62	0	1584.83	11	108	95.2	77.1	113.5	92.5	91.2	112.9	118.2	83.7	64.6	94.5	137.8	67.3	83	71.7	110.1	44	112	112.4	125.6	92.8	43.8	111.1	127.6	3	528.952	7.09	0.00375	12.4633	7.779e-05	2.711e-06	3.28
1136	High	[K].HPIGADQLDR.[AV]	1xTMTpro [N-Term]	0.000133789	1	5	4	A0A6P6TWX9	A0A6P6TWX9 [98-107]	A0A6P6TWX9; A0A6P6TUY7; A0A6P6U3J5; A0A6P6U4K5; A0A6P6TSS6	0	1425.78	10	115.2	121.1	162.6	101.2	47.7	95.8	94.6	115.4	92.5	60.9	108.2	110.2	161	236.8	339.3	220.4	50.9	264.1	211.5	275.4	230.4	92.7	285.3	229.1	3	475.933	4.46	0.00212	13.7323	7.779e-05	6.534e-05	2.91
1137	High	[K].HPIETTQENVK.[E]	1xTMTpro [K11]; 1xTMTpro [N-Term]	0.000133789	1	2	1	A0A6P6VJG7	A0A6P6VJG7 [366-376]	A0A6P6VJG7; A0A6P6T7Y5	0	1904.07	11	89.4	76.2	73	80	76.5	69.8	82.7	90.8	80.8	64.7	70	70.6	67.9	81	82.7	94.6	44.4	104.5	100.4	117.6	109.3	53.5	100.3	79.7	3	635.367	7.2	0.00457	14.3486	7.779e-05	8.964e-05	2.52
1138	High	[K].HPEIDVPNLQVIK.[L]	1xTMTpro [K13]; 1xTMTpro [N-Term]	0.000133789	1	3	1	A0A6P6VLW5	A0A6P6VLW5 [32-44]	A0A6P6VLW5; A0A6P6XGK5; A0A6P6S9T4	0	2110.25	13																									3	704.092	4.81	0.00339	42.945	7.779e-05	5.215e-06	3.33
1139	High	[K].HPEFIANTK.[L]	1xTMTpro [K9]; 1xTMTpro [N-Term]	0.000133789	1	3	1	A0A6P6W405	A0A6P6W405 [151-159]	A0A6P6W405; A0A6P6W7L1; A0A6P6W408	0	1664.96	9	91.7	98.1	102.3	108	110.2	107.2	108.2	94.5	100.6	101.6	105.9	110.6	40.2	60.2	67	73.8	36.9	92.7	75.9	70.7	78.6	48.5	87.6	72.1	3	555.663	7.01	0.00389	20.9731	7.779e-05	0.0002214	2.83
1140	High	[R].HPAESTNATNESVLK.[V]	1xTMTpro [K15]; 1xTMTpro [N-Term]	0.000133789	2	2	1	A0A6P6SXX4; A0A6P6W8N8	A0A6P6SXX4 [476-490]; A0A6P6W8N8 [476-490]	A0A6P6SXX4; A0A6P6W8N8	0	2206.2	15	81.7	64.7	65.7	95.3	206.5	80.8	80.7	83.3	83	302.2	80.3	131.8	70.9	78.5	85.1	128.8	136.8	138.2	111.9	123.3	128.3	285.3	131.4	170	3	736.075	7.18	0.00528	15.8609	7.779e-05	1.037e-09	4.35
1141	High	[K].HNPLLPEDPYER.[AV]	1xTMTpro [N-Term]	0.000133789	1	4	2	A0A6P6UHJ8	A0A6P6UHJ8 [81-92]	A0A6P6UHJ8; A0A6P6UUY5; A0A6P6UVX5; A0A6P6UGF3	0	1783.93	12	104.6	108.4	120.3	91.4	113.3	112.8	117.5	120.5	110.4	92	125.5	112	42.4	61.5	72.8	57.7	35.1	90.1	76.2	83.4	79.7	40.6	96	67.5	3	595.318	5.49	0.00327	25.5866	7.779e-05	2.439e-05	3.64
1142	High	[K].HNDDKQYVWESNADGAFAISEDVWNEPLGR.[G]	1xTMTpro [K5]; 1xTMTpro [N-Term]	0.000133789	1	1	1	A0A6P6UQ38	A0A6P6UQ38 [216-245]	A0A6P6UQ38	1	4070.98	30	115	101.4	104.6	92.4	134.4	146.5	78.4	82.8	90.1	113.5	76.2	59.2	269.7	332.8	366	337.6	240.8	677	293.9	331.4	376.2	289.7	337.1	206.5	4	1018.51	6.3	0.00641	46.1222	7.779e-05	3.742e-17	7.62
1143	High	[K].HNDDEQYVWESQAGGSFTVTR.[D]	1xTMTpro [N-Term]	0.000133789	2	3	3	A0A6P6S512; A0A6P6TUN9	A0A6P6S512 [141-161]; A0A6P6TUN9 [147-167]	A0A6P6S512; A0A6P6TUN9; A0A6P6S4G6	0	2730.27	21	87.9	78.3	40.2	167.7	73.7	182.1	197.1	152.6	100.5	73.6	130	120.7	48.9	60.9	33.4	145.2	31.3	199.5	175.2	144.8	99.5	44.5	136.4	99.8	3	910.774	12.82	0.01166	32.0435	7.779e-05	3.413e-12	5.27
1144	High	[R].HLTGEFEK.[K]	1xTMTpro [K8]; 1xTMTpro [N-Term]	0.000133789	1	3	2	A0A6P6SQ71	A0A6P6SQ71 [33-40]	A0A6P6SQ71; A0A6P6TRT9; A0A6P6T0E4	0	1568.89	8	79.3	80.7	77.6	93.5	219.9	81.4	81.8	80.8	80.3	173.1	73	86.7	204.1	290.7	298.1	375	432.4	413.1	336.9	354.9	368.4	484.8	354.3	331.9	3	523.639	5.98	0.00313	22.7024	7.779e-05	3.371e-05	3.72
1145	High	[R].HLQAANEDQR.[R]	1xTMTpro [N-Term]	0.000133789	1	1	1	A0A6P6XH47	A0A6P6XH47 [458-467]	A0A6P6XH47	0	1485.77	10	107.1	138.8	136.2	117.6	47.2	104.6	149	139.1	161.9	48.8	145.4	156.2	10.7	19.4	20.3	18.3	3.6	20.6	23.8	23.7	28.8	5.3	27.4	23.2	3	495.931	4.09	0.00203	9.4779	7.779e-05	1.912e-05	3.26
1146	High	[R].HLNSPEPVYPR.[L]	1xTMTpro [N-Term]	0.000133789	1	2	2	A0A6P6W5R2	A0A6P6W5R2 [276-286]	A0A6P6W5R2; J7FPQ8	0	1612.88	11	127.2	125	110.2	102.3	78.8	96.3	121	113.5	113.4	76	93.2	93.9	246.9	339.5	319.3	309.4	116.8	368.4	375.7	376	392.1	160.5	341.3	271	3	538.301	7.58	0.00408	17.0479	7.779e-05	1.157e-06	3.67
1147	High	[R].HLLGITEEER.[Q]	1xTMTpro [N-Term]	0.000133789	1	2	1	A0A6P6VSB3	A0A6P6VSB3 [1011-1020]	A0A6P6VSB3; A0A6P6WB48	0	1500.83	10	98.5	105.8	98.2	93.7	73.8	94.1	112.2	107.9	102.4	76.4	121.8	103.4	27.6	41.5	41.1	40.9	15.8	52	50.3	51.6	51.1	23.3	64.4	43.1	3	500.953	6.76	0.00338	23.4487	7.779e-05	0.0001898	3.03
1148	High	[R].HLIGDHVVYDIDVR.[L]	1xTMTpro [N-Term]	0.000133789	2	3	1	A0A6P6SFQ9; A0A6P6S7R6	A0A6P6SFQ9 [257-270]; A0A6P6S7R6 [257-270]	A0A6P6SFQ9; A0A6P6S7R6; A0A6P6SHH8	0	1955.07	14	112.2	105.1	116.4	86.9	77.9	103.5	115.4	100.2	95.5	80.4	103.6	95.4	36.4	47.7	56.4	43.9	19.3	66.2	59.9	55.5	55.2	28.4	63.4	46	4	489.525	5.09	0.00249	32.1993	7.779e-05	3.665e-06	4.13
1149	High	[K].HLIEQGATPLGQFNK.[E]	1xTMTpro [K15]; 1xTMTpro [N-Term]	0.000133789	1	1	1	A0A6P6SZS3	A0A6P6SZS3 [145-159]	A0A6P6SZS3	0	2261.29	15																									3	754.44	7.58	0.00572	36.298	7.779e-05	2.146e-08	4.66
1150	High	[K].HLLEIGMEGFYGDTKPEK.[K]	2xTMTpro [K15; K18]; 1xTMTpro [N-Term]	0.000133789	1	3	1	A0A6P6UJU7	A0A6P6UJU7 [244-261]	A0A6P6UJU7; A0A6P6VHU9; A0A6P6UT33	0	2976.63	18	82.5	89.2	89.9	99.3	102.4	102.9	98.2	99.8	102.9	101.1	89.5	84.8	129.5	196.1	210.8	243	122.8	318.6	246.5	267.4	287.7	172.7	265.2	198	4	744.919	7.59	0.00565	44.1097	7.779e-05	0.0001178	2.77
1151	High	[R].HLKDEVAATRDEEL.[-]	1xTMTpro [K3]; 1xTMTpro [N-Term]	0.000133789	2	3	2	A0A6P6WVA0; A0A6P6X4N6	A0A6P6WVA0 [233-246]; A0A6P6X4N6 [216-229]	A0A6P6WVA0; A0A6P6X4N6; A0A6P6WPR8	2	2234.23	14	110	101.9	97.6	90.6	94.4	99.7	86.5	89.5	86	78.3	84.6	73.7	255.6	331.3	338.6	327.8	167.6	456.7	321.4	354.8	356	198.1	371.1	254.7	4	559.314	2.28	0.00127	17.7078	7.779e-05	0.0001695	3.12
1152	High	[R].HLKDEVAATR.[D]	1xTMTpro [K3]; 1xTMTpro [N-Term]	0.000133789	2	3	2	A0A6P6WVA0; A0A6P6X4N6	A0A6P6WVA0 [233-242]; A0A6P6X4N6 [216-225]	A0A6P6WVA0; A0A6P6X4N6; A0A6P6WPR8	1	1748.03	10	128.7	86.6	108.2	142.9	154.6	160.3	65.1	74.6	80.2	112.1	80.9	111.3	95.8	90.2	120.2	165.7	87.9	235.2	77.5	94.8	106.3	90.8	113.7	123.2	3	583.351	4.47	0.00261	13.7043	7.779e-05	0.0001131	2.38
1153	High	[K].HIGGSDDTVEAYESGELAK.[L]	1xTMTpro [K19]; 1xTMTpro [N-Term]	0.000133789	1	1	1	A0A6P6SMJ7	A0A6P6SMJ7 [120-138]	A0A6P6SMJ7	0	2586.32	19	119	72.6	85	87.9	225.6	80.9	69.7	77.2	83.5	189.8	74.8	102.6	182.3	155.7	194.5	209.9	264.1	244.2	170.7	201.8	227.9	316.5	216.2	233.8	3	862.787	10.74	0.00926	29.914	7.779e-05	2.899e-14	5.28
1154	High	[R].HTGVMVGMGQK.[D]	1xOxidation [M5]; 1xTMTpro [K11]; 1xTMTpro [N-Term]	0.000133789	4	7	1	A0A6P6URY4; A0A6P6VPI2; A0A6P6SXD5; A0A6P6TGY8	A0A6P6URY4 [42-52]; A0A6P6VPI2 [42-52]; A0A6P6SXD5 [42-52]; A0A6P6TGY8 [42-52]	A0A6P6W3P9; A0A6P6URY4; A0A6P6SJG1; A0A6P6VPI2; A0A6P6SXD5; A0A6P6UK92; A0A6P6TGY8	0	1768.97	11	78.9	103.9	94.7	91.3	98.5	110.6	103	128.5	112.8	126.1	115	121	17.2	31.7	30.8	31	16.4	47.5	35.9	47.8	43.8	29.9	47.3	39.2	3	590.332	7.61	0.00449	16.4292	7.779e-05	0.0001176	3.63
1155	High	[K].IAAVFVEPIQGEGGIYSATK.[E]	1xTMTpro [K20]; 1xTMTpro [N-Term]	0.000133789	1	2	1	A0A6P6X3S1	A0A6P6X3S1 [238-257]	A0A6P6X3S1; A0A6P6V7W2	0	2658.5	20	91.1	98.8	88.6	95.9	94.6	95.9	90.8	93.7	92.6	98.3	96.2	101.6	133.6	202.6	194	219	105.9	277.1	213	234.5	241.7	156.8	266.2	221.5	3	886.846	8.34	0.00739	49.5892	7.779e-05	0.0001492	2.63
1156	High	[K].HTTGDEMGGHAVK.[L]	1xOxidation [M7]; 1xTMTpro [K13]; 1xTMTpro [N-Term]	0.000133789	2	2	4	A0A6P6VWH0; A0A6P6WE54	A0A6P6VWH0 [272-284]; A0A6P6WE54 [272-284]	A0A6P6VWH0; A0A6P6WE54	0	1964.02	13	122	78.7	69.1	71.9	278.6	54	92	94.6	75.6	203.5	67.8	80.4	178.5	161.1	150.9	163.8	311.3	155.7	215.3	236.1	196.9	324	187.2	174.8	4	491.762	5.55	0.00272	9.6393	7.779e-05	6.188e-08	3.11
1157	High	[R].HVDTAAEYGVQEEVGLAINR.[A]	1xTMTpro [N-Term]	0.000133789	1	2	7	A0A6P6SXS1	A0A6P6SXS1 [53-72]	A0A6P6SXS1; A0A6P6SL92	0	2475.28	20	103.3	120.9	115.6	94.3	80.5	112.3	111	100.7	111.9	74.1	97	77.8	428.6	701.9	715.6	609.5	255	918.6	736.4	713	827	334.4	759.3	479.7	3	825.766	1.36	0.00112	37.1338	7.779e-05	1.199e-16	6.95
1158	High	[R].IAALPDSDSR.[S]	1xTMTpro [N-Term]	0.000133789	1	2	1	A0A6P6TGP2	A0A6P6TGP2 [254-263]	A0A6P6T9M0; A0A6P6TGP2	0	1348.74	10	116.9	151.5	158.1	100.3	41.3	95.4	116.4	124.8	109.2	63.5	138.5	130.5	64.5	116.9	130.2	86.2	17.4	103.7	102.7	117.5	107.3	38.1	144.1	107	2	674.878	6.81	0.00459	25.3974	7.779e-05	0.0001027	2.74
1159	High	[K].LAAIAYSK.[K]	1xTMTpro [K8]; 1xTMTpro [N-Term]	0.000133789	3	3	2	A0A6P6WJH1; A0A6P6VYK5; A0A6P6VV49	A0A6P6WJH1 [277-284]; A0A6P6VYK5 [277-284]; A0A6P6VV49 [277-284]	A0A6P6WJH1; A0A6P6VYK5; A0A6P6VV49	0	1444.9	8	65.3	83.1	66.8	74.8	61	86	75.2	82	81.7	130.2	196.3	212.3	101.7	181.1	155.4	181.6	72.6	264	187.4	218	226.6	220.8	576.9	491.8	2	722.96	7.42	0.00536	38.8205	7.779e-05	0.0004276	3.89
1160	High	[R].LAAGIGYPVMIK.[A]	1xOxidation [M10]; 1xTMTpro [K12]; 1xTMTpro [N-Term]	0.000133789	2	3	1	A0A6P6VBE4; A0A6P6V544	A0A6P6VBE4 [218-229]; A0A6P6V544 [218-229]	A0A6P6VBE4; A0A6P6V544; A0A6P6V2T8	0	1857.12	12	85.5	96.5	96.8	102.2	98.3	102.1	102.8	105.6	99.3	129.3	126.1	113	36.2	57.2	61.2	67.4	31.8	85.2	69.6	76.3	74.9	59.6	100.7	71.1	3	619.715	7.44	0.0046	45.6407	7.779e-05	1.821e-05	3.05
1161	High	[R].LAAGEPDFDTPAVIAEAGINAIR.[E]	1xTMTpro [N-Term]	0.000133789	1	3	1	A0A6P6TCB7	A0A6P6TCB7 [39-61]	A0A6P6TCB7; A0A6P6TLB8; A0A6P6TCE5	0	2615.4	23	95.8	103.1	94.1	95.1	72.7	89.6	118	107.1	106.5	130	155.2	141.1	47.1	70.9	69	72.8	27.3	86.8	92.7	89.8	93.2	69.5	143.9	103.1	3	872.482	12.37	0.01078	52.2791	7.779e-05	1.881e-09	5.35
1162	High	[K].LAADTPLLTGQR.[V]	1xTMTpro [N-Term]	0.000133789	1	2	1	A0A6P6XGH8	A0A6P6XGH8 [223-234]	A0A6P6XGH8; A0A6P6X9K0	0	1559.91	12	93.2	102.8	104.1	123.7	68.5	131.6	119.2	116.3	123.5	84.4	141.4	139.5	85.9	132.6	143.2	177.6	48.2	239.1	175.7	183	202.8	84.7	245.9	191.1	2	780.466	11.12	0.00868	37.7705	7.779e-05	5.023e-06	3.43
1163	High	[R].LAADPVPNYTFGCIQK.[A]	1xCarbamidomethyl [C13]; 1xTMTpro [K16]; 1xTMTpro [N-Term]	0.000133789	2	2	3	A0A6P6WG65; A0A6P6VXC7	A0A6P6WG65 [195-210]; A0A6P6VXC7 [195-210]	A0A6P6WG65; A0A6P6VXC7	0	2402.3	16	85.9	97.9	105	88.3	90.5	92	86.8	89.3	89.1	121.9	113.7	120.9	569.9	908	1039.1	912.2	458.3	1202.1	920.1	1010.4	1051.7	879.4	1423	1191.9	2	1201.67	8.19	0.00984	45.386	7.779e-05	2.198e-09	5.47
1164	High	[R].LAADLGDNVPTLPK.[G]	1xTMTpro [K14]; 1xTMTpro [N-Term]	0.000133789	1	2	2	A0A6P6UPC4	A0A6P6UPC4 [776-789]	A0A6P6UPC4; A0A6P6URT7	0	2032.19	14	85.2	85.5	85.3	121.5	159.7	119.6	93.5	95.9	98.9	137	102.4	116.8	65.4	91.9	97.8	145.3	93.7	181	114.8	125.7	135.2	114.5	148.4	133.3	3	678.076	9.3	0.0063	45.4285	7.779e-05	5.875e-07	3.95
1165	High	[K].LAADAVAEGGTSDR.[N]	1xTMTpro [N-Term]	0.000133789	1	2	1	A0A6P6VVW3	A0A6P6VVW3 [446-459]	A0A6P6VVW3; A0A6P6WF89	0	1636.85	14	131	136.7	132.5	104	67.1	117.2	110	103.7	117.5	67.9	99.9	83.6	130.3	190.2	196.7	161.1	51	229.7	175	176	208.1	73.5	187.5	123.6	2	818.93	3.64	0.00298	21.7454	7.779e-05	1.734e-07	3.54
[truncated: 10,144 more rows]

## Sheet: Sheet2-protein
NO.	Accession	Description	Sequence	Abundances (Scaled): F1: 126, Sample, A1	Abundances (Scaled): F1: 128N, Sample, A2	Abundances (Scaled): F1: 128C, Sample, A3	Abundances (Scaled): F1: 130N, Sample, B1	Abundances (Scaled): F1: 130C, Sample, B2	Abundances (Scaled): F1: 131N, Sample, B3	Abundances (Scaled): F1: 131C, Sample, C1	Abundances (Scaled): F1: 132N, Sample, C2	Abundances (Scaled): F1: 132C, Sample, C3	Abundances (Scaled): F1: 133N, Sample, D1	Abundances (Scaled): F1: 133C, Sample, D2	Abundances (Scaled): F1: 134N, Sample, D3	Coverage [%]	# Peptides	# PSMs	# Unique Peptides	# AAs	MW [kDa]	calc. pI	Score Sequest HT: Sequest HT	# Peptides (by Search Engine): Sequest HT
[truncated: 2,748 more rows]

[truncated: 4 more sheets: Sheet3-B vs A, Sheet4-C vs B, Sheet5-D vs C, Sheet6-KEGG Pathway-protein]
